# Supplementary material
Source: PubMed Central journal article supplement (PMC6834343)
Supplement: NIHMS1056353-supplement-1.pdf [file NIHMS1056353-supplement-1.pdf]

# Development of a Robust Indirect Approach for MM→QM Free Energy Calculations that Combines Force-matched Reference Potential and Bennett's Acceptance Ratio Methods: Supporting Information

Timothy J. Giese and Darrin M. York\*

*Laboratory for Biomolecular Simulation Research, Center for Integrative Proteomics Research  
and Department of Chemistry and Chemical Biology, Rutgers University, Piscataway, NJ  
08854-8087 USA*

E-mail: Darrin.York@rutgers.edu

## Abstract

The tables within this document are the raw data used to perform the statistics shown in the manuscript. In each table:

- The  $\Delta G_{\text{TI3}}^{N_{\lambda}=11}$  column is the reference TI calculation. The reference calculation is evaluated with 11 alchemical states  $\lambda = (0.0, 0.1, \dots, 0.9, 1.0)$ , each simulated for 200 ps. The  $dU/d\lambda$  is integrated from a cubic spline.

---

\*To whom correspondence should be addressed

- The  $\Delta\Delta G_M^{N_\lambda}$  columns are differences between the reference value and the value computed with method  $M$  from  $N_\lambda$  alchemical states. For example,  $\Delta G_{\text{BAR}}^{N_\lambda=2} = \Delta G_{\text{TI3}}^{N_\lambda=11} + \Delta\Delta G_{\text{BAR}}^{N_\lambda=2}$
- The MM' rows correspond to the use of different MM intermediate Hamiltonians. The rows whose MM' is left blank perform the MM-to-QM transformation without an intermediate MM Hamiltonian.
- The  $\Delta\Delta G_{\text{TI}}^{N_\lambda=2}$  values use trapezoidal-rule integration, but all other values ( $N_\lambda > 2$ ) use cubic spline integration.
- The simulation times are the total length of the simulation. The first half of each simulation is discarded as equilibration.
- The IEXP values are free energy perturbation analysis of the QM trajectories and MM energies evaluated at each QM trajectory frame
- the DEXP values are free energy perturbation analysis of the MM trajectories and QM energies evaluated at each MM trajectory frame

Figures 1 and 2 within the supporting information are analogous to Figures 4 and 5 in the main document, respectively; however, the figures in the supporting information display the mean signed errors and the distribution of errors in  $\Delta A^{\text{MM} \rightarrow \text{QM}}$  rather than the mean unsigned errors.

## List of Figures

|   |                                                                                                                                                                                                                                                                                                                                                                                                                           |    |
|---|---------------------------------------------------------------------------------------------------------------------------------------------------------------------------------------------------------------------------------------------------------------------------------------------------------------------------------------------------------------------------------------------------------------------------|----|
| 1 | The solvation free energy mean signed errors of the MM→QM transformations using different analysis methods and MM' intermediate Hamiltonian states. The vertical bars are standard deviations. . . . .                                                                                                                                                                                                                    | 9  |
| 2 | Convergence of the solvation free energy mean signed errors of the MM→QM transformations for 2 $\lambda$ window (i.e., end-state only) simulations as a function of simulation time in ps. In each case, the first half of the simulations were considered as “equilibration” and the second half considered as “production” and used for statistical data collection. The vertical bars are standard deviations. . . . . | 10 |

## List of Tables

|   |                                                                                                              |    |
|---|--------------------------------------------------------------------------------------------------------------|----|
| 1 | MM-to-QM net solvation free energy correction values from 2- $\lambda$ states simulated for 200 ps . . . . . | 11 |
| 2 | MM-to-QM net solvation free energy correction values from 3- $\lambda$ states simulated for 200 ps . . . . . | 15 |
| 3 | MM-to-QM net solvation free energy correction values from 6- $\lambda$ states simulated for 200 ps . . . . . | 19 |
| 4 | MM-to-QM net solvation free energy correction values from 2- $\lambda$ states simulated for 100 ps . . . . . | 23 |
| 5 | MM-to-QM net solvation free energy correction values from 3- $\lambda$ states simulated for 100 ps . . . . . | 27 |
| 6 | MM-to-QM net solvation free energy correction values from 6- $\lambda$ states simulated for 100 ps . . . . . | 31 |
| 7 | MM-to-QM net solvation free energy correction values from 2- $\lambda$ states simulated for 50 ps . . . . .  | 35 |

|    |                                                                                                                        |    |
|----|------------------------------------------------------------------------------------------------------------------------|----|
| 8  | MM-to-QM net solvation free energy correction values from 3- $\lambda$ states simulated for 50 ps . . . . .            | 39 |
| 9  | MM-to-QM net solvation free energy correction values from 6- $\lambda$ states simulated for 50 ps . . . . .            | 43 |
| 10 | MM-to-QM net solvation free energy correction values from 2- $\lambda$ states simulated for 20 ps . . . . .            | 47 |
| 11 | MM-to-QM net solvation free energy correction values from 3- $\lambda$ states simulated for 20 ps . . . . .            | 51 |
| 12 | MM-to-QM net solvation free energy correction values from 6- $\lambda$ states simulated for 20 ps . . . . .            | 55 |
| 13 | MM-to-QM aqueous-phase solvation free energy correction values from 2- $\lambda$ states simulated for 200 ps . . . . . | 59 |
| 14 | MM-to-QM aqueous-phase solvation free energy correction values from 3- $\lambda$ states simulated for 200 ps . . . . . | 63 |
| 15 | MM-to-QM aqueous-phase solvation free energy correction values from 6- $\lambda$ states simulated for 200 ps . . . . . | 67 |
| 16 | MM-to-QM aqueous-phase solvation free energy correction values from 2- $\lambda$ states simulated for 100 ps . . . . . | 71 |
| 17 | MM-to-QM aqueous-phase solvation free energy correction values from 3- $\lambda$ states simulated for 100 ps . . . . . | 75 |
| 18 | MM-to-QM aqueous-phase solvation free energy correction values from 6- $\lambda$ states simulated for 100 ps . . . . . | 79 |
| 19 | MM-to-QM aqueous-phase solvation free energy correction values from 2- $\lambda$ states simulated for 50 ps . . . . .  | 83 |
| 20 | MM-to-QM aqueous-phase solvation free energy correction values from 3- $\lambda$ states simulated for 50 ps . . . . .  | 87 |

|    |                                                                                                                       |     |
|----|-----------------------------------------------------------------------------------------------------------------------|-----|
| 21 | MM-to-QM aqueous-phase solvation free energy correction values from 6- $\lambda$ states simulated for 50 ps . . . . . | 91  |
| 22 | MM-to-QM aqueous-phase solvation free energy correction values from 2- $\lambda$ states simulated for 20 ps . . . . . | 95  |
| 23 | MM-to-QM aqueous-phase solvation free energy correction values from 3- $\lambda$ states simulated for 20 ps . . . . . | 99  |
| 24 | MM-to-QM aqueous-phase solvation free energy correction values from 6- $\lambda$ states simulated for 20 ps . . . . . | 103 |
| 25 | MM-to-QM gas-phase solvation free energy correction values from 2- $\lambda$ states simulated for 200 ps . . . . .    | 107 |
| 26 | MM-to-QM gas-phase solvation free energy correction values from 3- $\lambda$ states simulated for 200 ps . . . . .    | 111 |
| 27 | MM-to-QM gas-phase solvation free energy correction values from 6- $\lambda$ states simulated for 200 ps . . . . .    | 115 |
| 28 | MM-to-QM gas-phase solvation free energy correction values from 2- $\lambda$ states simulated for 100 ps . . . . .    | 119 |
| 29 | MM-to-QM gas-phase solvation free energy correction values from 3- $\lambda$ states simulated for 100 ps . . . . .    | 123 |
| 30 | MM-to-QM gas-phase solvation free energy correction values from 6- $\lambda$ states simulated for 100 ps . . . . .    | 127 |
| 31 | MM-to-QM gas-phase solvation free energy correction values from 2- $\lambda$ states simulated for 50 ps . . . . .     | 131 |
| 32 | MM-to-QM gas-phase solvation free energy correction values from 3- $\lambda$ states simulated for 50 ps . . . . .     | 135 |
| 33 | MM-to-QM gas-phase solvation free energy correction values from 6- $\lambda$ states simulated for 50 ps . . . . .     | 139 |

|    |                                                                                                                   |     |
|----|-------------------------------------------------------------------------------------------------------------------|-----|
| 34 | MM-to-QM gas-phase solvation free energy correction values from 2- $\lambda$ states simulated for 20 ps . . . . . | 143 |
| 35 | MM-to-QM gas-phase solvation free energy correction values from 3- $\lambda$ states simulated for 20 ps . . . . . | 147 |
| 36 | MM-to-QM gas-phase solvation free energy correction values from 6- $\lambda$ states simulated for 20 ps . . . . . | 151 |
| 37 | MM-to-QM net ligand binding free energy correction values 2- $\lambda$ states simulated for 200 ps . . . . .      | 155 |
| 38 | MM-to-QM net ligand binding free energy correction values 3- $\lambda$ states simulated for 200 ps . . . . .      | 157 |
| 39 | MM-to-QM net ligand binding free energy correction values 6- $\lambda$ states simulated for 200 ps . . . . .      | 159 |
| 40 | MM-to-QM net ligand binding free energy correction values 2- $\lambda$ states simulated for 100 ps . . . . .      | 161 |
| 41 | MM-to-QM net ligand binding free energy correction values 3- $\lambda$ states simulated for 100 ps . . . . .      | 163 |
| 42 | MM-to-QM net ligand binding free energy correction values 6- $\lambda$ states simulated for 100 ps . . . . .      | 165 |
| 43 | MM-to-QM net ligand binding free energy correction values 2- $\lambda$ states simulated for 50 ps . . . . .       | 167 |
| 44 | MM-to-QM net ligand binding free energy correction values 3- $\lambda$ states simulated for 50 ps . . . . .       | 169 |
| 45 | MM-to-QM net ligand binding free energy correction values 6- $\lambda$ states simulated for 50 ps . . . . .       | 171 |
| 46 | MM-to-QM net ligand binding free energy correction values 2- $\lambda$ states simulated for 20 ps . . . . .       | 173 |

|    |                                                                                                                      |     |
|----|----------------------------------------------------------------------------------------------------------------------|-----|
| 47 | MM-to-QM net ligand binding free energy correction values 3- $\lambda$ states simulated for 20 ps . . . . .          | 175 |
| 48 | MM-to-QM net ligand binding free energy correction values 6- $\lambda$ states simulated for 20 ps . . . . .          | 177 |
| 49 | MM-to-QM bound-state ligand binding free energy correction values 2- $\lambda$ states simulated for 200 ps . . . . . | 179 |
| 50 | MM-to-QM bound-state ligand binding free energy correction values 3- $\lambda$ states simulated for 200 ps . . . . . | 181 |
| 51 | MM-to-QM bound-state ligand binding free energy correction values 6- $\lambda$ states simulated for 200 ps . . . . . | 183 |
| 52 | MM-to-QM bound-state ligand binding free energy correction values 2- $\lambda$ states simulated for 100 ps . . . . . | 185 |
| 53 | MM-to-QM bound-state ligand binding free energy correction values 3- $\lambda$ states simulated for 100 ps . . . . . | 187 |
| 54 | MM-to-QM bound-state ligand binding free energy correction values 6- $\lambda$ states simulated for 100 ps . . . . . | 189 |
| 55 | MM-to-QM bound-state ligand binding free energy correction values 2- $\lambda$ states simulated for 50 ps . . . . .  | 191 |
| 56 | MM-to-QM bound-state ligand binding free energy correction values 3- $\lambda$ states simulated for 50 ps . . . . .  | 193 |
| 57 | MM-to-QM bound-state ligand binding free energy correction values 6- $\lambda$ states simulated for 50 ps . . . . .  | 195 |
| 58 | MM-to-QM bound-state ligand binding free energy correction values 2- $\lambda$ states simulated for 20 ps . . . . .  | 197 |
| 59 | MM-to-QM bound-state ligand binding free energy correction values 3- $\lambda$ states simulated for 20 ps . . . . .  | 199 |

|    |                                                                                                                           |     |
|----|---------------------------------------------------------------------------------------------------------------------------|-----|
| 60 | MM-to-QM bound-state ligand binding free energy correction values 6- $\lambda$ states<br>simulated for 20 ps . . . . .    | 201 |
| 61 | MM-to-QM unbound-state ligand binding free energy correction values 2- $\lambda$ states<br>simulated for 200 ps . . . . . | 203 |
| 62 | MM-to-QM unbound-state ligand binding free energy correction values 3- $\lambda$ states<br>simulated for 200 ps . . . . . | 205 |
| 63 | MM-to-QM unbound-state ligand binding free energy correction values 6- $\lambda$ states<br>simulated for 200 ps . . . . . | 207 |
| 64 | MM-to-QM unbound-state ligand binding free energy correction values 2- $\lambda$ states<br>simulated for 100 ps . . . . . | 209 |
| 65 | MM-to-QM unbound-state ligand binding free energy correction values 3- $\lambda$ states<br>simulated for 100 ps . . . . . | 211 |
| 66 | MM-to-QM unbound-state ligand binding free energy correction values 6- $\lambda$ states<br>simulated for 100 ps . . . . . | 213 |
| 67 | MM-to-QM unbound-state ligand binding free energy correction values 2- $\lambda$ states<br>simulated for 50 ps . . . . .  | 215 |
| 68 | MM-to-QM unbound-state ligand binding free energy correction values 3- $\lambda$ states<br>simulated for 50 ps . . . . .  | 217 |
| 69 | MM-to-QM unbound-state ligand binding free energy correction values 6- $\lambda$ states<br>simulated for 50 ps . . . . .  | 219 |
| 70 | MM-to-QM unbound-state ligand binding free energy correction values 2- $\lambda$ states<br>simulated for 20 ps . . . . .  | 221 |
| 71 | MM-to-QM unbound-state ligand binding free energy correction values 3- $\lambda$ states<br>simulated for 20 ps . . . . .  | 223 |
| 72 | MM-to-QM unbound-state ligand binding free energy correction values 6- $\lambda$ states<br>simulated for 20 ps . . . . .  | 225 |



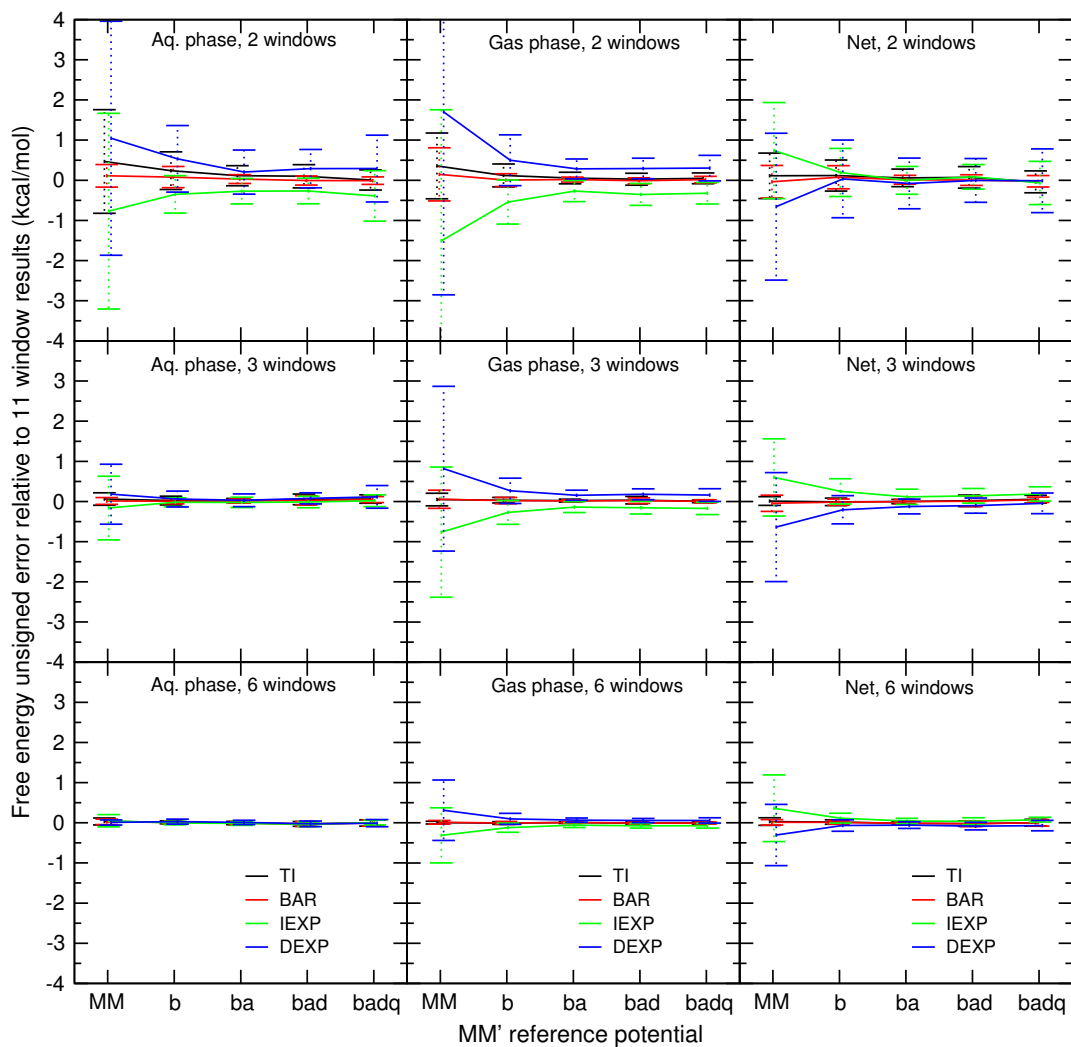

Figure 1: The solvation free energy mean signed errors of the MM→QM transformations using different analysis methods and MM' intermediate Hamiltonian states. The vertical bars are standard deviations.

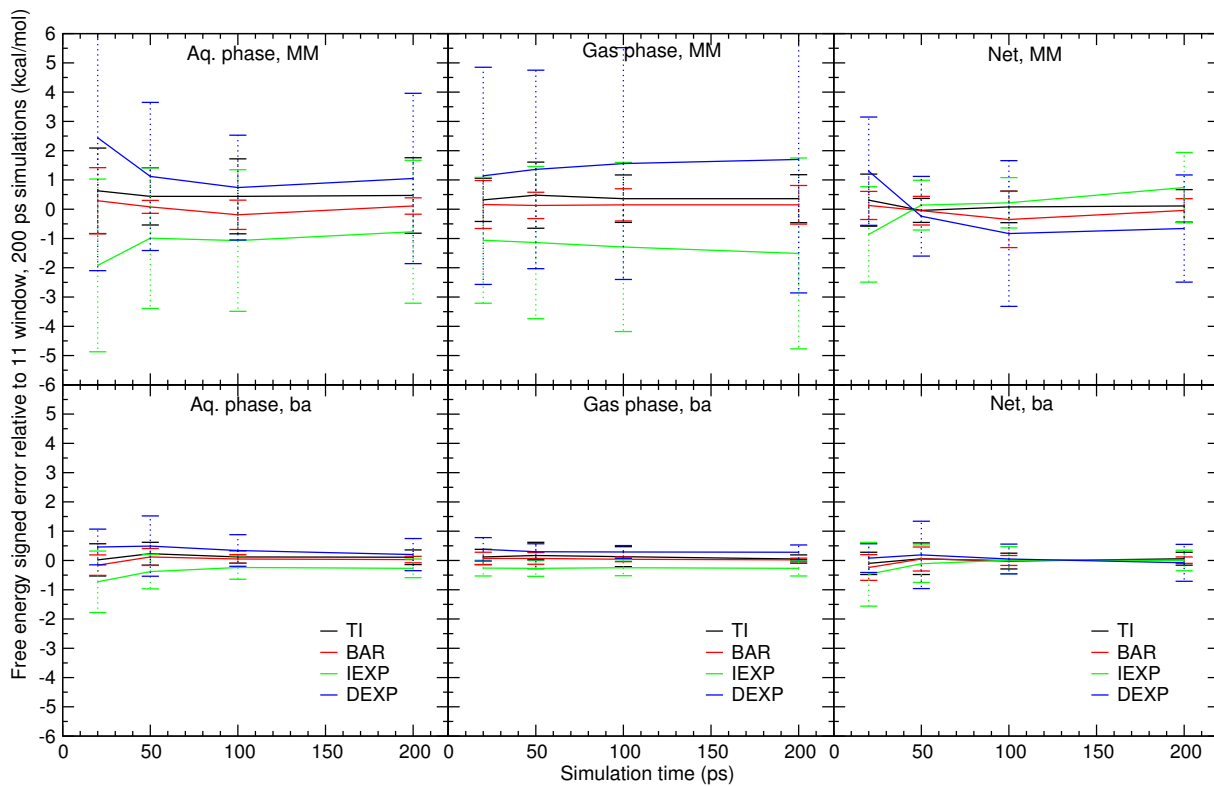

Figure 2: Convergence of the solvation free energy mean signed errors of the MM→QM transformations for  $2\lambda$  window (i.e., end-state only) simulations as a function of simulation time in ps. In each case, the first half of the simulations were considered as “equilibration” and the second half considered as “production” and used for statistical data collection. The vertical bars are standard deviations.

Table 1: MM-to-QM net solvation free energy correction values from 2- $\lambda$  states simulated for 200 ps

| Molec.                     | MM'  | $\Delta G_{\text{TI3}}^{N_\lambda=11}$ | $\Delta\Delta G_{\text{TI}}^{N_\lambda=2}$ | $\Delta\Delta G_{\text{BAR}}^{N_\lambda=2}$ | $\Delta\Delta G_{\text{IEXP}}^{N_\lambda=1}$ | $\Delta\Delta G_{\text{DEXP}}^{N_\lambda=1}$ |
|----------------------------|------|----------------------------------------|--------------------------------------------|---------------------------------------------|----------------------------------------------|----------------------------------------------|
| $\text{CO}_3^{2-}$         |      | $-6.45 \pm 0.12$                       | $2.14 \pm 0.37$                            | $-1.51 \pm 0.74$                            | $4.08 \pm 0.40$                              | $-7.10 \pm 0.63$                             |
|                            | b    | $-6.47 \pm 0.07$                       | $1.54 \pm 0.15$                            | $1.03 \pm 0.34$                             | $-0.61 \pm 0.25$                             | $3.29 \pm 0.27$                              |
|                            | ba   | $-6.13 \pm 0.06$                       | $0.78 \pm 0.13$                            | $0.34 \pm 0.29$                             | $-0.49 \pm 0.40$                             | $1.79 \pm 0.32$                              |
|                            | bad  | $-6.09 \pm 0.06$                       | $0.99 \pm 0.14$                            | $0.20 \pm 0.33$                             | $-0.54 \pm 0.53$                             | $1.75 \pm 0.37$                              |
|                            | badq | $-6.07 \pm 0.06$                       | $0.57 \pm 0.13$                            | $0.05 \pm 0.28$                             | $-0.33 \pm 0.44$                             | $0.23 \pm 0.34$                              |
| $\text{CH}_3\text{NH}_3^+$ |      | $1.79 \pm 0.04$                        | $0.19 \pm 0.11$                            | $0.13 \pm 0.13$                             | $-0.30 \pm 0.16$                             | $0.24 \pm 0.25$                              |
|                            | b    | $1.89 \pm 0.03$                        | $0.09 \pm 0.06$                            | $0.08 \pm 0.08$                             | $-0.18 \pm 0.11$                             | $0.12 \pm 0.14$                              |
|                            | ba   | $1.89 \pm 0.03$                        | $-0.04 \pm 0.05$                           | $-0.06 \pm 0.05$                            | $-0.09 \pm 0.07$                             | $-0.07 \pm 0.09$                             |
|                            | bad  | $1.79 \pm 0.04$                        | $0.12 \pm 0.05$                            | $0.12 \pm 0.05$                             | $0.26 \pm 0.07$                              | $-0.09 \pm 0.09$                             |
|                            | badq | $1.80 \pm 0.03$                        | $0.00 \pm 0.04$                            | $-0.01 \pm 0.05$                            | $0.11 \pm 0.07$                              | $-0.16 \pm 0.13$                             |
| $\text{NH}_4^+$            |      | $5.64 \pm 0.04$                        | $0.28 \pm 0.09$                            | $-0.02 \pm 0.10$                            | $-0.38 \pm 0.15$                             | $0.21 \pm 0.27$                              |
|                            | b    | $5.69 \pm 0.02$                        | $-0.01 \pm 0.02$                           | $-0.01 \pm 0.02$                            | $-0.01 \pm 0.03$                             | $-0.02 \pm 0.03$                             |
|                            | ba   | $5.68 \pm 0.01$                        | $-0.00 \pm 0.02$                           | $-0.00 \pm 0.02$                            | $-0.02 \pm 0.02$                             | $0.01 \pm 0.02$                              |
|                            | bad  | $5.68 \pm 0.01$                        | $-0.00 \pm 0.02$                           | $-0.00 \pm 0.02$                            | $-0.02 \pm 0.02$                             | $0.01 \pm 0.02$                              |
|                            | badq | $5.70 \pm 0.02$                        | $-0.02 \pm 0.03$                           | $-0.03 \pm 0.03$                            | $-0.03 \pm 0.03$                             | $-0.02 \pm 0.03$                             |
| $\text{CH}_3\text{CO}_2^-$ |      | $-9.33 \pm 0.08$                       | $-0.60 \pm 0.23$                           | $0.23 \pm 0.60$                             | $1.11 \pm 0.54$                              | $0.55 \pm 0.60$                              |
|                            | b    | $-9.52 \pm 0.07$                       | $0.02 \pm 0.16$                            | $-0.13 \pm 0.25$                            | $-0.16 \pm 0.30$                             | $-0.17 \pm 0.30$                             |
|                            | ba   | $-9.29 \pm 0.05$                       | $0.31 \pm 0.11$                            | $0.04 \pm 0.19$                             | $-0.64 \pm 0.33$                             | $0.40 \pm 0.30$                              |
|                            | bad  | $-9.14 \pm 0.05$                       | $0.19 \pm 0.11$                            | $-0.01 \pm 0.21$                            | $-0.27 \pm 0.41$                             | $0.21 \pm 0.34$                              |
|                            | badq | $-9.27 \pm 0.07$                       | $0.06 \pm 0.14$                            | $0.23 \pm 0.41$                             | $-1.29 \pm 0.46$                             | $1.94 \pm 0.45$                              |
| $\text{H}_3\text{O}^+$     |      | $6.51 \pm 0.05$                        | $0.24 \pm 0.13$                            | $0.00 \pm 0.24$                             | $1.80 \pm 0.57$                              | $-0.86 \pm 0.36$                             |
|                            | b    | $6.42 \pm 0.04$                        | $0.11 \pm 0.10$                            | $0.23 \pm 0.16$                             | $1.64 \pm 0.35$                              | $-0.40 \pm 0.29$                             |
|                            | ba   | $6.35 \pm 0.02$                        | $-0.04 \pm 0.04$                           | $-0.04 \pm 0.04$                            | $0.14 \pm 0.05$                              | $-0.20 \pm 0.05$                             |

*Continued on next page*

Table 1 – Continued from previous page

| Molec.                          | MM'  | $\Delta G_{\text{TI3}}^{N_i=11}$ | $\Delta \Delta G_{\text{TI}}^{N_i=2}$ | $\Delta \Delta G_{\text{BAR}}^{N_i=2}$ | $\Delta \Delta G_{\text{IEXP}}^{N_i=1}$ | $\Delta \Delta G_{\text{DEXP}}^{N_i=1}$ |
|---------------------------------|------|----------------------------------|---------------------------------------|----------------------------------------|-----------------------------------------|-----------------------------------------|
|                                 | bad  | $6.35 \pm 0.02$                  | $-0.04 \pm 0.04$                      | $-0.04 \pm 0.04$                       | $0.14 \pm 0.05$                         | $-0.20 \pm 0.05$                        |
|                                 | badq | $6.41 \pm 0.02$                  | $0.05 \pm 0.04$                       | $0.05 \pm 0.04$                        | $0.12 \pm 0.06$                         | $0.00 \pm 0.06$                         |
| $\text{C}_6\text{H}_5\text{Cl}$ |      | $0.38 \pm 0.04$                  | $-0.07 \pm 0.09$                      | $0.11 \pm 0.11$                        | $-0.10 \pm 0.17$                        | $0.24 \pm 0.23$                         |
|                                 | b    | $0.55 \pm 0.04$                  | $0.01 \pm 0.10$                       | $0.08 \pm 0.10$                        | $-0.29 \pm 0.14$                        | $0.50 \pm 0.18$                         |
|                                 | ba   | $-0.04 \pm 0.03$                 | $-0.01 \pm 0.10$                      | $-0.01 \pm 0.11$                       | $-0.17 \pm 0.13$                        | $-0.40 \pm 0.34$                        |
|                                 | bad  | $-0.22 \pm 0.04$                 | $0.05 \pm 0.09$                       | $0.09 \pm 0.10$                        | $0.14 \pm 0.14$                         | $0.05 \pm 0.23$                         |
|                                 | badq | $-0.40 \pm 0.04$                 | $0.09 \pm 0.09$                       | $0.15 \pm 0.10$                        | $0.49 \pm 0.35$                         | $-0.01 \pm 0.16$                        |
| $\text{C}_6\text{H}_{14}$       |      | $-0.43 \pm 0.03$                 | $0.04 \pm 0.08$                       | $0.07 \pm 0.09$                        | $0.59 \pm 0.17$                         | $-0.58 \pm 0.18$                        |
|                                 | b    | $-0.56 \pm 0.04$                 | $0.09 \pm 0.08$                       | $0.06 \pm 0.09$                        | $0.17 \pm 0.12$                         | $-0.12 \pm 0.14$                        |
|                                 | ba   | $-0.45 \pm 0.08$                 | $-0.05 \pm 0.10$                      | $-0.06 \pm 0.11$                       | $0.25 \pm 0.18$                         | $-0.39 \pm 0.15$                        |
|                                 | bad  | $-0.47 \pm 0.03$                 | $-0.13 \pm 0.06$                      | $-0.09 \pm 0.08$                       | $0.28 \pm 0.21$                         | $-0.45 \pm 0.12$                        |
|                                 | badq | $-0.47 \pm 0.03$                 | $-0.07 \pm 0.07$                      | $-0.04 \pm 0.09$                       | $0.42 \pm 0.22$                         | $-0.37 \pm 0.12$                        |
| $\text{CH}_3\text{OH}$          |      | $-2.16 \pm 0.03$                 | $-0.06 \pm 0.08$                      | $0.01 \pm 0.12$                        | $0.12 \pm 0.25$                         | $-0.55 \pm 0.28$                        |
|                                 | b    | $-2.13 \pm 0.03$                 | $-0.18 \pm 0.08$                      | $-0.16 \pm 0.13$                       | $0.02 \pm 0.25$                         | $-0.55 \pm 0.26$                        |
|                                 | ba   | $-2.13 \pm 0.03$                 | $-0.08 \pm 0.07$                      | $-0.01 \pm 0.14$                       | $-0.05 \pm 0.22$                        | $-0.69 \pm 0.46$                        |
|                                 | bad  | $-1.99 \pm 0.04$                 | $-0.25 \pm 0.08$                      | $-0.21 \pm 0.12$                       | $-0.05 \pm 0.24$                        | $-0.25 \pm 0.16$                        |
|                                 | badq | $-1.99 \pm 0.04$                 | $-0.18 \pm 0.09$                      | $-0.24 \pm 0.14$                       | $0.27 \pm 0.37$                         | $-0.85 \pm 0.28$                        |
| $\text{C}_2\text{H}_6$          |      | $0.05 \pm 0.02$                  | $-0.03 \pm 0.08$                      | $-0.01 \pm 0.06$                       | $0.06 \pm 0.12$                         | $-0.10 \pm 0.06$                        |
|                                 | b    | $0.06 \pm 0.04$                  | $-0.01 \pm 0.06$                      | $-0.04 \pm 0.06$                       | $0.00 \pm 0.09$                         | $0.01 \pm 0.07$                         |
|                                 | ba   | $0.09 \pm 0.10$                  | $-0.05 \pm 0.10$                      | $-0.05 \pm 0.10$                       | $-0.09 \pm 0.12$                        | $0.04 \pm 0.10$                         |
|                                 | bad  | $0.13 \pm 0.12$                  | $0.02 \pm 0.12$                       | $0.01 \pm 0.12$                        | $-0.08 \pm 0.13$                        | $0.09 \pm 0.13$                         |
|                                 | badq | $0.07 \pm 0.08$                  | $-0.03 \pm 0.09$                      | $-0.04 \pm 0.09$                       | $-0.08 \pm 0.10$                        | $-0.03 \pm 0.10$                        |
| $(\text{CH}_2)_4\text{O}$       |      | $-1.97 \pm 0.05$                 | $-0.32 \pm 0.12$                      | $-0.28 \pm 0.19$                       | $0.96 \pm 0.32$                         | $-2.43 \pm 0.57$                        |
|                                 | b    | $-2.04 \pm 0.05$                 | $-0.10 \pm 0.14$                      | $-0.25 \pm 0.27$                       | $0.47 \pm 0.22$                         | $-1.61 \pm 0.36$                        |

Continued on next page

Table 1 – Continued from previous page

| Molec.                            | MM'  | $\Delta G_{\text{TI3}}^{N_i=11}$ | $\Delta\Delta G_{\text{TI}}^{N_i=2}$ | $\Delta\Delta G_{\text{BAR}}^{N_i=2}$ | $\Delta\Delta G_{\text{IEXP}}^{N_i=1}$ | $\Delta\Delta G_{\text{DEXP}}^{N_i=1}$ |
|-----------------------------------|------|----------------------------------|--------------------------------------|---------------------------------------|----------------------------------------|----------------------------------------|
|                                   | ba   | $-2.28 \pm 0.03$                 | $-0.04 \pm 0.09$                     | $0.04 \pm 0.13$                       | $0.22 \pm 0.17$                        | $0.21 \pm 0.16$                        |
|                                   | bad  | $-2.20 \pm 0.03$                 | $-0.22 \pm 0.10$                     | $-0.30 \pm 0.13$                      | $0.25 \pm 0.17$                        | $-0.85 \pm 0.26$                       |
|                                   | badq | $-2.16 \pm 0.03$                 | $0.07 \pm 0.09$                      | $0.01 \pm 0.11$                       | $0.42 \pm 0.14$                        | $-0.80 \pm 0.17$                       |
| $\text{C}(\text{NH}_2)_3^+$       |      | $-0.97 \pm 0.06$                 | $-0.06 \pm 0.24$                     | $0.33 \pm 0.32$                       | $0.23 \pm 0.25$                        | $1.14 \pm 0.36$                        |
|                                   | b    | $-0.24 \pm 0.06$                 | $0.36 \pm 0.21$                      | $0.17 \pm 0.24$                       | $0.19 \pm 0.22$                        | $0.35 \pm 0.42$                        |
|                                   | ba   | $-0.60 \pm 0.05$                 | $0.06 \pm 0.17$                      | $-0.15 \pm 0.16$                      | $-0.28 \pm 0.39$                       | $-0.03 \pm 0.32$                       |
|                                   | bad  | $-0.36 \pm 0.05$                 | $0.12 \pm 0.16$                      | $-0.04 \pm 0.14$                      | $0.12 \pm 0.25$                        | $-0.10 \pm 0.25$                       |
|                                   | badq | $-0.02 \pm 0.05$                 | $-0.24 \pm 0.13$                     | $-0.21 \pm 0.15$                      | $-0.13 \pm 0.31$                       | $-0.85 \pm 0.45$                       |
| $\text{C}_6\text{H}_5\text{NH}_2$ |      | $-3.04 \pm 0.04$                 | $0.16 \pm 0.10$                      | $0.09 \pm 0.21$                       | $0.77 \pm 0.26$                        | $-0.97 \pm 0.29$                       |
|                                   | b    | $-3.06 \pm 0.04$                 | $0.17 \pm 0.09$                      | $0.06 \pm 0.20$                       | $0.89 \pm 0.53$                        | $-0.34 \pm 0.24$                       |
|                                   | ba   | $-3.09 \pm 0.05$                 | $0.11 \pm 0.09$                      | $-0.10 \pm 0.13$                      | $-0.23 \pm 0.18$                       | $-0.73 \pm 0.35$                       |
|                                   | bad  | $-3.22 \pm 0.04$                 | $0.09 \pm 0.08$                      | $-0.03 \pm 0.12$                      | $-0.10 \pm 0.22$                       | $0.00 \pm 0.13$                        |
|                                   | badq | $-3.26 \pm 0.08$                 | $-0.26 \pm 0.17$                     | $-0.31 \pm 0.53$                      | $-1.18 \pm 0.47$                       | $1.20 \pm 0.43$                        |
| $\text{CH}_3\text{CONH}_2$        |      | $-3.59 \pm 0.05$                 | $-0.14 \pm 0.12$                     | $0.17 \pm 0.19$                       | $2.77 \pm 0.22$                        | $-0.39 \pm 0.30$                       |
|                                   | b    | $-3.41 \pm 0.04$                 | $-0.06 \pm 0.11$                     | $0.32 \pm 0.20$                       | $1.31 \pm 0.50$                        | $-0.00 \pm 0.18$                       |
|                                   | ba   | $-3.52 \pm 0.05$                 | $-0.18 \pm 0.11$                     | $0.08 \pm 0.16$                       | $0.67 \pm 0.17$                        | $-0.40 \pm 0.29$                       |
|                                   | bad  | $-3.50 \pm 0.04$                 | $-0.09 \pm 0.10$                     | $0.18 \pm 0.17$                       | $0.69 \pm 0.40$                        | $-0.20 \pm 0.27$                       |
|                                   | badq | $-3.59 \pm 0.04$                 | $0.13 \pm 0.09$                      | $0.18 \pm 0.11$                       | $0.49 \pm 0.21$                        | $-0.07 \pm 0.14$                       |
| $\text{H}_2\text{O}$              |      | $-3.62 \pm 0.03$                 | $-0.09 \pm 0.07$                     | $-0.12 \pm 0.14$                      | $-0.59 \pm 0.14$                       | $0.14 \pm 0.21$                        |
|                                   | b    | $-3.72 \pm 0.03$                 | $0.03 \pm 0.07$                      | $-0.05 \pm 0.16$                      | $-0.43 \pm 0.24$                       | $-0.17 \pm 0.23$                       |
|                                   | ba   | $-3.78 \pm 0.03$                 | $0.20 \pm 0.07$                      | $0.14 \pm 0.16$                       | $-0.31 \pm 0.20$                       | $0.43 \pm 0.24$                        |
|                                   | bad  | $-3.79 \pm 0.03$                 | $0.20 \pm 0.07$                      | $0.14 \pm 0.16$                       | $-0.31 \pm 0.20$                       | $0.43 \pm 0.24$                        |
|                                   | badq | $-3.72 \pm 0.03$                 | $0.01 \pm 0.07$                      | $0.00 \pm 0.14$                       | $-0.33 \pm 0.21$                       | $-0.08 \pm 0.23$                       |
| $\text{C}_2\text{H}_5\text{OH}$   |      | $-2.71 \pm 0.04$                 | $0.16 \pm 0.09$                      | $0.19 \pm 0.15$                       | $0.31 \pm 0.17$                        | $-0.06 \pm 0.23$                       |

Continued on next page

Table 1 – Continued from previous page

| Molec.                          | MM'  | $\Delta G_{\text{TI3}}^{N_i=11}$ | $\Delta \Delta G_{\text{TI}}^{N_i=2}$ | $\Delta \Delta G_{\text{BAR}}^{N_i=2}$ | $\Delta \Delta G_{\text{IEXP}}^{N_i=1}$ | $\Delta \Delta G_{\text{DEXP}}^{N_i=1}$ |
|---------------------------------|------|----------------------------------|---------------------------------------|----------------------------------------|-----------------------------------------|-----------------------------------------|
|                                 | b    | $-2.60 \pm 0.04$                 | $0.10 \pm 0.08$                       | $0.10 \pm 0.16$                        | $-0.16 \pm 0.19$                        | $0.43 \pm 0.20$                         |
|                                 | ba   | $-2.72 \pm 0.05$                 | $-0.10 \pm 0.09$                      | $-0.03 \pm 0.15$                       | $0.50 \pm 0.21$                         | $-1.16 \pm 0.16$                        |
|                                 | bad  | $-2.79 \pm 0.05$                 | $0.03 \pm 0.09$                       | $-0.06 \pm 0.13$                       | $0.54 \pm 0.20$                         | $-0.58 \pm 0.21$                        |
|                                 | badq | $-2.83 \pm 0.04$                 | $0.01 \pm 0.09$                       | $-0.07 \pm 0.13$                       | $0.36 \pm 0.23$                         | $-1.29 \pm 0.16$                        |
| $\text{C}_6\text{H}_6$          |      | $-0.94 \pm 0.02$                 | $0.06 \pm 0.05$                       | $-0.02 \pm 0.07$                       | $0.35 \pm 0.15$                         | $-0.42 \pm 0.13$                        |
|                                 | b    | $-0.86 \pm 0.02$                 | $-0.11 \pm 0.05$                      | $-0.16 \pm 0.06$                       | $0.04 \pm 0.14$                         | $-0.50 \pm 0.13$                        |
|                                 | ba   | $-0.70 \pm 0.08$                 | $0.05 \pm 0.09$                       | $0.00 \pm 0.10$                        | $0.17 \pm 0.22$                         | $-0.08 \pm 0.13$                        |
|                                 | bad  | $-0.59 \pm 0.16$                 | $0.06 \pm 0.17$                       | $-0.01 \pm 0.17$                       | $0.09 \pm 0.26$                         | $-0.04 \pm 0.18$                        |
|                                 | badq | $-0.67 \pm 0.02$                 | $-0.04 \pm 0.04$                      | $-0.01 \pm 0.06$                       | $0.13 \pm 0.20$                         | $0.01 \pm 0.11$                         |
| $\text{C}_6\text{H}_5\text{OH}$ |      | $-2.17 \pm 0.03$                 | $-0.02 \pm 0.09$                      | $0.01 \pm 0.13$                        | $0.81 \pm 0.32$                         | $-0.23 \pm 0.20$                        |
|                                 | b    | $-2.13 \pm 0.04$                 | $-0.04 \pm 0.08$                      | $-0.05 \pm 0.13$                       | $0.39 \pm 0.28$                         | $-0.24 \pm 0.23$                        |
|                                 | ba   | $-2.26 \pm 0.03$                 | $0.09 \pm 0.08$                       | $0.09 \pm 0.13$                        | $0.38 \pm 0.23$                         | $-0.07 \pm 0.24$                        |
|                                 | bad  | $-2.22 \pm 0.03$                 | $0.10 \pm 0.08$                       | $0.14 \pm 0.13$                        | $0.32 \pm 0.24$                         | $0.14 \pm 0.20$                         |
|                                 | badq | $-2.36 \pm 0.06$                 | $-0.83 \pm 0.15$                      | $-0.14 \pm 0.44$                       | $-0.57 \pm 0.34$                        | $0.95 \pm 0.36$                         |

Table 2: MM-to-QM net solvation free energy correction values from 3- $\lambda$  states simulated for 200 ps

| Molec.                     | MM'  | $\Delta G_{\text{TI}3}^{N_\lambda=11}$ | $\Delta\Delta G_{\text{TI}}^{N_\lambda=3}$ | $\Delta\Delta G_{\text{BAR}}^{N_\lambda=3}$ | $\Delta\Delta G_{\text{IEXP}}^{N_\lambda=2}$ | $\Delta\Delta G_{\text{DEXP}}^{N_\lambda=2}$ |
|----------------------------|------|----------------------------------------|--------------------------------------------|---------------------------------------------|----------------------------------------------|----------------------------------------------|
| $\text{CO}_3^{2-}$         |      | $-6.45 \pm 0.12$                       | $0.09 \pm 0.28$                            | $-0.73 \pm 0.53$                            | $3.86 \pm 0.44$                              | $-5.72 \pm 0.57$                             |
|                            | b    | $-6.47 \pm 0.07$                       | $-0.04 \pm 0.14$                           | $0.00 \pm 0.14$                             | $0.03 \pm 0.24$                              | $0.46 \pm 0.20$                              |
|                            | ba   | $-6.13 \pm 0.06$                       | $0.04 \pm 0.12$                            | $0.01 \pm 0.11$                             | $-0.09 \pm 0.29$                             | $0.30 \pm 0.21$                              |
|                            | bad  | $-6.09 \pm 0.06$                       | $0.32 \pm 0.12$                            | $0.20 \pm 0.14$                             | $0.25 \pm 0.37$                              | $0.32 \pm 0.22$                              |
|                            | badq | $-6.07 \pm 0.06$                       | $0.02 \pm 0.12$                            | $0.00 \pm 0.11$                             | $0.24 \pm 0.25$                              | $-0.01 \pm 0.18$                             |
| $\text{CH}_3\text{NH}_3^+$ |      | $1.79 \pm 0.04$                        | $0.09 \pm 0.09$                            | $0.09 \pm 0.08$                             | $-0.04 \pm 0.14$                             | $0.11 \pm 0.14$                              |
|                            | b    | $1.89 \pm 0.03$                        | $0.03 \pm 0.06$                            | $0.03 \pm 0.06$                             | $0.13 \pm 0.08$                              | $-0.01 \pm 0.08$                             |
|                            | ba   | $1.89 \pm 0.03$                        | $-0.03 \pm 0.05$                           | $-0.03 \pm 0.05$                            | $-0.06 \pm 0.05$                             | $-0.03 \pm 0.06$                             |
|                            | bad  | $1.79 \pm 0.04$                        | $0.02 \pm 0.05$                            | $0.04 \pm 0.05$                             | $0.15 \pm 0.07$                              | $-0.08 \pm 0.06$                             |
|                            | badq | $1.80 \pm 0.03$                        | $0.07 \pm 0.04$                            | $0.06 \pm 0.04$                             | $0.13 \pm 0.05$                              | $-0.01 \pm 0.06$                             |
| $\text{NH}_4^+$            |      | $5.64 \pm 0.04$                        | $-0.05 \pm 0.07$                           | $-0.08 \pm 0.06$                            | $-0.07 \pm 0.14$                             | $0.01 \pm 0.10$                              |
|                            | b    | $5.69 \pm 0.02$                        | $0.02 \pm 0.02$                            | $0.01 \pm 0.02$                             | $0.02 \pm 0.03$                              | $0.00 \pm 0.03$                              |
|                            | ba   | $5.68 \pm 0.01$                        | $0.00 \pm 0.02$                            | $0.00 \pm 0.01$                             | $-0.00 \pm 0.02$                             | $0.01 \pm 0.02$                              |
|                            | bad  | $5.68 \pm 0.01$                        | $0.00 \pm 0.02$                            | $0.00 \pm 0.01$                             | $-0.00 \pm 0.02$                             | $0.01 \pm 0.02$                              |
|                            | badq | $5.70 \pm 0.02$                        | $0.02 \pm 0.03$                            | $0.01 \pm 0.02$                             | $0.01 \pm 0.03$                              | $0.01 \pm 0.03$                              |
| $\text{CH}_3\text{CO}_2^-$ |      | $-9.33 \pm 0.08$                       | $0.13 \pm 0.17$                            | $0.06 \pm 0.19$                             | $1.61 \pm 0.49$                              | $-0.18 \pm 0.34$                             |
|                            | b    | $-9.52 \pm 0.07$                       | $0.08 \pm 0.13$                            | $-0.00 \pm 0.13$                            | $0.31 \pm 0.21$                              | $-0.28 \pm 0.21$                             |
|                            | ba   | $-9.29 \pm 0.05$                       | $-0.01 \pm 0.11$                           | $-0.02 \pm 0.11$                            | $-0.12 \pm 0.17$                             | $-0.06 \pm 0.18$                             |
|                            | bad  | $-9.14 \pm 0.05$                       | $-0.06 \pm 0.10$                           | $-0.08 \pm 0.11$                            | $0.04 \pm 0.22$                              | $-0.11 \pm 0.17$                             |
|                            | badq | $-9.27 \pm 0.07$                       | $0.10 \pm 0.13$                            | $0.08 \pm 0.14$                             | $-0.15 \pm 0.29$                             | $0.50 \pm 0.31$                              |
| $\text{H}_3\text{O}^+$     |      | $6.51 \pm 0.05$                        | $0.21 \pm 0.12$                            | $0.06 \pm 0.11$                             | $0.98 \pm 0.36$                              | $-1.11 \pm 0.22$                             |
|                            | b    | $6.42 \pm 0.04$                        | $-0.10 \pm 0.10$                           | $-0.08 \pm 0.10$                            | $0.59 \pm 0.20$                              | $-0.47 \pm 0.17$                             |
|                            | ba   | $6.35 \pm 0.02$                        | $0.03 \pm 0.04$                            | $0.02 \pm 0.03$                             | $0.12 \pm 0.05$                              | $-0.07 \pm 0.04$                             |

*Continued on next page*

Table 2 – Continued from previous page

| Molec.                           | MM'  | $\Delta G_{\text{TI3}}^{N_i=11}$ | $\Delta \Delta G_{\text{TI}}^{N_i=3}$ | $\Delta \Delta G_{\text{BAR}}^{N_i=3}$ | $\Delta \Delta G_{\text{IEXP}}^{N_i=2}$ | $\Delta \Delta G_{\text{DEXP}}^{N_i=2}$ |
|----------------------------------|------|----------------------------------|---------------------------------------|----------------------------------------|-----------------------------------------|-----------------------------------------|
| C <sub>6</sub> H <sub>5</sub> Cl | bad  | 6.35 ± 0.02                      | 0.03 ± 0.04                           | 0.02 ± 0.03                            | 0.12 ± 0.05                             | -0.07 ± 0.04                            |
|                                  | badq | 6.41 ± 0.02                      | 0.00 ± 0.03                           | 0.01 ± 0.03                            | 0.04 ± 0.04                             | 0.00 ± 0.04                             |
|                                  |      | 0.38 ± 0.04                      | 0.08 ± 0.09                           | 0.10 ± 0.07                            | 0.17 ± 0.12                             | -0.03 ± 0.13                            |
|                                  | b    | 0.55 ± 0.04                      | -0.08 ± 0.09                          | -0.07 ± 0.08                           | -0.22 ± 0.10                            | 0.15 ± 0.11                             |
|                                  | ba   | -0.04 ± 0.03                     | -0.02 ± 0.09                          | 0.00 ± 0.07                            | 0.08 ± 0.10                             | -0.24 ± 0.17                            |
|                                  | bad  | -0.22 ± 0.04                     | 0.04 ± 0.09                           | 0.03 ± 0.07                            | 0.22 ± 0.12                             | -0.03 ± 0.12                            |
| C <sub>6</sub> H <sub>14</sub>   | badq | -0.40 ± 0.04                     | 0.02 ± 0.08                           | 0.04 ± 0.07                            | 0.26 ± 0.14                             | -0.07 ± 0.11                            |
|                                  |      | -0.43 ± 0.03                     | -0.07 ± 0.07                          | -0.04 ± 0.06                           | 0.26 ± 0.10                             | -0.32 ± 0.09                            |
|                                  | b    | -0.56 ± 0.04                     | 0.01 ± 0.07                           | 0.01 ± 0.06                            | 0.19 ± 0.09                             | -0.16 ± 0.10                            |
|                                  | ba   | -0.45 ± 0.08                     | -0.11 ± 0.09                          | -0.09 ± 0.09                           | 0.11 ± 0.13                             | -0.38 ± 0.16                            |
|                                  | bad  | -0.47 ± 0.03                     | -0.03 ± 0.06                          | -0.03 ± 0.06                           | 0.14 ± 0.09                             | -0.23 ± 0.07                            |
|                                  | badq | -0.47 ± 0.03                     | 0.07 ± 0.07                           | 0.05 ± 0.06                            | 0.30 ± 0.11                             | -0.20 ± 0.10                            |
| CH <sub>3</sub> OH               |      | -2.16 ± 0.03                     | -0.10 ± 0.08                          | -0.09 ± 0.07                           | 0.21 ± 0.14                             | -0.30 ± 0.11                            |
|                                  | b    | -2.13 ± 0.03                     | 0.05 ± 0.07                           | 0.02 ± 0.08                            | 0.21 ± 0.14                             | -0.22 ± 0.13                            |
|                                  | ba   | -2.13 ± 0.03                     | -0.05 ± 0.08                          | -0.05 ± 0.10                           | 0.10 ± 0.14                             | -0.32 ± 0.22                            |
|                                  | bad  | -1.99 ± 0.04                     | -0.19 ± 0.07                          | -0.20 ± 0.07                           | -0.01 ± 0.14                            | -0.35 ± 0.12                            |
|                                  | badq | -1.99 ± 0.04                     | 0.13 ± 0.09                           | 0.06 ± 0.09                            | 0.35 ± 0.16                             | -0.35 ± 0.16                            |
|                                  |      | 0.05 ± 0.02                      | 0.03 ± 0.04                           | 0.04 ± 0.03                            | 0.05 ± 0.07                             | -0.03 ± 0.04                            |
| C <sub>2</sub> H <sub>6</sub>    | b    | 0.06 ± 0.04                      | -0.07 ± 0.05                          | -0.07 ± 0.05                           | -0.05 ± 0.06                            | -0.06 ± 0.06                            |
|                                  | ba   | 0.09 ± 0.10                      | 0.02 ± 0.10                           | 0.00 ± 0.10                            | -0.01 ± 0.10                            | 0.04 ± 0.10                             |
|                                  | bad  | 0.13 ± 0.12                      | 0.08 ± 0.12                           | 0.07 ± 0.12                            | 0.04 ± 0.13                             | 0.11 ± 0.12                             |
|                                  | badq | 0.07 ± 0.08                      | -0.05 ± 0.09                          | -0.05 ± 0.08                           | -0.04 ± 0.09                            | -0.05 ± 0.09                            |
|                                  |      | -1.97 ± 0.05                     | -0.06 ± 0.10                          | -0.14 ± 0.12                           | 0.79 ± 0.28                             | -1.14 ± 0.29                            |
|                                  | b    | -2.04 ± 0.05                     | -0.13 ± 0.11                          | -0.23 ± 0.13                           | 0.69 ± 0.24                             | -1.02 ± 0.22                            |

Continued on next page



Table 2 – Continued from previous page

| Molec.                            | MM'  | $\Delta G_{\text{TI3}}^{N_i=11}$ | $\Delta\Delta G_{\text{TI}}^{N_i=3}$ | $\Delta\Delta G_{\text{BAR}}^{N_i=3}$ | $\Delta\Delta G_{\text{IEXP}}^{N_i=2}$ | $\Delta\Delta G_{\text{DEXP}}^{N_i=2}$ |
|-----------------------------------|------|----------------------------------|--------------------------------------|---------------------------------------|----------------------------------------|----------------------------------------|
|                                   | ba   | $-2.28 \pm 0.03$                 | $0.10 \pm 0.09$                      | $0.08 \pm 0.08$                       | $0.38 \pm 0.17$                        | $-0.13 \pm 0.16$                       |
|                                   | bad  | $-2.20 \pm 0.03$                 | $-0.08 \pm 0.08$                     | $-0.13 \pm 0.09$                      | $0.08 \pm 0.13$                        | $-0.35 \pm 0.14$                       |
|                                   | badq | $-2.16 \pm 0.03$                 | $0.14 \pm 0.08$                      | $0.11 \pm 0.07$                       | $0.41 \pm 0.13$                        | $-0.23 \pm 0.11$                       |
| $\text{C}(\text{NH}_2)_3^+$       |      | $-0.97 \pm 0.06$                 | $-0.24 \pm 0.14$                     | $-0.20 \pm 0.20$                      | $-0.03 \pm 0.17$                       | $-0.39 \pm 0.39$                       |
|                                   | b    | $-0.24 \pm 0.06$                 | $0.23 \pm 0.13$                      | $0.13 \pm 0.12$                       | $0.87 \pm 0.21$                        | $-0.03 \pm 0.23$                       |
|                                   | ba   | $-0.60 \pm 0.05$                 | $-0.07 \pm 0.09$                     | $-0.12 \pm 0.09$                      | $0.02 \pm 0.26$                        | $-0.22 \pm 0.16$                       |
|                                   | bad  | $-0.36 \pm 0.05$                 | $-0.02 \pm 0.09$                     | $-0.07 \pm 0.09$                      | $0.14 \pm 0.16$                        | $-0.19 \pm 0.16$                       |
|                                   | badq | $-0.02 \pm 0.05$                 | $0.09 \pm 0.10$                      | $0.04 \pm 0.10$                       | $0.34 \pm 0.14$                        | $-0.34 \pm 0.22$                       |
| $\text{C}_6\text{H}_5\text{NH}_2$ |      | $-3.04 \pm 0.04$                 | $0.04 \pm 0.10$                      | $0.07 \pm 0.11$                       | $0.77 \pm 0.18$                        | $-0.66 \pm 0.18$                       |
|                                   | b    | $-3.06 \pm 0.04$                 | $-0.03 \pm 0.09$                     | $-0.00 \pm 0.10$                      | $0.42 \pm 0.18$                        | $-0.36 \pm 0.16$                       |
|                                   | ba   | $-3.09 \pm 0.05$                 | $0.04 \pm 0.09$                      | $0.03 \pm 0.08$                       | $0.25 \pm 0.15$                        | $-0.37 \pm 0.14$                       |
|                                   | bad  | $-3.22 \pm 0.04$                 | $0.13 \pm 0.08$                      | $0.09 \pm 0.07$                       | $0.28 \pm 0.15$                        | $-0.09 \pm 0.09$                       |
|                                   | badq | $-3.26 \pm 0.08$                 | $0.27 \pm 0.15$                      | $0.14 \pm 0.17$                       | $0.46 \pm 0.30$                        | $0.21 \pm 0.37$                        |
| $\text{CH}_3\text{CONH}_2$        |      | $-3.59 \pm 0.05$                 | $0.01 \pm 0.10$                      | $0.09 \pm 0.11$                       | $0.88 \pm 0.15$                        | $-0.35 \pm 0.20$                       |
|                                   | b    | $-3.41 \pm 0.04$                 | $-0.16 \pm 0.10$                     | $-0.05 \pm 0.11$                      | $0.75 \pm 0.30$                        | $-0.88 \pm 0.24$                       |
|                                   | ba   | $-3.52 \pm 0.05$                 | $0.04 \pm 0.10$                      | $0.05 \pm 0.10$                       | $0.59 \pm 0.14$                        | $-0.21 \pm 0.14$                       |
|                                   | bad  | $-3.50 \pm 0.04$                 | $0.26 \pm 0.08$                      | $0.29 \pm 0.09$                       | $0.54 \pm 0.18$                        | $-0.13 \pm 0.24$                       |
|                                   | badq | $-3.59 \pm 0.04$                 | $0.05 \pm 0.07$                      | $0.08 \pm 0.07$                       | $0.36 \pm 0.11$                        | $-0.18 \pm 0.09$                       |
| $\text{H}_2\text{O}$              |      | $-3.62 \pm 0.03$                 | $-0.08 \pm 0.07$                     | $-0.08 \pm 0.08$                      | $-0.16 \pm 0.11$                       | $-0.03 \pm 0.11$                       |
|                                   | b    | $-3.72 \pm 0.03$                 | $-0.01 \pm 0.07$                     | $0.01 \pm 0.09$                       | $-0.12 \pm 0.12$                       | $-0.06 \pm 0.23$                       |
|                                   | ba   | $-3.78 \pm 0.03$                 | $0.07 \pm 0.07$                      | $0.11 \pm 0.09$                       | $0.03 \pm 0.16$                        | $0.12 \pm 0.11$                        |
|                                   | bad  | $-3.79 \pm 0.03$                 | $0.07 \pm 0.07$                      | $0.11 \pm 0.09$                       | $0.03 \pm 0.16$                        | $0.12 \pm 0.11$                        |
|                                   | badq | $-3.72 \pm 0.03$                 | $0.22 \pm 0.07$                      | $0.19 \pm 0.08$                       | $0.21 \pm 0.14$                        | $0.11 \pm 0.11$                        |
| $\text{C}_2\text{H}_5\text{OH}$   |      | $-2.71 \pm 0.04$                 | $0.15 \pm 0.08$                      | $0.15 \pm 0.08$                       | $0.39 \pm 0.14$                        | $-0.09 \pm 0.16$                       |

Continued on next page

Table 2 – *Continued from previous page*

| Molec.                           | MM'  | $\Delta G_{\text{TI3}}^{N_i=11}$ | $\Delta\Delta G_{\text{TI}}^{N_i=3}$ | $\Delta\Delta G_{\text{BAR}}^{N_i=3}$ | $\Delta\Delta G_{\text{IEXP}}^{N_i=2}$ | $\Delta\Delta G_{\text{DEXP}}^{N_i=2}$ |
|----------------------------------|------|----------------------------------|--------------------------------------|---------------------------------------|----------------------------------------|----------------------------------------|
|                                  | b    | $-2.60 \pm 0.04$                 | $0.06 \pm 0.08$                      | $0.07 \pm 0.10$                       | $0.16 \pm 0.20$                        | $-0.05 \pm 0.14$                       |
|                                  | ba   | $-2.72 \pm 0.05$                 | $0.03 \pm 0.09$                      | $-0.02 \pm 0.09$                      | $0.41 \pm 0.14$                        | $-0.31 \pm 0.12$                       |
|                                  | bad  | $-2.79 \pm 0.05$                 | $0.01 \pm 0.09$                      | $-0.04 \pm 0.08$                      | $0.49 \pm 0.16$                        | $-0.42 \pm 0.10$                       |
|                                  | badq | $-2.83 \pm 0.04$                 | $-0.08 \pm 0.08$                     | $-0.08 \pm 0.09$                      | $0.26 \pm 0.13$                        | $-0.53 \pm 0.11$                       |
| C <sub>6</sub> H <sub>6</sub>    |      | $-0.94 \pm 0.02$                 | $0.00 \pm 0.05$                      | $0.00 \pm 0.05$                       | $0.15 \pm 0.08$                        | $-0.26 \pm 0.09$                       |
|                                  | b    | $-0.86 \pm 0.02$                 | $-0.05 \pm 0.05$                     | $-0.07 \pm 0.04$                      | $0.06 \pm 0.08$                        | $-0.28 \pm 0.09$                       |
|                                  | ba   | $-0.70 \pm 0.08$                 | $0.00 \pm 0.09$                      | $0.00 \pm 0.09$                       | $0.03 \pm 0.10$                        | $-0.05 \pm 0.10$                       |
|                                  | bad  | $-0.59 \pm 0.16$                 | $-0.29 \pm 0.17$                     | $-0.23 \pm 0.17$                      | $-0.22 \pm 0.19$                       | $-0.25 \pm 0.19$                       |
|                                  | badq | $-0.67 \pm 0.02$                 | $0.00 \pm 0.05$                      | $0.00 \pm 0.04$                       | $0.00 \pm 0.09$                        | $-0.01 \pm 0.14$                       |
| C <sub>6</sub> H <sub>5</sub> OH |      | $-2.17 \pm 0.03$                 | $-0.02 \pm 0.08$                     | $-0.04 \pm 0.07$                      | $0.38 \pm 0.17$                        | $-0.33 \pm 0.12$                       |
|                                  | b    | $-2.13 \pm 0.04$                 | $0.05 \pm 0.08$                      | $0.04 \pm 0.07$                       | $0.26 \pm 0.16$                        | $-0.22 \pm 0.14$                       |
|                                  | ba   | $-2.26 \pm 0.03$                 | $-0.06 \pm 0.07$                     | $-0.04 \pm 0.07$                      | $0.14 \pm 0.13$                        | $-0.20 \pm 0.16$                       |
|                                  | bad  | $-2.22 \pm 0.03$                 | $0.03 \pm 0.07$                      | $0.05 \pm 0.06$                       | $0.13 \pm 0.12$                        | $0.00 \pm 0.12$                        |
|                                  | badq | $-2.36 \pm 0.06$                 | $-0.09 \pm 0.12$                     | $-0.01 \pm 0.14$                      | $0.05 \pm 0.32$                        | $0.37 \pm 0.24$                        |

Table 3: MM-to-QM net solvation free energy correction values from 6- $\lambda$  states simulated for 200 ps

| Molec.                     | MM'  | $\Delta G_{\text{TI3}}^{N_\lambda=11}$ | $\Delta\Delta G_{\text{TI}}^{N_\lambda=6}$ | $\Delta\Delta G_{\text{BAR}}^{N_\lambda=6}$ | $\Delta\Delta G_{\text{IEXP}}^{N_\lambda=5}$ | $\Delta\Delta G_{\text{DEXP}}^{N_\lambda=5}$ |
|----------------------------|------|----------------------------------------|--------------------------------------------|---------------------------------------------|----------------------------------------------|----------------------------------------------|
| $\text{CO}_3^{2-}$         |      | $-6.45 \pm 0.12$                       | $0.26 \pm 0.18$                            | $0.04 \pm 0.17$                             | $3.53 \pm 0.38$                              | $-3.23 \pm 0.35$                             |
|                            | b    | $-6.47 \pm 0.07$                       | $0.07 \pm 0.09$                            | $0.05 \pm 0.08$                             | $-0.04 \pm 0.12$                             | $0.21 \pm 0.11$                              |
|                            | ba   | $-6.13 \pm 0.06$                       | $-0.03 \pm 0.08$                           | $-0.04 \pm 0.07$                            | $-0.05 \pm 0.11$                             | $0.08 \pm 0.10$                              |
|                            | bad  | $-6.09 \pm 0.06$                       | $-0.20 \pm 0.09$                           | $-0.19 \pm 0.08$                            | $-0.18 \pm 0.11$                             | $-0.14 \pm 0.10$                             |
|                            | badq | $-6.07 \pm 0.06$                       | $0.06 \pm 0.08$                            | $0.07 \pm 0.07$                             | $0.13 \pm 0.13$                              | $0.02 \pm 0.11$                              |
| $\text{CH}_3\text{NH}_3^+$ |      | $1.79 \pm 0.04$                        | $-0.12 \pm 0.07$                           | $-0.13 \pm 0.06$                            | $-0.02 \pm 0.09$                             | $-0.16 \pm 0.08$                             |
|                            | b    | $1.89 \pm 0.03$                        | $0.01 \pm 0.04$                            | $0.01 \pm 0.04$                             | $0.00 \pm 0.04$                              | $0.01 \pm 0.05$                              |
|                            | ba   | $1.89 \pm 0.03$                        | $-0.03 \pm 0.04$                           | $-0.03 \pm 0.04$                            | $-0.04 \pm 0.04$                             | $-0.02 \pm 0.04$                             |
|                            | bad  | $1.79 \pm 0.04$                        | $0.03 \pm 0.04$                            | $0.04 \pm 0.04$                             | $0.08 \pm 0.04$                              | $-0.00 \pm 0.04$                             |
|                            | badq | $1.80 \pm 0.03$                        | $0.06 \pm 0.03$                            | $0.05 \pm 0.03$                             | $0.07 \pm 0.04$                              | $0.03 \pm 0.04$                              |
| $\text{NH}_4^+$            |      | $5.64 \pm 0.04$                        | $0.01 \pm 0.05$                            | $0.01 \pm 0.04$                             | $0.02 \pm 0.07$                              | $0.01 \pm 0.06$                              |
|                            | b    | $5.69 \pm 0.02$                        | $0.01 \pm 0.02$                            | $0.01 \pm 0.02$                             | $0.01 \pm 0.02$                              | $0.01 \pm 0.02$                              |
|                            | ba   | $5.68 \pm 0.01$                        | $-0.00 \pm 0.01$                           | $0.01 \pm 0.01$                             | $0.01 \pm 0.01$                              | $-0.00 \pm 0.01$                             |
|                            | bad  | $5.68 \pm 0.01$                        | $-0.00 \pm 0.01$                           | $0.01 \pm 0.01$                             | $0.01 \pm 0.01$                              | $-0.00 \pm 0.01$                             |
|                            | badq | $5.70 \pm 0.02$                        | $0.00 \pm 0.02$                            | $0.00 \pm 0.02$                             | $0.00 \pm 0.02$                              | $-0.01 \pm 0.02$                             |
| $\text{CH}_3\text{CO}_2^-$ |      | $-9.33 \pm 0.08$                       | $0.16 \pm 0.11$                            | $0.11 \pm 0.10$                             | $0.56 \pm 0.20$                              | $-0.17 \pm 0.16$                             |
|                            | b    | $-9.52 \pm 0.07$                       | $0.05 \pm 0.09$                            | $0.01 \pm 0.08$                             | $0.29 \pm 0.13$                              | $-0.19 \pm 0.11$                             |
|                            | ba   | $-9.29 \pm 0.05$                       | $-0.09 \pm 0.07$                           | $-0.07 \pm 0.07$                            | $-0.04 \pm 0.09$                             | $-0.10 \pm 0.09$                             |
|                            | bad  | $-9.14 \pm 0.05$                       | $0.04 \pm 0.07$                            | $0.03 \pm 0.06$                             | $0.16 \pm 0.09$                              | $-0.08 \pm 0.09$                             |
|                            | badq | $-9.27 \pm 0.07$                       | $0.22 \pm 0.08$                            | $0.21 \pm 0.10$                             | $0.18 \pm 0.16$                              | $0.24 \pm 0.16$                              |
| $\text{H}_3\text{O}^+$     |      | $6.51 \pm 0.05$                        | $-0.00 \pm 0.08$                           | $-0.01 \pm 0.06$                            | $0.25 \pm 0.10$                              | $-0.26 \pm 0.09$                             |
|                            | b    | $6.42 \pm 0.04$                        | $-0.01 \pm 0.06$                           | $-0.01 \pm 0.05$                            | $0.20 \pm 0.08$                              | $-0.15 \pm 0.09$                             |
|                            | ba   | $6.35 \pm 0.02$                        | $-0.04 \pm 0.03$                           | $-0.04 \pm 0.02$                            | $-0.01 \pm 0.03$                             | $-0.06 \pm 0.03$                             |

*Continued on next page*

Table 3 – Continued from previous page

| Molec.                           | MM'  | $\Delta G_{\text{TI3}}^{N_i=11}$ | $\Delta \Delta G_{\text{TI}}^{N_i=6}$ | $\Delta \Delta G_{\text{BAR}}^{N_i=6}$ | $\Delta \Delta G_{\text{IEXP}}^{N_i=5}$ | $\Delta \Delta G_{\text{DEXP}}^{N_i=5}$ |
|----------------------------------|------|----------------------------------|---------------------------------------|----------------------------------------|-----------------------------------------|-----------------------------------------|
| C <sub>6</sub> H <sub>5</sub> Cl | bad  | 6.35 ± 0.02                      | -0.04 ± 0.03                          | -0.04 ± 0.02                           | -0.01 ± 0.03                            | -0.06 ± 0.03                            |
|                                  | badq | 6.41 ± 0.02                      | 0.02 ± 0.03                           | 0.02 ± 0.02                            | 0.03 ± 0.03                             | 0.02 ± 0.03                             |
|                                  |      | 0.38 ± 0.04                      | 0.07 ± 0.05                           | 0.07 ± 0.04                            | 0.09 ± 0.07                             | 0.05 ± 0.07                             |
|                                  | b    | 0.55 ± 0.04                      | 0.05 ± 0.05                           | 0.04 ± 0.05                            | 0.01 ± 0.08                             | 0.08 ± 0.08                             |
|                                  | ba   | -0.04 ± 0.03                     | 0.07 ± 0.05                           | 0.06 ± 0.05                            | 0.07 ± 0.06                             | 0.05 ± 0.07                             |
|                                  | bad  | -0.22 ± 0.04                     | 0.05 ± 0.06                           | 0.05 ± 0.05                            | 0.08 ± 0.07                             | 0.03 ± 0.07                             |
| C <sub>6</sub> H <sub>14</sub>   | badq | -0.40 ± 0.04                     | -0.01 ± 0.05                          | 0.01 ± 0.04                            | 0.05 ± 0.06                             | -0.03 ± 0.06                            |
|                                  |      | -0.43 ± 0.03                     | 0.10 ± 0.04                           | 0.09 ± 0.04                            | 0.22 ± 0.05                             | -0.03 ± 0.05                            |
|                                  | b    | -0.56 ± 0.04                     | 0.04 ± 0.05                           | 0.04 ± 0.04                            | 0.11 ± 0.06                             | -0.03 ± 0.06                            |
|                                  | ba   | -0.45 ± 0.08                     | 0.01 ± 0.08                           | 0.02 ± 0.08                            | 0.12 ± 0.09                             | -0.09 ± 0.09                            |
|                                  | bad  | -0.47 ± 0.03                     | -0.09 ± 0.04                          | -0.10 ± 0.04                           | 0.02 ± 0.07                             | -0.24 ± 0.08                            |
|                                  | badq | -0.47 ± 0.03                     | -0.04 ± 0.04                          | -0.04 ± 0.03                           | 0.07 ± 0.05                             | -0.15 ± 0.05                            |
| CH <sub>3</sub> OH               |      | -2.16 ± 0.03                     | -0.01 ± 0.05                          | -0.00 ± 0.05                           | 0.10 ± 0.08                             | -0.10 ± 0.07                            |
|                                  | b    | -2.13 ± 0.03                     | 0.04 ± 0.05                           | 0.02 ± 0.05                            | 0.09 ± 0.08                             | -0.04 ± 0.07                            |
|                                  | ba   | -2.13 ± 0.03                     | -0.08 ± 0.05                          | -0.09 ± 0.05                           | -0.01 ± 0.08                            | -0.17 ± 0.09                            |
|                                  | bad  | -1.99 ± 0.04                     | 0.05 ± 0.05                           | 0.04 ± 0.05                            | 0.10 ± 0.08                             | -0.02 ± 0.07                            |
|                                  | badq | -1.99 ± 0.04                     | 0.00 ± 0.06                           | -0.02 ± 0.06                           | 0.08 ± 0.08                             | -0.15 ± 0.08                            |
|                                  |      | 0.05 ± 0.02                      | -0.01 ± 0.02                          | -0.01 ± 0.02                           | 0.00 ± 0.04                             | -0.03 ± 0.03                            |
| C <sub>2</sub> H <sub>6</sub>    | b    | 0.06 ± 0.04                      | -0.01 ± 0.05                          | -0.01 ± 0.05                           | -0.01 ± 0.05                            | -0.01 ± 0.05                            |
|                                  | ba   | 0.09 ± 0.10                      | -0.01 ± 0.10                          | -0.01 ± 0.10                           | -0.03 ± 0.10                            | -0.01 ± 0.10                            |
|                                  | bad  | 0.13 ± 0.12                      | 0.02 ± 0.12                           | 0.02 ± 0.12                            | -0.01 ± 0.12                            | 0.03 ± 0.12                             |
|                                  | badq | 0.07 ± 0.08                      | 0.02 ± 0.08                           | 0.02 ± 0.08                            | 0.01 ± 0.08                             | 0.03 ± 0.08                             |
|                                  |      | -1.97 ± 0.05                     | 0.04 ± 0.07                           | 0.02 ± 0.06                            | 0.38 ± 0.10                             | -0.36 ± 0.11                            |
|                                  | b    | -2.04 ± 0.05                     | -0.10 ± 0.08                          | -0.11 ± 0.07                           | 0.21 ± 0.10                             | -0.45 ± 0.11                            |

Continued on next page

Table 3 – Continued from previous page

| Molec.                            | MM'  | $\Delta G_{\text{TI3}}^{N_i=11}$ | $\Delta\Delta G_{\text{TI}}^{N_i=6}$ | $\Delta\Delta G_{\text{BAR}}^{N_i=6}$ | $\Delta\Delta G_{\text{IEXP}}^{N_i=5}$ | $\Delta\Delta G_{\text{DEXP}}^{N_i=5}$ |
|-----------------------------------|------|----------------------------------|--------------------------------------|---------------------------------------|----------------------------------------|----------------------------------------|
|                                   | ba   | $-2.28 \pm 0.03$                 | $0.02 \pm 0.05$                      | $0.01 \pm 0.05$                       | $0.07 \pm 0.07$                        | $-0.03 \pm 0.07$                       |
|                                   | bad  | $-2.20 \pm 0.03$                 | $-0.10 \pm 0.05$                     | $-0.11 \pm 0.05$                      | $-0.01 \pm 0.07$                       | $-0.20 \pm 0.08$                       |
|                                   | badq | $-2.16 \pm 0.03$                 | $0.04 \pm 0.05$                      | $0.04 \pm 0.04$                       | $0.15 \pm 0.06$                        | $-0.07 \pm 0.06$                       |
| $\text{C}(\text{NH}_2)_3^+$       |      | $-0.97 \pm 0.06$                 | $-0.10 \pm 0.09$                     | $-0.12 \pm 0.10$                      | $0.14 \pm 0.14$                        | $-0.21 \pm 0.19$                       |
|                                   | b    | $-0.24 \pm 0.06$                 | $0.15 \pm 0.09$                      | $0.10 \pm 0.07$                       | $0.30 \pm 0.11$                        | $0.03 \pm 0.11$                        |
|                                   | ba   | $-0.60 \pm 0.05$                 | $-0.07 \pm 0.07$                     | $-0.09 \pm 0.06$                      | $0.05 \pm 0.11$                        | $-0.16 \pm 0.09$                       |
|                                   | bad  | $-0.36 \pm 0.05$                 | $-0.08 \pm 0.06$                     | $-0.09 \pm 0.06$                      | $-0.02 \pm 0.09$                       | $-0.14 \pm 0.09$                       |
|                                   | badq | $-0.02 \pm 0.05$                 | $-0.04 \pm 0.07$                     | $-0.05 \pm 0.07$                      | $0.08 \pm 0.11$                        | $-0.16 \pm 0.11$                       |
| $\text{C}_6\text{H}_5\text{NH}_2$ |      | $-3.04 \pm 0.04$                 | $0.09 \pm 0.06$                      | $0.10 \pm 0.06$                       | $0.31 \pm 0.10$                        | $-0.17 \pm 0.09$                       |
|                                   | b    | $-3.06 \pm 0.04$                 | $-0.02 \pm 0.06$                     | $0.00 \pm 0.05$                       | $0.21 \pm 0.08$                        | $-0.21 \pm 0.08$                       |
|                                   | ba   | $-3.09 \pm 0.05$                 | $0.02 \pm 0.06$                      | $0.01 \pm 0.06$                       | $0.12 \pm 0.09$                        | $-0.11 \pm 0.07$                       |
|                                   | bad  | $-3.22 \pm 0.04$                 | $-0.02 \pm 0.05$                     | $-0.03 \pm 0.05$                      | $0.06 \pm 0.08$                        | $-0.13 \pm 0.07$                       |
|                                   | badq | $-3.26 \pm 0.08$                 | $-0.18 \pm 0.10$                     | $-0.19 \pm 0.09$                      | $0.03 \pm 0.15$                        | $-0.31 \pm 0.14$                       |
| $\text{CH}_3\text{CONH}_2$        |      | $-3.59 \pm 0.05$                 | $-0.04 \pm 0.07$                     | $-0.02 \pm 0.06$                      | $0.22 \pm 0.09$                        | $-0.26 \pm 0.10$                       |
|                                   | b    | $-3.41 \pm 0.04$                 | $0.07 \pm 0.06$                      | $0.08 \pm 0.06$                       | $0.34 \pm 0.10$                        | $-0.13 \pm 0.09$                       |
|                                   | ba   | $-3.52 \pm 0.05$                 | $-0.02 \pm 0.06$                     | $-0.02 \pm 0.06$                      | $0.13 \pm 0.08$                        | $-0.15 \pm 0.08$                       |
|                                   | bad  | $-3.50 \pm 0.04$                 | $0.01 \pm 0.06$                      | $0.03 \pm 0.06$                       | $0.21 \pm 0.08$                        | $-0.20 \pm 0.11$                       |
|                                   | badq | $-3.59 \pm 0.04$                 | $-0.12 \pm 0.06$                     | $-0.10 \pm 0.06$                      | $0.08 \pm 0.08$                        | $-0.28 \pm 0.07$                       |
| $\text{H}_2\text{O}$              |      | $-3.62 \pm 0.03$                 | $-0.07 \pm 0.05$                     | $-0.05 \pm 0.05$                      | $-0.03 \pm 0.08$                       | $-0.07 \pm 0.07$                       |
|                                   | b    | $-3.72 \pm 0.03$                 | $0.02 \pm 0.05$                      | $0.02 \pm 0.05$                       | $0.04 \pm 0.08$                        | $-0.01 \pm 0.07$                       |
|                                   | ba   | $-3.78 \pm 0.03$                 | $0.05 \pm 0.05$                      | $0.06 \pm 0.06$                       | $0.05 \pm 0.09$                        | $0.05 \pm 0.09$                        |
|                                   | bad  | $-3.79 \pm 0.03$                 | $0.05 \pm 0.05$                      | $0.06 \pm 0.06$                       | $0.05 \pm 0.09$                        | $0.05 \pm 0.09$                        |
|                                   | badq | $-3.72 \pm 0.03$                 | $-0.02 \pm 0.05$                     | $-0.01 \pm 0.06$                      | $0.04 \pm 0.09$                        | $-0.09 \pm 0.12$                       |
| $\text{C}_2\text{H}_5\text{OH}$   |      | $-2.71 \pm 0.04$                 | $-0.01 \pm 0.05$                     | $0.01 \pm 0.05$                       | $0.11 \pm 0.07$                        | $-0.10 \pm 0.09$                       |

Continued on next page

Table 3 – Continued from previous page

| Molec.                          | MM'  | $\Delta G_{\text{TI3}}^{N_i=11}$ | $\Delta\Delta G_{\text{TI}}^{N_i=6}$ | $\Delta\Delta G_{\text{BAR}}^{N_i=6}$ | $\Delta\Delta G_{\text{IEXP}}^{N_i=5}$ | $\Delta\Delta G_{\text{DEXP}}^{N_i=5}$ |
|---------------------------------|------|----------------------------------|--------------------------------------|---------------------------------------|----------------------------------------|----------------------------------------|
|                                 | b    | $-2.60 \pm 0.04$                 | $-0.04 \pm 0.05$                     | $-0.03 \pm 0.05$                      | $0.03 \pm 0.08$                        | $-0.08 \pm 0.08$                       |
|                                 | ba   | $-2.72 \pm 0.05$                 | $-0.02 \pm 0.06$                     | $-0.04 \pm 0.06$                      | $0.17 \pm 0.10$                        | $-0.20 \pm 0.09$                       |
|                                 | bad  | $-2.79 \pm 0.05$                 | $-0.04 \pm 0.06$                     | $-0.05 \pm 0.06$                      | $0.11 \pm 0.09$                        | $-0.20 \pm 0.09$                       |
|                                 | badq | $-2.83 \pm 0.04$                 | $0.05 \pm 0.06$                      | $0.05 \pm 0.06$                       | $0.19 \pm 0.08$                        | $-0.14 \pm 0.09$                       |
| $\text{C}_6\text{H}_6$          |      | $-0.94 \pm 0.02$                 | $0.06 \pm 0.03$                      | $0.05 \pm 0.03$                       | $0.12 \pm 0.04$                        | $-0.02 \pm 0.04$                       |
|                                 | b    | $-0.86 \pm 0.02$                 | $-0.01 \pm 0.03$                     | $-0.02 \pm 0.03$                      | $0.01 \pm 0.04$                        | $-0.06 \pm 0.04$                       |
|                                 | ba   | $-0.70 \pm 0.08$                 | $0.02 \pm 0.09$                      | $0.02 \pm 0.09$                       | $0.04 \pm 0.09$                        | $0.00 \pm 0.09$                        |
|                                 | bad  | $-0.59 \pm 0.16$                 | $-0.01 \pm 0.16$                     | $-0.01 \pm 0.16$                      | $-0.01 \pm 0.16$                       | $-0.02 \pm 0.16$                       |
|                                 | badq | $-0.67 \pm 0.02$                 | $-0.00 \pm 0.03$                     | $-0.01 \pm 0.02$                      | $0.00 \pm 0.04$                        | $-0.02 \pm 0.03$                       |
| $\text{C}_6\text{H}_5\text{OH}$ |      | $-2.17 \pm 0.03$                 | $0.07 \pm 0.05$                      | $0.05 \pm 0.05$                       | $0.18 \pm 0.08$                        | $-0.06 \pm 0.07$                       |
|                                 | b    | $-2.13 \pm 0.04$                 | $0.00 \pm 0.05$                      | $0.00 \pm 0.05$                       | $0.14 \pm 0.07$                        | $-0.14 \pm 0.07$                       |
|                                 | ba   | $-2.26 \pm 0.03$                 | $-0.01 \pm 0.05$                     | $-0.00 \pm 0.04$                      | $0.09 \pm 0.06$                        | $-0.07 \pm 0.06$                       |
|                                 | bad  | $-2.22 \pm 0.03$                 | $-0.04 \pm 0.05$                     | $-0.04 \pm 0.04$                      | $0.02 \pm 0.06$                        | $-0.08 \pm 0.06$                       |
|                                 | badq | $-2.36 \pm 0.06$                 | $-0.04 \pm 0.09$                     | $-0.04 \pm 0.09$                      | $0.12 \pm 0.14$                        | $-0.10 \pm 0.13$                       |

Table 4: MM-to-QM net solvation free energy correction values from 2- $\lambda$  states simulated for 100 ps

| Molec.                     | MM'  | $\Delta G_{\text{TI3}}^{N_\lambda=11}$ | $\Delta\Delta G_{\text{TI}}^{N_\lambda=2}$ | $\Delta\Delta G_{\text{BAR}}^{N_\lambda=2}$ | $\Delta\Delta G_{\text{IEXP}}^{N_\lambda=1}$ | $\Delta\Delta G_{\text{DEXP}}^{N_\lambda=1}$ |
|----------------------------|------|----------------------------------------|--------------------------------------------|---------------------------------------------|----------------------------------------------|----------------------------------------------|
| $\text{CO}_3^{2-}$         |      | $-6.45 \pm 0.12$                       | $1.99 \pm 0.58$                            | $-3.86 \pm 0.77$                            | $2.33 \pm 0.39$                              | $-10.05 \pm 0.65$                            |
|                            | b    | $-6.47 \pm 0.07$                       | $1.56 \pm 0.24$                            | $0.56 \pm 0.47$                             | $-1.10 \pm 0.45$                             | $1.98 \pm 0.46$                              |
|                            | ba   | $-6.13 \pm 0.06$                       | $0.50 \pm 0.19$                            | $0.06 \pm 0.38$                             | $-0.84 \pm 0.31$                             | $0.99 \pm 0.46$                              |
|                            | bad  | $-6.09 \pm 0.06$                       | $0.64 \pm 0.19$                            | $-0.24 \pm 0.32$                            | $-0.81 \pm 0.46$                             | $1.03 \pm 0.26$                              |
|                            | badq | $-6.07 \pm 0.06$                       | $0.39 \pm 0.18$                            | $-0.22 \pm 0.25$                            | $-0.78 \pm 0.47$                             | $0.98 \pm 0.26$                              |
| $\text{CH}_3\text{NH}_3^+$ |      | $1.79 \pm 0.04$                        | $0.44 \pm 0.17$                            | $0.06 \pm 0.22$                             | $-0.33 \pm 0.30$                             | $0.28 \pm 0.27$                              |
|                            | b    | $1.89 \pm 0.03$                        | $-0.02 \pm 0.09$                           | $-0.02 \pm 0.14$                            | $-0.07 \pm 0.24$                             | $0.14 \pm 0.19$                              |
|                            | ba   | $1.89 \pm 0.03$                        | $-0.14 \pm 0.07$                           | $-0.14 \pm 0.08$                            | $0.01 \pm 0.13$                              | $-0.11 \pm 0.09$                             |
|                            | bad  | $1.79 \pm 0.04$                        | $0.17 \pm 0.07$                            | $0.15 \pm 0.08$                             | $0.29 \pm 0.12$                              | $0.21 \pm 0.11$                              |
|                            | badq | $1.80 \pm 0.03$                        | $0.15 \pm 0.06$                            | $0.14 \pm 0.07$                             | $0.22 \pm 0.18$                              | $0.13 \pm 0.12$                              |
| $\text{NH}_4^+$            |      | $5.64 \pm 0.04$                        | $0.02 \pm 0.13$                            | $-0.40 \pm 0.22$                            | $-0.36 \pm 0.32$                             | $-1.60 \pm 0.58$                             |
|                            | b    | $5.69 \pm 0.02$                        | $-0.05 \pm 0.03$                           | $-0.05 \pm 0.03$                            | $-0.06 \pm 0.04$                             | $-0.06 \pm 0.05$                             |
|                            | ba   | $5.68 \pm 0.01$                        | $-0.01 \pm 0.02$                           | $-0.02 \pm 0.02$                            | $-0.06 \pm 0.04$                             | $0.05 \pm 0.04$                              |
|                            | bad  | $5.68 \pm 0.01$                        | $-0.01 \pm 0.02$                           | $-0.02 \pm 0.02$                            | $-0.06 \pm 0.04$                             | $0.05 \pm 0.04$                              |
|                            | badq | $5.70 \pm 0.02$                        | $0.01 \pm 0.03$                            | $0.01 \pm 0.03$                             | $-0.05 \pm 0.04$                             | $0.07 \pm 0.04$                              |
| $\text{CH}_3\text{CO}_2^-$ |      | $-9.33 \pm 0.08$                       | $0.10 \pm 0.35$                            | $0.66 \pm 0.69$                             | $0.63 \pm 0.62$                              | $1.30 \pm 0.55$                              |
|                            | b    | $-9.52 \pm 0.07$                       | $0.65 \pm 0.21$                            | $0.22 \pm 0.38$                             | $0.12 \pm 0.44$                              | $0.69 \pm 0.37$                              |
|                            | ba   | $-9.29 \pm 0.05$                       | $-0.02 \pm 0.17$                           | $-0.16 \pm 0.28$                            | $-1.17 \pm 0.30$                             | $0.52 \pm 0.26$                              |
|                            | bad  | $-9.14 \pm 0.05$                       | $0.07 \pm 0.18$                            | $-0.24 \pm 0.32$                            | $-1.02 \pm 0.39$                             | $-0.74 \pm 0.59$                             |
|                            | badq | $-9.27 \pm 0.07$                       | $-0.75 \pm 0.22$                           | $-0.50 \pm 0.41$                            | $-1.55 \pm 0.37$                             | $-0.27 \pm 0.43$                             |
| $\text{H}_3\text{O}^+$     |      | $6.51 \pm 0.05$                        | $-0.08 \pm 0.19$                           | $-0.70 \pm 0.39$                            | $-2.03 \pm 0.21$                             | $0.67 \pm 0.38$                              |
|                            | b    | $6.42 \pm 0.04$                        | $-0.11 \pm 0.17$                           | $-0.35 \pm 0.26$                            | $-0.77 \pm 0.26$                             | $-0.38 \pm 0.38$                             |
|                            | ba   | $6.35 \pm 0.02$                        | $-0.16 \pm 0.05$                           | $-0.16 \pm 0.05$                            | $-0.05 \pm 0.08$                             | $-0.28 \pm 0.07$                             |

*Continued on next page*

Table 4 – Continued from previous page

| Molec.                          | MM'  | $\Delta G_{\text{TI3}}^{N_i=11}$ | $\Delta\Delta G_{\text{TI}}^{N_i=2}$ | $\Delta\Delta G_{\text{BAR}}^{N_i=2}$ | $\Delta\Delta G_{\text{IEXP}}^{N_i=1}$ | $\Delta\Delta G_{\text{DEXP}}^{N_i=1}$ |
|---------------------------------|------|----------------------------------|--------------------------------------|---------------------------------------|----------------------------------------|----------------------------------------|
|                                 | bad  | $6.35 \pm 0.02$                  | $-0.16 \pm 0.05$                     | $-0.16 \pm 0.05$                      | $-0.05 \pm 0.08$                       | $-0.28 \pm 0.07$                       |
|                                 | badq | $6.41 \pm 0.02$                  | $-0.11 \pm 0.05$                     | $-0.12 \pm 0.05$                      | $-0.09 \pm 0.07$                       | $-0.18 \pm 0.08$                       |
| $\text{C}_6\text{H}_5\text{Cl}$ |      | $0.38 \pm 0.04$                  | $-0.20 \pm 0.13$                     | $-0.13 \pm 0.14$                      | $-0.31 \pm 0.30$                       | $0.28 \pm 0.19$                        |
|                                 | b    | $0.55 \pm 0.04$                  | $0.21 \pm 0.10$                      | $0.25 \pm 0.11$                       | $-0.14 \pm 0.18$                       | $0.48 \pm 0.18$                        |
|                                 | ba   | $-0.04 \pm 0.03$                 | $0.05 \pm 0.10$                      | $0.06 \pm 0.12$                       | $0.01 \pm 0.14$                        | $-0.40 \pm 0.35$                       |
|                                 | bad  | $-0.22 \pm 0.04$                 | $-0.09 \pm 0.09$                     | $-0.07 \pm 0.10$                      | $-0.13 \pm 0.14$                       | $-0.11 \pm 0.23$                       |
|                                 | badq | $-0.40 \pm 0.04$                 | $-0.07 \pm 0.09$                     | $-0.01 \pm 0.10$                      | $0.25 \pm 0.36$                        | $-0.12 \pm 0.15$                       |
| $\text{C}_6\text{H}_{14}$       |      | $-0.43 \pm 0.03$                 | $-0.31 \pm 0.11$                     | $-0.27 \pm 0.13$                      | $0.28 \pm 0.28$                        | $-0.76 \pm 0.21$                       |
|                                 | b    | $-0.56 \pm 0.04$                 | $-0.02 \pm 0.10$                     | $0.01 \pm 0.14$                       | $0.38 \pm 0.17$                        | $-0.15 \pm 0.15$                       |
|                                 | ba   | $-0.45 \pm 0.08$                 | $-0.19 \pm 0.12$                     | $-0.23 \pm 0.14$                      | $-0.08 \pm 0.19$                       | $-0.31 \pm 0.19$                       |
|                                 | bad  | $-0.47 \pm 0.03$                 | $-0.25 \pm 0.10$                     | $-0.22 \pm 0.11$                      | $-0.04 \pm 0.17$                       | $-0.27 \pm 0.12$                       |
|                                 | badq | $-0.47 \pm 0.03$                 | $0.01 \pm 0.11$                      | $0.08 \pm 0.13$                       | $-0.02 \pm 0.17$                       | $0.15 \pm 0.17$                        |
| $\text{CH}_3\text{OH}$          |      | $-2.16 \pm 0.03$                 | $-0.19 \pm 0.12$                     | $-0.10 \pm 0.30$                      | $0.39 \pm 0.26$                        | $-0.34 \pm 0.38$                       |
|                                 | b    | $-2.13 \pm 0.03$                 | $-0.22 \pm 0.12$                     | $-0.07 \pm 0.18$                      | $0.37 \pm 0.24$                        | $-0.99 \pm 0.30$                       |
|                                 | ba   | $-2.13 \pm 0.03$                 | $-0.05 \pm 0.11$                     | $0.11 \pm 0.23$                       | $0.29 \pm 0.24$                        | $0.18 \pm 0.24$                        |
|                                 | bad  | $-1.99 \pm 0.04$                 | $-0.04 \pm 0.12$                     | $0.11 \pm 0.22$                       | $0.26 \pm 0.30$                        | $-0.32 \pm 0.32$                       |
|                                 | badq | $-1.99 \pm 0.04$                 | $-0.13 \pm 0.12$                     | $-0.08 \pm 0.19$                      | $0.62 \pm 0.36$                        | $-0.61 \pm 0.25$                       |
| $\text{C}_2\text{H}_6$          |      | $0.05 \pm 0.02$                  | $0.04 \pm 0.09$                      | $0.08 \pm 0.07$                       | $0.06 \pm 0.12$                        | $0.02 \pm 0.11$                        |
|                                 | b    | $0.06 \pm 0.04$                  | $-0.09 \pm 0.06$                     | $-0.07 \pm 0.07$                      | $-0.11 \pm 0.09$                       | $-0.17 \pm 0.24$                       |
|                                 | ba   | $0.09 \pm 0.10$                  | $-0.07 \pm 0.11$                     | $-0.06 \pm 0.11$                      | $-0.10 \pm 0.13$                       | $0.04 \pm 0.12$                        |
|                                 | bad  | $0.13 \pm 0.12$                  | $-0.16 \pm 0.13$                     | $-0.13 \pm 0.13$                      | $-0.09 \pm 0.16$                       | $-0.30 \pm 0.18$                       |
|                                 | badq | $0.07 \pm 0.08$                  | $-0.09 \pm 0.09$                     | $-0.08 \pm 0.09$                      | $-0.09 \pm 0.14$                       | $-0.03 \pm 0.11$                       |
| $(\text{CH}_2)_4\text{O}$       |      | $-1.97 \pm 0.05$                 | $-0.50 \pm 0.17$                     | $-0.67 \pm 0.29$                      | $0.18 \pm 0.33$                        | $-1.11 \pm 0.28$                       |
|                                 | b    | $-2.04 \pm 0.05$                 | $-0.24 \pm 0.18$                     | $0.00 \pm 0.40$                       | $0.22 \pm 0.28$                        | $-0.66 \pm 0.42$                       |

Continued on next page



Table 4 – Continued from previous page

| Molec.                            | MM'                             | $\Delta G_{\text{TI3}}^{N_i=11}$ | $\Delta\Delta G_{\text{TI}}^{N_i=2}$ | $\Delta\Delta G_{\text{BAR}}^{N_i=2}$ | $\Delta\Delta G_{\text{IEXP}}^{N_i=1}$ | $\Delta\Delta G_{\text{DEXP}}^{N_i=1}$ |
|-----------------------------------|---------------------------------|----------------------------------|--------------------------------------|---------------------------------------|----------------------------------------|----------------------------------------|
| $\text{C}(\text{NH}_2)_3^+$       | ba                              | $-2.28 \pm 0.03$                 | $-0.01 \pm 0.12$                     | $0.22 \pm 0.24$                       | $0.73 \pm 0.45$                        | $-0.60 \pm 0.54$                       |
|                                   | bad                             | $-2.20 \pm 0.03$                 | $-0.31 \pm 0.13$                     | $-0.29 \pm 0.20$                      | $0.78 \pm 0.36$                        | $-0.62 \pm 0.36$                       |
|                                   | badq                            | $-2.16 \pm 0.03$                 | $0.06 \pm 0.14$                      | $0.04 \pm 0.16$                       | $0.42 \pm 0.36$                        | $-0.26 \pm 0.22$                       |
|                                   | b                               | $-0.97 \pm 0.06$                 | $0.11 \pm 0.41$                      | $-0.20 \pm 0.32$                      | $0.24 \pm 0.50$                        | $0.01 \pm 0.51$                        |
|                                   | ba                              | $-0.24 \pm 0.06$                 | $-1.20 \pm 0.36$                     | $-0.04 \pm 0.31$                      | $0.56 \pm 0.28$                        | $0.44 \pm 0.49$                        |
|                                   | bad                             | $-0.60 \pm 0.05$                 | $-0.80 \pm 0.30$                     | $-0.03 \pm 0.24$                      | $0.56 \pm 0.32$                        | $0.31 \pm 0.31$                        |
| $\text{C}_6\text{H}_5\text{NH}_2$ | bad                             | $-0.36 \pm 0.05$                 | $0.06 \pm 0.21$                      | $-0.09 \pm 0.23$                      | $0.62 \pm 0.38$                        | $0.20 \pm 0.29$                        |
|                                   | badq                            | $-0.02 \pm 0.05$                 | $-0.15 \pm 0.20$                     | $0.01 \pm 0.21$                       | $0.31 \pm 0.29$                        | $-1.08 \pm 0.57$                       |
|                                   | b                               | $-3.04 \pm 0.04$                 | $0.38 \pm 0.15$                      | $0.13 \pm 0.23$                       | $0.44 \pm 0.35$                        | $-0.60 \pm 0.26$                       |
|                                   | ba                              | $-3.06 \pm 0.04$                 | $0.16 \pm 0.15$                      | $-0.13 \pm 0.19$                      | $0.40 \pm 0.30$                        | $-2.20 \pm 0.50$                       |
|                                   | bad                             | $-3.09 \pm 0.05$                 | $0.01 \pm 0.11$                      | $-0.22 \pm 0.18$                      | $-0.14 \pm 0.22$                       | $-1.09 \pm 0.33$                       |
|                                   | badq                            | $-3.22 \pm 0.04$                 | $0.35 \pm 0.13$                      | $-0.07 \pm 0.17$                      | $0.01 \pm 0.16$                        | $-0.61 \pm 0.29$                       |
| $\text{CH}_3\text{CONH}_2$        | badq                            | $-3.26 \pm 0.08$                 | $-0.37 \pm 0.24$                     | $-0.27 \pm 0.62$                      | $-2.10 \pm 0.52$                       | $1.51 \pm 0.44$                        |
|                                   | b                               | $-3.59 \pm 0.05$                 | $-0.25 \pm 0.16$                     | $-0.09 \pm 0.28$                      | $0.71 \pm 0.40$                        | $-1.06 \pm 0.44$                       |
|                                   | ba                              | $-3.41 \pm 0.04$                 | $-0.12 \pm 0.15$                     | $-0.17 \pm 0.22$                      | $0.96 \pm 0.46$                        | $-0.69 \pm 0.29$                       |
|                                   | bad                             | $-3.52 \pm 0.05$                 | $0.21 \pm 0.13$                      | $0.31 \pm 0.24$                       | $0.11 \pm 0.27$                        | $0.73 \pm 0.22$                        |
|                                   | bad                             | $-3.50 \pm 0.04$                 | $-0.02 \pm 0.12$                     | $0.01 \pm 0.23$                       | $0.11 \pm 0.27$                        | $0.27 \pm 0.21$                        |
|                                   | badq                            | $-3.59 \pm 0.04$                 | $0.35 \pm 0.11$                      | $0.40 \pm 0.18$                       | $0.32 \pm 0.17$                        | $0.45 \pm 0.29$                        |
| $\text{H}_2\text{O}$              | b                               | $-3.62 \pm 0.03$                 | $-0.05 \pm 0.11$                     | $-0.18 \pm 0.19$                      | $0.06 \pm 0.37$                        | $0.20 \pm 0.18$                        |
|                                   | ba                              | $-3.72 \pm 0.03$                 | $-0.01 \pm 0.10$                     | $-0.08 \pm 0.18$                      | $-0.13 \pm 0.31$                       | $-0.03 \pm 0.29$                       |
|                                   | bad                             | $-3.78 \pm 0.03$                 | $0.17 \pm 0.11$                      | $0.04 \pm 0.19$                       | $-0.01 \pm 0.30$                       | $0.24 \pm 0.22$                        |
|                                   | bad                             | $-3.79 \pm 0.03$                 | $0.17 \pm 0.11$                      | $0.04 \pm 0.19$                       | $-0.01 \pm 0.30$                       | $0.24 \pm 0.22$                        |
|                                   | badq                            | $-3.72 \pm 0.03$                 | $0.14 \pm 0.10$                      | $0.10 \pm 0.20$                       | $-0.05 \pm 0.28$                       | $0.41 \pm 0.23$                        |
|                                   | $\text{C}_2\text{H}_5\text{OH}$ |                                  | $-2.71 \pm 0.04$                     | $-0.09 \pm 0.12$                      | $-0.14 \pm 0.21$                       | $-0.20 \pm 0.32$                       |

Continued on next page

Table 4 – *Continued from previous page*

| Molec.                          | MM'  | $\Delta G_{\text{TI3}}^{N_\lambda=11}$ | $\Delta\Delta G_{\text{TI}}^{N_\lambda=2}$ | $\Delta\Delta G_{\text{BAR}}^{N_\lambda=2}$ | $\Delta\Delta G_{\text{IEXP}}^{N_\lambda=1}$ | $\Delta\Delta G_{\text{DEXP}}^{N_\lambda=1}$ |
|---------------------------------|------|----------------------------------------|--------------------------------------------|---------------------------------------------|----------------------------------------------|----------------------------------------------|
|                                 | b    | $-2.60 \pm 0.04$                       | $-0.14 \pm 0.12$                           | $-0.17 \pm 0.20$                            | $-0.17 \pm 0.54$                             | $0.13 \pm 0.21$                              |
|                                 | ba   | $-2.72 \pm 0.05$                       | $0.28 \pm 0.12$                            | $0.31 \pm 0.24$                             | $0.29 \pm 0.16$                              | $0.22 \pm 0.40$                              |
|                                 | bad  | $-2.79 \pm 0.05$                       | $0.00 \pm 0.13$                            | $-0.08 \pm 0.22$                            | $0.30 \pm 0.50$                              | $-0.29 \pm 0.27$                             |
|                                 | badq | $-2.83 \pm 0.04$                       | $0.07 \pm 0.12$                            | $0.18 \pm 0.24$                             | $0.31 \pm 0.44$                              | $-0.09 \pm 0.24$                             |
| $\text{C}_6\text{H}_6$          |      | $-0.94 \pm 0.02$                       | $0.08 \pm 0.09$                            | $0.07 \pm 0.10$                             | $0.73 \pm 0.14$                              | $-0.76 \pm 0.24$                             |
|                                 | b    | $-0.86 \pm 0.02$                       | $0.18 \pm 0.07$                            | $0.17 \pm 0.08$                             | $0.45 \pm 0.14$                              | $0.08 \pm 0.11$                              |
|                                 | ba   | $-0.70 \pm 0.08$                       | $0.07 \pm 0.11$                            | $0.03 \pm 0.11$                             | $0.53 \pm 0.15$                              | $-0.16 \pm 0.13$                             |
|                                 | bad  | $-0.59 \pm 0.16$                       | $0.25 \pm 0.18$                            | $0.15 \pm 0.18$                             | $0.42 \pm 0.21$                              | $0.01 \pm 0.21$                              |
|                                 | badq | $-0.67 \pm 0.02$                       | $0.06 \pm 0.07$                            | $0.06 \pm 0.08$                             | $0.38 \pm 0.12$                              | $-0.23 \pm 0.14$                             |
| $\text{C}_6\text{H}_5\text{OH}$ |      | $-2.17 \pm 0.03$                       | $-0.13 \pm 0.13$                           | $-0.16 \pm 0.22$                            | $0.90 \pm 0.53$                              | $-0.78 \pm 0.25$                             |
|                                 | b    | $-2.13 \pm 0.04$                       | $-0.15 \pm 0.11$                           | $-0.07 \pm 0.20$                            | $0.39 \pm 0.44$                              | $0.11 \pm 0.28$                              |
|                                 | ba   | $-2.26 \pm 0.03$                       | $-0.12 \pm 0.11$                           | $-0.05 \pm 0.18$                            | $0.12 \pm 0.38$                              | $0.57 \pm 0.17$                              |
|                                 | bad  | $-2.22 \pm 0.03$                       | $-0.42 \pm 0.11$                           | $-0.43 \pm 0.20$                            | $0.13 \pm 0.20$                              | $-1.33 \pm 0.53$                             |
|                                 | badq | $-2.36 \pm 0.06$                       | $-0.59 \pm 0.21$                           | $-0.52 \pm 0.43$                            | $-2.02 \pm 0.35$                             | $0.86 \pm 0.32$                              |

Table 5: MM-to-QM net solvation free energy correction values from 3- $\lambda$  states simulated for 100 ps

| Molec.                     | MM'  | $\Delta G_{\text{TI}3}^{N_\lambda=11}$ | $\Delta\Delta G_{\text{TI}}^{N_\lambda=3}$ | $\Delta\Delta G_{\text{BAR}}^{N_\lambda=3}$ | $\Delta\Delta G_{\text{IEXP}}^{N_\lambda=2}$ | $\Delta\Delta G_{\text{DEXP}}^{N_\lambda=2}$ |
|----------------------------|------|----------------------------------------|--------------------------------------------|---------------------------------------------|----------------------------------------------|----------------------------------------------|
| $\text{CO}_3^{2-}$         |      | $-6.45 \pm 0.12$                       | $0.90 \pm 0.43$                            | $-0.28 \pm 0.75$                            | $2.51 \pm 0.57$                              | $-5.19 \pm 0.63$                             |
|                            | b    | $-6.47 \pm 0.07$                       | $-0.14 \pm 0.20$                           | $-0.15 \pm 0.17$                            | $-0.37 \pm 0.34$                             | $0.14 \pm 0.29$                              |
|                            | ba   | $-6.13 \pm 0.06$                       | $-0.04 \pm 0.16$                           | $-0.07 \pm 0.15$                            | $-0.26 \pm 0.26$                             | $0.02 \pm 0.34$                              |
|                            | bad  | $-6.09 \pm 0.06$                       | $-0.04 \pm 0.16$                           | $-0.08 \pm 0.17$                            | $-0.63 \pm 0.27$                             | $-0.29 \pm 0.33$                             |
|                            | badq | $-6.07 \pm 0.06$                       | $-0.48 \pm 0.18$                           | $-0.46 \pm 0.14$                            | $-0.31 \pm 0.25$                             | $-1.00 \pm 0.40$                             |
| $\text{CH}_3\text{NH}_3^+$ |      | $1.79 \pm 0.04$                        | $0.09 \pm 0.14$                            | $0.08 \pm 0.13$                             | $0.24 \pm 0.36$                              | $0.10 \pm 0.22$                              |
|                            | b    | $1.89 \pm 0.03$                        | $-0.08 \pm 0.09$                           | $-0.07 \pm 0.09$                            | $-0.05 \pm 0.12$                             | $-0.02 \pm 0.14$                             |
|                            | ba   | $1.89 \pm 0.03$                        | $-0.06 \pm 0.07$                           | $-0.07 \pm 0.06$                            | $-0.02 \pm 0.07$                             | $-0.11 \pm 0.08$                             |
|                            | bad  | $1.79 \pm 0.04$                        | $0.02 \pm 0.05$                            | $0.05 \pm 0.07$                             | $0.06 \pm 0.10$                              | $0.07 \pm 0.08$                              |
|                            | badq | $1.80 \pm 0.03$                        | $0.04 \pm 0.05$                            | $0.06 \pm 0.05$                             | $0.05 \pm 0.08$                              | $0.09 \pm 0.07$                              |
| $\text{NH}_4^+$            |      | $5.64 \pm 0.04$                        | $-0.03 \pm 0.11$                           | $-0.13 \pm 0.11$                            | $-0.16 \pm 0.30$                             | $-0.34 \pm 0.45$                             |
|                            | b    | $5.69 \pm 0.02$                        | $-0.01 \pm 0.03$                           | $-0.02 \pm 0.03$                            | $-0.01 \pm 0.03$                             | $-0.02 \pm 0.03$                             |
|                            | ba   | $5.68 \pm 0.01$                        | $-0.01 \pm 0.02$                           | $-0.01 \pm 0.02$                            | $-0.04 \pm 0.03$                             | $0.01 \pm 0.02$                              |
|                            | bad  | $5.68 \pm 0.01$                        | $-0.01 \pm 0.02$                           | $-0.01 \pm 0.02$                            | $-0.04 \pm 0.03$                             | $0.01 \pm 0.02$                              |
|                            | badq | $5.70 \pm 0.02$                        | $-0.01 \pm 0.03$                           | $0.00 \pm 0.03$                             | $-0.03 \pm 0.03$                             | $0.03 \pm 0.03$                              |
| $\text{CH}_3\text{CO}_2^-$ |      | $-9.33 \pm 0.08$                       | $0.23 \pm 0.27$                            | $0.10 \pm 0.27$                             | $0.47 \pm 0.56$                              | $0.47 \pm 0.38$                              |
|                            | b    | $-9.52 \pm 0.07$                       | $0.53 \pm 0.18$                            | $0.44 \pm 0.19$                             | $0.78 \pm 0.49$                              | $0.24 \pm 0.32$                              |
|                            | ba   | $-9.29 \pm 0.05$                       | $0.24 \pm 0.16$                            | $0.15 \pm 0.16$                             | $-0.13 \pm 0.31$                             | $0.24 \pm 0.20$                              |
|                            | bad  | $-9.14 \pm 0.05$                       | $-0.46 \pm 0.15$                           | $-0.45 \pm 0.18$                            | $-0.35 \pm 0.31$                             | $-0.67 \pm 0.38$                             |
|                            | badq | $-9.27 \pm 0.07$                       | $-0.16 \pm 0.17$                           | $-0.19 \pm 0.18$                            | $-0.20 \pm 0.39$                             | $-0.26 \pm 0.35$                             |
| $\text{H}_3\text{O}^+$     |      | $6.51 \pm 0.05$                        | $-0.12 \pm 0.17$                           | $-0.24 \pm 0.18$                            | $-0.51 \pm 0.22$                             | $-0.42 \pm 0.37$                             |
|                            | b    | $6.42 \pm 0.04$                        | $-0.26 \pm 0.18$                           | $-0.27 \pm 0.14$                            | $0.05 \pm 0.21$                              | $-0.80 \pm 0.27$                             |
|                            | ba   | $6.35 \pm 0.02$                        | $-0.09 \pm 0.05$                           | $-0.11 \pm 0.04$                            | $-0.04 \pm 0.06$                             | $-0.16 \pm 0.05$                             |

*Continued on next page*

Table 5 – Continued from previous page

| Molec.                          | MM'  | $\Delta G_{\text{TI3}}^{N_i=11}$ | $\Delta \Delta G_{\text{TI}}^{N_i=3}$ | $\Delta \Delta G_{\text{BAR}}^{N_i=3}$ | $\Delta \Delta G_{\text{IEXP}}^{N_i=2}$ | $\Delta \Delta G_{\text{DEXP}}^{N_i=2}$ |
|---------------------------------|------|----------------------------------|---------------------------------------|----------------------------------------|-----------------------------------------|-----------------------------------------|
|                                 | bad  | $6.35 \pm 0.02$                  | $-0.09 \pm 0.05$                      | $-0.11 \pm 0.04$                       | $-0.04 \pm 0.06$                        | $-0.16 \pm 0.05$                        |
|                                 | badq | $6.41 \pm 0.02$                  | $-0.09 \pm 0.04$                      | $-0.10 \pm 0.04$                       | $-0.08 \pm 0.06$                        | $-0.13 \pm 0.06$                        |
| $\text{C}_6\text{H}_5\text{Cl}$ |      | $0.38 \pm 0.04$                  | $0.26 \pm 0.12$                       | $0.19 \pm 0.09$                        | $0.11 \pm 0.17$                         | $0.11 \pm 0.28$                         |
|                                 | b    | $0.55 \pm 0.04$                  | $0.00 \pm 0.09$                       | $0.03 \pm 0.08$                        | $-0.11 \pm 0.11$                        | $0.16 \pm 0.11$                         |
|                                 | ba   | $-0.04 \pm 0.03$                 | $0.02 \pm 0.10$                       | $0.04 \pm 0.08$                        | $0.17 \pm 0.11$                         | $-0.24 \pm 0.17$                        |
|                                 | bad  | $-0.22 \pm 0.04$                 | $0.05 \pm 0.09$                       | $0.01 \pm 0.07$                        | $0.15 \pm 0.12$                         | $-0.05 \pm 0.12$                        |
|                                 | badq | $-0.40 \pm 0.04$                 | $-0.12 \pm 0.09$                      | $-0.11 \pm 0.08$                       | $0.05 \pm 0.15$                         | $-0.16 \pm 0.11$                        |
| $\text{C}_6\text{H}_{14}$       |      | $-0.43 \pm 0.03$                 | $-0.19 \pm 0.09$                      | $-0.19 \pm 0.08$                       | $0.08 \pm 0.12$                         | $-0.45 \pm 0.13$                        |
|                                 | b    | $-0.56 \pm 0.04$                 | $-0.19 \pm 0.09$                      | $-0.15 \pm 0.08$                       | $0.05 \pm 0.12$                         | $-0.29 \pm 0.12$                        |
|                                 | ba   | $-0.45 \pm 0.08$                 | $-0.09 \pm 0.11$                      | $-0.12 \pm 0.11$                       | $-0.00 \pm 0.15$                        | $-0.20 \pm 0.14$                        |
|                                 | bad  | $-0.47 \pm 0.03$                 | $-0.18 \pm 0.09$                      | $-0.20 \pm 0.07$                       | $-0.07 \pm 0.11$                        | $-0.25 \pm 0.10$                        |
|                                 | badq | $-0.47 \pm 0.03$                 | $0.07 \pm 0.10$                       | $0.08 \pm 0.09$                        | $0.03 \pm 0.10$                         | $0.02 \pm 0.18$                         |
| $\text{CH}_3\text{OH}$          |      | $-2.16 \pm 0.03$                 | $-0.15 \pm 0.11$                      | $-0.18 \pm 0.14$                       | $0.22 \pm 0.22$                         | $-0.37 \pm 0.22$                        |
|                                 | b    | $-2.13 \pm 0.03$                 | $-0.14 \pm 0.11$                      | $-0.16 \pm 0.11$                       | $0.27 \pm 0.20$                         | $-0.52 \pm 0.20$                        |
|                                 | ba   | $-2.13 \pm 0.03$                 | $-0.04 \pm 0.11$                      | $-0.06 \pm 0.12$                       | $0.19 \pm 0.20$                         | $-0.09 \pm 0.16$                        |
|                                 | bad  | $-1.99 \pm 0.04$                 | $0.04 \pm 0.10$                       | $0.03 \pm 0.11$                        | $0.21 \pm 0.20$                         | $-0.05 \pm 0.17$                        |
|                                 | badq | $-1.99 \pm 0.04$                 | $0.30 \pm 0.11$                       | $0.22 \pm 0.11$                        | $0.55 \pm 0.23$                         | $-0.07 \pm 0.18$                        |
| $\text{C}_2\text{H}_6$          |      | $0.05 \pm 0.02$                  | $-0.02 \pm 0.05$                      | $0.00 \pm 0.04$                        | $0.01 \pm 0.07$                         | $-0.02 \pm 0.06$                        |
|                                 | b    | $0.06 \pm 0.04$                  | $-0.09 \pm 0.06$                      | $-0.09 \pm 0.06$                       | $-0.08 \pm 0.07$                        | $-0.12 \pm 0.09$                        |
|                                 | ba   | $0.09 \pm 0.10$                  | $0.00 \pm 0.11$                       | $-0.01 \pm 0.11$                       | $-0.06 \pm 0.11$                        | $0.04 \pm 0.11$                         |
|                                 | bad  | $0.13 \pm 0.12$                  | $-0.03 \pm 0.13$                      | $-0.05 \pm 0.12$                       | $-0.04 \pm 0.13$                        | $-0.06 \pm 0.13$                        |
|                                 | badq | $0.07 \pm 0.08$                  | $-0.07 \pm 0.09$                      | $-0.07 \pm 0.09$                       | $-0.08 \pm 0.09$                        | $-0.04 \pm 0.09$                        |
| $(\text{CH}_2)_4\text{O}$       |      | $-1.97 \pm 0.05$                 | $0.03 \pm 0.17$                       | $-0.11 \pm 0.15$                       | $0.96 \pm 0.34$                         | $-1.18 \pm 0.30$                        |
|                                 | b    | $-2.04 \pm 0.05$                 | $-0.31 \pm 0.18$                      | $-0.27 \pm 0.18$                       | $0.44 \pm 0.36$                         | $-1.05 \pm 0.39$                        |

Continued on next page

Table 5 – Continued from previous page

| Molec.                            | MM'  | $\Delta G_{\text{TI3}}^{N_i=11}$ | $\Delta\Delta G_{\text{TI}}^{N_i=3}$ | $\Delta\Delta G_{\text{BAR}}^{N_i=3}$ | $\Delta\Delta G_{\text{IEXP}}^{N_i=2}$ | $\Delta\Delta G_{\text{DEXP}}^{N_i=2}$ |
|-----------------------------------|------|----------------------------------|--------------------------------------|---------------------------------------|----------------------------------------|----------------------------------------|
|                                   | ba   | $-2.28 \pm 0.03$                 | $-0.04 \pm 0.12$                     | $-0.01 \pm 0.11$                      | $0.20 \pm 0.31$                        | $-0.15 \pm 0.24$                       |
|                                   | bad  | $-2.20 \pm 0.03$                 | $-0.09 \pm 0.13$                     | $-0.13 \pm 0.14$                      | $0.30 \pm 0.22$                        | $-0.47 \pm 0.22$                       |
|                                   | badq | $-2.16 \pm 0.03$                 | $0.09 \pm 0.12$                      | $0.06 \pm 0.10$                       | $0.31 \pm 0.19$                        | $-0.13 \pm 0.14$                       |
| $\text{C}(\text{NH}_2)_3^+$       |      | $-0.97 \pm 0.06$                 | $-0.23 \pm 0.23$                     | $-0.09 \pm 0.24$                      | $0.04 \pm 0.60$                        | $-0.38 \pm 0.40$                       |
|                                   | b    | $-0.24 \pm 0.06$                 | $-0.04 \pm 0.20$                     | $0.17 \pm 0.19$                       | $0.70 \pm 0.29$                        | $0.16 \pm 0.37$                        |
|                                   | ba   | $-0.60 \pm 0.05$                 | $-0.23 \pm 0.16$                     | $-0.13 \pm 0.17$                      | $0.43 \pm 0.20$                        | $-0.20 \pm 0.23$                       |
|                                   | bad  | $-0.36 \pm 0.05$                 | $-0.04 \pm 0.14$                     | $-0.13 \pm 0.13$                      | $0.18 \pm 0.21$                        | $-0.16 \pm 0.18$                       |
|                                   | badq | $-0.02 \pm 0.05$                 | $-0.25 \pm 0.15$                     | $-0.24 \pm 0.13$                      | $-0.01 \pm 0.23$                       | $-0.58 \pm 0.33$                       |
| $\text{C}_6\text{H}_5\text{NH}_2$ |      | $-3.04 \pm 0.04$                 | $0.16 \pm 0.14$                      | $0.21 \pm 0.12$                       | $0.53 \pm 0.16$                        | $-0.48 \pm 0.20$                       |
|                                   | b    | $-3.06 \pm 0.04$                 | $0.14 \pm 0.14$                      | $0.13 \pm 0.13$                       | $0.55 \pm 0.22$                        | $-0.90 \pm 0.28$                       |
|                                   | ba   | $-3.09 \pm 0.05$                 | $-0.28 \pm 0.11$                     | $-0.28 \pm 0.10$                      | $0.04 \pm 0.21$                        | $-0.68 \pm 0.16$                       |
|                                   | bad  | $-3.22 \pm 0.04$                 | $0.16 \pm 0.12$                      | $0.13 \pm 0.11$                       | $0.31 \pm 0.16$                        | $-0.34 \pm 0.17$                       |
|                                   | badq | $-3.26 \pm 0.08$                 | $0.85 \pm 0.21$                      | $0.80 \pm 0.23$                       | $0.31 \pm 0.38$                        | $0.86 \pm 0.31$                        |
| $\text{CH}_3\text{CONH}_2$        |      | $-3.59 \pm 0.05$                 | $-0.08 \pm 0.15$                     | $-0.08 \pm 0.13$                      | $0.59 \pm 0.26$                        | $-0.57 \pm 0.22$                       |
|                                   | b    | $-3.41 \pm 0.04$                 | $0.01 \pm 0.12$                      | $-0.02 \pm 0.12$                      | $0.49 \pm 0.22$                        | $-0.48 \pm 0.17$                       |
|                                   | ba   | $-3.52 \pm 0.05$                 | $0.20 \pm 0.13$                      | $0.22 \pm 0.13$                       | $0.28 \pm 0.19$                        | $0.10 \pm 0.17$                        |
|                                   | bad  | $-3.50 \pm 0.04$                 | $-0.10 \pm 0.12$                     | $-0.06 \pm 0.12$                      | $0.13 \pm 0.22$                        | $-0.42 \pm 0.33$                       |
|                                   | badq | $-3.59 \pm 0.04$                 | $-0.14 \pm 0.12$                     | $0.02 \pm 0.10$                       | $0.17 \pm 0.14$                        | $-0.58 \pm 0.27$                       |
| $\text{H}_2\text{O}$              |      | $-3.62 \pm 0.03$                 | $-0.29 \pm 0.12$                     | $-0.28 \pm 0.14$                      | $-0.05 \pm 0.24$                       | $-0.38 \pm 0.19$                       |
|                                   | b    | $-3.72 \pm 0.03$                 | $0.23 \pm 0.10$                      | $0.17 \pm 0.10$                       | $0.20 \pm 0.17$                        | $0.24 \pm 0.15$                        |
|                                   | ba   | $-3.78 \pm 0.03$                 | $0.34 \pm 0.10$                      | $0.28 \pm 0.10$                       | $0.38 \pm 0.19$                        | $0.24 \pm 0.15$                        |
|                                   | bad  | $-3.79 \pm 0.03$                 | $0.34 \pm 0.10$                      | $0.28 \pm 0.10$                       | $0.38 \pm 0.19$                        | $0.24 \pm 0.15$                        |
|                                   | badq | $-3.72 \pm 0.03$                 | $-0.01 \pm 0.10$                     | $0.01 \pm 0.12$                       | $0.09 \pm 0.21$                        | $0.03 \pm 0.25$                        |
| $\text{C}_2\text{H}_5\text{OH}$   |      | $-2.71 \pm 0.04$                 | $0.15 \pm 0.11$                      | $0.09 \pm 0.12$                       | $0.09 \pm 0.19$                        | $0.12 \pm 0.16$                        |

Continued on next page

Table 5 – Continued from previous page

| Molec.                          | MM'  | $\Delta G_{\text{TI3}}^{N_i=11}$ | $\Delta\Delta G_{\text{TI}}^{N_i=3}$ | $\Delta\Delta G_{\text{BAR}}^{N_i=3}$ | $\Delta\Delta G_{\text{IEXP}}^{N_i=2}$ | $\Delta\Delta G_{\text{DEXP}}^{N_i=2}$ |
|---------------------------------|------|----------------------------------|--------------------------------------|---------------------------------------|----------------------------------------|----------------------------------------|
|                                 | b    | $-2.60 \pm 0.04$                 | $-0.13 \pm 0.11$                     | $-0.13 \pm 0.11$                      | $-0.14 \pm 0.31$                       | $-0.10 \pm 0.17$                       |
|                                 | ba   | $-2.72 \pm 0.05$                 | $0.08 \pm 0.12$                      | $0.11 \pm 0.12$                       | $0.17 \pm 0.15$                        | $0.12 \pm 0.17$                        |
|                                 | bad  | $-2.79 \pm 0.05$                 | $0.01 \pm 0.13$                      | $-0.04 \pm 0.13$                      | $0.36 \pm 0.24$                        | $-0.38 \pm 0.17$                       |
|                                 | badq | $-2.83 \pm 0.04$                 | $-0.07 \pm 0.12$                     | $-0.06 \pm 0.13$                      | $0.21 \pm 0.23$                        | $-0.22 \pm 0.15$                       |
| $\text{C}_6\text{H}_6$          |      | $-0.94 \pm 0.02$                 | $0.02 \pm 0.07$                      | $0.02 \pm 0.07$                       | $0.40 \pm 0.10$                        | $-0.28 \pm 0.11$                       |
|                                 | b    | $-0.86 \pm 0.02$                 | $0.03 \pm 0.06$                      | $0.07 \pm 0.05$                       | $0.17 \pm 0.08$                        | $0.01 \pm 0.07$                        |
|                                 | ba   | $-0.70 \pm 0.08$                 | $0.13 \pm 0.10$                      | $0.11 \pm 0.09$                       | $0.29 \pm 0.11$                        | $-0.01 \pm 0.11$                       |
|                                 | bad  | $-0.59 \pm 0.16$                 | $-0.43 \pm 0.18$                     | $-0.32 \pm 0.17$                      | $-0.20 \pm 0.21$                       | $-0.40 \pm 0.18$                       |
|                                 | badq | $-0.67 \pm 0.02$                 | $-0.10 \pm 0.07$                     | $-0.06 \pm 0.06$                      | $0.02 \pm 0.08$                        | $-0.16 \pm 0.09$                       |
| $\text{C}_6\text{H}_5\text{OH}$ |      | $-2.17 \pm 0.03$                 | $-0.24 \pm 0.13$                     | $-0.24 \pm 0.12$                      | $0.34 \pm 0.37$                        | $-0.60 \pm 0.15$                       |
|                                 | b    | $-2.13 \pm 0.04$                 | $-0.10 \pm 0.11$                     | $-0.10 \pm 0.11$                      | $0.04 \pm 0.26$                        | $-0.05 \pm 0.15$                       |
|                                 | ba   | $-2.26 \pm 0.03$                 | $0.27 \pm 0.10$                      | $0.17 \pm 0.10$                       | $0.27 \pm 0.23$                        | $0.30 \pm 0.11$                        |
|                                 | bad  | $-2.22 \pm 0.03$                 | $-0.12 \pm 0.10$                     | $-0.18 \pm 0.10$                      | $-0.06 \pm 0.14$                       | $-0.40 \pm 0.27$                       |
|                                 | badq | $-2.36 \pm 0.06$                 | $0.57 \pm 0.19$                      | $0.41 \pm 0.22$                       | $0.76 \pm 0.54$                        | $0.36 \pm 0.38$                        |

Table 6: MM-to-QM net solvation free energy correction values from 6- $\lambda$  states simulated for 100 ps

| Molec.                     | MM'  | $\Delta G_{\text{TI3}}^{N_\lambda=11}$ | $\Delta\Delta G_{\text{TI}}^{N_\lambda=6}$ | $\Delta\Delta G_{\text{BAR}}^{N_\lambda=6}$ | $\Delta\Delta G_{\text{IEXP}}^{N_\lambda=5}$ | $\Delta\Delta G_{\text{DEXP}}^{N_\lambda=5}$ |
|----------------------------|------|----------------------------------------|--------------------------------------------|---------------------------------------------|----------------------------------------------|----------------------------------------------|
| $\text{CO}_3^{2-}$         |      | $-6.45 \pm 0.12$                       | $-0.17 \pm 0.27$                           | $-0.35 \pm 0.26$                            | $1.72 \pm 0.40$                              | $-2.68 \pm 0.43$                             |
|                            | b    | $-6.47 \pm 0.07$                       | $0.25 \pm 0.13$                            | $0.21 \pm 0.11$                             | $0.27 \pm 0.23$                              | $0.25 \pm 0.16$                              |
|                            | ba   | $-6.13 \pm 0.06$                       | $-0.10 \pm 0.11$                           | $-0.11 \pm 0.11$                            | $-0.12 \pm 0.15$                             | $-0.10 \pm 0.16$                             |
|                            | bad  | $-6.09 \pm 0.06$                       | $-0.16 \pm 0.12$                           | $-0.16 \pm 0.11$                            | $-0.08 \pm 0.18$                             | $-0.26 \pm 0.17$                             |
|                            | badq | $-6.07 \pm 0.06$                       | $-0.15 \pm 0.11$                           | $-0.15 \pm 0.09$                            | $-0.17 \pm 0.13$                             | $-0.18 \pm 0.13$                             |
| $\text{CH}_3\text{NH}_3^+$ |      | $1.79 \pm 0.04$                        | $0.02 \pm 0.09$                            | $0.03 \pm 0.08$                             | $0.00 \pm 0.14$                              | $0.09 \pm 0.13$                              |
|                            | b    | $1.89 \pm 0.03$                        | $-0.03 \pm 0.05$                           | $-0.03 \pm 0.05$                            | $-0.03 \pm 0.07$                             | $-0.02 \pm 0.07$                             |
|                            | ba   | $1.89 \pm 0.03$                        | $-0.02 \pm 0.05$                           | $-0.03 \pm 0.04$                            | $-0.02 \pm 0.05$                             | $-0.04 \pm 0.05$                             |
|                            | bad  | $1.79 \pm 0.04$                        | $0.01 \pm 0.05$                            | $0.02 \pm 0.04$                             | $0.02 \pm 0.05$                              | $0.02 \pm 0.05$                              |
|                            | badq | $1.80 \pm 0.03$                        | $0.09 \pm 0.04$                            | $0.09 \pm 0.04$                             | $0.07 \pm 0.05$                              | $0.09 \pm 0.05$                              |
| $\text{NH}_4^+$            |      | $5.64 \pm 0.04$                        | $0.01 \pm 0.07$                            | $-0.02 \pm 0.06$                            | $0.02 \pm 0.12$                              | $-0.04 \pm 0.13$                             |
|                            | b    | $5.69 \pm 0.02$                        | $-0.03 \pm 0.02$                           | $-0.03 \pm 0.02$                            | $-0.03 \pm 0.03$                             | $-0.04 \pm 0.03$                             |
|                            | ba   | $5.68 \pm 0.01$                        | $-0.01 \pm 0.02$                           | $-0.01 \pm 0.01$                            | $-0.02 \pm 0.02$                             | $-0.00 \pm 0.02$                             |
|                            | bad  | $5.68 \pm 0.01$                        | $-0.01 \pm 0.02$                           | $-0.01 \pm 0.01$                            | $-0.02 \pm 0.02$                             | $-0.00 \pm 0.02$                             |
|                            | badq | $5.70 \pm 0.02$                        | $0.01 \pm 0.02$                            | $0.01 \pm 0.02$                             | $0.00 \pm 0.03$                              | $0.02 \pm 0.03$                              |
| $\text{CH}_3\text{CO}_2^-$ |      | $-9.33 \pm 0.08$                       | $0.03 \pm 0.17$                            | $0.01 \pm 0.15$                             | $0.23 \pm 0.27$                              | $-0.22 \pm 0.26$                             |
|                            | b    | $-9.52 \pm 0.07$                       | $-0.02 \pm 0.12$                           | $-0.01 \pm 0.11$                            | $0.04 \pm 0.17$                              | $-0.03 \pm 0.15$                             |
|                            | ba   | $-9.29 \pm 0.05$                       | $-0.21 \pm 0.10$                           | $-0.23 \pm 0.10$                            | $-0.23 \pm 0.14$                             | $-0.22 \pm 0.15$                             |
|                            | bad  | $-9.14 \pm 0.05$                       | $-0.10 \pm 0.10$                           | $-0.10 \pm 0.09$                            | $-0.21 \pm 0.13$                             | $-0.02 \pm 0.14$                             |
|                            | badq | $-9.27 \pm 0.07$                       | $-0.38 \pm 0.12$                           | $-0.37 \pm 0.11$                            | $-0.35 \pm 0.18$                             | $-0.35 \pm 0.17$                             |
| $\text{H}_3\text{O}^+$     |      | $6.51 \pm 0.05$                        | $-0.01 \pm 0.12$                           | $-0.01 \pm 0.11$                            | $0.03 \pm 0.16$                              | $-0.24 \pm 0.19$                             |
|                            | b    | $6.42 \pm 0.04$                        | $-0.05 \pm 0.10$                           | $-0.06 \pm 0.08$                            | $-0.07 \pm 0.12$                             | $-0.05 \pm 0.12$                             |
|                            | ba   | $6.35 \pm 0.02$                        | $-0.02 \pm 0.03$                           | $-0.02 \pm 0.03$                            | $0.00 \pm 0.04$                              | $-0.05 \pm 0.04$                             |

*Continued on next page*

Table 6 – Continued from previous page

| Molec.                          | MM'  | $\Delta G_{\text{TI3}}^{N_i=11}$ | $\Delta\Delta G_{\text{TI}}^{N_i=6}$ | $\Delta\Delta G_{\text{BAR}}^{N_i=6}$ | $\Delta\Delta G_{\text{IEXP}}^{N_i=5}$ | $\Delta\Delta G_{\text{DEXP}}^{N_i=5}$ |
|---------------------------------|------|----------------------------------|--------------------------------------|---------------------------------------|----------------------------------------|----------------------------------------|
|                                 | bad  | $6.35 \pm 0.02$                  | $-0.02 \pm 0.03$                     | $-0.02 \pm 0.03$                      | $0.00 \pm 0.04$                        | $-0.05 \pm 0.04$                       |
|                                 | badq | $6.41 \pm 0.02$                  | $-0.04 \pm 0.03$                     | $-0.04 \pm 0.03$                      | $-0.04 \pm 0.04$                       | $-0.06 \pm 0.03$                       |
| $\text{C}_6\text{H}_5\text{Cl}$ |      | $0.38 \pm 0.04$                  | $0.18 \pm 0.08$                      | $0.17 \pm 0.06$                       | $0.15 \pm 0.09$                        | $0.19 \pm 0.10$                        |
|                                 | b    | $0.55 \pm 0.04$                  | $0.13 \pm 0.06$                      | $0.12 \pm 0.06$                       | $0.09 \pm 0.08$                        | $0.15 \pm 0.08$                        |
|                                 | ba   | $-0.04 \pm 0.03$                 | $-0.03 \pm 0.06$                     | $-0.02 \pm 0.05$                      | $0.00 \pm 0.07$                        | $-0.05 \pm 0.08$                       |
|                                 | bad  | $-0.22 \pm 0.04$                 | $0.00 \pm 0.06$                      | $-0.01 \pm 0.05$                      | $0.02 \pm 0.07$                        | $-0.02 \pm 0.07$                       |
|                                 | badq | $-0.40 \pm 0.04$                 | $-0.03 \pm 0.05$                     | $-0.01 \pm 0.05$                      | $0.01 \pm 0.07$                        | $-0.04 \pm 0.07$                       |
| $\text{C}_6\text{H}_{14}$       |      | $-0.43 \pm 0.03$                 | $0.00 \pm 0.06$                      | $-0.02 \pm 0.04$                      | $0.13 \pm 0.07$                        | $-0.17 \pm 0.08$                       |
|                                 | b    | $-0.56 \pm 0.04$                 | $-0.06 \pm 0.07$                     | $-0.06 \pm 0.06$                      | $0.04 \pm 0.09$                        | $-0.15 \pm 0.08$                       |
|                                 | ba   | $-0.45 \pm 0.08$                 | $-0.10 \pm 0.09$                     | $-0.10 \pm 0.08$                      | $-0.08 \pm 0.09$                       | $-0.17 \pm 0.11$                       |
|                                 | bad  | $-0.47 \pm 0.03$                 | $-0.19 \pm 0.06$                     | $-0.19 \pm 0.04$                      | $-0.11 \pm 0.06$                       | $-0.29 \pm 0.07$                       |
|                                 | badq | $-0.47 \pm 0.03$                 | $-0.16 \pm 0.06$                     | $-0.15 \pm 0.04$                      | $-0.12 \pm 0.06$                       | $-0.15 \pm 0.06$                       |
| $\text{CH}_3\text{OH}$          |      | $-2.16 \pm 0.03$                 | $0.08 \pm 0.07$                      | $0.07 \pm 0.07$                       | $0.19 \pm 0.11$                        | $-0.05 \pm 0.11$                       |
|                                 | b    | $-2.13 \pm 0.03$                 | $0.03 \pm 0.07$                      | $0.03 \pm 0.06$                       | $0.12 \pm 0.10$                        | $-0.07 \pm 0.10$                       |
|                                 | ba   | $-2.13 \pm 0.03$                 | $-0.20 \pm 0.08$                     | $-0.19 \pm 0.07$                      | $-0.05 \pm 0.14$                       | $-0.29 \pm 0.13$                       |
|                                 | bad  | $-1.99 \pm 0.04$                 | $0.13 \pm 0.07$                      | $0.13 \pm 0.06$                       | $0.21 \pm 0.10$                        | $0.07 \pm 0.09$                        |
|                                 | badq | $-1.99 \pm 0.04$                 | $-0.18 \pm 0.08$                     | $-0.17 \pm 0.07$                      | $-0.02 \pm 0.12$                       | $-0.28 \pm 0.09$                       |
| $\text{C}_2\text{H}_6$          |      | $0.05 \pm 0.02$                  | $0.00 \pm 0.03$                      | $0.01 \pm 0.03$                       | $0.01 \pm 0.04$                        | $0.01 \pm 0.03$                        |
|                                 | b    | $0.06 \pm 0.04$                  | $-0.02 \pm 0.05$                     | $-0.02 \pm 0.05$                      | $-0.02 \pm 0.06$                       | $-0.02 \pm 0.06$                       |
|                                 | ba   | $0.09 \pm 0.10$                  | $-0.07 \pm 0.10$                     | $-0.06 \pm 0.10$                      | $-0.08 \pm 0.11$                       | $-0.04 \pm 0.10$                       |
|                                 | bad  | $0.13 \pm 0.12$                  | $-0.06 \pm 0.12$                     | $-0.06 \pm 0.12$                      | $-0.05 \pm 0.12$                       | $-0.07 \pm 0.12$                       |
|                                 | badq | $0.07 \pm 0.08$                  | $-0.05 \pm 0.08$                     | $-0.05 \pm 0.08$                      | $-0.06 \pm 0.09$                       | $-0.03 \pm 0.08$                       |
| $(\text{CH}_2)_4\text{O}$       |      | $-1.97 \pm 0.05$                 | $0.13 \pm 0.10$                      | $0.09 \pm 0.08$                       | $0.43 \pm 0.12$                        | $-0.23 \pm 0.12$                       |
|                                 | b    | $-2.04 \pm 0.05$                 | $-0.15 \pm 0.12$                     | $-0.16 \pm 0.09$                      | $0.19 \pm 0.17$                        | $-0.47 \pm 0.14$                       |

Continued on next page



Table 6 – Continued from previous page

| Molec.                            | MM'  | $\Delta G_{\text{TI3}}^{N_i=11}$ | $\Delta \Delta G_{\text{TI}}^{N_i=6}$ | $\Delta \Delta G_{\text{BAR}}^{N_i=6}$ | $\Delta \Delta G_{\text{IEXP}}^{N_i=5}$ | $\Delta \Delta G_{\text{DEXP}}^{N_i=5}$ |
|-----------------------------------|------|----------------------------------|---------------------------------------|----------------------------------------|-----------------------------------------|-----------------------------------------|
|                                   | ba   | $-2.28 \pm 0.03$                 | $0.04 \pm 0.08$                       | $0.06 \pm 0.07$                        | $0.08 \pm 0.12$                         | $0.06 \pm 0.11$                         |
|                                   | bad  | $-2.20 \pm 0.03$                 | $0.12 \pm 0.08$                       | $0.10 \pm 0.07$                        | $0.30 \pm 0.12$                         | $-0.05 \pm 0.10$                        |
|                                   | badq | $-2.16 \pm 0.03$                 | $0.10 \pm 0.08$                       | $0.10 \pm 0.06$                        | $0.23 \pm 0.10$                         | $0.00 \pm 0.10$                         |
| $\text{C}(\text{NH}_2)_3^+$       |      | $-0.97 \pm 0.06$                 | $-0.18 \pm 0.14$                      | $-0.10 \pm 0.12$                       | $-0.01 \pm 0.18$                        | $-0.20 \pm 0.20$                        |
|                                   | b    | $-0.24 \pm 0.06$                 | $-0.39 \pm 0.12$                      | $-0.33 \pm 0.11$                       | $-0.01 \pm 0.18$                        | $-0.40 \pm 0.18$                        |
|                                   | ba   | $-0.60 \pm 0.05$                 | $-0.17 \pm 0.10$                      | $-0.17 \pm 0.11$                       | $0.10 \pm 0.18$                         | $-0.25 \pm 0.14$                        |
|                                   | bad  | $-0.36 \pm 0.05$                 | $-0.06 \pm 0.08$                      | $-0.10 \pm 0.09$                       | $-0.09 \pm 0.13$                        | $-0.10 \pm 0.13$                        |
|                                   | badq | $-0.02 \pm 0.05$                 | $-0.36 \pm 0.09$                      | $-0.38 \pm 0.08$                       | $-0.32 \pm 0.12$                        | $-0.40 \pm 0.12$                        |
| $\text{C}_6\text{H}_5\text{NH}_2$ |      | $-3.04 \pm 0.04$                 | $0.10 \pm 0.09$                       | $0.10 \pm 0.08$                        | $0.35 \pm 0.12$                         | $-0.18 \pm 0.13$                        |
|                                   | b    | $-3.06 \pm 0.04$                 | $-0.05 \pm 0.08$                      | $-0.04 \pm 0.07$                       | $0.22 \pm 0.11$                         | $-0.35 \pm 0.11$                        |
|                                   | ba   | $-3.09 \pm 0.05$                 | $-0.03 \pm 0.09$                      | $-0.02 \pm 0.06$                       | $0.15 \pm 0.11$                         | $-0.24 \pm 0.10$                        |
|                                   | bad  | $-3.22 \pm 0.04$                 | $0.06 \pm 0.07$                       | $0.07 \pm 0.07$                        | $0.16 \pm 0.10$                         | $-0.10 \pm 0.11$                        |
|                                   | badq | $-3.26 \pm 0.08$                 | $0.27 \pm 0.15$                       | $0.27 \pm 0.17$                        | $0.48 \pm 0.25$                         | $-0.04 \pm 0.28$                        |
| $\text{CH}_3\text{CONH}_2$        |      | $-3.59 \pm 0.05$                 | $0.15 \pm 0.10$                       | $0.13 \pm 0.08$                        | $0.41 \pm 0.16$                         | $-0.16 \pm 0.15$                        |
|                                   | b    | $-3.41 \pm 0.04$                 | $0.11 \pm 0.09$                       | $0.09 \pm 0.08$                        | $0.36 \pm 0.12$                         | $-0.21 \pm 0.12$                        |
|                                   | ba   | $-3.52 \pm 0.05$                 | $0.13 \pm 0.09$                       | $0.14 \pm 0.08$                        | $0.15 \pm 0.11$                         | $0.10 \pm 0.13$                         |
|                                   | bad  | $-3.50 \pm 0.04$                 | $-0.03 \pm 0.08$                      | $-0.02 \pm 0.08$                       | $0.09 \pm 0.12$                         | $-0.14 \pm 0.13$                        |
|                                   | badq | $-3.59 \pm 0.04$                 | $0.01 \pm 0.06$                       | $0.03 \pm 0.06$                        | $0.10 \pm 0.10$                         | $-0.02 \pm 0.09$                        |
| $\text{H}_2\text{O}$              |      | $-3.62 \pm 0.03$                 | $0.09 \pm 0.07$                       | $0.07 \pm 0.07$                        | $0.13 \pm 0.12$                         | $0.01 \pm 0.12$                         |
|                                   | b    | $-3.72 \pm 0.03$                 | $-0.02 \pm 0.07$                      | $-0.01 \pm 0.06$                       | $0.03 \pm 0.09$                         | $-0.05 \pm 0.09$                        |
|                                   | ba   | $-3.78 \pm 0.03$                 | $0.08 \pm 0.07$                       | $0.08 \pm 0.08$                        | $0.12 \pm 0.11$                         | $0.05 \pm 0.11$                         |
|                                   | bad  | $-3.79 \pm 0.03$                 | $0.08 \pm 0.07$                       | $0.08 \pm 0.08$                        | $0.12 \pm 0.11$                         | $0.05 \pm 0.11$                         |
|                                   | badq | $-3.72 \pm 0.03$                 | $-0.17 \pm 0.07$                      | $-0.15 \pm 0.07$                       | $-0.11 \pm 0.11$                        | $-0.20 \pm 0.11$                        |
| $\text{C}_2\text{H}_5\text{OH}$   |      | $-2.71 \pm 0.04$                 | $-0.20 \pm 0.07$                      | $-0.19 \pm 0.07$                       | $-0.18 \pm 0.11$                        | $-0.20 \pm 0.10$                        |

Continued on next page

Table 6 – Continued from previous page

| Molec.                          | MM'  | $\Delta G_{\text{TI3}}^{N_i=11}$ | $\Delta \Delta G_{\text{TI}}^{N_i=6}$ | $\Delta \Delta G_{\text{BAR}}^{N_i=6}$ | $\Delta \Delta G_{\text{IEXP}}^{N_i=5}$ | $\Delta \Delta G_{\text{DEXP}}^{N_i=5}$ |
|---------------------------------|------|----------------------------------|---------------------------------------|----------------------------------------|-----------------------------------------|-----------------------------------------|
|                                 | b    | $-2.60 \pm 0.04$                 | $0.03 \pm 0.07$                       | $0.03 \pm 0.08$                        | $0.03 \pm 0.13$                         | $0.04 \pm 0.11$                         |
|                                 | ba   | $-2.72 \pm 0.05$                 | $-0.05 \pm 0.09$                      | $-0.03 \pm 0.08$                       | $0.10 \pm 0.17$                         | $-0.11 \pm 0.12$                        |
|                                 | bad  | $-2.79 \pm 0.05$                 | $-0.10 \pm 0.08$                      | $-0.10 \pm 0.08$                       | $0.05 \pm 0.15$                         | $-0.21 \pm 0.11$                        |
|                                 | badq | $-2.83 \pm 0.04$                 | $0.29 \pm 0.08$                       | $0.26 \pm 0.07$                        | $0.39 \pm 0.10$                         | $0.14 \pm 0.11$                         |
| $\text{C}_6\text{H}_6$          |      | $-0.94 \pm 0.02$                 | $0.05 \pm 0.05$                       | $0.05 \pm 0.04$                        | $0.18 \pm 0.06$                         | $-0.09 \pm 0.07$                        |
|                                 | b    | $-0.86 \pm 0.02$                 | $0.01 \pm 0.04$                       | $0.03 \pm 0.03$                        | $0.09 \pm 0.05$                         | $-0.03 \pm 0.05$                        |
|                                 | ba   | $-0.70 \pm 0.08$                 | $-0.01 \pm 0.09$                      | $-0.01 \pm 0.09$                       | $0.08 \pm 0.10$                         | $-0.09 \pm 0.10$                        |
|                                 | bad  | $-0.59 \pm 0.16$                 | $-0.01 \pm 0.17$                      | $0.00 \pm 0.16$                        | $0.02 \pm 0.17$                         | $-0.03 \pm 0.17$                        |
|                                 | badq | $-0.67 \pm 0.02$                 | $-0.08 \pm 0.04$                      | $-0.08 \pm 0.03$                       | $-0.03 \pm 0.05$                        | $-0.14 \pm 0.05$                        |
| $\text{C}_6\text{H}_5\text{OH}$ |      | $-2.17 \pm 0.03$                 | $0.10 \pm 0.07$                       | $0.08 \pm 0.07$                        | $0.21 \pm 0.11$                         | $-0.03 \pm 0.09$                        |
|                                 | b    | $-2.13 \pm 0.04$                 | $0.01 \pm 0.07$                       | $0.00 \pm 0.07$                        | $0.05 \pm 0.12$                         | $-0.02 \pm 0.10$                        |
|                                 | ba   | $-2.26 \pm 0.03$                 | $0.16 \pm 0.07$                       | $0.14 \pm 0.06$                        | $0.18 \pm 0.10$                         | $0.13 \pm 0.08$                         |
|                                 | bad  | $-2.22 \pm 0.03$                 | $-0.05 \pm 0.07$                      | $-0.07 \pm 0.06$                       | $-0.02 \pm 0.08$                        | $-0.10 \pm 0.08$                        |
|                                 | badq | $-2.36 \pm 0.06$                 | $-0.31 \pm 0.13$                      | $-0.27 \pm 0.13$                       | $-0.20 \pm 0.22$                        | $-0.47 \pm 0.21$                        |

Table 7: MM-to-QM net solvation free energy correction values from 2- $\lambda$  states simulated for 50 ps

| Molec.                     | MM'  | $\Delta G_{\text{TI3}}^{N_\lambda=11}$ | $\Delta\Delta G_{\text{TI}}^{N_\lambda=2}$ | $\Delta\Delta G_{\text{BAR}}^{N_\lambda=2}$ | $\Delta\Delta G_{\text{IEXP}}^{N_\lambda=1}$ | $\Delta\Delta G_{\text{DEXP}}^{N_\lambda=1}$ |
|----------------------------|------|----------------------------------------|--------------------------------------------|---------------------------------------------|----------------------------------------------|----------------------------------------------|
| $\text{CO}_3^{2-}$         |      | $-6.45 \pm 0.12$                       | $0.12 \pm 0.86$                            | $-1.66 \pm 0.74$                            | $0.91 \pm 0.47$                              | $-4.24 \pm 0.59$                             |
|                            | b    | $-6.47 \pm 0.07$                       | $1.51 \pm 0.36$                            | $0.05 \pm 0.45$                             | $-2.01 \pm 0.26$                             | $2.13 \pm 0.40$                              |
|                            | ba   | $-6.13 \pm 0.06$                       | $1.71 \pm 0.25$                            | $1.25 \pm 0.43$                             | $-1.77 \pm 0.26$                             | $4.16 \pm 0.38$                              |
|                            | bad  | $-6.09 \pm 0.06$                       | $1.05 \pm 0.27$                            | $0.54 \pm 0.40$                             | $-1.70 \pm 0.25$                             | $2.82 \pm 0.35$                              |
|                            | badq | $-6.07 \pm 0.06$                       | $0.27 \pm 0.30$                            | $-0.47 \pm 0.37$                            | $-1.49 \pm 0.23$                             | $-0.24 \pm 0.48$                             |
| $\text{CH}_3\text{NH}_3^+$ |      | $1.79 \pm 0.04$                        | $0.02 \pm 0.22$                            | $-0.09 \pm 0.27$                            | $-0.17 \pm 0.33$                             | $-0.26 \pm 0.41$                             |
|                            | b    | $1.89 \pm 0.03$                        | $-0.11 \pm 0.14$                           | $-0.08 \pm 0.17$                            | $0.43 \pm 0.41$                              | $-0.01 \pm 0.33$                             |
|                            | ba   | $1.89 \pm 0.03$                        | $-0.10 \pm 0.10$                           | $-0.13 \pm 0.10$                            | $0.18 \pm 0.18$                              | $-0.24 \pm 0.12$                             |
|                            | bad  | $1.79 \pm 0.04$                        | $0.07 \pm 0.10$                            | $0.04 \pm 0.09$                             | $0.37 \pm 0.19$                              | $-0.20 \pm 0.17$                             |
|                            | badq | $1.80 \pm 0.03$                        | $0.20 \pm 0.08$                            | $0.19 \pm 0.09$                             | $0.31 \pm 0.20$                              | $0.20 \pm 0.11$                              |
| $\text{NH}_4^+$            |      | $5.64 \pm 0.04$                        | $0.50 \pm 0.20$                            | $0.06 \pm 0.25$                             | $-0.52 \pm 0.34$                             | $-0.09 \pm 0.36$                             |
|                            | b    | $5.69 \pm 0.02$                        | $-0.03 \pm 0.03$                           | $-0.04 \pm 0.05$                            | $-0.07 \pm 0.05$                             | $-0.02 \pm 0.08$                             |
|                            | ba   | $5.68 \pm 0.01$                        | $-0.05 \pm 0.03$                           | $-0.05 \pm 0.05$                            | $-0.05 \pm 0.05$                             | $-0.04 \pm 0.06$                             |
|                            | bad  | $5.68 \pm 0.01$                        | $-0.05 \pm 0.03$                           | $-0.05 \pm 0.05$                            | $-0.05 \pm 0.05$                             | $-0.04 \pm 0.06$                             |
|                            | badq | $5.70 \pm 0.02$                        | $-0.05 \pm 0.03$                           | $-0.05 \pm 0.04$                            | $-0.07 \pm 0.06$                             | $-0.04 \pm 0.06$                             |
| $\text{CH}_3\text{CO}_2^-$ |      | $-9.33 \pm 0.08$                       | $-0.67 \pm 0.54$                           | $0.38 \pm 0.70$                             | $-0.30 \pm 0.59$                             | $1.87 \pm 0.59$                              |
|                            | b    | $-9.52 \pm 0.07$                       | $0.90 \pm 0.37$                            | $-0.37 \pm 0.54$                            | $-0.66 \pm 0.53$                             | $0.16 \pm 0.61$                              |
|                            | ba   | $-9.29 \pm 0.05$                       | $0.16 \pm 0.22$                            | $0.21 \pm 0.31$                             | $-0.41 \pm 0.27$                             | $1.39 \pm 0.29$                              |
|                            | bad  | $-9.14 \pm 0.05$                       | $-0.10 \pm 0.23$                           | $-0.32 \pm 0.40$                            | $-1.02 \pm 0.43$                             | $0.06 \pm 0.52$                              |
|                            | badq | $-9.27 \pm 0.07$                       | $0.29 \pm 0.26$                            | $0.37 \pm 0.47$                             | $-2.51 \pm 0.43$                             | $3.40 \pm 0.40$                              |
| $\text{H}_3\text{O}^+$     |      | $6.51 \pm 0.05$                        | $0.30 \pm 0.33$                            | $0.24 \pm 0.56$                             | $-0.92 \pm 0.76$                             | $1.84 \pm 0.32$                              |
|                            | b    | $6.42 \pm 0.04$                        | $0.40 \pm 0.24$                            | $0.48 \pm 0.46$                             | $-0.22 \pm 0.42$                             | $1.29 \pm 0.35$                              |
|                            | ba   | $6.35 \pm 0.02$                        | $-0.05 \pm 0.07$                           | $-0.06 \pm 0.07$                            | $-0.09 \pm 0.10$                             | $-0.10 \pm 0.10$                             |

*Continued on next page*

Table 7 – Continued from previous page

| Molec.                            | MM'  | $\Delta G_{\text{TI3}}^{N_i=11}$ | $\Delta \Delta G_{\text{TI}}^{N_i=2}$ | $\Delta \Delta G_{\text{BAR}}^{N_i=2}$ | $\Delta \Delta G_{\text{IEXP}}^{N_i=1}$ | $\Delta \Delta G_{\text{DEXP}}^{N_i=1}$ |
|-----------------------------------|------|----------------------------------|---------------------------------------|----------------------------------------|-----------------------------------------|-----------------------------------------|
| C <sub>6</sub> H <sub>5</sub> Cl  | bad  | 6.35 ± 0.02                      | -0.05 ± 0.07                          | -0.06 ± 0.07                           | -0.09 ± 0.10                            | -0.10 ± 0.10                            |
|                                   | badq | 6.41 ± 0.02                      | 0.03 ± 0.07                           | 0.03 ± 0.08                            | -0.10 ± 0.09                            | 0.11 ± 0.09                             |
|                                   |      | 0.38 ± 0.04                      | 0.20 ± 0.21                           | 0.32 ± 0.23                            | -0.15 ± 0.30                            | 0.58 ± 0.31                             |
|                                   | b    | 0.55 ± 0.04                      | 0.19 ± 0.16                           | 0.07 ± 0.18                            | 0.45 ± 0.39                             | 0.11 ± 0.26                             |
|                                   | ba   | -0.04 ± 0.03                     | -0.07 ± 0.13                          | -0.07 ± 0.13                           | 0.42 ± 0.33                             | -0.30 ± 0.26                            |
| C <sub>6</sub> H <sub>14</sub>    | bad  | -0.22 ± 0.04                     | -0.09 ± 0.13                          | -0.09 ± 0.13                           | 0.62 ± 0.33                             | -0.39 ± 0.27                            |
|                                   | badq | -0.40 ± 0.04                     | 0.13 ± 0.13                           | 0.16 ± 0.14                            | 0.44 ± 0.22                             | 0.02 ± 0.29                             |
|                                   |      | -0.43 ± 0.03                     | 0.06 ± 0.15                           | 0.00 ± 0.18                            | 0.09 ± 0.24                             | -1.15 ± 0.53                            |
|                                   | b    | -0.56 ± 0.04                     | 0.41 ± 0.15                           | 0.32 ± 0.15                            | 0.46 ± 0.17                             | -0.55 ± 0.34                            |
|                                   | ba   | -0.45 ± 0.08                     | 0.13 ± 0.16                           | 0.12 ± 0.18                            | 0.23 ± 0.20                             | 0.06 ± 0.20                             |
| CH <sub>3</sub> OH                | bad  | -0.47 ± 0.03                     | 0.03 ± 0.14                           | 0.08 ± 0.15                            | 0.33 ± 0.18                             | -0.17 ± 0.24                            |
|                                   | badq | -0.47 ± 0.03                     | -0.11 ± 0.14                          | -0.11 ± 0.18                           | 0.11 ± 0.29                             | -0.41 ± 0.24                            |
|                                   |      | -2.16 ± 0.03                     | -0.06 ± 0.18                          | -0.20 ± 0.22                           | -0.02 ± 0.39                            | -0.75 ± 0.49                            |
|                                   | b    | -2.13 ± 0.03                     | -0.25 ± 0.16                          | -0.27 ± 0.20                           | -0.26 ± 0.28                            | -0.28 ± 0.33                            |
|                                   | ba   | -2.13 ± 0.03                     | -0.22 ± 0.16                          | -0.31 ± 0.21                           | -0.27 ± 0.28                            | 0.01 ± 0.25                             |
| C <sub>2</sub> H <sub>6</sub>     | bad  | -1.99 ± 0.04                     | -0.01 ± 0.15                          | -0.02 ± 0.22                           | -0.35 ± 0.25                            | 0.18 ± 0.34                             |
|                                   | badq | -1.99 ± 0.04                     | -0.21 ± 0.17                          | -0.15 ± 0.19                           | -0.10 ± 0.22                            | -1.29 ± 0.44                            |
|                                   |      | 0.05 ± 0.02                      | -0.04 ± 0.10                          | 0.00 ± 0.09                            | 0.08 ± 0.13                             | 0.02 ± 0.12                             |
|                                   | b    | 0.06 ± 0.04                      | -0.15 ± 0.09                          | -0.17 ± 0.09                           | -0.25 ± 0.13                            | -0.20 ± 0.16                            |
|                                   | ba   | 0.09 ± 0.10                      | -0.12 ± 0.12                          | -0.13 ± 0.12                           | -0.13 ± 0.14                            | -0.15 ± 0.14                            |
| (CH <sub>2</sub> ) <sub>4</sub> O | bad  | 0.13 ± 0.12                      | -0.14 ± 0.14                          | -0.14 ± 0.14                           | -0.11 ± 0.16                            | -0.17 ± 0.15                            |
|                                   | badq | 0.07 ± 0.08                      | -0.12 ± 0.11                          | -0.12 ± 0.11                           | -0.11 ± 0.13                            | -0.27 ± 0.19                            |
|                                   |      | -1.97 ± 0.05                     | -0.50 ± 0.26                          | -0.02 ± 0.46                           | 1.14 ± 0.50                             | -0.52 ± 0.45                            |
|                                   | b    | -2.04 ± 0.05                     | -0.60 ± 0.31                          | -0.12 ± 0.52                           | 0.41 ± 0.39                             | -0.87 ± 0.47                            |

Continued on next page

Table 7 – Continued from previous page

| Molec.                            | MM'  | $\Delta G_{\text{TI3}}^{N_i=11}$ | $\Delta \Delta G_{\text{TI}}^{N_i=2}$ | $\Delta \Delta G_{\text{BAR}}^{N_i=2}$ | $\Delta \Delta G_{\text{IEXP}}^{N_i=1}$ | $\Delta \Delta G_{\text{DEXP}}^{N_i=1}$ |
|-----------------------------------|------|----------------------------------|---------------------------------------|----------------------------------------|-----------------------------------------|-----------------------------------------|
|                                   | ba   | $-2.28 \pm 0.03$                 | $-0.26 \pm 0.18$                      | $-0.08 \pm 0.32$                       | $-0.03 \pm 0.39$                        | $0.14 \pm 0.34$                         |
|                                   | bad  | $-2.20 \pm 0.03$                 | $-0.81 \pm 0.20$                      | $-0.80 \pm 0.32$                       | $0.04 \pm 0.46$                         | $-1.51 \pm 0.28$                        |
|                                   | badq | $-2.16 \pm 0.03$                 | $-0.11 \pm 0.18$                      | $-0.01 \pm 0.23$                       | $0.22 \pm 0.31$                         | $-0.21 \pm 0.28$                        |
| $\text{C}(\text{NH}_2)_3^+$       |      | $-0.97 \pm 0.06$                 | $-1.12 \pm 0.79$                      | $-0.33 \pm 0.62$                       | $-1.09 \pm 0.54$                        | $0.54 \pm 0.47$                         |
|                                   | b    | $-0.24 \pm 0.06$                 | $-1.51 \pm 0.50$                      | $-0.64 \pm 0.49$                       | $-0.34 \pm 0.59$                        | $-0.95 \pm 0.50$                        |
|                                   | ba   | $-0.60 \pm 0.05$                 | $-1.16 \pm 0.43$                      | $-0.77 \pm 0.33$                       | $-0.79 \pm 0.21$                        | $-0.29 \pm 0.53$                        |
|                                   | bad  | $-0.36 \pm 0.05$                 | $-0.64 \pm 0.28$                      | $-0.48 \pm 0.24$                       | $-0.44 \pm 0.16$                        | $0.37 \pm 0.50$                         |
|                                   | badq | $-0.02 \pm 0.05$                 | $0.16 \pm 0.24$                       | $0.03 \pm 0.26$                        | $-0.43 \pm 0.22$                        | $0.66 \pm 0.28$                         |
| $\text{C}_6\text{H}_5\text{NH}_2$ |      | $-3.04 \pm 0.04$                 | $0.50 \pm 0.22$                       | $0.70 \pm 0.40$                        | $2.28 \pm 0.54$                         | $0.09 \pm 0.41$                         |
|                                   | b    | $-3.06 \pm 0.04$                 | $0.26 \pm 0.21$                       | $0.33 \pm 0.35$                        | $1.16 \pm 0.48$                         | $-0.14 \pm 0.28$                        |
|                                   | ba   | $-3.09 \pm 0.05$                 | $-0.02 \pm 0.20$                      | $-0.19 \pm 0.24$                       | $0.01 \pm 0.37$                         | $-0.25 \pm 0.34$                        |
|                                   | bad  | $-3.22 \pm 0.04$                 | $0.10 \pm 0.19$                       | $-0.06 \pm 0.25$                       | $0.16 \pm 0.38$                         | $-0.34 \pm 0.29$                        |
|                                   | badq | $-3.26 \pm 0.08$                 | $-1.07 \pm 0.35$                      | $-0.81 \pm 0.50$                       | $-3.36 \pm 0.35$                        | $1.84 \pm 0.38$                         |
| $\text{CH}_3\text{CONH}_2$        |      | $-3.59 \pm 0.05$                 | $0.07 \pm 0.25$                       | $0.00 \pm 0.55$                        | $1.00 \pm 0.53$                         | $0.21 \pm 0.40$                         |
|                                   | b    | $-3.41 \pm 0.04$                 | $-0.03 \pm 0.24$                      | $0.29 \pm 0.40$                        | $2.46 \pm 0.36$                         | $0.61 \pm 0.29$                         |
|                                   | ba   | $-3.52 \pm 0.05$                 | $0.20 \pm 0.24$                       | $0.49 \pm 0.49$                        | $1.40 \pm 0.57$                         | $-0.90 \pm 0.58$                        |
|                                   | bad  | $-3.50 \pm 0.04$                 | $-0.29 \pm 0.24$                      | $-0.28 \pm 0.47$                       | $1.38 \pm 0.56$                         | $-1.05 \pm 0.38$                        |
|                                   | badq | $-3.59 \pm 0.04$                 | $0.48 \pm 0.18$                       | $0.76 \pm 0.32$                        | $1.09 \pm 0.22$                         | $1.26 \pm 0.32$                         |
| $\text{H}_2\text{O}$              |      | $-3.62 \pm 0.03$                 | $-0.18 \pm 0.17$                      | $-0.39 \pm 0.30$                       | $-0.60 \pm 0.24$                        | $-0.28 \pm 0.36$                        |
|                                   | b    | $-3.72 \pm 0.03$                 | $0.30 \pm 0.14$                       | $0.14 \pm 0.31$                        | $-0.64 \pm 0.24$                        | $0.81 \pm 0.36$                         |
|                                   | ba   | $-3.78 \pm 0.03$                 | $0.37 \pm 0.13$                       | $0.18 \pm 0.29$                        | $-0.52 \pm 0.32$                        | $0.71 \pm 0.29$                         |
|                                   | bad  | $-3.79 \pm 0.03$                 | $0.37 \pm 0.13$                       | $0.18 \pm 0.29$                        | $-0.52 \pm 0.32$                        | $0.71 \pm 0.29$                         |
|                                   | badq | $-3.72 \pm 0.03$                 | $0.00 \pm 0.13$                       | $-0.08 \pm 0.34$                       | $-0.54 \pm 0.30$                        | $0.04 \pm 0.45$                         |
| $\text{C}_2\text{H}_5\text{OH}$   |      | $-2.71 \pm 0.04$                 | $-0.12 \pm 0.18$                      | $-0.11 \pm 0.26$                       | $-0.28 \pm 0.26$                        | $-1.64 \pm 0.40$                        |

Continued on next page

Table 7 – Continued from previous page

| Molec.                          | MM'  | $\Delta G_{\text{TI3}}^{N_i=11}$ | $\Delta\Delta G_{\text{TI}}^{N_i=2}$ | $\Delta\Delta G_{\text{BAR}}^{N_i=2}$ | $\Delta\Delta G_{\text{IEXP}}^{N_i=1}$ | $\Delta\Delta G_{\text{DEXP}}^{N_i=1}$ |
|---------------------------------|------|----------------------------------|--------------------------------------|---------------------------------------|----------------------------------------|----------------------------------------|
|                                 | b    | $-2.60 \pm 0.04$                 | $-0.35 \pm 0.16$                     | $-0.25 \pm 0.17$                      | $-0.69 \pm 0.22$                       | $0.26 \pm 0.26$                        |
|                                 | ba   | $-2.72 \pm 0.05$                 | $0.07 \pm 0.20$                      | $0.01 \pm 0.28$                       | $-0.10 \pm 0.15$                       | $-0.76 \pm 0.51$                       |
|                                 | bad  | $-2.79 \pm 0.05$                 | $0.10 \pm 0.19$                      | $0.08 \pm 0.27$                       | $-0.08 \pm 0.15$                       | $-0.18 \pm 0.45$                       |
|                                 | badq | $-2.83 \pm 0.04$                 | $0.33 \pm 0.18$                      | $0.57 \pm 0.23$                       | $0.46 \pm 0.19$                        | $0.15 \pm 0.41$                        |
| $\text{C}_6\text{H}_6$          |      | $-0.94 \pm 0.02$                 | $0.06 \pm 0.11$                      | $0.03 \pm 0.13$                       | $0.67 \pm 0.30$                        | $-0.30 \pm 0.13$                       |
|                                 | b    | $-0.86 \pm 0.02$                 | $0.14 \pm 0.09$                      | $0.13 \pm 0.10$                       | $0.20 \pm 0.12$                        | $0.07 \pm 0.12$                        |
|                                 | ba   | $-0.70 \pm 0.08$                 | $0.29 \pm 0.14$                      | $0.22 \pm 0.14$                       | $0.42 \pm 0.16$                        | $-0.41 \pm 0.38$                       |
|                                 | bad  | $-0.59 \pm 0.16$                 | $0.23 \pm 0.19$                      | $0.19 \pm 0.18$                       | $0.30 \pm 0.21$                        | $-0.20 \pm 0.26$                       |
|                                 | badq | $-0.67 \pm 0.02$                 | $0.05 \pm 0.08$                      | $0.05 \pm 0.08$                       | $0.16 \pm 0.12$                        | $0.04 \pm 0.11$                        |
| $\text{C}_6\text{H}_5\text{OH}$ |      | $-2.17 \pm 0.03$                 | $0.17 \pm 0.20$                      | $0.22 \pm 0.30$                       | $0.34 \pm 0.36$                        | $0.05 \pm 0.34$                        |
|                                 | b    | $-2.13 \pm 0.04$                 | $-0.43 \pm 0.19$                     | $-0.37 \pm 0.25$                      | $-0.11 \pm 0.28$                       | $-0.69 \pm 0.28$                       |
|                                 | ba   | $-2.26 \pm 0.03$                 | $0.14 \pm 0.18$                      | $0.11 \pm 0.24$                       | $-0.32 \pm 0.24$                       | $0.12 \pm 0.32$                        |
|                                 | bad  | $-2.22 \pm 0.03$                 | $0.02 \pm 0.18$                      | $-0.10 \pm 0.33$                      | $-0.36 \pm 0.35$                       | $0.10 \pm 0.28$                        |
|                                 | badq | $-2.36 \pm 0.06$                 | $-1.33 \pm 0.36$                     | $0.05 \pm 0.75$                       | $-1.15 \pm 0.50$                       | $1.09 \pm 0.56$                        |

Table 8: MM-to-QM net solvation free energy correction values from 3- $\lambda$  states simulated for 50 ps

| Molec.                     | MM'  | $\Delta G_{\text{TI}3}^{N_\lambda=11}$ | $\Delta\Delta G_{\text{TI}}^{N_\lambda=3}$ | $\Delta\Delta G_{\text{BAR}}^{N_\lambda=3}$ | $\Delta\Delta G_{\text{IEXP}}^{N_\lambda=2}$ | $\Delta\Delta G_{\text{DEXP}}^{N_\lambda=2}$ |
|----------------------------|------|----------------------------------------|--------------------------------------------|---------------------------------------------|----------------------------------------------|----------------------------------------------|
| $\text{CO}_3^{2-}$         |      | $-6.45 \pm 0.12$                       | $-0.14 \pm 0.72$                           | $-1.26 \pm 0.82$                            | $0.78 \pm 0.61$                              | $-3.75 \pm 0.64$                             |
|                            | b    | $-6.47 \pm 0.07$                       | $0.10 \pm 0.33$                            | $-0.02 \pm 0.25$                            | $0.11 \pm 0.28$                              | $0.06 \pm 0.35$                              |
|                            | ba   | $-6.13 \pm 0.06$                       | $0.10 \pm 0.28$                            | $0.37 \pm 0.23$                             | $-0.57 \pm 0.24$                             | $0.95 \pm 0.34$                              |
|                            | bad  | $-6.09 \pm 0.06$                       | $0.92 \pm 0.24$                            | $0.82 \pm 0.23$                             | $0.30 \pm 0.46$                              | $1.24 \pm 0.40$                              |
|                            | badq | $-6.07 \pm 0.06$                       | $-0.49 \pm 0.30$                           | $-0.60 \pm 0.22$                            | $0.72 \pm 0.40$                              | $-0.88 \pm 0.31$                             |
| $\text{CH}_3\text{NH}_3^+$ |      | $1.79 \pm 0.04$                        | $-0.32 \pm 0.22$                           | $-0.29 \pm 0.17$                            | $-0.16 \pm 0.29$                             | $-0.46 \pm 0.28$                             |
|                            | b    | $1.89 \pm 0.03$                        | $-0.03 \pm 0.11$                           | $-0.04 \pm 0.12$                            | $0.07 \pm 0.19$                              | $-0.10 \pm 0.22$                             |
|                            | ba   | $1.89 \pm 0.03$                        | $-0.00 \pm 0.09$                           | $-0.02 \pm 0.08$                            | $0.07 \pm 0.11$                              | $-0.09 \pm 0.10$                             |
|                            | bad  | $1.79 \pm 0.04$                        | $0.01 \pm 0.08$                            | $0.02 \pm 0.07$                             | $0.14 \pm 0.10$                              | $-0.10 \pm 0.10$                             |
|                            | badq | $1.80 \pm 0.03$                        | $0.10 \pm 0.09$                            | $0.12 \pm 0.07$                             | $0.14 \pm 0.10$                              | $0.09 \pm 0.12$                              |
| $\text{NH}_4^+$            |      | $5.64 \pm 0.04$                        | $0.17 \pm 0.17$                            | $0.15 \pm 0.15$                             | $0.02 \pm 0.26$                              | $-0.03 \pm 0.29$                             |
|                            | b    | $5.69 \pm 0.02$                        | $-0.04 \pm 0.04$                           | $-0.04 \pm 0.04$                            | $-0.05 \pm 0.04$                             | $-0.03 \pm 0.05$                             |
|                            | ba   | $5.68 \pm 0.01$                        | $-0.04 \pm 0.02$                           | $-0.05 \pm 0.02$                            | $-0.05 \pm 0.03$                             | $-0.04 \pm 0.04$                             |
|                            | bad  | $5.68 \pm 0.01$                        | $-0.04 \pm 0.02$                           | $-0.05 \pm 0.02$                            | $-0.05 \pm 0.03$                             | $-0.04 \pm 0.04$                             |
|                            | badq | $5.70 \pm 0.02$                        | $-0.06 \pm 0.03$                           | $-0.07 \pm 0.03$                            | $-0.08 \pm 0.04$                             | $-0.06 \pm 0.03$                             |
| $\text{CH}_3\text{CO}_2^-$ |      | $-9.33 \pm 0.08$                       | $0.72 \pm 0.41$                            | $0.35 \pm 0.38$                             | $0.85 \pm 0.57$                              | $1.07 \pm 0.42$                              |
|                            | b    | $-9.52 \pm 0.07$                       | $-0.20 \pm 0.30$                           | $-0.27 \pm 0.29$                            | $-0.58 \pm 0.42$                             | $-0.30 \pm 0.47$                             |
|                            | ba   | $-9.29 \pm 0.05$                       | $-0.38 \pm 0.25$                           | $-0.30 \pm 0.21$                            | $-0.38 \pm 0.31$                             | $-0.10 \pm 0.33$                             |
|                            | bad  | $-9.14 \pm 0.05$                       | $0.03 \pm 0.23$                            | $-0.07 \pm 0.21$                            | $-0.29 \pm 0.32$                             | $0.09 \pm 0.33$                              |
|                            | badq | $-9.27 \pm 0.07$                       | $-0.15 \pm 0.22$                           | $-0.09 \pm 0.27$                            | $-1.20 \pm 0.36$                             | $1.11 \pm 0.32$                              |
| $\text{H}_3\text{O}^+$     |      | $6.51 \pm 0.05$                        | $0.17 \pm 0.32$                            | $-0.02 \pm 0.35$                            | $0.76 \pm 0.70$                              | $0.48 \pm 0.49$                              |
|                            | b    | $6.42 \pm 0.04$                        | $0.09 \pm 0.22$                            | $0.16 \pm 0.27$                             | $0.15 \pm 0.37$                              | $0.17 \pm 0.42$                              |
|                            | ba   | $6.35 \pm 0.02$                        | $-0.11 \pm 0.07$                           | $-0.09 \pm 0.06$                            | $-0.08 \pm 0.07$                             | $-0.14 \pm 0.08$                             |

*Continued on next page*

Table 8 – Continued from previous page

| Molec.                          | MM'  | $\Delta G_{\text{TI3}}^{N_i=11}$ | $\Delta \Delta G_{\text{TI}}^{N_i=3}$ | $\Delta \Delta G_{\text{BAR}}^{N_i=3}$ | $\Delta \Delta G_{\text{IEXP}}^{N_i=2}$ | $\Delta \Delta G_{\text{DEXP}}^{N_i=2}$ |
|---------------------------------|------|----------------------------------|---------------------------------------|----------------------------------------|-----------------------------------------|-----------------------------------------|
|                                 | bad  | $6.35 \pm 0.02$                  | $-0.11 \pm 0.07$                      | $-0.09 \pm 0.06$                       | $-0.08 \pm 0.07$                        | $-0.14 \pm 0.08$                        |
|                                 | badq | $6.41 \pm 0.02$                  | $0.00 \pm 0.07$                       | $0.01 \pm 0.06$                        | $-0.02 \pm 0.08$                        | $0.02 \pm 0.08$                         |
| $\text{C}_6\text{H}_5\text{Cl}$ |      | $0.38 \pm 0.04$                  | $0.13 \pm 0.20$                       | $0.21 \pm 0.16$                        | $0.06 \pm 0.21$                         | $0.01 \pm 0.26$                         |
|                                 | b    | $0.55 \pm 0.04$                  | $-0.06 \pm 0.16$                      | $-0.01 \pm 0.12$                       | $0.06 \pm 0.18$                         | $-0.22 \pm 0.19$                        |
|                                 | ba   | $-0.04 \pm 0.03$                 | $0.00 \pm 0.13$                       | $-0.03 \pm 0.10$                       | $0.35 \pm 0.17$                         | $-0.19 \pm 0.13$                        |
|                                 | bad  | $-0.22 \pm 0.04$                 | $-0.15 \pm 0.11$                      | $-0.16 \pm 0.10$                       | $0.09 \pm 0.22$                         | $-0.20 \pm 0.15$                        |
|                                 | badq | $-0.40 \pm 0.04$                 | $0.17 \pm 0.12$                       | $0.17 \pm 0.09$                        | $0.23 \pm 0.15$                         | $0.13 \pm 0.15$                         |
| $\text{C}_6\text{H}_{14}$       |      | $-0.43 \pm 0.03$                 | $0.03 \pm 0.18$                       | $0.06 \pm 0.13$                        | $0.40 \pm 0.18$                         | $-0.63 \pm 0.30$                        |
|                                 | b    | $-0.56 \pm 0.04$                 | $0.21 \pm 0.15$                       | $0.24 \pm 0.10$                        | $0.49 \pm 0.18$                         | $-0.21 \pm 0.21$                        |
|                                 | ba   | $-0.45 \pm 0.08$                 | $-0.18 \pm 0.13$                      | $-0.14 \pm 0.12$                       | $-0.05 \pm 0.16$                        | $-0.16 \pm 0.15$                        |
|                                 | bad  | $-0.47 \pm 0.03$                 | $-0.12 \pm 0.11$                      | $-0.08 \pm 0.10$                       | $0.12 \pm 0.19$                         | $-0.17 \pm 0.14$                        |
|                                 | badq | $-0.47 \pm 0.03$                 | $-0.14 \pm 0.13$                      | $-0.13 \pm 0.11$                       | $-0.02 \pm 0.17$                        | $-0.32 \pm 0.17$                        |
| $\text{CH}_3\text{OH}$          |      | $-2.16 \pm 0.03$                 | $-0.12 \pm 0.16$                      | $-0.14 \pm 0.14$                       | $-0.03 \pm 0.26$                        | $-0.29 \pm 0.25$                        |
|                                 | b    | $-2.13 \pm 0.03$                 | $-0.11 \pm 0.16$                      | $-0.16 \pm 0.13$                       | $0.12 \pm 0.18$                         | $-0.27 \pm 0.18$                        |
|                                 | ba   | $-2.13 \pm 0.03$                 | $-0.06 \pm 0.15$                      | $-0.11 \pm 0.13$                       | $-0.09 \pm 0.17$                        | $-0.14 \pm 0.19$                        |
|                                 | bad  | $-1.99 \pm 0.04$                 | $0.10 \pm 0.16$                       | $0.10 \pm 0.13$                        | $-0.04 \pm 0.15$                        | $0.02 \pm 0.22$                         |
|                                 | badq | $-1.99 \pm 0.04$                 | $-0.16 \pm 0.20$                      | $-0.17 \pm 0.15$                       | $0.27 \pm 0.27$                         | $-0.81 \pm 0.28$                        |
| $\text{C}_2\text{H}_6$          |      | $0.05 \pm 0.02$                  | $-0.05 \pm 0.07$                      | $-0.04 \pm 0.08$                       | $0.01 \pm 0.11$                         | $-0.05 \pm 0.10$                        |
|                                 | b    | $0.06 \pm 0.04$                  | $-0.18 \pm 0.08$                      | $-0.18 \pm 0.07$                       | $-0.21 \pm 0.09$                        | $-0.19 \pm 0.10$                        |
|                                 | ba   | $0.09 \pm 0.10$                  | $-0.04 \pm 0.12$                      | $-0.05 \pm 0.12$                       | $-0.02 \pm 0.12$                        | $-0.08 \pm 0.12$                        |
|                                 | bad  | $0.13 \pm 0.12$                  | $-0.10 \pm 0.13$                      | $-0.10 \pm 0.13$                       | $-0.09 \pm 0.14$                        | $-0.12 \pm 0.14$                        |
|                                 | badq | $0.07 \pm 0.08$                  | $0.01 \pm 0.10$                       | $-0.02 \pm 0.09$                       | $0.00 \pm 0.11$                         | $-0.05 \pm 0.11$                        |
| $(\text{CH}_2)_4\text{O}$       |      | $-1.97 \pm 0.05$                 | $0.05 \pm 0.21$                       | $-0.03 \pm 0.20$                       | $0.79 \pm 0.31$                         | $-0.65 \pm 0.39$                        |
|                                 | b    | $-2.04 \pm 0.05$                 | $-0.50 \pm 0.30$                      | $-0.49 \pm 0.26$                       | $0.41 \pm 0.38$                         | $-1.11 \pm 0.34$                        |

Continued on next page



Table 8 – Continued from previous page

| Molec.                            | MM'  | $\Delta G_{\text{TI3}}^{N_i=11}$ | $\Delta \Delta G_{\text{TI}}^{N_i=3}$ | $\Delta \Delta G_{\text{BAR}}^{N_i=3}$ | $\Delta \Delta G_{\text{IEXP}}^{N_i=2}$ | $\Delta \Delta G_{\text{DEXP}}^{N_i=2}$ |
|-----------------------------------|------|----------------------------------|---------------------------------------|----------------------------------------|-----------------------------------------|-----------------------------------------|
|                                   | ba   | $-2.28 \pm 0.03$                 | $-0.16 \pm 0.18$                      | $-0.14 \pm 0.20$                       | $0.04 \pm 0.39$                         | $-0.30 \pm 0.24$                        |
|                                   | bad  | $-2.20 \pm 0.03$                 | $-0.16 \pm 0.17$                      | $-0.28 \pm 0.16$                       | $0.16 \pm 0.29$                         | $-0.68 \pm 0.22$                        |
|                                   | badq | $-2.16 \pm 0.03$                 | $-0.17 \pm 0.18$                      | $-0.17 \pm 0.18$                       | $0.25 \pm 0.26$                         | $-0.35 \pm 0.22$                        |
| $\text{C}(\text{NH}_2)_3^+$       |      | $-0.97 \pm 0.06$                 | $-0.13 \pm 0.36$                      | $0.01 \pm 0.34$                        | $-0.17 \pm 0.34$                        | $0.33 \pm 0.43$                         |
|                                   | b    | $-0.24 \pm 0.06$                 | $-0.47 \pm 0.28$                      | $-0.32 \pm 0.28$                       | $0.27 \pm 0.43$                         | $-0.63 \pm 0.34$                        |
|                                   | ba   | $-0.60 \pm 0.05$                 | $-0.96 \pm 0.26$                      | $-0.80 \pm 0.23$                       | $-1.34 \pm 0.43$                        | $-0.81 \pm 0.32$                        |
|                                   | bad  | $-0.36 \pm 0.05$                 | $-0.49 \pm 0.20$                      | $-0.46 \pm 0.16$                       | $-0.24 \pm 0.16$                        | $-0.44 \pm 0.33$                        |
|                                   | badq | $-0.02 \pm 0.05$                 | $-0.16 \pm 0.20$                      | $-0.15 \pm 0.17$                       | $-0.14 \pm 0.18$                        | $-0.06 \pm 0.24$                        |
| $\text{C}_6\text{H}_5\text{NH}_2$ |      | $-3.04 \pm 0.04$                 | $0.16 \pm 0.22$                       | $0.23 \pm 0.20$                        | $1.22 \pm 0.46$                         | $-0.30 \pm 0.30$                        |
|                                   | b    | $-3.06 \pm 0.04$                 | $0.15 \pm 0.17$                       | $0.21 \pm 0.16$                        | $0.49 \pm 0.27$                         | $-0.08 \pm 0.24$                        |
|                                   | ba   | $-3.09 \pm 0.05$                 | $0.17 \pm 0.19$                       | $0.07 \pm 0.14$                        | $0.39 \pm 0.20$                         | $-0.18 \pm 0.21$                        |
|                                   | bad  | $-3.22 \pm 0.04$                 | $0.56 \pm 0.17$                       | $0.44 \pm 0.16$                        | $0.59 \pm 0.25$                         | $0.21 \pm 0.23$                         |
|                                   | badq | $-3.26 \pm 0.08$                 | $-1.18 \pm 0.26$                      | $-1.03 \pm 0.28$                       | $-2.06 \pm 0.35$                        | $-0.04 \pm 0.35$                        |
| $\text{CH}_3\text{CONH}_2$        |      | $-3.59 \pm 0.05$                 | $0.04 \pm 0.24$                       | $0.11 \pm 0.25$                        | $0.71 \pm 0.40$                         | $-0.47 \pm 0.41$                        |
|                                   | b    | $-3.41 \pm 0.04$                 | $-0.20 \pm 0.23$                      | $-0.08 \pm 0.21$                       | $0.80 \pm 0.27$                         | $-0.46 \pm 0.30$                        |
|                                   | ba   | $-3.52 \pm 0.05$                 | $0.33 \pm 0.22$                       | $0.40 \pm 0.24$                        | $0.85 \pm 0.48$                         | $-0.42 \pm 0.53$                        |
|                                   | bad  | $-3.50 \pm 0.04$                 | $-0.20 \pm 0.21$                      | $-0.14 \pm 0.20$                       | $0.54 \pm 0.46$                         | $-1.09 \pm 0.43$                        |
|                                   | badq | $-3.59 \pm 0.04$                 | $0.24 \pm 0.18$                       | $0.33 \pm 0.19$                        | $0.59 \pm 0.21$                         | $0.08 \pm 0.48$                         |
| $\text{H}_2\text{O}$              |      | $-3.62 \pm 0.03$                 | $-0.21 \pm 0.16$                      | $-0.22 \pm 0.15$                       | $-0.28 \pm 0.16$                        | $-0.45 \pm 0.29$                        |
|                                   | b    | $-3.72 \pm 0.03$                 | $0.11 \pm 0.13$                       | $0.13 \pm 0.15$                        | $-0.26 \pm 0.16$                        | $0.39 \pm 0.25$                         |
|                                   | ba   | $-3.78 \pm 0.03$                 | $0.39 \pm 0.13$                       | $0.38 \pm 0.12$                        | $0.02 \pm 0.16$                         | $0.58 \pm 0.19$                         |
|                                   | bad  | $-3.79 \pm 0.03$                 | $0.39 \pm 0.13$                       | $0.38 \pm 0.12$                        | $0.02 \pm 0.16$                         | $0.58 \pm 0.19$                         |
|                                   | badq | $-3.72 \pm 0.03$                 | $0.10 \pm 0.15$                       | $0.06 \pm 0.18$                        | $0.14 \pm 0.19$                         | $0.04 \pm 0.35$                         |
| $\text{C}_2\text{H}_5\text{OH}$   |      | $-2.71 \pm 0.04$                 | $-0.15 \pm 0.17$                      | $-0.12 \pm 0.16$                       | $-0.15 \pm 0.18$                        | $-0.59 \pm 0.24$                        |

Continued on next page

Table 8 – *Continued from previous page*

| Molec.                           | MM'  | $\Delta G_{\text{TI3}}^{N_i=11}$ | $\Delta\Delta G_{\text{TI}}^{N_i=3}$ | $\Delta\Delta G_{\text{BAR}}^{N_i=3}$ | $\Delta\Delta G_{\text{IEXP}}^{N_i=2}$ | $\Delta\Delta G_{\text{DEXP}}^{N_i=2}$ |
|----------------------------------|------|----------------------------------|--------------------------------------|---------------------------------------|----------------------------------------|----------------------------------------|
|                                  | b    | $-2.60 \pm 0.04$                 | $-0.01 \pm 0.17$                     | $-0.09 \pm 0.14$                      | $0.21 \pm 0.40$                        | $-0.07 \pm 0.19$                       |
|                                  | ba   | $-2.72 \pm 0.05$                 | $0.40 \pm 0.20$                      | $0.38 \pm 0.16$                       | $0.45 \pm 0.19$                        | $-0.22 \pm 0.38$                       |
|                                  | bad  | $-2.79 \pm 0.05$                 | $-0.16 \pm 0.15$                     | $-0.12 \pm 0.16$                      | $-0.15 \pm 0.15$                       | $-0.30 \pm 0.33$                       |
|                                  | badq | $-2.83 \pm 0.04$                 | $-0.22 \pm 0.16$                     | $-0.12 \pm 0.16$                      | $0.12 \pm 0.25$                        | $-0.07 \pm 0.23$                       |
| C <sub>6</sub> H <sub>6</sub>    |      | $-0.94 \pm 0.02$                 | $0.07 \pm 0.11$                      | $0.06 \pm 0.08$                       | $0.35 \pm 0.14$                        | $-0.23 \pm 0.10$                       |
|                                  | b    | $-0.86 \pm 0.02$                 | $-0.11 \pm 0.09$                     | $-0.05 \pm 0.08$                      | $0.02 \pm 0.09$                        | $-0.18 \pm 0.12$                       |
|                                  | ba   | $-0.70 \pm 0.08$                 | $0.15 \pm 0.12$                      | $0.16 \pm 0.11$                       | $0.27 \pm 0.13$                        | $-0.08 \pm 0.19$                       |
|                                  | bad  | $-0.59 \pm 0.16$                 | $-0.50 \pm 0.18$                     | $-0.35 \pm 0.17$                      | $-0.28 \pm 0.19$                       | $-0.54 \pm 0.20$                       |
|                                  | badq | $-0.67 \pm 0.02$                 | $-0.31 \pm 0.10$                     | $-0.24 \pm 0.07$                      | $-0.14 \pm 0.11$                       | $-0.32 \pm 0.16$                       |
| C <sub>6</sub> H <sub>5</sub> OH |      | $-2.17 \pm 0.03$                 | $0.34 \pm 0.16$                      | $0.34 \pm 0.20$                       | $0.45 \pm 0.28$                        | $0.13 \pm 0.26$                        |
|                                  | b    | $-2.13 \pm 0.04$                 | $-0.27 \pm 0.18$                     | $-0.28 \pm 0.18$                      | $0.02 \pm 0.35$                        | $-0.74 \pm 0.33$                       |
|                                  | ba   | $-2.26 \pm 0.03$                 | $-0.06 \pm 0.17$                     | $-0.03 \pm 0.18$                      | $0.02 \pm 0.27$                        | $-0.12 \pm 0.23$                       |
|                                  | bad  | $-2.22 \pm 0.03$                 | $-0.32 \pm 0.15$                     | $-0.30 \pm 0.18$                      | $-0.18 \pm 0.27$                       | $-0.29 \pm 0.22$                       |
|                                  | badq | $-2.36 \pm 0.06$                 | $-0.30 \pm 0.28$                     | $-0.32 \pm 0.41$                      | $-0.14 \pm 0.43$                       | $0.58 \pm 0.47$                        |

Table 9: MM-to-QM net solvation free energy correction values from 6- $\lambda$  states simulated for 50 ps

| Molec.                     | MM'  | $\Delta G_{\text{TI3}}^{N_\lambda=11}$ | $\Delta\Delta G_{\text{TI}}^{N_\lambda=6}$ | $\Delta\Delta G_{\text{BAR}}^{N_\lambda=6}$ | $\Delta\Delta G_{\text{IEXP}}^{N_\lambda=5}$ | $\Delta\Delta G_{\text{DEXP}}^{N_\lambda=5}$ |
|----------------------------|------|----------------------------------------|--------------------------------------------|---------------------------------------------|----------------------------------------------|----------------------------------------------|
| $\text{CO}_3^{2-}$         |      | $-6.45 \pm 0.12$                       | $-0.74 \pm 0.46$                           | $-0.80 \pm 0.42$                            | $-0.14 \pm 0.56$                             | $-1.87 \pm 0.61$                             |
|                            | b    | $-6.47 \pm 0.07$                       | $-0.09 \pm 0.19$                           | $-0.10 \pm 0.17$                            | $0.21 \pm 0.42$                              | $-0.18 \pm 0.27$                             |
|                            | ba   | $-6.13 \pm 0.06$                       | $0.22 \pm 0.17$                            | $0.25 \pm 0.15$                             | $0.04 \pm 0.22$                              | $0.39 \pm 0.22$                              |
|                            | bad  | $-6.09 \pm 0.06$                       | $0.27 \pm 0.17$                            | $0.29 \pm 0.13$                             | $0.30 \pm 0.22$                              | $0.35 \pm 0.21$                              |
|                            | badq | $-6.07 \pm 0.06$                       | $-0.33 \pm 0.17$                           | $-0.31 \pm 0.15$                            | $-0.20 \pm 0.21$                             | $-0.54 \pm 0.21$                             |
| $\text{CH}_3\text{NH}_3^+$ |      | $1.79 \pm 0.04$                        | $-0.19 \pm 0.15$                           | $-0.20 \pm 0.12$                            | $0.10 \pm 0.17$                              | $-0.26 \pm 0.17$                             |
|                            | b    | $1.89 \pm 0.03$                        | $-0.05 \pm 0.08$                           | $-0.05 \pm 0.07$                            | $-0.03 \pm 0.09$                             | $-0.06 \pm 0.11$                             |
|                            | ba   | $1.89 \pm 0.03$                        | $0.00 \pm 0.07$                            | $-0.01 \pm 0.06$                            | $0.02 \pm 0.07$                              | $-0.06 \pm 0.07$                             |
|                            | bad  | $1.79 \pm 0.04$                        | $-0.05 \pm 0.06$                           | $-0.06 \pm 0.05$                            | $-0.00 \pm 0.07$                             | $-0.12 \pm 0.07$                             |
|                            | badq | $1.80 \pm 0.03$                        | $-0.04 \pm 0.05$                           | $-0.03 \pm 0.04$                            | $-0.01 \pm 0.06$                             | $-0.04 \pm 0.06$                             |
| $\text{NH}_4^+$            |      | $5.64 \pm 0.04$                        | $0.19 \pm 0.12$                            | $0.16 \pm 0.09$                             | $0.29 \pm 0.16$                              | $0.10 \pm 0.12$                              |
|                            | b    | $5.69 \pm 0.02$                        | $-0.03 \pm 0.03$                           | $-0.03 \pm 0.03$                            | $-0.03 \pm 0.03$                             | $-0.03 \pm 0.03$                             |
|                            | ba   | $5.68 \pm 0.01$                        | $-0.01 \pm 0.02$                           | $-0.01 \pm 0.02$                            | $-0.01 \pm 0.02$                             | $-0.02 \pm 0.02$                             |
|                            | bad  | $5.68 \pm 0.01$                        | $-0.01 \pm 0.02$                           | $-0.01 \pm 0.02$                            | $-0.01 \pm 0.02$                             | $-0.02 \pm 0.02$                             |
|                            | badq | $5.70 \pm 0.02$                        | $-0.04 \pm 0.03$                           | $-0.04 \pm 0.03$                            | $-0.04 \pm 0.03$                             | $-0.03 \pm 0.03$                             |
| $\text{CH}_3\text{CO}_2^-$ |      | $-9.33 \pm 0.08$                       | $0.32 \pm 0.27$                            | $0.16 \pm 0.22$                             | $0.78 \pm 0.49$                              | $0.14 \pm 0.30$                              |
|                            | b    | $-9.52 \pm 0.07$                       | $0.51 \pm 0.17$                            | $0.47 \pm 0.15$                             | $0.50 \pm 0.21$                              | $0.37 \pm 0.23$                              |
|                            | ba   | $-9.29 \pm 0.05$                       | $-0.14 \pm 0.16$                           | $-0.16 \pm 0.12$                            | $0.11 \pm 0.20$                              | $-0.24 \pm 0.18$                             |
|                            | bad  | $-9.14 \pm 0.05$                       | $-0.04 \pm 0.14$                           | $-0.08 \pm 0.12$                            | $-0.17 \pm 0.16$                             | $-0.03 \pm 0.17$                             |
|                            | badq | $-9.27 \pm 0.07$                       | $-0.31 \pm 0.18$                           | $-0.33 \pm 0.16$                            | $-0.38 \pm 0.29$                             | $-0.17 \pm 0.21$                             |
| $\text{H}_3\text{O}^+$     |      | $6.51 \pm 0.05$                        | $0.15 \pm 0.19$                            | $0.10 \pm 0.16$                             | $0.31 \pm 0.30$                              | $0.09 \pm 0.22$                              |
|                            | b    | $6.42 \pm 0.04$                        | $-0.13 \pm 0.15$                           | $-0.11 \pm 0.12$                            | $-0.12 \pm 0.18$                             | $-0.09 \pm 0.17$                             |
|                            | ba   | $6.35 \pm 0.02$                        | $0.07 \pm 0.04$                            | $0.07 \pm 0.04$                             | $0.08 \pm 0.06$                              | $0.06 \pm 0.06$                              |

*Continued on next page*

Table 9 – Continued from previous page

| Molec.                          | MM'  | $\Delta G_{\text{TI3}}^{N_i=11}$ | $\Delta \Delta G_{\text{TI}}^{N_i=6}$ | $\Delta \Delta G_{\text{BAR}}^{N_i=6}$ | $\Delta \Delta G_{\text{IEXP}}^{N_i=5}$ | $\Delta \Delta G_{\text{DEXP}}^{N_i=5}$ |
|---------------------------------|------|----------------------------------|---------------------------------------|----------------------------------------|-----------------------------------------|-----------------------------------------|
|                                 | bad  | $6.35 \pm 0.02$                  | $0.07 \pm 0.04$                       | $0.07 \pm 0.04$                        | $0.08 \pm 0.06$                         | $0.06 \pm 0.06$                         |
|                                 | badq | $6.41 \pm 0.02$                  | $-0.08 \pm 0.04$                      | $-0.07 \pm 0.04$                       | $-0.08 \pm 0.05$                        | $-0.06 \pm 0.06$                        |
| $\text{C}_6\text{H}_5\text{Cl}$ |      | $0.38 \pm 0.04$                  | $0.41 \pm 0.11$                       | $0.42 \pm 0.09$                        | $0.40 \pm 0.13$                         | $0.40 \pm 0.14$                         |
|                                 | b    | $0.55 \pm 0.04$                  | $0.15 \pm 0.09$                       | $0.14 \pm 0.07$                        | $0.16 \pm 0.11$                         | $0.12 \pm 0.11$                         |
|                                 | ba   | $-0.04 \pm 0.03$                 | $-0.05 \pm 0.08$                      | $-0.05 \pm 0.07$                       | $0.03 \pm 0.10$                         | $-0.12 \pm 0.10$                        |
|                                 | bad  | $-0.22 \pm 0.04$                 | $0.05 \pm 0.08$                       | $0.05 \pm 0.07$                        | $0.14 \pm 0.09$                         | $-0.03 \pm 0.10$                        |
|                                 | badq | $-0.40 \pm 0.04$                 | $0.24 \pm 0.08$                       | $0.23 \pm 0.07$                        | $0.29 \pm 0.09$                         | $0.17 \pm 0.10$                         |
| $\text{C}_6\text{H}_{14}$       |      | $-0.43 \pm 0.03$                 | $-0.13 \pm 0.10$                      | $-0.13 \pm 0.08$                       | $0.02 \pm 0.11$                         | $-0.32 \pm 0.13$                        |
|                                 | b    | $-0.56 \pm 0.04$                 | $-0.01 \pm 0.10$                      | $0.02 \pm 0.08$                        | $0.13 \pm 0.10$                         | $-0.18 \pm 0.13$                        |
|                                 | ba   | $-0.45 \pm 0.08$                 | $-0.22 \pm 0.11$                      | $-0.19 \pm 0.09$                       | $-0.15 \pm 0.11$                        | $-0.24 \pm 0.11$                        |
|                                 | bad  | $-0.47 \pm 0.03$                 | $-0.11 \pm 0.09$                      | $-0.11 \pm 0.07$                       | $0.00 \pm 0.09$                         | $-0.22 \pm 0.10$                        |
|                                 | badq | $-0.47 \pm 0.03$                 | $-0.25 \pm 0.10$                      | $-0.25 \pm 0.07$                       | $-0.11 \pm 0.11$                        | $-0.38 \pm 0.11$                        |
| $\text{CH}_3\text{OH}$          |      | $-2.16 \pm 0.03$                 | $0.21 \pm 0.10$                       | $0.20 \pm 0.10$                        | $0.24 \pm 0.15$                         | $0.10 \pm 0.14$                         |
|                                 | b    | $-2.13 \pm 0.03$                 | $0.30 \pm 0.10$                       | $0.27 \pm 0.07$                        | $0.33 \pm 0.10$                         | $0.18 \pm 0.12$                         |
|                                 | ba   | $-2.13 \pm 0.03$                 | $-0.08 \pm 0.11$                      | $-0.07 \pm 0.10$                       | $0.07 \pm 0.17$                         | $-0.20 \pm 0.17$                        |
|                                 | bad  | $-1.99 \pm 0.04$                 | $-0.14 \pm 0.10$                      | $-0.16 \pm 0.08$                       | $-0.12 \pm 0.11$                        | $-0.23 \pm 0.12$                        |
|                                 | badq | $-1.99 \pm 0.04$                 | $-0.40 \pm 0.10$                      | $-0.41 \pm 0.08$                       | $-0.35 \pm 0.12$                        | $-0.45 \pm 0.12$                        |
| $\text{C}_2\text{H}_6$          |      | $0.05 \pm 0.02$                  | $-0.10 \pm 0.05$                      | $-0.10 \pm 0.04$                       | $-0.08 \pm 0.06$                        | $-0.11 \pm 0.06$                        |
|                                 | b    | $0.06 \pm 0.04$                  | $-0.06 \pm 0.06$                      | $-0.07 \pm 0.05$                       | $-0.07 \pm 0.07$                        | $-0.07 \pm 0.07$                        |
|                                 | ba   | $0.09 \pm 0.10$                  | $-0.06 \pm 0.11$                      | $-0.07 \pm 0.10$                       | $-0.07 \pm 0.11$                        | $-0.05 \pm 0.11$                        |
|                                 | bad  | $0.13 \pm 0.12$                  | $-0.06 \pm 0.13$                      | $-0.07 \pm 0.12$                       | $-0.07 \pm 0.13$                        | $-0.07 \pm 0.13$                        |
|                                 | badq | $0.07 \pm 0.08$                  | $-0.01 \pm 0.09$                      | $-0.02 \pm 0.09$                       | $-0.01 \pm 0.09$                        | $-0.02 \pm 0.09$                        |
| $(\text{CH}_2)_4\text{O}$       |      | $-1.97 \pm 0.05$                 | $-0.21 \pm 0.15$                      | $-0.25 \pm 0.12$                       | $0.07 \pm 0.19$                         | $-0.50 \pm 0.17$                        |
|                                 | b    | $-2.04 \pm 0.05$                 | $-0.30 \pm 0.17$                      | $-0.34 \pm 0.15$                       | $0.04 \pm 0.22$                         | $-0.61 \pm 0.21$                        |

Continued on next page

Table 9 – Continued from previous page

| Molec.                            | MM'  | $\Delta G_{\text{TI3}}^{N_i=11}$ | $\Delta\Delta G_{\text{TI}}^{N_i=6}$ | $\Delta\Delta G_{\text{BAR}}^{N_i=6}$ | $\Delta\Delta G_{\text{IEXP}}^{N_i=5}$ | $\Delta\Delta G_{\text{DEXP}}^{N_i=5}$ |
|-----------------------------------|------|----------------------------------|--------------------------------------|---------------------------------------|----------------------------------------|----------------------------------------|
|                                   | ba   | $-2.28 \pm 0.03$                 | $0.04 \pm 0.12$                      | $0.02 \pm 0.11$                       | $0.09 \pm 0.16$                        | $0.00 \pm 0.17$                        |
|                                   | bad  | $-2.20 \pm 0.03$                 | $-0.20 \pm 0.12$                     | $-0.24 \pm 0.12$                      | $-0.08 \pm 0.18$                       | $-0.41 \pm 0.17$                       |
|                                   | badq | $-2.16 \pm 0.03$                 | $-0.16 \pm 0.11$                     | $-0.16 \pm 0.10$                      | $-0.02 \pm 0.14$                       | $-0.26 \pm 0.13$                       |
| $\text{C}(\text{NH}_2)_3^+$       |      | $-0.97 \pm 0.06$                 | $0.06 \pm 0.23$                      | $0.08 \pm 0.21$                       | $0.42 \pm 0.26$                        | $-0.19 \pm 0.32$                       |
|                                   | b    | $-0.24 \pm 0.06$                 | $-0.03 \pm 0.16$                     | $-0.01 \pm 0.16$                      | $0.15 \pm 0.21$                        | $-0.21 \pm 0.23$                       |
|                                   | ba   | $-0.60 \pm 0.05$                 | $-0.30 \pm 0.15$                     | $-0.32 \pm 0.16$                      | $-0.14 \pm 0.26$                       | $-0.44 \pm 0.21$                       |
|                                   | bad  | $-0.36 \pm 0.05$                 | $-0.30 \pm 0.13$                     | $-0.32 \pm 0.11$                      | $-0.03 \pm 0.18$                       | $-0.46 \pm 0.16$                       |
|                                   | badq | $-0.02 \pm 0.05$                 | $0.01 \pm 0.14$                      | $0.03 \pm 0.11$                       | $0.09 \pm 0.16$                        | $-0.02 \pm 0.15$                       |
| $\text{C}_6\text{H}_5\text{NH}_2$ |      | $-3.04 \pm 0.04$                 | $0.16 \pm 0.15$                      | $0.18 \pm 0.13$                       | $0.58 \pm 0.18$                        | $-0.16 \pm 0.19$                       |
|                                   | b    | $-3.06 \pm 0.04$                 | $-0.02 \pm 0.13$                     | $-0.03 \pm 0.12$                      | $0.19 \pm 0.19$                        | $-0.19 \pm 0.17$                       |
|                                   | ba   | $-3.09 \pm 0.05$                 | $-0.03 \pm 0.12$                     | $-0.04 \pm 0.10$                      | $0.20 \pm 0.17$                        | $-0.20 \pm 0.14$                       |
|                                   | bad  | $-3.22 \pm 0.04$                 | $0.13 \pm 0.11$                      | $0.11 \pm 0.09$                       | $0.18 \pm 0.13$                        | $-0.00 \pm 0.16$                       |
|                                   | badq | $-3.26 \pm 0.08$                 | $0.07 \pm 0.21$                      | $0.13 \pm 0.16$                       | $0.15 \pm 0.23$                        | $-0.11 \pm 0.29$                       |
| $\text{CH}_3\text{CONH}_2$        |      | $-3.59 \pm 0.05$                 | $0.14 \pm 0.15$                      | $0.17 \pm 0.16$                       | $0.40 \pm 0.22$                        | $-0.08 \pm 0.26$                       |
|                                   | b    | $-3.41 \pm 0.04$                 | $0.40 \pm 0.15$                      | $0.38 \pm 0.12$                       | $0.66 \pm 0.17$                        | $0.18 \pm 0.17$                        |
|                                   | ba   | $-3.52 \pm 0.05$                 | $0.08 \pm 0.14$                      | $0.10 \pm 0.14$                       | $0.24 \pm 0.22$                        | $-0.06 \pm 0.24$                       |
|                                   | bad  | $-3.50 \pm 0.04$                 | $0.26 \pm 0.12$                      | $0.23 \pm 0.13$                       | $0.41 \pm 0.23$                        | $0.06 \pm 0.23$                        |
|                                   | badq | $-3.59 \pm 0.04$                 | $0.08 \pm 0.11$                      | $0.10 \pm 0.10$                       | $0.20 \pm 0.14$                        | $0.01 \pm 0.15$                        |
| $\text{H}_2\text{O}$              |      | $-3.62 \pm 0.03$                 | $0.10 \pm 0.11$                      | $0.10 \pm 0.11$                       | $0.18 \pm 0.14$                        | $-0.04 \pm 0.21$                       |
|                                   | b    | $-3.72 \pm 0.03$                 | $-0.08 \pm 0.10$                     | $-0.06 \pm 0.11$                      | $-0.07 \pm 0.17$                       | $-0.02 \pm 0.17$                       |
|                                   | ba   | $-3.78 \pm 0.03$                 | $0.00 \pm 0.10$                      | $0.02 \pm 0.08$                       | $-0.02 \pm 0.12$                       | $0.04 \pm 0.14$                        |
|                                   | bad  | $-3.79 \pm 0.03$                 | $0.00 \pm 0.10$                      | $0.02 \pm 0.08$                       | $-0.02 \pm 0.12$                       | $0.04 \pm 0.14$                        |
|                                   | badq | $-3.72 \pm 0.03$                 | $0.07 \pm 0.10$                      | $0.08 \pm 0.10$                       | $0.16 \pm 0.17$                        | $-0.01 \pm 0.16$                       |
| $\text{C}_2\text{H}_5\text{OH}$   |      | $-2.71 \pm 0.04$                 | $0.13 \pm 0.12$                      | $0.12 \pm 0.09$                       | $0.23 \pm 0.14$                        | $-0.06 \pm 0.17$                       |

Continued on next page

Table 9 – Continued from previous page

| Molec.                          | MM'  | $\Delta G_{\text{TI3}}^{N_i=11}$ | $\Delta\Delta G_{\text{TI}}^{N_i=6}$ | $\Delta\Delta G_{\text{BAR}}^{N_i=6}$ | $\Delta\Delta G_{\text{IEXP}}^{N_i=5}$ | $\Delta\Delta G_{\text{DEXP}}^{N_i=5}$ |
|---------------------------------|------|----------------------------------|--------------------------------------|---------------------------------------|----------------------------------------|----------------------------------------|
|                                 | b    | $-2.60 \pm 0.04$                 | $-0.27 \pm 0.11$                     | $-0.28 \pm 0.09$                      | $-0.18 \pm 0.15$                       | $-0.34 \pm 0.15$                       |
|                                 | ba   | $-2.72 \pm 0.05$                 | $-0.09 \pm 0.12$                     | $-0.09 \pm 0.11$                      | $0.04 \pm 0.15$                        | $-0.19 \pm 0.16$                       |
|                                 | bad  | $-2.79 \pm 0.05$                 | $-0.13 \pm 0.12$                     | $-0.15 \pm 0.11$                      | $-0.02 \pm 0.19$                       | $-0.18 \pm 0.17$                       |
|                                 | badq | $-2.83 \pm 0.04$                 | $0.14 \pm 0.11$                      | $0.16 \pm 0.11$                       | $0.24 \pm 0.15$                        | $0.07 \pm 0.19$                        |
| $\text{C}_6\text{H}_6$          |      | $-0.94 \pm 0.02$                 | $0.20 \pm 0.06$                      | $0.20 \pm 0.05$                       | $0.29 \pm 0.08$                        | $0.09 \pm 0.07$                        |
|                                 | b    | $-0.86 \pm 0.02$                 | $-0.01 \pm 0.07$                     | $0.00 \pm 0.05$                       | $0.08 \pm 0.09$                        | $-0.06 \pm 0.08$                       |
|                                 | ba   | $-0.70 \pm 0.08$                 | $-0.01 \pm 0.10$                     | $0.00 \pm 0.09$                       | $0.04 \pm 0.11$                        | $-0.08 \pm 0.11$                       |
|                                 | bad  | $-0.59 \pm 0.16$                 | $-0.02 \pm 0.17$                     | $-0.01 \pm 0.17$                      | $0.02 \pm 0.18$                        | $-0.04 \pm 0.18$                       |
|                                 | badq | $-0.67 \pm 0.02$                 | $0.04 \pm 0.05$                      | $0.03 \pm 0.04$                       | $0.06 \pm 0.05$                        | $0.01 \pm 0.06$                        |
| $\text{C}_6\text{H}_5\text{OH}$ |      | $-2.17 \pm 0.03$                 | $0.04 \pm 0.11$                      | $0.06 \pm 0.10$                       | $0.12 \pm 0.14$                        | $-0.06 \pm 0.15$                       |
|                                 | b    | $-2.13 \pm 0.04$                 | $-0.10 \pm 0.09$                     | $-0.12 \pm 0.08$                      | $-0.05 \pm 0.12$                       | $-0.20 \pm 0.11$                       |
|                                 | ba   | $-2.26 \pm 0.03$                 | $0.02 \pm 0.09$                      | $0.02 \pm 0.08$                       | $0.01 \pm 0.12$                        | $0.01 \pm 0.12$                        |
|                                 | bad  | $-2.22 \pm 0.03$                 | $-0.19 \pm 0.09$                     | $-0.18 \pm 0.08$                      | $-0.23 \pm 0.12$                       | $-0.16 \pm 0.13$                       |
|                                 | badq | $-2.36 \pm 0.06$                 | $-0.02 \pm 0.18$                     | $-0.01 \pm 0.15$                      | $-0.23 \pm 0.20$                       | $0.13 \pm 0.27$                        |

Table 10: MM-to-QM net solvation free energy correction values from 2- $\lambda$  states simulated for 20 ps

| Molec.                     | MM'  | $\Delta G_{\text{TI3}}^{N_\lambda=11}$ | $\Delta\Delta G_{\text{TI}}^{N_\lambda=2}$ | $\Delta\Delta G_{\text{BAR}}^{N_\lambda=2}$ | $\Delta\Delta G_{\text{IEXP}}^{N_\lambda=1}$ | $\Delta\Delta G_{\text{DEXP}}^{N_\lambda=1}$ |
|----------------------------|------|----------------------------------------|--------------------------------------------|---------------------------------------------|----------------------------------------------|----------------------------------------------|
| $\text{CO}_3^{2-}$         |      | $-6.45 \pm 0.12$                       | $2.99 \pm 1.93$                            | $1.14 \pm 0.97$                             | $-1.60 \pm 0.71$                             | $3.87 \pm 0.65$                              |
|                            | b    | $-6.47 \pm 0.07$                       | $1.46 \pm 0.70$                            | $-0.25 \pm 0.61$                            | $-3.54 \pm 0.42$                             | $3.24 \pm 0.49$                              |
|                            | ba   | $-6.13 \pm 0.06$                       | $0.31 \pm 0.62$                            | $-1.53 \pm 0.57$                            | $-3.17 \pm 0.39$                             | $0.02 \pm 0.45$                              |
|                            | bad  | $-6.09 \pm 0.06$                       | $1.54 \pm 0.66$                            | $0.60 \pm 0.48$                             | $-3.12 \pm 0.39$                             | $4.41 \pm 0.33$                              |
|                            | badq | $-6.07 \pm 0.06$                       | $1.33 \pm 0.46$                            | $-0.32 \pm 0.66$                            | $-2.52 \pm 0.36$                             | $1.89 \pm 0.57$                              |
| $\text{CH}_3\text{NH}_3^+$ |      | $1.79 \pm 0.04$                        | $0.26 \pm 0.48$                            | $-0.02 \pm 0.48$                            | $0.19 \pm 0.59$                              | $0.42 \pm 0.45$                              |
|                            | b    | $1.89 \pm 0.03$                        | $-0.19 \pm 0.24$                           | $-0.32 \pm 0.26$                            | $0.17 \pm 0.33$                              | $-0.85 \pm 0.29$                             |
|                            | ba   | $1.89 \pm 0.03$                        | $-0.10 \pm 0.20$                           | $-0.12 \pm 0.21$                            | $-0.05 \pm 0.26$                             | $-0.50 \pm 0.28$                             |
|                            | bad  | $1.79 \pm 0.04$                        | $-0.01 \pm 0.16$                           | $0.01 \pm 0.16$                             | $-0.13 \pm 0.21$                             | $0.29 \pm 0.17$                              |
|                            | badq | $1.80 \pm 0.03$                        | $-0.02 \pm 0.18$                           | $-0.05 \pm 0.18$                            | $-0.12 \pm 0.26$                             | $0.06 \pm 0.22$                              |
| $\text{NH}_4^+$            |      | $5.64 \pm 0.04$                        | $0.43 \pm 0.25$                            | $0.14 \pm 0.36$                             | $-1.42 \pm 0.18$                             | $1.60 \pm 0.37$                              |
|                            | b    | $5.69 \pm 0.02$                        | $-0.01 \pm 0.09$                           | $-0.02 \pm 0.08$                            | $0.01 \pm 0.11$                              | $-0.06 \pm 0.09$                             |
|                            | ba   | $5.68 \pm 0.01$                        | $-0.03 \pm 0.08$                           | $-0.03 \pm 0.07$                            | $-0.06 \pm 0.11$                             | $0.01 \pm 0.10$                              |
|                            | bad  | $5.68 \pm 0.01$                        | $-0.03 \pm 0.08$                           | $-0.03 \pm 0.07$                            | $-0.06 \pm 0.11$                             | $0.01 \pm 0.10$                              |
|                            | badq | $5.70 \pm 0.02$                        | $0.03 \pm 0.07$                            | $0.02 \pm 0.07$                             | $0.02 \pm 0.10$                              | $0.04 \pm 0.08$                              |
| $\text{CH}_3\text{CO}_2^-$ |      | $-9.33 \pm 0.08$                       | $-1.43 \pm 0.99$                           | $-0.55 \pm 0.82$                            | $-6.22 \pm 0.53$                             | $5.83 \pm 0.75$                              |
|                            | b    | $-9.52 \pm 0.07$                       | $0.38 \pm 0.72$                            | $0.11 \pm 0.71$                             | $-0.10 \pm 0.50$                             | $0.42 \pm 0.57$                              |
|                            | ba   | $-9.29 \pm 0.05$                       | $-0.60 \pm 0.46$                           | $-0.83 \pm 0.60$                            | $-1.84 \pm 0.57$                             | $-0.22 \pm 0.47$                             |
|                            | bad  | $-9.14 \pm 0.05$                       | $-0.11 \pm 0.56$                           | $-0.31 \pm 0.53$                            | $-2.07 \pm 0.51$                             | $2.01 \pm 0.40$                              |
|                            | badq | $-9.27 \pm 0.07$                       | $-0.31 \pm 0.64$                           | $-1.84 \pm 0.77$                            | $-3.16 \pm 0.54$                             | $-0.38 \pm 0.62$                             |
| $\text{H}_3\text{O}^+$     |      | $6.51 \pm 0.05$                        | $0.91 \pm 0.78$                            | $-0.35 \pm 0.62$                            | $-0.86 \pm 0.42$                             | $-0.84 \pm 0.64$                             |
|                            | b    | $6.42 \pm 0.04$                        | $0.33 \pm 0.55$                            | $0.38 \pm 0.54$                             | $0.21 \pm 0.62$                              | $0.42 \pm 0.55$                              |
|                            | ba   | $6.35 \pm 0.02$                        | $-0.09 \pm 0.16$                           | $-0.11 \pm 0.15$                            | $0.11 \pm 0.19$                              | $-0.18 \pm 0.20$                             |

*Continued on next page*

Table 10 – Continued from previous page

| Molec.                          | MM'  | $\Delta G_{\text{TI3}}^{N_i=11}$ | $\Delta \Delta G_{\text{TI}}^{N_i=2}$ | $\Delta \Delta G_{\text{BAR}}^{N_i=2}$ | $\Delta \Delta G_{\text{IEXP}}^{N_i=1}$ | $\Delta \Delta G_{\text{DEXP}}^{N_i=1}$ |
|---------------------------------|------|----------------------------------|---------------------------------------|----------------------------------------|-----------------------------------------|-----------------------------------------|
|                                 | bad  | $6.35 \pm 0.02$                  | $-0.09 \pm 0.16$                      | $-0.11 \pm 0.15$                       | $0.11 \pm 0.19$                         | $-0.18 \pm 0.20$                        |
|                                 | badq | $6.41 \pm 0.02$                  | $-0.38 \pm 0.17$                      | $-0.38 \pm 0.15$                       | $0.00 \pm 0.24$                         | $-0.80 \pm 0.22$                        |
| $\text{C}_6\text{H}_5\text{Cl}$ |      | $0.38 \pm 0.04$                  | $0.05 \pm 0.42$                       | $0.73 \pm 0.44$                        | $0.27 \pm 0.54$                         | $2.04 \pm 0.54$                         |
|                                 | b    | $0.55 \pm 0.04$                  | $0.16 \pm 0.35$                       | $0.18 \pm 0.34$                        | $-0.12 \pm 0.42$                        | $-0.01 \pm 0.50$                        |
|                                 | ba   | $-0.04 \pm 0.03$                 | $-0.03 \pm 0.28$                      | $-0.02 \pm 0.28$                       | $0.17 \pm 0.26$                         | $0.03 \pm 0.36$                         |
|                                 | bad  | $-0.22 \pm 0.04$                 | $0.15 \pm 0.28$                       | $0.15 \pm 0.34$                        | $-0.20 \pm 0.37$                        | $0.22 \pm 0.42$                         |
|                                 | badq | $-0.40 \pm 0.04$                 | $-0.12 \pm 0.33$                      | $-0.07 \pm 0.32$                       | $-0.37 \pm 0.28$                        | $0.32 \pm 0.28$                         |
| $\text{C}_6\text{H}_{14}$       |      | $-0.43 \pm 0.03$                 | $0.04 \pm 0.27$                       | $-0.32 \pm 0.40$                       | $-0.73 \pm 0.28$                        | $-0.64 \pm 0.43$                        |
|                                 | b    | $-0.56 \pm 0.04$                 | $-0.19 \pm 0.26$                      | $-0.40 \pm 0.29$                       | $-0.17 \pm 0.37$                        | $-0.77 \pm 0.38$                        |
|                                 | ba   | $-0.45 \pm 0.08$                 | $0.03 \pm 0.32$                       | $-0.17 \pm 0.33$                       | $-0.87 \pm 0.37$                        | $0.78 \pm 0.34$                         |
|                                 | bad  | $-0.47 \pm 0.03$                 | $-0.46 \pm 0.25$                      | $-0.54 \pm 0.29$                       | $-0.79 \pm 0.36$                        | $-0.66 \pm 0.42$                        |
|                                 | badq | $-0.47 \pm 0.03$                 | $-0.33 \pm 0.26$                      | $-0.44 \pm 0.35$                       | $-1.00 \pm 0.42$                        | $0.05 \pm 0.30$                         |
| $\text{CH}_3\text{OH}$          |      | $-2.16 \pm 0.03$                 | $0.27 \pm 0.29$                       | $0.30 \pm 0.54$                        | $-0.62 \pm 0.51$                        | $1.59 \pm 0.33$                         |
|                                 | b    | $-2.13 \pm 0.03$                 | $-0.21 \pm 0.24$                      | $-0.03 \pm 0.30$                       | $-1.05 \pm 0.19$                        | $1.26 \pm 0.27$                         |
|                                 | ba   | $-2.13 \pm 0.03$                 | $-0.07 \pm 0.27$                      | $-0.34 \pm 0.52$                       | $-1.10 \pm 0.44$                        | $0.42 \pm 0.39$                         |
|                                 | bad  | $-1.99 \pm 0.04$                 | $-0.41 \pm 0.24$                      | $-0.26 \pm 0.41$                       | $-1.10 \pm 0.42$                        | $0.80 \pm 0.24$                         |
|                                 | badq | $-1.99 \pm 0.04$                 | $-0.46 \pm 0.31$                      | $-0.71 \pm 0.40$                       | $-1.06 \pm 0.23$                        | $-1.11 \pm 0.51$                        |
| $\text{C}_2\text{H}_6$          |      | $0.05 \pm 0.02$                  | $0.01 \pm 0.16$                       | $-0.01 \pm 0.15$                       | $0.02 \pm 0.18$                         | $-0.49 \pm 0.32$                        |
|                                 | b    | $0.06 \pm 0.04$                  | $0.08 \pm 0.17$                       | $0.01 \pm 0.20$                        | $-0.19 \pm 0.13$                        | $-0.08 \pm 0.29$                        |
|                                 | ba   | $0.09 \pm 0.10$                  | $-0.03 \pm 0.14$                      | $-0.05 \pm 0.15$                       | $-0.27 \pm 0.12$                        | $0.01 \pm 0.21$                         |
|                                 | bad  | $0.13 \pm 0.12$                  | $-0.05 \pm 0.16$                      | $-0.07 \pm 0.16$                       | $-0.26 \pm 0.14$                        | $-0.13 \pm 0.26$                        |
|                                 | badq | $0.07 \pm 0.08$                  | $0.01 \pm 0.16$                       | $-0.06 \pm 0.12$                       | $-0.25 \pm 0.11$                        | $-0.02 \pm 0.14$                        |
| $(\text{CH}_2)_4\text{O}$       |      | $-1.97 \pm 0.05$                 | $-0.18 \pm 0.65$                      | $0.17 \pm 0.80$                        | $1.23 \pm 0.60$                         | $-0.57 \pm 0.60$                        |
|                                 | b    | $-2.04 \pm 0.05$                 | $-1.34 \pm 0.69$                      | $-0.82 \pm 0.80$                       | $1.07 \pm 0.60$                         | $-1.77 \pm 0.61$                        |

Continued on next page



Table 10 – Continued from previous page

| Molec.                            | MM'  | $\Delta G_{\text{TI3}}^{N_i=11}$ | $\Delta \Delta G_{\text{TI}}^{N_i=2}$ | $\Delta \Delta G_{\text{BAR}}^{N_i=2}$ | $\Delta \Delta G_{\text{IEXP}}^{N_i=1}$ | $\Delta \Delta G_{\text{DEXP}}^{N_i=1}$ |
|-----------------------------------|------|----------------------------------|---------------------------------------|----------------------------------------|-----------------------------------------|-----------------------------------------|
|                                   | ba   | $-2.28 \pm 0.03$                 | $-0.44 \pm 0.32$                      | $0.10 \pm 0.56$                        | $-0.27 \pm 0.55$                        | $1.00 \pm 0.40$                         |
|                                   | bad  | $-2.20 \pm 0.03$                 | $-0.95 \pm 0.38$                      | $-0.79 \pm 0.52$                       | $-0.44 \pm 0.53$                        | $-0.46 \pm 0.48$                        |
|                                   | badq | $-2.16 \pm 0.03$                 | $0.44 \pm 0.37$                       | $-0.08 \pm 0.33$                       | $-0.68 \pm 0.21$                        | $0.45 \pm 0.33$                         |
| $\text{C}(\text{NH}_2)_3^+$       |      | $-0.97 \pm 0.06$                 | $0.80 \pm 0.83$                       | $-0.60 \pm 0.80$                       | $-2.63 \pm 0.35$                        | $3.86 \pm 0.79$                         |
|                                   | b    | $-0.24 \pm 0.06$                 | $-3.88 \pm 1.25$                      | $-1.63 \pm 0.72$                       | $0.21 \pm 0.40$                         | $-5.80 \pm 0.71$                        |
|                                   | ba   | $-0.60 \pm 0.05$                 | $0.56 \pm 0.66$                       | $-0.02 \pm 0.46$                       | $-0.16 \pm 0.40$                        | $0.17 \pm 0.43$                         |
|                                   | bad  | $-0.36 \pm 0.05$                 | $0.14 \pm 0.46$                       | $-0.12 \pm 0.43$                       | $-0.55 \pm 0.45$                        | $0.06 \pm 0.50$                         |
|                                   | badq | $-0.02 \pm 0.05$                 | $-0.28 \pm 0.46$                      | $-0.14 \pm 0.48$                       | $-0.37 \pm 0.43$                        | $-0.20 \pm 0.54$                        |
| $\text{C}_6\text{H}_5\text{NH}_2$ |      | $-3.04 \pm 0.04$                 | $-0.23 \pm 0.42$                      | $0.17 \pm 0.75$                        | $-0.52 \pm 0.57$                        | $0.98 \pm 0.54$                         |
|                                   | b    | $-3.06 \pm 0.04$                 | $-0.20 \pm 0.43$                      | $0.06 \pm 0.65$                        | $0.30 \pm 0.58$                         | $0.14 \pm 0.35$                         |
|                                   | ba   | $-3.09 \pm 0.05$                 | $-1.11 \pm 0.35$                      | $-0.62 \pm 0.47$                       | $-1.52 \pm 0.49$                        | $0.66 \pm 0.22$                         |
|                                   | bad  | $-3.22 \pm 0.04$                 | $-0.56 \pm 0.42$                      | $-0.37 \pm 0.56$                       | $-1.42 \pm 0.47$                        | $0.92 \pm 0.42$                         |
|                                   | badq | $-3.26 \pm 0.08$                 | $-0.73 \pm 0.85$                      | $0.37 \pm 0.58$                        | $-1.21 \pm 0.41$                        | $2.32 \pm 0.51$                         |
| $\text{CH}_3\text{CONH}_2$        |      | $-3.59 \pm 0.05$                 | $0.86 \pm 0.37$                       | $0.64 \pm 0.65$                        | $-0.83 \pm 0.37$                        | $2.04 \pm 0.56$                         |
|                                   | b    | $-3.41 \pm 0.04$                 | $0.66 \pm 0.38$                       | $0.97 \pm 0.47$                        | $-0.27 \pm 0.37$                        | $2.33 \pm 0.34$                         |
|                                   | ba   | $-3.52 \pm 0.05$                 | $-0.29 \pm 0.26$                      | $-0.51 \pm 0.35$                       | $-0.92 \pm 0.22$                        | $-0.27 \pm 0.33$                        |
|                                   | bad  | $-3.50 \pm 0.04$                 | $-0.10 \pm 0.26$                      | $-0.19 \pm 0.31$                       | $-0.91 \pm 0.22$                        | $0.49 \pm 0.27$                         |
|                                   | badq | $-3.59 \pm 0.04$                 | $0.73 \pm 0.29$                       | $0.36 \pm 0.31$                        | $-0.01 \pm 0.20$                        | $0.51 \pm 0.30$                         |
| $\text{H}_2\text{O}$              |      | $-3.62 \pm 0.03$                 | $0.44 \pm 0.27$                       | $0.57 \pm 0.26$                        | $-0.22 \pm 0.23$                        | $1.46 \pm 0.16$                         |
|                                   | b    | $-3.72 \pm 0.03$                 | $0.44 \pm 0.33$                       | $0.27 \pm 0.36$                        | $0.29 \pm 0.41$                         | $0.61 \pm 0.37$                         |
|                                   | ba   | $-3.78 \pm 0.03$                 | $0.14 \pm 0.27$                       | $0.26 \pm 0.32$                        | $0.67 \pm 0.43$                         | $0.28 \pm 0.40$                         |
|                                   | bad  | $-3.79 \pm 0.03$                 | $0.14 \pm 0.27$                       | $0.26 \pm 0.32$                        | $0.67 \pm 0.43$                         | $0.28 \pm 0.40$                         |
|                                   | badq | $-3.72 \pm 0.03$                 | $0.28 \pm 0.27$                       | $0.39 \pm 0.33$                        | $0.66 \pm 0.42$                         | $0.66 \pm 0.29$                         |
| $\text{C}_2\text{H}_5\text{OH}$   |      | $-2.71 \pm 0.04$                 | $-0.39 \pm 0.36$                      | $-0.24 \pm 0.60$                       | $-0.80 \pm 0.43$                        | $-0.04 \pm 0.54$                        |

Continued on next page

Table 10 – Continued from previous page

| Molec.                          | MM'  | $\Delta G_{\text{TI3}}^{N_\lambda=11}$ | $\Delta\Delta G_{\text{TI}}^{N_\lambda=2}$ | $\Delta\Delta G_{\text{BAR}}^{N_\lambda=2}$ | $\Delta\Delta G_{\text{IEXP}}^{N_\lambda=1}$ | $\Delta\Delta G_{\text{DEXP}}^{N_\lambda=1}$ |
|---------------------------------|------|----------------------------------------|--------------------------------------------|---------------------------------------------|----------------------------------------------|----------------------------------------------|
|                                 | b    | $-2.60 \pm 0.04$                       | $-0.15 \pm 0.32$                           | $0.11 \pm 0.61$                             | $-1.07 \pm 0.52$                             | $1.27 \pm 0.40$                              |
|                                 | ba   | $-2.72 \pm 0.05$                       | $-0.15 \pm 0.40$                           | $-0.25 \pm 0.50$                            | $-0.43 \pm 0.36$                             | $0.28 \pm 0.55$                              |
|                                 | bad  | $-2.79 \pm 0.05$                       | $-0.19 \pm 0.39$                           | $-0.15 \pm 0.51$                            | $-0.44 \pm 0.35$                             | $-0.27 \pm 0.54$                             |
|                                 | badq | $-2.83 \pm 0.04$                       | $-0.22 \pm 0.38$                           | $-0.21 \pm 0.37$                            | $-0.51 \pm 0.33$                             | $0.30 \pm 0.31$                              |
| $\text{C}_6\text{H}_6$          |      | $-0.94 \pm 0.02$                       | $-0.13 \pm 0.23$                           | $-0.12 \pm 0.27$                            | $-0.09 \pm 0.29$                             | $-0.17 \pm 0.28$                             |
|                                 | b    | $-0.86 \pm 0.02$                       | $0.00 \pm 0.19$                            | $0.10 \pm 0.22$                             | $-0.12 \pm 0.25$                             | $0.48 \pm 0.21$                              |
|                                 | ba   | $-0.70 \pm 0.08$                       | $-0.10 \pm 0.20$                           | $-0.08 \pm 0.20$                            | $-0.13 \pm 0.23$                             | $-0.02 \pm 0.21$                             |
|                                 | bad  | $-0.59 \pm 0.16$                       | $-0.35 \pm 0.25$                           | $-0.30 \pm 0.25$                            | $-0.22 \pm 0.26$                             | $-0.67 \pm 0.32$                             |
|                                 | badq | $-0.67 \pm 0.02$                       | $-0.12 \pm 0.18$                           | $-0.05 \pm 0.20$                            | $-0.20 \pm 0.19$                             | $-0.10 \pm 0.30$                             |
| $\text{C}_6\text{H}_5\text{OH}$ |      | $-2.17 \pm 0.03$                       | $0.55 \pm 0.36$                            | $0.56 \pm 0.38$                             | $0.22 \pm 0.37$                              | $1.20 \pm 0.28$                              |
|                                 | b    | $-2.13 \pm 0.04$                       | $0.06 \pm 0.29$                            | $0.30 \pm 0.33$                             | $1.01 \pm 0.51$                              | $0.64 \pm 0.27$                              |
|                                 | ba   | $-2.26 \pm 0.03$                       | $0.33 \pm 0.42$                            | $0.25 \pm 0.35$                             | $1.81 \pm 0.55$                              | $-1.09 \pm 0.55$                             |
|                                 | bad  | $-2.22 \pm 0.03$                       | $0.64 \pm 0.32$                            | $0.75 \pm 0.42$                             | $1.73 \pm 0.55$                              | $0.97 \pm 0.43$                              |
|                                 | badq | $-2.36 \pm 0.06$                       | $0.53 \pm 0.52$                            | $2.76 \pm 0.66$                             | $0.34 \pm 0.53$                              | $5.23 \pm 0.40$                              |

Table 11: MM-to-QM net solvation free energy correction values from 3- $\lambda$  states simulated for 20 ps

| Molec.                     | MM'  | $\Delta G_{\text{TI}3}^{N_\lambda=11}$ | $\Delta\Delta G_{\text{TI}}^{N_\lambda=3}$ | $\Delta\Delta G_{\text{BAR}}^{N_\lambda=3}$ | $\Delta\Delta G_{\text{IEXP}}^{N_\lambda=2}$ | $\Delta\Delta G_{\text{DEXP}}^{N_\lambda=2}$ |
|----------------------------|------|----------------------------------------|--------------------------------------------|---------------------------------------------|----------------------------------------------|----------------------------------------------|
| $\text{CO}_3^{2-}$         |      | $-6.45 \pm 0.12$                       | $1.29 \pm 1.75$                            | $0.42 \pm 0.97$                             | $-1.34 \pm 0.74$                             | $2.06 \pm 0.70$                              |
|                            | b    | $-6.47 \pm 0.07$                       | $0.19 \pm 0.41$                            | $-0.26 \pm 0.42$                            | $-2.09 \pm 0.31$                             | $1.33 \pm 0.45$                              |
|                            | ba   | $-6.13 \pm 0.06$                       | $-0.97 \pm 0.47$                           | $-1.24 \pm 0.40$                            | $-1.82 \pm 0.36$                             | $-1.04 \pm 0.49$                             |
|                            | bad  | $-6.09 \pm 0.06$                       | $-0.31 \pm 0.44$                           | $-0.36 \pm 0.36$                            | $-2.02 \pm 0.32$                             | $1.12 \pm 0.37$                              |
|                            | badq | $-6.07 \pm 0.06$                       | $-0.37 \pm 0.39$                           | $-0.27 \pm 0.49$                            | $-1.69 \pm 0.32$                             | $0.23 \pm 0.63$                              |
| $\text{CH}_3\text{NH}_3^+$ |      | $1.79 \pm 0.04$                        | $0.29 \pm 0.34$                            | $0.16 \pm 0.29$                             | $0.16 \pm 0.43$                              | $0.32 \pm 0.35$                              |
|                            | b    | $1.89 \pm 0.03$                        | $0.30 \pm 0.21$                            | $0.19 \pm 0.16$                             | $0.42 \pm 0.23$                              | $-0.10 \pm 0.20$                             |
|                            | ba   | $1.89 \pm 0.03$                        | $0.30 \pm 0.19$                            | $0.22 \pm 0.15$                             | $0.32 \pm 0.19$                              | $0.02 \pm 0.20$                              |
|                            | bad  | $1.79 \pm 0.04$                        | $-0.02 \pm 0.12$                           | $-0.01 \pm 0.11$                            | $-0.10 \pm 0.15$                             | $0.11 \pm 0.12$                              |
|                            | badq | $1.80 \pm 0.03$                        | $-0.01 \pm 0.14$                           | $-0.02 \pm 0.11$                            | $-0.09 \pm 0.16$                             | $0.05 \pm 0.14$                              |
| $\text{NH}_4^+$            |      | $5.64 \pm 0.04$                        | $-0.36 \pm 0.35$                           | $-0.18 \pm 0.25$                            | $-0.64 \pm 0.29$                             | $0.07 \pm 0.30$                              |
|                            | b    | $5.69 \pm 0.02$                        | $-0.02 \pm 0.05$                           | $-0.03 \pm 0.05$                            | $-0.03 \pm 0.06$                             | $-0.03 \pm 0.07$                             |
|                            | ba   | $5.68 \pm 0.01$                        | $-0.09 \pm 0.07$                           | $-0.08 \pm 0.06$                            | $-0.10 \pm 0.09$                             | $-0.06 \pm 0.08$                             |
|                            | bad  | $5.68 \pm 0.01$                        | $-0.09 \pm 0.07$                           | $-0.08 \pm 0.06$                            | $-0.10 \pm 0.09$                             | $-0.06 \pm 0.08$                             |
|                            | badq | $5.70 \pm 0.02$                        | $-0.03 \pm 0.09$                           | $-0.02 \pm 0.06$                            | $-0.01 \pm 0.09$                             | $-0.03 \pm 0.09$                             |
| $\text{CH}_3\text{CO}_2^-$ |      | $-9.33 \pm 0.08$                       | $0.14 \pm 0.75$                            | $0.22 \pm 0.67$                             | $-1.76 \pm 0.60$                             | $3.03 \pm 0.68$                              |
|                            | b    | $-9.52 \pm 0.07$                       | $0.22 \pm 0.59$                            | $-0.04 \pm 0.46$                            | $0.64 \pm 0.61$                              | $-0.02 \pm 0.55$                             |
|                            | ba   | $-9.29 \pm 0.05$                       | $-1.27 \pm 0.33$                           | $-1.21 \pm 0.34$                            | $-1.59 \pm 0.41$                             | $-1.01 \pm 0.40$                             |
|                            | bad  | $-9.14 \pm 0.05$                       | $0.49 \pm 0.46$                            | $0.20 \pm 0.38$                             | $-0.58 \pm 0.45$                             | $1.22 \pm 0.39$                              |
|                            | badq | $-9.27 \pm 0.07$                       | $-0.50 \pm 0.55$                           | $-0.45 \pm 0.63$                            | $-0.75 \pm 0.67$                             | $-0.17 \pm 0.66$                             |
| $\text{H}_3\text{O}^+$     |      | $6.51 \pm 0.05$                        | $0.63 \pm 0.62$                            | $0.59 \pm 0.44$                             | $-0.25 \pm 0.40$                             | $-0.88 \pm 0.78$                             |
|                            | b    | $6.42 \pm 0.04$                        | $-0.70 \pm 0.47$                           | $-0.47 \pm 0.43$                            | $-0.59 \pm 0.48$                             | $-0.84 \pm 0.62$                             |
|                            | ba   | $6.35 \pm 0.02$                        | $0.02 \pm 0.14$                            | $0.00 \pm 0.10$                             | $0.11 \pm 0.14$                              | $-0.08 \pm 0.13$                             |

*Continued on next page*

Table 11 – *Continued from previous page*

| Molec.                          | MM'  | $\Delta G_{\text{TI3}}^{N_i=11}$ | $\Delta \Delta G_{\text{TI}}^{N_i=3}$ | $\Delta \Delta G_{\text{BAR}}^{N_i=3}$ | $\Delta \Delta G_{\text{IEXP}}^{N_i=2}$ | $\Delta \Delta G_{\text{DEXP}}^{N_i=2}$ |
|---------------------------------|------|----------------------------------|---------------------------------------|----------------------------------------|-----------------------------------------|-----------------------------------------|
|                                 | bad  | $6.35 \pm 0.02$                  | $0.02 \pm 0.14$                       | $0.00 \pm 0.10$                        | $0.11 \pm 0.14$                         | $-0.08 \pm 0.13$                        |
|                                 | badq | $6.41 \pm 0.02$                  | $-0.20 \pm 0.14$                      | $-0.24 \pm 0.12$                       | $-0.05 \pm 0.17$                        | $-0.42 \pm 0.15$                        |
| $\text{C}_6\text{H}_5\text{Cl}$ |      | $0.38 \pm 0.04$                  | $0.05 \pm 0.30$                       | $0.14 \pm 0.27$                        | $-0.07 \pm 0.40$                        | $0.87 \pm 0.35$                         |
|                                 | b    | $0.55 \pm 0.04$                  | $-0.18 \pm 0.26$                      | $-0.11 \pm 0.24$                       | $-0.27 \pm 0.29$                        | $-0.17 \pm 0.35$                        |
|                                 | ba   | $-0.04 \pm 0.03$                 | $0.16 \pm 0.22$                       | $0.13 \pm 0.18$                        | $0.13 \pm 0.22$                         | $0.17 \pm 0.23$                         |
|                                 | bad  | $-0.22 \pm 0.04$                 | $0.30 \pm 0.24$                       | $0.24 \pm 0.20$                        | $0.19 \pm 0.31$                         | $0.34 \pm 0.28$                         |
|                                 | badq | $-0.40 \pm 0.04$                 | $0.35 \pm 0.26$                       | $0.30 \pm 0.25$                        | $0.14 \pm 0.27$                         | $0.31 \pm 0.34$                         |
| $\text{C}_6\text{H}_{14}$       |      | $-0.43 \pm 0.03$                 | $-0.28 \pm 0.29$                      | $-0.22 \pm 0.23$                       | $-0.48 \pm 0.29$                        | $-0.36 \pm 0.37$                        |
|                                 | b    | $-0.56 \pm 0.04$                 | $-0.20 \pm 0.24$                      | $-0.21 \pm 0.19$                       | $-0.21 \pm 0.24$                        | $-0.42 \pm 0.27$                        |
|                                 | ba   | $-0.45 \pm 0.08$                 | $-0.02 \pm 0.25$                      | $-0.05 \pm 0.21$                       | $-0.44 \pm 0.23$                        | $0.29 \pm 0.27$                         |
|                                 | bad  | $-0.47 \pm 0.03$                 | $-0.41 \pm 0.29$                      | $-0.45 \pm 0.18$                       | $-0.34 \pm 0.22$                        | $-0.59 \pm 0.27$                        |
|                                 | badq | $-0.47 \pm 0.03$                 | $-0.52 \pm 0.32$                      | $-0.46 \pm 0.23$                       | $-0.68 \pm 0.30$                        | $-0.54 \pm 0.34$                        |
| $\text{CH}_3\text{OH}$          |      | $-2.16 \pm 0.03$                 | $0.01 \pm 0.30$                       | $0.02 \pm 0.26$                        | $-0.21 \pm 0.41$                        | $0.53 \pm 0.25$                         |
|                                 | b    | $-2.13 \pm 0.03$                 | $-0.02 \pm 0.39$                      | $-0.09 \pm 0.26$                       | $0.10 \pm 0.39$                         | $0.21 \pm 0.27$                         |
|                                 | ba   | $-2.13 \pm 0.03$                 | $0.49 \pm 0.46$                       | $0.41 \pm 0.34$                        | $0.32 \pm 0.36$                         | $-0.27 \pm 0.53$                        |
|                                 | bad  | $-1.99 \pm 0.04$                 | $0.27 \pm 0.28$                       | $0.16 \pm 0.26$                        | $-0.20 \pm 0.29$                        | $0.31 \pm 0.38$                         |
|                                 | badq | $-1.99 \pm 0.04$                 | $-0.39 \pm 0.30$                      | $-0.45 \pm 0.22$                       | $-0.46 \pm 0.27$                        | $-0.71 \pm 0.37$                        |
| $\text{C}_2\text{H}_6$          |      | $0.05 \pm 0.02$                  | $0.00 \pm 0.22$                       | $0.00 \pm 0.14$                        | $0.18 \pm 0.17$                         | $-0.32 \pm 0.24$                        |
|                                 | b    | $0.06 \pm 0.04$                  | $0.30 \pm 0.15$                       | $0.24 \pm 0.11$                        | $0.19 \pm 0.14$                         | $0.23 \pm 0.18$                         |
|                                 | ba   | $0.09 \pm 0.10$                  | $0.08 \pm 0.17$                       | $0.04 \pm 0.14$                        | $0.05 \pm 0.19$                         | $0.05 \pm 0.17$                         |
|                                 | bad  | $0.13 \pm 0.12$                  | $0.10 \pm 0.17$                       | $0.07 \pm 0.15$                        | $0.02 \pm 0.15$                         | $0.04 \pm 0.19$                         |
|                                 | badq | $0.07 \pm 0.08$                  | $0.04 \pm 0.14$                       | $0.02 \pm 0.11$                        | $-0.05 \pm 0.12$                        | $0.02 \pm 0.13$                         |
| $(\text{CH}_2)_4\text{O}$       |      | $-1.97 \pm 0.05$                 | $1.24 \pm 0.50$                       | $0.98 \pm 0.46$                        | $2.41 \pm 0.76$                         | $0.91 \pm 0.50$                         |
|                                 | b    | $-2.04 \pm 0.05$                 | $-0.37 \pm 0.57$                      | $-0.64 \pm 0.47$                       | $0.31 \pm 0.72$                         | $-0.78 \pm 0.51$                        |

*Continued on next page*

Table 11 – Continued from previous page

| Molec.                            | MM'  | $\Delta G_{\text{TI3}}^{N_i=11}$ | $\Delta \Delta G_{\text{TI}}^{N_i=3}$ | $\Delta \Delta G_{\text{BAR}}^{N_i=3}$ | $\Delta \Delta G_{\text{IEXP}}^{N_i=2}$ | $\Delta \Delta G_{\text{DEXP}}^{N_i=2}$ |
|-----------------------------------|------|----------------------------------|---------------------------------------|----------------------------------------|-----------------------------------------|-----------------------------------------|
|                                   | ba   | $-2.28 \pm 0.03$                 | $0.12 \pm 0.26$                       | $0.06 \pm 0.25$                        | $-0.16 \pm 0.38$                        | $0.66 \pm 0.25$                         |
|                                   | bad  | $-2.20 \pm 0.03$                 | $-0.54 \pm 0.29$                      | $-0.61 \pm 0.25$                       | $-0.60 \pm 0.39$                        | $-0.39 \pm 0.33$                        |
|                                   | badq | $-2.16 \pm 0.03$                 | $-0.03 \pm 0.29$                      | $-0.08 \pm 0.25$                       | $-0.19 \pm 0.34$                        | $0.13 \pm 0.27$                         |
| $\text{C}(\text{NH}_2)_3^+$       |      | $-0.97 \pm 0.06$                 | $0.25 \pm 0.69$                       | $0.25 \pm 0.59$                        | $-0.52 \pm 0.54$                        | $1.67 \pm 0.79$                         |
|                                   | b    | $-0.24 \pm 0.06$                 | $-1.28 \pm 0.70$                      | $-0.43 \pm 0.52$                       | $0.72 \pm 0.37$                         | $-4.26 \pm 0.86$                        |
|                                   | ba   | $-0.60 \pm 0.05$                 | $-0.01 \pm 0.49$                      | $-0.18 \pm 0.32$                       | $0.43 \pm 0.47$                         | $-0.49 \pm 0.42$                        |
|                                   | bad  | $-0.36 \pm 0.05$                 | $-0.55 \pm 0.31$                      | $-0.52 \pm 0.32$                       | $-0.62 \pm 0.44$                        | $-0.38 \pm 0.39$                        |
|                                   | badq | $-0.02 \pm 0.05$                 | $0.51 \pm 0.36$                       | $0.34 \pm 0.29$                        | $0.45 \pm 0.31$                         | $0.48 \pm 0.39$                         |
| $\text{C}_6\text{H}_5\text{NH}_2$ |      | $-3.04 \pm 0.04$                 | $-0.02 \pm 0.29$                      | $-0.09 \pm 0.35$                       | $-0.61 \pm 0.42$                        | $0.67 \pm 0.43$                         |
|                                   | b    | $-3.06 \pm 0.04$                 | $-0.58 \pm 0.40$                      | $-0.58 \pm 0.34$                       | $-0.18 \pm 0.57$                        | $-0.44 \pm 0.30$                        |
|                                   | ba   | $-3.09 \pm 0.05$                 | $0.08 \pm 0.42$                       | $-0.22 \pm 0.30$                       | $-0.10 \pm 0.38$                        | $0.14 \pm 0.27$                         |
|                                   | bad  | $-3.22 \pm 0.04$                 | $-0.92 \pm 0.30$                      | $-0.88 \pm 0.26$                       | $-1.42 \pm 0.33$                        | $-0.29 \pm 0.37$                        |
|                                   | badq | $-3.26 \pm 0.08$                 | $-0.25 \pm 0.46$                      | $-0.02 \pm 0.44$                       | $-0.51 \pm 0.45$                        | $1.03 \pm 0.38$                         |
| $\text{CH}_3\text{CONH}_2$        |      | $-3.59 \pm 0.05$                 | $1.24 \pm 0.32$                       | $1.22 \pm 0.33$                        | $0.32 \pm 0.27$                         | $1.60 \pm 0.50$                         |
|                                   | b    | $-3.41 \pm 0.04$                 | $-0.12 \pm 0.40$                      | $0.05 \pm 0.32$                        | $0.06 \pm 0.39$                         | $0.44 \pm 0.26$                         |
|                                   | ba   | $-3.52 \pm 0.05$                 | $0.24 \pm 0.32$                       | $0.09 \pm 0.22$                        | $0.17 \pm 0.26$                         | $-0.02 \pm 0.28$                        |
|                                   | bad  | $-3.50 \pm 0.04$                 | $0.08 \pm 0.22$                       | $0.02 \pm 0.19$                        | $-0.21 \pm 0.27$                        | $0.33 \pm 0.20$                         |
|                                   | badq | $-3.59 \pm 0.04$                 | $-0.27 \pm 0.30$                      | $-0.09 \pm 0.22$                       | $-0.15 \pm 0.22$                        | $-0.48 \pm 0.38$                        |
| $\text{H}_2\text{O}$              |      | $-3.62 \pm 0.03$                 | $0.31 \pm 0.31$                       | $0.32 \pm 0.21$                        | $0.37 \pm 0.31$                         | $0.61 \pm 0.19$                         |
|                                   | b    | $-3.72 \pm 0.03$                 | $0.52 \pm 0.28$                       | $0.41 \pm 0.21$                        | $0.56 \pm 0.36$                         | $0.58 \pm 0.24$                         |
|                                   | ba   | $-3.78 \pm 0.03$                 | $-0.32 \pm 0.21$                      | $-0.24 \pm 0.18$                       | $-0.10 \pm 0.29$                        | $-0.14 \pm 0.23$                        |
|                                   | bad  | $-3.79 \pm 0.03$                 | $-0.32 \pm 0.21$                      | $-0.24 \pm 0.18$                       | $-0.10 \pm 0.29$                        | $-0.14 \pm 0.23$                        |
|                                   | badq | $-3.72 \pm 0.03$                 | $-0.15 \pm 0.23$                      | $-0.07 \pm 0.18$                       | $0.03 \pm 0.29$                         | $0.05 \pm 0.22$                         |
| $\text{C}_2\text{H}_5\text{OH}$   |      | $-2.71 \pm 0.04$                 | $0.10 \pm 0.32$                       | $0.04 \pm 0.29$                        | $-0.13 \pm 0.31$                        | $0.30 \pm 0.34$                         |

Continued on next page

Table 11 – *Continued from previous page*

| Molec.                          | MM'  | $\Delta G_{\text{TI3}}^{N_i=11}$ | $\Delta\Delta G_{\text{TI}}^{N_i=3}$ | $\Delta\Delta G_{\text{BAR}}^{N_i=3}$ | $\Delta\Delta G_{\text{IEXP}}^{N_i=2}$ | $\Delta\Delta G_{\text{DEXP}}^{N_i=2}$ |
|---------------------------------|------|----------------------------------|--------------------------------------|---------------------------------------|----------------------------------------|----------------------------------------|
|                                 | b    | $-2.60 \pm 0.04$                 | $0.84 \pm 0.24$                      | $0.72 \pm 0.33$                       | $0.10 \pm 0.44$                        | $1.43 \pm 0.24$                        |
|                                 | ba   | $-2.72 \pm 0.05$                 | $-0.05 \pm 0.32$                     | $-0.10 \pm 0.30$                      | $-0.29 \pm 0.35$                       | $0.18 \pm 0.37$                        |
|                                 | bad  | $-2.79 \pm 0.05$                 | $0.20 \pm 0.45$                      | $0.07 \pm 0.30$                       | $0.58 \pm 0.46$                        | $-0.04 \pm 0.42$                       |
|                                 | badq | $-2.83 \pm 0.04$                 | $0.49 \pm 0.37$                      | $0.32 \pm 0.30$                       | $0.24 \pm 0.30$                        | $0.32 \pm 0.43$                        |
| $\text{C}_6\text{H}_6$          |      | $-0.94 \pm 0.02$                 | $-0.18 \pm 0.22$                     | $-0.17 \pm 0.17$                      | $-0.08 \pm 0.25$                       | $-0.19 \pm 0.20$                       |
|                                 | b    | $-0.86 \pm 0.02$                 | $0.14 \pm 0.17$                      | $0.11 \pm 0.13$                       | $0.07 \pm 0.19$                        | $0.29 \pm 0.14$                        |
|                                 | ba   | $-0.70 \pm 0.08$                 | $0.18 \pm 0.23$                      | $0.11 \pm 0.17$                       | $0.24 \pm 0.23$                        | $0.09 \pm 0.18$                        |
|                                 | bad  | $-0.59 \pm 0.16$                 | $-0.21 \pm 0.23$                     | $-0.22 \pm 0.20$                      | $-0.17 \pm 0.22$                       | $-0.35 \pm 0.25$                       |
|                                 | badq | $-0.67 \pm 0.02$                 | $0.11 \pm 0.16$                      | $0.08 \pm 0.12$                       | $0.04 \pm 0.17$                        | $0.11 \pm 0.17$                        |
| $\text{C}_6\text{H}_5\text{OH}$ |      | $-2.17 \pm 0.03$                 | $0.87 \pm 0.38$                      | $0.80 \pm 0.29$                       | $0.83 \pm 0.32$                        | $0.43 \pm 0.47$                        |
|                                 | b    | $-2.13 \pm 0.04$                 | $0.24 \pm 0.32$                      | $0.17 \pm 0.22$                       | $0.73 \pm 0.39$                        | $0.28 \pm 0.20$                        |
|                                 | ba   | $-2.26 \pm 0.03$                 | $0.48 \pm 0.28$                      | $0.37 \pm 0.20$                       | $0.98 \pm 0.48$                        | $-0.03 \pm 0.41$                       |
|                                 | bad  | $-2.22 \pm 0.03$                 | $0.47 \pm 0.20$                      | $0.48 \pm 0.19$                       | $0.65 \pm 0.42$                        | $0.80 \pm 0.24$                        |
|                                 | badq | $-2.36 \pm 0.06$                 | $-0.05 \pm 0.44$                     | $0.31 \pm 0.43$                       | $-0.03 \pm 0.47$                       | $1.99 \pm 0.34$                        |

Table 12: MM-to-QM net solvation free energy correction values from 6- $\lambda$  states simulated for 20 ps

| Molec.                     | MM'  | $\Delta G_{\text{TI3}}^{N_\lambda=11}$ | $\Delta\Delta G_{\text{TI}}^{N_\lambda=6}$ | $\Delta\Delta G_{\text{BAR}}^{N_\lambda=6}$ | $\Delta\Delta G_{\text{IEXP}}^{N_\lambda=5}$ | $\Delta\Delta G_{\text{DEXP}}^{N_\lambda=5}$ |
|----------------------------|------|----------------------------------------|--------------------------------------------|---------------------------------------------|----------------------------------------------|----------------------------------------------|
| $\text{CO}_3^{2-}$         |      | $-6.45 \pm 0.12$                       | $1.23 \pm 0.98$                            | $1.42 \pm 0.78$                             | $-0.36 \pm 0.91$                             | $1.71 \pm 0.77$                              |
|                            | b    | $-6.47 \pm 0.07$                       | $0.17 \pm 0.34$                            | $0.16 \pm 0.26$                             | $-0.30 \pm 0.32$                             | $0.43 \pm 0.35$                              |
|                            | ba   | $-6.13 \pm 0.06$                       | $-0.22 \pm 0.32$                           | $-0.18 \pm 0.25$                            | $-0.41 \pm 0.32$                             | $-0.27 \pm 0.37$                             |
|                            | bad  | $-6.09 \pm 0.06$                       | $-0.79 \pm 0.30$                           | $-0.74 \pm 0.23$                            | $-1.21 \pm 0.30$                             | $-0.36 \pm 0.33$                             |
|                            | badq | $-6.07 \pm 0.06$                       | $-0.08 \pm 0.28$                           | $-0.05 \pm 0.21$                            | $-0.44 \pm 0.29$                             | $0.31 \pm 0.31$                              |
| $\text{CH}_3\text{NH}_3^+$ |      | $1.79 \pm 0.04$                        | $0.02 \pm 0.26$                            | $0.00 \pm 0.19$                             | $0.01 \pm 0.28$                              | $0.01 \pm 0.25$                              |
|                            | b    | $1.89 \pm 0.03$                        | $0.17 \pm 0.17$                            | $0.14 \pm 0.12$                             | $0.24 \pm 0.18$                              | $0.04 \pm 0.17$                              |
|                            | ba   | $1.89 \pm 0.03$                        | $-0.08 \pm 0.12$                           | $-0.08 \pm 0.09$                            | $-0.04 \pm 0.14$                             | $-0.15 \pm 0.13$                             |
|                            | bad  | $1.79 \pm 0.04$                        | $0.07 \pm 0.12$                            | $0.09 \pm 0.09$                             | $0.07 \pm 0.12$                              | $0.09 \pm 0.11$                              |
|                            | badq | $1.80 \pm 0.03$                        | $-0.13 \pm 0.11$                           | $-0.13 \pm 0.08$                            | $-0.16 \pm 0.12$                             | $-0.09 \pm 0.10$                             |
| $\text{NH}_4^+$            |      | $5.64 \pm 0.04$                        | $0.18 \pm 0.23$                            | $0.13 \pm 0.15$                             | $0.22 \pm 0.29$                              | $0.26 \pm 0.18$                              |
|                            | b    | $5.69 \pm 0.02$                        | $-0.07 \pm 0.05$                           | $-0.07 \pm 0.03$                            | $-0.07 \pm 0.04$                             | $-0.07 \pm 0.05$                             |
|                            | ba   | $5.68 \pm 0.01$                        | $0.01 \pm 0.05$                            | $0.01 \pm 0.03$                             | $-0.01 \pm 0.05$                             | $0.01 \pm 0.05$                              |
|                            | bad  | $5.68 \pm 0.01$                        | $0.01 \pm 0.05$                            | $0.01 \pm 0.03$                             | $-0.01 \pm 0.05$                             | $0.01 \pm 0.05$                              |
|                            | badq | $5.70 \pm 0.02$                        | $-0.01 \pm 0.06$                           | $-0.01 \pm 0.03$                            | $0.00 \pm 0.05$                              | $-0.01 \pm 0.06$                             |
| $\text{CH}_3\text{CO}_2^-$ |      | $-9.33 \pm 0.08$                       | $0.88 \pm 0.50$                            | $0.75 \pm 0.39$                             | $0.60 \pm 0.49$                              | $1.54 \pm 0.52$                              |
|                            | b    | $-9.52 \pm 0.07$                       | $0.11 \pm 0.31$                            | $0.10 \pm 0.23$                             | $0.17 \pm 0.30$                              | $0.02 \pm 0.31$                              |
|                            | ba   | $-9.29 \pm 0.05$                       | $-0.36 \pm 0.28$                           | $-0.42 \pm 0.23$                            | $-0.57 \pm 0.31$                             | $-0.14 \pm 0.33$                             |
|                            | bad  | $-9.14 \pm 0.05$                       | $0.47 \pm 0.32$                            | $0.44 \pm 0.23$                             | $0.24 \pm 0.31$                              | $0.64 \pm 0.31$                              |
|                            | badq | $-9.27 \pm 0.07$                       | $-0.44 \pm 0.31$                           | $-0.43 \pm 0.25$                            | $-1.07 \pm 0.34$                             | $0.05 \pm 0.43$                              |
| $\text{H}_3\text{O}^+$     |      | $6.51 \pm 0.05$                        | $0.61 \pm 0.40$                            | $0.56 \pm 0.30$                             | $0.76 \pm 0.41$                              | $0.32 \pm 0.40$                              |
|                            | b    | $6.42 \pm 0.04$                        | $0.64 \pm 0.30$                            | $0.61 \pm 0.23$                             | $0.68 \pm 0.33$                              | $0.54 \pm 0.30$                              |
|                            | ba   | $6.35 \pm 0.02$                        | $-0.01 \pm 0.10$                           | $-0.01 \pm 0.07$                            | $0.03 \pm 0.10$                              | $-0.04 \pm 0.09$                             |

*Continued on next page*

Table 12 – Continued from previous page

| Molec.                          | MM'  | $\Delta G_{\text{TI3}}^{N_i=11}$ | $\Delta \Delta G_{\text{TI}}^{N_i=6}$ | $\Delta \Delta G_{\text{BAR}}^{N_i=6}$ | $\Delta \Delta G_{\text{IEXP}}^{N_i=5}$ | $\Delta \Delta G_{\text{DEXP}}^{N_i=5}$ |
|---------------------------------|------|----------------------------------|---------------------------------------|----------------------------------------|-----------------------------------------|-----------------------------------------|
|                                 | bad  | $6.35 \pm 0.02$                  | $-0.01 \pm 0.10$                      | $-0.01 \pm 0.07$                       | $0.03 \pm 0.10$                         | $-0.04 \pm 0.09$                        |
|                                 | badq | $6.41 \pm 0.02$                  | $-0.25 \pm 0.10$                      | $-0.26 \pm 0.07$                       | $-0.19 \pm 0.11$                        | $-0.34 \pm 0.10$                        |
| $\text{C}_6\text{H}_5\text{Cl}$ |      | $0.38 \pm 0.04$                  | $0.12 \pm 0.20$                       | $0.15 \pm 0.14$                        | $-0.05 \pm 0.23$                        | $0.44 \pm 0.20$                         |
|                                 | b    | $0.55 \pm 0.04$                  | $-0.19 \pm 0.18$                      | $-0.15 \pm 0.14$                       | $-0.19 \pm 0.18$                        | $-0.25 \pm 0.28$                        |
|                                 | ba   | $-0.04 \pm 0.03$                 | $0.02 \pm 0.16$                       | $0.01 \pm 0.11$                        | $0.06 \pm 0.15$                         | $-0.01 \pm 0.15$                        |
|                                 | bad  | $-0.22 \pm 0.04$                 | $0.12 \pm 0.18$                       | $0.11 \pm 0.13$                        | $0.05 \pm 0.18$                         | $0.10 \pm 0.21$                         |
|                                 | badq | $-0.40 \pm 0.04$                 | $0.16 \pm 0.16$                       | $0.15 \pm 0.12$                        | $0.08 \pm 0.17$                         | $0.19 \pm 0.19$                         |
| $\text{C}_6\text{H}_{14}$       |      | $-0.43 \pm 0.03$                 | $0.47 \pm 0.23$                       | $0.47 \pm 0.16$                        | $0.55 \pm 0.21$                         | $0.31 \pm 0.22$                         |
|                                 | b    | $-0.56 \pm 0.04$                 | $-0.22 \pm 0.20$                      | $-0.23 \pm 0.14$                       | $-0.05 \pm 0.22$                        | $-0.36 \pm 0.18$                        |
|                                 | ba   | $-0.45 \pm 0.08$                 | $0.18 \pm 0.19$                       | $0.16 \pm 0.15$                        | $0.10 \pm 0.19$                         | $0.19 \pm 0.19$                         |
|                                 | bad  | $-0.47 \pm 0.03$                 | $-0.14 \pm 0.18$                      | $-0.14 \pm 0.12$                       | $-0.14 \pm 0.15$                        | $-0.22 \pm 0.19$                        |
|                                 | badq | $-0.47 \pm 0.03$                 | $0.11 \pm 0.20$                       | $0.09 \pm 0.15$                        | $0.06 \pm 0.22$                         | $0.12 \pm 0.23$                         |
| $\text{CH}_3\text{OH}$          |      | $-2.16 \pm 0.03$                 | $0.18 \pm 0.23$                       | $0.17 \pm 0.16$                        | $0.17 \pm 0.26$                         | $0.23 \pm 0.21$                         |
|                                 | b    | $-2.13 \pm 0.03$                 | $-0.26 \pm 0.18$                      | $-0.26 \pm 0.13$                       | $-0.38 \pm 0.17$                        | $-0.14 \pm 0.18$                        |
|                                 | ba   | $-2.13 \pm 0.03$                 | $0.23 \pm 0.17$                       | $0.25 \pm 0.14$                        | $0.07 \pm 0.18$                         | $0.33 \pm 0.21$                         |
|                                 | bad  | $-1.99 \pm 0.04$                 | $-0.04 \pm 0.21$                      | $-0.07 \pm 0.16$                       | $-0.01 \pm 0.23$                        | $-0.06 \pm 0.19$                        |
|                                 | badq | $-1.99 \pm 0.04$                 | $-0.19 \pm 0.21$                      | $-0.25 \pm 0.14$                       | $-0.19 \pm 0.18$                        | $-0.36 \pm 0.20$                        |
| $\text{C}_2\text{H}_6$          |      | $0.05 \pm 0.02$                  | $-0.21 \pm 0.10$                      | $-0.20 \pm 0.07$                       | $-0.14 \pm 0.10$                        | $-0.27 \pm 0.10$                        |
|                                 | b    | $0.06 \pm 0.04$                  | $0.09 \pm 0.09$                       | $0.09 \pm 0.08$                        | $0.06 \pm 0.09$                         | $0.08 \pm 0.11$                         |
|                                 | ba   | $0.09 \pm 0.10$                  | $-0.04 \pm 0.12$                      | $-0.03 \pm 0.12$                       | $-0.06 \pm 0.12$                        | $-0.02 \pm 0.13$                        |
|                                 | bad  | $0.13 \pm 0.12$                  | $-0.15 \pm 0.15$                      | $-0.15 \pm 0.13$                       | $-0.14 \pm 0.14$                        | $-0.16 \pm 0.15$                        |
|                                 | badq | $0.07 \pm 0.08$                  | $-0.03 \pm 0.11$                      | $-0.04 \pm 0.10$                       | $-0.05 \pm 0.11$                        | $-0.04 \pm 0.11$                        |
| $(\text{CH}_2)_4\text{O}$       |      | $-1.97 \pm 0.05$                 | $-0.07 \pm 0.29$                      | $-0.09 \pm 0.25$                       | $0.03 \pm 0.37$                         | $-0.16 \pm 0.36$                        |
|                                 | b    | $-2.04 \pm 0.05$                 | $-0.41 \pm 0.32$                      | $-0.51 \pm 0.26$                       | $-0.18 \pm 0.38$                        | $-0.66 \pm 0.32$                        |

Continued on next page



Table 12 – Continued from previous page

| Molec.                            | MM'  | $\Delta G_{\text{TI3}}^{N_i=11}$ | $\Delta \Delta G_{\text{TI}}^{N_i=6}$ | $\Delta \Delta G_{\text{BAR}}^{N_i=6}$ | $\Delta \Delta G_{\text{IEXP}}^{N_i=5}$ | $\Delta \Delta G_{\text{DEXP}}^{N_i=5}$ |
|-----------------------------------|------|----------------------------------|---------------------------------------|----------------------------------------|-----------------------------------------|-----------------------------------------|
|                                   | ba   | $-2.28 \pm 0.03$                 | $0.03 \pm 0.16$                       | $0.00 \pm 0.12$                        | $-0.16 \pm 0.18$                        | $0.23 \pm 0.16$                         |
|                                   | bad  | $-2.20 \pm 0.03$                 | $-0.78 \pm 0.22$                      | $-0.79 \pm 0.16$                       | $-0.70 \pm 0.25$                        | $-0.82 \pm 0.23$                        |
|                                   | badq | $-2.16 \pm 0.03$                 | $0.20 \pm 0.20$                       | $0.21 \pm 0.15$                        | $0.17 \pm 0.19$                         | $0.20 \pm 0.20$                         |
| $\text{C}(\text{NH}_2)_3^+$       |      | $-0.97 \pm 0.06$                 | $0.03 \pm 0.42$                       | $-0.01 \pm 0.31$                       | $-0.08 \pm 0.49$                        | $0.21 \pm 0.50$                         |
|                                   | b    | $-0.24 \pm 0.06$                 | $-0.33 \pm 0.36$                      | $-0.27 \pm 0.32$                       | $0.45 \pm 0.33$                         | $-1.11 \pm 0.47$                        |
|                                   | ba   | $-0.60 \pm 0.05$                 | $-0.05 \pm 0.24$                      | $-0.05 \pm 0.19$                       | $-0.13 \pm 0.26$                        | $-0.10 \pm 0.24$                        |
|                                   | bad  | $-0.36 \pm 0.05$                 | $-0.14 \pm 0.24$                      | $-0.08 \pm 0.17$                       | $-0.06 \pm 0.20$                        | $-0.24 \pm 0.28$                        |
|                                   | badq | $-0.02 \pm 0.05$                 | $-0.24 \pm 0.26$                      | $-0.26 \pm 0.18$                       | $-0.19 \pm 0.29$                        | $-0.19 \pm 0.24$                        |
| $\text{C}_6\text{H}_5\text{NH}_2$ |      | $-3.04 \pm 0.04$                 | $0.04 \pm 0.28$                       | $0.00 \pm 0.22$                        | $0.00 \pm 0.28$                         | $-0.02 \pm 0.31$                        |
|                                   | b    | $-3.06 \pm 0.04$                 | $-0.03 \pm 0.28$                      | $-0.07 \pm 0.20$                       | $0.06 \pm 0.32$                         | $-0.12 \pm 0.30$                        |
|                                   | ba   | $-3.09 \pm 0.05$                 | $0.13 \pm 0.21$                       | $0.07 \pm 0.14$                        | $-0.04 \pm 0.21$                        | $0.27 \pm 0.18$                         |
|                                   | bad  | $-3.22 \pm 0.04$                 | $-0.14 \pm 0.24$                      | $-0.20 \pm 0.18$                       | $-0.21 \pm 0.32$                        | $-0.04 \pm 0.23$                        |
|                                   | badq | $-3.26 \pm 0.08$                 | $0.21 \pm 0.37$                       | $0.24 \pm 0.30$                        | $0.31 \pm 0.41$                         | $0.36 \pm 0.35$                         |
| $\text{CH}_3\text{CONH}_2$        |      | $-3.59 \pm 0.05$                 | $0.34 \pm 0.25$                       | $0.40 \pm 0.22$                        | $0.27 \pm 0.29$                         | $0.56 \pm 0.29$                         |
|                                   | b    | $-3.41 \pm 0.04$                 | $0.42 \pm 0.22$                       | $0.43 \pm 0.18$                        | $0.34 \pm 0.24$                         | $0.50 \pm 0.24$                         |
|                                   | ba   | $-3.52 \pm 0.05$                 | $-0.09 \pm 0.25$                      | $-0.11 \pm 0.17$                       | $0.13 \pm 0.25$                         | $-0.32 \pm 0.22$                        |
|                                   | bad  | $-3.50 \pm 0.04$                 | $0.26 \pm 0.21$                       | $0.27 \pm 0.13$                        | $0.33 \pm 0.17$                         | $0.24 \pm 0.19$                         |
|                                   | badq | $-3.59 \pm 0.04$                 | $0.15 \pm 0.20$                       | $0.21 \pm 0.13$                        | $0.20 \pm 0.16$                         | $0.04 \pm 0.18$                         |
| $\text{H}_2\text{O}$              |      | $-3.62 \pm 0.03$                 | $0.13 \pm 0.21$                       | $0.15 \pm 0.14$                        | $0.18 \pm 0.18$                         | $0.10 \pm 0.22$                         |
|                                   | b    | $-3.72 \pm 0.03$                 | $-0.34 \pm 0.21$                      | $-0.30 \pm 0.14$                       | $-0.17 \pm 0.26$                        | $-0.38 \pm 0.20$                        |
|                                   | ba   | $-3.78 \pm 0.03$                 | $0.66 \pm 0.17$                       | $0.64 \pm 0.11$                        | $0.69 \pm 0.18$                         | $0.60 \pm 0.15$                         |
|                                   | bad  | $-3.79 \pm 0.03$                 | $0.66 \pm 0.17$                       | $0.64 \pm 0.11$                        | $0.69 \pm 0.18$                         | $0.60 \pm 0.15$                         |
|                                   | badq | $-3.72 \pm 0.03$                 | $0.30 \pm 0.21$                       | $0.33 \pm 0.16$                        | $0.52 \pm 0.22$                         | $0.18 \pm 0.26$                         |
| $\text{C}_2\text{H}_5\text{OH}$   |      | $-2.71 \pm 0.04$                 | $0.13 \pm 0.24$                       | $0.12 \pm 0.18$                        | $0.14 \pm 0.29$                         | $0.12 \pm 0.24$                         |

Continued on next page

Table 12 – Continued from previous page

| Molec.                          | MM'  | $\Delta G_{\text{TI3}}^{N_i=11}$ | $\Delta\Delta G_{\text{TI}}^{N_i=6}$ | $\Delta\Delta G_{\text{BAR}}^{N_i=6}$ | $\Delta\Delta G_{\text{IEXP}}^{N_i=5}$ | $\Delta\Delta G_{\text{DEXP}}^{N_i=5}$ |
|---------------------------------|------|----------------------------------|--------------------------------------|---------------------------------------|----------------------------------------|----------------------------------------|
|                                 | b    | $-2.60 \pm 0.04$                 | $-0.03 \pm 0.21$                     | $-0.01 \pm 0.16$                      | $-0.17 \pm 0.25$                       | $0.13 \pm 0.22$                        |
|                                 | ba   | $-2.72 \pm 0.05$                 | $-0.53 \pm 0.23$                     | $-0.50 \pm 0.19$                      | $-0.53 \pm 0.27$                       | $-0.49 \pm 0.26$                       |
|                                 | bad  | $-2.79 \pm 0.05$                 | $-0.29 \pm 0.23$                     | $-0.29 \pm 0.16$                      | $-0.30 \pm 0.22$                       | $-0.26 \pm 0.24$                       |
|                                 | badq | $-2.83 \pm 0.04$                 | $-0.03 \pm 0.22$                     | $-0.05 \pm 0.16$                      | $-0.07 \pm 0.19$                       | $-0.13 \pm 0.24$                       |
| $\text{C}_6\text{H}_6$          |      | $-0.94 \pm 0.02$                 | $0.28 \pm 0.15$                      | $0.28 \pm 0.10$                       | $0.31 \pm 0.14$                        | $0.24 \pm 0.15$                        |
|                                 | b    | $-0.86 \pm 0.02$                 | $0.31 \pm 0.11$                      | $0.29 \pm 0.08$                       | $0.26 \pm 0.10$                        | $0.34 \pm 0.10$                        |
|                                 | ba   | $-0.70 \pm 0.08$                 | $0.11 \pm 0.15$                      | $0.10 \pm 0.13$                       | $0.17 \pm 0.17$                        | $0.07 \pm 0.16$                        |
|                                 | bad  | $-0.59 \pm 0.16$                 | $-0.09 \pm 0.20$                     | $-0.10 \pm 0.18$                      | $-0.05 \pm 0.22$                       | $-0.14 \pm 0.20$                       |
|                                 | badq | $-0.67 \pm 0.02$                 | $0.08 \pm 0.10$                      | $0.06 \pm 0.08$                       | $0.06 \pm 0.13$                        | $0.08 \pm 0.12$                        |
| $\text{C}_6\text{H}_5\text{OH}$ |      | $-2.17 \pm 0.03$                 | $0.33 \pm 0.20$                      | $0.34 \pm 0.15$                       | $0.38 \pm 0.22$                        | $0.36 \pm 0.18$                        |
|                                 | b    | $-2.13 \pm 0.04$                 | $-0.10 \pm 0.16$                     | $-0.09 \pm 0.11$                      | $-0.04 \pm 0.17$                       | $-0.09 \pm 0.16$                       |
|                                 | ba   | $-2.26 \pm 0.03$                 | $0.20 \pm 0.20$                      | $0.18 \pm 0.14$                       | $0.35 \pm 0.22$                        | $0.04 \pm 0.20$                        |
|                                 | bad  | $-2.22 \pm 0.03$                 | $0.02 \pm 0.20$                      | $0.02 \pm 0.14$                       | $0.12 \pm 0.22$                        | $0.01 \pm 0.22$                        |
|                                 | badq | $-2.36 \pm 0.06$                 | $0.83 \pm 0.36$                      | $0.86 \pm 0.26$                       | $0.99 \pm 0.36$                        | $1.13 \pm 0.31$                        |

Table 13: MM-to-QM aqueous-phase solvation free energy correction values from 2- $\lambda$  states simulated for 200 ps

| Molec.                                       | MM'  | $\Delta G_{\text{TI3}}^{N_\lambda=11}$ | $\Delta\Delta G_{\text{TI}}^{N_\lambda=2}$ | $\Delta\Delta G_{\text{BAR}}^{N_\lambda=2}$ | $\Delta\Delta G_{\text{IEXP}}^{N_\lambda=1}$ | $\Delta\Delta G_{\text{DEXP}}^{N_\lambda=1}$ |
|----------------------------------------------|------|----------------------------------------|--------------------------------------------|---------------------------------------------|----------------------------------------------|----------------------------------------------|
| CO <sub>3</sub> <sup>2-</sup>                |      | -165240.53 ± 0.11                      | 5.25 ± 0.37                                | 1.15 ± 0.71                                 | -9.87 ± 0.40                                 | 12.16 ± 0.60                                 |
|                                              | b    | -165222.41 ± 0.06                      | 1.50 ± 0.16                                | 0.98 ± 0.35                                 | -0.87 ± 0.26                                 | 3.41 ± 0.28                                  |
|                                              | ba   | -165287.40 ± 0.05                      | 0.73 ± 0.14                                | 0.29 ± 0.29                                 | -0.69 ± 0.40                                 | 1.85 ± 0.31                                  |
|                                              | bad  | -165339.45 ± 0.05                      | 0.95 ± 0.15                                | 0.16 ± 0.33                                 | -0.65 ± 0.53                                 | 1.74 ± 0.37                                  |
|                                              | badq | -165328.69 ± 0.05                      | 0.56 ± 0.13                                | 0.04 ± 0.28                                 | -0.37 ± 0.44                                 | 0.22 ± 0.34                                  |
| CH <sub>3</sub> NH <sub>3</sub> <sup>+</sup> |      | -60348.42 ± 0.04                       | 0.32 ± 0.10                                | 0.05 ± 0.13                                 | -0.59 ± 0.15                                 | 0.20 ± 0.24                                  |
|                                              | b    | -60352.99 ± 0.02                       | 0.07 ± 0.04                                | 0.03 ± 0.05                                 | -0.20 ± 0.08                                 | 0.11 ± 0.09                                  |
|                                              | ba   | -60355.28 ± 0.01                       | 0.06 ± 0.03                                | 0.04 ± 0.04                                 | 0.03 ± 0.06                                  | -0.03 ± 0.08                                 |
|                                              | bad  | -60355.56 ± 0.02                       | 0.03 ± 0.04                                | 0.02 ± 0.04                                 | 0.02 ± 0.06                                  | -0.05 ± 0.08                                 |
|                                              | badq | -60351.61 ± 0.01                       | 0.02 ± 0.03                                | 0.01 ± 0.04                                 | 0.03 ± 0.06                                  | -0.11 ± 0.12                                 |
| NH <sub>4</sub> <sup>+</sup>                 |      | -35650.57 ± 0.04                       | 0.30 ± 0.10                                | 0.00 ± 0.11                                 | -0.38 ± 0.16                                 | 0.24 ± 0.27                                  |
|                                              | b    | -35656.79 ± 0.01                       | 0.00 ± 0.01                                | 0.00 ± 0.01                                 | -0.04 ± 0.02                                 | 0.03 ± 0.02                                  |
|                                              | ba   | -35657.95 ± 0.01                       | -0.01 ± 0.01                               | -0.01 ± 0.01                                | -0.04 ± 0.02                                 | 0.02 ± 0.02                                  |
|                                              | bad  | -35657.95 ± 0.01                       | -0.01 ± 0.01                               | -0.01 ± 0.01                                | -0.04 ± 0.02                                 | 0.02 ± 0.02                                  |
|                                              | badq | -35657.18 ± 0.01                       | -0.02 ± 0.02                               | -0.03 ± 0.02                                | -0.05 ± 0.02                                 | 0.00 ± 0.02                                  |
| CH <sub>3</sub> CO <sub>2</sub> <sup>-</sup> |      | -143235.31 ± 0.07                      | 0.11 ± 0.22                                | -0.03 ± 0.56                                | -1.16 ± 0.53                                 | 1.52 ± 0.52                                  |
|                                              | b    | -143222.40 ± 0.05                      | 0.59 ± 0.14                                | -0.15 ± 0.20                                | -1.24 ± 0.28                                 | 0.58 ± 0.24                                  |
|                                              | ba   | -143272.32 ± 0.04                      | 0.35 ± 0.11                                | 0.12 ± 0.18                                 | -0.90 ± 0.32                                 | 0.84 ± 0.29                                  |
|                                              | bad  | -143277.15 ± 0.04                      | 0.03 ± 0.11                                | -0.17 ± 0.20                                | -1.09 ± 0.40                                 | 0.71 ± 0.33                                  |
|                                              | badq | -143305.89 ± 0.06                      | 0.06 ± 0.14                                | 0.18 ± 0.41                                 | -1.74 ± 0.45                                 | 2.03 ± 0.44                                  |
| H <sub>3</sub> O <sup>+</sup>                |      | -48062.72 ± 0.05                       | 0.46 ± 0.14                                | 0.12 ± 0.24                                 | 0.65 ± 0.57                                  | 0.49 ± 0.35                                  |
|                                              | b    | -48067.54 ± 0.04                       | 0.17 ± 0.11                                | 0.21 ± 0.15                                 | 0.57 ± 0.35                                  | 0.56 ± 0.28                                  |
|                                              | ba   | -48070.58 ± 0.01                       | 0.02 ± 0.03                                | 0.02 ± 0.03                                 | 0.08 ± 0.05                                  | -0.02 ± 0.05                                 |

*Continued on next page*

Table 13 – *Continued from previous page*

| Molec.                          | MM'  | $\Delta G_{\text{TI3}}^{N_i=11}$ | $\Delta\Delta G_{\text{TI}}^{N_i=2}$ | $\Delta\Delta G_{\text{BAR}}^{N_i=2}$ | $\Delta\Delta G_{\text{IEXP}}^{N_i=1}$ | $\Delta\Delta G_{\text{DEXP}}^{N_i=1}$ |
|---------------------------------|------|----------------------------------|--------------------------------------|---------------------------------------|----------------------------------------|----------------------------------------|
|                                 | bad  | $-48070.58 \pm 0.01$             | $0.02 \pm 0.03$                      | $0.02 \pm 0.03$                       | $0.08 \pm 0.05$                        | $-0.02 \pm 0.05$                       |
|                                 | badq | $-48070.60 \pm 0.01$             | $0.07 \pm 0.03$                      | $0.07 \pm 0.03$                       | $0.07 \pm 0.05$                        | $0.08 \pm 0.06$                        |
| $\text{C}_6\text{H}_5\text{Cl}$ |      | $-433851.87 \pm 0.03$            | $0.07 \pm 0.08$                      | $0.18 \pm 0.09$                       | $-0.09 \pm 0.14$                       | $0.16 \pm 0.19$                        |
|                                 | b    | $-433850.81 \pm 0.04$            | $0.15 \pm 0.10$                      | $0.21 \pm 0.11$                       | $-0.02 \pm 0.14$                       | $0.51 \pm 0.17$                        |
|                                 | ba   | $-433854.43 \pm 0.03$            | $0.05 \pm 0.09$                      | $0.05 \pm 0.11$                       | $-0.10 \pm 0.12$                       | $-0.39 \pm 0.34$                       |
|                                 | bad  | $-433856.05 \pm 0.03$            | $0.09 \pm 0.09$                      | $0.11 \pm 0.09$                       | $-0.11 \pm 0.13$                       | $0.20 \pm 0.22$                        |
|                                 | badq | $-433860.24 \pm 0.04$            | $0.07 \pm 0.09$                      | $0.11 \pm 0.10$                       | $0.31 \pm 0.35$                        | $0.01 \pm 0.15$                        |
| $\text{C}_6\text{H}_{14}$       |      | $-148579.99 \pm 0.03$            | $-0.13 \pm 0.08$                     | $-0.07 \pm 0.09$                      | $-0.10 \pm 0.16$                       | $-0.13 \pm 0.17$                       |
|                                 | b    | $-148580.59 \pm 0.03$            | $-0.01 \pm 0.08$                     | $-0.04 \pm 0.09$                      | $-0.33 \pm 0.10$                       | $0.19 \pm 0.14$                        |
|                                 | ba   | $-148579.49 \pm 0.03$            | $-0.07 \pm 0.08$                     | $-0.07 \pm 0.09$                      | $-0.13 \pm 0.16$                       | $0.06 \pm 0.13$                        |
|                                 | bad  | $-148579.45 \pm 0.03$            | $-0.20 \pm 0.07$                     | $-0.15 \pm 0.08$                      | $-0.08 \pm 0.20$                       | $-0.10 \pm 0.12$                       |
|                                 | badq | $-148576.82 \pm 0.03$            | $-0.14 \pm 0.08$                     | $-0.11 \pm 0.09$                      | $0.02 \pm 0.21$                        | $-0.05 \pm 0.12$                       |
| $\text{CH}_3\text{OH}$          |      | $-72530.37 \pm 0.03$             | $0.01 \pm 0.09$                      | $0.06 \pm 0.12$                       | $-0.36 \pm 0.25$                       | $-0.03 \pm 0.28$                       |
|                                 | b    | $-72530.81 \pm 0.03$             | $-0.12 \pm 0.09$                     | $-0.12 \pm 0.13$                      | $-0.39 \pm 0.25$                       | $-0.11 \pm 0.26$                       |
|                                 | ba   | $-72530.76 \pm 0.03$             | $0.02 \pm 0.08$                      | $0.07 \pm 0.14$                       | $-0.45 \pm 0.22$                       | $-0.18 \pm 0.46$                       |
|                                 | bad  | $-72530.78 \pm 0.03$             | $-0.12 \pm 0.08$                     | $-0.10 \pm 0.12$                      | $-0.43 \pm 0.24$                       | $0.29 \pm 0.16$                        |
|                                 | badq | $-72530.61 \pm 0.03$             | $-0.07 \pm 0.09$                     | $-0.15 \pm 0.13$                      | $-0.13 \pm 0.37$                       | $-0.33 \pm 0.28$                       |
| $\text{C}_2\text{H}_6$          |      | $-50024.16 \pm 0.02$             | $-0.03 \pm 0.08$                     | $-0.01 \pm 0.06$                      | $-0.03 \pm 0.12$                       | $0.01 \pm 0.06$                        |
|                                 | b    | $-50024.32 \pm 0.01$             | $0.00 \pm 0.04$                      | $-0.03 \pm 0.04$                      | $-0.04 \pm 0.08$                       | $0.06 \pm 0.06$                        |
|                                 | ba   | $-50024.08 \pm 0.01$             | $-0.02 \pm 0.03$                     | $-0.02 \pm 0.03$                      | $-0.03 \pm 0.06$                       | $0.05 \pm 0.03$                        |
|                                 | bad  | $-50024.17 \pm 0.01$             | $0.04 \pm 0.03$                      | $0.03 \pm 0.03$                       | $-0.03 \pm 0.06$                       | $0.09 \pm 0.04$                        |
|                                 | badq | $-50024.33 \pm 0.01$             | $-0.01 \pm 0.03$                     | $-0.02 \pm 0.03$                      | $-0.03 \pm 0.06$                       | $-0.04 \pm 0.06$                       |
| $(\text{CH}_2)_4\text{O}$       |      | $-145701.53 \pm 0.05$            | $0.18 \pm 0.12$                      | $0.08 \pm 0.17$                       | $-0.34 \pm 0.31$                       | $-0.42 \pm 0.56$                       |
|                                 | b    | $-145701.13 \pm 0.05$            | $0.64 \pm 0.14$                      | $0.25 \pm 0.21$                       | $-1.02 \pm 0.20$                       | $0.87 \pm 0.31$                        |

*Continued on next page*

Table 13 – *Continued from previous page*

| Molec.                                        | MM'  | $\Delta G_{\text{TI3}}^{N_i=11}$ | $\Delta\Delta G_{\text{TI}}^{N_i=2}$ | $\Delta\Delta G_{\text{BAR}}^{N_i=2}$ | $\Delta\Delta G_{\text{IEXP}}^{N_i=1}$ | $\Delta\Delta G_{\text{DEXP}}^{N_i=1}$ |
|-----------------------------------------------|------|----------------------------------|--------------------------------------|---------------------------------------|----------------------------------------|----------------------------------------|
| C(NH <sub>2</sub> ) <sub>3</sub> <sup>+</sup> | ba   | -145699.24 ± 0.03                | 0.07 ± 0.09                          | 0.13 ± 0.12                           | -0.04 ± 0.16                           | 0.63 ± 0.15                            |
|                                               | bad  | -145700.24 ± 0.03                | -0.10 ± 0.09                         | -0.20 ± 0.12                          | -0.08 ± 0.17                           | -0.37 ± 0.25                           |
|                                               | badq | -145684.45 ± 0.03                | 0.17 ± 0.09                          | 0.11 ± 0.10                           | 0.13 ± 0.13                            | -0.28 ± 0.16                           |
|                                               | b    | -128902.19 ± 0.05                | 1.46 ± 0.20                          | 0.13 ± 0.23                           | -1.23 ± 0.24                           | 1.73 ± 0.21                            |
|                                               | b    | -128907.35 ± 0.05                | 1.13 ± 0.18                          | -0.10 ± 0.15                          | -1.04 ± 0.22                           | 0.46 ± 0.32                            |
|                                               | ba   | -128933.28 ± 0.04                | 0.61 ± 0.15                          | -0.20 ± 0.11                          | -0.68 ± 0.24                           | 0.01 ± 0.20                            |
| C <sub>6</sub> H <sub>5</sub> NH <sub>2</sub> | bad  | -128936.23 ± 0.04                | 0.63 ± 0.14                          | -0.10 ± 0.10                          | -0.55 ± 0.24                           | 0.06 ± 0.17                            |
|                                               | badq | -128918.95 ± 0.04                | 0.18 ± 0.12                          | -0.14 ± 0.13                          | -0.64 ± 0.30                           | -0.57 ± 0.44                           |
|                                               | b    | -180230.53 ± 0.04                | 0.02 ± 0.11                          | 0.01 ± 0.20                           | -0.39 ± 0.25                           | 0.09 ± 0.29                            |
|                                               | b    | -180230.55 ± 0.04                | 0.19 ± 0.10                          | 0.12 ± 0.19                           | -0.08 ± 0.53                           | 0.80 ± 0.24                            |
|                                               | ba   | -180233.99 ± 0.04                | 0.13 ± 0.10                          | -0.08 ± 0.14                          | -0.63 ± 0.18                           | -0.27 ± 0.35                           |
|                                               | bad  | -180233.04 ± 0.04                | 0.13 ± 0.09                          | 0.00 ± 0.13                           | -0.50 ± 0.22                           | 0.46 ± 0.14                            |
| CH <sub>3</sub> CONH <sub>2</sub>             | badq | -180262.07 ± 0.07                | 0.00 ± 0.17                          | -0.11 ± 0.53                          | -1.87 ± 0.48                           | 2.25 ± 0.44                            |
|                                               | b    | -131079.14 ± 0.05                | -0.35 ± 0.13                         | 0.01 ± 0.20                           | 1.70 ± 0.22                            | 0.39 ± 0.30                            |
|                                               | b    | -131078.83 ± 0.04                | -0.28 ± 0.12                         | 0.11 ± 0.19                           | -0.09 ± 0.49                           | 1.01 ± 0.18                            |
|                                               | ba   | -131083.77 ± 0.04                | -0.32 ± 0.11                         | -0.04 ± 0.16                          | -0.15 ± 0.16                           | 0.21 ± 0.29                            |
|                                               | bad  | -131084.84 ± 0.04                | -0.21 ± 0.11                         | 0.08 ± 0.17                           | -0.11 ± 0.40                           | 0.45 ± 0.27                            |
|                                               | badq | -131071.30 ± 0.03                | -0.04 ± 0.09                         | 0.02 ± 0.10                           | -0.36 ± 0.20                           | 0.49 ± 0.14                            |
| H <sub>2</sub> O                              | b    | -47896.99 ± 0.03                 | -0.05 ± 0.08                         | -0.08 ± 0.14                          | -0.73 ± 0.14                           | 0.35 ± 0.21                            |
|                                               | b    | -47897.87 ± 0.03                 | 0.04 ± 0.08                          | -0.04 ± 0.16                          | -0.57 ± 0.24                           | -0.02 ± 0.23                           |
|                                               | ba   | -47898.10 ± 0.03                 | 0.19 ± 0.08                          | 0.13 ± 0.16                           | -0.61 ± 0.20                           | 0.70 ± 0.24                            |
|                                               | bad  | -47898.10 ± 0.03                 | 0.19 ± 0.08                          | 0.13 ± 0.16                           | -0.61 ± 0.20                           | 0.70 ± 0.24                            |
|                                               | badq | -47897.84 ± 0.03                 | 0.00 ± 0.08                          | -0.01 ± 0.14                          | -0.63 ± 0.21                           | 0.19 ± 0.23                            |
| C <sub>2</sub> H <sub>5</sub> OH              |      | -97165.69 ± 0.04                 | 0.21 ± 0.10                          | 0.23 ± 0.16                           | -0.09 ± 0.17                           | 0.38 ± 0.23                            |

*Continued on next page*

Table 13 – *Continued from previous page*

| Molec.                          | MM'  | $\Delta G_{\text{TI3}}^{N_{\lambda}=11}$ | $\Delta\Delta G_{\text{TI}}^{N_{\lambda}=2}$ | $\Delta\Delta G_{\text{BAR}}^{N_{\lambda}=2}$ | $\Delta\Delta G_{\text{IEXP}}^{N_{\lambda}=1}$ | $\Delta\Delta G_{\text{DEXP}}^{N_{\lambda}=1}$ |
|---------------------------------|------|------------------------------------------|----------------------------------------------|-----------------------------------------------|------------------------------------------------|------------------------------------------------|
|                                 | b    | $-97165.97 \pm 0.04$                     | $0.11 \pm 0.09$                              | $0.11 \pm 0.16$                               | $-0.39 \pm 0.19$                               | $0.68 \pm 0.20$                                |
|                                 | ba   | $-97166.30 \pm 0.04$                     | $0.01 \pm 0.09$                              | $0.03 \pm 0.15$                               | $-0.26 \pm 0.21$                               | $-0.35 \pm 0.16$                               |
|                                 | bad  | $-97166.59 \pm 0.04$                     | $0.11 \pm 0.10$                              | $-0.01 \pm 0.13$                              | $-0.24 \pm 0.20$                               | $0.25 \pm 0.20$                                |
|                                 | badq | $-97165.26 \pm 0.03$                     | $0.13 \pm 0.09$                              | $0.01 \pm 0.12$                               | $-0.35 \pm 0.23$                               | $-0.48 \pm 0.15$                               |
| $\text{C}_6\text{H}_6$          |      | $-145560.94 \pm 0.02$                    | $0.12 \pm 0.05$                              | $0.05 \pm 0.07$                               | $-0.09 \pm 0.15$                               | $0.18 \pm 0.13$                                |
|                                 | b    | $-145561.20 \pm 0.02$                    | $-0.09 \pm 0.05$                             | $-0.14 \pm 0.06$                              | $-0.13 \pm 0.14$                               | $-0.29 \pm 0.13$                               |
|                                 | ba   | $-145564.93 \pm 0.02$                    | $0.00 \pm 0.05$                              | $-0.05 \pm 0.06$                              | $-0.04 \pm 0.21$                               | $0.04 \pm 0.10$                                |
|                                 | bad  | $-145563.51 \pm 0.02$                    | $-0.02 \pm 0.05$                             | $-0.09 \pm 0.06$                              | $-0.08 \pm 0.20$                               | $-0.03 \pm 0.09$                               |
|                                 | badq | $-145563.88 \pm 0.02$                    | $-0.08 \pm 0.04$                             | $-0.05 \pm 0.06$                              | $0.00 \pm 0.20$                                | $0.06 \pm 0.11$                                |
| $\text{C}_6\text{H}_5\text{OH}$ |      | $-192696.13 \pm 0.03$                    | $0.01 \pm 0.09$                              | $0.00 \pm 0.13$                               | $0.03 \pm 0.32$                                | $0.46 \pm 0.20$                                |
|                                 | b    | $-192696.41 \pm 0.04$                    | $-0.03 \pm 0.09$                             | $-0.05 \pm 0.14$                              | $-0.07 \pm 0.28$                               | $0.21 \pm 0.23$                                |
|                                 | ba   | $-192700.83 \pm 0.03$                    | $0.12 \pm 0.09$                              | $0.11 \pm 0.13$                               | $0.02 \pm 0.23$                                | $0.31 \pm 0.24$                                |
|                                 | bad  | $-192699.26 \pm 0.03$                    | $0.13 \pm 0.09$                              | $0.16 \pm 0.13$                               | $-0.04 \pm 0.24$                               | $0.52 \pm 0.20$                                |
|                                 | badq | $-192711.46 \pm 0.06$                    | $-0.76 \pm 0.16$                             | $-0.08 \pm 0.44$                              | $-1.01 \pm 0.35$                               | $1.49 \pm 0.36$                                |

Table 14: MM-to-QM aqueous-phase solvation free energy correction values from 3- $\lambda$  states simulated for 200 ps

| Molec.                                       | MM'  | $\Delta G_{\text{TI3}}^{N_\lambda=11}$ | $\Delta\Delta G_{\text{TI}}^{N_\lambda=3}$ | $\Delta\Delta G_{\text{BAR}}^{N_\lambda=3}$ | $\Delta\Delta G_{\text{IEXP}}^{N_\lambda=2}$ | $\Delta\Delta G_{\text{DEXP}}^{N_\lambda=2}$ |
|----------------------------------------------|------|----------------------------------------|--------------------------------------------|---------------------------------------------|----------------------------------------------|----------------------------------------------|
| CO <sub>3</sub> <sup>2-</sup>                |      | -165240.53 ± 0.11                      | 0.57 ± 0.28                                | 0.16 ± 0.47                                 | -3.07 ± 0.41                                 | 2.98 ± 0.54                                  |
|                                              | b    | -165222.41 ± 0.06                      | 0.11 ± 0.15                                | 0.11 ± 0.15                                 | 0.04 ± 0.25                                  | 0.66 ± 0.21                                  |
|                                              | ba   | -165287.40 ± 0.05                      | 0.09 ± 0.13                                | 0.04 ± 0.12                                 | -0.13 ± 0.29                                 | 0.39 ± 0.21                                  |
|                                              | bad  | -165339.45 ± 0.05                      | 0.31 ± 0.13                                | 0.18 ± 0.15                                 | 0.20 ± 0.37                                  | 0.33 ± 0.23                                  |
|                                              | badq | -165328.69 ± 0.05                      | 0.03 ± 0.12                                | 0.01 ± 0.11                                 | 0.23 ± 0.25                                  | 0.01 ± 0.19                                  |
| CH <sub>3</sub> NH <sub>3</sub> <sup>+</sup> |      | -60348.42 ± 0.04                       | 0.07 ± 0.09                                | 0.04 ± 0.08                                 | -0.13 ± 0.13                                 | 0.07 ± 0.14                                  |
|                                              | b    | -60352.99 ± 0.02                       | 0.01 ± 0.05                                | 0.00 ± 0.04                                 | 0.06 ± 0.07                                  | 0.01 ± 0.05                                  |
|                                              | ba   | -60355.28 ± 0.01                       | 0.03 ± 0.03                                | 0.04 ± 0.03                                 | 0.02 ± 0.04                                  | 0.02 ± 0.05                                  |
|                                              | bad  | -60355.56 ± 0.02                       | 0.01 ± 0.04                                | 0.01 ± 0.04                                 | 0.04 ± 0.05                                  | -0.03 ± 0.05                                 |
|                                              | badq | -60351.61 ± 0.01                       | 0.06 ± 0.03                                | 0.05 ± 0.03                                 | 0.08 ± 0.04                                  | 0.01 ± 0.05                                  |
| NH <sub>4</sub> <sup>+</sup>                 |      | -35650.57 ± 0.04                       | -0.07 ± 0.08                               | -0.09 ± 0.07                                | -0.09 ± 0.15                                 | 0.01 ± 0.11                                  |
|                                              | b    | -35656.79 ± 0.01                       | 0.01 ± 0.02                                | 0.01 ± 0.01                                 | 0.00 ± 0.02                                  | 0.02 ± 0.02                                  |
|                                              | ba   | -35657.95 ± 0.01                       | 0.00 ± 0.01                                | 0.00 ± 0.01                                 | -0.01 ± 0.01                                 | 0.01 ± 0.01                                  |
|                                              | bad  | -35657.95 ± 0.01                       | 0.00 ± 0.01                                | 0.00 ± 0.01                                 | -0.01 ± 0.01                                 | 0.01 ± 0.01                                  |
|                                              | badq | -35657.18 ± 0.01                       | 0.02 ± 0.02                                | 0.01 ± 0.01                                 | 0.00 ± 0.02                                  | 0.02 ± 0.02                                  |
| CH <sub>3</sub> CO <sub>2</sub> <sup>-</sup> |      | -143235.31 ± 0.07                      | 0.12 ± 0.17                                | -0.03 ± 0.18                                | 0.44 ± 0.49                                  | 0.46 ± 0.32                                  |
|                                              | b    | -143222.40 ± 0.05                      | 0.30 ± 0.12                                | 0.17 ± 0.11                                 | -0.13 ± 0.20                                 | 0.22 ± 0.18                                  |
|                                              | ba   | -143272.32 ± 0.04                      | 0.04 ± 0.11                                | 0.04 ± 0.10                                 | -0.21 ± 0.16                                 | 0.17 ± 0.16                                  |
|                                              | bad  | -143277.15 ± 0.04                      | -0.07 ± 0.10                               | -0.12 ± 0.11                                | -0.35 ± 0.20                                 | 0.20 ± 0.16                                  |
|                                              | badq | -143305.89 ± 0.06                      | 0.11 ± 0.13                                | 0.09 ± 0.15                                 | -0.35 ± 0.29                                 | 0.62 ± 0.32                                  |
| H <sub>3</sub> O <sup>+</sup>                |      | -48062.72 ± 0.05                       | 0.10 ± 0.13                                | 0.01 ± 0.12                                 | 0.30 ± 0.36                                  | -0.58 ± 0.23                                 |
|                                              | b    | -48067.54 ± 0.04                       | -0.03 ± 0.10                               | -0.03 ± 0.10                                | 0.10 ± 0.20                                  | 0.08 ± 0.16                                  |
|                                              | ba   | -48070.58 ± 0.01                       | 0.06 ± 0.03                                | 0.05 ± 0.02                                 | 0.09 ± 0.04                                  | 0.02 ± 0.03                                  |

*Continued on next page*

Table 14 – *Continued from previous page*

| Molec.                            | MM'  | $\Delta G_{\text{TI3}}^{N_i=11}$ | $\Delta\Delta G_{\text{TI}}^{N_i=3}$ | $\Delta\Delta G_{\text{BAR}}^{N_i=3}$ | $\Delta\Delta G_{\text{IEXP}}^{N_i=2}$ | $\Delta\Delta G_{\text{DEXP}}^{N_i=2}$ |
|-----------------------------------|------|----------------------------------|--------------------------------------|---------------------------------------|----------------------------------------|----------------------------------------|
|                                   | bad  | $-48070.58 \pm 0.01$             | $0.06 \pm 0.03$                      | $0.05 \pm 0.02$                       | $0.09 \pm 0.04$                        | $0.02 \pm 0.03$                        |
|                                   | badq | $-48070.60 \pm 0.01$             | $0.04 \pm 0.02$                      | $0.04 \pm 0.02$                       | $0.04 \pm 0.03$                        | $0.06 \pm 0.03$                        |
| C <sub>6</sub> H <sub>5</sub> Cl  |      | $-433851.87 \pm 0.03$            | $0.11 \pm 0.08$                      | $0.14 \pm 0.07$                       | $0.19 \pm 0.10$                        | $-0.03 \pm 0.11$                       |
|                                   | b    | $-433850.81 \pm 0.04$            | $-0.02 \pm 0.09$                     | $0.01 \pm 0.08$                       | $-0.07 \pm 0.10$                       | $0.14 \pm 0.11$                        |
|                                   | ba   | $-433854.43 \pm 0.03$            | $-0.04 \pm 0.09$                     | $-0.01 \pm 0.08$                      | $0.07 \pm 0.10$                        | $-0.26 \pm 0.17$                       |
|                                   | bad  | $-433856.05 \pm 0.03$            | $0.08 \pm 0.09$                      | $0.07 \pm 0.07$                       | $0.13 \pm 0.11$                        | $0.09 \pm 0.11$                        |
|                                   | badq | $-433860.24 \pm 0.04$            | $-0.03 \pm 0.09$                     | $-0.01 \pm 0.08$                      | $0.13 \pm 0.15$                        | $-0.07 \pm 0.11$                       |
| C <sub>6</sub> H <sub>14</sub>    |      | $-148579.99 \pm 0.03$            | $-0.07 \pm 0.07$                     | $-0.07 \pm 0.06$                      | $-0.07 \pm 0.09$                       | $-0.03 \pm 0.09$                       |
|                                   | b    | $-148580.59 \pm 0.03$            | $-0.05 \pm 0.07$                     | $-0.05 \pm 0.06$                      | $-0.06 \pm 0.09$                       | $-0.03 \pm 0.10$                       |
|                                   | ba   | $-148579.49 \pm 0.03$            | $-0.08 \pm 0.07$                     | $-0.07 \pm 0.06$                      | $-0.07 \pm 0.10$                       | $-0.14 \pm 0.14$                       |
|                                   | bad  | $-148579.45 \pm 0.03$            | $-0.11 \pm 0.07$                     | $-0.11 \pm 0.06$                      | $-0.10 \pm 0.09$                       | $-0.11 \pm 0.08$                       |
|                                   | badq | $-148576.82 \pm 0.03$            | $0.10 \pm 0.08$                      | $0.06 \pm 0.07$                       | $0.13 \pm 0.10$                        | $0.00 \pm 0.10$                        |
| CH <sub>3</sub> OH                |      | $-72530.37 \pm 0.03$             | $-0.10 \pm 0.09$                     | $-0.08 \pm 0.08$                      | $-0.05 \pm 0.14$                       | $-0.04 \pm 0.11$                       |
|                                   | b    | $-72530.81 \pm 0.03$             | $0.05 \pm 0.08$                      | $0.03 \pm 0.09$                       | $-0.01 \pm 0.14$                       | $-0.01 \pm 0.13$                       |
|                                   | ba   | $-72530.76 \pm 0.03$             | $-0.04 \pm 0.09$                     | $-0.02 \pm 0.10$                      | $-0.12 \pm 0.14$                       | $-0.07 \pm 0.22$                       |
|                                   | bad  | $-72530.78 \pm 0.03$             | $-0.15 \pm 0.08$                     | $-0.14 \pm 0.08$                      | $-0.20 \pm 0.14$                       | $-0.07 \pm 0.12$                       |
|                                   | badq | $-72530.61 \pm 0.03$             | $0.15 \pm 0.09$                      | $0.10 \pm 0.09$                       | $0.15 \pm 0.16$                        | $-0.09 \pm 0.16$                       |
| C <sub>2</sub> H <sub>6</sub>     |      | $-50024.16 \pm 0.02$             | $0.02 \pm 0.04$                      | $0.03 \pm 0.04$                       | $-0.01 \pm 0.07$                       | $0.02 \pm 0.04$                        |
|                                   | b    | $-50024.32 \pm 0.01$             | $-0.03 \pm 0.03$                     | $-0.03 \pm 0.03$                      | $-0.04 \pm 0.04$                       | $0.00 \pm 0.04$                        |
|                                   | ba   | $-50024.08 \pm 0.01$             | $0.03 \pm 0.03$                      | $0.01 \pm 0.02$                       | $0.01 \pm 0.03$                        | $0.04 \pm 0.03$                        |
|                                   | bad  | $-50024.17 \pm 0.01$             | $0.08 \pm 0.03$                      | $0.07 \pm 0.02$                       | $0.05 \pm 0.04$                        | $0.10 \pm 0.03$                        |
|                                   | badq | $-50024.33 \pm 0.01$             | $-0.02 \pm 0.03$                     | $-0.02 \pm 0.02$                      | $0.00 \pm 0.03$                        | $-0.04 \pm 0.03$                       |
| (CH <sub>2</sub> ) <sub>4</sub> O |      | $-145701.53 \pm 0.05$            | $0.10 \pm 0.11$                      | $0.06 \pm 0.12$                       | $0.06 \pm 0.28$                        | $-0.04 \pm 0.29$                       |
|                                   | b    | $-145701.13 \pm 0.05$            | $-0.03 \pm 0.11$                     | $-0.06 \pm 0.12$                      | $-0.21 \pm 0.24$                       | $0.16 \pm 0.21$                        |

*Continued on next page*



Table 14 – *Continued from previous page*

| Molec.                            | MM'                  | $\Delta G_{\text{TI3}}^{N_i=11}$ | $\Delta\Delta G_{\text{TI}}^{N_i=3}$ | $\Delta\Delta G_{\text{BAR}}^{N_i=3}$ | $\Delta\Delta G_{\text{IEXP}}^{N_i=2}$ | $\Delta\Delta G_{\text{DEXP}}^{N_i=2}$ |             |
|-----------------------------------|----------------------|----------------------------------|--------------------------------------|---------------------------------------|----------------------------------------|----------------------------------------|-------------|
| $\text{C}(\text{NH}_2)_3^+$       | ba                   | -145699.24 ± 0.03                | 0.10 ± 0.09                          | 0.10 ± 0.08                           | 0.21 ± 0.16                            | 0.07 ± 0.15                            |             |
|                                   | bad                  | -145700.24 ± 0.03                | -0.11 ± 0.08                         | -0.13 ± 0.09                          | -0.14 ± 0.13                           | -0.14 ± 0.14                           |             |
|                                   | badq                 | -145684.45 ± 0.03                | 0.11 ± 0.08                          | 0.10 ± 0.07                           | 0.21 ± 0.12                            | -0.03 ± 0.10                           |             |
|                                   | b                    | -128902.19 ± 0.05                | 0.16 ± 0.12                          | -0.08 ± 0.11                          | -0.66 ± 0.15                           | 0.00 ± 0.30                            |             |
|                                   | b                    | -128907.35 ± 0.05                | 0.23 ± 0.12                          | -0.01 ± 0.09                          | 0.22 ± 0.20                            | -0.04 ± 0.16                           |             |
|                                   | ba                   | -128933.28 ± 0.04                | 0.06 ± 0.09                          | -0.09 ± 0.08                          | -0.26 ± 0.23                           | -0.09 ± 0.13                           |             |
|                                   | bad                  | -128936.23 ± 0.04                | 0.22 ± 0.09                          | 0.07 ± 0.07                           | -0.07 ± 0.15                           | 0.07 ± 0.11                            |             |
| $\text{C}_6\text{H}_5\text{NH}_2$ | badq                 | -128918.95 ± 0.04                | 0.02 ± 0.10                          | -0.03 ± 0.09                          | -0.10 ± 0.14                           | -0.22 ± 0.21                           |             |
|                                   | b                    | -180230.53 ± 0.04                | -0.02 ± 0.11                         | 0.00 ± 0.12                           | 0.13 ± 0.18                            | -0.13 ± 0.18                           |             |
|                                   | b                    | -180230.55 ± 0.04                | -0.06 ± 0.10                         | -0.02 ± 0.11                          | -0.14 ± 0.18                           | 0.19 ± 0.16                            |             |
|                                   | ba                   | -180233.99 ± 0.04                | 0.04 ± 0.10                          | 0.03 ± 0.09                           | 0.04 ± 0.16                            | -0.15 ± 0.15                           |             |
|                                   | bad                  | -180233.04 ± 0.04                | 0.13 ± 0.09                          | 0.10 ± 0.08                           | 0.08 ± 0.16                            | 0.13 ± 0.10                            |             |
|                                   | badq                 | -180262.07 ± 0.07                | 0.34 ± 0.16                          | 0.24 ± 0.17                           | 0.10 ± 0.31                            | 0.74 ± 0.38                            |             |
|                                   | ba                   | -131079.14 ± 0.05                | 0.04 ± 0.11                          | 0.08 ± 0.12                           | 0.39 ± 0.16                            | 0.14 ± 0.21                            |             |
| $\text{CH}_3\text{CONH}_2$        | b                    | -131078.83 ± 0.04                | -0.16 ± 0.11                         | -0.09 ± 0.12                          | 0.07 ± 0.30                            | -0.28 ± 0.24                           |             |
|                                   | ba                   | -131083.77 ± 0.04                | 0.06 ± 0.10                          | 0.04 ± 0.10                           | 0.20 ± 0.15                            | 0.17 ± 0.15                            |             |
|                                   | bad                  | -131084.84 ± 0.04                | 0.30 ± 0.09                          | 0.30 ± 0.10                           | 0.18 ± 0.18                            | 0.28 ± 0.24                            |             |
|                                   | badq                 | -131071.30 ± 0.03                | 0.04 ± 0.08                          | 0.04 ± 0.08                           | -0.06 ± 0.11                           | 0.17 ± 0.09                            |             |
|                                   | $\text{H}_2\text{O}$ | b                                | -47896.99 ± 0.03                     | -0.09 ± 0.08                          | -0.08 ± 0.09                           | -0.25 ± 0.11                           | 0.06 ± 0.11 |
|                                   |                      | b                                | -47897.87 ± 0.03                     | -0.01 ± 0.08                          | 0.01 ± 0.09                            | -0.20 ± 0.12                           | 0.01 ± 0.23 |
|                                   |                      | ba                               | -47898.10 ± 0.03                     | 0.07 ± 0.08                           | 0.10 ± 0.09                            | -0.12 ± 0.16                           | 0.26 ± 0.11 |
| bad                               |                      | -47898.10 ± 0.03                 | 0.07 ± 0.08                          | 0.10 ± 0.09                           | -0.12 ± 0.16                           | 0.26 ± 0.11                            |             |
| badq                              |                      | -47897.84 ± 0.03                 | 0.22 ± 0.08                          | 0.18 ± 0.09                           | 0.06 ± 0.14                            | 0.25 ± 0.11                            |             |
| $\text{C}_2\text{H}_5\text{OH}$   |                      | -97165.69 ± 0.04                 | 0.14 ± 0.09                          | 0.15 ± 0.09                           | 0.17 ± 0.15                            | 0.13 ± 0.16                            |             |

*Continued on next page*

Table 14 – *Continued from previous page*

| Molec.                          | MM'  | $\Delta G_{\text{TI3}}^{N_i=11}$ | $\Delta\Delta G_{\text{TI}}^{N_i=3}$ | $\Delta\Delta G_{\text{BAR}}^{N_i=3}$ | $\Delta\Delta G_{\text{IEXP}}^{N_i=2}$ | $\Delta\Delta G_{\text{DEXP}}^{N_i=2}$ |
|---------------------------------|------|----------------------------------|--------------------------------------|---------------------------------------|----------------------------------------|----------------------------------------|
|                                 | b    | $-97165.97 \pm 0.04$             | $0.06 \pm 0.09$                      | $0.07 \pm 0.11$                       | $0.04 \pm 0.20$                        | $0.07 \pm 0.15$                        |
|                                 | ba   | $-97166.30 \pm 0.04$             | $0.04 \pm 0.09$                      | $0.00 \pm 0.09$                       | $0.02 \pm 0.15$                        | $0.09 \pm 0.12$                        |
|                                 | bad  | $-97166.59 \pm 0.04$             | $0.03 \pm 0.09$                      | $-0.01 \pm 0.08$                      | $0.08 \pm 0.16$                        | $0.03 \pm 0.11$                        |
|                                 | badq | $-97165.26 \pm 0.03$             | $-0.06 \pm 0.08$                     | $-0.04 \pm 0.09$                      | $-0.11 \pm 0.13$                       | $-0.12 \pm 0.11$                       |
| $\text{C}_6\text{H}_6$          |      | $-145560.94 \pm 0.02$            | $0.00 \pm 0.05$                      | $0.02 \pm 0.05$                       | $-0.09 \pm 0.08$                       | $0.02 \pm 0.09$                        |
|                                 | b    | $-145561.20 \pm 0.02$            | $-0.03 \pm 0.05$                     | $-0.05 \pm 0.04$                      | $-0.01 \pm 0.08$                       | $-0.17 \pm 0.09$                       |
|                                 | ba   | $-145564.93 \pm 0.02$            | $-0.03 \pm 0.04$                     | $-0.03 \pm 0.04$                      | $-0.09 \pm 0.06$                       | $0.00 \pm 0.06$                        |
|                                 | bad  | $-145563.51 \pm 0.02$            | $0.01 \pm 0.04$                      | $-0.01 \pm 0.05$                      | $-0.01 \pm 0.07$                       | $-0.02 \pm 0.08$                       |
|                                 | badq | $-145563.88 \pm 0.02$            | $0.01 \pm 0.04$                      | $0.00 \pm 0.04$                       | $-0.02 \pm 0.09$                       | $0.01 \pm 0.14$                        |
| $\text{C}_6\text{H}_5\text{OH}$ |      | $-192696.13 \pm 0.03$            | $-0.02 \pm 0.09$                     | $-0.03 \pm 0.08$                      | $-0.02 \pm 0.17$                       | $0.05 \pm 0.12$                        |
|                                 | b    | $-192696.41 \pm 0.04$            | $0.06 \pm 0.09$                      | $0.05 \pm 0.08$                       | $0.03 \pm 0.16$                        | $0.02 \pm 0.15$                        |
|                                 | ba   | $-192700.83 \pm 0.03$            | $-0.04 \pm 0.08$                     | $-0.02 \pm 0.08$                      | $-0.03 \pm 0.13$                       | $0.00 \pm 0.16$                        |
|                                 | bad  | $-192699.26 \pm 0.03$            | $0.04 \pm 0.08$                      | $0.06 \pm 0.07$                       | $-0.05 \pm 0.12$                       | $0.19 \pm 0.12$                        |
|                                 | badq | $-192711.46 \pm 0.06$            | $-0.08 \pm 0.13$                     | $0.01 \pm 0.15$                       | $-0.17 \pm 0.33$                       | $0.63 \pm 0.25$                        |

Table 15: MM-to-QM aqueous-phase solvation free energy correction values from 6- $\lambda$  states simulated for 200 ps

| Molec.                                       | MM'  | $\Delta G_{\text{TI3}}^{N_\lambda=11}$ | $\Delta\Delta G_{\text{TI}}^{N_\lambda=6}$ | $\Delta\Delta G_{\text{BAR}}^{N_\lambda=6}$ | $\Delta\Delta G_{\text{IEXP}}^{N_\lambda=5}$ | $\Delta\Delta G_{\text{DEXP}}^{N_\lambda=5}$ |
|----------------------------------------------|------|----------------------------------------|--------------------------------------------|---------------------------------------------|----------------------------------------------|----------------------------------------------|
| CO <sub>3</sub> <sup>2-</sup>                |      | -165240.53 ± 0.11                      | 0.29 ± 0.20                                | 0.19 ± 0.18                                 | 0.61 ± 0.37                                  | -0.03 ± 0.35                                 |
|                                              | b    | -165222.41 ± 0.06                      | 0.03 ± 0.10                                | 0.02 ± 0.09                                 | -0.11 ± 0.13                                 | 0.21 ± 0.12                                  |
|                                              | ba   | -165287.40 ± 0.05                      | -0.02 ± 0.09                               | -0.03 ± 0.08                                | -0.07 ± 0.12                                 | 0.12 ± 0.10                                  |
|                                              | bad  | -165339.45 ± 0.05                      | -0.21 ± 0.09                               | -0.20 ± 0.09                                | -0.20 ± 0.12                                 | -0.14 ± 0.11                                 |
|                                              | badq | -165328.69 ± 0.05                      | 0.05 ± 0.09                                | 0.06 ± 0.08                                 | 0.12 ± 0.13                                  | 0.02 ± 0.11                                  |
| CH <sub>3</sub> NH <sub>3</sub> <sup>+</sup> |      | -60348.42 ± 0.04                       | -0.07 ± 0.07                               | -0.08 ± 0.06                                | -0.01 ± 0.09                                 | -0.10 ± 0.07                                 |
|                                              | b    | -60352.99 ± 0.02                       | 0.01 ± 0.04                                | 0.01 ± 0.03                                 | 0.00 ± 0.04                                  | 0.01 ± 0.04                                  |
|                                              | ba   | -60355.28 ± 0.01                       | 0.03 ± 0.02                                | 0.03 ± 0.02                                 | 0.03 ± 0.02                                  | 0.03 ± 0.02                                  |
|                                              | bad  | -60355.56 ± 0.02                       | 0.02 ± 0.03                                | 0.02 ± 0.03                                 | 0.03 ± 0.04                                  | 0.01 ± 0.04                                  |
|                                              | badq | -60351.61 ± 0.01                       | 0.02 ± 0.02                                | 0.01 ± 0.02                                 | 0.02 ± 0.02                                  | 0.00 ± 0.03                                  |
| NH <sub>4</sub> <sup>+</sup>                 |      | -35650.57 ± 0.04                       | 0.01 ± 0.06                                | 0.01 ± 0.06                                 | 0.02 ± 0.08                                  | 0.01 ± 0.07                                  |
|                                              | b    | -35656.79 ± 0.01                       | 0.01 ± 0.01                                | 0.01 ± 0.01                                 | 0.00 ± 0.01                                  | 0.01 ± 0.01                                  |
|                                              | ba   | -35657.95 ± 0.01                       | 0.01 ± 0.01                                | 0.01 ± 0.01                                 | 0.01 ± 0.01                                  | 0.01 ± 0.01                                  |
|                                              | bad  | -35657.95 ± 0.01                       | 0.01 ± 0.01                                | 0.01 ± 0.01                                 | 0.01 ± 0.01                                  | 0.01 ± 0.01                                  |
|                                              | badq | -35657.18 ± 0.01                       | -0.01 ± 0.01                               | -0.01 ± 0.01                                | -0.01 ± 0.01                                 | -0.01 ± 0.01                                 |
| CH <sub>3</sub> CO <sub>2</sub> <sup>-</sup> |      | -143235.31 ± 0.07                      | 0.11 ± 0.12                                | 0.06 ± 0.11                                 | 0.08 ± 0.20                                  | 0.13 ± 0.17                                  |
|                                              | b    | -143222.40 ± 0.05                      | 0.00 ± 0.09                                | -0.02 ± 0.08                                | -0.02 ± 0.13                                 | -0.01 ± 0.10                                 |
|                                              | ba   | -143272.32 ± 0.04                      | -0.11 ± 0.07                               | -0.09 ± 0.07                                | -0.16 ± 0.10                                 | -0.02 ± 0.10                                 |
|                                              | bad  | -143277.15 ± 0.04                      | 0.01 ± 0.07                                | -0.01 ± 0.06                                | 0.00 ± 0.09                                  | 0.00 ± 0.09                                  |
|                                              | badq | -143305.89 ± 0.06                      | 0.22 ± 0.10                                | 0.21 ± 0.12                                 | 0.11 ± 0.17                                  | 0.29 ± 0.17                                  |
| H <sub>3</sub> O <sup>+</sup>                |      | -48062.72 ± 0.05                       | 0.03 ± 0.09                                | 0.02 ± 0.08                                 | 0.02 ± 0.11                                  | 0.02 ± 0.10                                  |
|                                              | b    | -48067.54 ± 0.04                       | -0.02 ± 0.07                               | -0.02 ± 0.06                                | -0.01 ± 0.09                                 | 0.03 ± 0.09                                  |
|                                              | ba   | -48070.58 ± 0.01                       | -0.02 ± 0.02                               | -0.02 ± 0.01                                | -0.01 ± 0.02                                 | -0.02 ± 0.02                                 |

*Continued on next page*

Table 15 – *Continued from previous page*

| Molec.                           | MM'  | $\Delta G_{\text{TI3}}^{N_i=11}$ | $\Delta\Delta G_{\text{TI}}^{N_i=6}$ | $\Delta\Delta G_{\text{BAR}}^{N_i=6}$ | $\Delta\Delta G_{\text{IEXP}}^{N_i=5}$ | $\Delta\Delta G_{\text{DEXP}}^{N_i=5}$ |
|----------------------------------|------|----------------------------------|--------------------------------------|---------------------------------------|----------------------------------------|----------------------------------------|
| C <sub>6</sub> H <sub>5</sub> Cl | bad  | -48070.58 ± 0.01                 | -0.02 ± 0.02                         | -0.02 ± 0.01                          | -0.01 ± 0.02                           | -0.02 ± 0.02                           |
|                                  | badq | -48070.60 ± 0.01                 | 0.01 ± 0.02                          | 0.01 ± 0.01                           | 0.01 ± 0.02                            | 0.02 ± 0.02                            |
|                                  |      | -433851.87 ± 0.03                | 0.02 ± 0.05                          | 0.03 ± 0.05                           | 0.05 ± 0.07                            | 0.00 ± 0.07                            |
|                                  | b    | -433850.81 ± 0.04                | 0.03 ± 0.06                          | 0.03 ± 0.06                           | 0.02 ± 0.08                            | 0.05 ± 0.08                            |
|                                  | ba   | -433854.43 ± 0.03                | 0.04 ± 0.06                          | 0.04 ± 0.06                           | 0.05 ± 0.07                            | 0.02 ± 0.08                            |
|                                  | bad  | -433856.05 ± 0.03                | 0.00 ± 0.06                          | 0.00 ± 0.05                           | -0.01 ± 0.07                           | 0.02 ± 0.07                            |
| C <sub>6</sub> H <sub>14</sub>   | badq | -433860.24 ± 0.04                | 0.02 ± 0.06                          | 0.03 ± 0.06                           | 0.05 ± 0.07                            | 0.01 ± 0.07                            |
|                                  |      | -148579.99 ± 0.03                | 0.09 ± 0.05                          | 0.08 ± 0.04                           | 0.09 ± 0.06                            | 0.07 ± 0.06                            |
|                                  | b    | -148580.59 ± 0.03                | 0.02 ± 0.05                          | 0.02 ± 0.04                           | 0.00 ± 0.06                            | 0.03 ± 0.06                            |
|                                  | ba   | -148579.49 ± 0.03                | 0.03 ± 0.05                          | 0.03 ± 0.05                           | 0.04 ± 0.07                            | 0.02 ± 0.06                            |
|                                  | bad  | -148579.45 ± 0.03                | -0.10 ± 0.05                         | -0.11 ± 0.05                          | -0.06 ± 0.08                           | -0.17 ± 0.09                           |
|                                  | badq | -148576.82 ± 0.03                | -0.07 ± 0.05                         | -0.07 ± 0.04                          | -0.05 ± 0.06                           | -0.09 ± 0.06                           |
| CH <sub>3</sub> OH               |      | -72530.37 ± 0.03                 | 0.00 ± 0.06                          | 0.01 ± 0.06                           | 0.01 ± 0.09                            | 0.01 ± 0.08                            |
|                                  | b    | -72530.81 ± 0.03                 | 0.05 ± 0.06                          | 0.03 ± 0.06                           | 0.01 ± 0.09                            | 0.05 ± 0.08                            |
|                                  | ba   | -72530.76 ± 0.03                 | -0.08 ± 0.06                         | -0.08 ± 0.06                          | -0.09 ± 0.08                           | -0.07 ± 0.09                           |
|                                  | bad  | -72530.78 ± 0.03                 | 0.00 ± 0.05                          | 0.00 ± 0.05                           | -0.03 ± 0.09                           | 0.04 ± 0.08                            |
|                                  | badq | -72530.61 ± 0.03                 | -0.02 ± 0.06                         | -0.03 ± 0.06                          | -0.03 ± 0.08                           | -0.07 ± 0.08                           |
|                                  |      | -50024.16 ± 0.02                 | 0.01 ± 0.03                          | 0.01 ± 0.03                           | 0.00 ± 0.04                            | 0.01 ± 0.04                            |
| C <sub>2</sub> H <sub>6</sub>    | b    | -50024.32 ± 0.01                 | -0.01 ± 0.02                         | -0.01 ± 0.02                          | -0.02 ± 0.02                           | -0.01 ± 0.02                           |
|                                  | ba   | -50024.08 ± 0.01                 | -0.01 ± 0.02                         | -0.01 ± 0.01                          | -0.02 ± 0.02                           | -0.01 ± 0.02                           |
|                                  | bad  | -50024.17 ± 0.01                 | 0.02 ± 0.02                          | 0.02 ± 0.01                           | 0.00 ± 0.02                            | 0.03 ± 0.02                            |
|                                  | badq | -50024.33 ± 0.01                 | 0.02 ± 0.02                          | 0.02 ± 0.01                           | 0.01 ± 0.02                            | 0.02 ± 0.02                            |
|                                  |      | -145701.53 ± 0.05                | -0.03 ± 0.08                         | -0.03 ± 0.07                          | -0.02 ± 0.10                           | -0.07 ± 0.11                           |
|                                  | b    | -145701.13 ± 0.05                | 0.00 ± 0.09                          | 0.01 ± 0.08                           | -0.09 ± 0.10                           | 0.07 ± 0.10                            |

*Continued on next page*

Table 15 – *Continued from previous page*

| Molec.                                        | MM'  | $\Delta G_{\text{TI3}}^{N_i=11}$ | $\Delta\Delta G_{\text{TI}}^{N_i=6}$ | $\Delta\Delta G_{\text{BAR}}^{N_i=6}$ | $\Delta\Delta G_{\text{IEXP}}^{N_i=5}$ | $\Delta\Delta G_{\text{DEXP}}^{N_i=5}$ |
|-----------------------------------------------|------|----------------------------------|--------------------------------------|---------------------------------------|----------------------------------------|----------------------------------------|
| C(NH <sub>2</sub> ) <sub>3</sub> <sup>+</sup> | ba   | -145699.24 ± 0.03                | 0.02 ± 0.06                          | 0.02 ± 0.06                           | 0.00 ± 0.08                            | 0.06 ± 0.08                            |
|                                               | bad  | -145700.24 ± 0.03                | -0.10 ± 0.06                         | -0.11 ± 0.06                          | -0.10 ± 0.08                           | -0.12 ± 0.09                           |
|                                               | badq | -145684.45 ± 0.03                | -0.02 ± 0.06                         | -0.02 ± 0.05                          | 0.01 ± 0.07                            | -0.04 ± 0.07                           |
|                                               | b    | -128902.19 ± 0.05                | -0.04 ± 0.09                         | -0.08 ± 0.08                          | -0.10 ± 0.13                           | -0.06 ± 0.10                           |
|                                               | b    | -128907.35 ± 0.05                | 0.12 ± 0.09                          | 0.06 ± 0.07                           | 0.05 ± 0.10                            | 0.06 ± 0.09                            |
|                                               | ba   | -128933.28 ± 0.04                | -0.03 ± 0.07                         | -0.06 ± 0.06                          | -0.03 ± 0.10                           | -0.09 ± 0.08                           |
| C <sub>6</sub> H <sub>5</sub> NH <sub>2</sub> | bad  | -128936.23 ± 0.04                | -0.02 ± 0.06                         | -0.04 ± 0.06                          | -0.10 ± 0.07                           | -0.03 ± 0.07                           |
|                                               | badq | -128918.95 ± 0.04                | 0.02 ± 0.07                          | 0.01 ± 0.06                           | 0.05 ± 0.09                            | -0.04 ± 0.09                           |
|                                               | b    | -180230.53 ± 0.04                | 0.10 ± 0.07                          | 0.11 ± 0.07                           | 0.08 ± 0.11                            | 0.08 ± 0.10                            |
|                                               | b    | -180230.55 ± 0.04                | -0.02 ± 0.07                         | 0.00 ± 0.06                           | -0.01 ± 0.09                           | 0.02 ± 0.09                            |
|                                               | ba   | -180233.99 ± 0.04                | 0.02 ± 0.06                          | 0.01 ± 0.06                           | 0.03 ± 0.10                            | -0.02 ± 0.08                           |
|                                               | bad  | -180233.04 ± 0.04                | -0.02 ± 0.06                         | -0.03 ± 0.06                          | -0.02 ± 0.09                           | -0.04 ± 0.08                           |
| CH <sub>3</sub> CONH <sub>2</sub>             | badq | -180262.07 ± 0.07                | -0.16 ± 0.11                         | -0.16 ± 0.11                          | -0.12 ± 0.16                           | -0.10 ± 0.15                           |
|                                               | b    | -131079.14 ± 0.05                | -0.01 ± 0.09                         | 0.00 ± 0.08                           | 0.04 ± 0.10                            | -0.04 ± 0.11                           |
|                                               | b    | -131078.83 ± 0.04                | 0.04 ± 0.07                          | 0.05 ± 0.07                           | 0.05 ± 0.11                            | 0.10 ± 0.10                            |
|                                               | ba   | -131083.77 ± 0.04                | -0.01 ± 0.06                         | -0.01 ± 0.06                          | -0.02 ± 0.08                           | 0.01 ± 0.08                            |
|                                               | bad  | -131084.84 ± 0.04                | -0.01 ± 0.07                         | 0.00 ± 0.07                           | 0.03 ± 0.09                            | -0.07 ± 0.12                           |
|                                               | badq | -131071.30 ± 0.03                | -0.11 ± 0.06                         | -0.10 ± 0.06                          | -0.07 ± 0.09                           | -0.12 ± 0.08                           |
| H <sub>2</sub> O                              | b    | -47896.99 ± 0.03                 | -0.07 ± 0.06                         | -0.05 ± 0.06                          | -0.07 ± 0.09                           | -0.04 ± 0.08                           |
|                                               | b    | -47897.87 ± 0.03                 | 0.02 ± 0.06                          | 0.02 ± 0.06                           | 0.01 ± 0.09                            | 0.02 ± 0.08                            |
|                                               | ba   | -47898.10 ± 0.03                 | 0.04 ± 0.06                          | 0.05 ± 0.07                           | -0.01 ± 0.09                           | 0.10 ± 0.09                            |
|                                               | bad  | -47898.10 ± 0.03                 | 0.04 ± 0.06                          | 0.05 ± 0.07                           | -0.01 ± 0.09                           | 0.10 ± 0.09                            |
|                                               | badq | -47897.84 ± 0.03                 | -0.03 ± 0.06                         | -0.02 ± 0.07                          | -0.02 ± 0.09                           | -0.04 ± 0.12                           |
| C <sub>2</sub> H <sub>5</sub> OH              |      | -97165.69 ± 0.04                 | -0.01 ± 0.06                         | 0.01 ± 0.06                           | 0.02 ± 0.08                            | -0.01 ± 0.10                           |

*Continued on next page*

Table 15 – *Continued from previous page*

| Molec.                          | MM'  | $\Delta G_{\text{TI3}}^{N_i=11}$ | $\Delta\Delta G_{\text{TI}}^{N_i=6}$ | $\Delta\Delta G_{\text{BAR}}^{N_i=6}$ | $\Delta\Delta G_{\text{IEXP}}^{N_i=5}$ | $\Delta\Delta G_{\text{DEXP}}^{N_i=5}$ |
|---------------------------------|------|----------------------------------|--------------------------------------|---------------------------------------|----------------------------------------|----------------------------------------|
|                                 | b    | $-97165.97 \pm 0.04$             | $-0.04 \pm 0.06$                     | $-0.03 \pm 0.06$                      | $-0.02 \pm 0.09$                       | $-0.03 \pm 0.09$                       |
|                                 | ba   | $-97166.30 \pm 0.04$             | $-0.02 \pm 0.06$                     | $-0.03 \pm 0.06$                      | $0.00 \pm 0.10$                        | $-0.03 \pm 0.09$                       |
|                                 | bad  | $-97166.59 \pm 0.04$             | $-0.04 \pm 0.06$                     | $-0.05 \pm 0.07$                      | $-0.05 \pm 0.10$                       | $-0.04 \pm 0.09$                       |
|                                 | badq | $-97165.26 \pm 0.03$             | $0.03 \pm 0.06$                      | $0.03 \pm 0.06$                       | $0.02 \pm 0.09$                        | $0.00 \pm 0.09$                        |
| $\text{C}_6\text{H}_6$          |      | $-145560.94 \pm 0.02$            | $0.06 \pm 0.04$                      | $0.05 \pm 0.04$                       | $0.02 \pm 0.04$                        | $0.08 \pm 0.04$                        |
|                                 | b    | $-145561.20 \pm 0.02$            | $-0.03 \pm 0.04$                     | $-0.04 \pm 0.04$                      | $-0.04 \pm 0.04$                       | $-0.05 \pm 0.04$                       |
|                                 | ba   | $-145564.93 \pm 0.02$            | $0.03 \pm 0.04$                      | $0.03 \pm 0.04$                       | $0.02 \pm 0.04$                        | $0.04 \pm 0.04$                        |
|                                 | bad  | $-145563.51 \pm 0.02$            | $-0.04 \pm 0.04$                     | $-0.04 \pm 0.03$                      | $-0.06 \pm 0.04$                       | $-0.03 \pm 0.04$                       |
|                                 | badq | $-145563.88 \pm 0.02$            | $-0.01 \pm 0.04$                     | $-0.02 \pm 0.03$                      | $-0.02 \pm 0.04$                       | $-0.01 \pm 0.04$                       |
| $\text{C}_6\text{H}_5\text{OH}$ |      | $-192696.13 \pm 0.03$            | $0.08 \pm 0.06$                      | $0.06 \pm 0.06$                       | $0.04 \pm 0.09$                        | $0.09 \pm 0.08$                        |
|                                 | b    | $-192696.41 \pm 0.04$            | $0.00 \pm 0.06$                      | $0.00 \pm 0.06$                       | $0.05 \pm 0.08$                        | $-0.06 \pm 0.08$                       |
|                                 | ba   | $-192700.83 \pm 0.03$            | $-0.02 \pm 0.06$                     | $-0.01 \pm 0.05$                      | $0.00 \pm 0.07$                        | $0.00 \pm 0.07$                        |
|                                 | bad  | $-192699.26 \pm 0.03$            | $-0.02 \pm 0.06$                     | $-0.02 \pm 0.05$                      | $-0.04 \pm 0.07$                       | $0.01 \pm 0.07$                        |
|                                 | badq | $-192711.46 \pm 0.06$            | $-0.05 \pm 0.11$                     | $-0.05 \pm 0.11$                      | $0.01 \pm 0.15$                        | $-0.01 \pm 0.14$                       |

Table 16: MM-to-QM aqueous-phase solvation free energy correction values from 2- $\lambda$  states simulated for 100 ps

| Molec.                                       | MM'  | $\Delta G_{\text{TI3}}^{N_\lambda=11}$ | $\Delta\Delta G_{\text{TI}}^{N_\lambda=2}$ | $\Delta\Delta G_{\text{BAR}}^{N_\lambda=2}$ | $\Delta\Delta G_{\text{IEXP}}^{N_\lambda=1}$ | $\Delta\Delta G_{\text{DEXP}}^{N_\lambda=1}$ |
|----------------------------------------------|------|----------------------------------------|--------------------------------------------|---------------------------------------------|----------------------------------------------|----------------------------------------------|
| CO <sub>3</sub> <sup>2-</sup>                |      | -165240.53 ± 0.11                      | 5.06 ± 0.53                                | -1.62 ± 0.69                                | -9.97 ± 0.38                                 | 6.74 ± 0.58                                  |
|                                              | b    | -165222.41 ± 0.06                      | 1.62 ± 0.25                                | 0.61 ± 0.47                                 | -1.28 ± 0.45                                 | 2.17 ± 0.46                                  |
|                                              | ba   | -165287.40 ± 0.05                      | 0.49 ± 0.20                                | 0.04 ± 0.38                                 | -1.00 ± 0.31                                 | 1.04 ± 0.44                                  |
|                                              | bad  | -165339.45 ± 0.05                      | 0.62 ± 0.20                                | -0.27 ± 0.32                                | -0.91 ± 0.46                                 | 1.01 ± 0.26                                  |
|                                              | badq | -165328.69 ± 0.05                      | 0.41 ± 0.19                                | -0.20 ± 0.25                                | -0.81 ± 0.47                                 | 0.97 ± 0.26                                  |
| CH <sub>3</sub> NH <sub>3</sub> <sup>+</sup> |      | -60348.42 ± 0.04                       | 0.54 ± 0.15                                | -0.04 ± 0.20                                | -0.59 ± 0.27                                 | 0.28 ± 0.25                                  |
|                                              | b    | -60352.99 ± 0.02                       | 0.05 ± 0.07                                | -0.03 ± 0.09                                | -0.02 ± 0.22                                 | 0.06 ± 0.11                                  |
|                                              | ba   | -60355.28 ± 0.01                       | 0.04 ± 0.05                                | 0.03 ± 0.07                                 | 0.11 ± 0.12                                  | 0.14 ± 0.08                                  |
|                                              | bad  | -60355.56 ± 0.02                       | 0.05 ± 0.05                                | 0.04 ± 0.07                                 | 0.11 ± 0.11                                  | 0.14 ± 0.09                                  |
|                                              | badq | -60351.61 ± 0.01                       | 0.04 ± 0.05                                | 0.03 ± 0.06                                 | 0.07 ± 0.18                                  | -0.05 ± 0.10                                 |
| NH <sub>4</sub> <sup>+</sup>                 |      | -35650.57 ± 0.04                       | 0.07 ± 0.14                                | -0.35 ± 0.22                                | -0.32 ± 0.32                                 | -1.55 ± 0.58                                 |
|                                              | b    | -35656.79 ± 0.01                       | -0.02 ± 0.02                               | -0.02 ± 0.02                                | -0.05 ± 0.04                                 | -0.02 ± 0.04                                 |
|                                              | ba   | -35657.95 ± 0.01                       | 0.00 ± 0.02                                | -0.01 ± 0.02                                | -0.05 ± 0.04                                 | 0.05 ± 0.03                                  |
|                                              | bad  | -35657.95 ± 0.01                       | 0.00 ± 0.02                                | -0.01 ± 0.02                                | -0.05 ± 0.04                                 | 0.05 ± 0.03                                  |
|                                              | badq | -35657.18 ± 0.01                       | 0.02 ± 0.02                                | 0.02 ± 0.03                                 | -0.06 ± 0.04                                 | 0.09 ± 0.04                                  |
| CH <sub>3</sub> CO <sub>2</sub> <sup>-</sup> |      | -143235.31 ± 0.07                      | 0.88 ± 0.32                                | 0.88 ± 0.64                                 | -0.71 ± 0.57                                 | 2.99 ± 0.50                                  |
|                                              | b    | -143222.40 ± 0.05                      | 0.74 ± 0.19                                | 0.19 ± 0.34                                 | -0.92 ± 0.40                                 | 1.44 ± 0.29                                  |
|                                              | ba   | -143272.32 ± 0.04                      | 0.17 ± 0.16                                | 0.01 ± 0.26                                 | -1.04 ± 0.24                                 | 0.68 ± 0.23                                  |
|                                              | bad  | -143277.15 ± 0.04                      | 0.18 ± 0.16                                | -0.07 ± 0.30                                | -1.23 ± 0.37                                 | -0.39 ± 0.57                                 |
|                                              | badq | -143305.89 ± 0.06                      | -0.65 ± 0.21                               | -0.39 ± 0.40                                | -1.69 ± 0.36                                 | -0.30 ± 0.38                                 |
| H <sub>3</sub> O <sup>+</sup>                |      | -48062.72 ± 0.05                       | -0.02 ± 0.19                               | -0.78 ± 0.37                                | -3.03 ± 0.20                                 | 1.41 ± 0.34                                  |
|                                              | b    | -48067.54 ± 0.04                       | -0.12 ± 0.16                               | -0.56 ± 0.24                                | -1.71 ± 0.25                                 | -0.13 ± 0.36                                 |
|                                              | ba   | -48070.58 ± 0.01                       | -0.09 ± 0.04                               | -0.09 ± 0.04                                | -0.10 ± 0.07                                 | -0.10 ± 0.06                                 |

*Continued on next page*

Table 16 – *Continued from previous page*

| Molec.                          | MM'  | $\Delta G_{\text{TI3}}^{N_i=11}$ | $\Delta\Delta G_{\text{TI}}^{N_i=2}$ | $\Delta\Delta G_{\text{BAR}}^{N_i=2}$ | $\Delta\Delta G_{\text{IEXP}}^{N_i=1}$ | $\Delta\Delta G_{\text{DEXP}}^{N_i=1}$ |
|---------------------------------|------|----------------------------------|--------------------------------------|---------------------------------------|----------------------------------------|----------------------------------------|
|                                 | bad  | $-48070.58 \pm 0.01$             | $-0.09 \pm 0.04$                     | $-0.09 \pm 0.04$                      | $-0.10 \pm 0.07$                       | $-0.10 \pm 0.06$                       |
|                                 | badq | $-48070.60 \pm 0.01$             | $-0.05 \pm 0.04$                     | $-0.06 \pm 0.04$                      | $-0.11 \pm 0.06$                       | $-0.07 \pm 0.06$                       |
| $\text{C}_6\text{H}_5\text{Cl}$ |      | $-433851.87 \pm 0.03$            | $-0.03 \pm 0.10$                     | $0.04 \pm 0.12$                       | $0.19 \pm 0.26$                        | $0.32 \pm 0.14$                        |
|                                 | b    | $-433850.81 \pm 0.04$            | $0.15 \pm 0.10$                      | $0.21 \pm 0.11$                       | $-0.02 \pm 0.14$                       | $0.51 \pm 0.17$                        |
|                                 | ba   | $-433854.43 \pm 0.03$            | $0.05 \pm 0.09$                      | $0.05 \pm 0.11$                       | $-0.10 \pm 0.12$                       | $-0.39 \pm 0.34$                       |
|                                 | bad  | $-433856.05 \pm 0.03$            | $0.09 \pm 0.09$                      | $0.11 \pm 0.09$                       | $-0.11 \pm 0.13$                       | $0.20 \pm 0.22$                        |
|                                 | badq | $-433860.24 \pm 0.04$            | $0.07 \pm 0.09$                      | $0.11 \pm 0.10$                       | $0.31 \pm 0.35$                        | $0.01 \pm 0.15$                        |
| $\text{C}_6\text{H}_{14}$       |      | $-148579.99 \pm 0.03$            | $-0.28 \pm 0.10$                     | $-0.17 \pm 0.10$                      | $-0.20 \pm 0.27$                       | $0.02 \pm 0.19$                        |
|                                 | b    | $-148580.59 \pm 0.03$            | $0.01 \pm 0.09$                      | $0.04 \pm 0.12$                       | $0.02 \pm 0.14$                        | $0.30 \pm 0.14$                        |
|                                 | ba   | $-148579.49 \pm 0.03$            | $-0.20 \pm 0.09$                     | $-0.23 \pm 0.12$                      | $-0.33 \pm 0.17$                       | $-0.04 \pm 0.17$                       |
|                                 | bad  | $-148579.45 \pm 0.03$            | $-0.18 \pm 0.09$                     | $-0.14 \pm 0.10$                      | $-0.26 \pm 0.16$                       | $0.15 \pm 0.11$                        |
|                                 | badq | $-148576.82 \pm 0.03$            | $0.09 \pm 0.10$                      | $0.15 \pm 0.12$                       | $-0.29 \pm 0.16$                       | $0.55 \pm 0.16$                        |
| $\text{CH}_3\text{OH}$          |      | $-72530.37 \pm 0.03$             | $-0.12 \pm 0.12$                     | $-0.08 \pm 0.30$                      | $-0.11 \pm 0.26$                       | $0.07 \pm 0.38$                        |
|                                 | b    | $-72530.81 \pm 0.03$             | $-0.16 \pm 0.12$                     | $-0.05 \pm 0.18$                      | $-0.06 \pm 0.24$                       | $-0.60 \pm 0.30$                       |
|                                 | ba   | $-72530.76 \pm 0.03$             | $0.05 \pm 0.11$                      | $0.18 \pm 0.23$                       | $-0.14 \pm 0.24$                       | $0.67 \pm 0.23$                        |
|                                 | bad  | $-72530.78 \pm 0.03$             | $0.09 \pm 0.11$                      | $0.21 \pm 0.22$                       | $-0.14 \pm 0.30$                       | $0.22 \pm 0.32$                        |
|                                 | badq | $-72530.61 \pm 0.03$             | $-0.02 \pm 0.11$                     | $0.00 \pm 0.18$                       | $0.20 \pm 0.36$                        | $-0.12 \pm 0.24$                       |
| $\text{C}_2\text{H}_6$          |      | $-50024.16 \pm 0.02$             | $0.05 \pm 0.09$                      | $0.09 \pm 0.07$                       | $-0.03 \pm 0.12$                       | $0.12 \pm 0.11$                        |
|                                 | b    | $-50024.32 \pm 0.01$             | $-0.07 \pm 0.05$                     | $-0.05 \pm 0.06$                      | $-0.15 \pm 0.08$                       | $-0.11 \pm 0.23$                       |
|                                 | ba   | $-50024.08 \pm 0.01$             | $-0.03 \pm 0.05$                     | $-0.02 \pm 0.05$                      | $-0.06 \pm 0.09$                       | $0.07 \pm 0.06$                        |
|                                 | bad  | $-50024.17 \pm 0.01$             | $-0.12 \pm 0.05$                     | $-0.09 \pm 0.05$                      | $-0.05 \pm 0.11$                       | $-0.25 \pm 0.14$                       |
|                                 | badq | $-50024.33 \pm 0.01$             | $-0.05 \pm 0.05$                     | $-0.04 \pm 0.04$                      | $-0.05 \pm 0.11$                       | $0.02 \pm 0.07$                        |
| $(\text{CH}_2)_4\text{O}$       |      | $-145701.53 \pm 0.05$            | $0.01 \pm 0.17$                      | $-0.38 \pm 0.25$                      | $-1.20 \pm 0.31$                       | $0.67 \pm 0.20$                        |
|                                 | b    | $-145701.13 \pm 0.05$            | $0.31 \pm 0.16$                      | $0.12 \pm 0.33$                       | $-1.45 \pm 0.26$                       | $1.16 \pm 0.32$                        |

*Continued on next page*



Table 16 – *Continued from previous page*

| Molec.                                        | MM'  | $\Delta G_{\text{TI3}}^{N_i=11}$ | $\Delta\Delta G_{\text{TI}}^{N_i=2}$ | $\Delta\Delta G_{\text{BAR}}^{N_i=2}$ | $\Delta\Delta G_{\text{IEXP}}^{N_i=1}$ | $\Delta\Delta G_{\text{DEXP}}^{N_i=1}$ |
|-----------------------------------------------|------|----------------------------------|--------------------------------------|---------------------------------------|----------------------------------------|----------------------------------------|
| C(NH <sub>2</sub> ) <sub>3</sub> <sup>+</sup> | ba   | -145699.24 ± 0.03                | 0.16 ± 0.11                          | 0.37 ± 0.23                           | 0.43 ± 0.45                            | -0.01 ± 0.54                           |
|                                               | bad  | -145700.24 ± 0.03                | -0.05 ± 0.12                         | -0.05 ± 0.19                          | 0.42 ± 0.36                            | 0.19 ± 0.35                            |
|                                               | badq | -145684.45 ± 0.03                | 0.07 ± 0.13                          | 0.04 ± 0.15                           | 0.06 ± 0.35                            | 0.03 ± 0.20                            |
|                                               | b    | -128902.19 ± 0.05                | 1.61 ± 0.26                          | -0.37 ± 0.25                          | -0.86 ± 0.49                           | 0.38 ± 0.27                            |
|                                               | ba   | -128907.35 ± 0.05                | 0.60 ± 0.21                          | -0.10 ± 0.21                          | -0.17 ± 0.21                           | 0.20 ± 0.26                            |
|                                               | bad  | -128933.28 ± 0.04                | 0.63 ± 0.19                          | 0.08 ± 0.17                           | 0.03 ± 0.27                            | 0.69 ± 0.16                            |
| C <sub>6</sub> H <sub>5</sub> NH <sub>2</sub> | bad  | -128936.23 ± 0.04                | 0.57 ± 0.18                          | 0.05 ± 0.16                           | 0.19 ± 0.33                            | 0.60 ± 0.15                            |
|                                               | badq | -128918.95 ± 0.04                | 0.11 ± 0.17                          | 0.03 ± 0.19                           | -0.07 ± 0.27                           | -1.05 ± 0.55                           |
|                                               | b    | -180230.53 ± 0.04                | 0.25 ± 0.15                          | 0.05 ± 0.21                           | -0.87 ± 0.34                           | 0.57 ± 0.25                            |
|                                               | b    | -180230.55 ± 0.04                | 0.18 ± 0.15                          | -0.11 ± 0.18                          | -0.67 ± 0.29                           | -1.12 ± 0.49                           |
|                                               | ba   | -180233.99 ± 0.04                | 0.10 ± 0.12                          | -0.13 ± 0.18                          | -0.46 ± 0.22                           | -0.61 ± 0.33                           |
|                                               | bad  | -180233.04 ± 0.04                | 0.44 ± 0.14                          | 0.01 ± 0.16                           | -0.32 ± 0.16                           | -0.16 ± 0.29                           |
| CH <sub>3</sub> CONH <sub>2</sub>             | badq | -180262.07 ± 0.07                | -0.12 ± 0.24                         | -0.08 ± 0.62                          | -2.65 ± 0.52                           | 2.34 ± 0.44                            |
|                                               | b    | -131079.14 ± 0.05                | -0.43 ± 0.16                         | -0.24 ± 0.27                          | -0.26 ± 0.40                           | -0.33 ± 0.44                           |
|                                               | b    | -131078.83 ± 0.04                | -0.31 ± 0.15                         | -0.41 ± 0.20                          | -0.40 ± 0.45                           | 0.16 ± 0.28                            |
|                                               | ba   | -131083.77 ± 0.04                | 0.09 ± 0.13                          | 0.19 ± 0.23                           | -0.67 ± 0.26                           | 1.28 ± 0.21                            |
|                                               | bad  | -131084.84 ± 0.04                | -0.10 ± 0.13                         | -0.07 ± 0.22                          | -0.65 ± 0.26                           | 0.87 ± 0.21                            |
|                                               | badq | -131071.30 ± 0.03                | 0.22 ± 0.10                          | 0.26 ± 0.17                           | -0.49 ± 0.16                           | 0.97 ± 0.28                            |
| H <sub>2</sub> O                              | b    | -47896.99 ± 0.03                 | -0.02 ± 0.11                         | -0.15 ± 0.19                          | -0.11 ± 0.37                           | 0.42 ± 0.18                            |
|                                               | b    | -47897.87 ± 0.03                 | -0.01 ± 0.10                         | -0.08 ± 0.18                          | -0.30 ± 0.31                           | 0.13 ± 0.29                            |
|                                               | ba   | -47898.10 ± 0.03                 | 0.15 ± 0.11                          | 0.01 ± 0.19                           | -0.36 ± 0.30                           | 0.51 ± 0.22                            |
|                                               | bad  | -47898.10 ± 0.03                 | 0.15 ± 0.11                          | 0.01 ± 0.19                           | -0.36 ± 0.30                           | 0.51 ± 0.22                            |
|                                               | badq | -47897.84 ± 0.03                 | 0.12 ± 0.10                          | 0.07 ± 0.20                           | -0.40 ± 0.28                           | 0.68 ± 0.23                            |
| C <sub>2</sub> H <sub>5</sub> OH              |      | -97165.69 ± 0.04                 | -0.03 ± 0.13                         | -0.09 ± 0.21                          | -0.59 ± 0.32                           | 0.70 ± 0.19                            |

*Continued on next page*

Table 16 – *Continued from previous page*

| Molec.                          | MM'  | $\Delta G_{\text{TI3}}^{N_i=11}$ | $\Delta\Delta G_{\text{TI}}^{N_i=2}$ | $\Delta\Delta G_{\text{BAR}}^{N_i=2}$ | $\Delta\Delta G_{\text{IEXP}}^{N_i=1}$ | $\Delta\Delta G_{\text{DEXP}}^{N_i=1}$ |
|---------------------------------|------|----------------------------------|--------------------------------------|---------------------------------------|----------------------------------------|----------------------------------------|
|                                 | b    | $-97165.97 \pm 0.04$             | $-0.12 \pm 0.13$                     | $-0.15 \pm 0.20$                      | $-0.39 \pm 0.54$                       | $0.36 \pm 0.21$                        |
|                                 | ba   | $-97166.30 \pm 0.04$             | $0.42 \pm 0.12$                      | $0.35 \pm 0.23$                       | $-0.45 \pm 0.16$                       | $0.90 \pm 0.39$                        |
|                                 | bad  | $-97166.59 \pm 0.04$             | $0.09 \pm 0.13$                      | $-0.07 \pm 0.21$                      | $-0.46 \pm 0.50$                       | $0.37 \pm 0.26$                        |
|                                 | badq | $-97165.26 \pm 0.03$             | $0.20 \pm 0.11$                      | $0.20 \pm 0.23$                       | $-0.38 \pm 0.44$                       | $0.49 \pm 0.22$                        |
| $\text{C}_6\text{H}_6$          |      | $-145560.94 \pm 0.02$            | $0.12 \pm 0.09$                      | $0.11 \pm 0.10$                       | $0.28 \pm 0.14$                        | $-0.21 \pm 0.24$                       |
|                                 | b    | $-145561.20 \pm 0.02$            | $0.19 \pm 0.07$                      | $0.18 \pm 0.08$                       | $0.29 \pm 0.14$                        | $0.25 \pm 0.11$                        |
|                                 | ba   | $-145564.93 \pm 0.02$            | $0.03 \pm 0.07$                      | $-0.01 \pm 0.07$                      | $0.31 \pm 0.13$                        | $-0.03 \pm 0.10$                       |
|                                 | bad  | $-145563.51 \pm 0.02$            | $0.17 \pm 0.08$                      | $0.07 \pm 0.09$                       | $0.25 \pm 0.13$                        | $0.02 \pm 0.14$                        |
|                                 | badq | $-145563.88 \pm 0.02$            | $0.05 \pm 0.07$                      | $0.05 \pm 0.08$                       | $0.25 \pm 0.12$                        | $-0.13 \pm 0.14$                       |
| $\text{C}_6\text{H}_5\text{OH}$ |      | $-192696.13 \pm 0.03$            | $-0.11 \pm 0.13$                     | $-0.17 \pm 0.21$                      | $0.12 \pm 0.53$                        | $-0.06 \pm 0.24$                       |
|                                 | b    | $-192696.41 \pm 0.04$            | $-0.14 \pm 0.12$                     | $-0.07 \pm 0.20$                      | $-0.08 \pm 0.44$                       | $0.56 \pm 0.28$                        |
|                                 | ba   | $-192700.83 \pm 0.03$            | $-0.07 \pm 0.11$                     | $-0.01 \pm 0.18$                      | $-0.22 \pm 0.38$                       | $0.96 \pm 0.16$                        |
|                                 | bad  | $-192699.26 \pm 0.03$            | $-0.38 \pm 0.11$                     | $-0.40 \pm 0.20$                      | $-0.20 \pm 0.20$                       | $-0.96 \pm 0.53$                       |
|                                 | badq | $-192711.46 \pm 0.06$            | $-0.50 \pm 0.22$                     | $-0.43 \pm 0.43$                      | $-2.42 \pm 0.36$                       | $1.42 \pm 0.33$                        |

Table 17: MM-to-QM aqueous-phase solvation free energy correction values from 3- $\lambda$  states simulated for 100 ps

| Molec.                                       | MM'  | $\Delta G_{\text{TI3}}^{N_\lambda=11}$ | $\Delta\Delta G_{\text{TI}}^{N_\lambda=3}$ | $\Delta\Delta G_{\text{BAR}}^{N_\lambda=3}$ | $\Delta\Delta G_{\text{IEXP}}^{N_\lambda=2}$ | $\Delta\Delta G_{\text{DEXP}}^{N_\lambda=2}$ |
|----------------------------------------------|------|----------------------------------------|--------------------------------------------|---------------------------------------------|----------------------------------------------|----------------------------------------------|
| CO <sub>3</sub> <sup>2-</sup>                |      | -165240.53 ± 0.11                      | 1.25 ± 0.38                                | 0.40 ± 0.62                                 | -3.02 ± 0.47                                 | 1.69 ± 0.56                                  |
|                                              | b    | -165222.41 ± 0.06                      | 0.06 ± 0.21                                | 0.02 ± 0.18                                 | -0.30 ± 0.35                                 | 0.39 ± 0.30                                  |
|                                              | ba   | -165287.40 ± 0.05                      | -0.02 ± 0.17                               | -0.06 ± 0.16                                | -0.31 ± 0.26                                 | 0.08 ± 0.33                                  |
|                                              | bad  | -165339.45 ± 0.05                      | -0.03 ± 0.17                               | -0.08 ± 0.18                                | -0.67 ± 0.27                                 | -0.27 ± 0.33                                 |
|                                              | badq | -165328.69 ± 0.05                      | -0.45 ± 0.19                               | -0.43 ± 0.14                                | -0.30 ± 0.25                                 | -0.97 ± 0.40                                 |
| CH <sub>3</sub> NH <sub>3</sub> <sup>+</sup> |      | -60348.42 ± 0.04                       | 0.17 ± 0.13                                | 0.12 ± 0.12                                 | 0.22 ± 0.35                                  | 0.11 ± 0.20                                  |
|                                              | b    | -60352.99 ± 0.02                       | -0.11 ± 0.07                               | -0.10 ± 0.06                                | -0.07 ± 0.09                                 | -0.07 ± 0.09                                 |
|                                              | ba   | -60355.28 ± 0.01                       | 0.05 ± 0.05                                | 0.05 ± 0.04                                 | 0.06 ± 0.06                                  | 0.06 ± 0.06                                  |
|                                              | bad  | -60355.56 ± 0.02                       | -0.04 ± 0.04                               | -0.02 ± 0.06                                | -0.05 ± 0.09                                 | 0.03 ± 0.07                                  |
|                                              | badq | -60351.61 ± 0.01                       | -0.05 ± 0.04                               | -0.03 ± 0.03                                | -0.06 ± 0.07                                 | -0.02 ± 0.05                                 |
| NH <sub>4</sub> <sup>+</sup>                 |      | -35650.57 ± 0.04                       | 0.07 ± 0.12                                | -0.04 ± 0.12                                | -0.08 ± 0.30                                 | -0.25 ± 0.45                                 |
|                                              | b    | -35656.79 ± 0.01                       | 0.00 ± 0.02                                | -0.01 ± 0.02                                | -0.01 ± 0.03                                 | 0.00 ± 0.02                                  |
|                                              | ba   | -35657.95 ± 0.01                       | 0.00 ± 0.02                                | 0.00 ± 0.02                                 | -0.02 ± 0.03                                 | 0.02 ± 0.02                                  |
|                                              | bad  | -35657.95 ± 0.01                       | 0.00 ± 0.02                                | 0.00 ± 0.02                                 | -0.02 ± 0.03                                 | 0.02 ± 0.02                                  |
|                                              | badq | -35657.18 ± 0.01                       | -0.01 ± 0.02                               | 0.00 ± 0.02                                 | -0.04 ± 0.03                                 | 0.03 ± 0.03                                  |
| CH <sub>3</sub> CO <sub>2</sub> <sup>-</sup> |      | -143235.31 ± 0.07                      | 0.37 ± 0.23                                | 0.24 ± 0.25                                 | 0.07 ± 0.53                                  | 1.02 ± 0.36                                  |
|                                              | b    | -143222.40 ± 0.05                      | 0.44 ± 0.17                                | 0.35 ± 0.18                                 | 0.33 ± 0.46                                  | 0.55 ± 0.30                                  |
|                                              | ba   | -143272.32 ± 0.04                      | 0.34 ± 0.15                                | 0.27 ± 0.15                                 | 0.02 ± 0.29                                  | 0.27 ± 0.18                                  |
|                                              | bad  | -143277.15 ± 0.04                      | 0.05 ± 0.15                                | 0.00 ± 0.16                                 | -0.11 ± 0.28                                 | -0.02 ± 0.36                                 |
|                                              | badq | -143305.89 ± 0.06                      | -0.08 ± 0.17                               | -0.10 ± 0.18                                | -0.23 ± 0.38                                 | -0.16 ± 0.35                                 |
| H <sub>3</sub> O <sup>+</sup>                |      | -48062.72 ± 0.05                       | -0.22 ± 0.17                               | -0.33 ± 0.17                                | -1.00 ± 0.21                                 | -0.16 ± 0.35                                 |
|                                              | b    | -48067.54 ± 0.04                       | -0.26 ± 0.17                               | -0.30 ± 0.14                                | -0.37 ± 0.20                                 | -0.58 ± 0.26                                 |
|                                              | ba   | -48070.58 ± 0.01                       | -0.06 ± 0.04                               | -0.07 ± 0.03                                | -0.06 ± 0.05                                 | -0.07 ± 0.04                                 |

*Continued on next page*

Table 17 – *Continued from previous page*

| Molec.                          | MM'  | $\Delta G_{\text{TI3}}^{N_i=11}$ | $\Delta\Delta G_{\text{TI}}^{N_i=3}$ | $\Delta\Delta G_{\text{BAR}}^{N_i=3}$ | $\Delta\Delta G_{\text{IEXP}}^{N_i=2}$ | $\Delta\Delta G_{\text{DEXP}}^{N_i=2}$ |
|---------------------------------|------|----------------------------------|--------------------------------------|---------------------------------------|----------------------------------------|----------------------------------------|
|                                 | bad  | $-48070.58 \pm 0.01$             | $-0.06 \pm 0.04$                     | $-0.07 \pm 0.03$                      | $-0.06 \pm 0.05$                       | $-0.07 \pm 0.04$                       |
|                                 | badq | $-48070.60 \pm 0.01$             | $-0.04 \pm 0.03$                     | $-0.05 \pm 0.03$                      | $-0.07 \pm 0.05$                       | $-0.04 \pm 0.05$                       |
| $\text{C}_6\text{H}_5\text{Cl}$ |      | $-433851.87 \pm 0.03$            | $0.20 \pm 0.10$                      | $0.17 \pm 0.09$                       | $0.23 \pm 0.15$                        | $0.01 \pm 0.27$                        |
|                                 | b    | $-433850.81 \pm 0.04$            | $-0.02 \pm 0.09$                     | $0.01 \pm 0.08$                       | $-0.07 \pm 0.10$                       | $0.14 \pm 0.11$                        |
|                                 | ba   | $-433854.43 \pm 0.03$            | $-0.04 \pm 0.09$                     | $-0.01 \pm 0.08$                      | $0.07 \pm 0.10$                        | $-0.26 \pm 0.17$                       |
|                                 | bad  | $-433856.05 \pm 0.03$            | $0.08 \pm 0.09$                      | $0.07 \pm 0.07$                       | $0.13 \pm 0.11$                        | $0.09 \pm 0.11$                        |
|                                 | badq | $-433860.24 \pm 0.04$            | $-0.03 \pm 0.09$                     | $-0.01 \pm 0.08$                      | $0.13 \pm 0.15$                        | $-0.07 \pm 0.11$                       |
| $\text{C}_6\text{H}_{14}$       |      | $-148579.99 \pm 0.03$            | $-0.16 \pm 0.09$                     | $-0.15 \pm 0.08$                      | $-0.20 \pm 0.11$                       | $-0.05 \pm 0.11$                       |
|                                 | b    | $-148580.59 \pm 0.03$            | $-0.19 \pm 0.09$                     | $-0.15 \pm 0.08$                      | $-0.15 \pm 0.11$                       | $-0.08 \pm 0.11$                       |
|                                 | ba   | $-148579.49 \pm 0.03$            | $-0.11 \pm 0.09$                     | $-0.14 \pm 0.09$                      | $-0.14 \pm 0.13$                       | $-0.09 \pm 0.12$                       |
|                                 | bad  | $-148579.45 \pm 0.03$            | $-0.19 \pm 0.09$                     | $-0.19 \pm 0.07$                      | $-0.21 \pm 0.10$                       | $-0.09 \pm 0.09$                       |
|                                 | badq | $-148576.82 \pm 0.03$            | $0.09 \pm 0.09$                      | $0.11 \pm 0.09$                       | $-0.11 \pm 0.09$                       | $0.22 \pm 0.17$                        |
| $\text{CH}_3\text{OH}$          |      | $-72530.37 \pm 0.03$             | $-0.15 \pm 0.11$                     | $-0.17 \pm 0.14$                      | $-0.04 \pm 0.22$                       | $-0.15 \pm 0.22$                       |
|                                 | b    | $-72530.81 \pm 0.03$             | $-0.14 \pm 0.11$                     | $-0.15 \pm 0.11$                      | $0.05 \pm 0.20$                        | $-0.32 \pm 0.20$                       |
|                                 | ba   | $-72530.76 \pm 0.03$             | $-0.02 \pm 0.11$                     | $-0.03 \pm 0.12$                      | $-0.02 \pm 0.20$                       | $0.16 \pm 0.16$                        |
|                                 | bad  | $-72530.78 \pm 0.03$             | $0.08 \pm 0.10$                      | $0.09 \pm 0.11$                       | $0.02 \pm 0.20$                        | $0.23 \pm 0.17$                        |
|                                 | badq | $-72530.61 \pm 0.03$             | $0.33 \pm 0.10$                      | $0.26 \pm 0.10$                       | $0.35 \pm 0.23$                        | $0.19 \pm 0.17$                        |
| $\text{C}_2\text{H}_6$          |      | $-50024.16 \pm 0.02$             | $0.00 \pm 0.05$                      | $0.01 \pm 0.04$                       | $-0.03 \pm 0.07$                       | $0.05 \pm 0.06$                        |
|                                 | b    | $-50024.32 \pm 0.01$             | $-0.05 \pm 0.05$                     | $-0.05 \pm 0.04$                      | $-0.07 \pm 0.05$                       | $-0.06 \pm 0.08$                       |
|                                 | ba   | $-50024.08 \pm 0.01$             | $-0.03 \pm 0.04$                     | $-0.03 \pm 0.04$                      | $-0.07 \pm 0.05$                       | $0.02 \pm 0.05$                        |
|                                 | bad  | $-50024.17 \pm 0.01$             | $-0.03 \pm 0.04$                     | $-0.04 \pm 0.03$                      | $-0.04 \pm 0.05$                       | $-0.05 \pm 0.05$                       |
|                                 | badq | $-50024.33 \pm 0.01$             | $-0.02 \pm 0.04$                     | $-0.02 \pm 0.03$                      | $-0.04 \pm 0.05$                       | $0.01 \pm 0.04$                        |
| $(\text{CH}_2)_4\text{O}$       |      | $-145701.53 \pm 0.05$            | $0.00 \pm 0.17$                      | $-0.06 \pm 0.14$                      | $0.14 \pm 0.33$                        | $-0.33 \pm 0.29$                       |
|                                 | b    | $-145701.13 \pm 0.05$            | $-0.21 \pm 0.17$                     | $-0.14 \pm 0.16$                      | $-0.28 \pm 0.35$                       | $-0.27 \pm 0.36$                       |

*Continued on next page*

Table 17 – *Continued from previous page*

| Molec.                                        | MM'  | $\Delta G_{\text{TI3}}^{N_i=11}$ | $\Delta\Delta G_{\text{TI}}^{N_i=3}$ | $\Delta\Delta G_{\text{BAR}}^{N_i=3}$ | $\Delta\Delta G_{\text{IEXP}}^{N_i=2}$ | $\Delta\Delta G_{\text{DEXP}}^{N_i=2}$ |
|-----------------------------------------------|------|----------------------------------|--------------------------------------|---------------------------------------|----------------------------------------|----------------------------------------|
| C(NH <sub>2</sub> ) <sub>3</sub> <sup>+</sup> | ba   | -145699.24 ± 0.03                | 0.07 ± 0.11                          | 0.11 ± 0.10                           | 0.10 ± 0.31                            | 0.19 ± 0.24                            |
|                                               | bad  | -145700.24 ± 0.03                | -0.01 ± 0.12                         | -0.02 ± 0.13                          | 0.11 ± 0.21                            | -0.07 ± 0.21                           |
|                                               | badq | -145684.45 ± 0.03                | 0.08 ± 0.11                          | 0.05 ± 0.09                           | 0.14 ± 0.18                            | 0.00 ± 0.13                            |
|                                               | b    | -128902.19 ± 0.05                | 0.04 ± 0.18                          | -0.24 ± 0.18                          | -0.12 ± 0.44                           | -0.43 ± 0.29                           |
|                                               | b    | -128907.35 ± 0.05                | 0.10 ± 0.15                          | -0.06 ± 0.13                          | -0.02 ± 0.24                           | -0.12 ± 0.24                           |
|                                               | ba   | -128933.28 ± 0.04                | 0.08 ± 0.14                          | -0.04 ± 0.13                          | -0.01 ± 0.18                           | 0.05 ± 0.16                            |
| C <sub>6</sub> H <sub>5</sub> NH <sub>2</sub> | bad  | -128936.23 ± 0.04                | 0.15 ± 0.13                          | 0.02 ± 0.10                           | 0.00 ± 0.18                            | 0.15 ± 0.12                            |
|                                               | badq | -128918.95 ± 0.04                | -0.05 ± 0.14                         | -0.09 ± 0.12                          | 0.00 ± 0.21                            | -0.41 ± 0.32                           |
|                                               | b    | -180230.53 ± 0.04                | 0.09 ± 0.14                          | 0.13 ± 0.12                           | -0.15 ± 0.16                           | 0.07 ± 0.20                            |
|                                               | b    | -180230.55 ± 0.04                | 0.15 ± 0.14                          | 0.14 ± 0.13                           | 0.01 ± 0.21                            | -0.33 ± 0.28                           |
|                                               | ba   | -180233.99 ± 0.04                | -0.22 ± 0.12                         | -0.21 ± 0.11                          | -0.10 ± 0.21                           | -0.41 ± 0.16                           |
|                                               | bad  | -180233.04 ± 0.04                | 0.20 ± 0.13                          | 0.18 ± 0.12                           | 0.15 ± 0.16                            | -0.10 ± 0.17                           |
| CH <sub>3</sub> CONH <sub>2</sub>             | badq | -180262.07 ± 0.07                | 0.94 ± 0.21                          | 0.91 ± 0.24                           | 0.06 ± 0.39                            | 1.30 ± 0.31                            |
|                                               | b    | -131079.14 ± 0.05                | -0.10 ± 0.16                         | -0.12 ± 0.14                          | 0.09 ± 0.26                            | -0.15 ± 0.23                           |
|                                               | b    | -131078.83 ± 0.04                | -0.04 ± 0.13                         | -0.10 ± 0.12                          | -0.21 ± 0.22                           | 0.03 ± 0.17                            |
|                                               | ba   | -131083.77 ± 0.04                | 0.24 ± 0.13                          | 0.23 ± 0.13                           | -0.07 ± 0.18                           | 0.47 ± 0.17                            |
|                                               | bad  | -131084.84 ± 0.04                | -0.08 ± 0.13                         | -0.06 ± 0.13                          | -0.23 ± 0.22                           | -0.06 ± 0.33                           |
|                                               | badq | -131071.30 ± 0.03                | -0.11 ± 0.12                         | 0.02 ± 0.10                           | -0.19 ± 0.13                           | -0.22 ± 0.27                           |
| H <sub>2</sub> O                              | b    | -47896.99 ± 0.03                 | -0.29 ± 0.12                         | -0.27 ± 0.14                          | -0.14 ± 0.24                           | -0.28 ± 0.19                           |
|                                               | b    | -47897.87 ± 0.03                 | 0.23 ± 0.10                          | 0.17 ± 0.10                           | 0.11 ± 0.17                            | 0.32 ± 0.15                            |
|                                               | ba   | -47898.10 ± 0.03                 | 0.33 ± 0.10                          | 0.27 ± 0.10                           | 0.21 ± 0.19                            | 0.38 ± 0.15                            |
|                                               | bad  | -47898.10 ± 0.03                 | 0.33 ± 0.10                          | 0.27 ± 0.10                           | 0.21 ± 0.19                            | 0.38 ± 0.15                            |
|                                               | badq | -47897.84 ± 0.03                 | -0.02 ± 0.10                         | 0.00 ± 0.12                           | -0.08 ± 0.21                           | 0.17 ± 0.25                            |
| C <sub>2</sub> H <sub>5</sub> OH              |      | -97165.69 ± 0.04                 | 0.16 ± 0.12                          | 0.11 ± 0.13                           | -0.09 ± 0.19                           | 0.32 ± 0.16                            |

*Continued on next page*

Table 17 – *Continued from previous page*

| Molec.                          | MM'  | $\Delta G_{\text{TI3}}^{N_i=11}$ | $\Delta\Delta G_{\text{TI}}^{N_i=3}$ | $\Delta\Delta G_{\text{BAR}}^{N_i=3}$ | $\Delta\Delta G_{\text{IEXP}}^{N_i=2}$ | $\Delta\Delta G_{\text{DEXP}}^{N_i=2}$ |
|---------------------------------|------|----------------------------------|--------------------------------------|---------------------------------------|----------------------------------------|----------------------------------------|
|                                 | b    | $-97165.97 \pm 0.04$             | $-0.11 \pm 0.12$                     | $-0.11 \pm 0.12$                      | $-0.23 \pm 0.31$                       | $0.03 \pm 0.17$                        |
|                                 | ba   | $-97166.30 \pm 0.04$             | $0.10 \pm 0.12$                      | $0.14 \pm 0.12$                       | $-0.18 \pm 0.15$                       | $0.46 \pm 0.16$                        |
|                                 | bad  | $-97166.59 \pm 0.04$             | $0.01 \pm 0.13$                      | $-0.03 \pm 0.13$                      | $-0.04 \pm 0.24$                       | $-0.01 \pm 0.16$                       |
|                                 | badq | $-97165.26 \pm 0.03$             | $-0.04 \pm 0.11$                     | $-0.02 \pm 0.12$                      | $-0.11 \pm 0.23$                       | $0.10 \pm 0.14$                        |
| $\text{C}_6\text{H}_6$          |      | $-145560.94 \pm 0.02$            | $0.00 \pm 0.07$                      | $0.01 \pm 0.07$                       | $0.15 \pm 0.10$                        | $-0.04 \pm 0.11$                       |
|                                 | b    | $-145561.20 \pm 0.02$            | $0.05 \pm 0.06$                      | $0.08 \pm 0.05$                       | $0.10 \pm 0.08$                        | $0.10 \pm 0.07$                        |
|                                 | ba   | $-145564.93 \pm 0.02$            | $0.12 \pm 0.06$                      | $0.09 \pm 0.05$                       | $0.18 \pm 0.07$                        | $0.06 \pm 0.07$                        |
|                                 | bad  | $-145563.51 \pm 0.02$            | $0.01 \pm 0.07$                      | $0.02 \pm 0.07$                       | $0.10 \pm 0.13$                        | $-0.02 \pm 0.09$                       |
|                                 | badq | $-145563.88 \pm 0.02$            | $-0.05 \pm 0.06$                     | $-0.03 \pm 0.06$                      | $0.03 \pm 0.08$                        | $-0.10 \pm 0.09$                       |
| $\text{C}_6\text{H}_5\text{OH}$ |      | $-192696.13 \pm 0.03$            | $-0.23 \pm 0.13$                     | $-0.23 \pm 0.12$                      | $-0.05 \pm 0.37$                       | $-0.22 \pm 0.15$                       |
|                                 | b    | $-192696.41 \pm 0.04$            | $-0.10 \pm 0.12$                     | $-0.10 \pm 0.12$                      | $-0.20 \pm 0.26$                       | $0.19 \pm 0.16$                        |
|                                 | ba   | $-192700.83 \pm 0.03$            | $0.29 \pm 0.10$                      | $0.19 \pm 0.10$                       | $0.10 \pm 0.23$                        | $0.51 \pm 0.11$                        |
|                                 | bad  | $-192699.26 \pm 0.03$            | $-0.11 \pm 0.10$                     | $-0.17 \pm 0.10$                      | $-0.23 \pm 0.14$                       | $-0.21 \pm 0.27$                       |
|                                 | badq | $-192711.46 \pm 0.06$            | $0.58 \pm 0.20$                      | $0.44 \pm 0.23$                       | $0.55 \pm 0.54$                        | $0.62 \pm 0.38$                        |

Table 18: MM-to-QM aqueous-phase solvation free energy correction values from 6- $\lambda$  states simulated for 100 ps

| Molec.                                       | MM'  | $\Delta G_{\text{TI3}}^{N_\lambda=11}$ | $\Delta\Delta G_{\text{TI}}^{N_\lambda=6}$ | $\Delta\Delta G_{\text{BAR}}^{N_\lambda=6}$ | $\Delta\Delta G_{\text{IEXP}}^{N_\lambda=5}$ | $\Delta\Delta G_{\text{DEXP}}^{N_\lambda=5}$ |
|----------------------------------------------|------|----------------------------------------|--------------------------------------------|---------------------------------------------|----------------------------------------------|----------------------------------------------|
| CO <sub>3</sub> <sup>2-</sup>                |      | -165240.53 ± 0.11                      | -0.15 ± 0.25                               | -0.27 ± 0.23                                | -0.61 ± 0.35                                 | -0.25 ± 0.38                                 |
|                                              | b    | -165222.41 ± 0.06                      | 0.37 ± 0.13                                | 0.33 ± 0.12                                 | 0.35 ± 0.24                                  | 0.40 ± 0.17                                  |
|                                              | ba   | -165287.40 ± 0.05                      | -0.06 ± 0.12                               | -0.07 ± 0.11                                | -0.11 ± 0.16                                 | -0.04 ± 0.16                                 |
|                                              | bad  | -165339.45 ± 0.05                      | -0.13 ± 0.13                               | -0.14 ± 0.12                                | -0.07 ± 0.19                                 | -0.23 ± 0.18                                 |
|                                              | badq | -165328.69 ± 0.05                      | -0.13 ± 0.11                               | -0.13 ± 0.09                                | -0.16 ± 0.13                                 | -0.16 ± 0.13                                 |
| CH <sub>3</sub> NH <sub>3</sub> <sup>+</sup> |      | -60348.42 ± 0.04                       | -0.01 ± 0.09                               | -0.01 ± 0.08                                | -0.04 ± 0.12                                 | 0.04 ± 0.11                                  |
|                                              | b    | -60352.99 ± 0.02                       | -0.04 ± 0.04                               | -0.04 ± 0.04                                | -0.04 ± 0.05                                 | -0.04 ± 0.05                                 |
|                                              | ba   | -60355.28 ± 0.01                       | 0.04 ± 0.03                                | 0.04 ± 0.02                                 | 0.03 ± 0.03                                  | 0.05 ± 0.03                                  |
|                                              | bad  | -60355.56 ± 0.02                       | 0.03 ± 0.04                                | 0.03 ± 0.03                                 | 0.02 ± 0.04                                  | 0.05 ± 0.04                                  |
|                                              | badq | -60351.61 ± 0.01                       | 0.05 ± 0.03                                | 0.05 ± 0.02                                 | 0.04 ± 0.03                                  | 0.05 ± 0.03                                  |
| NH <sub>4</sub> <sup>+</sup>                 |      | -35650.57 ± 0.04                       | 0.05 ± 0.08                                | 0.02 ± 0.07                                 | 0.06 ± 0.13                                  | 0.00 ± 0.14                                  |
|                                              | b    | -35656.79 ± 0.01                       | -0.01 ± 0.01                               | -0.01 ± 0.01                                | -0.01 ± 0.02                                 | -0.01 ± 0.02                                 |
|                                              | ba   | -35657.95 ± 0.01                       | 0.00 ± 0.01                                | 0.00 ± 0.01                                 | -0.01 ± 0.01                                 | 0.01 ± 0.01                                  |
|                                              | bad  | -35657.95 ± 0.01                       | 0.00 ± 0.01                                | 0.00 ± 0.01                                 | -0.01 ± 0.01                                 | 0.01 ± 0.01                                  |
|                                              | badq | -35657.18 ± 0.01                       | 0.01 ± 0.01                                | 0.01 ± 0.01                                 | 0.00 ± 0.02                                  | 0.03 ± 0.02                                  |
| CH <sub>3</sub> CO <sub>2</sub> <sup>-</sup> |      | -143235.31 ± 0.07                      | 0.04 ± 0.17                                | 0.03 ± 0.15                                 | 0.05 ± 0.26                                  | -0.02 ± 0.25                                 |
|                                              | b    | -143222.40 ± 0.05                      | 0.08 ± 0.11                                | 0.08 ± 0.10                                 | -0.01 ± 0.16                                 | 0.18 ± 0.14                                  |
|                                              | ba   | -143272.32 ± 0.04                      | -0.10 ± 0.10                               | -0.11 ± 0.10                                | -0.12 ± 0.14                                 | -0.10 ± 0.15                                 |
|                                              | bad  | -143277.15 ± 0.04                      | 0.04 ± 0.09                                | 0.04 ± 0.09                                 | -0.11 ± 0.13                                 | 0.15 ± 0.13                                  |
|                                              | badq | -143305.89 ± 0.06                      | -0.27 ± 0.13                               | -0.26 ± 0.12                                | -0.28 ± 0.18                                 | -0.22 ± 0.17                                 |
| H <sub>3</sub> O <sup>+</sup>                |      | -48062.72 ± 0.05                       | -0.08 ± 0.12                               | -0.08 ± 0.12                                | -0.21 ± 0.16                                 | -0.15 ± 0.19                                 |
|                                              | b    | -48067.54 ± 0.04                       | -0.13 ± 0.10                               | -0.14 ± 0.08                                | -0.26 ± 0.12                                 | -0.05 ± 0.12                                 |
|                                              | ba   | -48070.58 ± 0.01                       | 0.01 ± 0.02                                | 0.01 ± 0.02                                 | 0.01 ± 0.03                                  | 0.00 ± 0.03                                  |

*Continued on next page*

Table 18 – *Continued from previous page*

| Molec.                          | MM'  | $\Delta G_{\text{TI3}}^{N_i=11}$ | $\Delta\Delta G_{\text{TI}}^{N_i=6}$ | $\Delta\Delta G_{\text{BAR}}^{N_i=6}$ | $\Delta\Delta G_{\text{IEXP}}^{N_i=5}$ | $\Delta\Delta G_{\text{DEXP}}^{N_i=5}$ |
|---------------------------------|------|----------------------------------|--------------------------------------|---------------------------------------|----------------------------------------|----------------------------------------|
|                                 | bad  | $-48070.58 \pm 0.01$             | $0.01 \pm 0.02$                      | $0.01 \pm 0.02$                       | $0.01 \pm 0.03$                        | $0.00 \pm 0.03$                        |
|                                 | badq | $-48070.60 \pm 0.01$             | $-0.02 \pm 0.02$                     | $-0.02 \pm 0.02$                      | $-0.03 \pm 0.03$                       | $-0.02 \pm 0.02$                       |
| $\text{C}_6\text{H}_5\text{Cl}$ |      | $-433851.87 \pm 0.03$            | $0.13 \pm 0.07$                      | $0.13 \pm 0.06$                       | $0.18 \pm 0.09$                        | $0.10 \pm 0.09$                        |
|                                 | b    | $-433850.81 \pm 0.04$            | $0.03 \pm 0.06$                      | $0.03 \pm 0.06$                       | $0.02 \pm 0.08$                        | $0.05 \pm 0.08$                        |
|                                 | ba   | $-433854.43 \pm 0.03$            | $0.04 \pm 0.06$                      | $0.04 \pm 0.06$                       | $0.05 \pm 0.07$                        | $0.02 \pm 0.08$                        |
|                                 | bad  | $-433856.05 \pm 0.03$            | $0.00 \pm 0.06$                      | $0.00 \pm 0.05$                       | $-0.01 \pm 0.07$                       | $0.02 \pm 0.07$                        |
|                                 | badq | $-433860.24 \pm 0.04$            | $0.02 \pm 0.06$                      | $0.03 \pm 0.06$                       | $0.05 \pm 0.07$                        | $0.01 \pm 0.07$                        |
| $\text{C}_6\text{H}_{14}$       |      | $-148579.99 \pm 0.03$            | $-0.01 \pm 0.07$                     | $-0.02 \pm 0.05$                      | $-0.01 \pm 0.07$                       | $-0.03 \pm 0.08$                       |
|                                 | b    | $-148580.59 \pm 0.03$            | $-0.02 \pm 0.07$                     | $-0.02 \pm 0.06$                      | $0.00 \pm 0.09$                        | $-0.03 \pm 0.08$                       |
|                                 | ba   | $-148579.49 \pm 0.03$            | $-0.08 \pm 0.06$                     | $-0.08 \pm 0.05$                      | $-0.11 \pm 0.07$                       | $-0.09 \pm 0.09$                       |
|                                 | bad  | $-148579.45 \pm 0.03$            | $-0.09 \pm 0.07$                     | $-0.09 \pm 0.05$                      | $-0.08 \pm 0.07$                       | $-0.13 \pm 0.08$                       |
|                                 | badq | $-148576.82 \pm 0.03$            | $-0.14 \pm 0.07$                     | $-0.12 \pm 0.05$                      | $-0.17 \pm 0.07$                       | $-0.05 \pm 0.07$                       |
| $\text{CH}_3\text{OH}$          |      | $-72530.37 \pm 0.03$             | $0.09 \pm 0.08$                      | $0.08 \pm 0.08$                       | $0.10 \pm 0.11$                        | $0.05 \pm 0.11$                        |
|                                 | b    | $-72530.81 \pm 0.03$             | $0.03 \pm 0.08$                      | $0.03 \pm 0.07$                       | $0.04 \pm 0.10$                        | $0.01 \pm 0.10$                        |
|                                 | ba   | $-72530.76 \pm 0.03$             | $-0.17 \pm 0.09$                     | $-0.16 \pm 0.08$                      | $-0.11 \pm 0.13$                       | $-0.17 \pm 0.11$                       |
|                                 | bad  | $-72530.78 \pm 0.03$             | $0.07 \pm 0.08$                      | $0.08 \pm 0.07$                       | $0.06 \pm 0.10$                        | $0.11 \pm 0.09$                        |
|                                 | badq | $-72530.61 \pm 0.03$             | $-0.06 \pm 0.08$                     | $-0.06 \pm 0.07$                      | $0.00 \pm 0.11$                        | $-0.07 \pm 0.09$                       |
| $\text{C}_2\text{H}_6$          |      | $-50024.16 \pm 0.02$             | $0.02 \pm 0.04$                      | $0.03 \pm 0.04$                       | $0.01 \pm 0.04$                        | $0.05 \pm 0.04$                        |
|                                 | b    | $-50024.32 \pm 0.01$             | $-0.01 \pm 0.03$                     | $-0.01 \pm 0.03$                      | $-0.02 \pm 0.04$                       | $0.00 \pm 0.04$                        |
|                                 | ba   | $-50024.08 \pm 0.01$             | $-0.04 \pm 0.03$                     | $-0.04 \pm 0.02$                      | $-0.05 \pm 0.04$                       | $-0.02 \pm 0.03$                       |
|                                 | bad  | $-50024.17 \pm 0.01$             | $-0.03 \pm 0.03$                     | $-0.03 \pm 0.02$                      | $-0.02 \pm 0.03$                       | $-0.04 \pm 0.03$                       |
|                                 | badq | $-50024.33 \pm 0.01$             | $-0.03 \pm 0.02$                     | $-0.03 \pm 0.02$                      | $-0.04 \pm 0.03$                       | $-0.01 \pm 0.02$                       |
| $(\text{CH}_2)_4\text{O}$       |      | $-145701.53 \pm 0.05$            | $0.06 \pm 0.10$                      | $0.05 \pm 0.09$                       | $0.02 \pm 0.12$                        | $0.07 \pm 0.12$                        |
|                                 | b    | $-145701.13 \pm 0.05$            | $-0.04 \pm 0.11$                     | $-0.05 \pm 0.09$                      | $-0.01 \pm 0.16$                       | $-0.06 \pm 0.13$                       |

*Continued on next page*



Table 18 – *Continued from previous page*

| Molec.                            | MM'  | $\Delta G_{\text{TI3}}^{N_i=11}$ | $\Delta\Delta G_{\text{TI}}^{N_i=6}$ | $\Delta\Delta G_{\text{BAR}}^{N_i=6}$ | $\Delta\Delta G_{\text{IEXP}}^{N_i=5}$ | $\Delta\Delta G_{\text{DEXP}}^{N_i=5}$ |
|-----------------------------------|------|----------------------------------|--------------------------------------|---------------------------------------|----------------------------------------|----------------------------------------|
|                                   | ba   | -145699.24 ± 0.03                | 0.12 ± 0.08                          | 0.14 ± 0.08                           | 0.08 ± 0.12                            | 0.22 ± 0.10                            |
|                                   | bad  | -145700.24 ± 0.03                | 0.18 ± 0.09                          | 0.17 ± 0.08                           | 0.25 ± 0.12                            | 0.13 ± 0.10                            |
|                                   | badq | -145684.45 ± 0.03                | 0.01 ± 0.08                          | 0.01 ± 0.07                           | 0.08 ± 0.10                            | -0.02 ± 0.10                           |
| $\text{C}(\text{NH}_2)_3^+$       |      | -128902.19 ± 0.05                | -0.01 ± 0.12                         | -0.02 ± 0.10                          | -0.12 ± 0.17                           | -0.10 ± 0.16                           |
|                                   | b    | -128907.35 ± 0.05                | -0.24 ± 0.10                         | -0.25 ± 0.09                          | -0.19 ± 0.15                           | -0.28 ± 0.11                           |
|                                   | ba   | -128933.28 ± 0.04                | -0.11 ± 0.09                         | -0.14 ± 0.08                          | -0.07 ± 0.16                           | -0.13 ± 0.09                           |
|                                   | bad  | -128936.23 ± 0.04                | -0.05 ± 0.08                         | -0.07 ± 0.07                          | -0.17 ± 0.10                           | 0.00 ± 0.10                            |
|                                   | badq | -128918.95 ± 0.04                | -0.25 ± 0.09                         | -0.27 ± 0.08                          | -0.28 ± 0.11                           | -0.26 ± 0.11                           |
| $\text{C}_6\text{H}_5\text{NH}_2$ |      | -180230.53 ± 0.04                | 0.14 ± 0.10                          | 0.13 ± 0.09                           | 0.14 ± 0.13                            | 0.10 ± 0.14                            |
|                                   | b    | -180230.55 ± 0.04                | -0.05 ± 0.09                         | -0.04 ± 0.08                          | -0.01 ± 0.12                           | -0.13 ± 0.12                           |
|                                   | ba   | -180233.99 ± 0.04                | 0.00 ± 0.09                          | 0.01 ± 0.07                           | 0.10 ± 0.12                            | -0.13 ± 0.11                           |
|                                   | bad  | -180233.04 ± 0.04                | 0.11 ± 0.08                          | 0.12 ± 0.08                           | 0.13 ± 0.11                            | 0.03 ± 0.12                            |
|                                   | badq | -180262.07 ± 0.07                | 0.32 ± 0.16                          | 0.33 ± 0.17                           | 0.39 ± 0.26                            | 0.17 ± 0.29                            |
| $\text{CH}_3\text{CONH}_2$        |      | -131079.14 ± 0.05                | 0.10 ± 0.11                          | 0.08 ± 0.09                           | 0.18 ± 0.17                            | -0.03 ± 0.16                           |
|                                   | b    | -131078.83 ± 0.04                | 0.02 ± 0.10                          | 0.00 ± 0.09                           | 0.02 ± 0.13                            | -0.06 ± 0.13                           |
|                                   | ba   | -131083.77 ± 0.04                | 0.08 ± 0.09                          | 0.09 ± 0.08                           | -0.04 ± 0.11                           | 0.19 ± 0.13                            |
|                                   | bad  | -131084.84 ± 0.04                | -0.06 ± 0.09                         | -0.05 ± 0.09                          | -0.08 ± 0.13                           | -0.03 ± 0.14                           |
|                                   | badq | -131071.30 ± 0.03                | 0.02 ± 0.07                          | 0.03 ± 0.07                           | -0.05 ± 0.10                           | 0.13 ± 0.09                            |
| $\text{H}_2\text{O}$              |      | -47896.99 ± 0.03                 | 0.09 ± 0.08                          | 0.07 ± 0.08                           | 0.09 ± 0.12                            | 0.05 ± 0.12                            |
|                                   | b    | -47897.87 ± 0.03                 | -0.02 ± 0.08                         | -0.01 ± 0.07                          | 0.00 ± 0.09                            | -0.02 ± 0.09                           |
|                                   | ba   | -47898.10 ± 0.03                 | 0.08 ± 0.08                          | 0.08 ± 0.09                           | 0.05 ± 0.11                            | 0.11 ± 0.11                            |
|                                   | bad  | -47898.10 ± 0.03                 | 0.08 ± 0.08                          | 0.08 ± 0.09                           | 0.05 ± 0.11                            | 0.11 ± 0.11                            |
|                                   | badq | -47897.84 ± 0.03                 | -0.17 ± 0.08                         | -0.15 ± 0.08                          | -0.18 ± 0.11                           | -0.14 ± 0.11                           |
| $\text{C}_2\text{H}_5\text{OH}$   |      | -97165.69 ± 0.04                 | -0.18 ± 0.08                         | -0.17 ± 0.08                          | -0.25 ± 0.12                           | -0.10 ± 0.11                           |

*Continued on next page*

Table 18 – *Continued from previous page*

| Molec.                          | MM'  | $\Delta G_{\text{TI3}}^{N_i=11}$ | $\Delta\Delta G_{\text{TI}}^{N_i=6}$ | $\Delta\Delta G_{\text{BAR}}^{N_i=6}$ | $\Delta\Delta G_{\text{IEXP}}^{N_i=5}$ | $\Delta\Delta G_{\text{DEXP}}^{N_i=5}$ |
|---------------------------------|------|----------------------------------|--------------------------------------|---------------------------------------|----------------------------------------|----------------------------------------|
|                                 | b    | $-97165.97 \pm 0.04$             | $0.04 \pm 0.08$                      | $0.04 \pm 0.09$                       | $-0.01 \pm 0.14$                       | $0.09 \pm 0.12$                        |
|                                 | ba   | $-97166.30 \pm 0.04$             | $-0.03 \pm 0.09$                     | $0.00 \pm 0.08$                       | $-0.02 \pm 0.16$                       | $0.05 \pm 0.12$                        |
|                                 | bad  | $-97166.59 \pm 0.04$             | $-0.10 \pm 0.08$                     | $-0.10 \pm 0.08$                      | $-0.10 \pm 0.16$                       | $-0.07 \pm 0.11$                       |
|                                 | badq | $-97165.26 \pm 0.03$             | $0.27 \pm 0.08$                      | $0.25 \pm 0.07$                       | $0.23 \pm 0.10$                        | $0.26 \pm 0.10$                        |
| $\text{C}_6\text{H}_6$          |      | $-145560.94 \pm 0.02$            | $0.05 \pm 0.05$                      | $0.05 \pm 0.04$                       | $0.09 \pm 0.06$                        | $0.01 \pm 0.07$                        |
|                                 | b    | $-145561.20 \pm 0.02$            | $-0.01 \pm 0.04$                     | $0.01 \pm 0.04$                       | $0.04 \pm 0.05$                        | $-0.02 \pm 0.05$                       |
|                                 | ba   | $-145564.93 \pm 0.02$            | $0.00 \pm 0.04$                      | $0.00 \pm 0.04$                       | $0.05 \pm 0.06$                        | $-0.05 \pm 0.06$                       |
|                                 | bad  | $-145563.51 \pm 0.02$            | $-0.06 \pm 0.04$                     | $-0.05 \pm 0.04$                      | $-0.05 \pm 0.05$                       | $-0.06 \pm 0.05$                       |
|                                 | badq | $-145563.88 \pm 0.02$            | $-0.05 \pm 0.04$                     | $-0.05 \pm 0.04$                      | $-0.02 \pm 0.05$                       | $-0.08 \pm 0.05$                       |
| $\text{C}_6\text{H}_5\text{OH}$ |      | $-192696.13 \pm 0.03$            | $0.09 \pm 0.08$                      | $0.07 \pm 0.08$                       | $0.05 \pm 0.11$                        | $0.10 \pm 0.09$                        |
|                                 | b    | $-192696.41 \pm 0.04$            | $0.02 \pm 0.08$                      | $0.01 \pm 0.08$                       | $-0.03 \pm 0.13$                       | $0.09 \pm 0.11$                        |
|                                 | ba   | $-192700.83 \pm 0.03$            | $0.16 \pm 0.08$                      | $0.14 \pm 0.07$                       | $0.10 \pm 0.10$                        | $0.21 \pm 0.09$                        |
|                                 | bad  | $-192699.26 \pm 0.03$            | $-0.04 \pm 0.08$                     | $-0.06 \pm 0.07$                      | $-0.08 \pm 0.09$                       | $-0.02 \pm 0.09$                       |
|                                 | badq | $-192711.46 \pm 0.06$            | $-0.30 \pm 0.14$                     | $-0.25 \pm 0.14$                      | $-0.28 \pm 0.23$                       | $-0.36 \pm 0.22$                       |

Table 19: MM-to-QM aqueous-phase solvation free energy correction values from 2- $\lambda$  states simulated for 50 ps

| Molec.                                       | MM'  | $\Delta G_{\text{TI3}}^{N_\lambda=11}$ | $\Delta\Delta G_{\text{TI}}^{N_\lambda=2}$ | $\Delta\Delta G_{\text{BAR}}^{N_\lambda=2}$ | $\Delta\Delta G_{\text{IEXP}}^{N_\lambda=1}$ | $\Delta\Delta G_{\text{DEXP}}^{N_\lambda=1}$ |
|----------------------------------------------|------|----------------------------------------|--------------------------------------------|---------------------------------------------|----------------------------------------------|----------------------------------------------|
| CO <sub>3</sub> <sup>2-</sup>                |      | -165240.53 ± 0.11                      | 3.59 ± 0.66                                | 0.03 ± 0.53                                 | -10.12 ± 0.43                                | 10.17 ± 0.34                                 |
|                                              | b    | -165222.41 ± 0.06                      | 1.87 ± 0.36                                | 0.35 ± 0.44                                 | -1.99 ± 0.26                                 | 2.57 ± 0.39                                  |
|                                              | ba   | -165287.40 ± 0.05                      | 1.53 ± 0.25                                | 1.07 ± 0.43                                 | -1.80 ± 0.25                                 | 3.89 ± 0.37                                  |
|                                              | bad  | -165339.45 ± 0.05                      | 1.11 ± 0.26                                | 0.58 ± 0.40                                 | -1.74 ± 0.25                                 | 2.83 ± 0.34                                  |
|                                              | badq | -165328.69 ± 0.05                      | 0.38 ± 0.30                                | -0.38 ± 0.37                                | -1.45 ± 0.23                                 | -0.19 ± 0.47                                 |
| CH <sub>3</sub> NH <sub>3</sub> <sup>+</sup> |      | -60348.42 ± 0.04                       | 0.18 ± 0.19                                | -0.11 ± 0.24                                | -0.51 ± 0.28                                 | 0.16 ± 0.40                                  |
|                                              | b    | -60352.99 ± 0.02                       | -0.01 ± 0.10                               | -0.06 ± 0.10                                | 0.51 ± 0.39                                  | -0.07 ± 0.16                                 |
|                                              | ba   | -60355.28 ± 0.01                       | 0.05 ± 0.08                                | 0.00 ± 0.07                                 | 0.19 ± 0.17                                  | -0.04 ± 0.09                                 |
|                                              | bad  | -60355.56 ± 0.02                       | -0.04 ± 0.08                               | -0.07 ± 0.07                                | 0.19 ± 0.18                                  | -0.26 ± 0.15                                 |
|                                              | badq | -60351.61 ± 0.01                       | 0.06 ± 0.06                                | 0.04 ± 0.07                                 | 0.15 ± 0.18                                  | 0.08 ± 0.09                                  |
| NH <sub>4</sub> <sup>+</sup>                 |      | -35650.57 ± 0.04                       | 0.56 ± 0.20                                | 0.12 ± 0.25                                 | -0.49 ± 0.34                                 | -0.01 ± 0.36                                 |
|                                              | b    | -35656.79 ± 0.01                       | 0.01 ± 0.03                                | 0.00 ± 0.04                                 | -0.04 ± 0.04                                 | 0.04 ± 0.06                                  |
|                                              | ba   | -35657.95 ± 0.01                       | -0.06 ± 0.03                               | -0.06 ± 0.04                                | -0.04 ± 0.04                                 | -0.07 ± 0.05                                 |
|                                              | bad  | -35657.95 ± 0.01                       | -0.06 ± 0.03                               | -0.06 ± 0.04                                | -0.04 ± 0.04                                 | -0.07 ± 0.05                                 |
|                                              | badq | -35657.18 ± 0.01                       | -0.05 ± 0.03                               | -0.05 ± 0.04                                | -0.07 ± 0.06                                 | -0.04 ± 0.05                                 |
| CH <sub>3</sub> CO <sub>2</sub> <sup>-</sup> |      | -143235.31 ± 0.07                      | 0.29 ± 0.46                                | 0.52 ± 0.59                                 | -1.36 ± 0.53                                 | 2.67 ± 0.41                                  |
|                                              | b    | -143222.40 ± 0.05                      | 1.13 ± 0.31                                | -0.07 ± 0.50                                | -0.73 ± 0.47                                 | 0.81 ± 0.54                                  |
|                                              | ba   | -143272.32 ± 0.04                      | 0.44 ± 0.19                                | 0.39 ± 0.27                                 | -0.82 ± 0.22                                 | 1.76 ± 0.19                                  |
|                                              | bad  | -143277.15 ± 0.04                      | 0.15 ± 0.19                                | 0.00 ± 0.38                                 | -0.98 ± 0.41                                 | 0.49 ± 0.46                                  |
|                                              | badq | -143305.89 ± 0.06                      | 0.53 ± 0.24                                | 0.66 ± 0.45                                 | -2.05 ± 0.37                                 | 3.37 ± 0.31                                  |
| H <sub>3</sub> O <sup>+</sup>                |      | -48062.72 ± 0.05                       | 0.38 ± 0.29                                | 0.20 ± 0.51                                 | -0.99 ± 0.56                                 | 2.06 ± 0.25                                  |
|                                              | b    | -48067.54 ± 0.04                       | 0.28 ± 0.20                                | 0.19 ± 0.43                                 | -0.89 ± 0.40                                 | 1.25 ± 0.31                                  |
|                                              | ba   | -48070.58 ± 0.01                       | 0.02 ± 0.05                                | 0.01 ± 0.06                                 | -0.07 ± 0.08                                 | 0.01 ± 0.08                                  |

*Continued on next page*

Table 19 – *Continued from previous page*

| Molec.                           | MM'  | $\Delta G_{\text{TI3}}^{N_i=11}$ | $\Delta \Delta G_{\text{TI}}^{N_i=2}$ | $\Delta \Delta G_{\text{BAR}}^{N_i=2}$ | $\Delta \Delta G_{\text{IEXP}}^{N_i=1}$ | $\Delta \Delta G_{\text{DEXP}}^{N_i=1}$ |
|----------------------------------|------|----------------------------------|---------------------------------------|----------------------------------------|-----------------------------------------|-----------------------------------------|
| C <sub>6</sub> H <sub>5</sub> Cl | bad  | -48070.58 ± 0.01                 | 0.02 ± 0.05                           | 0.01 ± 0.06                            | -0.07 ± 0.08                            | 0.01 ± 0.08                             |
|                                  | badq | -48070.60 ± 0.01                 | 0.05 ± 0.05                           | 0.05 ± 0.06                            | -0.07 ± 0.07                            | 0.11 ± 0.07                             |
|                                  |      | -433851.87 ± 0.03                | 0.20 ± 0.16                           | 0.24 ± 0.20                            | -0.11 ± 0.24                            | 0.39 ± 0.25                             |
|                                  | b    | -433850.81 ± 0.04                | 0.21 ± 0.15                           | 0.10 ± 0.16                            | 0.32 ± 0.38                             | 0.29 ± 0.16                             |
|                                  | ba   | -433854.43 ± 0.03                | 0.10 ± 0.12                           | 0.09 ± 0.11                            | 0.38 ± 0.32                             | 0.02 ± 0.24                             |
|                                  | bad  | -433856.05 ± 0.03                | -0.01 ± 0.12                          | -0.03 ± 0.11                           | 0.37 ± 0.32                             | -0.19 ± 0.23                            |
| C <sub>6</sub> H <sub>14</sub>   | badq | -433860.24 ± 0.04                | 0.03 ± 0.13                           | 0.06 ± 0.12                            | 0.30 ± 0.19                             | -0.06 ± 0.28                            |
|                                  |      | -148579.99 ± 0.03                | -0.02 ± 0.13                          | 0.00 ± 0.14                            | -0.39 ± 0.18                            | -0.49 ± 0.52                            |
|                                  | b    | -148580.59 ± 0.03                | 0.29 ± 0.14                           | 0.20 ± 0.13                            | -0.08 ± 0.15                            | -0.22 ± 0.33                            |
|                                  | ba   | -148579.49 ± 0.03                | 0.10 ± 0.13                           | 0.06 ± 0.14                            | -0.12 ± 0.17                            | 0.22 ± 0.16                             |
|                                  | bad  | -148579.45 ± 0.03                | 0.03 ± 0.12                           | 0.06 ± 0.13                            | -0.02 ± 0.16                            | 0.09 ± 0.22                             |
|                                  | badq | -148576.82 ± 0.03                | -0.10 ± 0.13                          | -0.10 ± 0.16                           | -0.28 ± 0.28                            | 0.03 ± 0.23                             |
| CH <sub>3</sub> OH               |      | -72530.37 ± 0.03                 | 0.02 ± 0.17                           | -0.18 ± 0.21                           | -0.47 ± 0.39                            | -0.40 ± 0.48                            |
|                                  | b    | -72530.81 ± 0.03                 | -0.17 ± 0.15                          | -0.23 ± 0.19                           | -0.65 ± 0.28                            | 0.07 ± 0.32                             |
|                                  | ba   | -72530.76 ± 0.03                 | -0.09 ± 0.15                          | -0.22 ± 0.20                           | -0.66 ± 0.28                            | 0.47 ± 0.24                             |
|                                  | bad  | -72530.78 ± 0.03                 | 0.14 ± 0.14                           | 0.09 ± 0.21                            | -0.71 ± 0.25                            | 0.67 ± 0.33                             |
|                                  | badq | -72530.61 ± 0.03                 | -0.08 ± 0.16                          | -0.05 ± 0.18                           | -0.48 ± 0.22                            | -0.81 ± 0.43                            |
|                                  |      | -50024.16 ± 0.02                 | -0.06 ± 0.09                          | -0.02 ± 0.08                           | -0.03 ± 0.12                            | 0.03 ± 0.10                             |
| C <sub>2</sub> H <sub>6</sub>    | b    | -50024.32 ± 0.01                 | -0.14 ± 0.07                          | -0.16 ± 0.08                           | -0.29 ± 0.12                            | -0.14 ± 0.15                            |
|                                  | ba   | -50024.08 ± 0.01                 | -0.06 ± 0.07                          | -0.07 ± 0.07                           | -0.10 ± 0.09                            | -0.06 ± 0.10                            |
|                                  | bad  | -50024.17 ± 0.01                 | -0.08 ± 0.07                          | -0.08 ± 0.07                           | -0.09 ± 0.10                            | -0.07 ± 0.09                            |
|                                  | badq | -50024.33 ± 0.01                 | -0.06 ± 0.07                          | -0.06 ± 0.07                           | -0.09 ± 0.10                            | -0.16 ± 0.17                            |
|                                  |      | -145701.53 ± 0.05                | -0.10 ± 0.25                          | 0.10 ± 0.36                            | -0.41 ± 0.44                            | 1.11 ± 0.31                             |
|                                  | b    | -145701.13 ± 0.05                | 0.22 ± 0.26                           | 0.07 ± 0.38                            | -1.34 ± 0.33                            | 1.15 ± 0.27                             |

*Continued on next page*

Table 19 – *Continued from previous page*

| Molec.                            | MM'  | $\Delta G_{\text{TI3}}^{N_i=11}$ | $\Delta \Delta G_{\text{TI}}^{N_i=2}$ | $\Delta \Delta G_{\text{BAR}}^{N_i=2}$ | $\Delta \Delta G_{\text{IEXP}}^{N_i=1}$ | $\Delta \Delta G_{\text{DEXP}}^{N_i=1}$ |
|-----------------------------------|------|----------------------------------|---------------------------------------|----------------------------------------|-----------------------------------------|-----------------------------------------|
|                                   | ba   | -145699.24 ± 0.03                | -0.03 ± 0.17                          | 0.12 ± 0.30                            | -0.49 ± 0.38                            | 0.95 ± 0.32                             |
|                                   | bad  | -145700.24 ± 0.03                | -0.54 ± 0.19                          | -0.61 ± 0.30                           | -0.46 ± 0.45                            | -0.73 ± 0.25                            |
|                                   | badq | -145684.45 ± 0.03                | -0.03 ± 0.16                          | 0.00 ± 0.21                            | -0.22 ± 0.30                            | 0.14 ± 0.25                             |
| $\text{C}(\text{NH}_2)_3^+$       |      | -128902.19 ± 0.05                | 2.23 ± 0.57                           | 0.36 ± 0.44                            | -1.08 ± 0.45                            | 1.60 ± 0.28                             |
|                                   | b    | -128907.35 ± 0.05                | 1.27 ± 0.29                           | 0.16 ± 0.30                            | -0.40 ± 0.32                            | 0.79 ± 0.36                             |
|                                   | ba   | -128933.28 ± 0.04                | 0.71 ± 0.29                           | -0.07 ± 0.21                           | -0.86 ± 0.15                            | 0.33 ± 0.33                             |
|                                   | bad  | -128936.23 ± 0.04                | 0.28 ± 0.19                           | -0.10 ± 0.17                           | -0.70 ± 0.14                            | 0.13 ± 0.23                             |
|                                   | badq | -128918.95 ± 0.04                | 0.55 ± 0.20                           | 0.12 ± 0.22                            | -0.87 ± 0.18                            | 0.97 ± 0.21                             |
| $\text{C}_6\text{H}_5\text{NH}_2$ |      | -180230.53 ± 0.04                | 0.26 ± 0.21                           | 0.41 ± 0.36                            | 0.66 ± 0.52                             | 1.05 ± 0.38                             |
|                                   | b    | -180230.55 ± 0.04                | 0.19 ± 0.20                           | 0.25 ± 0.32                            | -0.06 ± 0.47                            | 0.89 ± 0.26                             |
|                                   | ba   | -180233.99 ± 0.04                | 0.11 ± 0.19                           | -0.08 ± 0.23                           | -0.43 ± 0.37                            | 0.39 ± 0.33                             |
|                                   | bad  | -180233.04 ± 0.04                | 0.14 ± 0.19                           | -0.05 ± 0.24                           | -0.29 ± 0.38                            | 0.07 ± 0.28                             |
|                                   | badq | -180262.07 ± 0.07                | -0.83 ± 0.35                          | -0.64 ± 0.49                           | -3.96 ± 0.35                            | 2.65 ± 0.37                             |
| $\text{CH}_3\text{CONH}_2$        |      | -131079.14 ± 0.05                | -0.10 ± 0.25                          | -0.11 ± 0.54                           | 0.02 ± 0.52                             | 1.01 ± 0.40                             |
|                                   | b    | -131078.83 ± 0.04                | -0.22 ± 0.23                          | 0.01 ± 0.37                            | 1.06 ± 0.35                             | 1.32 ± 0.25                             |
|                                   | ba   | -131083.77 ± 0.04                | 0.06 ± 0.23                           | 0.34 ± 0.48                            | 0.57 ± 0.56                             | -0.39 ± 0.57                            |
|                                   | bad  | -131084.84 ± 0.04                | -0.40 ± 0.24                          | -0.39 ± 0.46                           | 0.57 ± 0.56                             | -0.48 ± 0.38                            |
|                                   | badq | -131071.30 ± 0.03                | 0.30 ± 0.17                           | 0.54 ± 0.31                            | 0.24 ± 0.21                             | 1.60 ± 0.31                             |
| $\text{H}_2\text{O}$              |      | -47896.99 ± 0.03                 | -0.13 ± 0.17                          | -0.34 ± 0.30                           | -0.72 ± 0.24                            | -0.07 ± 0.36                            |
|                                   | b    | -47897.87 ± 0.03                 | 0.32 ± 0.14                           | 0.16 ± 0.31                            | -0.76 ± 0.24                            | 0.97 ± 0.36                             |
|                                   | ba   | -47898.10 ± 0.03                 | 0.40 ± 0.13                           | 0.20 ± 0.29                            | -0.78 ± 0.32                            | 0.98 ± 0.28                             |
|                                   | bad  | -47898.10 ± 0.03                 | 0.40 ± 0.13                           | 0.20 ± 0.29                            | -0.78 ± 0.32                            | 0.98 ± 0.28                             |
|                                   | badq | -47897.84 ± 0.03                 | 0.03 ± 0.13                           | -0.06 ± 0.34                           | -0.80 ± 0.30                            | 0.31 ± 0.45                             |
| $\text{C}_2\text{H}_5\text{OH}$   |      | -97165.69 ± 0.04                 | -0.03 ± 0.18                          | -0.05 ± 0.26                           | -0.68 ± 0.26                            | -1.20 ± 0.39                            |

*Continued on next page*

Table 19 – *Continued from previous page*

| Molec.                          | MM'  | $\Delta G_{\text{TI3}}^{N_{\lambda}=11}$ | $\Delta\Delta G_{\text{TI}}^{N_{\lambda}=2}$ | $\Delta\Delta G_{\text{BAR}}^{N_{\lambda}=2}$ | $\Delta\Delta G_{\text{IEXP}}^{N_{\lambda}=1}$ | $\Delta\Delta G_{\text{DEXP}}^{N_{\lambda}=1}$ |
|---------------------------------|------|------------------------------------------|----------------------------------------------|-----------------------------------------------|------------------------------------------------|------------------------------------------------|
|                                 | b    | $-97165.97 \pm 0.04$                     | $-0.28 \pm 0.16$                             | $-0.19 \pm 0.17$                              | $-0.90 \pm 0.22$                               | $0.53 \pm 0.25$                                |
|                                 | ba   | $-97166.30 \pm 0.04$                     | $0.20 \pm 0.18$                              | $-0.08 \pm 0.26$                              | $-0.92 \pm 0.15$                               | $-0.36 \pm 0.49$                               |
|                                 | bad  | $-97166.59 \pm 0.04$                     | $0.21 \pm 0.17$                              | $0.03 \pm 0.25$                               | $-0.93 \pm 0.15$                               | $0.36 \pm 0.43$                                |
|                                 | badq | $-97165.26 \pm 0.03$                     | $0.37 \pm 0.16$                              | $0.47 \pm 0.21$                               | $-0.31 \pm 0.18$                               | $0.52 \pm 0.39$                                |
| $\text{C}_6\text{H}_6$          |      | $-145560.94 \pm 0.02$                    | $0.07 \pm 0.11$                              | $0.04 \pm 0.12$                               | $0.19 \pm 0.30$                                | $0.20 \pm 0.12$                                |
|                                 | b    | $-145561.20 \pm 0.02$                    | $0.13 \pm 0.09$                              | $0.12 \pm 0.10$                               | $0.01 \pm 0.12$                                | $0.25 \pm 0.12$                                |
|                                 | ba   | $-145564.93 \pm 0.02$                    | $0.25 \pm 0.11$                              | $0.18 \pm 0.11$                               | $0.15 \pm 0.14$                                | $-0.24 \pm 0.37$                               |
|                                 | bad  | $-145563.51 \pm 0.02$                    | $0.16 \pm 0.10$                              | $0.12 \pm 0.09$                               | $0.09 \pm 0.14$                                | $-0.13 \pm 0.21$                               |
|                                 | badq | $-145563.88 \pm 0.02$                    | $0.00 \pm 0.08$                              | $0.00 \pm 0.08$                               | $0.00 \pm 0.12$                                | $0.08 \pm 0.11$                                |
| $\text{C}_6\text{H}_5\text{OH}$ |      | $-192696.13 \pm 0.03$                    | $0.20 \pm 0.19$                              | $0.23 \pm 0.29$                               | $-0.36 \pm 0.36$                               | $0.75 \pm 0.33$                                |
|                                 | b    | $-192696.41 \pm 0.04$                    | $-0.41 \pm 0.19$                             | $-0.35 \pm 0.24$                              | $-0.52 \pm 0.27$                               | $-0.25 \pm 0.27$                               |
|                                 | ba   | $-192700.83 \pm 0.03$                    | $0.19 \pm 0.18$                              | $0.15 \pm 0.24$                               | $-0.61 \pm 0.24$                               | $0.46 \pm 0.32$                                |
|                                 | bad  | $-192699.26 \pm 0.03$                    | $0.06 \pm 0.18$                              | $-0.06 \pm 0.33$                              | $-0.64 \pm 0.35$                               | $0.43 \pm 0.28$                                |
|                                 | badq | $-192711.46 \pm 0.06$                    | $-1.21 \pm 0.36$                             | $0.17 \pm 0.75$                               | $-1.51 \pm 0.50$                               | $1.68 \pm 0.56$                                |

Table 20: MM-to-QM aqueous-phase solvation free energy correction values from 3- $\lambda$  states simulated for 50 ps

| Molec.                                       | MM'  | $\Delta G_{\text{TI3}}^{N_\lambda=11}$ | $\Delta\Delta G_{\text{TI}}^{N_\lambda=3}$ | $\Delta\Delta G_{\text{BAR}}^{N_\lambda=3}$ | $\Delta\Delta G_{\text{IEXP}}^{N_\lambda=2}$ | $\Delta\Delta G_{\text{DEXP}}^{N_\lambda=2}$ |
|----------------------------------------------|------|----------------------------------------|--------------------------------------------|---------------------------------------------|----------------------------------------------|----------------------------------------------|
| CO <sub>3</sub> <sup>2-</sup>                |      | -165240.53 ± 0.11                      | 0.48 ± 0.56                                | -0.70 ± 0.68                                | -3.41 ± 0.53                                 | 1.41 ± 0.52                                  |
|                                              | b    | -165222.41 ± 0.06                      | 0.46 ± 0.33                                | 0.33 ± 0.25                                 | 0.32 ± 0.28                                  | 0.49 ± 0.35                                  |
|                                              | ba   | -165287.40 ± 0.05                      | 0.03 ± 0.28                                | 0.27 ± 0.23                                 | -0.57 ± 0.24                                 | 0.78 ± 0.34                                  |
|                                              | bad  | -165339.45 ± 0.05                      | 0.97 ± 0.25                                | 0.87 ± 0.24                                 | 0.32 ± 0.46                                  | 1.29 ± 0.40                                  |
|                                              | badq | -165328.69 ± 0.05                      | -0.39 ± 0.30                               | -0.50 ± 0.23                                | 0.79 ± 0.40                                  | -0.79 ± 0.31                                 |
| CH <sub>3</sub> NH <sub>3</sub> <sup>+</sup> |      | -60348.42 ± 0.04                       | -0.26 ± 0.19                               | -0.25 ± 0.15                                | -0.21 ± 0.26                                 | -0.34 ± 0.26                                 |
|                                              | b    | -60352.99 ± 0.02                       | -0.10 ± 0.09                               | -0.09 ± 0.07                                | -0.01 ± 0.15                                 | -0.16 ± 0.13                                 |
|                                              | ba   | -60355.28 ± 0.01                       | 0.09 ± 0.07                                | 0.08 ± 0.06                                 | 0.11 ± 0.09                                  | 0.05 ± 0.07                                  |
|                                              | bad  | -60355.56 ± 0.02                       | -0.06 ± 0.07                               | -0.06 ± 0.06                                | 0.01 ± 0.09                                  | -0.13 ± 0.09                                 |
|                                              | badq | -60351.61 ± 0.01                       | -0.02 ± 0.07                               | 0.00 ± 0.05                                 | 0.01 ± 0.08                                  | -0.02 ± 0.09                                 |
| NH <sub>4</sub> <sup>+</sup>                 |      | -35650.57 ± 0.04                       | 0.27 ± 0.17                                | 0.25 ± 0.16                                 | 0.10 ± 0.26                                  | 0.07 ± 0.29                                  |
|                                              | b    | -35656.79 ± 0.01                       | 0.00 ± 0.03                                | 0.00 ± 0.03                                 | -0.02 ± 0.03                                 | 0.02 ± 0.04                                  |
|                                              | ba   | -35657.95 ± 0.01                       | -0.03 ± 0.02                               | -0.04 ± 0.02                                | -0.03 ± 0.03                                 | -0.04 ± 0.03                                 |
|                                              | bad  | -35657.95 ± 0.01                       | -0.03 ± 0.02                               | -0.04 ± 0.02                                | -0.03 ± 0.03                                 | -0.04 ± 0.03                                 |
|                                              | badq | -35657.18 ± 0.01                       | -0.04 ± 0.03                               | -0.05 ± 0.02                                | -0.06 ± 0.04                                 | -0.04 ± 0.03                                 |
| CH <sub>3</sub> CO <sub>2</sub> <sup>-</sup> |      | -143235.31 ± 0.07                      | 0.96 ± 0.35                                | 0.54 ± 0.34                                 | 0.59 ± 0.54                                  | 1.25 ± 0.31                                  |
|                                              | b    | -143222.40 ± 0.05                      | -0.03 ± 0.25                               | -0.08 ± 0.26                                | -0.35 ± 0.37                                 | -0.16 ± 0.41                                 |
|                                              | ba   | -143272.32 ± 0.04                      | -0.09 ± 0.21                               | -0.01 ± 0.18                                | -0.23 ± 0.26                                 | 0.14 ± 0.27                                  |
|                                              | bad  | -143277.15 ± 0.04                      | -0.02 ± 0.19                               | -0.03 ± 0.18                                | -0.27 ± 0.28                                 | 0.06 ± 0.28                                  |
|                                              | badq | -143305.89 ± 0.06                      | 0.10 ± 0.21                                | 0.17 ± 0.26                                 | -0.91 ± 0.34                                 | 1.32 ± 0.30                                  |
| H <sub>3</sub> O <sup>+</sup>                |      | -48062.72 ± 0.05                       | 0.47 ± 0.29                                | 0.21 ± 0.29                                 | 0.98 ± 0.63                                  | 0.67 ± 0.40                                  |
|                                              | b    | -48067.54 ± 0.04                       | 0.11 ± 0.20                                | 0.12 ± 0.24                                 | -0.17 ± 0.32                                 | 0.32 ± 0.39                                  |
|                                              | ba   | -48070.58 ± 0.01                       | -0.06 ± 0.06                               | -0.04 ± 0.05                                | -0.05 ± 0.06                                 | -0.07 ± 0.07                                 |

*Continued on next page*

Table 20 – *Continued from previous page*

| Molec.                           | MM'  | $\Delta G_{\text{TI3}}^{N_i=11}$ | $\Delta\Delta G_{\text{TI}}^{N_i=3}$ | $\Delta\Delta G_{\text{BAR}}^{N_i=3}$ | $\Delta\Delta G_{\text{IEXP}}^{N_i=2}$ | $\Delta\Delta G_{\text{DEXP}}^{N_i=2}$ |
|----------------------------------|------|----------------------------------|--------------------------------------|---------------------------------------|----------------------------------------|----------------------------------------|
| C <sub>6</sub> H <sub>5</sub> Cl | bad  | -48070.58 ± 0.01                 | -0.06 ± 0.06                         | -0.04 ± 0.05                          | -0.05 ± 0.06                           | -0.07 ± 0.07                           |
|                                  | badq | -48070.60 ± 0.01                 | 0.03 ± 0.05                          | 0.04 ± 0.05                           | 0.01 ± 0.06                            | 0.05 ± 0.07                            |
|                                  |      | -433851.87 ± 0.03                | 0.20 ± 0.17                          | 0.25 ± 0.13                           | 0.19 ± 0.17                            | -0.08 ± 0.22                           |
|                                  | b    | -433850.81 ± 0.04                | -0.02 ± 0.15                         | 0.02 ± 0.11                           | 0.08 ± 0.16                            | -0.13 ± 0.16                           |
|                                  | ba   | -433854.43 ± 0.03                | 0.00 ± 0.12                          | 0.00 ± 0.09                           | 0.27 ± 0.16                            | -0.06 ± 0.11                           |
|                                  | bad  | -433856.05 ± 0.03                | -0.17 ± 0.09                         | -0.16 ± 0.09                          | -0.03 ± 0.21                           | -0.13 ± 0.12                           |
| C <sub>6</sub> H <sub>14</sub>   | badq | -433860.24 ± 0.04                | 0.01 ± 0.11                          | 0.02 ± 0.09                           | 0.08 ± 0.13                            | -0.02 ± 0.15                           |
|                                  |      | -148579.99 ± 0.03                | 0.06 ± 0.17                          | 0.07 ± 0.11                           | 0.17 ± 0.14                            | -0.30 ± 0.28                           |
|                                  | b    | -148580.59 ± 0.03                | 0.15 ± 0.14                          | 0.16 ± 0.09                           | 0.23 ± 0.17                            | -0.08 ± 0.20                           |
|                                  | ba   | -148579.49 ± 0.03                | -0.15 ± 0.10                         | -0.12 ± 0.09                          | -0.20 ± 0.12                           | 0.00 ± 0.11                            |
|                                  | bad  | -148579.45 ± 0.03                | -0.12 ± 0.10                         | -0.09 ± 0.09                          | -0.06 ± 0.18                           | -0.02 ± 0.13                           |
|                                  | badq | -148576.82 ± 0.03                | -0.07 ± 0.12                         | -0.08 ± 0.10                          | -0.13 ± 0.15                           | -0.07 ± 0.16                           |
| CH <sub>3</sub> OH               |      | -72530.37 ± 0.03                 | -0.12 ± 0.15                         | -0.13 ± 0.13                          | -0.25 ± 0.26                           | -0.11 ± 0.24                           |
|                                  | b    | -72530.81 ± 0.03                 | -0.09 ± 0.16                         | -0.13 ± 0.12                          | -0.07 ± 0.18                           | -0.07 ± 0.17                           |
|                                  | ba   | -72530.76 ± 0.03                 | -0.01 ± 0.14                         | -0.05 ± 0.13                          | -0.26 ± 0.17                           | 0.11 ± 0.18                            |
|                                  | bad  | -72530.78 ± 0.03                 | 0.15 ± 0.15                          | 0.16 ± 0.13                           | -0.22 ± 0.15                           | 0.29 ± 0.21                            |
|                                  | badq | -72530.61 ± 0.03                 | -0.12 ± 0.19                         | -0.11 ± 0.14                          | 0.09 ± 0.27                            | -0.55 ± 0.27                           |
|                                  |      | -50024.16 ± 0.02                 | -0.02 ± 0.07                         | -0.01 ± 0.07                          | -0.02 ± 0.11                           | 0.01 ± 0.09                            |
| C <sub>2</sub> H <sub>6</sub>    | b    | -50024.32 ± 0.01                 | -0.16 ± 0.07                         | -0.16 ± 0.05                          | -0.22 ± 0.07                           | -0.14 ± 0.09                           |
|                                  | ba   | -50024.08 ± 0.01                 | -0.02 ± 0.07                         | -0.03 ± 0.06                          | -0.01 ± 0.07                           | -0.04 ± 0.07                           |
|                                  | bad  | -50024.17 ± 0.01                 | -0.06 ± 0.06                         | -0.06 ± 0.05                          | -0.07 ± 0.06                           | -0.06 ± 0.06                           |
|                                  | badq | -50024.33 ± 0.01                 | 0.04 ± 0.06                          | 0.02 ± 0.05                           | 0.01 ± 0.07                            | 0.01 ± 0.08                            |
|                                  |      | -145701.53 ± 0.05                | -0.06 ± 0.21                         | -0.08 ± 0.19                          | -0.27 ± 0.29                           | 0.22 ± 0.36                            |
|                                  | b    | -145701.13 ± 0.05                | -0.32 ± 0.26                         | -0.32 ± 0.22                          | -0.31 ± 0.32                           | -0.13 ± 0.26                           |

*Continued on next page*



Table 20 – *Continued from previous page*

| Molec.                            | MM'  | $\Delta G_{\text{TI3}}^{N_i=11}$ | $\Delta\Delta G_{\text{TI}}^{N_i=3}$ | $\Delta\Delta G_{\text{BAR}}^{N_i=3}$ | $\Delta\Delta G_{\text{IEXP}}^{N_i=2}$ | $\Delta\Delta G_{\text{DEXP}}^{N_i=2}$ |
|-----------------------------------|------|----------------------------------|--------------------------------------|---------------------------------------|----------------------------------------|----------------------------------------|
|                                   | ba   | -145699.24 ± 0.03                | -0.01 ± 0.17                         | 0.02 ± 0.19                           | -0.11 ± 0.39                           | 0.15 ± 0.23                            |
|                                   | bad  | -145700.24 ± 0.03                | -0.13 ± 0.16                         | -0.22 ± 0.15                          | -0.14 ± 0.28                           | -0.30 ± 0.21                           |
|                                   | badq | -145684.45 ± 0.03                | -0.19 ± 0.17                         | -0.18 ± 0.17                          | -0.02 ± 0.25                           | -0.16 ± 0.21                           |
| $\text{C}(\text{NH}_2)_3^+$       |      | -128902.19 ± 0.05                | 0.64 ± 0.27                          | 0.26 ± 0.22                           | -0.54 ± 0.29                           | 0.70 ± 0.25                            |
|                                   | b    | -128907.35 ± 0.05                | 0.30 ± 0.21                          | 0.11 ± 0.19                           | -0.09 ± 0.34                           | 0.27 ± 0.23                            |
|                                   | ba   | -128933.28 ± 0.04                | 0.01 ± 0.18                          | -0.10 ± 0.16                          | -0.38 ± 0.16                           | -0.12 ± 0.24                           |
|                                   | bad  | -128936.23 ± 0.04                | 0.11 ± 0.16                          | 0.06 ± 0.14                           | -0.06 ± 0.14                           | -0.04 ± 0.23                           |
|                                   | badq | -128918.95 ± 0.04                | -0.04 ± 0.17                         | -0.03 ± 0.15                          | -0.35 ± 0.16                           | 0.17 ± 0.19                            |
| $\text{C}_6\text{H}_5\text{NH}_2$ |      | -180230.53 ± 0.04                | 0.07 ± 0.21                          | 0.11 ± 0.18                           | 0.42 ± 0.45                            | 0.24 ± 0.29                            |
|                                   | b    | -180230.55 ± 0.04                | 0.06 ± 0.16                          | 0.12 ± 0.15                           | -0.18 ± 0.25                           | 0.39 ± 0.22                            |
|                                   | ba   | -180233.99 ± 0.04                | 0.21 ± 0.19                          | 0.13 ± 0.15                           | 0.17 ± 0.20                            | 0.15 ± 0.21                            |
|                                   | bad  | -180233.04 ± 0.04                | 0.56 ± 0.17                          | 0.45 ± 0.16                           | 0.36 ± 0.25                            | 0.43 ± 0.22                            |
|                                   | badq | -180262.07 ± 0.07                | -1.09 ± 0.25                         | -0.91 ± 0.28                          | -2.27 ± 0.35                           | 0.34 ± 0.35                            |
| $\text{CH}_3\text{CONH}_2$        |      | -131079.14 ± 0.05                | -0.05 ± 0.25                         | 0.01 ± 0.25                           | 0.16 ± 0.40                            | -0.09 ± 0.41                           |
|                                   | b    | -131078.83 ± 0.04                | -0.30 ± 0.22                         | -0.20 ± 0.20                          | 0.06 ± 0.26                            | -0.02 ± 0.29                           |
|                                   | ba   | -131083.77 ± 0.04                | 0.28 ± 0.22                          | 0.33 ± 0.23                           | 0.43 ± 0.48                            | -0.13 ± 0.53                           |
|                                   | bad  | -131084.84 ± 0.04                | -0.25 ± 0.21                         | -0.20 ± 0.20                          | 0.12 ± 0.46                            | -0.80 ± 0.43                           |
|                                   | badq | -131071.30 ± 0.03                | 0.17 ± 0.18                          | 0.23 ± 0.18                           | 0.15 ± 0.20                            | 0.29 ± 0.48                            |
| $\text{H}_2\text{O}$              |      | -47896.99 ± 0.03                 | -0.20 ± 0.16                         | -0.20 ± 0.15                          | -0.35 ± 0.16                           | -0.35 ± 0.29                           |
|                                   | b    | -47897.87 ± 0.03                 | 0.13 ± 0.13                          | 0.15 ± 0.15                           | -0.31 ± 0.16                           | 0.48 ± 0.25                            |
|                                   | ba   | -47898.10 ± 0.03                 | 0.40 ± 0.13                          | 0.39 ± 0.12                           | -0.11 ± 0.16                           | 0.72 ± 0.19                            |
|                                   | bad  | -47898.10 ± 0.03                 | 0.40 ± 0.13                          | 0.39 ± 0.12                           | -0.11 ± 0.16                           | 0.72 ± 0.19                            |
|                                   | badq | -47897.84 ± 0.03                 | 0.11 ± 0.15                          | 0.07 ± 0.18                           | 0.01 ± 0.19                            | 0.18 ± 0.35                            |
| $\text{C}_2\text{H}_5\text{OH}$   |      | -97165.69 ± 0.04                 | -0.13 ± 0.16                         | -0.09 ± 0.16                          | -0.32 ± 0.18                           | -0.39 ± 0.23                           |

*Continued on next page*

Table 20 – *Continued from previous page*

| Molec.                          | MM'  | $\Delta G_{\text{TI3}}^{N_i=11}$ | $\Delta\Delta G_{\text{TI}}^{N_i=3}$ | $\Delta\Delta G_{\text{BAR}}^{N_i=3}$ | $\Delta\Delta G_{\text{IEXP}}^{N_i=2}$ | $\Delta\Delta G_{\text{DEXP}}^{N_i=2}$ |
|---------------------------------|------|----------------------------------|--------------------------------------|---------------------------------------|----------------------------------------|----------------------------------------|
|                                 | b    | $-97165.97 \pm 0.04$             | $0.02 \pm 0.17$                      | $-0.05 \pm 0.15$                      | $0.12 \pm 0.40$                        | $0.08 \pm 0.19$                        |
|                                 | ba   | $-97166.30 \pm 0.04$             | $0.37 \pm 0.18$                      | $0.36 \pm 0.16$                       | $0.06 \pm 0.18$                        | $-0.02 \pm 0.37$                       |
|                                 | bad  | $-97166.59 \pm 0.04$             | $-0.12 \pm 0.15$                     | $-0.08 \pm 0.16$                      | $-0.54 \pm 0.15$                       | $0.06 \pm 0.32$                        |
|                                 | badq | $-97165.26 \pm 0.03$             | $-0.23 \pm 0.14$                     | $-0.13 \pm 0.15$                      | $-0.20 \pm 0.24$                       | $0.12 \pm 0.21$                        |
| $\text{C}_6\text{H}_6$          |      | $-145560.94 \pm 0.02$            | $0.05 \pm 0.11$                      | $0.05 \pm 0.08$                       | $0.10 \pm 0.14$                        | $0.00 \pm 0.10$                        |
|                                 | b    | $-145561.20 \pm 0.02$            | $-0.11 \pm 0.09$                     | $-0.05 \pm 0.08$                      | $-0.07 \pm 0.09$                       | $-0.09 \pm 0.12$                       |
|                                 | ba   | $-145564.93 \pm 0.02$            | $0.12 \pm 0.09$                      | $0.13 \pm 0.07$                       | $0.13 \pm 0.10$                        | $0.00 \pm 0.17$                        |
|                                 | bad  | $-145563.51 \pm 0.02$            | $-0.03 \pm 0.09$                     | $0.01 \pm 0.07$                       | $0.01 \pm 0.10$                        | $-0.12 \pm 0.12$                       |
|                                 | badq | $-145563.88 \pm 0.02$            | $-0.01 \pm 0.09$                     | $-0.01 \pm 0.07$                      | $0.05 \pm 0.11$                        | $-0.06 \pm 0.16$                       |
| $\text{C}_6\text{H}_5\text{OH}$ |      | $-192696.13 \pm 0.03$            | $0.32 \pm 0.16$                      | $0.32 \pm 0.20$                       | $0.06 \pm 0.28$                        | $0.47 \pm 0.26$                        |
|                                 | b    | $-192696.41 \pm 0.04$            | $-0.29 \pm 0.18$                     | $-0.29 \pm 0.18$                      | $-0.21 \pm 0.35$                       | $-0.53 \pm 0.33$                       |
|                                 | ba   | $-192700.83 \pm 0.03$            | $-0.05 \pm 0.17$                     | $-0.01 \pm 0.18$                      | $-0.14 \pm 0.27$                       | $0.07 \pm 0.23$                        |
|                                 | bad  | $-192699.26 \pm 0.03$            | $-0.30 \pm 0.15$                     | $-0.27 \pm 0.18$                      | $-0.32 \pm 0.27$                       | $-0.10 \pm 0.22$                       |
|                                 | badq | $-192711.46 \pm 0.06$            | $-0.25 \pm 0.29$                     | $-0.26 \pm 0.41$                      | $-0.32 \pm 0.43$                       | $0.88 \pm 0.47$                        |

Table 21: MM-to-QM aqueous-phase solvation free energy correction values from 6- $\lambda$  states simulated for 50 ps

| Molec.                                       | MM'  | $\Delta G_{\text{TI3}}^{N_\lambda=11}$ | $\Delta\Delta G_{\text{TI}}^{N_\lambda=6}$ | $\Delta\Delta G_{\text{BAR}}^{N_\lambda=6}$ | $\Delta\Delta G_{\text{IEXP}}^{N_\lambda=5}$ | $\Delta\Delta G_{\text{DEXP}}^{N_\lambda=5}$ |
|----------------------------------------------|------|----------------------------------------|--------------------------------------------|---------------------------------------------|----------------------------------------------|----------------------------------------------|
| CO <sub>3</sub> <sup>2-</sup>                |      | -165240.53 ± 0.11                      | -0.32 ± 0.37                               | -0.37 ± 0.31                                | -0.92 ± 0.45                                 | -0.38 ± 0.41                                 |
|                                              | b    | -165222.41 ± 0.06                      | 0.17 ± 0.20                                | 0.16 ± 0.17                                 | 0.42 ± 0.42                                  | 0.13 ± 0.28                                  |
|                                              | ba   | -165287.40 ± 0.05                      | 0.27 ± 0.18                                | 0.29 ± 0.16                                 | 0.12 ± 0.23                                  | 0.40 ± 0.23                                  |
|                                              | bad  | -165339.45 ± 0.05                      | 0.34 ± 0.18                                | 0.36 ± 0.14                                 | 0.36 ± 0.23                                  | 0.42 ± 0.22                                  |
|                                              | badq | -165328.69 ± 0.05                      | -0.26 ± 0.17                               | -0.24 ± 0.15                                | -0.14 ± 0.21                                 | -0.47 ± 0.21                                 |
| CH <sub>3</sub> NH <sub>3</sub> <sup>+</sup> |      | -60348.42 ± 0.04                       | -0.20 ± 0.14                               | -0.21 ± 0.11                                | 0.07 ± 0.16                                  | -0.25 ± 0.16                                 |
|                                              | b    | -60352.99 ± 0.02                       | -0.02 ± 0.06                               | -0.02 ± 0.05                                | 0.00 ± 0.07                                  | -0.03 ± 0.07                                 |
|                                              | ba   | -60355.28 ± 0.01                       | 0.10 ± 0.05                                | 0.09 ± 0.04                                 | 0.10 ± 0.05                                  | 0.07 ± 0.05                                  |
|                                              | bad  | -60355.56 ± 0.02                       | -0.05 ± 0.05                               | -0.06 ± 0.04                                | -0.02 ± 0.06                                 | -0.10 ± 0.06                                 |
|                                              | badq | -60351.61 ± 0.01                       | -0.11 ± 0.04                               | -0.10 ± 0.03                                | -0.09 ± 0.05                                 | -0.11 ± 0.05                                 |
| NH <sub>4</sub> <sup>+</sup>                 |      | -35650.57 ± 0.04                       | 0.27 ± 0.13                                | 0.24 ± 0.10                                 | 0.37 ± 0.16                                  | 0.19 ± 0.13                                  |
|                                              | b    | -35656.79 ± 0.01                       | 0.01 ± 0.02                                | 0.01 ± 0.02                                 | 0.00 ± 0.02                                  | 0.01 ± 0.02                                  |
|                                              | ba   | -35657.95 ± 0.01                       | -0.02 ± 0.02                               | -0.02 ± 0.01                                | -0.02 ± 0.02                                 | -0.03 ± 0.02                                 |
|                                              | bad  | -35657.95 ± 0.01                       | -0.02 ± 0.02                               | -0.02 ± 0.01                                | -0.02 ± 0.02                                 | -0.03 ± 0.02                                 |
|                                              | badq | -35657.18 ± 0.01                       | -0.04 ± 0.02                               | -0.04 ± 0.02                                | -0.04 ± 0.02                                 | -0.03 ± 0.02                                 |
| CH <sub>3</sub> CO <sub>2</sub> <sup>-</sup> |      | -143235.31 ± 0.07                      | 0.43 ± 0.24                                | 0.28 ± 0.19                                 | 0.88 ± 0.47                                  | 0.25 ± 0.26                                  |
|                                              | b    | -143222.40 ± 0.05                      | 0.47 ± 0.15                                | 0.43 ± 0.14                                 | 0.32 ± 0.19                                  | 0.48 ± 0.22                                  |
|                                              | ba   | -143272.32 ± 0.04                      | 0.09 ± 0.15                                | 0.07 ± 0.12                                 | 0.25 ± 0.19                                  | 0.05 ± 0.16                                  |
|                                              | bad  | -143277.15 ± 0.04                      | 0.10 ± 0.12                                | 0.07 ± 0.11                                 | -0.02 ± 0.15                                 | 0.13 ± 0.16                                  |
|                                              | badq | -143305.89 ± 0.06                      | -0.26 ± 0.18                               | -0.26 ± 0.16                                | -0.27 ± 0.29                                 | -0.15 ± 0.20                                 |
| H <sub>3</sub> O <sup>+</sup>                |      | -48062.72 ± 0.05                       | 0.05 ± 0.18                                | 0.00 ± 0.15                                 | 0.22 ± 0.27                                  | -0.02 ± 0.20                                 |
|                                              | b    | -48067.54 ± 0.04                       | -0.25 ± 0.14                               | -0.24 ± 0.11                                | -0.28 ± 0.16                                 | -0.21 ± 0.16                                 |
|                                              | ba   | -48070.58 ± 0.01                       | 0.06 ± 0.03                                | 0.06 ± 0.03                                 | 0.06 ± 0.04                                  | 0.06 ± 0.04                                  |

*Continued on next page*

Table 21 – *Continued from previous page*

| Molec.                          | MM'  | $\Delta G_{\text{TI3}}^{N_i=11}$ | $\Delta \Delta G_{\text{TI}}^{N_i=6}$ | $\Delta \Delta G_{\text{BAR}}^{N_i=6}$ | $\Delta \Delta G_{\text{IEXP}}^{N_i=5}$ | $\Delta \Delta G_{\text{DEXP}}^{N_i=5}$ |
|---------------------------------|------|----------------------------------|---------------------------------------|----------------------------------------|-----------------------------------------|-----------------------------------------|
|                                 | bad  | $-48070.58 \pm 0.01$             | $0.06 \pm 0.03$                       | $0.06 \pm 0.03$                        | $0.06 \pm 0.04$                         | $0.06 \pm 0.04$                         |
|                                 | badq | $-48070.60 \pm 0.01$             | $-0.03 \pm 0.03$                      | $-0.03 \pm 0.03$                       | $-0.04 \pm 0.03$                        | $-0.02 \pm 0.04$                        |
| $\text{C}_6\text{H}_5\text{Cl}$ |      | $-433851.87 \pm 0.03$            | $0.18 \pm 0.09$                       | $0.20 \pm 0.08$                        | $0.20 \pm 0.10$                         | $0.16 \pm 0.11$                         |
|                                 | b    | $-433850.81 \pm 0.04$            | $0.07 \pm 0.08$                       | $0.07 \pm 0.07$                        | $0.06 \pm 0.10$                         | $0.08 \pm 0.09$                         |
|                                 | ba   | $-433854.43 \pm 0.03$            | $0.03 \pm 0.08$                       | $0.03 \pm 0.07$                        | $0.08 \pm 0.09$                         | $-0.01 \pm 0.09$                        |
|                                 | bad  | $-433856.05 \pm 0.03$            | $0.01 \pm 0.08$                       | $0.02 \pm 0.07$                        | $0.05 \pm 0.09$                         | $-0.02 \pm 0.09$                        |
|                                 | badq | $-433860.24 \pm 0.04$            | $0.16 \pm 0.08$                       | $0.15 \pm 0.07$                        | $0.20 \pm 0.09$                         | $0.10 \pm 0.10$                         |
| $\text{C}_6\text{H}_{14}$       |      | $-148579.99 \pm 0.03$            | $-0.16 \pm 0.09$                      | $-0.15 \pm 0.08$                       | $-0.12 \pm 0.10$                        | $-0.21 \pm 0.12$                        |
|                                 | b    | $-148580.59 \pm 0.03$            | $-0.05 \pm 0.09$                      | $-0.02 \pm 0.08$                       | $0.00 \pm 0.09$                         | $-0.13 \pm 0.12$                        |
|                                 | ba   | $-148579.49 \pm 0.03$            | $-0.23 \pm 0.08$                      | $-0.20 \pm 0.06$                       | $-0.22 \pm 0.09$                        | $-0.19 \pm 0.09$                        |
|                                 | bad  | $-148579.45 \pm 0.03$            | $-0.10 \pm 0.09$                      | $-0.10 \pm 0.07$                       | $-0.05 \pm 0.09$                        | $-0.15 \pm 0.09$                        |
|                                 | badq | $-148576.82 \pm 0.03$            | $-0.28 \pm 0.09$                      | $-0.27 \pm 0.08$                       | $-0.22 \pm 0.10$                        | $-0.32 \pm 0.11$                        |
| $\text{CH}_3\text{OH}$          |      | $-72530.37 \pm 0.03$             | $0.21 \pm 0.10$                       | $0.20 \pm 0.10$                        | $0.15 \pm 0.15$                         | $0.19 \pm 0.14$                         |
|                                 | b    | $-72530.81 \pm 0.03$             | $0.31 \pm 0.10$                       | $0.28 \pm 0.08$                        | $0.26 \pm 0.10$                         | $0.27 \pm 0.12$                         |
|                                 | ba   | $-72530.76 \pm 0.03$             | $0.01 \pm 0.11$                       | $0.01 \pm 0.10$                        | $0.06 \pm 0.16$                         | $-0.03 \pm 0.16$                        |
|                                 | bad  | $-72530.78 \pm 0.03$             | $-0.21 \pm 0.10$                      | $-0.21 \pm 0.08$                       | $-0.26 \pm 0.11$                        | $-0.20 \pm 0.11$                        |
|                                 | badq | $-72530.61 \pm 0.03$             | $-0.38 \pm 0.09$                      | $-0.38 \pm 0.08$                       | $-0.42 \pm 0.11$                        | $-0.33 \pm 0.11$                        |
| $\text{C}_2\text{H}_6$          |      | $-50024.16 \pm 0.02$             | $-0.08 \pm 0.05$                      | $-0.08 \pm 0.04$                       | $-0.08 \pm 0.06$                        | $-0.08 \pm 0.06$                        |
|                                 | b    | $-50024.32 \pm 0.01$             | $-0.03 \pm 0.04$                      | $-0.04 \pm 0.03$                       | $-0.05 \pm 0.05$                        | $-0.03 \pm 0.05$                        |
|                                 | ba   | $-50024.08 \pm 0.01$             | $-0.02 \pm 0.04$                      | $-0.03 \pm 0.03$                       | $-0.04 \pm 0.04$                        | $-0.01 \pm 0.04$                        |
|                                 | bad  | $-50024.17 \pm 0.01$             | $-0.01 \pm 0.04$                      | $-0.02 \pm 0.03$                       | $-0.03 \pm 0.04$                        | $-0.01 \pm 0.04$                        |
|                                 | badq | $-50024.33 \pm 0.01$             | $0.03 \pm 0.04$                       | $0.02 \pm 0.03$                        | $0.02 \pm 0.04$                         | $0.03 \pm 0.04$                         |
| $(\text{CH}_2)_4\text{O}$       |      | $-145701.53 \pm 0.05$            | $-0.11 \pm 0.14$                      | $-0.15 \pm 0.12$                       | $-0.18 \pm 0.18$                        | $-0.06 \pm 0.16$                        |
|                                 | b    | $-145701.13 \pm 0.05$            | $-0.14 \pm 0.16$                      | $-0.15 \pm 0.14$                       | $-0.19 \pm 0.21$                        | $-0.07 \pm 0.20$                        |

*Continued on next page*

Table 21 – *Continued from previous page*

| Molec.                            | MM'  | $\Delta G_{\text{TI3}}^{N_i=11}$ | $\Delta\Delta G_{\text{TI}}^{N_i=6}$ | $\Delta\Delta G_{\text{BAR}}^{N_i=6}$ | $\Delta\Delta G_{\text{IEXP}}^{N_i=5}$ | $\Delta\Delta G_{\text{DEXP}}^{N_i=5}$ |
|-----------------------------------|------|----------------------------------|--------------------------------------|---------------------------------------|----------------------------------------|----------------------------------------|
|                                   | ba   | -145699.24 ± 0.03                | 0.18 ± 0.11                          | 0.17 ± 0.10                           | 0.12 ± 0.15                            | 0.26 ± 0.16                            |
|                                   | bad  | -145700.24 ± 0.03                | -0.05 ± 0.11                         | -0.09 ± 0.12                          | -0.07 ± 0.18                           | -0.12 ± 0.17                           |
|                                   | badq | -145684.45 ± 0.03                | -0.16 ± 0.10                         | -0.16 ± 0.09                          | -0.12 ± 0.13                           | -0.18 ± 0.12                           |
| $\text{C}(\text{NH}_2)_3^+$       |      | -128902.19 ± 0.05                | 0.20 ± 0.20                          | 0.15 ± 0.15                           | 0.15 ± 0.22                            | -0.02 ± 0.21                           |
|                                   | b    | -128907.35 ± 0.05                | 0.04 ± 0.13                          | 0.05 ± 0.11                           | -0.17 ± 0.15                           | 0.10 ± 0.17                            |
|                                   | ba   | -128933.28 ± 0.04                | -0.01 ± 0.12                         | -0.04 ± 0.11                          | 0.00 ± 0.17                            | -0.09 ± 0.16                           |
|                                   | bad  | -128936.23 ± 0.04                | -0.12 ± 0.12                         | -0.13 ± 0.10                          | 0.00 ± 0.17                            | -0.20 ± 0.13                           |
|                                   | badq | -128918.95 ± 0.04                | 0.13 ± 0.13                          | 0.13 ± 0.10                           | 0.10 ± 0.15                            | 0.14 ± 0.14                            |
| $\text{C}_6\text{H}_5\text{NH}_2$ |      | -180230.53 ± 0.04                | 0.18 ± 0.15                          | 0.19 ± 0.13                           | 0.30 ± 0.17                            | 0.13 ± 0.18                            |
|                                   | b    | -180230.55 ± 0.04                | -0.02 ± 0.13                         | -0.03 ± 0.12                          | -0.04 ± 0.18                           | 0.04 ± 0.16                            |
|                                   | ba   | -180233.99 ± 0.04                | 0.01 ± 0.13                          | 0.00 ± 0.11                           | 0.13 ± 0.17                            | -0.05 ± 0.15                           |
|                                   | bad  | -180233.04 ± 0.04                | 0.11 ± 0.12                          | 0.09 ± 0.10                           | 0.07 ± 0.14                            | 0.06 ± 0.16                            |
|                                   | badq | -180262.07 ± 0.07                | 0.10 ± 0.21                          | 0.16 ± 0.17                           | 0.03 ± 0.23                            | 0.07 ± 0.29                            |
| $\text{CH}_3\text{CONH}_2$        |      | -131079.14 ± 0.05                | 0.05 ± 0.16                          | 0.08 ± 0.17                           | 0.12 ± 0.23                            | 0.02 ± 0.26                            |
|                                   | b    | -131078.83 ± 0.04                | 0.28 ± 0.15                          | 0.26 ± 0.13                           | 0.29 ± 0.17                            | 0.30 ± 0.16                            |
|                                   | ba   | -131083.77 ± 0.04                | -0.04 ± 0.14                         | -0.02 ± 0.14                          | -0.02 ± 0.22                           | -0.04 ± 0.24                           |
|                                   | bad  | -131084.84 ± 0.04                | 0.18 ± 0.13                          | 0.15 ± 0.14                           | 0.19 ± 0.23                            | 0.12 ± 0.23                            |
|                                   | badq | -131071.30 ± 0.03                | -0.01 ± 0.11                         | 0.00 ± 0.10                           | -0.04 ± 0.14                           | 0.05 ± 0.15                            |
| $\text{H}_2\text{O}$              |      | -47896.99 ± 0.03                 | 0.10 ± 0.11                          | 0.10 ± 0.11                           | 0.15 ± 0.14                            | 0.00 ± 0.21                            |
|                                   | b    | -47897.87 ± 0.03                 | -0.07 ± 0.10                         | -0.05 ± 0.11                          | -0.09 ± 0.17                           | 0.02 ± 0.17                            |
|                                   | ba   | -47898.10 ± 0.03                 | 0.01 ± 0.10                          | 0.03 ± 0.09                           | -0.07 ± 0.12                           | 0.10 ± 0.14                            |
|                                   | bad  | -47898.10 ± 0.03                 | 0.01 ± 0.10                          | 0.03 ± 0.09                           | -0.07 ± 0.12                           | 0.10 ± 0.14                            |
|                                   | badq | -47897.84 ± 0.03                 | 0.08 ± 0.10                          | 0.09 ± 0.10                           | 0.11 ± 0.17                            | 0.05 ± 0.16                            |
| $\text{C}_2\text{H}_5\text{OH}$   |      | -97165.69 ± 0.04                 | 0.15 ± 0.13                          | 0.15 ± 0.10                           | 0.17 ± 0.15                            | 0.04 ± 0.17                            |

*Continued on next page*

Table 21 – *Continued from previous page*

| Molec.                          | MM'  | $\Delta G_{\text{TI3}}^{N_i=11}$ | $\Delta\Delta G_{\text{TI}}^{N_i=6}$ | $\Delta\Delta G_{\text{BAR}}^{N_i=6}$ | $\Delta\Delta G_{\text{IEXP}}^{N_i=5}$ | $\Delta\Delta G_{\text{DEXP}}^{N_i=5}$ |
|---------------------------------|------|----------------------------------|--------------------------------------|---------------------------------------|----------------------------------------|----------------------------------------|
|                                 | b    | $-97165.97 \pm 0.04$             | $-0.26 \pm 0.12$                     | $-0.26 \pm 0.10$                      | $-0.21 \pm 0.16$                       | $-0.28 \pm 0.16$                       |
|                                 | ba   | $-97166.30 \pm 0.04$             | $-0.08 \pm 0.12$                     | $-0.07 \pm 0.11$                      | $-0.08 \pm 0.15$                       | $-0.07 \pm 0.16$                       |
|                                 | bad  | $-97166.59 \pm 0.04$             | $-0.12 \pm 0.12$                     | $-0.14 \pm 0.11$                      | $-0.14 \pm 0.18$                       | $-0.06 \pm 0.16$                       |
|                                 | badq | $-97165.26 \pm 0.03$             | $0.13 \pm 0.10$                      | $0.15 \pm 0.10$                       | $0.10 \pm 0.14$                        | $0.16 \pm 0.18$                        |
| $\text{C}_6\text{H}_6$          |      | $-145560.94 \pm 0.02$            | $0.12 \pm 0.06$                      | $0.12 \pm 0.05$                       | $0.12 \pm 0.08$                        | $0.11 \pm 0.07$                        |
|                                 | b    | $-145561.20 \pm 0.02$            | $-0.03 \pm 0.07$                     | $-0.02 \pm 0.05$                      | $0.02 \pm 0.09$                        | $-0.05 \pm 0.08$                       |
|                                 | ba   | $-145564.93 \pm 0.02$            | $0.00 \pm 0.06$                      | $0.01 \pm 0.05$                       | $0.01 \pm 0.07$                        | $-0.02 \pm 0.08$                       |
|                                 | bad  | $-145563.51 \pm 0.02$            | $-0.04 \pm 0.05$                     | $-0.03 \pm 0.05$                      | $-0.03 \pm 0.07$                       | $-0.04 \pm 0.07$                       |
|                                 | badq | $-145563.88 \pm 0.02$            | $0.04 \pm 0.05$                      | $0.03 \pm 0.04$                       | $0.04 \pm 0.05$                        | $0.03 \pm 0.06$                        |
| $\text{C}_6\text{H}_5\text{OH}$ |      | $-192696.13 \pm 0.03$            | $0.04 \pm 0.11$                      | $0.06 \pm 0.10$                       | $-0.03 \pm 0.14$                       | $0.09 \pm 0.15$                        |
|                                 | b    | $-192696.41 \pm 0.04$            | $-0.08 \pm 0.10$                     | $-0.10 \pm 0.09$                      | $-0.13 \pm 0.13$                       | $-0.09 \pm 0.12$                       |
|                                 | ba   | $-192700.83 \pm 0.03$            | $0.04 \pm 0.09$                      | $0.04 \pm 0.09$                       | $-0.04 \pm 0.12$                       | $0.10 \pm 0.12$                        |
|                                 | bad  | $-192699.26 \pm 0.03$            | $-0.19 \pm 0.09$                     | $-0.18 \pm 0.09$                      | $-0.29 \pm 0.12$                       | $-0.10 \pm 0.13$                       |
|                                 | badq | $-192711.46 \pm 0.06$            | $-0.03 \pm 0.19$                     | $-0.02 \pm 0.16$                      | $-0.33 \pm 0.21$                       | $0.22 \pm 0.28$                        |

Table 22: MM-to-QM aqueous-phase solvation free energy correction values from 2- $\lambda$  states simulated for 20 ps

| Molec.                                       | MM'  | $\Delta G_{\text{TI3}}^{N_\lambda=11}$ | $\Delta\Delta G_{\text{TI}}^{N_\lambda=2}$ | $\Delta\Delta G_{\text{BAR}}^{N_\lambda=2}$ | $\Delta\Delta G_{\text{IEXP}}^{N_\lambda=1}$ | $\Delta\Delta G_{\text{DEXP}}^{N_\lambda=1}$ |
|----------------------------------------------|------|----------------------------------------|--------------------------------------------|---------------------------------------------|----------------------------------------------|----------------------------------------------|
| CO <sub>3</sub> <sup>2-</sup>                |      | -165240.53 ± 0.11                      | 5.54 ± 1.28                                | 4.20 ± 0.77                                 | -10.81 ± 0.54                                | 19.20 ± 0.55                                 |
|                                              | b    | -165222.41 ± 0.06                      | 1.92 ± 0.68                                | 0.15 ± 0.58                                 | -3.17 ± 0.38                                 | 3.47 ± 0.44                                  |
|                                              | ba   | -165287.40 ± 0.05                      | 1.09 ± 0.62                                | -0.73 ± 0.56                                | -3.03 ± 0.37                                 | 1.53 ± 0.44                                  |
|                                              | bad  | -165339.45 ± 0.05                      | 1.71 ± 0.65                                | 0.73 ± 0.47                                 | -3.02 ± 0.37                                 | 4.47 ± 0.30                                  |
|                                              | badq | -165328.69 ± 0.05                      | 1.51 ± 0.45                                | -0.17 ± 0.65                                | -2.41 ± 0.35                                 | 1.98 ± 0.56                                  |
| CH <sub>3</sub> NH <sub>3</sub> <sup>+</sup> |      | -60348.42 ± 0.04                       | 0.40 ± 0.43                                | 0.12 ± 0.42                                 | 0.24 ± 0.51                                  | 0.71 ± 0.33                                  |
|                                              | b    | -60352.99 ± 0.02                       | -0.11 ± 0.21                               | -0.22 ± 0.19                                | -0.28 ± 0.28                                 | -0.16 ± 0.24                                 |
|                                              | ba   | -60355.28 ± 0.01                       | 0.03 ± 0.18                                | 0.02 ± 0.18                                 | -0.08 ± 0.20                                 | -0.13 ± 0.26                                 |
|                                              | bad  | -60355.56 ± 0.02                       | 0.02 ± 0.13                                | 0.05 ± 0.14                                 | -0.08 ± 0.19                                 | 0.31 ± 0.12                                  |
|                                              | badq | -60351.61 ± 0.01                       | 0.02 ± 0.16                                | 0.00 ± 0.15                                 | -0.03 ± 0.22                                 | 0.11 ± 0.16                                  |
| NH <sub>4</sub> <sup>+</sup>                 |      | -35650.57 ± 0.04                       | 0.49 ± 0.25                                | 0.20 ± 0.36                                 | -1.37 ± 0.18                                 | 1.67 ± 0.37                                  |
|                                              | b    | -35656.79 ± 0.01                       | 0.00 ± 0.08                                | -0.01 ± 0.07                                | 0.01 ± 0.10                                  | -0.05 ± 0.08                                 |
|                                              | ba   | -35657.95 ± 0.01                       | -0.06 ± 0.07                               | -0.06 ± 0.06                                | -0.03 ± 0.10                                 | -0.08 ± 0.09                                 |
|                                              | bad  | -35657.95 ± 0.01                       | -0.06 ± 0.07                               | -0.06 ± 0.06                                | -0.03 ± 0.10                                 | -0.08 ± 0.09                                 |
|                                              | badq | -35657.18 ± 0.01                       | 0.04 ± 0.06                                | 0.03 ± 0.06                                 | -0.01 ± 0.09                                 | 0.09 ± 0.07                                  |
| CH <sub>3</sub> CO <sub>2</sub> <sup>-</sup> |      | -143235.31 ± 0.07                      | -0.80 ± 0.70                               | -1.43 ± 0.70                                | -7.82 ± 0.42                                 | 4.95 ± 0.56                                  |
|                                              | b    | -143222.40 ± 0.05                      | 0.57 ± 0.63                                | -0.33 ± 0.62                                | -2.03 ± 0.47                                 | 1.36 ± 0.47                                  |
|                                              | ba   | -143272.32 ± 0.04                      | -0.79 ± 0.35                               | -0.93 ± 0.50                                | -1.87 ± 0.40                                 | 0.13 ± 0.39                                  |
|                                              | bad  | -143277.15 ± 0.04                      | -0.37 ± 0.37                               | -0.29 ± 0.45                                | -2.01 ± 0.41                                 | 1.53 ± 0.23                                  |
|                                              | badq | -143305.89 ± 0.06                      | -0.17 ± 0.60                               | -1.68 ± 0.74                                | -3.27 ± 0.51                                 | -0.18 ± 0.56                                 |
| H <sub>3</sub> O <sup>+</sup>                |      | -48062.72 ± 0.05                       | 1.05 ± 0.68                                | -0.44 ± 0.53                                | -1.50 ± 0.31                                 | -0.48 ± 0.55                                 |
|                                              | b    | -48067.54 ± 0.04                       | 0.31 ± 0.46                                | 0.31 ± 0.39                                 | 0.09 ± 0.40                                  | 0.20 ± 0.46                                  |
|                                              | ba   | -48070.58 ± 0.01                       | 0.08 ± 0.12                                | 0.08 ± 0.11                                 | 0.17 ± 0.15                                  | 0.10 ± 0.11                                  |

*Continued on next page*

Table 22 – Continued from previous page

| Molec.                            | MM'  | $\Delta G_{\text{TI3}}^{N_i=11}$ | $\Delta \Delta G_{\text{TI}}^{N_i=2}$ | $\Delta \Delta G_{\text{BAR}}^{N_i=2}$ | $\Delta \Delta G_{\text{IEXP}}^{N_i=1}$ | $\Delta \Delta G_{\text{DEXP}}^{N_i=1}$ |
|-----------------------------------|------|----------------------------------|---------------------------------------|----------------------------------------|-----------------------------------------|-----------------------------------------|
|                                   | bad  | -48070.58 ± 0.01                 | 0.08 ± 0.12                           | 0.08 ± 0.11                            | 0.17 ± 0.15                             | 0.10 ± 0.11                             |
|                                   | badq | -48070.60 ± 0.01                 | -0.09 ± 0.13                          | -0.09 ± 0.10                           | 0.17 ± 0.15                             | -0.36 ± 0.20                            |
| C <sub>6</sub> H <sub>5</sub> Cl  |      | -433851.87 ± 0.03                | 0.04 ± 0.31                           | 0.52 ± 0.39                            | 0.31 ± 0.36                             | 1.17 ± 0.32                             |
|                                   | b    | -433850.81 ± 0.04                | 0.08 ± 0.31                           | 0.14 ± 0.31                            | -0.01 ± 0.34                            | 0.05 ± 0.47                             |
|                                   | ba   | -433854.43 ± 0.03                | -0.07 ± 0.25                          | -0.09 ± 0.24                           | -0.14 ± 0.23                            | 0.06 ± 0.22                             |
|                                   | bad  | -433856.05 ± 0.03                | 0.32 ± 0.26                           | 0.32 ± 0.32                            | -0.24 ± 0.33                            | 0.63 ± 0.40                             |
|                                   | badq | -433860.24 ± 0.04                | 0.05 ± 0.31                           | 0.08 ± 0.30                            | -0.40 ± 0.26                            | 0.52 ± 0.24                             |
| C <sub>6</sub> H <sub>14</sub>    |      | -148579.99 ± 0.03                | -0.25 ± 0.24                          | -0.53 ± 0.36                           | -1.45 ± 0.20                            | -0.21 ± 0.42                            |
|                                   | b    | -148580.59 ± 0.03                | -0.29 ± 0.25                          | -0.50 ± 0.27                           | -0.69 ± 0.36                            | -0.48 ± 0.37                            |
|                                   | ba   | -148579.49 ± 0.03                | 0.05 ± 0.26                           | -0.22 ± 0.27                           | -1.00 ± 0.30                            | 0.61 ± 0.23                             |
|                                   | bad  | -148579.45 ± 0.03                | -0.38 ± 0.21                          | -0.47 ± 0.25                           | -0.89 ± 0.30                            | -0.34 ± 0.39                            |
|                                   | badq | -148576.82 ± 0.03                | -0.35 ± 0.24                          | -0.43 ± 0.33                           | -1.16 ± 0.37                            | 0.39 ± 0.29                             |
| CH <sub>3</sub> OH                |      | -72530.37 ± 0.03                 | 0.33 ± 0.26                           | 0.28 ± 0.52                            | -1.15 ± 0.50                            | 1.89 ± 0.25                             |
|                                   | b    | -72530.81 ± 0.03                 | -0.15 ± 0.21                          | -0.03 ± 0.27                           | -1.51 ± 0.17                            | 1.57 ± 0.22                             |
|                                   | ba   | -72530.76 ± 0.03                 | 0.03 ± 0.26                           | -0.28 ± 0.51                           | -1.55 ± 0.43                            | 0.94 ± 0.37                             |
|                                   | bad  | -72530.78 ± 0.03                 | -0.27 ± 0.22                          | -0.17 ± 0.39                           | -1.52 ± 0.41                            | 1.31 ± 0.19                             |
|                                   | badq | -72530.61 ± 0.03                 | -0.33 ± 0.29                          | -0.63 ± 0.38                           | -1.50 ± 0.22                            | -0.60 ± 0.49                            |
| C <sub>2</sub> H <sub>6</sub>     |      | -50024.16 ± 0.02                 | -0.05 ± 0.14                          | -0.06 ± 0.13                           | -0.09 ± 0.16                            | -0.45 ± 0.31                            |
|                                   | b    | -50024.32 ± 0.01                 | 0.16 ± 0.15                           | 0.08 ± 0.17                            | -0.30 ± 0.11                            | 0.14 ± 0.24                             |
|                                   | ba   | -50024.08 ± 0.01                 | 0.00 ± 0.09                           | -0.02 ± 0.11                           | -0.28 ± 0.06                            | 0.08 ± 0.18                             |
|                                   | bad  | -50024.17 ± 0.01                 | 0.00 ± 0.10                           | -0.02 ± 0.10                           | -0.27 ± 0.05                            | -0.01 ± 0.23                            |
|                                   | badq | -50024.33 ± 0.01                 | 0.06 ± 0.14                           | -0.01 ± 0.09                           | -0.26 ± 0.06                            | 0.10 ± 0.11                             |
| (CH <sub>2</sub> ) <sub>4</sub> O |      | -145701.53 ± 0.05                | 0.22 ± 0.60                           | 0.40 ± 0.74                            | 0.15 ± 0.56                             | 0.92 ± 0.55                             |
|                                   | b    | -145701.13 ± 0.05                | -0.50 ± 0.63                          | -0.31 ± 0.70                           | -0.45 ± 0.56                            | 0.73 ± 0.52                             |

Continued on next page



Table 22 – *Continued from previous page*

| Molec.                                        | MM'  | $\Delta G_{\text{TI3}}^{N_i=11}$ | $\Delta \Delta G_{\text{TI}}^{N_i=2}$ | $\Delta \Delta G_{\text{BAR}}^{N_i=2}$ | $\Delta \Delta G_{\text{IEXP}}^{N_i=1}$ | $\Delta \Delta G_{\text{DEXP}}^{N_i=1}$ |
|-----------------------------------------------|------|----------------------------------|---------------------------------------|----------------------------------------|-----------------------------------------|-----------------------------------------|
| C(NH <sub>2</sub> ) <sub>3</sub> <sup>+</sup> | ba   | -145699.24 ± 0.03                | -0.29 ± 0.30                          | 0.20 ± 0.54                            | -0.64 ± 0.53                            | 1.49 ± 0.35                             |
|                                               | bad  | -145700.24 ± 0.03                | -0.68 ± 0.35                          | -0.62 ± 0.49                           | -0.91 ± 0.52                            | 0.17 ± 0.41                             |
|                                               | badq | -145684.45 ± 0.03                | 0.62 ± 0.35                           | 0.06 ± 0.31                            | -1.08 ± 0.18                            | 1.06 ± 0.29                             |
|                                               | b    | -128902.19 ± 0.05                | 2.59 ± 0.68                           | 0.25 ± 0.62                            | -2.88 ± 0.26                            | 3.35 ± 0.56                             |
|                                               | b    | -128907.35 ± 0.05                | 1.30 ± 0.71                           | -0.15 ± 0.50                           | -1.20 ± 0.27                            | -1.44 ± 0.56                            |
|                                               | ba   | -128933.28 ± 0.04                | 1.23 ± 0.60                           | 0.23 ± 0.39                            | -0.74 ± 0.35                            | 1.16 ± 0.36                             |
| C <sub>6</sub> H <sub>5</sub> NH <sub>2</sub> | bad  | -128936.23 ± 0.04                | 0.39 ± 0.37                           | -0.12 ± 0.33                           | -0.58 ± 0.34                            | 0.13 ± 0.39                             |
|                                               | badq | -128918.95 ± 0.04                | 0.19 ± 0.38                           | 0.14 ± 0.45                            | -0.46 ± 0.41                            | 0.36 ± 0.51                             |
|                                               | b    | -180230.53 ± 0.04                | -0.08 ± 0.40                          | 0.27 ± 0.72                            | -1.51 ± 0.55                            | 2.12 ± 0.50                             |
|                                               | b    | -180230.55 ± 0.04                | -0.21 ± 0.41                          | 0.02 ± 0.62                            | -0.63 ± 0.56                            | 0.93 ± 0.28                             |
|                                               | ba   | -180233.99 ± 0.04                | -1.02 ± 0.34                          | -0.56 ± 0.46                           | -1.73 ± 0.49                            | 0.94 ± 0.19                             |
|                                               | bad  | -180233.04 ± 0.04                | -0.38 ± 0.41                          | -0.22 ± 0.55                           | -1.64 ± 0.47                            | 1.32 ± 0.38                             |
| CH <sub>3</sub> CONH <sub>2</sub>             | badq | -180262.07 ± 0.07                | -0.42 ± 0.84                          | 0.58 ± 0.54                            | -1.79 ± 0.41                            | 2.96 ± 0.38                             |
|                                               | b    | -131079.14 ± 0.05                | 0.56 ± 0.35                           | 0.37 ± 0.63                            | -1.86 ± 0.35                            | 2.51 ± 0.54                             |
|                                               | b    | -131078.83 ± 0.04                | 0.42 ± 0.34                           | 0.65 ± 0.41                            | -1.70 ± 0.35                            | 3.02 ± 0.23                             |
|                                               | ba   | -131083.77 ± 0.04                | -0.40 ± 0.24                          | -0.60 ± 0.33                           | -1.76 ± 0.19                            | 0.40 ± 0.31                             |
|                                               | bad  | -131084.84 ± 0.04                | -0.22 ± 0.23                          | -0.32 ± 0.29                           | -1.73 ± 0.19                            | 1.06 ± 0.25                             |
|                                               | badq | -131071.30 ± 0.03                | 0.45 ± 0.28                           | 0.09 ± 0.29                            | -0.89 ± 0.17                            | 0.86 ± 0.29                             |
| H <sub>2</sub> O                              | b    | -47896.99 ± 0.03                 | 0.48 ± 0.27                           | 0.61 ± 0.26                            | -0.40 ± 0.23                            | 1.70 ± 0.16                             |
|                                               | b    | -47897.87 ± 0.03                 | 0.44 ± 0.33                           | 0.27 ± 0.36                            | 0.11 ± 0.41                             | 0.77 ± 0.36                             |
|                                               | ba   | -47898.10 ± 0.03                 | 0.10 ± 0.27                           | 0.21 ± 0.31                            | 0.30 ± 0.43                             | 0.51 ± 0.39                             |
|                                               | bad  | -47898.10 ± 0.03                 | 0.10 ± 0.27                           | 0.21 ± 0.31                            | 0.30 ± 0.43                             | 0.51 ± 0.39                             |
|                                               | badq | -47897.84 ± 0.03                 | 0.24 ± 0.27                           | 0.34 ± 0.32                            | 0.29 ± 0.42                             | 0.89 ± 0.27                             |
| C <sub>2</sub> H <sub>5</sub> OH              |      | -97165.69 ± 0.04                 | -0.32 ± 0.35                          | -0.18 ± 0.59                           | -1.20 ± 0.42                            | 0.33 ± 0.51                             |

*Continued on next page*

Table 22 – *Continued from previous page*

| Molec.                          | MM'  | $\Delta G_{\text{TI3}}^{N_{\lambda}=11}$ | $\Delta\Delta G_{\text{TI}}^{N_{\lambda}=2}$ | $\Delta\Delta G_{\text{BAR}}^{N_{\lambda}=2}$ | $\Delta\Delta G_{\text{IEXP}}^{N_{\lambda}=1}$ | $\Delta\Delta G_{\text{DEXP}}^{N_{\lambda}=1}$ |
|---------------------------------|------|------------------------------------------|----------------------------------------------|-----------------------------------------------|------------------------------------------------|------------------------------------------------|
|                                 | b    | $-97165.97 \pm 0.04$                     | $-0.09 \pm 0.31$                             | $0.17 \pm 0.60$                               | $-1.21 \pm 0.51$                               | $1.53 \pm 0.39$                                |
|                                 | ba   | $-97166.30 \pm 0.04$                     | $0.16 \pm 0.34$                              | $-0.14 \pm 0.44$                              | $-1.08 \pm 0.34$                               | $0.66 \pm 0.40$                                |
|                                 | bad  | $-97166.59 \pm 0.04$                     | $-0.08 \pm 0.33$                             | $-0.26 \pm 0.47$                              | $-1.11 \pm 0.33$                               | $-0.05 \pm 0.50$                               |
|                                 | badq | $-97165.26 \pm 0.03$                     | $-0.02 \pm 0.34$                             | $-0.14 \pm 0.32$                              | $-1.12 \pm 0.31$                               | $0.89 \pm 0.23$                                |
| $\text{C}_6\text{H}_6$          |      | $-145560.94 \pm 0.02$                    | $-0.16 \pm 0.22$                             | $-0.16 \pm 0.26$                              | $-0.69 \pm 0.28$                               | $0.34 \pm 0.27$                                |
|                                 | b    | $-145561.20 \pm 0.02$                    | $-0.05 \pm 0.18$                             | $0.05 \pm 0.21$                               | $-0.39 \pm 0.24$                               | $0.63 \pm 0.19$                                |
|                                 | ba   | $-145564.93 \pm 0.02$                    | $-0.19 \pm 0.18$                             | $-0.17 \pm 0.18$                              | $-0.41 \pm 0.20$                               | $0.10 \pm 0.19$                                |
|                                 | bad  | $-145563.51 \pm 0.02$                    | $-0.41 \pm 0.19$                             | $-0.36 \pm 0.19$                              | $-0.44 \pm 0.19$                               | $-0.55 \pm 0.28$                               |
|                                 | badq | $-145563.88 \pm 0.02$                    | $-0.17 \pm 0.18$                             | $-0.10 \pm 0.20$                              | $-0.38 \pm 0.18$                               | $0.01 \pm 0.30$                                |
| $\text{C}_6\text{H}_5\text{OH}$ |      | $-192696.13 \pm 0.03$                    | $0.59 \pm 0.34$                              | $0.52 \pm 0.34$                               | $-0.56 \pm 0.36$                               | $1.76 \pm 0.20$                                |
|                                 | b    | $-192696.41 \pm 0.04$                    | $0.08 \pm 0.28$                              | $0.29 \pm 0.31$                               | $0.53 \pm 0.51$                                | $1.02 \pm 0.24$                                |
|                                 | ba   | $-192700.83 \pm 0.03$                    | $0.35 \pm 0.42$                              | $0.26 \pm 0.35$                               | $1.45 \pm 0.55$                                | $-0.72 \pm 0.55$                               |
|                                 | bad  | $-192699.26 \pm 0.03$                    | $0.70 \pm 0.32$                              | $0.80 \pm 0.42$                               | $1.39 \pm 0.55$                                | $1.39 \pm 0.42$                                |
|                                 | badq | $-192711.46 \pm 0.06$                    | $0.57 \pm 0.52$                              | $2.79 \pm 0.66$                               | $-0.07 \pm 0.53$                               | $5.68 \pm 0.39$                                |

Table 23: MM-to-QM aqueous-phase solvation free energy correction values from 3- $\lambda$  states simulated for 20 ps

| Molec.                                       | MM'  | $\Delta G_{\text{TI3}}^{N_\lambda=11}$ | $\Delta\Delta G_{\text{TI}}^{N_\lambda=3}$ | $\Delta\Delta G_{\text{BAR}}^{N_\lambda=3}$ | $\Delta\Delta G_{\text{IEXP}}^{N_\lambda=2}$ | $\Delta\Delta G_{\text{DEXP}}^{N_\lambda=2}$ |
|----------------------------------------------|------|----------------------------------------|--------------------------------------------|---------------------------------------------|----------------------------------------------|----------------------------------------------|
| CO <sub>3</sub> <sup>2-</sup>                |      | -165240.53 ± 0.11                      | 1.78 ± 1.21                                | 1.83 ± 0.75                                 | -3.19 ± 0.54                                 | 6.83 ± 0.59                                  |
|                                              | b    | -165222.41 ± 0.06                      | 0.65 ± 0.38                                | 0.19 ± 0.40                                 | -1.62 ± 0.28                                 | 1.69 ± 0.42                                  |
|                                              | ba   | -165287.40 ± 0.05                      | -0.60 ± 0.46                               | -0.78 ± 0.39                                | -1.66 ± 0.34                                 | -0.26 ± 0.48                                 |
|                                              | bad  | -165339.45 ± 0.05                      | -0.17 ± 0.43                               | -0.22 ± 0.35                                | -1.89 ± 0.30                                 | 1.24 ± 0.36                                  |
|                                              | badq | -165328.69 ± 0.05                      | -0.17 ± 0.38                               | -0.08 ± 0.48                                | -1.51 ± 0.31                                 | 0.40 ± 0.62                                  |
| CH <sub>3</sub> NH <sub>3</sub> <sup>+</sup> |      | -60348.42 ± 0.04                       | -0.24 ± 0.29                               | -0.25 ± 0.25                                | -0.32 ± 0.38                                 | 0.04 ± 0.29                                  |
|                                              | b    | -60352.99 ± 0.02                       | 0.23 ± 0.18                                | 0.15 ± 0.13                                 | 0.11 ± 0.19                                  | 0.16 ± 0.17                                  |
|                                              | ba   | -60355.28 ± 0.01                       | 0.32 ± 0.17                                | 0.26 ± 0.13                                 | 0.25 ± 0.16                                  | 0.19 ± 0.18                                  |
|                                              | bad  | -60355.56 ± 0.02                       | 0.01 ± 0.10                                | 0.02 ± 0.09                                 | -0.07 ± 0.13                                 | 0.15 ± 0.09                                  |
|                                              | badq | -60351.61 ± 0.01                       | -0.01 ± 0.11                               | -0.01 ± 0.09                                | -0.07 ± 0.13                                 | 0.06 ± 0.11                                  |
| NH <sub>4</sub> <sup>+</sup>                 |      | -35650.57 ± 0.04                       | -0.29 ± 0.35                               | -0.11 ± 0.25                                | -0.58 ± 0.29                                 | 0.14 ± 0.30                                  |
|                                              | b    | -35656.79 ± 0.01                       | 0.03 ± 0.04                                | 0.02 ± 0.04                                 | 0.01 ± 0.05                                  | 0.02 ± 0.06                                  |
|                                              | ba   | -35657.95 ± 0.01                       | -0.06 ± 0.06                               | -0.06 ± 0.05                                | -0.04 ± 0.08                                 | -0.07 ± 0.07                                 |
|                                              | bad  | -35657.95 ± 0.01                       | -0.06 ± 0.06                               | -0.06 ± 0.05                                | -0.04 ± 0.08                                 | -0.07 ± 0.07                                 |
|                                              | badq | -35657.18 ± 0.01                       | -0.02 ± 0.08                               | -0.01 ± 0.05                                | -0.02 ± 0.08                                 | 0.00 ± 0.08                                  |
| CH <sub>3</sub> CO <sub>2</sub> <sup>-</sup> |      | -143235.31 ± 0.07                      | 0.45 ± 0.62                                | 0.28 ± 0.57                                 | -2.14 ± 0.51                                 | 2.67 ± 0.53                                  |
|                                              | b    | -143222.40 ± 0.05                      | -0.10 ± 0.51                               | -0.35 ± 0.37                                | -0.37 ± 0.56                                 | 0.04 ± 0.42                                  |
|                                              | ba   | -143272.32 ± 0.04                      | -0.54 ± 0.27                               | -0.60 ± 0.28                                | -1.18 ± 0.31                                 | -0.11 ± 0.35                                 |
|                                              | bad  | -143277.15 ± 0.04                      | 0.39 ± 0.35                                | 0.17 ± 0.31                                 | -0.41 ± 0.34                                 | 0.93 ± 0.27                                  |
|                                              | badq | -143305.89 ± 0.06                      | -0.42 ± 0.49                               | -0.35 ± 0.60                                | -0.61 ± 0.63                                 | -0.15 ± 0.60                                 |
| H <sub>3</sub> O <sup>+</sup>                |      | -48062.72 ± 0.05                       | 0.65 ± 0.52                                | 0.53 ± 0.36                                 | -0.19 ± 0.28                                 | -0.88 ± 0.67                                 |
|                                              | b    | -48067.54 ± 0.04                       | -0.66 ± 0.38                               | -0.44 ± 0.28                                | -0.53 ± 0.29                                 | -0.95 ± 0.51                                 |
|                                              | ba   | -48070.58 ± 0.01                       | 0.05 ± 0.11                                | 0.06 ± 0.08                                 | 0.10 ± 0.11                                  | 0.05 ± 0.09                                  |

*Continued on next page*

Table 23 – *Continued from previous page*

| Molec.                           | MM'  | $\Delta G_{\text{TI3}}^{N_i=11}$ | $\Delta\Delta G_{\text{TI}}^{N_i=3}$ | $\Delta\Delta G_{\text{BAR}}^{N_i=3}$ | $\Delta\Delta G_{\text{IEXP}}^{N_i=2}$ | $\Delta\Delta G_{\text{DEXP}}^{N_i=2}$ |
|----------------------------------|------|----------------------------------|--------------------------------------|---------------------------------------|----------------------------------------|----------------------------------------|
| C <sub>6</sub> H <sub>5</sub> Cl | bad  | -48070.58 ± 0.01                 | 0.05 ± 0.11                          | 0.06 ± 0.08                           | 0.10 ± 0.11                            | 0.05 ± 0.09                            |
|                                  | badq | -48070.60 ± 0.01                 | -0.10 ± 0.11                         | -0.10 ± 0.09                          | 0.03 ± 0.12                            | -0.22 ± 0.12                           |
|                                  |      | -433851.87 ± 0.03                | 0.13 ± 0.21                          | 0.16 ± 0.22                           | 0.02 ± 0.32                            | 0.64 ± 0.23                            |
|                                  | b    | -433850.81 ± 0.04                | -0.14 ± 0.23                         | -0.09 ± 0.22                          | -0.20 ± 0.24                           | -0.09 ± 0.34                           |
|                                  | ba   | -433854.43 ± 0.03                | 0.13 ± 0.18                          | 0.09 ± 0.15                           | 0.02 ± 0.18                            | 0.19 ± 0.17                            |
|                                  | bad  | -433856.05 ± 0.03                | 0.09 ± 0.22                          | 0.11 ± 0.19                           | -0.05 ± 0.30                           | 0.33 ± 0.27                            |
| C <sub>6</sub> H <sub>14</sub>   | badq | -433860.24 ± 0.04                | 0.29 ± 0.24                          | 0.28 ± 0.24                           | 0.04 ± 0.25                            | 0.34 ± 0.33                            |
|                                  |      | -148579.99 ± 0.03                | -0.34 ± 0.23                         | -0.32 ± 0.19                          | -0.76 ± 0.23                           | -0.21 ± 0.32                           |
|                                  | b    | -148580.59 ± 0.03                | -0.21 ± 0.22                         | -0.24 ± 0.17                          | -0.42 ± 0.22                           | -0.27 ± 0.26                           |
|                                  | ba   | -148579.49 ± 0.03                | -0.11 ± 0.20                         | -0.13 ± 0.17                          | -0.58 ± 0.17                           | 0.19 ± 0.21                            |
|                                  | bad  | -148579.45 ± 0.03                | -0.38 ± 0.27                         | -0.41 ± 0.16                          | -0.42 ± 0.18                           | -0.43 ± 0.25                           |
|                                  | badq | -148576.82 ± 0.03                | -0.46 ± 0.30                         | -0.41 ± 0.22                          | -0.71 ± 0.27                           | -0.36 ± 0.33                           |
| CH <sub>3</sub> OH               |      | -72530.37 ± 0.03                 | 0.04 ± 0.29                          | 0.05 ± 0.25                           | -0.45 ± 0.40                           | 0.75 ± 0.22                            |
|                                  | b    | -72530.81 ± 0.03                 | -0.01 ± 0.38                         | -0.07 ± 0.25                          | -0.13 ± 0.38                           | 0.40 ± 0.25                            |
|                                  | ba   | -72530.76 ± 0.03                 | 0.51 ± 0.45                          | 0.44 ± 0.33                           | 0.09 ± 0.35                            | -0.01 ± 0.52                           |
|                                  | bad  | -72530.78 ± 0.03                 | 0.36 ± 0.27                          | 0.25 ± 0.25                           | -0.36 ± 0.28                           | 0.61 ± 0.37                            |
|                                  | badq | -72530.61 ± 0.03                 | -0.33 ± 0.29                         | -0.38 ± 0.21                          | -0.65 ± 0.26                           | -0.42 ± 0.36                           |
|                                  |      | -50024.16 ± 0.02                 | -0.08 ± 0.21                         | -0.07 ± 0.13                          | 0.07 ± 0.15                            | -0.34 ± 0.23                           |
| C <sub>2</sub> H <sub>6</sub>    | b    | -50024.32 ± 0.01                 | 0.33 ± 0.14                          | 0.28 ± 0.10                           | 0.14 ± 0.13                            | 0.35 ± 0.15                            |
|                                  | ba   | -50024.08 ± 0.01                 | 0.11 ± 0.14                          | 0.07 ± 0.09                           | 0.06 ± 0.15                            | 0.10 ± 0.13                            |
|                                  | bad  | -50024.17 ± 0.01                 | 0.10 ± 0.12                          | 0.08 ± 0.08                           | -0.01 ± 0.08                           | 0.08 ± 0.14                            |
|                                  | badq | -50024.33 ± 0.01                 | 0.10 ± 0.11                          | 0.08 ± 0.08                           | -0.02 ± 0.09                           | 0.12 ± 0.10                            |
|                                  |      | -145701.53 ± 0.05                | 1.06 ± 0.46                          | 0.88 ± 0.42                           | 1.70 ± 0.73                            | 1.42 ± 0.46                            |
|                                  | b    | -145701.13 ± 0.05                | 0.11 ± 0.45                          | -0.14 ± 0.39                          | 0.20 ± 0.62                            | 0.37 ± 0.43                            |

*Continued on next page*

Table 23 – *Continued from previous page*

| Molec.                            | MM'  | $\Delta G_{\text{TI3}}^{N_i=11}$ | $\Delta\Delta G_{\text{TI}}^{N_i=3}$ | $\Delta\Delta G_{\text{BAR}}^{N_i=3}$ | $\Delta\Delta G_{\text{IEXP}}^{N_i=2}$ | $\Delta\Delta G_{\text{DEXP}}^{N_i=2}$ |
|-----------------------------------|------|----------------------------------|--------------------------------------|---------------------------------------|----------------------------------------|----------------------------------------|
|                                   | ba   | -145699.24 ± 0.03                | 0.12 ± 0.24                          | 0.08 ± 0.24                           | -0.39 ± 0.37                           | 0.89 ± 0.22                            |
|                                   | bad  | -145700.24 ± 0.03                | -0.43 ± 0.26                         | -0.48 ± 0.23                          | -0.78 ± 0.37                           | -0.03 ± 0.29                           |
|                                   | badq | -145684.45 ± 0.03                | -0.18 ± 0.27                         | -0.17 ± 0.24                          | -0.54 ± 0.33                           | 0.25 ± 0.24                            |
| $\text{C}(\text{NH}_2)_3^+$       |      | -128902.19 ± 0.05                | 0.87 ± 0.57                          | 0.92 ± 0.51                           | -0.19 ± 0.44                           | 1.53 ± 0.56                            |
|                                   | b    | -128907.35 ± 0.05                | 0.44 ± 0.55                          | 0.40 ± 0.30                           | -0.15 ± 0.28                           | -1.96 ± 0.74                           |
|                                   | ba   | -128933.28 ± 0.04                | 0.38 ± 0.45                          | 0.18 ± 0.26                           | 0.30 ± 0.44                            | 0.17 ± 0.36                            |
|                                   | bad  | -128936.23 ± 0.04                | -0.35 ± 0.25                         | -0.35 ± 0.27                          | -0.61 ± 0.40                           | -0.20 ± 0.30                           |
|                                   | badq | -128918.95 ± 0.04                | 0.30 ± 0.32                          | 0.21 ± 0.26                           | 0.16 ± 0.28                            | 0.44 ± 0.35                            |
| $\text{C}_6\text{H}_5\text{NH}_2$ |      | -180230.53 ± 0.04                | -0.21 ± 0.25                         | -0.21 ± 0.33                          | -1.26 ± 0.41                           | 1.01 ± 0.40                            |
|                                   | b    | -180230.55 ± 0.04                | -0.47 ± 0.39                         | -0.49 ± 0.33                          | -0.56 ± 0.56                           | 0.09 ± 0.28                            |
|                                   | ba   | -180233.99 ± 0.04                | 0.07 ± 0.42                          | -0.21 ± 0.29                          | -0.23 ± 0.38                           | 0.26 ± 0.26                            |
|                                   | bad  | -180233.04 ± 0.04                | -0.86 ± 0.29                         | -0.80 ± 0.25                          | -1.51 ± 0.32                           | -0.08 ± 0.35                           |
|                                   | badq | -180262.07 ± 0.07                | -0.16 ± 0.46                         | 0.11 ± 0.44                           | -0.79 ± 0.45                           | 1.46 ± 0.35                            |
| $\text{CH}_3\text{CONH}_2$        |      | -131079.14 ± 0.05                | 1.12 ± 0.31                          | 1.07 ± 0.32                           | -0.21 ± 0.25                           | 1.84 ± 0.49                            |
|                                   | b    | -131078.83 ± 0.04                | -0.49 ± 0.39                         | -0.30 ± 0.30                          | -0.90 ± 0.38                           | 0.65 ± 0.22                            |
|                                   | ba   | -131083.77 ± 0.04                | 0.15 ± 0.31                          | 0.00 ± 0.21                           | -0.31 ± 0.25                           | 0.28 ± 0.27                            |
|                                   | bad  | -131084.84 ± 0.04                | -0.10 ± 0.21                         | -0.15 ± 0.18                          | -0.74 ± 0.26                           | 0.52 ± 0.19                            |
|                                   | badq | -131071.30 ± 0.03                | -0.38 ± 0.30                         | -0.23 ± 0.21                          | -0.61 ± 0.21                           | -0.30 ± 0.37                           |
| $\text{H}_2\text{O}$              |      | -47896.99 ± 0.03                 | 0.32 ± 0.31                          | 0.33 ± 0.21                           | 0.27 ± 0.31                            | 0.73 ± 0.19                            |
|                                   | b    | -47897.87 ± 0.03                 | 0.52 ± 0.28                          | 0.41 ± 0.21                           | 0.47 ± 0.36                            | 0.67 ± 0.24                            |
|                                   | ba   | -47898.10 ± 0.03                 | -0.33 ± 0.21                         | -0.26 ± 0.18                          | -0.28 ± 0.29                           | -0.01 ± 0.22                           |
|                                   | bad  | -47898.10 ± 0.03                 | -0.33 ± 0.21                         | -0.26 ± 0.18                          | -0.28 ± 0.29                           | -0.01 ± 0.22                           |
|                                   | badq | -47897.84 ± 0.03                 | -0.16 ± 0.23                         | -0.09 ± 0.18                          | -0.15 ± 0.29                           | 0.18 ± 0.21                            |
| $\text{C}_2\text{H}_5\text{OH}$   |      | -97165.69 ± 0.04                 | 0.08 ± 0.29                          | 0.03 ± 0.28                           | -0.30 ± 0.29                           | 0.43 ± 0.32                            |

*Continued on next page*

Table 23 – *Continued from previous page*

| Molec.                          | MM'  | $\Delta G_{\text{TI3}}^{N_i=11}$ | $\Delta\Delta G_{\text{TI}}^{N_i=3}$ | $\Delta\Delta G_{\text{BAR}}^{N_i=3}$ | $\Delta\Delta G_{\text{IEXP}}^{N_i=2}$ | $\Delta\Delta G_{\text{DEXP}}^{N_i=2}$ |
|---------------------------------|------|----------------------------------|--------------------------------------|---------------------------------------|----------------------------------------|----------------------------------------|
|                                 | b    | $-97165.97 \pm 0.04$             | $0.89 \pm 0.23$                      | $0.77 \pm 0.33$                       | $0.05 \pm 0.43$                        | $1.58 \pm 0.23$                        |
|                                 | ba   | $-97166.30 \pm 0.04$             | $0.07 \pm 0.26$                      | $0.04 \pm 0.26$                       | $-0.47 \pm 0.31$                       | $0.45 \pm 0.29$                        |
|                                 | bad  | $-97166.59 \pm 0.04$             | $0.31 \pm 0.41$                      | $0.16 \pm 0.27$                       | $0.40 \pm 0.44$                        | $0.13 \pm 0.37$                        |
|                                 | badq | $-97165.26 \pm 0.03$             | $0.58 \pm 0.32$                      | $0.42 \pm 0.27$                       | $0.09 \pm 0.26$                        | $0.58 \pm 0.39$                        |
| $\text{C}_6\text{H}_6$          |      | $-145560.94 \pm 0.02$            | $-0.17 \pm 0.21$                     | $-0.17 \pm 0.16$                      | $-0.33 \pm 0.24$                       | $0.07 \pm 0.19$                        |
|                                 | b    | $-145561.20 \pm 0.02$            | $0.12 \pm 0.17$                      | $0.09 \pm 0.13$                       | $-0.06 \pm 0.19$                       | $0.37 \pm 0.13$                        |
|                                 | ba   | $-145564.93 \pm 0.02$            | $0.14 \pm 0.21$                      | $0.06 \pm 0.15$                       | $0.09 \pm 0.21$                        | $0.14 \pm 0.16$                        |
|                                 | bad  | $-145563.51 \pm 0.02$            | $0.19 \pm 0.16$                      | $0.09 \pm 0.12$                       | $0.05 \pm 0.15$                        | $0.05 \pm 0.19$                        |
|                                 | badq | $-145563.88 \pm 0.02$            | $0.12 \pm 0.16$                      | $0.08 \pm 0.12$                       | $-0.03 \pm 0.16$                       | $0.18 \pm 0.17$                        |
| $\text{C}_6\text{H}_5\text{OH}$ |      | $-192696.13 \pm 0.03$            | $0.94 \pm 0.37$                      | $0.85 \pm 0.28$                       | $0.50 \pm 0.31$                        | $0.81 \pm 0.46$                        |
|                                 | b    | $-192696.41 \pm 0.04$            | $0.25 \pm 0.31$                      | $0.18 \pm 0.21$                       | $0.51 \pm 0.39$                        | $0.48 \pm 0.18$                        |
|                                 | ba   | $-192700.83 \pm 0.03$            | $0.50 \pm 0.28$                      | $0.39 \pm 0.20$                       | $0.82 \pm 0.48$                        | $0.17 \pm 0.41$                        |
|                                 | bad  | $-192699.26 \pm 0.03$            | $0.46 \pm 0.19$                      | $0.48 \pm 0.19$                       | $0.46 \pm 0.42$                        | $0.99 \pm 0.23$                        |
|                                 | badq | $-192711.46 \pm 0.06$            | $-0.04 \pm 0.44$                     | $0.33 \pm 0.43$                       | $-0.23 \pm 0.47$                       | $2.22 \pm 0.35$                        |

Table 24: MM-to-QM aqueous-phase solvation free energy correction values from 6- $\lambda$  states simulated for 20 ps

| Molec.                                       | MM'  | $\Delta G_{\text{TI3}}^{N_\lambda=11}$ | $\Delta\Delta G_{\text{TI}}^{N_\lambda=6}$ | $\Delta\Delta G_{\text{BAR}}^{N_\lambda=6}$ | $\Delta\Delta G_{\text{IEXP}}^{N_\lambda=5}$ | $\Delta\Delta G_{\text{DEXP}}^{N_\lambda=5}$ |
|----------------------------------------------|------|----------------------------------------|--------------------------------------------|---------------------------------------------|----------------------------------------------|----------------------------------------------|
| CO <sub>3</sub> <sup>2-</sup>                |      | -165240.53 ± 0.11                      | 0.60 ± 0.67                                | 0.65 ± 0.49                                 | -0.63 ± 0.54                                 | 1.66 ± 0.54                                  |
|                                              | b    | -165222.41 ± 0.06                      | 0.65 ± 0.33                                | 0.63 ± 0.26                                 | 0.18 ± 0.32                                  | 0.88 ± 0.34                                  |
|                                              | ba   | -165287.40 ± 0.05                      | 0.05 ± 0.31                                | 0.12 ± 0.25                                 | -0.23 ± 0.31                                 | 0.15 ± 0.36                                  |
|                                              | bad  | -165339.45 ± 0.05                      | -0.69 ± 0.29                               | -0.64 ± 0.23                                | -1.12 ± 0.29                                 | -0.27 ± 0.32                                 |
|                                              | badq | -165328.69 ± 0.05                      | 0.13 ± 0.27                                | 0.15 ± 0.21                                 | -0.23 ± 0.28                                 | 0.50 ± 0.30                                  |
| CH <sub>3</sub> NH <sub>3</sub> <sup>+</sup> |      | -60348.42 ± 0.04                       | 0.04 ± 0.22                                | 0.03 ± 0.16                                 | 0.05 ± 0.24                                  | 0.06 ± 0.21                                  |
|                                              | b    | -60352.99 ± 0.02                       | 0.05 ± 0.13                                | 0.03 ± 0.09                                 | 0.05 ± 0.14                                  | 0.01 ± 0.13                                  |
|                                              | ba   | -60355.28 ± 0.01                       | 0.07 ± 0.11                                | 0.06 ± 0.08                                 | 0.06 ± 0.12                                  | 0.04 ± 0.12                                  |
|                                              | bad  | -60355.56 ± 0.02                       | 0.02 ± 0.10                                | 0.04 ± 0.07                                 | 0.03 ± 0.10                                  | 0.04 ± 0.09                                  |
|                                              | badq | -60351.61 ± 0.01                       | -0.09 ± 0.08                               | -0.09 ± 0.06                                | -0.11 ± 0.09                                 | -0.06 ± 0.08                                 |
| NH <sub>4</sub> <sup>+</sup>                 |      | -35650.57 ± 0.04                       | 0.27 ± 0.23                                | 0.22 ± 0.16                                 | 0.31 ± 0.29                                  | 0.35 ± 0.18                                  |
|                                              | b    | -35656.79 ± 0.01                       | -0.03 ± 0.04                               | -0.03 ± 0.03                                | -0.03 ± 0.03                                 | -0.03 ± 0.04                                 |
|                                              | ba   | -35657.95 ± 0.01                       | -0.02 ± 0.04                               | -0.02 ± 0.03                                | -0.02 ± 0.04                                 | -0.03 ± 0.04                                 |
|                                              | bad  | -35657.95 ± 0.01                       | -0.02 ± 0.04                               | -0.02 ± 0.03                                | -0.02 ± 0.04                                 | -0.03 ± 0.04                                 |
|                                              | badq | -35657.18 ± 0.01                       | -0.01 ± 0.05                               | -0.01 ± 0.03                                | -0.01 ± 0.05                                 | 0.00 ± 0.05                                  |
| CH <sub>3</sub> CO <sub>2</sub> <sup>-</sup> |      | -143235.31 ± 0.07                      | 1.05 ± 0.44                                | 0.92 ± 0.33                                 | 0.46 ± 0.44                                  | 1.62 ± 0.40                                  |
|                                              | b    | -143222.40 ± 0.05                      | 0.15 ± 0.27                                | 0.14 ± 0.21                                 | -0.14 ± 0.26                                 | 0.33 ± 0.26                                  |
|                                              | ba   | -143272.32 ± 0.04                      | -0.12 ± 0.21                               | -0.18 ± 0.19                                | -0.32 ± 0.26                                 | 0.02 ± 0.25                                  |
|                                              | bad  | -143277.15 ± 0.04                      | 0.37 ± 0.26                                | 0.35 ± 0.18                                 | 0.23 ± 0.24                                  | 0.49 ± 0.24                                  |
|                                              | badq | -143305.89 ± 0.06                      | -0.39 ± 0.27                               | -0.37 ± 0.23                                | -0.93 ± 0.31                                 | -0.01 ± 0.39                                 |
| H <sub>3</sub> O <sup>+</sup>                |      | -48062.72 ± 0.05                       | 0.36 ± 0.34                                | 0.32 ± 0.25                                 | 0.57 ± 0.36                                  | 0.01 ± 0.35                                  |
|                                              | b    | -48067.54 ± 0.04                       | 0.43 ± 0.25                                | 0.42 ± 0.18                                 | 0.54 ± 0.25                                  | 0.30 ± 0.24                                  |
|                                              | ba   | -48070.58 ± 0.01                       | 0.04 ± 0.08                                | 0.04 ± 0.05                                 | 0.06 ± 0.08                                  | 0.03 ± 0.07                                  |

*Continued on next page*

Table 24 – *Continued from previous page*

| Molec.                          | MM'  | $\Delta G_{\text{TI3}}^{N_i=11}$ | $\Delta\Delta G_{\text{TI}}^{N_i=6}$ | $\Delta\Delta G_{\text{BAR}}^{N_i=6}$ | $\Delta\Delta G_{\text{IEXP}}^{N_i=5}$ | $\Delta\Delta G_{\text{DEXP}}^{N_i=5}$ |
|---------------------------------|------|----------------------------------|--------------------------------------|---------------------------------------|----------------------------------------|----------------------------------------|
|                                 | bad  | $-48070.58 \pm 0.01$             | $0.04 \pm 0.08$                      | $0.04 \pm 0.05$                       | $0.06 \pm 0.08$                        | $0.03 \pm 0.07$                        |
|                                 | badq | $-48070.60 \pm 0.01$             | $-0.07 \pm 0.07$                     | $-0.07 \pm 0.05$                      | $-0.02 \pm 0.08$                       | $-0.13 \pm 0.08$                       |
| $\text{C}_6\text{H}_5\text{Cl}$ |      | $-433851.87 \pm 0.03$            | $0.20 \pm 0.13$                      | $0.22 \pm 0.10$                       | $0.08 \pm 0.18$                        | $0.43 \pm 0.13$                        |
|                                 | b    | $-433850.81 \pm 0.04$            | $-0.22 \pm 0.16$                     | $-0.17 \pm 0.14$                      | $-0.21 \pm 0.16$                       | $-0.26 \pm 0.26$                       |
|                                 | ba   | $-433854.43 \pm 0.03$            | $0.16 \pm 0.14$                      | $0.14 \pm 0.10$                       | $0.14 \pm 0.14$                        | $0.16 \pm 0.13$                        |
|                                 | bad  | $-433856.05 \pm 0.03$            | $0.04 \pm 0.16$                      | $0.04 \pm 0.12$                       | $-0.04 \pm 0.16$                       | $0.06 \pm 0.20$                        |
|                                 | badq | $-433860.24 \pm 0.04$            | $0.20 \pm 0.15$                      | $0.20 \pm 0.12$                       | $0.11 \pm 0.16$                        | $0.25 \pm 0.18$                        |
| $\text{C}_6\text{H}_{14}$       |      | $-148579.99 \pm 0.03$            | $0.28 \pm 0.21$                      | $0.27 \pm 0.14$                       | $0.26 \pm 0.18$                        | $0.22 \pm 0.20$                        |
|                                 | b    | $-148580.59 \pm 0.03$            | $-0.13 \pm 0.19$                     | $-0.15 \pm 0.13$                      | $-0.04 \pm 0.21$                       | $-0.21 \pm 0.17$                       |
|                                 | ba   | $-148579.49 \pm 0.03$            | $0.07 \pm 0.16$                      | $0.06 \pm 0.12$                       | $-0.04 \pm 0.16$                       | $0.12 \pm 0.16$                        |
|                                 | bad  | $-148579.45 \pm 0.03$            | $-0.16 \pm 0.16$                     | $-0.16 \pm 0.10$                      | $-0.20 \pm 0.13$                       | $-0.19 \pm 0.17$                       |
|                                 | badq | $-148576.82 \pm 0.03$            | $-0.04 \pm 0.18$                     | $-0.05 \pm 0.14$                      | $-0.10 \pm 0.20$                       | $0.01 \pm 0.21$                        |
| $\text{CH}_3\text{OH}$          |      | $-72530.37 \pm 0.03$             | $0.19 \pm 0.22$                      | $0.17 \pm 0.15$                       | $0.07 \pm 0.25$                        | $0.32 \pm 0.20$                        |
|                                 | b    | $-72530.81 \pm 0.03$             | $-0.25 \pm 0.17$                     | $-0.25 \pm 0.12$                      | $-0.47 \pm 0.16$                       | $-0.05 \pm 0.17$                       |
|                                 | ba   | $-72530.76 \pm 0.03$             | $0.20 \pm 0.17$                      | $0.22 \pm 0.14$                       | $-0.06 \pm 0.18$                       | $0.41 \pm 0.20$                        |
|                                 | bad  | $-72530.78 \pm 0.03$             | $-0.11 \pm 0.21$                     | $-0.13 \pm 0.15$                      | $-0.17 \pm 0.23$                       | $-0.02 \pm 0.18$                       |
|                                 | badq | $-72530.61 \pm 0.03$             | $-0.24 \pm 0.20$                     | $-0.28 \pm 0.13$                      | $-0.33 \pm 0.17$                       | $-0.30 \pm 0.19$                       |
| $\text{C}_2\text{H}_6$          |      | $-50024.16 \pm 0.02$             | $-0.23 \pm 0.10$                     | $-0.22 \pm 0.07$                      | $-0.18 \pm 0.09$                       | $-0.27 \pm 0.10$                       |
|                                 | b    | $-50024.32 \pm 0.01$             | $0.15 \pm 0.08$                      | $0.15 \pm 0.06$                       | $0.09 \pm 0.07$                        | $0.18 \pm 0.09$                        |
|                                 | ba   | $-50024.08 \pm 0.01$             | $0.01 \pm 0.07$                      | $0.01 \pm 0.06$                       | $-0.02 \pm 0.07$                       | $0.03 \pm 0.08$                        |
|                                 | bad  | $-50024.17 \pm 0.01$             | $-0.09 \pm 0.08$                     | $-0.09 \pm 0.06$                      | $-0.10 \pm 0.07$                       | $-0.09 \pm 0.08$                       |
|                                 | badq | $-50024.33 \pm 0.01$             | $0.05 \pm 0.08$                      | $0.04 \pm 0.06$                       | $0.01 \pm 0.08$                        | $0.05 \pm 0.08$                        |
| $(\text{CH}_2)_4\text{O}$       |      | $-145701.53 \pm 0.05$            | $0.00 \pm 0.27$                      | $-0.01 \pm 0.24$                      | $-0.19 \pm 0.35$                       | $0.18 \pm 0.33$                        |
|                                 | b    | $-145701.13 \pm 0.05$            | $-0.19 \pm 0.28$                     | $-0.26 \pm 0.23$                      | $-0.29 \pm 0.35$                       | $-0.07 \pm 0.27$                       |

*Continued on next page*



Table 24 – *Continued from previous page*

| Molec.                            | MM'  | $\Delta G_{\text{TI3}}^{N_i=11}$ | $\Delta\Delta G_{\text{TI}}^{N_i=6}$ | $\Delta\Delta G_{\text{BAR}}^{N_i=6}$ | $\Delta\Delta G_{\text{IEXP}}^{N_i=5}$ | $\Delta\Delta G_{\text{DEXP}}^{N_i=5}$ |
|-----------------------------------|------|----------------------------------|--------------------------------------|---------------------------------------|----------------------------------------|----------------------------------------|
| $\text{C}(\text{NH}_2)_3^+$       | ba   | -145699.24 ± 0.03                | 0.16 ± 0.15                          | 0.13 ± 0.11                           | -0.13 ± 0.17                           | 0.45 ± 0.15                            |
|                                   | bad  | -145700.24 ± 0.03                | -0.72 ± 0.21                         | -0.71 ± 0.15                          | -0.75 ± 0.24                           | -0.62 ± 0.22                           |
|                                   | badq | -145684.45 ± 0.03                | 0.21 ± 0.19                          | 0.22 ± 0.14                           | 0.08 ± 0.18                            | 0.31 ± 0.19                            |
|                                   | b    | -128902.19 ± 0.05                | 0.34 ± 0.36                          | 0.35 ± 0.25                           | 0.17 ± 0.44                            | 0.47 ± 0.41                            |
|                                   | b    | -128907.35 ± 0.05                | 0.25 ± 0.27                          | 0.22 ± 0.21                           | 0.11 ± 0.25                            | 0.00 ± 0.35                            |
|                                   | ba   | -128933.28 ± 0.04                | 0.12 ± 0.20                          | 0.13 ± 0.16                           | -0.08 ± 0.19                           | 0.22 ± 0.20                            |
| $\text{C}_6\text{H}_5\text{NH}_2$ | bad  | -128936.23 ± 0.04                | -0.22 ± 0.21                         | -0.17 ± 0.15                          | -0.22 ± 0.17                           | -0.29 ± 0.24                           |
|                                   | badq | -128918.95 ± 0.04                | 0.16 ± 0.22                          | 0.13 ± 0.16                           | 0.19 ± 0.25                            | 0.19 ± 0.20                            |
|                                   | b    | -180230.53 ± 0.04                | 0.10 ± 0.27                          | 0.06 ± 0.21                           | -0.16 ± 0.27                           | 0.25 ± 0.30                            |
|                                   | b    | -180230.55 ± 0.04                | 0.01 ± 0.27                          | -0.03 ± 0.19                          | -0.07 ± 0.31                           | 0.09 ± 0.29                            |
|                                   | ba   | -180233.99 ± 0.04                | 0.10 ± 0.20                          | 0.04 ± 0.15                           | -0.12 ± 0.21                           | 0.29 ± 0.17                            |
|                                   | bad  | -180233.04 ± 0.04                | -0.12 ± 0.23                         | -0.18 ± 0.18                          | -0.26 ± 0.32                           | 0.04 ± 0.22                            |
| $\text{CH}_3\text{CONH}_2$        | badq | -180262.07 ± 0.07                | 0.32 ± 0.37                          | 0.36 ± 0.30                           | 0.28 ± 0.41                            | 0.61 ± 0.35                            |
|                                   | b    | -131079.14 ± 0.05                | 0.17 ± 0.25                          | 0.22 ± 0.22                           | -0.06 ± 0.28                           | 0.53 ± 0.28                            |
|                                   | b    | -131078.83 ± 0.04                | 0.28 ± 0.21                          | 0.28 ± 0.17                           | -0.04 ± 0.23                           | 0.58 ± 0.23                            |
|                                   | ba   | -131083.77 ± 0.04                | -0.31 ± 0.24                         | -0.32 ± 0.16                          | -0.23 ± 0.24                           | -0.37 ± 0.21                           |
|                                   | bad  | -131084.84 ± 0.04                | 0.15 ± 0.20                          | 0.16 ± 0.13                           | 0.07 ± 0.16                            | 0.27 ± 0.18                            |
|                                   | badq | -131071.30 ± 0.03                | -0.02 ± 0.19                         | 0.04 ± 0.12                           | -0.10 ± 0.15                           | -0.01 ± 0.17                           |
| $\text{H}_2\text{O}$              | b    | -47896.99 ± 0.03                 | 0.13 ± 0.21                          | 0.15 ± 0.14                           | 0.14 ± 0.18                            | 0.15 ± 0.22                            |
|                                   | b    | -47897.87 ± 0.03                 | -0.34 ± 0.21                         | -0.30 ± 0.14                          | -0.21 ± 0.26                           | -0.35 ± 0.20                           |
|                                   | ba   | -47898.10 ± 0.03                 | 0.66 ± 0.17                          | 0.64 ± 0.11                           | 0.62 ± 0.18                            | 0.66 ± 0.15                            |
|                                   | bad  | -47898.10 ± 0.03                 | 0.66 ± 0.17                          | 0.64 ± 0.11                           | 0.62 ± 0.18                            | 0.66 ± 0.15                            |
|                                   | badq | -47897.84 ± 0.03                 | 0.30 ± 0.21                          | 0.33 ± 0.16                           | 0.45 ± 0.22                            | 0.24 ± 0.26                            |
| $\text{C}_2\text{H}_5\text{OH}$   |      | -97165.69 ± 0.04                 | 0.10 ± 0.23                          | 0.09 ± 0.18                           | 0.04 ± 0.28                            | 0.16 ± 0.23                            |

*Continued on next page*

Table 24 – *Continued from previous page*

| Molec.                          | MM'  | $\Delta G_{\text{TI3}}^{N_i=11}$ | $\Delta\Delta G_{\text{TI}}^{N_i=6}$ | $\Delta\Delta G_{\text{BAR}}^{N_i=6}$ | $\Delta\Delta G_{\text{IEXP}}^{N_i=5}$ | $\Delta\Delta G_{\text{DEXP}}^{N_i=5}$ |
|---------------------------------|------|----------------------------------|--------------------------------------|---------------------------------------|----------------------------------------|----------------------------------------|
|                                 | b    | $-97165.97 \pm 0.04$             | $-0.03 \pm 0.20$                     | $-0.01 \pm 0.16$                      | $-0.20 \pm 0.24$                       | $0.17 \pm 0.21$                        |
|                                 | ba   | $-97166.30 \pm 0.04$             | $-0.55 \pm 0.20$                     | $-0.51 \pm 0.17$                      | $-0.67 \pm 0.25$                       | $-0.40 \pm 0.23$                       |
|                                 | bad  | $-97166.59 \pm 0.04$             | $-0.29 \pm 0.20$                     | $-0.29 \pm 0.15$                      | $-0.38 \pm 0.20$                       | $-0.22 \pm 0.21$                       |
|                                 | badq | $-97165.26 \pm 0.03$             | $-0.03 \pm 0.20$                     | $-0.05 \pm 0.14$                      | $-0.18 \pm 0.17$                       | $-0.03 \pm 0.22$                       |
| $\text{C}_6\text{H}_6$          |      | $-145560.94 \pm 0.02$            | $0.14 \pm 0.14$                      | $0.14 \pm 0.10$                       | $0.07 \pm 0.13$                        | $0.21 \pm 0.14$                        |
|                                 | b    | $-145561.20 \pm 0.02$            | $0.25 \pm 0.11$                      | $0.24 \pm 0.08$                       | $0.16 \pm 0.10$                        | $0.33 \pm 0.10$                        |
|                                 | ba   | $-145564.93 \pm 0.02$            | $0.07 \pm 0.13$                      | $0.06 \pm 0.10$                       | $0.09 \pm 0.15$                        | $0.07 \pm 0.13$                        |
|                                 | bad  | $-145563.51 \pm 0.02$            | $-0.12 \pm 0.12$                     | $-0.13 \pm 0.09$                      | $-0.12 \pm 0.15$                       | $-0.14 \pm 0.12$                       |
|                                 | badq | $-145563.88 \pm 0.02$            | $0.08 \pm 0.10$                      | $0.06 \pm 0.08$                       | $0.03 \pm 0.13$                        | $0.11 \pm 0.12$                        |
| $\text{C}_6\text{H}_5\text{OH}$ |      | $-192696.13 \pm 0.03$            | $0.31 \pm 0.19$                      | $0.32 \pm 0.14$                       | $0.21 \pm 0.21$                        | $0.48 \pm 0.17$                        |
|                                 | b    | $-192696.41 \pm 0.04$            | $-0.07 \pm 0.16$                     | $-0.06 \pm 0.12$                      | $-0.11 \pm 0.17$                       | $0.02 \pm 0.16$                        |
|                                 | ba   | $-192700.83 \pm 0.03$            | $0.20 \pm 0.20$                      | $0.17 \pm 0.14$                       | $0.27 \pm 0.22$                        | $0.10 \pm 0.20$                        |
|                                 | bad  | $-192699.26 \pm 0.03$            | $0.02 \pm 0.20$                      | $0.03 \pm 0.14$                       | $0.05 \pm 0.22$                        | $0.09 \pm 0.22$                        |
|                                 | badq | $-192711.46 \pm 0.06$            | $0.81 \pm 0.36$                      | $0.84 \pm 0.27$                       | $0.88 \pm 0.36$                        | $1.20 \pm 0.32$                        |

Table 25: MM-to-QM gas-phase solvation free energy correction values from 2- $\lambda$  states simulated for 200 ps

| Molec.                                       | MM'  | $\Delta G_{\text{TI3}}^{N_\lambda=11}$ | $\Delta\Delta G_{\text{TI}}^{N_\lambda=2}$ | $\Delta\Delta G_{\text{BAR}}^{N_\lambda=2}$ | $\Delta\Delta G_{\text{IEXP}}^{N_\lambda=1}$ | $\Delta\Delta G_{\text{DEXP}}^{N_\lambda=1}$ |
|----------------------------------------------|------|----------------------------------------|--------------------------------------------|---------------------------------------------|----------------------------------------------|----------------------------------------------|
| CO <sub>3</sub> <sup>2-</sup>                |      | -165234.08 ± 0.05                      | 3.11 ± 0.12                                | 2.66 ± 0.25                                 | -13.95 ± 0.13                                | 19.26 ± 0.23                                 |
|                                              | b    | -165233.97 ± 0.00                      | -0.04 ± 0.01                               | -0.05 ± 0.01                                | -0.26 ± 0.01                                 | 0.12 ± 0.02                                  |
|                                              | ba   | -165298.74 ± 0.00                      | -0.05 ± 0.01                               | -0.05 ± 0.01                                | -0.20 ± 0.01                                 | 0.06 ± 0.09                                  |
|                                              | bad  | -165350.72 ± 0.00                      | -0.04 ± 0.01                               | -0.04 ± 0.01                                | -0.11 ± 0.01                                 | -0.01 ± 0.02                                 |
|                                              | badq | -165337.39 ± 0.00                      | -0.01 ± 0.01                               | -0.01 ± 0.01                                | -0.04 ± 0.01                                 | -0.01 ± 0.02                                 |
| CH <sub>3</sub> NH <sub>3</sub> <sup>+</sup> |      | -60350.21 ± 0.02                       | 0.13 ± 0.06                                | -0.08 ± 0.06                                | -0.29 ± 0.08                                 | -0.04 ± 0.08                                 |
|                                              | b    | -60350.95 ± 0.01                       | -0.02 ± 0.04                               | -0.05 ± 0.06                                | -0.02 ± 0.07                                 | -0.01 ± 0.10                                 |
|                                              | ba   | -60353.33 ± 0.01                       | 0.10 ± 0.02                                | 0.10 ± 0.02                                 | 0.12 ± 0.03                                  | 0.04 ± 0.03                                  |
|                                              | bad  | -60353.51 ± 0.01                       | -0.09 ± 0.02                               | -0.10 ± 0.02                                | -0.24 ± 0.03                                 | 0.04 ± 0.03                                  |
|                                              | badq | -60350.03 ± 0.01                       | 0.02 ± 0.02                                | 0.02 ± 0.02                                 | -0.08 ± 0.03                                 | 0.05 ± 0.03                                  |
| NH <sub>4</sub> <sup>+</sup>                 |      | -35656.21 ± 0.00                       | 0.02 ± 0.01                                | 0.02 ± 0.01                                 | 0.00 ± 0.01                                  | 0.03 ± 0.01                                  |
|                                              | b    | -35656.29 ± 0.00                       | 0.01 ± 0.01                                | 0.01 ± 0.01                                 | -0.03 ± 0.01                                 | 0.05 ± 0.02                                  |
|                                              | ba   | -35657.44 ± 0.00                       | -0.01 ± 0.01                               | -0.01 ± 0.01                                | -0.02 ± 0.01                                 | 0.01 ± 0.01                                  |
|                                              | bad  | -35657.44 ± 0.00                       | -0.01 ± 0.01                               | -0.01 ± 0.01                                | -0.02 ± 0.01                                 | 0.01 ± 0.01                                  |
|                                              | badq | -35656.32 ± 0.00                       | 0.00 ± 0.01                                | 0.00 ± 0.01                                 | -0.02 ± 0.01                                 | 0.02 ± 0.01                                  |
| CH <sub>3</sub> CO <sub>2</sub> <sup>-</sup> |      | -143225.98 ± 0.03                      | 0.71 ± 0.10                                | -0.26 ± 0.22                                | -2.27 ± 0.12                                 | 0.97 ± 0.29                                  |
|                                              | b    | -143225.39 ± 0.02                      | 0.57 ± 0.08                                | -0.02 ± 0.15                                | -1.08 ± 0.10                                 | 0.75 ± 0.18                                  |
|                                              | ba   | -143274.83 ± 0.02                      | 0.04 ± 0.05                                | 0.08 ± 0.06                                 | -0.26 ± 0.09                                 | 0.44 ± 0.08                                  |
|                                              | bad  | -143279.87 ± 0.02                      | -0.16 ± 0.04                               | -0.16 ± 0.06                                | -0.82 ± 0.07                                 | 0.50 ± 0.06                                  |
|                                              | badq | -143295.75 ± 0.02                      | 0.00 ± 0.04                                | -0.05 ± 0.06                                | -0.45 ± 0.07                                 | 0.09 ± 0.09                                  |
| H <sub>3</sub> O <sup>+</sup>                |      | -48069.23 ± 0.01                       | 0.22 ± 0.03                                | 0.12 ± 0.06                                 | -1.15 ± 0.04                                 | 1.35 ± 0.07                                  |
|                                              | b    | -48069.30 ± 0.01                       | 0.06 ± 0.03                                | -0.02 ± 0.07                                | -1.07 ± 0.03                                 | 0.96 ± 0.08                                  |
|                                              | ba   | -48069.33 ± 0.00                       | 0.06 ± 0.01                                | 0.06 ± 0.01                                 | -0.06 ± 0.01                                 | 0.18 ± 0.01                                  |

*Continued on next page*

Table 25 – Continued from previous page

| Molec.                            | MM'  | $\Delta G_{\text{TI3}}^{N_i=11}$ | $\Delta \Delta G_{\text{TI}}^{N_i=2}$ | $\Delta \Delta G_{\text{BAR}}^{N_i=2}$ | $\Delta \Delta G_{\text{IEXP}}^{N_i=1}$ | $\Delta \Delta G_{\text{DEXP}}^{N_i=1}$ |
|-----------------------------------|------|----------------------------------|---------------------------------------|----------------------------------------|-----------------------------------------|-----------------------------------------|
|                                   | bad  | -48069.33 ± 0.00                 | 0.06 ± 0.01                           | 0.06 ± 0.01                            | -0.06 ± 0.01                            | 0.18 ± 0.01                             |
|                                   | badq | -48069.38 ± 0.00                 | 0.02 ± 0.01                           | 0.02 ± 0.01                            | -0.05 ± 0.01                            | 0.08 ± 0.01                             |
| C <sub>6</sub> H <sub>5</sub> Cl  |      | -433852.25 ± 0.02                | 0.14 ± 0.05                           | 0.07 ± 0.06                            | 0.01 ± 0.09                             | -0.08 ± 0.13                            |
|                                   | b    | -433850.13 ± 0.01                | 0.14 ± 0.03                           | 0.13 ± 0.03                            | 0.27 ± 0.06                             | 0.01 ± 0.06                             |
|                                   | ba   | -433853.89 ± 0.01                | 0.06 ± 0.03                           | 0.06 ± 0.03                            | 0.07 ± 0.06                             | 0.01 ± 0.04                             |
|                                   | bad  | -433855.52 ± 0.01                | 0.04 ± 0.03                           | 0.02 ± 0.03                            | -0.25 ± 0.04                            | 0.15 ± 0.05                             |
|                                   | badq | -433858.60 ± 0.01                | -0.02 ± 0.03                          | -0.04 ± 0.04                           | -0.18 ± 0.04                            | 0.02 ± 0.07                             |
| C <sub>6</sub> H <sub>14</sub>    |      | -148579.56 ± 0.01                | -0.17 ± 0.03                          | -0.14 ± 0.04                           | -0.69 ± 0.05                            | 0.45 ± 0.05                             |
|                                   | b    | -148580.35 ± 0.01                | -0.10 ± 0.02                          | -0.10 ± 0.03                           | -0.50 ± 0.07                            | 0.31 ± 0.03                             |
|                                   | ba   | -148579.69 ± 0.01                | -0.02 ± 0.02                          | -0.01 ± 0.03                           | -0.38 ± 0.05                            | 0.45 ± 0.03                             |
|                                   | bad  | -148579.55 ± 0.01                | -0.07 ± 0.02                          | -0.06 ± 0.03                           | -0.36 ± 0.05                            | 0.35 ± 0.03                             |
|                                   | badq | -148577.13 ± 0.01                | -0.07 ± 0.02                          | -0.07 ± 0.03                           | -0.40 ± 0.05                            | 0.32 ± 0.03                             |
| CH <sub>3</sub> OH                |      | -72528.21 ± 0.01                 | 0.07 ± 0.02                           | 0.05 ± 0.02                            | -0.48 ± 0.01                            | 0.52 ± 0.03                             |
|                                   | b    | -72528.26 ± 0.01                 | 0.06 ± 0.02                           | 0.04 ± 0.02                            | -0.41 ± 0.02                            | 0.44 ± 0.03                             |
|                                   | ba   | -72528.29 ± 0.01                 | 0.10 ± 0.02                           | 0.08 ± 0.02                            | -0.40 ± 0.02                            | 0.51 ± 0.03                             |
|                                   | bad  | -72528.28 ± 0.01                 | 0.13 ± 0.02                           | 0.11 ± 0.02                            | -0.38 ± 0.02                            | 0.54 ± 0.03                             |
|                                   | badq | -72528.80 ± 0.01                 | 0.11 ± 0.02                           | 0.09 ± 0.02                            | -0.40 ± 0.02                            | 0.52 ± 0.03                             |
| C <sub>2</sub> H <sub>6</sub>     |      | -50024.21 ± 0.00                 | 0.00 ± 0.01                           | 0.00 ± 0.01                            | -0.09 ± 0.02                            | 0.11 ± 0.01                             |
|                                   | b    | -50024.36 ± 0.00                 | 0.01 ± 0.01                           | 0.01 ± 0.01                            | -0.04 ± 0.01                            | 0.05 ± 0.02                             |
|                                   | ba   | -50024.20 ± 0.00                 | 0.03 ± 0.00                           | 0.03 ± 0.01                            | 0.06 ± 0.01                             | 0.01 ± 0.01                             |
|                                   | bad  | -50024.28 ± 0.00                 | 0.02 ± 0.01                           | 0.02 ± 0.01                            | 0.05 ± 0.01                             | 0.00 ± 0.01                             |
|                                   | badq | -50024.44 ± 0.00                 | 0.02 ± 0.00                           | 0.02 ± 0.01                            | 0.05 ± 0.01                             | -0.01 ± 0.01                            |
| (CH <sub>2</sub> ) <sub>4</sub> O |      | -145699.56 ± 0.02                | 0.50 ± 0.05                           | 0.36 ± 0.10                            | -1.30 ± 0.08                            | 2.01 ± 0.10                             |
|                                   | b    | -145699.47 ± 0.02                | 0.74 ± 0.06                           | 0.50 ± 0.18                            | -1.49 ± 0.12                            | 2.48 ± 0.18                             |

Continued on next page

Table 25 – Continued from previous page

| Molec.                            | MM'  | $\Delta G_{\text{TI3}}^{N_i=11}$ | $\Delta \Delta G_{\text{TI}}^{N_i=2}$ | $\Delta \Delta G_{\text{BAR}}^{N_i=2}$ | $\Delta \Delta G_{\text{IEXP}}^{N_i=1}$ | $\Delta \Delta G_{\text{DEXP}}^{N_i=1}$ |
|-----------------------------------|------|----------------------------------|---------------------------------------|----------------------------------------|-----------------------------------------|-----------------------------------------|
|                                   | ba   | -145697.65 ± 0.01                | 0.11 ± 0.03                           | 0.09 ± 0.04                            | -0.26 ± 0.04                            | 0.42 ± 0.06                             |
|                                   | bad  | -145698.65 ± 0.01                | 0.12 ± 0.03                           | 0.10 ± 0.04                            | -0.33 ± 0.04                            | 0.48 ± 0.06                             |
|                                   | badq | -145689.76 ± 0.01                | 0.10 ± 0.03                           | 0.10 ± 0.04                            | -0.29 ± 0.05                            | 0.52 ± 0.04                             |
| $\text{C}(\text{NH}_2)_3^+$       |      | -128901.22 ± 0.03                | 1.52 ± 0.15                           | -0.20 ± 0.23                           | -1.46 ± 0.09                            | 0.59 ± 0.30                             |
|                                   | b    | -128902.74 ± 0.03                | 0.77 ± 0.13                           | -0.27 ± 0.19                           | -1.23 ± 0.09                            | 0.11 ± 0.27                             |
|                                   | ba   | -128929.38 ± 0.03                | 0.55 ± 0.10                           | -0.05 ± 0.13                           | -0.40 ± 0.31                            | 0.04 ± 0.25                             |
|                                   | bad  | -128932.44 ± 0.02                | 0.51 ± 0.09                           | -0.06 ± 0.11                           | -0.67 ± 0.07                            | 0.16 ± 0.18                             |
|                                   | badq | -128914.70 ± 0.02                | 0.42 ± 0.07                           | 0.07 ± 0.08                            | -0.51 ± 0.07                            | 0.28 ± 0.11                             |
| $\text{C}_6\text{H}_5\text{NH}_2$ |      | -180227.49 ± 0.01                | -0.14 ± 0.03                          | -0.08 ± 0.07                           | -1.16 ± 0.07                            | 1.06 ± 0.05                             |
|                                   | b    | -180227.72 ± 0.01                | 0.02 ± 0.03                           | 0.06 ± 0.05                            | -0.97 ± 0.06                            | 1.14 ± 0.04                             |
|                                   | ba   | -180232.65 ± 0.01                | 0.02 ± 0.02                           | 0.02 ± 0.02                            | -0.40 ± 0.03                            | 0.46 ± 0.02                             |
|                                   | bad  | -180231.64 ± 0.01                | 0.04 ± 0.02                           | 0.03 ± 0.03                            | -0.40 ± 0.03                            | 0.46 ± 0.03                             |
|                                   | badq | -180261.12 ± 0.01                | 0.26 ± 0.03                           | 0.20 ± 0.04                            | -0.69 ± 0.04                            | 1.05 ± 0.04                             |
| $\text{CH}_3\text{CONH}_2$        |      | -131075.55 ± 0.01                | -0.21 ± 0.02                          | -0.16 ± 0.04                           | -1.07 ± 0.06                            | 0.78 ± 0.03                             |
|                                   | b    | -131075.53 ± 0.01                | -0.22 ± 0.03                          | -0.21 ± 0.06                           | -1.40 ± 0.07                            | 1.01 ± 0.04                             |
|                                   | ba   | -131080.95 ± 0.01                | -0.14 ± 0.02                          | -0.12 ± 0.03                           | -0.82 ± 0.04                            | 0.61 ± 0.03                             |
|                                   | bad  | -131081.99 ± 0.01                | -0.12 ± 0.02                          | -0.10 ± 0.03                           | -0.80 ± 0.04                            | 0.65 ± 0.02                             |
|                                   | badq | -131071.90 ± 0.01                | -0.17 ± 0.02                          | -0.16 ± 0.03                           | -0.85 ± 0.04                            | 0.56 ± 0.03                             |
| $\text{H}_2\text{O}$              |      | -47893.37 ± 0.00                 | 0.04 ± 0.01                           | 0.04 ± 0.01                            | -0.14 ± 0.01                            | 0.21 ± 0.01                             |
|                                   | b    | -47893.41 ± 0.00                 | 0.01 ± 0.01                           | 0.01 ± 0.01                            | -0.14 ± 0.01                            | 0.15 ± 0.01                             |
|                                   | ba   | -47893.40 ± 0.00                 | -0.01 ± 0.01                          | -0.01 ± 0.01                           | -0.30 ± 0.01                            | 0.27 ± 0.02                             |
|                                   | bad  | -47893.40 ± 0.00                 | -0.01 ± 0.01                          | -0.01 ± 0.01                           | -0.30 ± 0.01                            | 0.27 ± 0.02                             |
|                                   | badq | -47893.40 ± 0.00                 | -0.01 ± 0.01                          | -0.01 ± 0.01                           | -0.30 ± 0.01                            | 0.27 ± 0.02                             |
| $\text{C}_2\text{H}_5\text{OH}$   |      | -97162.98 ± 0.01                 | 0.05 ± 0.02                           | 0.04 ± 0.02                            | -0.40 ± 0.02                            | 0.44 ± 0.03                             |

Continued on next page

Table 25 – Continued from previous page

| Molec.                           | MM'  | $\Delta G_{\text{TI3}}^{N_{\lambda}=11}$ | $\Delta\Delta G_{\text{TI}}^{N_{\lambda}=2}$ | $\Delta\Delta G_{\text{BAR}}^{N_{\lambda}=2}$ | $\Delta\Delta G_{\text{IEXP}}^{N_{\lambda}=1}$ | $\Delta\Delta G_{\text{DEXP}}^{N_{\lambda}=1}$ |
|----------------------------------|------|------------------------------------------|----------------------------------------------|-----------------------------------------------|------------------------------------------------|------------------------------------------------|
|                                  | b    | -97163.06 ± 0.00                         | 0.01 ± 0.01                                  | 0.01 ± 0.01                                   | -0.23 ± 0.01                                   | 0.25 ± 0.02                                    |
|                                  | ba   | -97163.47 ± 0.01                         | 0.11 ± 0.03                                  | 0.06 ± 0.04                                   | -0.76 ± 0.03                                   | 0.81 ± 0.04                                    |
|                                  | bad  | -97163.66 ± 0.01                         | 0.08 ± 0.02                                  | 0.05 ± 0.04                                   | -0.78 ± 0.03                                   | 0.83 ± 0.04                                    |
|                                  | badq | -97163.34 ± 0.01                         | 0.12 ± 0.02                                  | 0.08 ± 0.03                                   | -0.71 ± 0.02                                   | 0.81 ± 0.04                                    |
| C <sub>6</sub> H <sub>6</sub>    |      | -145560.00 ± 0.01                        | 0.06 ± 0.01                                  | 0.07 ± 0.02                                   | -0.44 ± 0.02                                   | 0.60 ± 0.01                                    |
|                                  | b    | -145560.43 ± 0.00                        | 0.02 ± 0.01                                  | 0.02 ± 0.01                                   | -0.17 ± 0.01                                   | 0.21 ± 0.01                                    |
|                                  | ba   | -145565.77 ± 0.00                        | -0.05 ± 0.01                                 | -0.05 ± 0.01                                  | -0.21 ± 0.01                                   | 0.12 ± 0.01                                    |
|                                  | bad  | -145564.02 ± 0.00                        | -0.08 ± 0.01                                 | -0.08 ± 0.01                                  | -0.17 ± 0.01                                   | 0.01 ± 0.01                                    |
|                                  | badq | -145563.39 ± 0.00                        | -0.04 ± 0.01                                 | -0.04 ± 0.01                                  | -0.13 ± 0.01                                   | 0.05 ± 0.01                                    |
| C <sub>6</sub> H <sub>5</sub> OH |      | -192693.96 ± 0.01                        | 0.03 ± 0.02                                  | -0.01 ± 0.03                                  | -0.78 ± 0.02                                   | 0.69 ± 0.04                                    |
|                                  | b    | -192694.26 ± 0.01                        | 0.01 ± 0.02                                  | 0.00 ± 0.02                                   | -0.46 ± 0.02                                   | 0.45 ± 0.03                                    |
|                                  | ba   | -192699.45 ± 0.00                        | 0.03 ± 0.01                                  | 0.02 ± 0.02                                   | -0.36 ± 0.01                                   | 0.38 ± 0.02                                    |
|                                  | bad  | -192698.00 ± 0.01                        | 0.03 ± 0.01                                  | 0.02 ± 0.02                                   | -0.36 ± 0.01                                   | 0.38 ± 0.02                                    |
|                                  | badq | -192712.32 ± 0.00                        | 0.07 ± 0.01                                  | 0.06 ± 0.02                                   | -0.44 ± 0.02                                   | 0.54 ± 0.02                                    |

Table 26: MM-to-QM gas-phase solvation free energy correction values from 3- $\lambda$  states simulated for 200 ps

| Molec.                                       | MM'  | $\Delta G_{\text{TI3}}^{N_\lambda=11}$ | $\Delta\Delta G_{\text{TI}}^{N_\lambda=3}$ | $\Delta\Delta G_{\text{BAR}}^{N_\lambda=3}$ | $\Delta\Delta G_{\text{IEXP}}^{N_\lambda=2}$ | $\Delta\Delta G_{\text{DEXP}}^{N_\lambda=2}$ |
|----------------------------------------------|------|----------------------------------------|--------------------------------------------|---------------------------------------------|----------------------------------------------|----------------------------------------------|
| CO <sub>3</sub> <sup>2-</sup>                |      | -165234.08 ± 0.05                      | 0.48 ± 0.12                                | 0.89 ± 0.27                                 | -6.93 ± 0.20                                 | 8.70 ± 0.21                                  |
|                                              | b    | -165233.97 ± 0.00                      | 0.15 ± 0.01                                | 0.11 ± 0.01                                 | 0.01 ± 0.01                                  | 0.20 ± 0.01                                  |
|                                              | ba   | -165298.74 ± 0.00                      | 0.05 ± 0.01                                | 0.03 ± 0.01                                 | -0.04 ± 0.01                                 | 0.09 ± 0.05                                  |
|                                              | bad  | -165350.72 ± 0.00                      | -0.01 ± 0.01                               | -0.02 ± 0.01                                | -0.05 ± 0.01                                 | 0.01 ± 0.01                                  |
|                                              | badq | -165337.39 ± 0.00                      | 0.01 ± 0.01                                | 0.01 ± 0.01                                 | -0.01 ± 0.01                                 | 0.02 ± 0.01                                  |
| CH <sub>3</sub> NH <sub>3</sub> <sup>+</sup> |      | -60350.21 ± 0.02                       | -0.02 ± 0.05                               | -0.05 ± 0.04                                | -0.09 ± 0.07                                 | -0.04 ± 0.05                                 |
|                                              | b    | -60350.95 ± 0.01                       | -0.02 ± 0.03                               | -0.03 ± 0.04                                | -0.07 ± 0.04                                 | 0.02 ± 0.06                                  |
|                                              | ba   | -60353.33 ± 0.01                       | 0.06 ± 0.02                                | 0.07 ± 0.02                                 | 0.08 ± 0.02                                  | 0.05 ± 0.02                                  |
|                                              | bad  | -60353.51 ± 0.01                       | -0.01 ± 0.02                               | -0.03 ± 0.02                                | -0.11 ± 0.03                                 | 0.05 ± 0.02                                  |
|                                              | badq | -60350.03 ± 0.01                       | -0.01 ± 0.02                               | -0.01 ± 0.02                                | -0.05 ± 0.02                                 | 0.02 ± 0.03                                  |
| NH <sub>4</sub> <sup>+</sup>                 |      | -35656.21 ± 0.00                       | -0.02 ± 0.01                               | -0.01 ± 0.01                                | -0.02 ± 0.01                                 | 0.00 ± 0.01                                  |
|                                              | b    | -35656.29 ± 0.00                       | -0.01 ± 0.00                               | 0.00 ± 0.00                                 | -0.02 ± 0.01                                 | 0.02 ± 0.01                                  |
|                                              | ba   | -35657.44 ± 0.00                       | 0.00 ± 0.01                                | 0.00 ± 0.00                                 | -0.01 ± 0.01                                 | 0.00 ± 0.01                                  |
|                                              | bad  | -35657.44 ± 0.00                       | 0.00 ± 0.01                                | 0.00 ± 0.00                                 | -0.01 ± 0.01                                 | 0.00 ± 0.01                                  |
|                                              | badq | -35656.32 ± 0.00                       | 0.00 ± 0.01                                | 0.00 ± 0.00                                 | -0.01 ± 0.01                                 | 0.01 ± 0.01                                  |
| CH <sub>3</sub> CO <sub>2</sub> <sup>-</sup> |      | -143225.98 ± 0.03                      | -0.01 ± 0.08                               | -0.09 ± 0.09                                | -1.17 ± 0.09                                 | 0.64 ± 0.15                                  |
|                                              | b    | -143225.39 ± 0.02                      | 0.22 ± 0.05                                | 0.17 ± 0.07                                 | -0.44 ± 0.07                                 | 0.50 ± 0.11                                  |
|                                              | ba   | -143274.83 ± 0.02                      | 0.05 ± 0.04                                | 0.06 ± 0.05                                 | -0.09 ± 0.08                                 | 0.23 ± 0.07                                  |
|                                              | bad  | -143279.87 ± 0.02                      | -0.01 ± 0.04                               | -0.04 ± 0.04                                | -0.39 ± 0.08                                 | 0.31 ± 0.06                                  |
|                                              | badq | -143295.75 ± 0.02                      | 0.01 ± 0.04                                | 0.01 ± 0.04                                 | -0.20 ± 0.05                                 | 0.12 ± 0.05                                  |
| H <sub>3</sub> O <sup>+</sup>                |      | -48069.23 ± 0.01                       | -0.11 ± 0.03                               | -0.05 ± 0.03                                | -0.68 ± 0.03                                 | 0.53 ± 0.04                                  |
|                                              | b    | -48069.30 ± 0.01                       | 0.07 ± 0.03                                | 0.05 ± 0.03                                 | -0.49 ± 0.03                                 | 0.55 ± 0.05                                  |
|                                              | ba   | -48069.33 ± 0.00                       | 0.03 ± 0.01                                | 0.03 ± 0.01                                 | -0.03 ± 0.01                                 | 0.09 ± 0.01                                  |

*Continued on next page*

Table 26 – *Continued from previous page*

| Molec.                            | MM'  | $\Delta G_{\text{TI3}}^{N_i=11}$ | $\Delta\Delta G_{\text{TI}}^{N_i=3}$ | $\Delta\Delta G_{\text{BAR}}^{N_i=3}$ | $\Delta\Delta G_{\text{IEXP}}^{N_i=2}$ | $\Delta\Delta G_{\text{DEXP}}^{N_i=2}$ |
|-----------------------------------|------|----------------------------------|--------------------------------------|---------------------------------------|----------------------------------------|----------------------------------------|
|                                   | bad  | -48069.33 ± 0.00                 | 0.03 ± 0.01                          | 0.03 ± 0.01                           | -0.03 ± 0.01                           | 0.09 ± 0.01                            |
|                                   | badq | -48069.38 ± 0.00                 | 0.04 ± 0.01                          | 0.03 ± 0.01                           | 0.00 ± 0.01                            | 0.06 ± 0.01                            |
| C <sub>6</sub> H <sub>5</sub> Cl  |      | -433852.25 ± 0.02                | 0.03 ± 0.05                          | 0.04 ± 0.04                           | 0.02 ± 0.06                            | 0.00 ± 0.07                            |
|                                   | b    | -433850.13 ± 0.01                | 0.06 ± 0.03                          | 0.08 ± 0.03                           | 0.15 ± 0.04                            | -0.01 ± 0.05                           |
|                                   | ba   | -433853.89 ± 0.01                | -0.02 ± 0.02                         | -0.01 ± 0.02                          | -0.01 ± 0.03                           | -0.02 ± 0.03                           |
|                                   | bad  | -433855.52 ± 0.01                | 0.04 ± 0.02                          | 0.04 ± 0.02                           | -0.09 ± 0.03                           | 0.12 ± 0.04                            |
|                                   | badq | -433858.60 ± 0.01                | -0.05 ± 0.02                         | -0.05 ± 0.02                          | -0.13 ± 0.03                           | 0.00 ± 0.04                            |
| C <sub>6</sub> H <sub>14</sub>    |      | -148579.56 ± 0.01                | 0.00 ± 0.03                          | -0.03 ± 0.03                          | -0.33 ± 0.04                           | 0.29 ± 0.04                            |
|                                   | b    | -148580.35 ± 0.01                | -0.06 ± 0.02                         | -0.06 ± 0.02                          | -0.25 ± 0.03                           | 0.13 ± 0.02                            |
|                                   | ba   | -148579.69 ± 0.01                | 0.03 ± 0.02                          | 0.02 ± 0.02                           | -0.18 ± 0.03                           | 0.24 ± 0.02                            |
|                                   | bad  | -148579.55 ± 0.01                | -0.08 ± 0.02                         | -0.08 ± 0.02                          | -0.24 ± 0.03                           | 0.12 ± 0.02                            |
|                                   | badq | -148577.13 ± 0.01                | 0.03 ± 0.02                          | 0.01 ± 0.02                           | -0.17 ± 0.03                           | 0.20 ± 0.02                            |
| CH <sub>3</sub> OH                |      | -72528.21 ± 0.01                 | 0.00 ± 0.01                          | 0.01 ± 0.01                           | -0.26 ± 0.01                           | 0.26 ± 0.02                            |
|                                   | b    | -72528.26 ± 0.01                 | 0.00 ± 0.01                          | 0.01 ± 0.01                           | -0.22 ± 0.01                           | 0.21 ± 0.02                            |
|                                   | ba   | -72528.29 ± 0.01                 | 0.01 ± 0.01                          | 0.03 ± 0.01                           | -0.22 ± 0.01                           | 0.25 ± 0.02                            |
|                                   | bad  | -72528.28 ± 0.01                 | 0.04 ± 0.01                          | 0.06 ± 0.01                           | -0.19 ± 0.01                           | 0.28 ± 0.02                            |
|                                   | badq | -72528.80 ± 0.01                 | 0.02 ± 0.01                          | 0.04 ± 0.01                           | -0.20 ± 0.01                           | 0.26 ± 0.02                            |
| C <sub>2</sub> H <sub>6</sub>     |      | -50024.21 ± 0.00                 | -0.01 ± 0.01                         | -0.01 ± 0.01                          | -0.06 ± 0.01                           | 0.05 ± 0.01                            |
|                                   | b    | -50024.36 ± 0.00                 | 0.04 ± 0.01                          | 0.04 ± 0.01                           | 0.01 ± 0.02                            | 0.06 ± 0.02                            |
|                                   | ba   | -50024.20 ± 0.00                 | 0.01 ± 0.00                          | 0.01 ± 0.00                           | 0.02 ± 0.01                            | 0.00 ± 0.01                            |
|                                   | bad  | -50024.28 ± 0.00                 | 0.00 ± 0.00                          | 0.00 ± 0.00                           | 0.01 ± 0.01                            | -0.01 ± 0.01                           |
|                                   | badq | -50024.44 ± 0.00                 | 0.03 ± 0.01                          | 0.03 ± 0.00                           | 0.04 ± 0.01                            | 0.01 ± 0.01                            |
| (CH <sub>2</sub> ) <sub>4</sub> O |      | -145699.56 ± 0.02                | 0.16 ± 0.04                          | 0.20 ± 0.04                           | -0.73 ± 0.04                           | 1.10 ± 0.05                            |
|                                   | b    | -145699.47 ± 0.02                | 0.10 ± 0.05                          | 0.17 ± 0.07                           | -0.90 ± 0.05                           | 1.18 ± 0.10                            |

*Continued on next page*



Table 26 – *Continued from previous page*

| Molec.                            | MM'  | $\Delta G_{\text{TI3}}^{N_i=11}$ | $\Delta\Delta G_{\text{TI}}^{N_i=3}$ | $\Delta\Delta G_{\text{BAR}}^{N_i=3}$ | $\Delta\Delta G_{\text{IEXP}}^{N_i=2}$ | $\Delta\Delta G_{\text{DEXP}}^{N_i=2}$ |
|-----------------------------------|------|----------------------------------|--------------------------------------|---------------------------------------|----------------------------------------|----------------------------------------|
|                                   | ba   | -145697.65 ± 0.01                | 0.00 ± 0.02                          | 0.02 ± 0.03                           | -0.17 ± 0.04                           | 0.20 ± 0.04                            |
|                                   | bad  | -145698.65 ± 0.01                | -0.03 ± 0.03                         | 0.00 ± 0.02                           | -0.22 ± 0.03                           | 0.21 ± 0.03                            |
|                                   | badq | -145689.76 ± 0.01                | -0.03 ± 0.03                         | -0.01 ± 0.03                          | -0.20 ± 0.05                           | 0.20 ± 0.04                            |
| $\text{C}(\text{NH}_2)_3^+$       |      | -128901.22 ± 0.03                | 0.40 ± 0.09                          | 0.12 ± 0.17                           | -0.63 ± 0.09                           | 0.39 ± 0.25                            |
|                                   | b    | -128902.74 ± 0.03                | 0.00 ± 0.08                          | -0.14 ± 0.09                          | -0.65 ± 0.09                           | -0.01 ± 0.18                           |
|                                   | ba   | -128929.38 ± 0.03                | 0.13 ± 0.06                          | 0.03 ± 0.06                           | -0.28 ± 0.11                           | 0.13 ± 0.11                            |
|                                   | bad  | -128932.44 ± 0.02                | 0.24 ± 0.05                          | 0.14 ± 0.07                           | -0.21 ± 0.08                           | 0.26 ± 0.12                            |
|                                   | badq | -128914.70 ± 0.02                | -0.07 ± 0.04                         | -0.07 ± 0.05                          | -0.44 ± 0.04                           | 0.12 ± 0.07                            |
| $\text{C}_6\text{H}_5\text{NH}_2$ |      | -180227.49 ± 0.01                | -0.06 ± 0.03                         | -0.07 ± 0.03                          | -0.64 ± 0.04                           | 0.53 ± 0.03                            |
|                                   | b    | -180227.72 ± 0.01                | -0.03 ± 0.02                         | -0.02 ± 0.02                          | -0.56 ± 0.03                           | 0.55 ± 0.03                            |
|                                   | ba   | -180232.65 ± 0.01                | 0.00 ± 0.01                          | 0.00 ± 0.01                           | -0.21 ± 0.02                           | 0.22 ± 0.02                            |
|                                   | bad  | -180231.64 ± 0.01                | 0.00 ± 0.02                          | 0.01 ± 0.02                           | -0.20 ± 0.02                           | 0.22 ± 0.02                            |
|                                   | badq | -180261.12 ± 0.01                | 0.07 ± 0.02                          | 0.10 ± 0.02                           | -0.36 ± 0.02                           | 0.53 ± 0.03                            |
| $\text{CH}_3\text{CONH}_2$        |      | -131075.55 ± 0.01                | 0.03 ± 0.01                          | -0.01 ± 0.02                          | -0.49 ± 0.03                           | 0.49 ± 0.02                            |
|                                   | b    | -131075.53 ± 0.01                | 0.00 ± 0.02                          | -0.04 ± 0.03                          | -0.68 ± 0.03                           | 0.60 ± 0.03                            |
|                                   | ba   | -131080.95 ± 0.01                | 0.02 ± 0.01                          | -0.01 ± 0.01                          | -0.39 ± 0.02                           | 0.38 ± 0.01                            |
|                                   | bad  | -131081.99 ± 0.01                | 0.04 ± 0.01                          | 0.01 ± 0.01                           | -0.36 ± 0.02                           | 0.41 ± 0.01                            |
|                                   | badq | -131071.90 ± 0.01                | -0.01 ± 0.01                         | -0.04 ± 0.01                          | -0.42 ± 0.02                           | 0.35 ± 0.02                            |
| $\text{H}_2\text{O}$              |      | -47893.37 ± 0.00                 | -0.01 ± 0.00                         | 0.00 ± 0.00                           | -0.09 ± 0.01                           | 0.09 ± 0.01                            |
|                                   | b    | -47893.41 ± 0.00                 | 0.00 ± 0.00                          | 0.00 ± 0.00                           | -0.08 ± 0.00                           | 0.07 ± 0.01                            |
|                                   | ba   | -47893.40 ± 0.00                 | 0.00 ± 0.01                          | -0.01 ± 0.01                          | -0.15 ± 0.01                           | 0.14 ± 0.01                            |
|                                   | bad  | -47893.40 ± 0.00                 | 0.00 ± 0.01                          | -0.01 ± 0.01                          | -0.15 ± 0.01                           | 0.14 ± 0.01                            |
|                                   | badq | -47893.40 ± 0.00                 | 0.00 ± 0.01                          | -0.01 ± 0.01                          | -0.15 ± 0.01                           | 0.14 ± 0.01                            |
| $\text{C}_2\text{H}_5\text{OH}$   |      | -97162.98 ± 0.01                 | -0.01 ± 0.01                         | 0.00 ± 0.01                           | -0.22 ± 0.01                           | 0.22 ± 0.02                            |

*Continued on next page*

Table 26 – *Continued from previous page*

| Molec.                          | MM'  | $\Delta G_{\text{TI3}}^{N_i=11}$ | $\Delta\Delta G_{\text{TI}}^{N_i=3}$ | $\Delta\Delta G_{\text{BAR}}^{N_i=3}$ | $\Delta\Delta G_{\text{IEXP}}^{N_i=2}$ | $\Delta\Delta G_{\text{DEXP}}^{N_i=2}$ |
|---------------------------------|------|----------------------------------|--------------------------------------|---------------------------------------|----------------------------------------|----------------------------------------|
|                                 | b    | $-97163.06 \pm 0.00$             | $0.00 \pm 0.01$                      | $0.00 \pm 0.01$                       | $-0.12 \pm 0.01$                       | $0.12 \pm 0.01$                        |
|                                 | ba   | $-97163.47 \pm 0.01$             | $0.01 \pm 0.02$                      | $0.02 \pm 0.02$                       | $-0.39 \pm 0.02$                       | $0.40 \pm 0.03$                        |
|                                 | bad  | $-97163.66 \pm 0.01$             | $0.02 \pm 0.02$                      | $0.03 \pm 0.02$                       | $-0.41 \pm 0.02$                       | $0.45 \pm 0.02$                        |
|                                 | badq | $-97163.34 \pm 0.01$             | $0.02 \pm 0.02$                      | $0.04 \pm 0.02$                       | $-0.37 \pm 0.02$                       | $0.41 \pm 0.02$                        |
| $\text{C}_6\text{H}_6$          |      | $-145560.00 \pm 0.01$            | $0.00 \pm 0.01$                      | $0.02 \pm 0.01$                       | $-0.24 \pm 0.01$                       | $0.28 \pm 0.01$                        |
|                                 | b    | $-145560.43 \pm 0.00$            | $0.02 \pm 0.01$                      | $0.02 \pm 0.01$                       | $-0.07 \pm 0.01$                       | $0.11 \pm 0.01$                        |
|                                 | ba   | $-145565.77 \pm 0.00$            | $-0.03 \pm 0.01$                     | $-0.03 \pm 0.01$                      | $-0.12 \pm 0.01$                       | $0.05 \pm 0.01$                        |
|                                 | bad  | $-145564.02 \pm 0.00$            | $0.30 \pm 0.02$                      | $0.22 \pm 0.01$                       | $0.21 \pm 0.07$                        | $0.23 \pm 0.07$                        |
|                                 | badq | $-145563.39 \pm 0.00$            | $0.01 \pm 0.02$                      | $0.00 \pm 0.01$                       | $-0.02 \pm 0.01$                       | $0.02 \pm 0.01$                        |
| $\text{C}_6\text{H}_5\text{OH}$ |      | $-192693.96 \pm 0.01$            | $0.00 \pm 0.02$                      | $0.01 \pm 0.02$                       | $-0.40 \pm 0.02$                       | $0.38 \pm 0.02$                        |
|                                 | b    | $-192694.26 \pm 0.01$            | $0.01 \pm 0.01$                      | $0.01 \pm 0.01$                       | $-0.23 \pm 0.01$                       | $0.24 \pm 0.02$                        |
|                                 | ba   | $-192699.45 \pm 0.00$            | $0.02 \pm 0.01$                      | $0.02 \pm 0.01$                       | $-0.17 \pm 0.01$                       | $0.20 \pm 0.01$                        |
|                                 | bad  | $-192698.00 \pm 0.01$            | $0.01 \pm 0.01$                      | $0.01 \pm 0.01$                       | $-0.18 \pm 0.01$                       | $0.19 \pm 0.01$                        |
|                                 | badq | $-192712.32 \pm 0.00$            | $0.01 \pm 0.01$                      | $0.02 \pm 0.01$                       | $-0.22 \pm 0.01$                       | $0.26 \pm 0.01$                        |

Table 27: MM-to-QM gas-phase solvation free energy correction values from 6- $\lambda$  states simulated for 200 ps

| Molec.                                       | MM'  | $\Delta G_{\text{TI3}}^{N_\lambda=11}$ | $\Delta\Delta G_{\text{TI}}^{N_\lambda=6}$ | $\Delta\Delta G_{\text{BAR}}^{N_\lambda=6}$ | $\Delta\Delta G_{\text{IEXP}}^{N_\lambda=5}$ | $\Delta\Delta G_{\text{DEXP}}^{N_\lambda=5}$ |
|----------------------------------------------|------|----------------------------------------|--------------------------------------------|---------------------------------------------|----------------------------------------------|----------------------------------------------|
| CO <sub>3</sub> <sup>2-</sup>                |      | -165234.08 ± 0.05                      | 0.03 ± 0.09                                | 0.15 ± 0.10                                 | -2.92 ± 0.15                                 | 3.20 ± 0.14                                  |
|                                              | b    | -165233.97 ± 0.00                      | -0.04 ± 0.01                               | -0.03 ± 0.01                                | -0.07 ± 0.01                                 | 0.00 ± 0.01                                  |
|                                              | ba   | -165298.74 ± 0.00                      | 0.01 ± 0.01                                | 0.01 ± 0.00                                 | -0.02 ± 0.01                                 | 0.04 ± 0.02                                  |
|                                              | bad  | -165350.72 ± 0.00                      | -0.01 ± 0.00                               | -0.01 ± 0.00                                | -0.02 ± 0.01                                 | 0.00 ± 0.01                                  |
|                                              | badq | -165337.39 ± 0.00                      | -0.01 ± 0.00                               | -0.01 ± 0.00                                | -0.01 ± 0.00                                 | 0.00 ± 0.01                                  |
| CH <sub>3</sub> NH <sub>3</sub> <sup>+</sup> |      | -60350.21 ± 0.02                       | 0.05 ± 0.04                                | 0.05 ± 0.04                                 | 0.01 ± 0.05                                  | 0.06 ± 0.05                                  |
|                                              | b    | -60350.95 ± 0.01                       | 0.00 ± 0.02                                | 0.00 ± 0.02                                 | 0.00 ± 0.02                                  | 0.00 ± 0.03                                  |
|                                              | ba   | -60353.33 ± 0.01                       | 0.06 ± 0.01                                | 0.06 ± 0.01                                 | 0.07 ± 0.01                                  | 0.05 ± 0.01                                  |
|                                              | bad  | -60353.51 ± 0.01                       | -0.01 ± 0.01                               | -0.02 ± 0.01                                | -0.05 ± 0.01                                 | 0.01 ± 0.01                                  |
|                                              | badq | -60350.03 ± 0.01                       | -0.04 ± 0.01                               | -0.04 ± 0.01                                | -0.05 ± 0.02                                 | -0.03 ± 0.02                                 |
| NH <sub>4</sub> <sup>+</sup>                 |      | -35656.21 ± 0.00                       | 0.00 ± 0.00                                | 0.00 ± 0.00                                 | 0.00 ± 0.00                                  | 0.00 ± 0.00                                  |
|                                              | b    | -35656.29 ± 0.00                       | 0.00 ± 0.00                                | 0.00 ± 0.00                                 | -0.01 ± 0.00                                 | 0.00 ± 0.01                                  |
|                                              | ba   | -35657.44 ± 0.00                       | 0.01 ± 0.00                                | 0.00 ± 0.00                                 | 0.00 ± 0.00                                  | 0.01 ± 0.00                                  |
|                                              | bad  | -35657.44 ± 0.00                       | 0.01 ± 0.00                                | 0.00 ± 0.00                                 | 0.00 ± 0.00                                  | 0.01 ± 0.00                                  |
|                                              | badq | -35656.32 ± 0.00                       | -0.01 ± 0.00                               | -0.01 ± 0.00                                | -0.01 ± 0.00                                 | 0.00 ± 0.00                                  |
| CH <sub>3</sub> CO <sub>2</sub> <sup>-</sup> |      | -143225.98 ± 0.03                      | -0.05 ± 0.06                               | -0.05 ± 0.05                                | -0.48 ± 0.06                                 | 0.30 ± 0.07                                  |
|                                              | b    | -143225.39 ± 0.02                      | -0.05 ± 0.04                               | -0.03 ± 0.04                                | -0.31 ± 0.04                                 | 0.18 ± 0.05                                  |
|                                              | ba   | -143274.83 ± 0.02                      | -0.02 ± 0.03                               | -0.02 ± 0.03                                | -0.12 ± 0.03                                 | 0.08 ± 0.03                                  |
|                                              | bad  | -143279.87 ± 0.02                      | -0.03 ± 0.03                               | -0.04 ± 0.03                                | -0.16 ± 0.04                                 | 0.08 ± 0.04                                  |
|                                              | badq | -143295.75 ± 0.02                      | 0.00 ± 0.03                                | 0.00 ± 0.03                                 | -0.07 ± 0.04                                 | 0.05 ± 0.04                                  |
| H <sub>3</sub> O <sup>+</sup>                |      | -48069.23 ± 0.01                       | 0.03 ± 0.02                                | 0.03 ± 0.02                                 | -0.23 ± 0.02                                 | 0.28 ± 0.02                                  |
|                                              | b    | -48069.30 ± 0.01                       | -0.01 ± 0.02                               | -0.01 ± 0.02                                | -0.21 ± 0.02                                 | 0.18 ± 0.03                                  |
|                                              | ba   | -48069.33 ± 0.00                       | 0.02 ± 0.01                                | 0.02 ± 0.00                                 | 0.00 ± 0.01                                  | 0.04 ± 0.01                                  |

*Continued on next page*

Table 27 – Continued from previous page

| Molec.                            | MM'  | $\Delta G_{\text{TI3}}^{N_i=11}$ | $\Delta\Delta G_{\text{TI}}^{N_i=6}$ | $\Delta\Delta G_{\text{BAR}}^{N_i=6}$ | $\Delta\Delta G_{\text{IEXP}}^{N_i=5}$ | $\Delta\Delta G_{\text{DEXP}}^{N_i=5}$ |
|-----------------------------------|------|----------------------------------|--------------------------------------|---------------------------------------|----------------------------------------|----------------------------------------|
|                                   | bad  | -48069.33 ± 0.00                 | 0.02 ± 0.01                          | 0.02 ± 0.00                           | 0.00 ± 0.01                            | 0.04 ± 0.01                            |
|                                   | badq | -48069.38 ± 0.00                 | -0.01 ± 0.01                         | -0.01 ± 0.00                          | -0.02 ± 0.01                           | 0.00 ± 0.01                            |
| C <sub>6</sub> H <sub>5</sub> Cl  |      | -433852.25 ± 0.02                | -0.05 ± 0.04                         | -0.04 ± 0.03                          | -0.04 ± 0.04                           | -0.05 ± 0.04                           |
|                                   | b    | -433850.13 ± 0.01                | -0.02 ± 0.02                         | -0.01 ± 0.02                          | 0.01 ± 0.03                            | -0.03 ± 0.03                           |
|                                   | ba   | -433853.89 ± 0.01                | -0.03 ± 0.02                         | -0.02 ± 0.01                          | -0.02 ± 0.02                           | -0.03 ± 0.02                           |
|                                   | bad  | -433855.52 ± 0.01                | -0.05 ± 0.02                         | -0.05 ± 0.01                          | -0.09 ± 0.02                           | -0.01 ± 0.02                           |
|                                   | badq | -433858.60 ± 0.01                | 0.03 ± 0.02                          | 0.02 ± 0.01                           | 0.00 ± 0.02                            | 0.04 ± 0.02                            |
| C <sub>6</sub> H <sub>14</sub>    |      | -148579.56 ± 0.01                | -0.01 ± 0.02                         | -0.01 ± 0.02                          | -0.13 ± 0.02                           | 0.10 ± 0.02                            |
|                                   | b    | -148580.35 ± 0.01                | -0.02 ± 0.01                         | -0.02 ± 0.01                          | -0.11 ± 0.02                           | 0.06 ± 0.01                            |
|                                   | ba   | -148579.69 ± 0.01                | 0.02 ± 0.01                          | 0.01 ± 0.01                           | -0.08 ± 0.01                           | 0.11 ± 0.01                            |
|                                   | bad  | -148579.55 ± 0.01                | -0.01 ± 0.01                         | -0.01 ± 0.01                          | -0.08 ± 0.02                           | 0.07 ± 0.01                            |
|                                   | badq | -148577.13 ± 0.01                | -0.03 ± 0.01                         | -0.03 ± 0.01                          | -0.12 ± 0.01                           | 0.06 ± 0.01                            |
| CH <sub>3</sub> OH                |      | -72528.21 ± 0.01                 | 0.01 ± 0.01                          | 0.01 ± 0.01                           | -0.09 ± 0.01                           | 0.11 ± 0.01                            |
|                                   | b    | -72528.26 ± 0.01                 | 0.01 ± 0.01                          | 0.01 ± 0.01                           | -0.08 ± 0.01                           | 0.09 ± 0.01                            |
|                                   | ba   | -72528.29 ± 0.01                 | 0.00 ± 0.01                          | 0.01 ± 0.01                           | -0.08 ± 0.03                           | 0.10 ± 0.03                            |
|                                   | bad  | -72528.28 ± 0.01                 | -0.05 ± 0.01                         | -0.04 ± 0.01                          | -0.13 ± 0.01                           | 0.06 ± 0.01                            |
|                                   | badq | -72528.80 ± 0.01                 | -0.02 ± 0.01                         | -0.01 ± 0.01                          | -0.11 ± 0.01                           | 0.08 ± 0.01                            |
| C <sub>2</sub> H <sub>6</sub>     |      | -50024.21 ± 0.00                 | 0.02 ± 0.01                          | 0.02 ± 0.01                           | 0.00 ± 0.01                            | 0.04 ± 0.01                            |
|                                   | b    | -50024.36 ± 0.00                 | 0.00 ± 0.01                          | 0.00 ± 0.01                           | -0.01 ± 0.01                           | 0.00 ± 0.01                            |
|                                   | ba   | -50024.20 ± 0.00                 | 0.00 ± 0.00                          | 0.00 ± 0.00                           | 0.01 ± 0.00                            | 0.00 ± 0.00                            |
|                                   | bad  | -50024.28 ± 0.00                 | 0.00 ± 0.00                          | 0.00 ± 0.00                           | 0.01 ± 0.00                            | 0.00 ± 0.00                            |
|                                   | badq | -50024.44 ± 0.00                 | 0.00 ± 0.00                          | 0.00 ± 0.00                           | 0.00 ± 0.00                            | -0.01 ± 0.00                           |
| (CH <sub>2</sub> ) <sub>4</sub> O |      | -145699.56 ± 0.02                | -0.07 ± 0.04                         | -0.05 ± 0.04                          | -0.40 ± 0.04                           | 0.29 ± 0.04                            |
|                                   | b    | -145699.47 ± 0.02                | 0.10 ± 0.04                          | 0.12 ± 0.04                           | -0.30 ± 0.05                           | 0.52 ± 0.06                            |

Continued on next page

Table 27 – Continued from previous page

| Molec.                            | MM'  | $\Delta G_{\text{TI3}}^{N_i=11}$ | $\Delta \Delta G_{\text{TI}}^{N_i=6}$ | $\Delta \Delta G_{\text{BAR}}^{N_i=6}$ | $\Delta \Delta G_{\text{IEXP}}^{N_i=5}$ | $\Delta \Delta G_{\text{DEXP}}^{N_i=5}$ |
|-----------------------------------|------|----------------------------------|---------------------------------------|----------------------------------------|-----------------------------------------|-----------------------------------------|
|                                   | ba   | -145697.65 ± 0.01                | 0.00 ± 0.01                           | 0.01 ± 0.01                            | -0.07 ± 0.02                            | 0.09 ± 0.02                             |
|                                   | bad  | -145698.65 ± 0.01                | 0.00 ± 0.02                           | 0.00 ± 0.01                            | -0.09 ± 0.02                            | 0.08 ± 0.02                             |
|                                   | badq | -145689.76 ± 0.01                | -0.06 ± 0.02                          | -0.06 ± 0.01                           | -0.14 ± 0.02                            | 0.03 ± 0.02                             |
| $\text{C}(\text{NH}_2)_3^+$       |      | -128901.22 ± 0.03                | 0.06 ± 0.06                           | 0.04 ± 0.09                            | -0.24 ± 0.08                            | 0.15 ± 0.17                             |
|                                   | b    | -128902.74 ± 0.03                | -0.03 ± 0.06                          | -0.04 ± 0.06                           | -0.25 ± 0.07                            | 0.03 ± 0.09                             |
|                                   | ba   | -128929.38 ± 0.03                | 0.04 ± 0.05                           | 0.03 ± 0.05                            | -0.08 ± 0.07                            | 0.07 ± 0.06                             |
|                                   | bad  | -128932.44 ± 0.02                | 0.06 ± 0.04                           | 0.05 ± 0.05                            | -0.08 ± 0.06                            | 0.11 ± 0.07                             |
|                                   | badq | -128914.70 ± 0.02                | 0.06 ± 0.04                           | 0.06 ± 0.04                            | -0.03 ± 0.08                            | 0.12 ± 0.07                             |
| $\text{C}_6\text{H}_5\text{NH}_2$ |      | -180227.49 ± 0.01                | 0.01 ± 0.02                           | 0.01 ± 0.02                            | -0.23 ± 0.02                            | 0.25 ± 0.02                             |
|                                   | b    | -180227.72 ± 0.01                | 0.00 ± 0.02                           | 0.00 ± 0.01                            | -0.22 ± 0.02                            | 0.23 ± 0.02                             |
|                                   | ba   | -180232.65 ± 0.01                | 0.00 ± 0.01                           | 0.00 ± 0.01                            | -0.09 ± 0.01                            | 0.09 ± 0.01                             |
|                                   | bad  | -180231.64 ± 0.01                | 0.00 ± 0.01                           | 0.00 ± 0.01                            | -0.08 ± 0.01                            | 0.09 ± 0.01                             |
|                                   | badq | -180261.12 ± 0.01                | 0.02 ± 0.01                           | 0.03 ± 0.01                            | -0.15 ± 0.02                            | 0.21 ± 0.02                             |
| $\text{CH}_3\text{CONH}_2$        |      | -131075.55 ± 0.01                | 0.03 ± 0.01                           | 0.02 ± 0.01                            | -0.18 ± 0.02                            | 0.22 ± 0.01                             |
|                                   | b    | -131075.53 ± 0.01                | -0.03 ± 0.01                          | -0.03 ± 0.01                           | -0.29 ± 0.02                            | 0.23 ± 0.02                             |
|                                   | ba   | -131080.95 ± 0.01                | 0.01 ± 0.01                           | 0.01 ± 0.01                            | -0.15 ± 0.01                            | 0.16 ± 0.01                             |
|                                   | bad  | -131081.99 ± 0.01                | -0.02 ± 0.01                          | -0.03 ± 0.01                           | -0.18 ± 0.01                            | 0.13 ± 0.01                             |
|                                   | badq | -131071.90 ± 0.01                | 0.01 ± 0.01                           | 0.00 ± 0.01                            | -0.15 ± 0.01                            | 0.16 ± 0.01                             |
| $\text{H}_2\text{O}$              |      | -47893.37 ± 0.00                 | 0.00 ± 0.00                           | 0.00 ± 0.00                            | -0.04 ± 0.00                            | 0.03 ± 0.00                             |
|                                   | b    | -47893.41 ± 0.00                 | 0.00 ± 0.00                           | 0.00 ± 0.00                            | -0.03 ± 0.00                            | 0.03 ± 0.00                             |
|                                   | ba   | -47893.40 ± 0.00                 | -0.01 ± 0.00                          | -0.01 ± 0.00                           | -0.06 ± 0.00                            | 0.05 ± 0.00                             |
|                                   | bad  | -47893.40 ± 0.00                 | -0.01 ± 0.00                          | -0.01 ± 0.00                           | -0.06 ± 0.00                            | 0.05 ± 0.00                             |
|                                   | badq | -47893.40 ± 0.00                 | -0.01 ± 0.00                          | -0.01 ± 0.00                           | -0.06 ± 0.00                            | 0.05 ± 0.00                             |
| $\text{C}_2\text{H}_5\text{OH}$   |      | -97162.98 ± 0.01                 | 0.00 ± 0.01                           | 0.00 ± 0.01                            | -0.09 ± 0.01                            | 0.09 ± 0.01                             |

Continued on next page

Table 27 – Continued from previous page

| Molec.                          | MM'  | $\Delta G_{\text{TI3}}^{N_i=11}$ | $\Delta\Delta G_{\text{TI}}^{N_i=6}$ | $\Delta\Delta G_{\text{BAR}}^{N_i=6}$ | $\Delta\Delta G_{\text{IEXP}}^{N_i=5}$ | $\Delta\Delta G_{\text{DEXP}}^{N_i=5}$ |
|---------------------------------|------|----------------------------------|--------------------------------------|---------------------------------------|----------------------------------------|----------------------------------------|
|                                 | b    | $-97163.06 \pm 0.00$             | $0.00 \pm 0.01$                      | $0.00 \pm 0.01$                       | $-0.05 \pm 0.01$                       | $0.05 \pm 0.01$                        |
|                                 | ba   | $-97163.47 \pm 0.01$             | $0.00 \pm 0.01$                      | $0.01 \pm 0.01$                       | $-0.17 \pm 0.01$                       | $0.17 \pm 0.01$                        |
|                                 | bad  | $-97163.66 \pm 0.01$             | $0.00 \pm 0.01$                      | $0.00 \pm 0.01$                       | $-0.16 \pm 0.01$                       | $0.16 \pm 0.02$                        |
|                                 | badq | $-97163.34 \pm 0.01$             | $-0.02 \pm 0.01$                     | $-0.02 \pm 0.01$                      | $-0.17 \pm 0.01$                       | $0.14 \pm 0.02$                        |
| $\text{C}_6\text{H}_6$          |      | $-145560.00 \pm 0.01$            | $0.00 \pm 0.01$                      | $0.00 \pm 0.01$                       | $-0.10 \pm 0.01$                       | $0.10 \pm 0.01$                        |
|                                 | b    | $-145560.43 \pm 0.00$            | $-0.02 \pm 0.01$                     | $-0.02 \pm 0.01$                      | $-0.05 \pm 0.01$                       | $0.01 \pm 0.01$                        |
|                                 | ba   | $-145565.77 \pm 0.00$            | $0.01 \pm 0.01$                      | $0.01 \pm 0.01$                       | $-0.02 \pm 0.02$                       | $0.04 \pm 0.02$                        |
|                                 | bad  | $-145564.02 \pm 0.00$            | $-0.03 \pm 0.00$                     | $-0.03 \pm 0.00$                      | $-0.05 \pm 0.02$                       | $-0.01 \pm 0.02$                       |
|                                 | badq | $-145563.39 \pm 0.00$            | $-0.01 \pm 0.01$                     | $-0.01 \pm 0.00$                      | $-0.02 \pm 0.01$                       | $0.01 \pm 0.01$                        |
| $\text{C}_6\text{H}_5\text{OH}$ |      | $-192693.96 \pm 0.01$            | $0.01 \pm 0.01$                      | $0.01 \pm 0.01$                       | $-0.14 \pm 0.02$                       | $0.15 \pm 0.02$                        |
|                                 | b    | $-192694.26 \pm 0.01$            | $0.00 \pm 0.01$                      | $0.00 \pm 0.01$                       | $-0.09 \pm 0.01$                       | $0.08 \pm 0.01$                        |
|                                 | ba   | $-192699.45 \pm 0.00$            | $-0.01 \pm 0.01$                     | $-0.01 \pm 0.01$                      | $-0.09 \pm 0.01$                       | $0.07 \pm 0.01$                        |
|                                 | bad  | $-192698.00 \pm 0.01$            | $0.02 \pm 0.01$                      | $0.02 \pm 0.01$                       | $-0.06 \pm 0.01$                       | $0.09 \pm 0.01$                        |
|                                 | badq | $-192712.32 \pm 0.00$            | $-0.01 \pm 0.01$                     | $-0.01 \pm 0.01$                      | $-0.11 \pm 0.01$                       | $0.09 \pm 0.01$                        |

Table 28: MM-to-QM gas-phase solvation free energy correction values from 2- $\lambda$  states simulated for 100 ps

| Molec.                     | MM'  | $\Delta G_{\text{TI3}}^{N_\lambda=11}$ | $\Delta\Delta G_{\text{TI}}^{N_\lambda=2}$ | $\Delta\Delta G_{\text{BAR}}^{N_\lambda=2}$ | $\Delta\Delta G_{\text{IEXP}}^{N_\lambda=1}$ | $\Delta\Delta G_{\text{DEXP}}^{N_\lambda=1}$ |
|----------------------------|------|----------------------------------------|--------------------------------------------|---------------------------------------------|----------------------------------------------|----------------------------------------------|
| $\text{CO}_3^{2-}$         |      | $-165234.08 \pm 0.05$                  | $3.07 \pm 0.26$                            | $2.24 \pm 0.36$                             | $-12.30 \pm 0.17$                            | $16.79 \pm 0.32$                             |
|                            | b    | $-165233.97 \pm 0.00$                  | $0.06 \pm 0.03$                            | $0.05 \pm 0.03$                             | $-0.18 \pm 0.03$                             | $0.19 \pm 0.05$                              |
|                            | ba   | $-165298.74 \pm 0.00$                  | $-0.01 \pm 0.02$                           | $-0.02 \pm 0.03$                            | $-0.16 \pm 0.02$                             | $0.05 \pm 0.13$                              |
|                            | bad  | $-165350.72 \pm 0.00$                  | $-0.02 \pm 0.02$                           | $-0.03 \pm 0.02$                            | $-0.10 \pm 0.02$                             | $-0.02 \pm 0.03$                             |
|                            | badq | $-165337.39 \pm 0.00$                  | $0.02 \pm 0.02$                            | $0.02 \pm 0.02$                             | $-0.03 \pm 0.02$                             | $-0.01 \pm 0.03$                             |
| $\text{CH}_3\text{NH}_3^+$ |      | $-60350.21 \pm 0.02$                   | $0.10 \pm 0.09$                            | $-0.10 \pm 0.08$                            | $-0.26 \pm 0.13$                             | $0.00 \pm 0.11$                              |
|                            | b    | $-60350.95 \pm 0.01$                   | $0.07 \pm 0.06$                            | $-0.01 \pm 0.10$                            | $0.05 \pm 0.10$                              | $-0.08 \pm 0.15$                             |
|                            | ba   | $-60353.33 \pm 0.01$                   | $0.18 \pm 0.03$                            | $0.17 \pm 0.03$                             | $0.10 \pm 0.04$                              | $0.25 \pm 0.04$                              |
|                            | bad  | $-60353.51 \pm 0.01$                   | $-0.12 \pm 0.03$                           | $-0.11 \pm 0.03$                            | $-0.18 \pm 0.04$                             | $-0.07 \pm 0.05$                             |
|                            | badq | $-60350.03 \pm 0.01$                   | $-0.11 \pm 0.03$                           | $-0.11 \pm 0.03$                            | $-0.15 \pm 0.03$                             | $-0.18 \pm 0.06$                             |
| $\text{NH}_4^+$            |      | $-35656.21 \pm 0.00$                   | $0.05 \pm 0.01$                            | $0.05 \pm 0.01$                             | $0.04 \pm 0.01$                              | $0.05 \pm 0.02$                              |
|                            | b    | $-35656.29 \pm 0.00$                   | $0.03 \pm 0.01$                            | $0.03 \pm 0.01$                             | $0.01 \pm 0.01$                              | $0.04 \pm 0.03$                              |
|                            | ba   | $-35657.44 \pm 0.00$                   | $0.01 \pm 0.01$                            | $0.01 \pm 0.01$                             | $0.01 \pm 0.01$                              | $0.00 \pm 0.02$                              |
|                            | bad  | $-35657.44 \pm 0.00$                   | $0.01 \pm 0.01$                            | $0.01 \pm 0.01$                             | $0.01 \pm 0.01$                              | $0.00 \pm 0.02$                              |
|                            | badq | $-35656.32 \pm 0.00$                   | $0.01 \pm 0.01$                            | $0.01 \pm 0.01$                             | $-0.01 \pm 0.01$                             | $0.02 \pm 0.01$                              |
| $\text{CH}_3\text{CO}_2^-$ |      | $-143225.98 \pm 0.03$                  | $0.78 \pm 0.17$                            | $0.22 \pm 0.26$                             | $-1.34 \pm 0.25$                             | $1.69 \pm 0.24$                              |
|                            | b    | $-143225.39 \pm 0.02$                  | $0.09 \pm 0.10$                            | $-0.03 \pm 0.17$                            | $-1.04 \pm 0.18$                             | $0.75 \pm 0.22$                              |
|                            | ba   | $-143274.83 \pm 0.02$                  | $0.19 \pm 0.08$                            | $0.17 \pm 0.10$                             | $0.13 \pm 0.18$                              | $0.16 \pm 0.12$                              |
|                            | bad  | $-143279.87 \pm 0.02$                  | $0.11 \pm 0.08$                            | $0.17 \pm 0.11$                             | $-0.21 \pm 0.12$                             | $0.35 \pm 0.16$                              |
|                            | badq | $-143295.75 \pm 0.02$                  | $0.10 \pm 0.08$                            | $0.11 \pm 0.10$                             | $-0.14 \pm 0.12$                             | $-0.03 \pm 0.19$                             |
| $\text{H}_3\text{O}^+$     |      | $-48069.23 \pm 0.01$                   | $0.06 \pm 0.07$                            | $-0.08 \pm 0.13$                            | $-1.00 \pm 0.09$                             | $0.74 \pm 0.17$                              |
|                            | b    | $-48069.30 \pm 0.01$                   | $-0.01 \pm 0.08$                           | $-0.21 \pm 0.09$                            | $-0.94 \pm 0.07$                             | $0.25 \pm 0.12$                              |
|                            | ba   | $-48069.33 \pm 0.00$                   | $0.07 \pm 0.02$                            | $0.07 \pm 0.02$                             | $-0.05 \pm 0.02$                             | $0.18 \pm 0.03$                              |

*Continued on next page*

Table 28 – *Continued from previous page*

| Molec.                            | MM'  | $\Delta G_{\text{TI3}}^{N_i=11}$ | $\Delta \Delta G_{\text{TI}}^{N_i=2}$ | $\Delta \Delta G_{\text{BAR}}^{N_i=2}$ | $\Delta \Delta G_{\text{IEXP}}^{N_i=1}$ | $\Delta \Delta G_{\text{DEXP}}^{N_i=1}$ |
|-----------------------------------|------|----------------------------------|---------------------------------------|----------------------------------------|-----------------------------------------|-----------------------------------------|
|                                   | bad  | -48069.33 ± 0.00                 | 0.07 ± 0.02                           | 0.07 ± 0.02                            | -0.05 ± 0.02                            | 0.18 ± 0.03                             |
|                                   | badq | -48069.38 ± 0.00                 | 0.06 ± 0.02                           | 0.06 ± 0.02                            | -0.02 ± 0.03                            | 0.11 ± 0.04                             |
| C <sub>6</sub> H <sub>5</sub> Cl  |      | -433852.25 ± 0.02                | 0.17 ± 0.08                           | 0.17 ± 0.08                            | 0.50 ± 0.14                             | 0.04 ± 0.13                             |
|                                   | b    | -433850.13 ± 0.01                | -0.06 ± 0.05                          | -0.04 ± 0.05                           | 0.12 ± 0.12                             | 0.03 ± 0.07                             |
|                                   | ba   | -433853.89 ± 0.01                | 0.00 ± 0.04                           | -0.01 ± 0.05                           | -0.11 ± 0.07                            | 0.01 ± 0.07                             |
|                                   | bad  | -433855.52 ± 0.01                | 0.18 ± 0.04                           | 0.18 ± 0.04                            | 0.02 ± 0.05                             | 0.31 ± 0.06                             |
|                                   | badq | -433858.60 ± 0.01                | 0.14 ± 0.04                           | 0.12 ± 0.04                            | 0.06 ± 0.06                             | 0.13 ± 0.06                             |
| C <sub>6</sub> H <sub>14</sub>    |      | -148579.56 ± 0.01                | 0.03 ± 0.05                           | 0.10 ± 0.08                            | -0.48 ± 0.08                            | 0.78 ± 0.09                             |
|                                   | b    | -148580.35 ± 0.01                | 0.03 ± 0.03                           | 0.03 ± 0.06                            | -0.36 ± 0.10                            | 0.45 ± 0.04                             |
|                                   | ba   | -148579.69 ± 0.01                | -0.01 ± 0.03                          | 0.00 ± 0.04                            | -0.25 ± 0.06                            | 0.27 ± 0.05                             |
|                                   | bad  | -148579.55 ± 0.01                | 0.07 ± 0.03                           | 0.08 ± 0.04                            | -0.22 ± 0.06                            | 0.42 ± 0.05                             |
|                                   | badq | -148577.13 ± 0.01                | 0.08 ± 0.04                           | 0.07 ± 0.05                            | -0.27 ± 0.06                            | 0.40 ± 0.05                             |
| CH <sub>3</sub> OH                |      | -72528.21 ± 0.01                 | 0.07 ± 0.03                           | 0.02 ± 0.04                            | -0.50 ± 0.02                            | 0.41 ± 0.06                             |
|                                   | b    | -72528.26 ± 0.01                 | 0.06 ± 0.03                           | 0.02 ± 0.04                            | -0.43 ± 0.02                            | 0.39 ± 0.05                             |
|                                   | ba   | -72528.29 ± 0.01                 | 0.10 ± 0.03                           | 0.07 ± 0.03                            | -0.43 ± 0.02                            | 0.49 ± 0.05                             |
|                                   | bad  | -72528.28 ± 0.01                 | 0.13 ± 0.03                           | 0.10 ± 0.03                            | -0.40 ± 0.02                            | 0.54 ± 0.04                             |
|                                   | badq | -72528.80 ± 0.01                 | 0.11 ± 0.03                           | 0.08 ± 0.03                            | -0.42 ± 0.02                            | 0.49 ± 0.05                             |
| C <sub>2</sub> H <sub>6</sub>     |      | -50024.21 ± 0.00                 | 0.01 ± 0.02                           | 0.01 ± 0.02                            | -0.09 ± 0.03                            | 0.10 ± 0.03                             |
|                                   | b    | -50024.36 ± 0.00                 | 0.02 ± 0.01                           | 0.02 ± 0.02                            | -0.04 ± 0.02                            | 0.06 ± 0.04                             |
|                                   | ba   | -50024.20 ± 0.00                 | 0.04 ± 0.01                           | 0.04 ± 0.01                            | 0.04 ± 0.01                             | 0.03 ± 0.01                             |
|                                   | bad  | -50024.28 ± 0.00                 | 0.04 ± 0.01                           | 0.04 ± 0.01                            | 0.04 ± 0.01                             | 0.05 ± 0.01                             |
|                                   | badq | -50024.44 ± 0.00                 | 0.04 ± 0.01                           | 0.04 ± 0.01                            | 0.04 ± 0.01                             | 0.05 ± 0.02                             |
| (CH <sub>2</sub> ) <sub>4</sub> O |      | -145699.56 ± 0.02                | 0.51 ± 0.07                           | 0.29 ± 0.16                            | -1.38 ± 0.11                            | 1.78 ± 0.21                             |
|                                   | b    | -145699.47 ± 0.02                | 0.55 ± 0.09                           | 0.12 ± 0.23                            | -1.67 ± 0.10                            | 1.82 ± 0.27                             |

*Continued on next page*



Table 28 – *Continued from previous page*

| Molec.                            | MM'  | $\Delta G_{\text{TI3}}^{N_i=11}$ | $\Delta \Delta G_{\text{TI}}^{N_i=2}$ | $\Delta \Delta G_{\text{BAR}}^{N_i=2}$ | $\Delta \Delta G_{\text{IEXP}}^{N_i=1}$ | $\Delta \Delta G_{\text{DEXP}}^{N_i=1}$ |
|-----------------------------------|------|----------------------------------|---------------------------------------|----------------------------------------|-----------------------------------------|-----------------------------------------|
|                                   | ba   | -145697.65 ± 0.01                | 0.17 ± 0.04                           | 0.15 ± 0.05                            | -0.30 ± 0.05                            | 0.59 ± 0.06                             |
|                                   | bad  | -145698.65 ± 0.01                | 0.26 ± 0.04                           | 0.24 ± 0.06                            | -0.36 ± 0.05                            | 0.81 ± 0.07                             |
|                                   | badq | -145689.76 ± 0.01                | 0.01 ± 0.04                           | 0.00 ± 0.06                            | -0.36 ± 0.07                            | 0.29 ± 0.08                             |
| $\text{C}(\text{NH}_2)_3^+$       |      | -128901.22 ± 0.03                | 1.50 ± 0.32                           | -0.17 ± 0.20                           | -1.10 ± 0.11                            | 0.37 ± 0.43                             |
|                                   | b    | -128902.74 ± 0.03                | 1.80 ± 0.30                           | -0.06 ± 0.24                           | -0.73 ± 0.19                            | -0.24 ± 0.42                            |
|                                   | ba   | -128929.38 ± 0.03                | 1.43 ± 0.23                           | 0.11 ± 0.17                            | -0.53 ± 0.17                            | 0.38 ± 0.27                             |
|                                   | bad  | -128932.44 ± 0.02                | 0.51 ± 0.11                           | 0.14 ± 0.17                            | -0.43 ± 0.18                            | 0.40 ± 0.25                             |
|                                   | badq | -128914.70 ± 0.02                | 0.26 ± 0.10                           | 0.02 ± 0.09                            | -0.38 ± 0.10                            | 0.03 ± 0.14                             |
| $\text{C}_6\text{H}_5\text{NH}_2$ |      | -180227.49 ± 0.01                | -0.13 ± 0.05                          | -0.08 ± 0.09                           | -1.31 ± 0.08                            | 1.17 ± 0.06                             |
|                                   | b    | -180227.72 ± 0.01                | 0.02 ± 0.05                           | 0.02 ± 0.07                            | -1.07 ± 0.06                            | 1.08 ± 0.09                             |
|                                   | ba   | -180232.65 ± 0.01                | 0.09 ± 0.02                           | 0.09 ± 0.03                            | -0.32 ± 0.03                            | 0.48 ± 0.04                             |
|                                   | bad  | -180231.64 ± 0.01                | 0.09 ± 0.03                           | 0.08 ± 0.04                            | -0.33 ± 0.03                            | 0.45 ± 0.04                             |
|                                   | badq | -180261.12 ± 0.01                | 0.25 ± 0.04                           | 0.19 ± 0.06                            | -0.55 ± 0.06                            | 0.83 ± 0.09                             |
| $\text{CH}_3\text{CONH}_2$        |      | -131075.55 ± 0.01                | -0.18 ± 0.04                          | -0.15 ± 0.06                           | -0.97 ± 0.06                            | 0.73 ± 0.04                             |
|                                   | b    | -131075.53 ± 0.01                | -0.19 ± 0.05                          | -0.24 ± 0.08                           | -1.36 ± 0.08                            | 0.85 ± 0.07                             |
|                                   | ba   | -131080.95 ± 0.01                | -0.12 ± 0.03                          | -0.12 ± 0.05                           | -0.78 ± 0.06                            | 0.55 ± 0.04                             |
|                                   | bad  | -131081.99 ± 0.01                | -0.08 ± 0.03                          | -0.08 ± 0.05                           | -0.76 ± 0.06                            | 0.60 ± 0.04                             |
|                                   | badq | -131071.90 ± 0.01                | -0.13 ± 0.03                          | -0.14 ± 0.06                           | -0.81 ± 0.06                            | 0.52 ± 0.05                             |
| $\text{H}_2\text{O}$              |      | -47893.37 ± 0.00                 | 0.03 ± 0.01                           | 0.03 ± 0.01                            | -0.17 ± 0.01                            | 0.22 ± 0.01                             |
|                                   | b    | -47893.41 ± 0.00                 | 0.00 ± 0.01                           | 0.00 ± 0.01                            | -0.17 ± 0.01                            | 0.16 ± 0.02                             |
|                                   | ba   | -47893.40 ± 0.00                 | -0.02 ± 0.01                          | -0.03 ± 0.02                           | -0.35 ± 0.02                            | 0.27 ± 0.03                             |
|                                   | bad  | -47893.40 ± 0.00                 | -0.02 ± 0.01                          | -0.03 ± 0.02                           | -0.35 ± 0.02                            | 0.27 ± 0.03                             |
|                                   | badq | -47893.40 ± 0.00                 | -0.02 ± 0.01                          | -0.03 ± 0.02                           | -0.35 ± 0.02                            | 0.27 ± 0.03                             |
| $\text{C}_2\text{H}_5\text{OH}$   |      | -97162.98 ± 0.01                 | 0.06 ± 0.03                           | 0.05 ± 0.03                            | -0.39 ± 0.03                            | 0.44 ± 0.05                             |

*Continued on next page*

Table 28 – *Continued from previous page*

| Molec.                          | MM'  | $\Delta G_{\text{TI3}}^{N_{\lambda}=11}$ | $\Delta\Delta G_{\text{TI}}^{N_{\lambda}=2}$ | $\Delta\Delta G_{\text{BAR}}^{N_{\lambda}=2}$ | $\Delta\Delta G_{\text{IEXP}}^{N_{\lambda}=1}$ | $\Delta\Delta G_{\text{DEXP}}^{N_{\lambda}=1}$ |
|---------------------------------|------|------------------------------------------|----------------------------------------------|-----------------------------------------------|------------------------------------------------|------------------------------------------------|
|                                 | b    | $-97163.06 \pm 0.00$                     | $0.02 \pm 0.02$                              | $0.02 \pm 0.02$                               | $-0.22 \pm 0.02$                               | $0.23 \pm 0.03$                                |
|                                 | ba   | $-97163.47 \pm 0.01$                     | $0.14 \pm 0.05$                              | $0.04 \pm 0.06$                               | $-0.74 \pm 0.04$                               | $0.68 \pm 0.07$                                |
|                                 | bad  | $-97163.66 \pm 0.01$                     | $0.09 \pm 0.04$                              | $0.01 \pm 0.06$                               | $-0.76 \pm 0.04$                               | $0.66 \pm 0.07$                                |
|                                 | badq | $-97163.34 \pm 0.01$                     | $0.13 \pm 0.05$                              | $0.02 \pm 0.06$                               | $-0.69 \pm 0.04$                               | $0.58 \pm 0.08$                                |
| $\text{C}_6\text{H}_6$          |      | $-145560.00 \pm 0.01$                    | $0.04 \pm 0.01$                              | $0.04 \pm 0.02$                               | $-0.45 \pm 0.02$                               | $0.55 \pm 0.02$                                |
|                                 | b    | $-145560.43 \pm 0.00$                    | $0.01 \pm 0.01$                              | $0.01 \pm 0.02$                               | $-0.16 \pm 0.02$                               | $0.17 \pm 0.02$                                |
|                                 | ba   | $-145565.77 \pm 0.00$                    | $-0.04 \pm 0.01$                             | $-0.04 \pm 0.02$                              | $-0.22 \pm 0.02$                               | $0.13 \pm 0.02$                                |
|                                 | bad  | $-145564.02 \pm 0.00$                    | $-0.08 \pm 0.01$                             | $-0.08 \pm 0.01$                              | $-0.17 \pm 0.01$                               | $0.01 \pm 0.02$                                |
|                                 | badq | $-145563.39 \pm 0.00$                    | $-0.01 \pm 0.01$                             | $-0.01 \pm 0.01$                              | $-0.13 \pm 0.02$                               | $0.10 \pm 0.02$                                |
| $\text{C}_6\text{H}_5\text{OH}$ |      | $-192693.96 \pm 0.01$                    | $0.02 \pm 0.03$                              | $-0.01 \pm 0.05$                              | $-0.78 \pm 0.04$                               | $0.72 \pm 0.06$                                |
|                                 | b    | $-192694.26 \pm 0.01$                    | $0.01 \pm 0.02$                              | $0.00 \pm 0.03$                               | $-0.47 \pm 0.03$                               | $0.45 \pm 0.04$                                |
|                                 | ba   | $-192699.45 \pm 0.00$                    | $0.05 \pm 0.02$                              | $0.04 \pm 0.03$                               | $-0.34 \pm 0.02$                               | $0.39 \pm 0.04$                                |
|                                 | bad  | $-192698.00 \pm 0.01$                    | $0.04 \pm 0.02$                              | $0.03 \pm 0.02$                               | $-0.33 \pm 0.02$                               | $0.37 \pm 0.03$                                |
|                                 | badq | $-192712.32 \pm 0.00$                    | $0.09 \pm 0.02$                              | $0.09 \pm 0.03$                               | $-0.40 \pm 0.03$                               | $0.56 \pm 0.04$                                |

Table 29: MM-to-QM gas-phase solvation free energy correction values from 3- $\lambda$  states simulated for 100 ps

| Molec.                                       | MM'  | $\Delta G_{\text{TI3}}^{N_\lambda=11}$ | $\Delta\Delta G_{\text{TI}}^{N_\lambda=3}$ | $\Delta\Delta G_{\text{BAR}}^{N_\lambda=3}$ | $\Delta\Delta G_{\text{IEXP}}^{N_\lambda=2}$ | $\Delta\Delta G_{\text{DEXP}}^{N_\lambda=2}$ |
|----------------------------------------------|------|----------------------------------------|--------------------------------------------|---------------------------------------------|----------------------------------------------|----------------------------------------------|
| CO <sub>3</sub> <sup>2-</sup>                |      | -165234.08 ± 0.05                      | 0.35 ± 0.24                                | 0.68 ± 0.43                                 | -5.53 ± 0.34                                 | 6.88 ± 0.30                                  |
|                                              | b    | -165233.97 ± 0.00                      | 0.20 ± 0.03                                | 0.17 ± 0.02                                 | 0.07 ± 0.03                                  | 0.25 ± 0.03                                  |
|                                              | ba   | -165298.74 ± 0.00                      | 0.02 ± 0.02                                | 0.01 ± 0.02                                 | -0.05 ± 0.02                                 | 0.06 ± 0.09                                  |
|                                              | bad  | -165350.72 ± 0.00                      | 0.01 ± 0.02                                | 0.00 ± 0.01                                 | -0.04 ± 0.01                                 | 0.02 ± 0.02                                  |
|                                              | badq | -165337.39 ± 0.00                      | 0.03 ± 0.01                                | 0.03 ± 0.01                                 | 0.01 ± 0.01                                  | 0.03 ± 0.02                                  |
| CH <sub>3</sub> NH <sub>3</sub> <sup>+</sup> |      | -60350.21 ± 0.02                       | 0.08 ± 0.08                                | 0.04 ± 0.06                                 | -0.02 ± 0.08                                 | 0.01 ± 0.08                                  |
|                                              | b    | -60350.95 ± 0.01                       | -0.03 ± 0.05                               | -0.03 ± 0.07                                | -0.02 ± 0.07                                 | -0.05 ± 0.11                                 |
|                                              | ba   | -60353.33 ± 0.01                       | 0.11 ± 0.03                                | 0.12 ± 0.03                                 | 0.08 ± 0.03                                  | 0.17 ± 0.04                                  |
|                                              | bad  | -60353.51 ± 0.01                       | -0.06 ± 0.02                               | -0.07 ± 0.02                                | -0.11 ± 0.03                                 | -0.04 ± 0.03                                 |
|                                              | badq | -60350.03 ± 0.01                       | -0.09 ± 0.03                               | -0.09 ± 0.03                                | -0.11 ± 0.04                                 | -0.11 ± 0.04                                 |
| NH <sub>4</sub> <sup>+</sup>                 |      | -35656.21 ± 0.00                       | 0.10 ± 0.01                                | 0.09 ± 0.01                                 | 0.08 ± 0.02                                  | 0.09 ± 0.02                                  |
|                                              | b    | -35656.29 ± 0.00                       | 0.01 ± 0.01                                | 0.01 ± 0.01                                 | 0.00 ± 0.01                                  | 0.02 ± 0.01                                  |
|                                              | ba   | -35657.44 ± 0.00                       | 0.01 ± 0.01                                | 0.01 ± 0.01                                 | 0.02 ± 0.01                                  | 0.01 ± 0.01                                  |
|                                              | bad  | -35657.44 ± 0.00                       | 0.01 ± 0.01                                | 0.01 ± 0.01                                 | 0.02 ± 0.01                                  | 0.01 ± 0.01                                  |
|                                              | badq | -35656.32 ± 0.00                       | 0.00 ± 0.01                                | 0.00 ± 0.01                                 | -0.01 ± 0.01                                 | 0.00 ± 0.01                                  |
| CH <sub>3</sub> CO <sub>2</sub> <sup>-</sup> |      | -143225.98 ± 0.03                      | 0.14 ± 0.15                                | 0.14 ± 0.12                                 | -0.40 ± 0.18                                 | 0.55 ± 0.16                                  |
|                                              | b    | -143225.39 ± 0.02                      | -0.09 ± 0.08                               | -0.09 ± 0.08                                | -0.45 ± 0.15                                 | 0.31 ± 0.09                                  |
|                                              | ba   | -143274.83 ± 0.02                      | 0.10 ± 0.08                                | 0.12 ± 0.07                                 | 0.15 ± 0.12                                  | 0.03 ± 0.09                                  |
|                                              | bad  | -143279.87 ± 0.02                      | 0.51 ± 0.06                                | 0.45 ± 0.09                                 | 0.24 ± 0.14                                  | 0.65 ± 0.12                                  |
|                                              | badq | -143295.75 ± 0.02                      | 0.08 ± 0.06                                | 0.09 ± 0.06                                 | -0.03 ± 0.09                                 | 0.10 ± 0.09                                  |
| H <sub>3</sub> O <sup>+</sup>                |      | -48069.23 ± 0.01                       | -0.10 ± 0.07                               | -0.09 ± 0.09                                | -0.49 ± 0.08                                 | 0.26 ± 0.13                                  |
|                                              | b    | -48069.30 ± 0.01                       | 0.00 ± 0.06                                | -0.03 ± 0.05                                | -0.42 ± 0.05                                 | 0.22 ± 0.07                                  |
|                                              | ba   | -48069.33 ± 0.00                       | 0.03 ± 0.02                                | 0.04 ± 0.01                                 | -0.02 ± 0.02                                 | 0.09 ± 0.02                                  |

*Continued on next page*

Table 29 – Continued from previous page

| Molec.                            | MM'  | $\Delta G_{\text{TI3}}^{N_i=11}$ | $\Delta\Delta G_{\text{TI}}^{N_i=3}$ | $\Delta\Delta G_{\text{BAR}}^{N_i=3}$ | $\Delta\Delta G_{\text{IEXP}}^{N_i=2}$ | $\Delta\Delta G_{\text{DEXP}}^{N_i=2}$ |
|-----------------------------------|------|----------------------------------|--------------------------------------|---------------------------------------|----------------------------------------|----------------------------------------|
|                                   | bad  | -48069.33 ± 0.00                 | 0.03 ± 0.02                          | 0.04 ± 0.01                           | -0.02 ± 0.02                           | 0.09 ± 0.02                            |
|                                   | badq | -48069.38 ± 0.00                 | 0.05 ± 0.02                          | 0.05 ± 0.01                           | 0.01 ± 0.02                            | 0.09 ± 0.02                            |
| C <sub>6</sub> H <sub>5</sub> Cl  |      | -433852.25 ± 0.02                | -0.06 ± 0.07                         | -0.02 ± 0.05                          | 0.12 ± 0.09                            | -0.10 ± 0.08                           |
|                                   | b    | -433850.13 ± 0.01                | -0.02 ± 0.05                         | -0.02 ± 0.04                          | 0.04 ± 0.06                            | -0.02 ± 0.05                           |
|                                   | ba   | -433853.89 ± 0.01                | -0.06 ± 0.04                         | -0.05 ± 0.03                          | -0.10 ± 0.04                           | -0.02 ± 0.04                           |
|                                   | bad  | -433855.52 ± 0.01                | 0.03 ± 0.04                          | 0.06 ± 0.03                           | -0.02 ± 0.04                           | 0.14 ± 0.04                            |
|                                   | badq | -433858.60 ± 0.01                | 0.09 ± 0.04                          | 0.10 ± 0.03                           | 0.08 ± 0.04                            | 0.09 ± 0.05                            |
| C <sub>6</sub> H <sub>14</sub>    |      | -148579.56 ± 0.01                | 0.03 ± 0.04                          | 0.04 ± 0.04                           | -0.28 ± 0.05                           | 0.40 ± 0.06                            |
|                                   | b    | -148580.35 ± 0.01                | 0.00 ± 0.03                          | 0.00 ± 0.03                           | -0.20 ± 0.05                           | 0.21 ± 0.03                            |
|                                   | ba   | -148579.69 ± 0.01                | -0.02 ± 0.03                         | -0.02 ± 0.03                          | -0.14 ± 0.04                           | 0.11 ± 0.03                            |
|                                   | bad  | -148579.55 ± 0.01                | -0.01 ± 0.03                         | 0.01 ± 0.03                           | -0.14 ± 0.04                           | 0.16 ± 0.04                            |
|                                   | badq | -148577.13 ± 0.01                | 0.02 ± 0.03                          | 0.03 ± 0.03                           | -0.14 ± 0.04                           | 0.20 ± 0.04                            |
| CH <sub>3</sub> OH                |      | -72528.21 ± 0.01                 | 0.00 ± 0.02                          | 0.01 ± 0.02                           | -0.26 ± 0.02                           | 0.22 ± 0.04                            |
|                                   | b    | -72528.26 ± 0.01                 | 0.00 ± 0.02                          | 0.01 ± 0.02                           | -0.22 ± 0.02                           | 0.20 ± 0.03                            |
|                                   | ba   | -72528.29 ± 0.01                 | 0.02 ± 0.02                          | 0.03 ± 0.02                           | -0.21 ± 0.02                           | 0.25 ± 0.03                            |
|                                   | bad  | -72528.28 ± 0.01                 | 0.04 ± 0.02                          | 0.06 ± 0.02                           | -0.19 ± 0.02                           | 0.28 ± 0.03                            |
|                                   | badq | -72528.80 ± 0.01                 | 0.03 ± 0.03                          | 0.04 ± 0.02                           | -0.20 ± 0.02                           | 0.26 ± 0.03                            |
| C <sub>2</sub> H <sub>6</sub>     |      | -50024.21 ± 0.00                 | 0.02 ± 0.01                          | 0.01 ± 0.02                           | -0.04 ± 0.02                           | 0.07 ± 0.02                            |
|                                   | b    | -50024.36 ± 0.00                 | 0.04 ± 0.01                          | 0.04 ± 0.02                           | 0.01 ± 0.02                            | 0.06 ± 0.03                            |
|                                   | ba   | -50024.20 ± 0.00                 | -0.03 ± 0.01                         | -0.02 ± 0.01                          | -0.01 ± 0.02                           | -0.02 ± 0.02                           |
|                                   | bad  | -50024.28 ± 0.00                 | 0.00 ± 0.01                          | 0.01 ± 0.01                           | 0.00 ± 0.01                            | 0.01 ± 0.01                            |
|                                   | badq | -50024.44 ± 0.00                 | 0.05 ± 0.01                          | 0.05 ± 0.01                           | 0.04 ± 0.01                            | 0.05 ± 0.01                            |
| (CH <sub>2</sub> ) <sub>4</sub> O |      | -145699.56 ± 0.02                | -0.03 ± 0.06                         | 0.05 ± 0.07                           | -0.82 ± 0.07                           | 0.85 ± 0.09                            |
|                                   | b    | -145699.47 ± 0.02                | 0.10 ± 0.09                          | 0.13 ± 0.10                           | -0.72 ± 0.09                           | 0.78 ± 0.16                            |

Continued on next page

Table 29 – Continued from previous page

| Molec.                            | MM'                               | $\Delta G_{\text{TI3}}^{N_i=11}$ | $\Delta\Delta G_{\text{TI}}^{N_i=3}$ | $\Delta\Delta G_{\text{BAR}}^{N_i=3}$ | $\Delta\Delta G_{\text{IEXP}}^{N_i=2}$ | $\Delta\Delta G_{\text{DEXP}}^{N_i=2}$ |
|-----------------------------------|-----------------------------------|----------------------------------|--------------------------------------|---------------------------------------|----------------------------------------|----------------------------------------|
| $\text{C}(\text{NH}_2)_3^+$       | ba                                | -145697.65 ± 0.01                | 0.11 ± 0.04                          | 0.12 ± 0.03                           | -0.10 ± 0.04                           | 0.34 ± 0.04                            |
|                                   | bad                               | -145698.65 ± 0.01                | 0.08 ± 0.04                          | 0.11 ± 0.04                           | -0.19 ± 0.05                           | 0.40 ± 0.05                            |
|                                   | badq                              | -145689.76 ± 0.01                | -0.01 ± 0.04                         | -0.01 ± 0.03                          | -0.17 ± 0.05                           | 0.13 ± 0.05                            |
|                                   | b                                 | -128901.22 ± 0.03                | 0.27 ± 0.16                          | -0.15 ± 0.17                          | -0.16 ± 0.41                           | -0.05 ± 0.27                           |
|                                   | b                                 | -128902.74 ± 0.03                | 0.14 ± 0.14                          | -0.23 ± 0.15                          | -0.72 ± 0.17                           | -0.28 ± 0.29                           |
|                                   | ba                                | -128929.38 ± 0.03                | 0.31 ± 0.10                          | 0.09 ± 0.12                           | -0.44 ± 0.09                           | 0.25 ± 0.17                            |
|                                   | bad                               | -128932.44 ± 0.02                | 0.19 ± 0.07                          | 0.15 ± 0.09                           | -0.18 ± 0.11                           | 0.31 ± 0.14                            |
| $\text{C}_6\text{H}_5\text{NH}_2$ | badq                              | -128914.70 ± 0.02                | 0.20 ± 0.07                          | 0.15 ± 0.06                           | 0.01 ± 0.09                            | 0.17 ± 0.09                            |
|                                   | b                                 | -180227.49 ± 0.01                | -0.07 ± 0.04                         | -0.08 ± 0.04                          | -0.68 ± 0.06                           | 0.55 ± 0.04                            |
|                                   | b                                 | -180227.72 ± 0.01                | 0.01 ± 0.04                          | 0.01 ± 0.04                           | -0.54 ± 0.05                           | 0.57 ± 0.05                            |
|                                   | ba                                | -180232.65 ± 0.01                | 0.06 ± 0.02                          | 0.07 ± 0.02                           | -0.14 ± 0.02                           | 0.27 ± 0.02                            |
|                                   | bad                               | -180231.64 ± 0.01                | 0.04 ± 0.02                          | 0.05 ± 0.02                           | -0.16 ± 0.02                           | 0.24 ± 0.03                            |
|                                   | badq                              | -180261.12 ± 0.01                | 0.09 ± 0.04                          | 0.11 ± 0.03                           | -0.25 ± 0.04                           | 0.44 ± 0.05                            |
|                                   | CH <sub>3</sub> CONH <sub>2</sub> | b                                | -131075.55 ± 0.01                    | -0.02 ± 0.02                          | -0.04 ± 0.02                           | -0.50 ± 0.03                           |
| b                                 | -131075.53 ± 0.01                 | -0.05 ± 0.03                     | -0.08 ± 0.04                         | -0.70 ± 0.04                          | 0.51 ± 0.04                            |                                        |
| $\text{H}_2\text{O}$              | ba                                | -131080.95 ± 0.01                | 0.04 ± 0.02                          | 0.01 ± 0.02                           | -0.35 ± 0.03                           | 0.37 ± 0.02                            |
|                                   | bad                               | -131081.99 ± 0.01                | 0.02 ± 0.02                          | 0.00 ± 0.02                           | -0.36 ± 0.03                           | 0.36 ± 0.02                            |
|                                   | badq                              | -131071.90 ± 0.01                | 0.03 ± 0.02                          | 0.00 ± 0.02                           | -0.36 ± 0.03                           | 0.36 ± 0.03                            |
|                                   | ba                                | -47893.37 ± 0.00                 | 0.00 ± 0.01                          | 0.01 ± 0.01                           | -0.09 ± 0.01                           | 0.10 ± 0.01                            |
|                                   | b                                 | -47893.41 ± 0.00                 | 0.00 ± 0.00                          | 0.00 ± 0.00                           | -0.09 ± 0.01                           | 0.08 ± 0.01                            |
| $\text{C}_2\text{H}_5\text{OH}$   | ba                                | -47893.40 ± 0.00                 | -0.01 ± 0.01                         | -0.01 ± 0.01                          | -0.17 ± 0.01                           | 0.14 ± 0.02                            |
|                                   | bad                               | -47893.40 ± 0.00                 | -0.01 ± 0.01                         | -0.01 ± 0.01                          | -0.17 ± 0.01                           | 0.14 ± 0.02                            |
|                                   | badq                              | -47893.40 ± 0.00                 | -0.01 ± 0.01                         | -0.01 ± 0.01                          | -0.17 ± 0.01                           | 0.14 ± 0.02                            |
| $\text{C}_2\text{H}_5\text{OH}$   |                                   | -97162.98 ± 0.01                 | 0.01 ± 0.03                          | 0.02 ± 0.02                           | -0.18 ± 0.03                           | 0.20 ± 0.03                            |

Continued on next page

Table 29 – Continued from previous page

| Molec.                           | MM'  | $\Delta G_{\text{TI3}}^{N_i=11}$ | $\Delta\Delta G_{\text{TI}}^{N_i=3}$ | $\Delta\Delta G_{\text{BAR}}^{N_i=3}$ | $\Delta\Delta G_{\text{IEXP}}^{N_i=2}$ | $\Delta\Delta G_{\text{DEXP}}^{N_i=2}$ |
|----------------------------------|------|----------------------------------|--------------------------------------|---------------------------------------|----------------------------------------|----------------------------------------|
|                                  | b    | -97163.06 ± 0.00                 | 0.02 ± 0.02                          | 0.02 ± 0.01                           | -0.09 ± 0.02                           | 0.13 ± 0.02                            |
|                                  | ba   | -97163.47 ± 0.01                 | 0.02 ± 0.04                          | 0.03 ± 0.04                           | -0.35 ± 0.04                           | 0.34 ± 0.05                            |
|                                  | bad  | -97163.66 ± 0.01                 | 0.00 ± 0.03                          | 0.01 ± 0.03                           | -0.40 ± 0.03                           | 0.37 ± 0.04                            |
|                                  | badq | -97163.34 ± 0.01                 | 0.03 ± 0.04                          | 0.04 ± 0.03                           | -0.32 ± 0.03                           | 0.32 ± 0.05                            |
| C <sub>6</sub> H <sub>6</sub>    |      | -145560.00 ± 0.01                | -0.02 ± 0.02                         | -0.01 ± 0.01                          | -0.25 ± 0.02                           | 0.24 ± 0.02                            |
|                                  | b    | -145560.43 ± 0.00                | 0.02 ± 0.01                          | 0.01 ± 0.01                           | -0.07 ± 0.01                           | 0.09 ± 0.01                            |
|                                  | ba   | -145565.77 ± 0.00                | -0.01 ± 0.01                         | -0.02 ± 0.01                          | -0.11 ± 0.01                           | 0.07 ± 0.01                            |
|                                  | bad  | -145564.02 ± 0.00                | 0.44 ± 0.02                          | 0.34 ± 0.01                           | 0.30 ± 0.02                            | 0.38 ± 0.01                            |
|                                  | badq | -145563.39 ± 0.00                | 0.05 ± 0.03                          | 0.03 ± 0.02                           | 0.01 ± 0.02                            | 0.06 ± 0.02                            |
| C <sub>6</sub> H <sub>5</sub> OH |      | -192693.96 ± 0.01                | 0.01 ± 0.03                          | 0.01 ± 0.03                           | -0.39 ± 0.03                           | 0.38 ± 0.03                            |
|                                  | b    | -192694.26 ± 0.01                | 0.00 ± 0.02                          | 0.00 ± 0.02                           | -0.24 ± 0.02                           | 0.24 ± 0.02                            |
|                                  | ba   | -192699.45 ± 0.00                | 0.02 ± 0.02                          | 0.02 ± 0.01                           | -0.17 ± 0.02                           | 0.21 ± 0.02                            |
|                                  | bad  | -192698.00 ± 0.01                | 0.01 ± 0.02                          | 0.01 ± 0.01                           | -0.17 ± 0.02                           | 0.19 ± 0.02                            |
|                                  | badq | -192712.32 ± 0.00                | 0.01 ± 0.02                          | 0.03 ± 0.02                           | -0.21 ± 0.02                           | 0.26 ± 0.02                            |

Table 30: MM-to-QM gas-phase solvation free energy correction values from 6- $\lambda$  states simulated for 100 ps

| Molec.                                       | MM'  | $\Delta G_{\text{TI3}}^{N_\lambda=11}$ | $\Delta\Delta G_{\text{TI}}^{N_\lambda=6}$ | $\Delta\Delta G_{\text{BAR}}^{N_\lambda=6}$ | $\Delta\Delta G_{\text{IEXP}}^{N_\lambda=5}$ | $\Delta\Delta G_{\text{DEXP}}^{N_\lambda=5}$ |
|----------------------------------------------|------|----------------------------------------|--------------------------------------------|---------------------------------------------|----------------------------------------------|----------------------------------------------|
| CO <sub>3</sub> <sup>2-</sup>                |      | -165234.08 ± 0.05                      | 0.02 ± 0.15                                | 0.08 ± 0.18                                 | -2.33 ± 0.24                                 | 2.43 ± 0.25                                  |
|                                              | b    | -165233.97 ± 0.00                      | 0.12 ± 0.02                                | 0.12 ± 0.01                                 | 0.08 ± 0.02                                  | 0.15 ± 0.02                                  |
|                                              | ba   | -165298.74 ± 0.00                      | 0.04 ± 0.01                                | 0.04 ± 0.01                                 | 0.01 ± 0.01                                  | 0.06 ± 0.04                                  |
|                                              | bad  | -165350.72 ± 0.00                      | 0.03 ± 0.01                                | 0.02 ± 0.01                                 | 0.01 ± 0.01                                  | 0.03 ± 0.02                                  |
|                                              | badq | -165337.39 ± 0.00                      | 0.02 ± 0.01                                | 0.02 ± 0.01                                 | 0.01 ± 0.01                                  | 0.02 ± 0.01                                  |
| CH <sub>3</sub> NH <sub>3</sub> <sup>+</sup> |      | -60350.21 ± 0.02                       | -0.03 ± 0.05                               | -0.04 ± 0.04                                | -0.04 ± 0.08                                 | -0.05 ± 0.08                                 |
|                                              | b    | -60350.95 ± 0.01                       | -0.01 ± 0.03                               | -0.01 ± 0.03                                | -0.01 ± 0.04                                 | -0.02 ± 0.05                                 |
|                                              | ba   | -60353.33 ± 0.01                       | 0.06 ± 0.02                                | 0.07 ± 0.01                                 | 0.05 ± 0.02                                  | 0.09 ± 0.02                                  |
|                                              | bad  | -60353.51 ± 0.01                       | 0.02 ± 0.02                                | 0.01 ± 0.01                                 | 0.00 ± 0.03                                  | 0.03 ± 0.03                                  |
|                                              | badq | -60350.03 ± 0.01                       | -0.04 ± 0.02                               | -0.04 ± 0.02                                | -0.03 ± 0.03                                 | -0.04 ± 0.03                                 |
| NH <sub>4</sub> <sup>+</sup>                 |      | -35656.21 ± 0.00                       | 0.04 ± 0.01                                | 0.04 ± 0.01                                 | 0.04 ± 0.01                                  | 0.04 ± 0.01                                  |
|                                              | b    | -35656.29 ± 0.00                       | 0.02 ± 0.01                                | 0.02 ± 0.00                                 | 0.02 ± 0.01                                  | 0.03 ± 0.01                                  |
|                                              | ba   | -35657.44 ± 0.00                       | 0.01 ± 0.01                                | 0.01 ± 0.00                                 | 0.01 ± 0.01                                  | 0.01 ± 0.01                                  |
|                                              | bad  | -35657.44 ± 0.00                       | 0.01 ± 0.01                                | 0.01 ± 0.00                                 | 0.01 ± 0.01                                  | 0.01 ± 0.01                                  |
|                                              | badq | -35656.32 ± 0.00                       | 0.00 ± 0.01                                | 0.00 ± 0.00                                 | 0.00 ± 0.01                                  | 0.01 ± 0.01                                  |
| CH <sub>3</sub> CO <sub>2</sub> <sup>-</sup> |      | -143225.98 ± 0.03                      | 0.01 ± 0.09                                | 0.02 ± 0.08                                 | -0.18 ± 0.10                                 | 0.20 ± 0.09                                  |
|                                              | b    | -143225.39 ± 0.02                      | 0.10 ± 0.06                                | 0.09 ± 0.04                                 | -0.05 ± 0.07                                 | 0.21 ± 0.06                                  |
|                                              | ba   | -143274.83 ± 0.02                      | 0.11 ± 0.04                                | 0.12 ± 0.04                                 | 0.11 ± 0.05                                  | 0.12 ± 0.05                                  |
|                                              | bad  | -143279.87 ± 0.02                      | 0.14 ± 0.05                                | 0.14 ± 0.04                                 | 0.10 ± 0.05                                  | 0.17 ± 0.06                                  |
|                                              | badq | -143295.75 ± 0.02                      | 0.11 ± 0.04                                | 0.11 ± 0.04                                 | 0.07 ± 0.05                                  | 0.13 ± 0.06                                  |
| H <sub>3</sub> O <sup>+</sup>                |      | -48069.23 ± 0.01                       | -0.07 ± 0.04                               | -0.07 ± 0.03                                | -0.24 ± 0.04                                 | 0.09 ± 0.06                                  |
|                                              | b    | -48069.30 ± 0.01                       | -0.08 ± 0.05                               | -0.08 ± 0.03                                | -0.19 ± 0.04                                 | 0.00 ± 0.05                                  |
|                                              | ba   | -48069.33 ± 0.00                       | 0.03 ± 0.01                                | 0.03 ± 0.01                                 | 0.01 ± 0.01                                  | 0.05 ± 0.01                                  |

*Continued on next page*

Table 30 – *Continued from previous page*

| Molec.                            | MM'  | $\Delta G_{\text{TI3}}^{N_i=11}$ | $\Delta\Delta G_{\text{TI}}^{N_i=6}$ | $\Delta\Delta G_{\text{BAR}}^{N_i=6}$ | $\Delta\Delta G_{\text{IEXP}}^{N_i=5}$ | $\Delta\Delta G_{\text{DEXP}}^{N_i=5}$ |
|-----------------------------------|------|----------------------------------|--------------------------------------|---------------------------------------|----------------------------------------|----------------------------------------|
|                                   | bad  | -48069.33 ± 0.00                 | 0.03 ± 0.01                          | 0.03 ± 0.01                           | 0.01 ± 0.01                            | 0.05 ± 0.01                            |
|                                   | badq | -48069.38 ± 0.00                 | 0.02 ± 0.01                          | 0.02 ± 0.01                           | 0.01 ± 0.01                            | 0.04 ± 0.01                            |
| C <sub>6</sub> H <sub>5</sub> Cl  |      | -433852.25 ± 0.02                | -0.05 ± 0.05                         | -0.04 ± 0.04                          | 0.03 ± 0.05                            | -0.09 ± 0.06                           |
|                                   | b    | -433850.13 ± 0.01                | -0.10 ± 0.03                         | -0.09 ± 0.03                          | -0.07 ± 0.04                           | -0.10 ± 0.04                           |
|                                   | ba   | -433853.89 ± 0.01                | 0.07 ± 0.03                          | 0.06 ± 0.02                           | 0.05 ± 0.03                            | 0.07 ± 0.03                            |
|                                   | bad  | -433855.52 ± 0.01                | 0.00 ± 0.02                          | 0.01 ± 0.02                           | -0.03 ± 0.03                           | 0.04 ± 0.03                            |
|                                   | badq | -433858.60 ± 0.01                | 0.05 ± 0.02                          | 0.04 ± 0.02                           | 0.04 ± 0.03                            | 0.05 ± 0.03                            |
| C <sub>6</sub> H <sub>14</sub>    |      | -148579.56 ± 0.01                | -0.01 ± 0.02                         | 0.00 ± 0.02                           | -0.14 ± 0.03                           | 0.14 ± 0.03                            |
|                                   | b    | -148580.35 ± 0.01                | 0.04 ± 0.02                          | 0.04 ± 0.02                           | -0.04 ± 0.03                           | 0.12 ± 0.02                            |
|                                   | ba   | -148579.69 ± 0.01                | 0.02 ± 0.02                          | 0.02 ± 0.01                           | -0.03 ± 0.02                           | 0.08 ± 0.02                            |
|                                   | bad  | -148579.55 ± 0.01                | 0.10 ± 0.02                          | 0.10 ± 0.01                           | 0.03 ± 0.02                            | 0.16 ± 0.02                            |
|                                   | badq | -148577.13 ± 0.01                | 0.02 ± 0.02                          | 0.03 ± 0.01                           | -0.05 ± 0.02                           | 0.10 ± 0.02                            |
| CH <sub>3</sub> OH                |      | -72528.21 ± 0.01                 | 0.01 ± 0.02                          | 0.01 ± 0.01                           | -0.09 ± 0.02                           | 0.10 ± 0.02                            |
|                                   | b    | -72528.26 ± 0.01                 | 0.00 ± 0.02                          | 0.00 ± 0.01                           | -0.08 ± 0.02                           | 0.08 ± 0.02                            |
|                                   | ba   | -72528.29 ± 0.01                 | 0.03 ± 0.02                          | 0.03 ± 0.01                           | -0.06 ± 0.06                           | 0.12 ± 0.06                            |
|                                   | bad  | -72528.28 ± 0.01                 | -0.06 ± 0.01                         | -0.05 ± 0.01                          | -0.15 ± 0.02                           | 0.04 ± 0.02                            |
|                                   | badq | -72528.80 ± 0.01                 | 0.12 ± 0.01                          | 0.11 ± 0.01                           | 0.02 ± 0.02                            | 0.21 ± 0.02                            |
| C <sub>2</sub> H <sub>6</sub>     |      | -50024.21 ± 0.00                 | 0.02 ± 0.01                          | 0.02 ± 0.01                           | 0.00 ± 0.01                            | 0.04 ± 0.01                            |
|                                   | b    | -50024.36 ± 0.00                 | 0.01 ± 0.01                          | 0.01 ± 0.01                           | 0.00 ± 0.01                            | 0.02 ± 0.01                            |
|                                   | ba   | -50024.20 ± 0.00                 | 0.03 ± 0.00                          | 0.02 ± 0.00                           | 0.03 ± 0.01                            | 0.02 ± 0.01                            |
|                                   | bad  | -50024.28 ± 0.00                 | 0.03 ± 0.00                          | 0.03 ± 0.00                           | 0.03 ± 0.01                            | 0.03 ± 0.01                            |
|                                   | badq | -50024.44 ± 0.00                 | 0.02 ± 0.00                          | 0.02 ± 0.00                           | 0.02 ± 0.01                            | 0.02 ± 0.01                            |
| (CH <sub>2</sub> ) <sub>4</sub> O |      | -145699.56 ± 0.02                | -0.07 ± 0.04                         | -0.04 ± 0.04                          | -0.41 ± 0.05                           | 0.30 ± 0.05                            |
|                                   | b    | -145699.47 ± 0.02                | 0.11 ± 0.06                          | 0.11 ± 0.05                           | -0.20 ± 0.07                           | 0.41 ± 0.08                            |

*Continued on next page*



Table 30 – *Continued from previous page*

| Molec.                                        | MM'  | $\Delta G_{\text{TI3}}^{N_i=11}$ | $\Delta\Delta G_{\text{TI}}^{N_i=6}$ | $\Delta\Delta G_{\text{BAR}}^{N_i=6}$ | $\Delta\Delta G_{\text{IEXP}}^{N_i=5}$ | $\Delta\Delta G_{\text{DEXP}}^{N_i=5}$ |
|-----------------------------------------------|------|----------------------------------|--------------------------------------|---------------------------------------|----------------------------------------|----------------------------------------|
| C(NH <sub>2</sub> ) <sub>3</sub> <sup>+</sup> | ba   | -145697.65 ± 0.01                | 0.08 ± 0.03                          | 0.08 ± 0.02                           | 0.00 ± 0.03                            | 0.16 ± 0.03                            |
|                                               | bad  | -145698.65 ± 0.01                | 0.06 ± 0.02                          | 0.07 ± 0.02                           | -0.05 ± 0.03                           | 0.18 ± 0.03                            |
|                                               | badq | -145689.76 ± 0.01                | -0.09 ± 0.03                         | -0.09 ± 0.02                          | -0.15 ± 0.03                           | -0.02 ± 0.03                           |
|                                               |      | -128901.22 ± 0.03                | 0.17 ± 0.09                          | 0.08 ± 0.09                           | -0.11 ± 0.09                           | 0.10 ± 0.13                            |
|                                               | b    | -128902.74 ± 0.03                | 0.15 ± 0.09                          | 0.08 ± 0.09                           | -0.18 ± 0.11                           | 0.12 ± 0.15                            |
|                                               | ba   | -128929.38 ± 0.03                | 0.06 ± 0.07                          | 0.03 ± 0.09                           | -0.17 ± 0.10                           | 0.12 ± 0.11                            |
|                                               | bad  | -128932.44 ± 0.02                | 0.01 ± 0.04                          | 0.03 ± 0.07                           | -0.08 ± 0.09                           | 0.10 ± 0.10                            |
| C <sub>6</sub> H <sub>5</sub> NH <sub>2</sub> | badq | -128914.70 ± 0.02                | 0.11 ± 0.04                          | 0.11 ± 0.04                           | 0.04 ± 0.06                            | 0.14 ± 0.06                            |
|                                               |      | -180227.49 ± 0.01                | 0.04 ± 0.03                          | 0.03 ± 0.02                           | -0.21 ± 0.03                           | 0.28 ± 0.03                            |
|                                               | b    | -180227.72 ± 0.01                | 0.00 ± 0.02                          | 0.00 ± 0.02                           | -0.23 ± 0.03                           | 0.22 ± 0.03                            |
|                                               | ba   | -180232.65 ± 0.01                | 0.03 ± 0.02                          | 0.03 ± 0.01                           | -0.05 ± 0.02                           | 0.11 ± 0.02                            |
|                                               | bad  | -180231.64 ± 0.01                | 0.05 ± 0.01                          | 0.05 ± 0.01                           | -0.03 ± 0.02                           | 0.13 ± 0.02                            |
|                                               | badq | -180261.12 ± 0.01                | 0.05 ± 0.02                          | 0.06 ± 0.02                           | -0.09 ± 0.02                           | 0.21 ± 0.03                            |
|                                               |      | -131075.55 ± 0.01                | -0.05 ± 0.02                         | -0.05 ± 0.02                          | -0.23 ± 0.02                           | 0.13 ± 0.02                            |
| CH <sub>3</sub> CONH <sub>2</sub>             | b    | -131075.53 ± 0.01                | -0.09 ± 0.02                         | -0.09 ± 0.02                          | -0.34 ± 0.03                           | 0.15 ± 0.03                            |
|                                               | ba   | -131080.95 ± 0.01                | -0.05 ± 0.01                         | -0.05 ± 0.01                          | -0.19 ± 0.02                           | 0.09 ± 0.02                            |
|                                               | bad  | -131081.99 ± 0.01                | -0.03 ± 0.02                         | -0.03 ± 0.01                          | -0.17 ± 0.02                           | 0.11 ± 0.02                            |
|                                               | badq | -131071.90 ± 0.01                | 0.01 ± 0.01                          | 0.00 ± 0.01                           | -0.15 ± 0.02                           | 0.15 ± 0.02                            |
|                                               |      | -47893.37 ± 0.00                 | 0.00 ± 0.00                          | 0.00 ± 0.00                           | -0.04 ± 0.00                           | 0.04 ± 0.00                            |
| H <sub>2</sub> O                              | b    | -47893.41 ± 0.00                 | 0.00 ± 0.00                          | 0.00 ± 0.00                           | -0.03 ± 0.01                           | 0.03 ± 0.01                            |
|                                               | ba   | -47893.40 ± 0.00                 | 0.00 ± 0.01                          | 0.00 ± 0.01                           | -0.07 ± 0.01                           | 0.06 ± 0.01                            |
|                                               | bad  | -47893.40 ± 0.00                 | 0.00 ± 0.01                          | 0.00 ± 0.01                           | -0.07 ± 0.01                           | 0.06 ± 0.01                            |
|                                               | badq | -47893.40 ± 0.00                 | 0.00 ± 0.01                          | 0.00 ± 0.01                           | -0.07 ± 0.01                           | 0.06 ± 0.01                            |
|                                               |      | -47893.40 ± 0.00                 | 0.00 ± 0.01                          | 0.00 ± 0.01                           | -0.07 ± 0.01                           | 0.06 ± 0.01                            |
| C <sub>2</sub> H <sub>5</sub> OH              |      | -97162.98 ± 0.01                 | 0.02 ± 0.01                          | 0.02 ± 0.01                           | -0.07 ± 0.01                           | 0.10 ± 0.02                            |

*Continued on next page*

Table 30 – *Continued from previous page*

| Molec.                           | MM'  | $\Delta G_{\text{TI3}}^{N_i=11}$ | $\Delta\Delta G_{\text{TI}}^{N_i=6}$ | $\Delta\Delta G_{\text{BAR}}^{N_i=6}$ | $\Delta\Delta G_{\text{IEXP}}^{N_i=5}$ | $\Delta\Delta G_{\text{DEXP}}^{N_i=5}$ |
|----------------------------------|------|----------------------------------|--------------------------------------|---------------------------------------|----------------------------------------|----------------------------------------|
|                                  | b    | -97163.06 ± 0.00                 | 0.01 ± 0.01                          | 0.01 ± 0.01                           | -0.04 ± 0.01                           | 0.05 ± 0.01                            |
|                                  | ba   | -97163.47 ± 0.01                 | 0.02 ± 0.03                          | 0.03 ± 0.02                           | -0.12 ± 0.03                           | 0.16 ± 0.03                            |
|                                  | bad  | -97163.66 ± 0.01                 | 0.00 ± 0.02                          | 0.00 ± 0.02                           | -0.15 ± 0.02                           | 0.14 ± 0.03                            |
|                                  | badq | -97163.34 ± 0.01                 | -0.02 ± 0.02                         | -0.01 ± 0.02                          | -0.16 ± 0.02                           | 0.12 ± 0.03                            |
| C <sub>6</sub> H <sub>6</sub>    |      | -145560.00 ± 0.01                | 0.00 ± 0.01                          | 0.00 ± 0.01                           | -0.09 ± 0.01                           | 0.10 ± 0.01                            |
|                                  | b    | -145560.43 ± 0.00                | -0.02 ± 0.01                         | -0.02 ± 0.01                          | -0.05 ± 0.01                           | 0.01 ± 0.01                            |
|                                  | ba   | -145565.77 ± 0.00                | 0.01 ± 0.01                          | 0.01 ± 0.01                           | -0.03 ± 0.02                           | 0.04 ± 0.02                            |
|                                  | bad  | -145564.02 ± 0.00                | -0.05 ± 0.01                         | -0.05 ± 0.01                          | -0.07 ± 0.01                           | -0.03 ± 0.01                           |
|                                  | badq | -145563.39 ± 0.00                | 0.03 ± 0.01                          | 0.03 ± 0.01                           | 0.01 ± 0.01                            | 0.06 ± 0.01                            |
| C <sub>6</sub> H <sub>5</sub> OH |      | -192693.96 ± 0.01                | -0.01 ± 0.02                         | -0.01 ± 0.01                          | -0.16 ± 0.02                           | 0.13 ± 0.02                            |
|                                  | b    | -192694.26 ± 0.01                | 0.01 ± 0.01                          | 0.01 ± 0.01                           | -0.08 ± 0.01                           | 0.11 ± 0.02                            |
|                                  | ba   | -192699.45 ± 0.00                | 0.00 ± 0.01                          | 0.00 ± 0.01                           | -0.08 ± 0.01                           | 0.08 ± 0.01                            |
|                                  | bad  | -192698.00 ± 0.01                | 0.01 ± 0.01                          | 0.01 ± 0.01                           | -0.06 ± 0.02                           | 0.08 ± 0.02                            |
|                                  | badq | -192712.32 ± 0.00                | 0.01 ± 0.01                          | 0.02 ± 0.01                           | -0.08 ± 0.01                           | 0.11 ± 0.01                            |

Table 31: MM-to-QM gas-phase solvation free energy correction values from 2- $\lambda$  states simulated for 50 ps

| Molec.                     | MM'  | $\Delta G_{\text{TI3}}^{N_\lambda=11}$ | $\Delta\Delta G_{\text{TI}}^{N_\lambda=2}$ | $\Delta\Delta G_{\text{BAR}}^{N_\lambda=2}$ | $\Delta\Delta G_{\text{IEXP}}^{N_\lambda=1}$ | $\Delta\Delta G_{\text{DEXP}}^{N_\lambda=1}$ |
|----------------------------|------|----------------------------------------|--------------------------------------------|---------------------------------------------|----------------------------------------------|----------------------------------------------|
| $\text{CO}_3^{2-}$         |      | $-165234.08 \pm 0.05$                  | $3.47 \pm 0.56$                            | $1.69 \pm 0.53$                             | $-11.03 \pm 0.21$                            | $14.41 \pm 0.49$                             |
|                            | b    | $-165233.97 \pm 0.00$                  | $0.36 \pm 0.07$                            | $0.30 \pm 0.07$                             | $0.02 \pm 0.06$                              | $0.44 \pm 0.09$                              |
|                            | ba   | $-165298.74 \pm 0.00$                  | $-0.18 \pm 0.02$                           | $-0.18 \pm 0.04$                            | $-0.03 \pm 0.05$                             | $-0.27 \pm 0.06$                             |
|                            | bad  | $-165350.72 \pm 0.00$                  | $0.06 \pm 0.05$                            | $0.04 \pm 0.04$                             | $-0.04 \pm 0.04$                             | $0.01 \pm 0.06$                              |
|                            | badq | $-165337.39 \pm 0.00$                  | $0.11 \pm 0.04$                            | $0.09 \pm 0.04$                             | $0.04 \pm 0.04$                              | $0.05 \pm 0.06$                              |
| $\text{CH}_3\text{NH}_3^+$ |      | $-60350.21 \pm 0.02$                   | $0.16 \pm 0.12$                            | $-0.02 \pm 0.12$                            | $-0.34 \pm 0.17$                             | $0.42 \pm 0.11$                              |
|                            | b    | $-60350.95 \pm 0.01$                   | $0.10 \pm 0.09$                            | $0.02 \pm 0.13$                             | $0.08 \pm 0.12$                              | $-0.06 \pm 0.29$                             |
|                            | ba   | $-60353.33 \pm 0.01$                   | $0.15 \pm 0.05$                            | $0.13 \pm 0.06$                             | $0.01 \pm 0.06$                              | $0.20 \pm 0.08$                              |
|                            | bad  | $-60353.51 \pm 0.01$                   | $-0.11 \pm 0.05$                           | $-0.11 \pm 0.05$                            | $-0.18 \pm 0.06$                             | $-0.06 \pm 0.07$                             |
|                            | badq | $-60350.03 \pm 0.01$                   | $-0.14 \pm 0.05$                           | $-0.15 \pm 0.05$                            | $-0.16 \pm 0.09$                             | $-0.12 \pm 0.06$                             |
| $\text{NH}_4^+$            |      | $-35656.21 \pm 0.00$                   | $0.06 \pm 0.02$                            | $0.06 \pm 0.02$                             | $0.03 \pm 0.02$                              | $0.08 \pm 0.02$                              |
|                            | b    | $-35656.29 \pm 0.00$                   | $0.04 \pm 0.01$                            | $0.04 \pm 0.02$                             | $0.03 \pm 0.02$                              | $0.06 \pm 0.05$                              |
|                            | ba   | $-35657.44 \pm 0.00$                   | $-0.01 \pm 0.01$                           | $-0.01 \pm 0.02$                            | $0.01 \pm 0.02$                              | $-0.03 \pm 0.03$                             |
|                            | bad  | $-35657.44 \pm 0.00$                   | $-0.01 \pm 0.01$                           | $-0.01 \pm 0.02$                            | $0.01 \pm 0.02$                              | $-0.03 \pm 0.03$                             |
|                            | badq | $-35656.32 \pm 0.00$                   | $0.00 \pm 0.01$                            | $0.00 \pm 0.01$                             | $0.00 \pm 0.02$                              | $0.00 \pm 0.02$                              |
| $\text{CH}_3\text{CO}_2^-$ |      | $-143225.98 \pm 0.03$                  | $0.96 \pm 0.30$                            | $0.14 \pm 0.38$                             | $-1.06 \pm 0.25$                             | $0.80 \pm 0.43$                              |
|                            | b    | $-143225.39 \pm 0.02$                  | $0.23 \pm 0.19$                            | $0.30 \pm 0.21$                             | $-0.07 \pm 0.25$                             | $0.65 \pm 0.27$                              |
|                            | ba   | $-143274.83 \pm 0.02$                  | $0.28 \pm 0.10$                            | $0.18 \pm 0.16$                             | $-0.41 \pm 0.16$                             | $0.37 \pm 0.22$                              |
|                            | bad  | $-143279.87 \pm 0.02$                  | $0.25 \pm 0.12$                            | $0.32 \pm 0.13$                             | $0.04 \pm 0.14$                              | $0.43 \pm 0.23$                              |
|                            | badq | $-143295.75 \pm 0.02$                  | $0.24 \pm 0.12$                            | $0.29 \pm 0.12$                             | $0.46 \pm 0.21$                              | $-0.03 \pm 0.27$                             |
| $\text{H}_3\text{O}^+$     |      | $-48069.23 \pm 0.01$                   | $0.08 \pm 0.16$                            | $-0.04 \pm 0.23$                            | $-0.07 \pm 0.51$                             | $0.22 \pm 0.20$                              |
|                            | b    | $-48069.30 \pm 0.01$                   | $-0.12 \pm 0.14$                           | $-0.29 \pm 0.15$                            | $-0.67 \pm 0.14$                             | $-0.04 \pm 0.16$                             |
|                            | ba   | $-48069.33 \pm 0.00$                   | $0.07 \pm 0.04$                            | $0.07 \pm 0.04$                             | $0.02 \pm 0.05$                              | $0.11 \pm 0.05$                              |

*Continued on next page*

Table 31 – *Continued from previous page*

| Molec.                            | MM'  | $\Delta G_{\text{TI3}}^{N_i=11}$ | $\Delta \Delta G_{\text{TI}}^{N_i=2}$ | $\Delta \Delta G_{\text{BAR}}^{N_i=2}$ | $\Delta \Delta G_{\text{IEXP}}^{N_i=1}$ | $\Delta \Delta G_{\text{DEXP}}^{N_i=1}$ |
|-----------------------------------|------|----------------------------------|---------------------------------------|----------------------------------------|-----------------------------------------|-----------------------------------------|
|                                   | bad  | -48069.33 ± 0.00                 | 0.07 ± 0.04                           | 0.07 ± 0.04                            | 0.02 ± 0.05                             | 0.11 ± 0.05                             |
|                                   | badq | -48069.38 ± 0.00                 | 0.02 ± 0.04                           | 0.02 ± 0.04                            | 0.03 ± 0.06                             | 0.00 ± 0.06                             |
| C <sub>6</sub> H <sub>5</sub> Cl  |      | -433852.25 ± 0.02                | 0.00 ± 0.13                           | -0.08 ± 0.11                           | 0.04 ± 0.18                             | -0.19 ± 0.18                            |
|                                   | b    | -433850.13 ± 0.01                | 0.02 ± 0.07                           | 0.03 ± 0.10                            | -0.13 ± 0.10                            | 0.18 ± 0.21                             |
|                                   | ba   | -433853.89 ± 0.01                | 0.17 ± 0.06                           | 0.16 ± 0.07                            | -0.04 ± 0.08                            | 0.32 ± 0.10                             |
|                                   | bad  | -433855.52 ± 0.01                | 0.08 ± 0.05                           | 0.06 ± 0.07                            | -0.25 ± 0.06                            | 0.20 ± 0.13                             |
|                                   | badq | -433858.60 ± 0.01                | -0.10 ± 0.06                          | -0.10 ± 0.08                           | -0.14 ± 0.12                            | -0.08 ± 0.08                            |
| C <sub>6</sub> H <sub>14</sub>    |      | -148579.56 ± 0.01                | -0.08 ± 0.07                          | 0.00 ± 0.11                            | -0.48 ± 0.16                            | 0.66 ± 0.11                             |
|                                   | b    | -148580.35 ± 0.01                | -0.12 ± 0.05                          | -0.12 ± 0.07                           | -0.54 ± 0.08                            | 0.33 ± 0.07                             |
|                                   | ba   | -148579.69 ± 0.01                | -0.03 ± 0.07                          | -0.06 ± 0.08                           | -0.35 ± 0.09                            | 0.16 ± 0.10                             |
|                                   | bad  | -148579.55 ± 0.01                | 0.00 ± 0.07                           | -0.02 ± 0.08                           | -0.35 ± 0.09                            | 0.26 ± 0.09                             |
|                                   | badq | -148577.13 ± 0.01                | 0.01 ± 0.06                           | 0.01 ± 0.07                            | -0.39 ± 0.08                            | 0.44 ± 0.07                             |
| CH <sub>3</sub> OH                |      | -72528.21 ± 0.01                 | 0.08 ± 0.06                           | 0.02 ± 0.07                            | -0.45 ± 0.04                            | 0.35 ± 0.09                             |
|                                   | b    | -72528.26 ± 0.01                 | 0.08 ± 0.05                           | 0.04 ± 0.06                            | -0.39 ± 0.04                            | 0.35 ± 0.09                             |
|                                   | ba   | -72528.29 ± 0.01                 | 0.13 ± 0.05                           | 0.09 ± 0.06                            | -0.39 ± 0.04                            | 0.46 ± 0.08                             |
|                                   | bad  | -72528.28 ± 0.01                 | 0.15 ± 0.05                           | 0.11 ± 0.06                            | -0.36 ± 0.04                            | 0.49 ± 0.07                             |
|                                   | badq | -72528.80 ± 0.01                 | 0.13 ± 0.04                           | 0.10 ± 0.06                            | -0.38 ± 0.03                            | 0.48 ± 0.07                             |
| C <sub>2</sub> H <sub>6</sub>     |      | -50024.21 ± 0.00                 | -0.02 ± 0.04                          | -0.02 ± 0.04                           | -0.11 ± 0.04                            | 0.01 ± 0.06                             |
|                                   | b    | -50024.36 ± 0.00                 | 0.01 ± 0.03                           | 0.01 ± 0.03                            | -0.04 ± 0.04                            | 0.06 ± 0.04                             |
|                                   | ba   | -50024.20 ± 0.00                 | 0.06 ± 0.01                           | 0.06 ± 0.01                            | 0.03 ± 0.02                             | 0.09 ± 0.02                             |
|                                   | bad  | -50024.28 ± 0.00                 | 0.06 ± 0.01                           | 0.06 ± 0.01                            | 0.02 ± 0.02                             | 0.10 ± 0.02                             |
|                                   | badq | -50024.44 ± 0.00                 | 0.06 ± 0.01                           | 0.06 ± 0.02                            | 0.02 ± 0.02                             | 0.11 ± 0.02                             |
| (CH <sub>2</sub> ) <sub>4</sub> O |      | -145699.56 ± 0.02                | 0.40 ± 0.11                           | 0.12 ± 0.29                            | -1.55 ± 0.24                            | 1.63 ± 0.33                             |
|                                   | b    | -145699.47 ± 0.02                | 0.82 ± 0.17                           | 0.19 ± 0.36                            | -1.75 ± 0.21                            | 2.02 ± 0.39                             |

*Continued on next page*

Table 31 – *Continued from previous page*

| Molec.                            | MM'  | $\Delta G_{\text{TI3}}^{N_i=11}$ | $\Delta \Delta G_{\text{TI}}^{N_i=2}$ | $\Delta \Delta G_{\text{BAR}}^{N_i=2}$ | $\Delta \Delta G_{\text{IEXP}}^{N_i=1}$ | $\Delta \Delta G_{\text{DEXP}}^{N_i=1}$ |
|-----------------------------------|------|----------------------------------|---------------------------------------|----------------------------------------|-----------------------------------------|-----------------------------------------|
|                                   | ba   | -145697.65 ± 0.01                | 0.23 ± 0.06                           | 0.20 ± 0.10                            | -0.46 ± 0.08                            | 0.81 ± 0.12                             |
|                                   | bad  | -145698.65 ± 0.01                | 0.27 ± 0.07                           | 0.19 ± 0.10                            | -0.50 ± 0.08                            | 0.78 ± 0.12                             |
|                                   | badq | -145689.76 ± 0.01                | 0.08 ± 0.08                           | 0.01 ± 0.09                            | -0.44 ± 0.08                            | 0.35 ± 0.12                             |
| $\text{C}(\text{NH}_2)_3^+$       |      | -128901.22 ± 0.03                | 3.35 ± 0.55                           | 0.69 ± 0.43                            | 0.01 ± 0.30                             | 1.06 ± 0.38                             |
|                                   | b    | -128902.74 ± 0.03                | 2.78 ± 0.41                           | 0.80 ± 0.39                            | -0.06 ± 0.49                            | 1.74 ± 0.34                             |
|                                   | ba   | -128929.38 ± 0.03                | 1.87 ± 0.32                           | 0.70 ± 0.26                            | -0.07 ± 0.16                            | 0.62 ± 0.41                             |
|                                   | bad  | -128932.44 ± 0.02                | 0.92 ± 0.20                           | 0.38 ± 0.17                            | -0.26 ± 0.09                            | -0.24 ± 0.44                            |
|                                   | badq | -128914.70 ± 0.02                | 0.39 ± 0.14                           | 0.09 ± 0.14                            | -0.44 ± 0.13                            | 0.31 ± 0.18                             |
| $\text{C}_6\text{H}_5\text{NH}_2$ |      | -180227.49 ± 0.01                | -0.24 ± 0.08                          | -0.29 ± 0.17                           | -1.62 ± 0.15                            | 0.96 ± 0.15                             |
|                                   | b    | -180227.72 ± 0.01                | -0.07 ± 0.07                          | -0.08 ± 0.13                           | -1.22 ± 0.11                            | 1.03 ± 0.11                             |
|                                   | ba   | -180232.65 ± 0.01                | 0.13 ± 0.04                           | 0.11 ± 0.05                            | -0.44 ± 0.04                            | 0.64 ± 0.07                             |
|                                   | bad  | -180231.64 ± 0.01                | 0.04 ± 0.04                           | 0.01 ± 0.06                            | -0.45 ± 0.05                            | 0.41 ± 0.09                             |
|                                   | badq | -180261.12 ± 0.01                | 0.24 ± 0.06                           | 0.17 ± 0.10                            | -0.60 ± 0.07                            | 0.81 ± 0.12                             |
| $\text{CH}_3\text{CONH}_2$        |      | -131075.55 ± 0.01                | -0.17 ± 0.05                          | -0.11 ± 0.08                           | -0.98 ± 0.09                            | 0.80 ± 0.06                             |
|                                   | b    | -131075.53 ± 0.01                | -0.19 ± 0.08                          | -0.28 ± 0.14                           | -1.40 ± 0.10                            | 0.71 ± 0.15                             |
|                                   | ba   | -131080.95 ± 0.01                | -0.14 ± 0.04                          | -0.15 ± 0.07                           | -0.83 ± 0.07                            | 0.51 ± 0.07                             |
|                                   | bad  | -131081.99 ± 0.01                | -0.11 ± 0.04                          | -0.11 ± 0.07                           | -0.81 ± 0.07                            | 0.57 ± 0.06                             |
|                                   | badq | -131071.90 ± 0.01                | -0.18 ± 0.05                          | -0.22 ± 0.08                           | -0.85 ± 0.07                            | 0.34 ± 0.09                             |
| $\text{H}_2\text{O}$              |      | -47893.37 ± 0.00                 | 0.05 ± 0.01                           | 0.05 ± 0.02                            | -0.12 ± 0.02                            | 0.21 ± 0.02                             |
|                                   | b    | -47893.41 ± 0.00                 | 0.02 ± 0.01                           | 0.02 ± 0.02                            | -0.12 ± 0.01                            | 0.16 ± 0.03                             |
|                                   | ba   | -47893.40 ± 0.00                 | 0.03 ± 0.02                           | 0.02 ± 0.05                            | -0.26 ± 0.04                            | 0.27 ± 0.06                             |
|                                   | bad  | -47893.40 ± 0.00                 | 0.03 ± 0.02                           | 0.02 ± 0.05                            | -0.26 ± 0.04                            | 0.27 ± 0.06                             |
|                                   | badq | -47893.40 ± 0.00                 | 0.03 ± 0.02                           | 0.02 ± 0.05                            | -0.26 ± 0.04                            | 0.27 ± 0.06                             |
| $\text{C}_2\text{H}_5\text{OH}$   |      | -97162.98 ± 0.01                 | 0.09 ± 0.04                           | 0.06 ± 0.05                            | -0.40 ± 0.04                            | 0.44 ± 0.07                             |

*Continued on next page*

Table 31 – *Continued from previous page*

| Molec.                           | MM'  | $\Delta G_{\text{TI3}}^{N_{\lambda}=11}$ | $\Delta\Delta G_{\text{TI}}^{N_{\lambda}=2}$ | $\Delta\Delta G_{\text{BAR}}^{N_{\lambda}=2}$ | $\Delta\Delta G_{\text{IEXP}}^{N_{\lambda}=1}$ | $\Delta\Delta G_{\text{DEXP}}^{N_{\lambda}=1}$ |
|----------------------------------|------|------------------------------------------|----------------------------------------------|-----------------------------------------------|------------------------------------------------|------------------------------------------------|
|                                  | b    | -97163.06 ± 0.00                         | 0.07 ± 0.04                                  | 0.06 ± 0.04                                   | -0.21 ± 0.03                                   | 0.27 ± 0.06                                    |
|                                  | ba   | -97163.47 ± 0.01                         | 0.13 ± 0.09                                  | -0.09 ± 0.10                                  | -0.82 ± 0.04                                   | 0.40 ± 0.13                                    |
|                                  | bad  | -97163.66 ± 0.01                         | 0.11 ± 0.07                                  | -0.05 ± 0.10                                  | -0.85 ± 0.05                                   | 0.54 ± 0.14                                    |
|                                  | badq | -97163.34 ± 0.01                         | 0.04 ± 0.07                                  | -0.10 ± 0.09                                  | -0.77 ± 0.04                                   | 0.37 ± 0.11                                    |
| C <sub>6</sub> H <sub>6</sub>    |      | -145560.00 ± 0.01                        | 0.01 ± 0.03                                  | 0.01 ± 0.04                                   | -0.48 ± 0.04                                   | 0.50 ± 0.04                                    |
|                                  | b    | -145560.43 ± 0.00                        | -0.01 ± 0.02                                 | -0.01 ± 0.02                                  | -0.19 ± 0.02                                   | 0.18 ± 0.03                                    |
|                                  | ba   | -145565.77 ± 0.00                        | -0.04 ± 0.02                                 | -0.04 ± 0.02                                  | -0.27 ± 0.02                                   | 0.17 ± 0.03                                    |
|                                  | bad  | -145564.02 ± 0.00                        | -0.07 ± 0.02                                 | -0.07 ± 0.02                                  | -0.21 ± 0.02                                   | 0.07 ± 0.02                                    |
|                                  | badq | -145563.39 ± 0.00                        | -0.05 ± 0.02                                 | -0.05 ± 0.02                                  | -0.16 ± 0.02                                   | 0.04 ± 0.03                                    |
| C <sub>6</sub> H <sub>5</sub> OH |      | -192693.96 ± 0.01                        | 0.03 ± 0.05                                  | 0.01 ± 0.07                                   | -0.70 ± 0.06                                   | 0.70 ± 0.07                                    |
|                                  | b    | -192694.26 ± 0.01                        | 0.02 ± 0.04                                  | 0.02 ± 0.06                                   | -0.41 ± 0.06                                   | 0.44 ± 0.07                                    |
|                                  | ba   | -192699.45 ± 0.00                        | 0.05 ± 0.04                                  | 0.04 ± 0.04                                   | -0.29 ± 0.04                                   | 0.34 ± 0.05                                    |
|                                  | bad  | -192698.00 ± 0.01                        | 0.04 ± 0.03                                  | 0.04 ± 0.04                                   | -0.28 ± 0.04                                   | 0.33 ± 0.05                                    |
|                                  | badq | -192712.32 ± 0.00                        | 0.12 ± 0.02                                  | 0.12 ± 0.04                                   | -0.36 ± 0.05                                   | 0.59 ± 0.05                                    |

Table 32: MM-to-QM gas-phase solvation free energy correction values from 3- $\lambda$  states simulated for 50 ps

| Molec.                                       | MM'  | $\Delta G_{\text{TI3}}^{N_\lambda=11}$ | $\Delta\Delta G_{\text{TI}}^{N_\lambda=3}$ | $\Delta\Delta G_{\text{BAR}}^{N_\lambda=3}$ | $\Delta\Delta G_{\text{IEXP}}^{N_\lambda=2}$ | $\Delta\Delta G_{\text{DEXP}}^{N_\lambda=2}$ |
|----------------------------------------------|------|----------------------------------------|--------------------------------------------|---------------------------------------------|----------------------------------------------|----------------------------------------------|
| CO <sub>3</sub> <sup>2-</sup>                |      | -165234.08 ± 0.05                      | 0.62 ± 0.47                                | 0.56 ± 0.48                                 | -4.19 ± 0.31                                 | 5.16 ± 0.38                                  |
|                                              | b    | -165233.97 ± 0.00                      | 0.36 ± 0.05                                | 0.35 ± 0.04                                 | 0.21 ± 0.05                                  | 0.43 ± 0.06                                  |
|                                              | ba   | -165298.74 ± 0.00                      | -0.07 ± 0.04                               | -0.10 ± 0.04                                | 0.00 ± 0.04                                  | -0.17 ± 0.04                                 |
|                                              | bad  | -165350.72 ± 0.00                      | 0.05 ± 0.03                                | 0.05 ± 0.03                                 | 0.02 ± 0.03                                  | 0.05 ± 0.04                                  |
|                                              | badq | -165337.39 ± 0.00                      | 0.10 ± 0.03                                | 0.10 ± 0.03                                 | 0.07 ± 0.03                                  | 0.09 ± 0.04                                  |
| CH <sub>3</sub> NH <sub>3</sub> <sup>+</sup> |      | -60350.21 ± 0.02                       | 0.06 ± 0.12                                | 0.04 ± 0.09                                 | -0.05 ± 0.12                                 | 0.12 ± 0.11                                  |
|                                              | b    | -60350.95 ± 0.01                       | -0.07 ± 0.06                               | -0.05 ± 0.10                                | -0.08 ± 0.11                                 | -0.06 ± 0.17                                 |
|                                              | ba   | -60353.33 ± 0.01                       | 0.09 ± 0.05                                | 0.10 ± 0.04                                 | 0.04 ± 0.06                                  | 0.14 ± 0.06                                  |
|                                              | bad  | -60353.51 ± 0.01                       | -0.07 ± 0.03                               | -0.08 ± 0.03                                | -0.13 ± 0.04                                 | -0.03 ± 0.04                                 |
|                                              | badq | -60350.03 ± 0.01                       | -0.12 ± 0.05                               | -0.12 ± 0.04                                | -0.13 ± 0.06                                 | -0.11 ± 0.08                                 |
| NH <sub>4</sub> <sup>+</sup>                 |      | -35656.21 ± 0.00                       | 0.10 ± 0.02                                | 0.10 ± 0.01                                 | 0.08 ± 0.01                                  | 0.10 ± 0.02                                  |
|                                              | b    | -35656.29 ± 0.00                       | 0.04 ± 0.02                                | 0.04 ± 0.02                                 | 0.03 ± 0.02                                  | 0.05 ± 0.03                                  |
|                                              | ba   | -35657.44 ± 0.00                       | 0.01 ± 0.01                                | 0.01 ± 0.01                                 | 0.02 ± 0.01                                  | 0.00 ± 0.02                                  |
|                                              | bad  | -35657.44 ± 0.00                       | 0.01 ± 0.01                                | 0.01 ± 0.01                                 | 0.02 ± 0.01                                  | 0.00 ± 0.02                                  |
|                                              | badq | -35656.32 ± 0.00                       | 0.02 ± 0.01                                | 0.02 ± 0.01                                 | 0.02 ± 0.01                                  | 0.02 ± 0.01                                  |
| CH <sub>3</sub> CO <sub>2</sub> <sup>-</sup> |      | -143225.98 ± 0.03                      | 0.24 ± 0.23                                | 0.19 ± 0.19                                 | -0.26 ± 0.19                                 | 0.18 ± 0.30                                  |
|                                              | b    | -143225.39 ± 0.02                      | 0.17 ± 0.18                                | 0.19 ± 0.13                                 | 0.23 ± 0.19                                  | 0.14 ± 0.22                                  |
|                                              | ba   | -143274.83 ± 0.02                      | 0.29 ± 0.13                                | 0.29 ± 0.11                                 | 0.15 ± 0.16                                  | 0.24 ± 0.18                                  |
|                                              | bad  | -143279.87 ± 0.02                      | -0.05 ± 0.13                               | 0.04 ± 0.10                                 | 0.02 ± 0.15                                  | -0.03 ± 0.17                                 |
|                                              | badq | -143295.75 ± 0.02                      | 0.25 ± 0.09                                | 0.26 ± 0.09                                 | 0.29 ± 0.14                                  | 0.21 ± 0.13                                  |
| H <sub>3</sub> O <sup>+</sup>                |      | -48069.23 ± 0.01                       | 0.30 ± 0.14                                | 0.23 ± 0.20                                 | 0.22 ± 0.31                                  | 0.19 ± 0.29                                  |
|                                              | b    | -48069.30 ± 0.01                       | 0.02 ± 0.09                                | -0.04 ± 0.12                                | -0.32 ± 0.18                                 | 0.15 ± 0.16                                  |
|                                              | ba   | -48069.33 ± 0.00                       | 0.05 ± 0.03                                | 0.05 ± 0.03                                 | 0.03 ± 0.04                                  | 0.07 ± 0.04                                  |

*Continued on next page*

Table 32 – *Continued from previous page*

| Molec.                            | MM'  | $\Delta G_{\text{TI3}}^{N_i=11}$ | $\Delta\Delta G_{\text{TI}}^{N_i=3}$ | $\Delta\Delta G_{\text{BAR}}^{N_i=3}$ | $\Delta\Delta G_{\text{IEXP}}^{N_i=2}$ | $\Delta\Delta G_{\text{DEXP}}^{N_i=2}$ |
|-----------------------------------|------|----------------------------------|--------------------------------------|---------------------------------------|----------------------------------------|----------------------------------------|
|                                   | bad  | -48069.33 ± 0.00                 | 0.05 ± 0.03                          | 0.05 ± 0.03                           | 0.03 ± 0.04                            | 0.07 ± 0.04                            |
|                                   | badq | -48069.38 ± 0.00                 | 0.03 ± 0.04                          | 0.03 ± 0.03                           | 0.03 ± 0.04                            | 0.03 ± 0.04                            |
| C <sub>6</sub> H <sub>5</sub> Cl  |      | -433852.25 ± 0.02                | 0.07 ± 0.11                          | 0.04 ± 0.09                           | 0.13 ± 0.13                            | -0.09 ± 0.13                           |
|                                   | b    | -433850.13 ± 0.01                | 0.04 ± 0.08                          | 0.03 ± 0.06                           | 0.02 ± 0.10                            | 0.09 ± 0.11                            |
|                                   | ba   | -433853.89 ± 0.01                | 0.00 ± 0.05                          | 0.03 ± 0.05                           | -0.08 ± 0.07                           | 0.13 ± 0.06                            |
|                                   | bad  | -433855.52 ± 0.01                | -0.02 ± 0.06                         | 0.00 ± 0.05                           | -0.12 ± 0.06                           | 0.07 ± 0.08                            |
|                                   | badq | -433858.60 ± 0.01                | -0.16 ± 0.06                         | -0.15 ± 0.05                          | -0.15 ± 0.09                           | -0.15 ± 0.06                           |
| C <sub>6</sub> H <sub>14</sub>    |      | -148579.56 ± 0.01                | 0.03 ± 0.07                          | 0.01 ± 0.07                           | -0.23 ± 0.11                           | 0.33 ± 0.10                            |
|                                   | b    | -148580.35 ± 0.01                | -0.06 ± 0.06                         | -0.08 ± 0.04                          | -0.26 ± 0.06                           | 0.13 ± 0.05                            |
|                                   | ba   | -148579.69 ± 0.01                | 0.03 ± 0.05                          | 0.02 ± 0.05                           | -0.15 ± 0.07                           | 0.16 ± 0.07                            |
|                                   | bad  | -148579.55 ± 0.01                | 0.00 ± 0.05                          | -0.01 ± 0.05                          | -0.18 ± 0.06                           | 0.15 ± 0.06                            |
|                                   | badq | -148577.13 ± 0.01                | 0.07 ± 0.06                          | 0.05 ± 0.05                           | -0.11 ± 0.07                           | 0.25 ± 0.05                            |
| CH <sub>3</sub> OH                |      | -72528.21 ± 0.01                 | 0.00 ± 0.05                          | 0.01 ± 0.04                           | -0.22 ± 0.04                           | 0.18 ± 0.06                            |
|                                   | b    | -72528.26 ± 0.01                 | 0.02 ± 0.04                          | 0.03 ± 0.04                           | -0.19 ± 0.03                           | 0.20 ± 0.05                            |
|                                   | ba   | -72528.29 ± 0.01                 | 0.05 ± 0.04                          | 0.06 ± 0.03                           | -0.17 ± 0.04                           | 0.25 ± 0.05                            |
|                                   | bad  | -72528.28 ± 0.01                 | 0.05 ± 0.04                          | 0.06 ± 0.03                           | -0.18 ± 0.03                           | 0.27 ± 0.05                            |
|                                   | badq | -72528.80 ± 0.01                 | 0.04 ± 0.04                          | 0.06 ± 0.03                           | -0.18 ± 0.03                           | 0.26 ± 0.05                            |
| C <sub>2</sub> H <sub>6</sub>     |      | -50024.21 ± 0.00                 | 0.03 ± 0.02                          | 0.03 ± 0.03                           | -0.03 ± 0.03                           | 0.06 ± 0.04                            |
|                                   | b    | -50024.36 ± 0.00                 | 0.02 ± 0.02                          | 0.02 ± 0.02                           | -0.01 ± 0.03                           | 0.05 ± 0.03                            |
|                                   | ba   | -50024.20 ± 0.00                 | 0.02 ± 0.01                          | 0.02 ± 0.01                           | 0.01 ± 0.01                            | 0.04 ± 0.01                            |
|                                   | bad  | -50024.28 ± 0.00                 | 0.04 ± 0.01                          | 0.04 ± 0.01                           | 0.02 ± 0.02                            | 0.06 ± 0.02                            |
|                                   | badq | -50024.44 ± 0.00                 | 0.03 ± 0.01                          | 0.04 ± 0.01                           | 0.01 ± 0.02                            | 0.06 ± 0.02                            |
| (CH <sub>2</sub> ) <sub>4</sub> O |      | -145699.56 ± 0.02                | -0.11 ± 0.07                         | -0.05 ± 0.09                          | -1.06 ± 0.10                           | 0.87 ± 0.14                            |
|                                   | b    | -145699.47 ± 0.02                | 0.18 ± 0.14                          | 0.17 ± 0.15                           | -0.72 ± 0.20                           | 0.98 ± 0.22                            |

*Continued on next page*



Table 32 – *Continued from previous page*

| Molec.                            | MM'  | $\Delta G_{\text{TI3}}^{N_i=11}$ | $\Delta\Delta G_{\text{TI}}^{N_i=3}$ | $\Delta\Delta G_{\text{BAR}}^{N_i=3}$ | $\Delta\Delta G_{\text{IEXP}}^{N_i=2}$ | $\Delta\Delta G_{\text{DEXP}}^{N_i=2}$ |
|-----------------------------------|------|----------------------------------|--------------------------------------|---------------------------------------|----------------------------------------|----------------------------------------|
|                                   | ba   | -145697.65 ± 0.01                | 0.15 ± 0.06                          | 0.16 ± 0.05                           | -0.15 ± 0.06                           | 0.45 ± 0.08                            |
|                                   | bad  | -145698.65 ± 0.01                | 0.03 ± 0.06                          | 0.06 ± 0.06                           | -0.30 ± 0.06                           | 0.38 ± 0.07                            |
|                                   | badq | -145689.76 ± 0.01                | -0.02 ± 0.05                         | -0.01 ± 0.05                          | -0.27 ± 0.06                           | 0.19 ± 0.07                            |
| $\text{C}(\text{NH}_2)_3^+$       |      | -128901.22 ± 0.03                | 0.77 ± 0.24                          | 0.25 ± 0.27                           | -0.37 ± 0.18                           | 0.37 ± 0.35                            |
|                                   | b    | -128902.74 ± 0.03                | 0.77 ± 0.19                          | 0.43 ± 0.21                           | -0.36 ± 0.26                           | 0.90 ± 0.26                            |
|                                   | ba   | -128929.38 ± 0.03                | 0.97 ± 0.19                          | 0.70 ± 0.16                           | 0.96 ± 0.40                            | 0.69 ± 0.21                            |
|                                   | bad  | -128932.44 ± 0.02                | 0.60 ± 0.12                          | 0.52 ± 0.10                           | 0.18 ± 0.10                            | 0.40 ± 0.24                            |
|                                   | badq | -128914.70 ± 0.02                | 0.12 ± 0.10                          | 0.12 ± 0.10                           | -0.21 ± 0.09                           | 0.23 ± 0.14                            |
| $\text{C}_6\text{H}_5\text{NH}_2$ |      | -180227.49 ± 0.01                | -0.09 ± 0.07                         | -0.12 ± 0.08                          | -0.80 ± 0.09                           | 0.54 ± 0.09                            |
|                                   | b    | -180227.72 ± 0.01                | -0.09 ± 0.06                         | -0.09 ± 0.08                          | -0.67 ± 0.10                           | 0.47 ± 0.09                            |
|                                   | ba   | -180232.65 ± 0.01                | 0.04 ± 0.03                          | 0.06 ± 0.03                           | -0.22 ± 0.03                           | 0.33 ± 0.04                            |
|                                   | bad  | -180231.64 ± 0.01                | 0.00 ± 0.03                          | 0.01 ± 0.03                           | -0.23 ± 0.03                           | 0.22 ± 0.05                            |
|                                   | badq | -180261.12 ± 0.01                | 0.09 ± 0.08                          | 0.12 ± 0.06                           | -0.21 ± 0.07                           | 0.38 ± 0.08                            |
| $\text{CH}_3\text{CONH}_2$        |      | -131075.55 ± 0.01                | -0.09 ± 0.04                         | -0.10 ± 0.04                          | -0.55 ± 0.05                           | 0.38 ± 0.04                            |
|                                   | b    | -131075.53 ± 0.01                | -0.10 ± 0.05                         | -0.12 ± 0.06                          | -0.74 ± 0.07                           | 0.44 ± 0.08                            |
|                                   | ba   | -131080.95 ± 0.01                | -0.05 ± 0.03                         | -0.07 ± 0.04                          | -0.42 ± 0.04                           | 0.29 ± 0.04                            |
|                                   | bad  | -131081.99 ± 0.01                | -0.05 ± 0.03                         | -0.06 ± 0.03                          | -0.42 ± 0.04                           | 0.29 ± 0.04                            |
|                                   | badq | -131071.90 ± 0.01                | -0.07 ± 0.03                         | -0.10 ± 0.04                          | -0.44 ± 0.04                           | 0.21 ± 0.05                            |
| $\text{H}_2\text{O}$              |      | -47893.37 ± 0.00                 | 0.01 ± 0.01                          | 0.02 ± 0.01                           | -0.07 ± 0.01                           | 0.10 ± 0.01                            |
|                                   | b    | -47893.41 ± 0.00                 | 0.02 ± 0.01                          | 0.02 ± 0.01                           | -0.05 ± 0.01                           | 0.09 ± 0.01                            |
|                                   | ba   | -47893.40 ± 0.00                 | 0.01 ± 0.02                          | 0.01 ± 0.02                           | -0.13 ± 0.03                           | 0.14 ± 0.03                            |
|                                   | bad  | -47893.40 ± 0.00                 | 0.01 ± 0.02                          | 0.01 ± 0.02                           | -0.13 ± 0.03                           | 0.14 ± 0.03                            |
|                                   | badq | -47893.40 ± 0.00                 | 0.01 ± 0.02                          | 0.01 ± 0.02                           | -0.13 ± 0.03                           | 0.14 ± 0.03                            |
| $\text{C}_2\text{H}_5\text{OH}$   |      | -97162.98 ± 0.01                 | 0.02 ± 0.05                          | 0.03 ± 0.04                           | -0.17 ± 0.04                           | 0.20 ± 0.05                            |

*Continued on next page*

Table 32 – *Continued from previous page*

| Molec.                           | MM'  | $\Delta G_{\text{TI3}}^{N_i=11}$ | $\Delta\Delta G_{\text{TI}}^{N_i=3}$ | $\Delta\Delta G_{\text{BAR}}^{N_i=3}$ | $\Delta\Delta G_{\text{IEXP}}^{N_i=2}$ | $\Delta\Delta G_{\text{DEXP}}^{N_i=2}$ |
|----------------------------------|------|----------------------------------|--------------------------------------|---------------------------------------|----------------------------------------|----------------------------------------|
|                                  | b    | -97163.06 ± 0.00                 | 0.03 ± 0.03                          | 0.04 ± 0.03                           | -0.09 ± 0.03                           | 0.15 ± 0.04                            |
|                                  | ba   | -97163.47 ± 0.01                 | -0.03 ± 0.07                         | -0.02 ± 0.06                          | -0.39 ± 0.06                           | 0.20 ± 0.09                            |
|                                  | bad  | -97163.66 ± 0.01                 | 0.04 ± 0.06                          | 0.04 ± 0.05                           | -0.39 ± 0.05                           | 0.36 ± 0.08                            |
|                                  | badq | -97163.34 ± 0.01                 | -0.01 ± 0.07                         | -0.01 ± 0.06                          | -0.32 ± 0.06                           | 0.19 ± 0.08                            |
| C <sub>6</sub> H <sub>6</sub>    |      | -145560.00 ± 0.01                | -0.02 ± 0.03                         | -0.01 ± 0.02                          | -0.25 ± 0.03                           | 0.23 ± 0.03                            |
|                                  | b    | -145560.43 ± 0.00                | 0.00 ± 0.02                          | 0.00 ± 0.01                           | -0.09 ± 0.02                           | 0.09 ± 0.02                            |
|                                  | ba   | -145565.77 ± 0.00                | -0.03 ± 0.02                         | -0.03 ± 0.01                          | -0.14 ± 0.02                           | 0.08 ± 0.02                            |
|                                  | bad  | -145564.02 ± 0.00                | 0.47 ± 0.02                          | 0.36 ± 0.01                           | 0.29 ± 0.02                            | 0.42 ± 0.02                            |
|                                  | badq | -145563.39 ± 0.00                | 0.30 ± 0.03                          | 0.23 ± 0.02                           | 0.19 ± 0.03                            | 0.26 ± 0.03                            |
| C <sub>6</sub> H <sub>5</sub> OH |      | -192693.96 ± 0.01                | -0.02 ± 0.04                         | -0.02 ± 0.04                          | -0.39 ± 0.04                           | 0.34 ± 0.05                            |
|                                  | b    | -192694.26 ± 0.01                | -0.02 ± 0.03                         | -0.01 ± 0.03                          | -0.23 ± 0.04                           | 0.21 ± 0.04                            |
|                                  | ba   | -192699.45 ± 0.00                | 0.01 ± 0.02                          | 0.02 ± 0.02                           | -0.16 ± 0.02                           | 0.19 ± 0.03                            |
|                                  | bad  | -192698.00 ± 0.01                | 0.02 ± 0.02                          | 0.03 ± 0.02                           | -0.14 ± 0.03                           | 0.19 ± 0.03                            |
|                                  | badq | -192712.32 ± 0.00                | 0.05 ± 0.02                          | 0.06 ± 0.02                           | -0.18 ± 0.03                           | 0.30 ± 0.03                            |

Table 33: MM-to-QM gas-phase solvation free energy correction values from 6- $\lambda$  states simulated for 50 ps

| Molec.                                       | MM'  | $\Delta G_{\text{TI3}}^{N_\lambda=11}$ | $\Delta\Delta G_{\text{TI}}^{N_\lambda=6}$ | $\Delta\Delta G_{\text{BAR}}^{N_\lambda=6}$ | $\Delta\Delta G_{\text{IEXP}}^{N_\lambda=5}$ | $\Delta\Delta G_{\text{DEXP}}^{N_\lambda=5}$ |
|----------------------------------------------|------|----------------------------------------|--------------------------------------------|---------------------------------------------|----------------------------------------------|----------------------------------------------|
| CO <sub>3</sub> <sup>2-</sup>                |      | -165234.08 ± 0.05                      | 0.42 ± 0.30                                | 0.43 ± 0.30                                 | -0.78 ± 0.34                                 | 1.49 ± 0.47                                  |
|                                              | b    | -165233.97 ± 0.00                      | 0.26 ± 0.03                                | 0.26 ± 0.03                                 | 0.21 ± 0.04                                  | 0.31 ± 0.04                                  |
|                                              | ba   | -165298.74 ± 0.00                      | 0.05 ± 0.02                                | 0.04 ± 0.02                                 | 0.08 ± 0.02                                  | 0.01 ± 0.03                                  |
|                                              | bad  | -165350.72 ± 0.00                      | 0.07 ± 0.02                                | 0.07 ± 0.02                                 | 0.06 ± 0.03                                  | 0.07 ± 0.03                                  |
|                                              | badq | -165337.39 ± 0.00                      | 0.07 ± 0.02                                | 0.07 ± 0.02                                 | 0.06 ± 0.03                                  | 0.07 ± 0.03                                  |
| CH <sub>3</sub> NH <sub>3</sub> <sup>+</sup> |      | -60350.21 ± 0.02                       | -0.01 ± 0.07                               | -0.01 ± 0.06                                | -0.03 ± 0.09                                 | 0.01 ± 0.08                                  |
|                                              | b    | -60350.95 ± 0.01                       | 0.03 ± 0.05                                | 0.03 ± 0.04                                 | 0.03 ± 0.05                                  | 0.03 ± 0.08                                  |
|                                              | ba   | -60353.33 ± 0.01                       | 0.10 ± 0.03                                | 0.10 ± 0.03                                 | 0.08 ± 0.04                                  | 0.13 ± 0.04                                  |
|                                              | bad  | -60353.51 ± 0.01                       | 0.00 ± 0.02                                | 0.00 ± 0.02                                 | -0.02 ± 0.03                                 | 0.02 ± 0.03                                  |
|                                              | badq | -60350.03 ± 0.01                       | -0.07 ± 0.03                               | -0.07 ± 0.02                                | -0.08 ± 0.03                                 | -0.07 ± 0.03                                 |
| NH <sub>4</sub> <sup>+</sup>                 |      | -35656.21 ± 0.00                       | 0.08 ± 0.01                                | 0.08 ± 0.01                                 | 0.08 ± 0.01                                  | 0.09 ± 0.01                                  |
|                                              | b    | -35656.29 ± 0.00                       | 0.04 ± 0.01                                | 0.04 ± 0.01                                 | 0.03 ± 0.01                                  | 0.04 ± 0.02                                  |
|                                              | ba   | -35657.44 ± 0.00                       | -0.01 ± 0.01                               | -0.01 ± 0.01                                | -0.01 ± 0.01                                 | -0.01 ± 0.01                                 |
|                                              | bad  | -35657.44 ± 0.00                       | -0.01 ± 0.01                               | -0.01 ± 0.01                                | -0.01 ± 0.01                                 | -0.01 ± 0.01                                 |
|                                              | badq | -35656.32 ± 0.00                       | 0.00 ± 0.01                                | 0.00 ± 0.01                                 | 0.00 ± 0.01                                  | 0.00 ± 0.01                                  |
| CH <sub>3</sub> CO <sub>2</sub> <sup>-</sup> |      | -143225.98 ± 0.03                      | 0.11 ± 0.15                                | 0.12 ± 0.12                                 | 0.10 ± 0.17                                  | 0.11 ± 0.16                                  |
|                                              | b    | -143225.39 ± 0.02                      | -0.04 ± 0.08                               | -0.04 ± 0.06                                | -0.18 ± 0.09                                 | 0.11 ± 0.09                                  |
|                                              | ba   | -143274.83 ± 0.02                      | 0.23 ± 0.07                                | 0.23 ± 0.05                                 | 0.14 ± 0.07                                  | 0.29 ± 0.07                                  |
|                                              | bad  | -143279.87 ± 0.02                      | 0.14 ± 0.08                                | 0.15 ± 0.05                                 | 0.15 ± 0.08                                  | 0.16 ± 0.08                                  |
|                                              | badq | -143295.75 ± 0.02                      | 0.05 ± 0.07                                | 0.07 ± 0.06                                 | 0.11 ± 0.08                                  | 0.02 ± 0.08                                  |
| H <sub>3</sub> O <sup>+</sup>                |      | -48069.23 ± 0.01                       | -0.10 ± 0.09                               | -0.10 ± 0.07                                | -0.09 ± 0.12                                 | -0.11 ± 0.11                                 |
|                                              | b    | -48069.30 ± 0.01                       | -0.12 ± 0.08                               | -0.13 ± 0.06                                | -0.16 ± 0.08                                 | -0.12 ± 0.08                                 |
|                                              | ba   | -48069.33 ± 0.00                       | -0.01 ± 0.02                               | -0.01 ± 0.02                                | -0.02 ± 0.04                                 | 0.00 ± 0.04                                  |

*Continued on next page*

Table 33 – *Continued from previous page*

| Molec.                           | MM'                               | $\Delta G_{\text{TI3}}^{N_i=11}$ | $\Delta\Delta G_{\text{TI}}^{N_i=6}$ | $\Delta\Delta G_{\text{BAR}}^{N_i=6}$ | $\Delta\Delta G_{\text{IEXP}}^{N_i=5}$ | $\Delta\Delta G_{\text{DEXP}}^{N_i=5}$ |
|----------------------------------|-----------------------------------|----------------------------------|--------------------------------------|---------------------------------------|----------------------------------------|----------------------------------------|
| C <sub>6</sub> H <sub>5</sub> Cl | bad                               | -48069.33 ± 0.00                 | -0.01 ± 0.02                         | -0.01 ± 0.02                          | -0.02 ± 0.04                           | 0.00 ± 0.04                            |
|                                  | badq                              | -48069.38 ± 0.00                 | 0.05 ± 0.02                          | 0.04 ± 0.02                           | 0.04 ± 0.03                            | 0.04 ± 0.04                            |
|                                  |                                   | -433852.25 ± 0.02                | -0.23 ± 0.07                         | -0.22 ± 0.06                          | -0.20 ± 0.08                           | -0.24 ± 0.08                           |
|                                  | b                                 | -433850.13 ± 0.01                | -0.08 ± 0.05                         | -0.07 ± 0.04                          | -0.10 ± 0.06                           | -0.04 ± 0.07                           |
|                                  | ba                                | -433853.89 ± 0.01                | 0.08 ± 0.04                          | 0.08 ± 0.03                           | 0.05 ± 0.04                            | 0.11 ± 0.04                            |
|                                  | bad                               | -433855.52 ± 0.01                | -0.04 ± 0.03                         | -0.03 ± 0.03                          | -0.09 ± 0.03                           | 0.01 ± 0.04                            |
| C <sub>6</sub> H <sub>14</sub>   | badq                              | -433858.60 ± 0.01                | -0.08 ± 0.03                         | -0.08 ± 0.03                          | -0.09 ± 0.04                           | -0.07 ± 0.03                           |
|                                  |                                   | -148579.56 ± 0.01                | -0.03 ± 0.04                         | -0.02 ± 0.03                          | -0.14 ± 0.04                           | 0.11 ± 0.04                            |
|                                  | b                                 | -148580.35 ± 0.01                | -0.04 ± 0.03                         | -0.04 ± 0.02                          | -0.13 ± 0.03                           | 0.05 ± 0.03                            |
|                                  | ba                                | -148579.69 ± 0.01                | -0.01 ± 0.04                         | -0.01 ± 0.03                          | -0.07 ± 0.04                           | 0.05 ± 0.04                            |
|                                  | bad                               | -148579.55 ± 0.01                | 0.01 ± 0.04                          | 0.01 ± 0.03                           | -0.05 ± 0.04                           | 0.07 ± 0.04                            |
|                                  | badq                              | -148577.13 ± 0.01                | -0.03 ± 0.03                         | -0.02 ± 0.02                          | -0.11 ± 0.04                           | 0.06 ± 0.03                            |
| CH <sub>3</sub> OH               |                                   | -72528.21 ± 0.01                 | 0.00 ± 0.03                          | 0.00 ± 0.02                           | -0.09 ± 0.03                           | 0.09 ± 0.03                            |
|                                  | b                                 | -72528.26 ± 0.01                 | 0.01 ± 0.03                          | 0.01 ± 0.02                           | -0.07 ± 0.03                           | 0.09 ± 0.03                            |
|                                  | ba                                | -72528.29 ± 0.01                 | 0.09 ± 0.03                          | 0.08 ± 0.02                           | -0.01 ± 0.06                           | 0.17 ± 0.06                            |
|                                  | bad                               | -72528.28 ± 0.01                 | -0.07 ± 0.02                         | -0.05 ± 0.02                          | -0.14 ± 0.02                           | 0.03 ± 0.03                            |
|                                  | badq                              | -72528.80 ± 0.01                 | 0.02 ± 0.02                          | 0.03 ± 0.02                           | -0.07 ± 0.02                           | 0.12 ± 0.03                            |
|                                  |                                   | -50024.21 ± 0.00                 | 0.02 ± 0.02                          | 0.02 ± 0.02                           | 0.00 ± 0.02                            | 0.03 ± 0.02                            |
| C <sub>2</sub> H <sub>6</sub>    | b                                 | -50024.36 ± 0.00                 | 0.03 ± 0.02                          | 0.03 ± 0.02                           | 0.02 ± 0.03                            | 0.04 ± 0.03                            |
|                                  | ba                                | -50024.20 ± 0.00                 | 0.04 ± 0.01                          | 0.04 ± 0.01                           | 0.03 ± 0.01                            | 0.04 ± 0.01                            |
|                                  | bad                               | -50024.28 ± 0.00                 | 0.05 ± 0.01                          | 0.05 ± 0.01                           | 0.04 ± 0.01                            | 0.06 ± 0.01                            |
|                                  | badq                              | -50024.44 ± 0.00                 | 0.04 ± 0.01                          | 0.04 ± 0.01                           | 0.03 ± 0.01                            | 0.05 ± 0.01                            |
|                                  |                                   | -145699.56 ± 0.02                | 0.10 ± 0.07                          | 0.10 ± 0.05                           | -0.25 ± 0.08                           | 0.44 ± 0.08                            |
|                                  | (CH <sub>2</sub> ) <sub>4</sub> O | b                                | -145699.47 ± 0.02                    | 0.16 ± 0.08                           | 0.19 ± 0.07                            | -0.23 ± 0.09                           |

*Continued on next page*

Table 33 – *Continued from previous page*

| Molec.                                        | MM'                               | $\Delta G_{\text{TI3}}^{N_i=11}$ | $\Delta\Delta G_{\text{TI}}^{N_i=6}$ | $\Delta\Delta G_{\text{BAR}}^{N_i=6}$ | $\Delta\Delta G_{\text{IEXP}}^{N_i=5}$ | $\Delta\Delta G_{\text{DEXP}}^{N_i=5}$ |
|-----------------------------------------------|-----------------------------------|----------------------------------|--------------------------------------|---------------------------------------|----------------------------------------|----------------------------------------|
| C(NH <sub>2</sub> ) <sub>3</sub> <sup>+</sup> | ba                                | -145697.65 ± 0.01                | 0.14 ± 0.04                          | 0.15 ± 0.03                           | 0.03 ± 0.04                            | 0.26 ± 0.05                            |
|                                               | bad                               | -145698.65 ± 0.01                | 0.15 ± 0.04                          | 0.15 ± 0.03                           | 0.01 ± 0.04                            | 0.29 ± 0.04                            |
|                                               | badq                              | -145689.76 ± 0.01                | 0.00 ± 0.04                          | 0.00 ± 0.04                           | -0.10 ± 0.05                           | 0.08 ± 0.05                            |
|                                               | b                                 | -128901.22 ± 0.03                | 0.14 ± 0.13                          | 0.07 ± 0.15                           | -0.27 ± 0.16                           | 0.17 ± 0.25                            |
|                                               | b                                 | -128902.74 ± 0.03                | 0.07 ± 0.11                          | 0.06 ± 0.12                           | -0.32 ± 0.15                           | 0.31 ± 0.16                            |
|                                               | ba                                | -128929.38 ± 0.03                | 0.29 ± 0.10                          | 0.28 ± 0.12                           | 0.14 ± 0.19                            | 0.35 ± 0.14                            |
|                                               | bad                               | -128932.44 ± 0.02                | 0.18 ± 0.06                          | 0.19 ± 0.07                           | 0.03 ± 0.07                            | 0.26 ± 0.10                            |
| C <sub>6</sub> H <sub>5</sub> NH <sub>2</sub> | badq                              | -128914.70 ± 0.02                | 0.12 ± 0.07                          | 0.10 ± 0.06                           | 0.01 ± 0.08                            | 0.16 ± 0.08                            |
|                                               | b                                 | -180227.49 ± 0.01                | 0.02 ± 0.04                          | 0.01 ± 0.04                           | -0.28 ± 0.05                           | 0.29 ± 0.05                            |
|                                               | b                                 | -180227.72 ± 0.01                | 0.00 ± 0.04                          | 0.00 ± 0.04                           | -0.23 ± 0.06                           | 0.23 ± 0.06                            |
|                                               | ba                                | -180232.65 ± 0.01                | 0.04 ± 0.02                          | 0.04 ± 0.02                           | -0.07 ± 0.02                           | 0.15 ± 0.02                            |
|                                               | bad                               | -180231.64 ± 0.01                | -0.02 ± 0.02                         | -0.02 ± 0.02                          | -0.11 ± 0.03                           | 0.06 ± 0.03                            |
|                                               | badq                              | -180261.12 ± 0.01                | 0.03 ± 0.03                          | 0.03 ± 0.03                           | -0.12 ± 0.04                           | 0.18 ± 0.04                            |
|                                               | CH <sub>3</sub> CONH <sub>2</sub> | b                                | -131075.55 ± 0.01                    | -0.09 ± 0.03                          | -0.09 ± 0.03                           | -0.28 ± 0.04                           |
| b                                             | -131075.53 ± 0.01                 | -0.12 ± 0.04                     | -0.12 ± 0.03                         | -0.37 ± 0.04                          | 0.12 ± 0.04                            |                                        |
| H <sub>2</sub> O                              | ba                                | -131080.95 ± 0.01                | -0.12 ± 0.02                         | -0.12 ± 0.02                          | -0.26 ± 0.03                           | 0.02 ± 0.03                            |
|                                               | bad                               | -131081.99 ± 0.01                | -0.08 ± 0.02                         | -0.08 ± 0.02                          | -0.22 ± 0.03                           | 0.06 ± 0.03                            |
|                                               | badq                              | -131071.90 ± 0.01                | -0.09 ± 0.02                         | -0.10 ± 0.02                          | -0.24 ± 0.02                           | 0.04 ± 0.03                            |
|                                               | ba                                | -47893.37 ± 0.00                 | 0.00 ± 0.01                          | 0.00 ± 0.01                           | -0.03 ± 0.01                           | 0.04 ± 0.01                            |
|                                               | b                                 | -47893.41 ± 0.00                 | 0.01 ± 0.01                          | 0.01 ± 0.01                           | -0.02 ± 0.01                           | 0.04 ± 0.01                            |
| C <sub>2</sub> H <sub>5</sub> OH              | ba                                | -47893.40 ± 0.00                 | 0.01 ± 0.01                          | 0.01 ± 0.01                           | -0.05 ± 0.01                           | 0.06 ± 0.01                            |
|                                               | bad                               | -47893.40 ± 0.00                 | 0.01 ± 0.01                          | 0.01 ± 0.01                           | -0.05 ± 0.01                           | 0.06 ± 0.01                            |
|                                               | badq                              | -47893.40 ± 0.00                 | 0.01 ± 0.01                          | 0.01 ± 0.01                           | -0.05 ± 0.01                           | 0.06 ± 0.01                            |
| C <sub>2</sub> H <sub>5</sub> OH              |                                   | -97162.98 ± 0.01                 | 0.02 ± 0.03                          | 0.03 ± 0.02                           | -0.06 ± 0.02                           | 0.10 ± 0.03                            |

*Continued on next page*

Table 33 – *Continued from previous page*

| Molec.                           | MM'  | $\Delta G_{\text{TI3}}^{N_i=11}$ | $\Delta\Delta G_{\text{TI}}^{N_i=6}$ | $\Delta\Delta G_{\text{BAR}}^{N_i=6}$ | $\Delta\Delta G_{\text{IEXP}}^{N_i=5}$ | $\Delta\Delta G_{\text{DEXP}}^{N_i=5}$ |
|----------------------------------|------|----------------------------------|--------------------------------------|---------------------------------------|----------------------------------------|----------------------------------------|
|                                  | b    | -97163.06 ± 0.00                 | 0.01 ± 0.02                          | 0.02 ± 0.02                           | -0.03 ± 0.02                           | 0.06 ± 0.02                            |
|                                  | ba   | -97163.47 ± 0.01                 | 0.01 ± 0.05                          | 0.02 ± 0.04                           | -0.12 ± 0.04                           | 0.12 ± 0.05                            |
|                                  | bad  | -97163.66 ± 0.01                 | 0.01 ± 0.05                          | 0.01 ± 0.04                           | -0.12 ± 0.05                           | 0.12 ± 0.05                            |
|                                  | badq | -97163.34 ± 0.01                 | -0.01 ± 0.04                         | -0.01 ± 0.03                          | -0.14 ± 0.04                           | 0.09 ± 0.05                            |
| C <sub>6</sub> H <sub>6</sub>    |      | -145560.00 ± 0.01                | -0.08 ± 0.02                         | -0.08 ± 0.02                          | -0.17 ± 0.02                           | 0.02 ± 0.02                            |
|                                  | b    | -145560.43 ± 0.00                | -0.02 ± 0.01                         | -0.02 ± 0.01                          | -0.06 ± 0.01                           | 0.01 ± 0.01                            |
|                                  | ba   | -145565.77 ± 0.00                | 0.01 ± 0.01                          | 0.01 ± 0.01                           | -0.03 ± 0.02                           | 0.06 ± 0.02                            |
|                                  | bad  | -145564.02 ± 0.00                | -0.02 ± 0.01                         | -0.02 ± 0.01                          | -0.05 ± 0.02                           | 0.00 ± 0.02                            |
|                                  | badq | -145563.39 ± 0.00                | 0.00 ± 0.01                          | 0.00 ± 0.01                           | -0.02 ± 0.01                           | 0.02 ± 0.01                            |
| C <sub>6</sub> H <sub>5</sub> OH |      | -192693.96 ± 0.01                | 0.00 ± 0.02                          | 0.00 ± 0.02                           | -0.15 ± 0.03                           | 0.15 ± 0.03                            |
|                                  | b    | -192694.26 ± 0.01                | 0.02 ± 0.02                          | 0.02 ± 0.02                           | -0.08 ± 0.02                           | 0.11 ± 0.02                            |
|                                  | ba   | -192699.45 ± 0.00                | 0.02 ± 0.01                          | 0.02 ± 0.01                           | -0.05 ± 0.02                           | 0.09 ± 0.02                            |
|                                  | bad  | -192698.00 ± 0.01                | 0.00 ± 0.02                          | 0.00 ± 0.02                           | -0.06 ± 0.03                           | 0.06 ± 0.03                            |
|                                  | badq | -192712.32 ± 0.00                | -0.01 ± 0.01                         | -0.01 ± 0.01                          | -0.10 ± 0.02                           | 0.09 ± 0.02                            |

Table 34: MM-to-QM gas-phase solvation free energy correction values from 2- $\lambda$  states simulated for 20 ps

| Molec.                                       | MM'  | $\Delta G_{\text{TI3}}^{N_\lambda=11}$ | $\Delta\Delta G_{\text{TI}}^{N_\lambda=2}$ | $\Delta\Delta G_{\text{BAR}}^{N_\lambda=2}$ | $\Delta\Delta G_{\text{IEXP}}^{N_\lambda=1}$ | $\Delta\Delta G_{\text{DEXP}}^{N_\lambda=1}$ |
|----------------------------------------------|------|----------------------------------------|--------------------------------------------|---------------------------------------------|----------------------------------------------|----------------------------------------------|
| CO <sub>3</sub> <sup>2-</sup>                |      | -165234.08 ± 0.05                      | 2.55 ± 1.45                                | 3.06 ± 0.60                                 | -9.21 ± 0.47                                 | 15.33 ± 0.37                                 |
|                                              | b    | -165233.97 ± 0.00                      | 0.46 ± 0.17                                | 0.40 ± 0.18                                 | 0.37 ± 0.17                                  | 0.23 ± 0.21                                  |
|                                              | ba   | -165298.74 ± 0.00                      | 0.78 ± 0.07                                | 0.80 ± 0.12                                 | 0.14 ± 0.12                                  | 1.51 ± 0.08                                  |
|                                              | bad  | -165350.72 ± 0.00                      | 0.17 ± 0.13                                | 0.13 ± 0.11                                 | 0.10 ± 0.13                                  | 0.06 ± 0.14                                  |
|                                              | badq | -165337.39 ± 0.00                      | 0.18 ± 0.11                                | 0.15 ± 0.09                                 | 0.11 ± 0.09                                  | 0.09 ± 0.12                                  |
| CH <sub>3</sub> NH <sub>3</sub> <sup>+</sup> |      | -60350.21 ± 0.02                       | 0.14 ± 0.21                                | 0.14 ± 0.24                                 | 0.05 ± 0.29                                  | 0.29 ± 0.31                                  |
|                                              | b    | -60350.95 ± 0.01                       | 0.08 ± 0.11                                | 0.10 ± 0.18                                 | -0.45 ± 0.17                                 | 0.69 ± 0.16                                  |
|                                              | ba   | -60353.33 ± 0.01                       | 0.13 ± 0.09                                | 0.14 ± 0.10                                 | -0.03 ± 0.16                                 | 0.37 ± 0.11                                  |
|                                              | bad  | -60353.51 ± 0.01                       | 0.03 ± 0.09                                | 0.04 ± 0.08                                 | 0.05 ± 0.09                                  | 0.02 ± 0.11                                  |
|                                              | badq | -60350.03 ± 0.01                       | 0.04 ± 0.09                                | 0.05 ± 0.09                                 | 0.09 ± 0.13                                  | 0.05 ± 0.15                                  |
| NH <sub>4</sub> <sup>+</sup>                 |      | -35656.21 ± 0.00                       | 0.06 ± 0.03                                | 0.06 ± 0.03                                 | 0.05 ± 0.04                                  | 0.07 ± 0.05                                  |
|                                              | b    | -35656.29 ± 0.00                       | 0.01 ± 0.03                                | 0.01 ± 0.03                                 | 0.00 ± 0.04                                  | 0.01 ± 0.04                                  |
|                                              | ba   | -35657.44 ± 0.00                       | -0.03 ± 0.03                               | -0.03 ± 0.03                                | 0.03 ± 0.05                                  | -0.09 ± 0.04                                 |
|                                              | bad  | -35657.44 ± 0.00                       | -0.03 ± 0.03                               | -0.03 ± 0.03                                | 0.03 ± 0.05                                  | -0.09 ± 0.04                                 |
|                                              | badq | -35656.32 ± 0.00                       | 0.01 ± 0.03                                | 0.01 ± 0.03                                 | -0.03 ± 0.03                                 | 0.05 ± 0.04                                  |
| CH <sub>3</sub> CO <sub>2</sub> <sup>-</sup> |      | -143225.98 ± 0.03                      | 0.63 ± 0.70                                | -0.88 ± 0.42                                | -1.60 ± 0.33                                 | -0.88 ± 0.50                                 |
|                                              | b    | -143225.39 ± 0.02                      | 0.19 ± 0.35                                | -0.44 ± 0.34                                | -1.93 ± 0.17                                 | 0.94 ± 0.32                                  |
|                                              | ba   | -143274.83 ± 0.02                      | -0.19 ± 0.29                               | -0.10 ± 0.33                                | -0.03 ± 0.40                                 | 0.35 ± 0.27                                  |
|                                              | bad  | -143279.87 ± 0.02                      | -0.26 ± 0.42                               | 0.02 ± 0.28                                 | 0.06 ± 0.30                                  | -0.48 ± 0.33                                 |
|                                              | badq | -143295.75 ± 0.02                      | 0.14 ± 0.22                                | 0.16 ± 0.21                                 | -0.11 ± 0.18                                 | 0.20 ± 0.27                                  |
| H <sub>3</sub> O <sup>+</sup>                |      | -48069.23 ± 0.01                       | 0.14 ± 0.38                                | -0.09 ± 0.32                                | -0.64 ± 0.29                                 | 0.36 ± 0.33                                  |
|                                              | b    | -48069.30 ± 0.01                       | -0.02 ± 0.30                               | -0.07 ± 0.38                                | -0.12 ± 0.48                                 | -0.22 ± 0.31                                 |
|                                              | ba   | -48069.33 ± 0.00                       | 0.17 ± 0.10                                | 0.19 ± 0.10                                 | 0.06 ± 0.11                                  | 0.28 ± 0.17                                  |

*Continued on next page*

Table 34 – *Continued from previous page*

| Molec.                            | MM'  | $\Delta G_{\text{TI3}}^{N_i=11}$ | $\Delta\Delta G_{\text{TI}}^{N_i=2}$ | $\Delta\Delta G_{\text{BAR}}^{N_i=2}$ | $\Delta\Delta G_{\text{IEXP}}^{N_i=1}$ | $\Delta\Delta G_{\text{DEXP}}^{N_i=1}$ |
|-----------------------------------|------|----------------------------------|--------------------------------------|---------------------------------------|----------------------------------------|----------------------------------------|
|                                   | bad  | -48069.33 ± 0.00                 | 0.17 ± 0.10                          | 0.19 ± 0.10                           | 0.06 ± 0.11                            | 0.28 ± 0.17                            |
|                                   | badq | -48069.38 ± 0.00                 | 0.29 ± 0.10                          | 0.29 ± 0.11                           | 0.17 ± 0.19                            | 0.44 ± 0.10                            |
| C <sub>6</sub> H <sub>5</sub> Cl  |      | -433852.25 ± 0.02                | -0.01 ± 0.28                         | -0.21 ± 0.21                          | 0.04 ± 0.40                            | -0.87 ± 0.43                           |
|                                   | b    | -433850.13 ± 0.01                | -0.08 ± 0.16                         | -0.04 ± 0.14                          | 0.11 ± 0.24                            | 0.06 ± 0.18                            |
|                                   | ba   | -433853.89 ± 0.01                | -0.04 ± 0.13                         | -0.07 ± 0.15                          | -0.31 ± 0.11                           | 0.03 ± 0.28                            |
|                                   | bad  | -433855.52 ± 0.01                | 0.17 ± 0.09                          | 0.17 ± 0.10                           | -0.04 ± 0.16                           | 0.41 ± 0.11                            |
|                                   | badq | -433858.60 ± 0.01                | 0.17 ± 0.10                          | 0.15 ± 0.11                           | -0.03 ± 0.11                           | 0.20 ± 0.15                            |
| C <sub>6</sub> H <sub>14</sub>    |      | -148579.56 ± 0.01                | -0.29 ± 0.13                         | -0.21 ± 0.17                          | -0.72 ± 0.19                           | 0.43 ± 0.11                            |
|                                   | b    | -148580.35 ± 0.01                | -0.10 ± 0.07                         | -0.10 ± 0.09                          | -0.52 ± 0.10                           | 0.29 ± 0.10                            |
|                                   | ba   | -148579.69 ± 0.01                | 0.02 ± 0.18                          | -0.05 ± 0.17                          | -0.13 ± 0.20                           | -0.17 ± 0.24                           |
|                                   | bad  | -148579.55 ± 0.01                | 0.08 ± 0.13                          | 0.07 ± 0.15                           | -0.10 ± 0.19                           | 0.32 ± 0.15                            |
|                                   | badq | -148577.13 ± 0.01                | -0.02 ± 0.10                         | 0.01 ± 0.12                           | -0.16 ± 0.19                           | 0.34 ± 0.09                            |
| CH <sub>3</sub> OH                |      | -72528.21 ± 0.01                 | 0.06 ± 0.13                          | -0.02 ± 0.14                          | -0.53 ± 0.10                           | 0.30 ± 0.22                            |
|                                   | b    | -72528.26 ± 0.01                 | 0.06 ± 0.11                          | 0.00 ± 0.14                           | -0.46 ± 0.09                           | 0.31 ± 0.16                            |
|                                   | ba   | -72528.29 ± 0.01                 | 0.10 ± 0.08                          | 0.06 ± 0.10                           | -0.45 ± 0.08                           | 0.52 ± 0.11                            |
|                                   | bad  | -72528.28 ± 0.01                 | 0.14 ± 0.10                          | 0.09 ± 0.11                           | -0.42 ± 0.08                           | 0.51 ± 0.15                            |
|                                   | badq | -72528.80 ± 0.01                 | 0.13 ± 0.09                          | 0.08 ± 0.12                           | -0.44 ± 0.07                           | 0.51 ± 0.14                            |
| C <sub>2</sub> H <sub>6</sub>     |      | -50024.21 ± 0.00                 | -0.06 ± 0.08                         | -0.05 ± 0.08                          | -0.11 ± 0.09                           | 0.04 ± 0.09                            |
|                                   | b    | -50024.36 ± 0.00                 | 0.08 ± 0.06                          | 0.07 ± 0.09                           | -0.11 ± 0.05                           | 0.22 ± 0.16                            |
|                                   | ba   | -50024.20 ± 0.00                 | 0.03 ± 0.02                          | 0.03 ± 0.02                           | -0.01 ± 0.04                           | 0.07 ± 0.03                            |
|                                   | bad  | -50024.28 ± 0.00                 | 0.05 ± 0.03                          | 0.05 ± 0.03                           | -0.01 ± 0.04                           | 0.12 ± 0.04                            |
|                                   | badq | -50024.44 ± 0.00                 | 0.05 ± 0.02                          | 0.05 ± 0.02                           | -0.01 ± 0.04                           | 0.12 ± 0.03                            |
| (CH <sub>2</sub> ) <sub>4</sub> O |      | -145699.56 ± 0.02                | 0.40 ± 0.24                          | 0.23 ± 0.30                           | -1.08 ± 0.21                           | 1.49 ± 0.25                            |
|                                   | b    | -145699.47 ± 0.02                | 0.84 ± 0.29                          | 0.51 ± 0.38                           | -1.52 ± 0.22                           | 2.50 ± 0.32                            |

*Continued on next page*



Table 34 – *Continued from previous page*

| Molec.                            | MM'  | $\Delta G_{\text{TI3}}^{N_{\lambda}=11}$ | $\Delta \Delta G_{\text{TI}}^{N_{\lambda}=2}$ | $\Delta \Delta G_{\text{BAR}}^{N_{\lambda}=2}$ | $\Delta \Delta G_{\text{IEXP}}^{N_{\lambda}=1}$ | $\Delta \Delta G_{\text{DEXP}}^{N_{\lambda}=1}$ |
|-----------------------------------|------|------------------------------------------|-----------------------------------------------|------------------------------------------------|-------------------------------------------------|-------------------------------------------------|
|                                   | ba   | -145697.65 ± 0.01                        | 0.15 ± 0.12                                   | 0.10 ± 0.14                                    | -0.37 ± 0.14                                    | 0.49 ± 0.19                                     |
|                                   | bad  | -145698.65 ± 0.01                        | 0.27 ± 0.14                                   | 0.17 ± 0.16                                    | -0.47 ± 0.12                                    | 0.63 ± 0.25                                     |
|                                   | badq | -145689.76 ± 0.01                        | 0.18 ± 0.11                                   | 0.14 ± 0.12                                    | -0.40 ± 0.10                                    | 0.61 ± 0.15                                     |
| $\text{C}(\text{NH}_2)_3^+$       |      | -128901.22 ± 0.03                        | 1.79 ± 0.48                                   | 0.85 ± 0.51                                    | -0.25 ± 0.24                                    | -0.51 ± 0.56                                    |
|                                   | b    | -128902.74 ± 0.03                        | 5.18 ± 1.03                                   | 1.48 ± 0.52                                    | -1.41 ± 0.30                                    | 4.36 ± 0.44                                     |
|                                   | ba   | -128929.38 ± 0.03                        | 0.67 ± 0.28                                   | 0.25 ± 0.25                                    | -0.58 ± 0.19                                    | 0.99 ± 0.24                                     |
|                                   | bad  | -128932.44 ± 0.02                        | 0.25 ± 0.28                                   | 0.00 ± 0.28                                    | -0.03 ± 0.30                                    | 0.07 ± 0.31                                     |
|                                   | badq | -128914.70 ± 0.02                        | 0.47 ± 0.25                                   | 0.28 ± 0.16                                    | -0.09 ± 0.13                                    | 0.56 ± 0.17                                     |
| $\text{C}_6\text{H}_5\text{NH}_2$ |      | -180227.49 ± 0.01                        | 0.15 ± 0.13                                   | 0.10 ± 0.20                                    | -0.99 ± 0.13                                    | 1.14 ± 0.20                                     |
|                                   | b    | -180227.72 ± 0.01                        | -0.01 ± 0.12                                  | -0.04 ± 0.20                                   | -0.93 ± 0.16                                    | 0.79 ± 0.21                                     |
|                                   | ba   | -180232.65 ± 0.01                        | 0.09 ± 0.08                                   | 0.06 ± 0.08                                    | -0.21 ± 0.05                                    | 0.28 ± 0.10                                     |
|                                   | bad  | -180231.64 ± 0.01                        | 0.18 ± 0.08                                   | 0.15 ± 0.10                                    | -0.22 ± 0.05                                    | 0.40 ± 0.18                                     |
|                                   | badq | -180261.12 ± 0.01                        | 0.31 ± 0.13                                   | 0.21 ± 0.20                                    | -0.58 ± 0.09                                    | 0.64 ± 0.35                                     |
| $\text{CH}_3\text{CONH}_2$        |      | -131075.55 ± 0.01                        | -0.30 ± 0.11                                  | -0.27 ± 0.14                                   | -1.03 ± 0.13                                    | 0.47 ± 0.16                                     |
|                                   | b    | -131075.53 ± 0.01                        | -0.24 ± 0.16                                  | -0.32 ± 0.23                                   | -1.43 ± 0.13                                    | 0.69 ± 0.25                                     |
|                                   | ba   | -131080.95 ± 0.01                        | -0.11 ± 0.09                                  | -0.09 ± 0.11                                   | -0.84 ± 0.10                                    | 0.67 ± 0.10                                     |
|                                   | bad  | -131081.99 ± 0.01                        | -0.12 ± 0.11                                  | -0.13 ± 0.12                                   | -0.82 ± 0.11                                    | 0.57 ± 0.10                                     |
|                                   | badq | -131071.90 ± 0.01                        | -0.28 ± 0.08                                  | -0.27 ± 0.11                                   | -0.88 ± 0.10                                    | 0.35 ± 0.09                                     |
| $\text{H}_2\text{O}$              |      | -47893.37 ± 0.00                         | 0.04 ± 0.02                                   | 0.04 ± 0.03                                    | -0.18 ± 0.01                                    | 0.24 ± 0.04                                     |
|                                   | b    | -47893.41 ± 0.00                         | 0.00 ± 0.03                                   | 0.00 ± 0.04                                    | -0.18 ± 0.01                                    | 0.16 ± 0.06                                     |
|                                   | ba   | -47893.40 ± 0.00                         | -0.04 ± 0.04                                  | -0.05 ± 0.06                                   | -0.37 ± 0.02                                    | 0.23 ± 0.10                                     |
|                                   | bad  | -47893.40 ± 0.00                         | -0.04 ± 0.04                                  | -0.05 ± 0.06                                   | -0.37 ± 0.02                                    | 0.23 ± 0.10                                     |
|                                   | badq | -47893.40 ± 0.00                         | -0.04 ± 0.04                                  | -0.05 ± 0.06                                   | -0.37 ± 0.02                                    | 0.23 ± 0.10                                     |
| $\text{C}_2\text{H}_5\text{OH}$   |      | -97162.98 ± 0.01                         | 0.07 ± 0.09                                   | 0.06 ± 0.11                                    | -0.40 ± 0.07                                    | 0.37 ± 0.18                                     |

*Continued on next page*

Table 34 – *Continued from previous page*

| Molec.                           | MM'  | $\Delta G_{\text{TI3}}^{N_{\lambda}=11}$ | $\Delta\Delta G_{\text{TI}}^{N_{\lambda}=2}$ | $\Delta\Delta G_{\text{BAR}}^{N_{\lambda}=2}$ | $\Delta\Delta G_{\text{IEXP}}^{N_{\lambda}=1}$ | $\Delta\Delta G_{\text{DEXP}}^{N_{\lambda}=1}$ |
|----------------------------------|------|------------------------------------------|----------------------------------------------|-----------------------------------------------|------------------------------------------------|------------------------------------------------|
|                                  | b    | -97163.06 ± 0.00                         | 0.06 ± 0.07                                  | 0.06 ± 0.08                                   | -0.14 ± 0.09                                   | 0.26 ± 0.09                                    |
|                                  | ba   | -97163.47 ± 0.01                         | 0.31 ± 0.20                                  | 0.11 ± 0.23                                   | -0.65 ± 0.10                                   | 0.38 ± 0.38                                    |
|                                  | bad  | -97163.66 ± 0.01                         | 0.11 ± 0.21                                  | -0.11 ± 0.19                                  | -0.67 ± 0.10                                   | 0.22 ± 0.21                                    |
|                                  | badq | -97163.34 ± 0.01                         | 0.20 ± 0.16                                  | 0.07 ± 0.18                                   | -0.61 ± 0.10                                   | 0.59 ± 0.20                                    |
| C <sub>6</sub> H <sub>6</sub>    |      | -145560.00 ± 0.01                        | -0.03 ± 0.06                                 | -0.04 ± 0.08                                  | -0.60 ± 0.08                                   | 0.51 ± 0.09                                    |
|                                  | b    | -145560.43 ± 0.00                        | -0.05 ± 0.05                                 | -0.05 ± 0.05                                  | -0.27 ± 0.06                                   | 0.15 ± 0.08                                    |
|                                  | ba   | -145565.77 ± 0.00                        | -0.09 ± 0.04                                 | -0.09 ± 0.05                                  | -0.28 ± 0.07                                   | 0.12 ± 0.04                                    |
|                                  | bad  | -145564.02 ± 0.00                        | -0.06 ± 0.04                                 | -0.06 ± 0.04                                  | -0.22 ± 0.06                                   | 0.12 ± 0.04                                    |
|                                  | badq | -145563.39 ± 0.00                        | -0.05 ± 0.03                                 | -0.05 ± 0.04                                  | -0.18 ± 0.07                                   | 0.11 ± 0.03                                    |
| C <sub>6</sub> H <sub>5</sub> OH |      | -192693.96 ± 0.01                        | 0.04 ± 0.11                                  | -0.04 ± 0.16                                  | -0.78 ± 0.08                                   | 0.56 ± 0.19                                    |
|                                  | b    | -192694.26 ± 0.01                        | 0.02 ± 0.08                                  | -0.01 ± 0.10                                  | -0.48 ± 0.06                                   | 0.38 ± 0.12                                    |
|                                  | ba   | -192699.45 ± 0.00                        | 0.02 ± 0.04                                  | 0.01 ± 0.05                                   | -0.36 ± 0.04                                   | 0.37 ± 0.07                                    |
|                                  | bad  | -192698.00 ± 0.01                        | 0.06 ± 0.04                                  | 0.05 ± 0.05                                   | -0.34 ± 0.04                                   | 0.42 ± 0.07                                    |
|                                  | badq | -192712.32 ± 0.00                        | 0.04 ± 0.05                                  | 0.03 ± 0.06                                   | -0.41 ± 0.04                                   | 0.45 ± 0.07                                    |

Table 35: MM-to-QM gas-phase solvation free energy correction values from 3- $\lambda$  states simulated for 20 ps

| Molec.                                       | MM'  | $\Delta G_{\text{TI3}}^{N_\lambda=11}$ | $\Delta\Delta G_{\text{TI}}^{N_\lambda=3}$ | $\Delta\Delta G_{\text{BAR}}^{N_\lambda=3}$ | $\Delta\Delta G_{\text{IEXP}}^{N_\lambda=2}$ | $\Delta\Delta G_{\text{DEXP}}^{N_\lambda=2}$ |
|----------------------------------------------|------|----------------------------------------|--------------------------------------------|---------------------------------------------|----------------------------------------------|----------------------------------------------|
| CO <sub>3</sub> <sup>2-</sup>                |      | -165234.08 ± 0.05                      | 0.49 ± 1.26                                | 1.41 ± 0.62                                 | -1.85 ± 0.52                                 | 4.77 ± 0.39                                  |
|                                              | b    | -165233.97 ± 0.00                      | 0.46 ± 0.15                                | 0.45 ± 0.12                                 | 0.47 ± 0.14                                  | 0.36 ± 0.17                                  |
|                                              | ba   | -165298.74 ± 0.00                      | 0.37 ± 0.10                                | 0.46 ± 0.08                                 | 0.16 ± 0.11                                  | 0.78 ± 0.07                                  |
|                                              | bad  | -165350.72 ± 0.00                      | 0.14 ± 0.10                                | 0.14 ± 0.08                                 | 0.13 ± 0.10                                  | 0.12 ± 0.10                                  |
|                                              | badq | -165337.39 ± 0.00                      | 0.20 ± 0.09                                | 0.19 ± 0.07                                 | 0.18 ± 0.08                                  | 0.17 ± 0.09                                  |
| CH <sub>3</sub> NH <sub>3</sub> <sup>+</sup> |      | -60350.21 ± 0.02                       | -0.53 ± 0.18                               | -0.41 ± 0.15                                | -0.48 ± 0.21                                 | -0.28 ± 0.19                                 |
|                                              | b    | -60350.95 ± 0.01                       | -0.07 ± 0.11                               | -0.04 ± 0.09                                | -0.31 ± 0.12                                 | 0.26 ± 0.11                                  |
|                                              | ba   | -60353.33 ± 0.01                       | 0.02 ± 0.07                                | 0.04 ± 0.06                                 | -0.07 ± 0.09                                 | 0.17 ± 0.07                                  |
|                                              | bad  | -60353.51 ± 0.01                       | 0.03 ± 0.06                                | 0.03 ± 0.05                                 | 0.03 ± 0.07                                  | 0.04 ± 0.07                                  |
|                                              | badq | -60350.03 ± 0.01                       | 0.00 ± 0.08                                | 0.01 ± 0.06                                 | 0.02 ± 0.09                                  | 0.01 ± 0.09                                  |
| NH <sub>4</sub> <sup>+</sup>                 |      | -35656.21 ± 0.00                       | 0.07 ± 0.02                                | 0.07 ± 0.02                                 | 0.06 ± 0.03                                  | 0.07 ± 0.03                                  |
|                                              | b    | -35656.29 ± 0.00                       | 0.05 ± 0.03                                | 0.05 ± 0.02                                 | 0.04 ± 0.03                                  | 0.05 ± 0.03                                  |
|                                              | ba   | -35657.44 ± 0.00                       | 0.03 ± 0.04                                | 0.02 ± 0.03                                 | 0.06 ± 0.04                                  | -0.01 ± 0.04                                 |
|                                              | bad  | -35657.44 ± 0.00                       | 0.03 ± 0.04                                | 0.02 ± 0.03                                 | 0.06 ± 0.04                                  | -0.01 ± 0.04                                 |
|                                              | badq | -35656.32 ± 0.00                       | 0.01 ± 0.03                                | 0.01 ± 0.02                                 | -0.01 ± 0.03                                 | 0.03 ± 0.03                                  |
| CH <sub>3</sub> CO <sub>2</sub> <sup>-</sup> |      | -143225.98 ± 0.03                      | 0.31 ± 0.43                                | 0.06 ± 0.35                                 | -0.38 ± 0.32                                 | -0.36 ± 0.43                                 |
|                                              | b    | -143225.39 ± 0.02                      | -0.32 ± 0.30                               | -0.31 ± 0.27                                | -1.01 ± 0.24                                 | 0.06 ± 0.35                                  |
|                                              | ba   | -143274.83 ± 0.02                      | 0.73 ± 0.18                                | 0.61 ± 0.19                                 | 0.41 ± 0.27                                  | 0.90 ± 0.19                                  |
|                                              | bad  | -143279.87 ± 0.02                      | -0.10 ± 0.29                               | -0.03 ± 0.22                                | 0.17 ± 0.29                                  | -0.29 ± 0.28                                 |
|                                              | badq | -143295.75 ± 0.02                      | 0.08 ± 0.25                                | 0.10 ± 0.18                                 | 0.14 ± 0.24                                  | 0.02 ± 0.27                                  |
| H <sub>3</sub> O <sup>+</sup>                |      | -48069.23 ± 0.01                       | 0.02 ± 0.34                                | -0.06 ± 0.25                                | 0.06 ± 0.28                                  | 0.00 ± 0.39                                  |
|                                              | b    | -48069.30 ± 0.01                       | 0.04 ± 0.27                                | 0.03 ± 0.32                                 | 0.06 ± 0.38                                  | -0.11 ± 0.35                                 |
|                                              | ba   | -48069.33 ± 0.00                       | 0.03 ± 0.08                                | 0.06 ± 0.06                                 | -0.01 ± 0.08                                 | 0.13 ± 0.09                                  |

*Continued on next page*

Table 35 – *Continued from previous page*

| Molec.                           | MM'  | $\Delta G_{\text{TI3}}^{N_i=11}$ | $\Delta\Delta G_{\text{TI}}^{N_i=3}$ | $\Delta\Delta G_{\text{BAR}}^{N_i=3}$ | $\Delta\Delta G_{\text{IEXP}}^{N_i=2}$ | $\Delta\Delta G_{\text{DEXP}}^{N_i=2}$ |
|----------------------------------|------|----------------------------------|--------------------------------------|---------------------------------------|----------------------------------------|----------------------------------------|
| C <sub>6</sub> H <sub>5</sub> Cl | bad  | -48069.33 ± 0.00                 | 0.03 ± 0.08                          | 0.06 ± 0.06                           | -0.01 ± 0.08                           | 0.13 ± 0.09                            |
|                                  | badq | -48069.38 ± 0.00                 | 0.10 ± 0.09                          | 0.14 ± 0.07                           | 0.08 ± 0.12                            | 0.20 ± 0.09                            |
|                                  |      | -433852.25 ± 0.02                | 0.08 ± 0.21                          | 0.02 ± 0.15                           | 0.09 ± 0.24                            | -0.23 ± 0.27                           |
|                                  | b    | -433850.13 ± 0.01                | 0.04 ± 0.13                          | 0.02 ± 0.10                           | 0.07 ± 0.17                            | 0.08 ± 0.10                            |
|                                  | ba   | -433853.89 ± 0.01                | -0.03 ± 0.13                         | -0.04 ± 0.10                          | -0.11 ± 0.13                           | 0.02 ± 0.16                            |
|                                  | bad  | -433855.52 ± 0.01                | -0.21 ± 0.09                         | -0.13 ± 0.06                          | -0.24 ± 0.09                           | -0.01 ± 0.08                           |
| C <sub>6</sub> H <sub>14</sub>   | badq | -433858.60 ± 0.01                | -0.06 ± 0.09                         | -0.02 ± 0.07                          | -0.10 ± 0.09                           | 0.03 ± 0.10                            |
|                                  |      | -148579.56 ± 0.01                | -0.06 ± 0.17                         | -0.10 ± 0.13                          | -0.28 ± 0.18                           | 0.15 ± 0.18                            |
|                                  | b    | -148580.35 ± 0.01                | -0.01 ± 0.10                         | -0.03 ± 0.07                          | -0.21 ± 0.10                           | 0.15 ± 0.08                            |
|                                  | ba   | -148579.69 ± 0.01                | -0.09 ± 0.14                         | -0.08 ± 0.11                          | -0.14 ± 0.14                           | -0.10 ± 0.16                           |
|                                  | bad  | -148579.55 ± 0.01                | 0.03 ± 0.11                          | 0.04 ± 0.09                           | -0.08 ± 0.12                           | 0.16 ± 0.11                            |
|                                  | badq | -148577.13 ± 0.01                | 0.06 ± 0.11                          | 0.05 ± 0.08                           | -0.03 ± 0.12                           | 0.18 ± 0.09                            |
| CH <sub>3</sub> OH               |      | -72528.21 ± 0.01                 | 0.03 ± 0.09                          | 0.03 ± 0.08                           | -0.24 ± 0.08                           | 0.22 ± 0.12                            |
|                                  | b    | -72528.26 ± 0.01                 | 0.01 ± 0.08                          | 0.02 ± 0.07                           | -0.23 ± 0.07                           | 0.19 ± 0.11                            |
|                                  | ba   | -72528.29 ± 0.01                 | 0.02 ± 0.07                          | 0.03 ± 0.06                           | -0.23 ± 0.06                           | 0.26 ± 0.08                            |
|                                  | bad  | -72528.28 ± 0.01                 | 0.09 ± 0.08                          | 0.09 ± 0.07                           | -0.16 ± 0.07                           | 0.30 ± 0.10                            |
|                                  | badq | -72528.80 ± 0.01                 | 0.06 ± 0.08                          | 0.07 ± 0.07                           | -0.19 ± 0.07                           | 0.29 ± 0.10                            |
|                                  |      | -50024.21 ± 0.00                 | -0.08 ± 0.06                         | -0.07 ± 0.05                          | -0.11 ± 0.07                           | -0.02 ± 0.06                           |
| C <sub>2</sub> H <sub>6</sub>    | b    | -50024.36 ± 0.00                 | 0.03 ± 0.05                          | 0.04 ± 0.04                           | -0.05 ± 0.04                           | 0.12 ± 0.10                            |
|                                  | ba   | -50024.20 ± 0.00                 | 0.03 ± 0.03                          | 0.03 ± 0.03                           | 0.01 ± 0.05                            | 0.05 ± 0.05                            |
|                                  | bad  | -50024.28 ± 0.00                 | 0.00 ± 0.02                          | 0.01 ± 0.02                           | -0.03 ± 0.02                           | 0.04 ± 0.03                            |
|                                  | badq | -50024.44 ± 0.00                 | 0.06 ± 0.02                          | 0.06 ± 0.02                           | 0.03 ± 0.02                            | 0.10 ± 0.02                            |
|                                  |      | -145699.56 ± 0.02                | -0.18 ± 0.20                         | -0.10 ± 0.18                          | -0.71 ± 0.20                           | 0.51 ± 0.20                            |
|                                  | b    | -145699.47 ± 0.02                | 0.48 ± 0.35                          | 0.50 ± 0.26                           | -0.11 ± 0.36                           | 1.15 ± 0.28                            |

*Continued on next page*

Table 35 – *Continued from previous page*

| Molec.                            | MM'  | $\Delta G_{\text{TI3}}^{N_i=11}$ | $\Delta\Delta G_{\text{TI}}^{N_i=3}$ | $\Delta\Delta G_{\text{BAR}}^{N_i=3}$ | $\Delta\Delta G_{\text{IEXP}}^{N_i=2}$ | $\Delta\Delta G_{\text{DEXP}}^{N_i=2}$ |
|-----------------------------------|------|----------------------------------|--------------------------------------|---------------------------------------|----------------------------------------|----------------------------------------|
|                                   | ba   | -145697.65 ± 0.01                | 0.00 ± 0.09                          | 0.02 ± 0.08                           | -0.23 ± 0.09                           | 0.23 ± 0.11                            |
|                                   | bad  | -145698.65 ± 0.01                | 0.11 ± 0.13                          | 0.13 ± 0.10                           | -0.18 ± 0.11                           | 0.36 ± 0.15                            |
|                                   | badq | -145689.76 ± 0.01                | -0.15 ± 0.11                         | -0.09 ± 0.08                          | -0.35 ± 0.09                           | 0.12 ± 0.12                            |
| $\text{C}(\text{NH}_2)_3^+$       |      | -128901.22 ± 0.03                | 0.62 ± 0.38                          | 0.67 ± 0.30                           | 0.33 ± 0.32                            | -0.14 ± 0.56                           |
|                                   | b    | -128902.74 ± 0.03                | 1.72 ± 0.43                          | 0.83 ± 0.43                           | -0.87 ± 0.24                           | 2.30 ± 0.44                            |
|                                   | ba   | -128929.38 ± 0.03                | 0.39 ± 0.19                          | 0.36 ± 0.18                           | -0.13 ± 0.16                           | 0.66 ± 0.21                            |
|                                   | bad  | -128932.44 ± 0.02                | 0.20 ± 0.18                          | 0.17 ± 0.17                           | 0.01 ± 0.18                            | 0.18 ± 0.25                            |
|                                   | badq | -128914.70 ± 0.02                | -0.21 ± 0.17                         | -0.13 ± 0.13                          | -0.29 ± 0.14                           | -0.04 ± 0.16                           |
| $\text{C}_6\text{H}_5\text{NH}_2$ |      | -180227.49 ± 0.01                | -0.19 ± 0.14                         | -0.12 ± 0.12                          | -0.65 ± 0.11                           | 0.34 ± 0.16                            |
|                                   | b    | -180227.72 ± 0.01                | 0.11 ± 0.09                          | 0.09 ± 0.09                           | -0.38 ± 0.10                           | 0.53 ± 0.12                            |
|                                   | ba   | -180232.65 ± 0.01                | -0.01 ± 0.06                         | 0.01 ± 0.05                           | -0.13 ± 0.05                           | 0.12 ± 0.07                            |
|                                   | bad  | -180231.64 ± 0.01                | 0.06 ± 0.08                          | 0.08 ± 0.06                           | -0.09 ± 0.06                           | 0.21 ± 0.11                            |
|                                   | badq | -180261.12 ± 0.01                | 0.09 ± 0.11                          | 0.13 ± 0.10                           | -0.28 ± 0.10                           | 0.43 ± 0.17                            |
| $\text{CH}_3\text{CONH}_2$        |      | -131075.55 ± 0.01                | -0.12 ± 0.09                         | -0.15 ± 0.08                          | -0.53 ± 0.10                           | 0.24 ± 0.09                            |
|                                   | b    | -131075.53 ± 0.01                | -0.37 ± 0.09                         | -0.35 ± 0.11                          | -0.96 ± 0.10                           | 0.21 ± 0.14                            |
|                                   | ba   | -131080.95 ± 0.01                | -0.09 ± 0.07                         | -0.09 ± 0.06                          | -0.48 ± 0.07                           | 0.30 ± 0.07                            |
|                                   | bad  | -131081.99 ± 0.01                | -0.18 ± 0.07                         | -0.17 ± 0.07                          | -0.53 ± 0.07                           | 0.19 ± 0.07                            |
|                                   | badq | -131071.90 ± 0.01                | -0.11 ± 0.05                         | -0.14 ± 0.05                          | -0.46 ± 0.07                           | 0.18 ± 0.06                            |
| $\text{H}_2\text{O}$              |      | -47893.37 ± 0.00                 | 0.01 ± 0.01                          | 0.01 ± 0.01                           | -0.10 ± 0.01                           | 0.12 ± 0.02                            |
|                                   | b    | -47893.41 ± 0.00                 | 0.00 ± 0.02                          | 0.00 ± 0.02                           | -0.09 ± 0.01                           | 0.09 ± 0.03                            |
|                                   | ba   | -47893.40 ± 0.00                 | -0.01 ± 0.03                         | -0.02 ± 0.04                          | -0.18 ± 0.04                           | 0.13 ± 0.06                            |
|                                   | bad  | -47893.40 ± 0.00                 | -0.01 ± 0.03                         | -0.02 ± 0.04                          | -0.18 ± 0.04                           | 0.13 ± 0.06                            |
|                                   | badq | -47893.40 ± 0.00                 | -0.01 ± 0.03                         | -0.02 ± 0.04                          | -0.18 ± 0.04                           | 0.13 ± 0.06                            |
| $\text{C}_2\text{H}_5\text{OH}$   |      | -97162.98 ± 0.01                 | -0.02 ± 0.13                         | -0.01 ± 0.08                          | -0.17 ± 0.11                           | 0.13 ± 0.12                            |

*Continued on next page*

Table 35 – *Continued from previous page*

| Molec.                           | MM'  | $\Delta G_{\text{TI3}}^{N_i=11}$ | $\Delta\Delta G_{\text{TI}}^{N_i=3}$ | $\Delta\Delta G_{\text{BAR}}^{N_i=3}$ | $\Delta\Delta G_{\text{IEXP}}^{N_i=2}$ | $\Delta\Delta G_{\text{DEXP}}^{N_i=2}$ |
|----------------------------------|------|----------------------------------|--------------------------------------|---------------------------------------|----------------------------------------|----------------------------------------|
|                                  | b    | -97163.06 ± 0.00                 | 0.05 ± 0.06                          | 0.05 ± 0.05                           | -0.05 ± 0.07                           | 0.15 ± 0.07                            |
|                                  | ba   | -97163.47 ± 0.01                 | 0.12 ± 0.19                          | 0.14 ± 0.15                           | -0.18 ± 0.16                           | 0.27 ± 0.23                            |
|                                  | bad  | -97163.66 ± 0.01                 | 0.11 ± 0.18                          | 0.09 ± 0.14                           | -0.18 ± 0.12                           | 0.17 ± 0.19                            |
|                                  | badq | -97163.34 ± 0.01                 | 0.09 ± 0.19                          | 0.10 ± 0.13                           | -0.15 ± 0.15                           | 0.26 ± 0.17                            |
| C <sub>6</sub> H <sub>6</sub>    |      | -145560.00 ± 0.01                | 0.01 ± 0.08                          | 0.00 ± 0.06                           | -0.25 ± 0.07                           | 0.26 ± 0.07                            |
|                                  | b    | -145560.43 ± 0.00                | -0.02 ± 0.04                         | -0.02 ± 0.03                          | -0.13 ± 0.04                           | 0.08 ± 0.05                            |
|                                  | ba   | -145565.77 ± 0.00                | -0.04 ± 0.03                         | -0.05 ± 0.03                          | -0.15 ± 0.04                           | 0.05 ± 0.03                            |
|                                  | bad  | -145564.02 ± 0.00                | 0.40 ± 0.03                          | 0.31 ± 0.02                           | 0.22 ± 0.04                            | 0.40 ± 0.03                            |
|                                  | badq | -145563.39 ± 0.00                | 0.01 ± 0.03                          | 0.00 ± 0.02                           | -0.07 ± 0.04                           | 0.07 ± 0.03                            |
| C <sub>6</sub> H <sub>5</sub> OH |      | -192693.96 ± 0.01                | 0.07 ± 0.08                          | 0.05 ± 0.07                           | -0.33 ± 0.07                           | 0.38 ± 0.11                            |
|                                  | b    | -192694.26 ± 0.01                | 0.01 ± 0.08                          | 0.01 ± 0.06                           | -0.22 ± 0.06                           | 0.20 ± 0.08                            |
|                                  | ba   | -192699.45 ± 0.00                | 0.02 ± 0.05                          | 0.02 ± 0.04                           | -0.16 ± 0.04                           | 0.20 ± 0.05                            |
|                                  | bad  | -192698.00 ± 0.01                | -0.01 ± 0.05                         | 0.00 ± 0.04                           | -0.19 ± 0.06                           | 0.19 ± 0.06                            |
|                                  | badq | -192712.32 ± 0.00                | 0.01 ± 0.05                          | 0.02 ± 0.04                           | -0.20 ± 0.04                           | 0.23 ± 0.05                            |

Table 36: MM-to-QM gas-phase solvation free energy correction values from 6- $\lambda$  states simulated for 20 ps

| Molec.                                       | MM'  | $\Delta G_{\text{TI3}}^{N_\lambda=11}$ | $\Delta\Delta G_{\text{TI}}^{N_\lambda=6}$ | $\Delta\Delta G_{\text{BAR}}^{N_\lambda=6}$ | $\Delta\Delta G_{\text{IEXP}}^{N_\lambda=5}$ | $\Delta\Delta G_{\text{DEXP}}^{N_\lambda=5}$ |
|----------------------------------------------|------|----------------------------------------|--------------------------------------------|---------------------------------------------|----------------------------------------------|----------------------------------------------|
| CO <sub>3</sub> <sup>2-</sup>                |      | -165234.08 ± 0.05                      | -0.63 ± 0.73                               | -0.77 ± 0.62                                | -0.27 ± 0.74                                 | -0.05 ± 0.56                                 |
|                                              | b    | -165233.97 ± 0.00                      | 0.48 ± 0.10                                | 0.47 ± 0.07                                 | 0.48 ± 0.09                                  | 0.45 ± 0.11                                  |
|                                              | ba   | -165298.74 ± 0.00                      | 0.27 ± 0.07                                | 0.30 ± 0.05                                 | 0.18 ± 0.07                                  | 0.42 ± 0.06                                  |
|                                              | bad  | -165350.72 ± 0.00                      | 0.10 ± 0.07                                | 0.10 ± 0.05                                 | 0.09 ± 0.07                                  | 0.09 ± 0.07                                  |
|                                              | badq | -165337.39 ± 0.00                      | 0.21 ± 0.07                                | 0.20 ± 0.05                                 | 0.21 ± 0.08                                  | 0.19 ± 0.07                                  |
| CH <sub>3</sub> NH <sub>3</sub> <sup>+</sup> |      | -60350.21 ± 0.02                       | 0.02 ± 0.14                                | 0.03 ± 0.10                                 | 0.04 ± 0.14                                  | 0.05 ± 0.13                                  |
|                                              | b    | -60350.95 ± 0.01                       | -0.12 ± 0.10                               | -0.11 ± 0.07                                | -0.19 ± 0.11                                 | -0.03 ± 0.10                                 |
|                                              | ba   | -60353.33 ± 0.01                       | 0.15 ± 0.05                                | 0.14 ± 0.04                                 | 0.10 ± 0.06                                  | 0.19 ± 0.05                                  |
|                                              | bad  | -60353.51 ± 0.01                       | -0.05 ± 0.05                               | -0.05 ± 0.04                                | -0.04 ± 0.05                                 | -0.05 ± 0.05                                 |
|                                              | badq | -60350.03 ± 0.01                       | 0.04 ± 0.07                                | 0.04 ± 0.04                                 | 0.05 ± 0.07                                  | 0.03 ± 0.06                                  |
| NH <sub>4</sub> <sup>+</sup>                 |      | -35656.21 ± 0.00                       | 0.09 ± 0.02                                | 0.09 ± 0.01                                 | 0.09 ± 0.02                                  | 0.09 ± 0.02                                  |
|                                              | b    | -35656.29 ± 0.00                       | 0.04 ± 0.02                                | 0.04 ± 0.01                                 | 0.04 ± 0.02                                  | 0.04 ± 0.02                                  |
|                                              | ba   | -35657.44 ± 0.00                       | -0.03 ± 0.02                               | -0.03 ± 0.01                                | -0.01 ± 0.02                                 | -0.04 ± 0.02                                 |
|                                              | bad  | -35657.44 ± 0.00                       | -0.03 ± 0.02                               | -0.03 ± 0.01                                | -0.01 ± 0.02                                 | -0.04 ± 0.02                                 |
|                                              | badq | -35656.32 ± 0.00                       | 0.00 ± 0.02                                | 0.00 ± 0.01                                 | -0.01 ± 0.01                                 | 0.01 ± 0.02                                  |
| CH <sub>3</sub> CO <sub>2</sub> <sup>-</sup> |      | -143225.98 ± 0.03                      | 0.17 ± 0.25                                | 0.17 ± 0.23                                 | -0.14 ± 0.24                                 | 0.08 ± 0.34                                  |
|                                              | b    | -143225.39 ± 0.02                      | 0.04 ± 0.15                                | 0.04 ± 0.11                                 | -0.31 ± 0.14                                 | 0.31 ± 0.16                                  |
|                                              | ba   | -143274.83 ± 0.02                      | 0.24 ± 0.19                                | 0.24 ± 0.13                                 | 0.25 ± 0.17                                  | 0.16 ± 0.21                                  |
|                                              | bad  | -143279.87 ± 0.02                      | -0.10 ± 0.18                               | -0.09 ± 0.14                                | -0.01 ± 0.19                                 | -0.15 ± 0.19                                 |
|                                              | badq | -143295.75 ± 0.02                      | 0.05 ± 0.17                                | 0.06 ± 0.12                                 | 0.14 ± 0.15                                  | -0.06 ± 0.18                                 |
| H <sub>3</sub> O <sup>+</sup>                |      | -48069.23 ± 0.01                       | -0.25 ± 0.22                               | -0.24 ± 0.16                                | -0.19 ± 0.20                                 | -0.31 ± 0.20                                 |
|                                              | b    | -48069.30 ± 0.01                       | -0.21 ± 0.17                               | -0.19 ± 0.14                                | -0.14 ± 0.22                                 | -0.24 ± 0.18                                 |
|                                              | ba   | -48069.33 ± 0.00                       | 0.05 ± 0.06                                | 0.05 ± 0.04                                 | 0.03 ± 0.06                                  | 0.07 ± 0.06                                  |

*Continued on next page*

Table 36 – *Continued from previous page*

| Molec.                            | MM'  | $\Delta G_{\text{TI3}}^{N_i=11}$ | $\Delta\Delta G_{\text{TI}}^{N_i=6}$ | $\Delta\Delta G_{\text{BAR}}^{N_i=6}$ | $\Delta\Delta G_{\text{IEXP}}^{N_i=5}$ | $\Delta\Delta G_{\text{DEXP}}^{N_i=5}$ |
|-----------------------------------|------|----------------------------------|--------------------------------------|---------------------------------------|----------------------------------------|----------------------------------------|
|                                   | bad  | -48069.33 ± 0.00                 | 0.05 ± 0.06                          | 0.05 ± 0.04                           | 0.03 ± 0.06                            | 0.07 ± 0.06                            |
|                                   | badq | -48069.38 ± 0.00                 | 0.18 ± 0.07                          | 0.19 ± 0.05                           | 0.17 ± 0.07                            | 0.21 ± 0.06                            |
| C <sub>6</sub> H <sub>5</sub> Cl  |      | -433852.25 ± 0.02                | 0.08 ± 0.15                          | 0.07 ± 0.10                           | 0.13 ± 0.15                            | -0.01 ± 0.15                           |
|                                   | b    | -433850.13 ± 0.01                | -0.03 ± 0.09                         | -0.02 ± 0.06                          | -0.02 ± 0.10                           | -0.01 ± 0.09                           |
|                                   | ba   | -433853.89 ± 0.01                | 0.14 ± 0.07                          | 0.13 ± 0.05                           | 0.08 ± 0.06                            | 0.17 ± 0.08                            |
|                                   | bad  | -433855.52 ± 0.01                | -0.08 ± 0.08                         | -0.07 ± 0.05                          | -0.09 ± 0.08                           | -0.04 ± 0.07                           |
|                                   | badq | -433858.60 ± 0.01                | 0.04 ± 0.07                          | 0.05 ± 0.05                           | 0.03 ± 0.07                            | 0.06 ± 0.07                            |
| C <sub>6</sub> H <sub>14</sub>    |      | -148579.56 ± 0.01                | -0.19 ± 0.09                         | -0.20 ± 0.07                          | -0.29 ± 0.11                           | -0.09 ± 0.09                           |
|                                   | b    | -148580.35 ± 0.01                | 0.09 ± 0.06                          | 0.08 ± 0.04                           | 0.01 ± 0.06                            | 0.15 ± 0.05                            |
|                                   | ba   | -148579.69 ± 0.01                | -0.11 ± 0.07                         | -0.10 ± 0.06                          | -0.14 ± 0.08                           | -0.07 ± 0.08                           |
|                                   | bad  | -148579.55 ± 0.01                | -0.02 ± 0.08                         | -0.02 ± 0.06                          | -0.06 ± 0.08                           | 0.03 ± 0.08                            |
|                                   | badq | -148577.13 ± 0.01                | -0.15 ± 0.09                         | -0.14 ± 0.06                          | -0.16 ± 0.08                           | -0.11 ± 0.08                           |
| CH <sub>3</sub> OH                |      | -72528.21 ± 0.01                 | 0.01 ± 0.06                          | 0.00 ± 0.05                           | -0.10 ± 0.06                           | 0.09 ± 0.07                            |
|                                   | b    | -72528.26 ± 0.01                 | 0.01 ± 0.05                          | 0.01 ± 0.04                           | -0.09 ± 0.05                           | 0.09 ± 0.06                            |
|                                   | ba   | -72528.29 ± 0.01                 | -0.03 ± 0.04                         | -0.03 ± 0.03                          | -0.13 ± 0.04                           | 0.08 ± 0.05                            |
|                                   | bad  | -72528.28 ± 0.01                 | -0.07 ± 0.04                         | -0.06 ± 0.04                          | -0.16 ± 0.04                           | 0.04 ± 0.05                            |
|                                   | badq | -72528.80 ± 0.01                 | -0.05 ± 0.05                         | -0.03 ± 0.04                          | -0.14 ± 0.05                           | 0.06 ± 0.05                            |
| C <sub>2</sub> H <sub>6</sub>     |      | -50024.21 ± 0.00                 | -0.02 ± 0.03                         | -0.02 ± 0.02                          | -0.04 ± 0.04                           | 0.00 ± 0.03                            |
|                                   | b    | -50024.36 ± 0.00                 | 0.06 ± 0.03                          | 0.06 ± 0.03                           | 0.03 ± 0.03                            | 0.10 ± 0.05                            |
|                                   | ba   | -50024.20 ± 0.00                 | 0.05 ± 0.02                          | 0.04 ± 0.01                           | 0.04 ± 0.02                            | 0.05 ± 0.02                            |
|                                   | bad  | -50024.28 ± 0.00                 | 0.06 ± 0.02                          | 0.06 ± 0.01                           | 0.04 ± 0.02                            | 0.07 ± 0.02                            |
|                                   | badq | -50024.44 ± 0.00                 | 0.08 ± 0.02                          | 0.08 ± 0.01                           | 0.06 ± 0.02                            | 0.09 ± 0.02                            |
| (CH <sub>2</sub> ) <sub>4</sub> O |      | -145699.56 ± 0.02                | 0.07 ± 0.11                          | 0.08 ± 0.10                           | -0.22 ± 0.13                           | 0.34 ± 0.14                            |
|                                   | b    | -145699.47 ± 0.02                | 0.22 ± 0.16                          | 0.25 ± 0.13                           | -0.11 ± 0.16                           | 0.59 ± 0.17                            |

*Continued on next page*



Table 36 – *Continued from previous page*

| Molec.                            | MM'  | $\Delta G_{\text{TI3}}^{N_i=11}$ | $\Delta\Delta G_{\text{TI}}^{N_i=6}$ | $\Delta\Delta G_{\text{BAR}}^{N_i=6}$ | $\Delta\Delta G_{\text{IEXP}}^{N_i=5}$ | $\Delta\Delta G_{\text{DEXP}}^{N_i=5}$ |
|-----------------------------------|------|----------------------------------|--------------------------------------|---------------------------------------|----------------------------------------|----------------------------------------|
|                                   | ba   | -145697.65 ± 0.01                | 0.13 ± 0.06                          | 0.13 ± 0.04                           | 0.03 ± 0.05                            | 0.22 ± 0.06                            |
|                                   | bad  | -145698.65 ± 0.01                | 0.06 ± 0.07                          | 0.08 ± 0.05                           | -0.05 ± 0.07                           | 0.20 ± 0.08                            |
|                                   | badq | -145689.76 ± 0.01                | 0.01 ± 0.06                          | 0.01 ± 0.04                           | -0.09 ± 0.06                           | 0.11 ± 0.06                            |
| $\text{C}(\text{NH}_2)_3^+$       |      | -128901.22 ± 0.03                | 0.31 ± 0.22                          | 0.36 ± 0.18                           | 0.25 ± 0.22                            | 0.26 ± 0.29                            |
|                                   | b    | -128902.74 ± 0.03                | 0.58 ± 0.24                          | 0.49 ± 0.25                           | -0.34 ± 0.21                           | 1.11 ± 0.31                            |
|                                   | ba   | -128929.38 ± 0.03                | 0.17 ± 0.14                          | 0.18 ± 0.11                           | 0.05 ± 0.18                            | 0.32 ± 0.13                            |
|                                   | bad  | -128932.44 ± 0.02                | -0.08 ± 0.11                         | -0.09 ± 0.09                          | -0.16 ± 0.11                           | -0.05 ± 0.14                           |
|                                   | badq | -128914.70 ± 0.02                | 0.40 ± 0.13                          | 0.39 ± 0.09                           | 0.38 ± 0.14                            | 0.38 ± 0.13                            |
| $\text{C}_6\text{H}_5\text{NH}_2$ |      | -180227.49 ± 0.01                | 0.06 ± 0.07                          | 0.06 ± 0.06                           | -0.16 ± 0.08                           | 0.27 ± 0.08                            |
|                                   | b    | -180227.72 ± 0.01                | 0.04 ± 0.08                          | 0.04 ± 0.06                           | -0.13 ± 0.08                           | 0.21 ± 0.09                            |
|                                   | ba   | -180232.65 ± 0.01                | -0.03 ± 0.04                         | -0.03 ± 0.03                          | -0.08 ± 0.04                           | 0.02 ± 0.05                            |
|                                   | bad  | -180231.64 ± 0.01                | 0.02 ± 0.05                          | 0.02 ± 0.03                           | -0.05 ± 0.04                           | 0.08 ± 0.05                            |
|                                   | badq | -180261.12 ± 0.01                | 0.11 ± 0.08                          | 0.12 ± 0.06                           | -0.03 ± 0.07                           | 0.25 ± 0.09                            |
| $\text{CH}_3\text{CONH}_2$        |      | -131075.55 ± 0.01                | -0.17 ± 0.06                         | -0.18 ± 0.05                          | -0.33 ± 0.06                           | -0.03 ± 0.06                           |
|                                   | b    | -131075.53 ± 0.01                | -0.14 ± 0.08                         | -0.15 ± 0.06                          | -0.38 ± 0.08                           | 0.08 ± 0.08                            |
|                                   | ba   | -131080.95 ± 0.01                | -0.22 ± 0.05                         | -0.21 ± 0.04                          | -0.36 ± 0.05                           | -0.05 ± 0.05                           |
|                                   | bad  | -131081.99 ± 0.01                | -0.11 ± 0.05                         | -0.11 ± 0.04                          | -0.26 ± 0.05                           | 0.03 ± 0.05                            |
|                                   | badq | -131071.90 ± 0.01                | -0.17 ± 0.04                         | -0.17 ± 0.03                          | -0.30 ± 0.04                           | -0.05 ± 0.04                           |
| $\text{H}_2\text{O}$              |      | -47893.37 ± 0.00                 | 0.00 ± 0.01                          | 0.00 ± 0.01                           | -0.04 ± 0.01                           | 0.05 ± 0.01                            |
|                                   | b    | -47893.41 ± 0.00                 | 0.00 ± 0.01                          | 0.00 ± 0.01                           | -0.04 ± 0.02                           | 0.03 ± 0.02                            |
|                                   | ba   | -47893.40 ± 0.00                 | 0.00 ± 0.02                          | 0.00 ± 0.02                           | -0.07 ± 0.02                           | 0.06 ± 0.03                            |
|                                   | bad  | -47893.40 ± 0.00                 | 0.00 ± 0.02                          | 0.00 ± 0.02                           | -0.07 ± 0.02                           | 0.06 ± 0.03                            |
|                                   | badq | -47893.40 ± 0.00                 | 0.00 ± 0.02                          | 0.00 ± 0.02                           | -0.07 ± 0.02                           | 0.06 ± 0.03                            |
| $\text{C}_2\text{H}_5\text{OH}$   |      | -97162.98 ± 0.01                 | -0.03 ± 0.06                         | -0.03 ± 0.04                          | -0.10 ± 0.06                           | 0.04 ± 0.06                            |

*Continued on next page*

Table 36 – *Continued from previous page*

| Molec.                           | MM'  | $\Delta G_{\text{TI3}}^{N_i=11}$ | $\Delta\Delta G_{\text{TI}}^{N_i=6}$ | $\Delta\Delta G_{\text{BAR}}^{N_i=6}$ | $\Delta\Delta G_{\text{IEXP}}^{N_i=5}$ | $\Delta\Delta G_{\text{DEXP}}^{N_i=5}$ |
|----------------------------------|------|----------------------------------|--------------------------------------|---------------------------------------|----------------------------------------|----------------------------------------|
|                                  | b    | -97163.06 ± 0.00                 | 0.00 ± 0.05                          | 0.00 ± 0.03                           | -0.03 ± 0.05                           | 0.04 ± 0.05                            |
|                                  | ba   | -97163.47 ± 0.01                 | -0.02 ± 0.11                         | -0.01 ± 0.08                          | -0.14 ± 0.10                           | 0.09 ± 0.12                            |
|                                  | bad  | -97163.66 ± 0.01                 | 0.00 ± 0.12                          | 0.00 ± 0.08                           | -0.08 ± 0.10                           | 0.04 ± 0.12                            |
|                                  | badq | -97163.34 ± 0.01                 | 0.00 ± 0.09                          | 0.00 ± 0.07                           | -0.11 ± 0.09                           | 0.10 ± 0.10                            |
| C <sub>6</sub> H <sub>6</sub>    |      | -145560.00 ± 0.01                | -0.14 ± 0.05                         | -0.14 ± 0.03                          | -0.24 ± 0.04                           | -0.03 ± 0.05                           |
|                                  | b    | -145560.43 ± 0.00                | -0.06 ± 0.03                         | -0.05 ± 0.02                          | -0.10 ± 0.03                           | -0.01 ± 0.03                           |
|                                  | ba   | -145565.77 ± 0.00                | -0.04 ± 0.02                         | -0.04 ± 0.02                          | -0.08 ± 0.03                           | 0.00 ± 0.03                            |
|                                  | bad  | -145564.02 ± 0.00                | -0.03 ± 0.02                         | -0.03 ± 0.02                          | -0.07 ± 0.03                           | 0.00 ± 0.03                            |
|                                  | badq | -145563.39 ± 0.00                | 0.00 ± 0.02                          | 0.00 ± 0.02                           | -0.03 ± 0.03                           | 0.03 ± 0.03                            |
| C <sub>6</sub> H <sub>5</sub> OH |      | -192693.96 ± 0.01                | -0.02 ± 0.05                         | -0.02 ± 0.04                          | -0.17 ± 0.06                           | 0.12 ± 0.06                            |
|                                  | b    | -192694.26 ± 0.01                | 0.03 ± 0.04                          | 0.03 ± 0.03                           | -0.07 ± 0.04                           | 0.11 ± 0.04                            |
|                                  | ba   | -192699.45 ± 0.00                | 0.00 ± 0.03                          | -0.01 ± 0.02                          | -0.08 ± 0.03                           | 0.06 ± 0.03                            |
|                                  | bad  | -192698.00 ± 0.01                | 0.00 ± 0.03                          | 0.01 ± 0.02                           | -0.07 ± 0.03                           | 0.08 ± 0.03                            |
|                                  | badq | -192712.32 ± 0.00                | -0.02 ± 0.03                         | -0.02 ± 0.02                          | -0.11 ± 0.02                           | 0.07 ± 0.03                            |

Table 37: MM-to-QM net ligand binding free energy correction values 2- $\lambda$  states simulated for 200 ps

| Molec. | MM'  | $\Delta G_{\text{TI3}}^{N_\lambda=11}$ | $\Delta\Delta G_{\text{TI}}^{N_\lambda=2}$ | $\Delta\Delta G_{\text{BAR}}^{N_\lambda=2}$ | $\Delta\Delta G_{\text{IEXP}}^{N_\lambda=1}$ | $\Delta\Delta G_{\text{DEXP}}^{N_\lambda=1}$ |
|--------|------|----------------------------------------|--------------------------------------------|---------------------------------------------|----------------------------------------------|----------------------------------------------|
| BNZ    |      | $0.05 \pm 0.03$                        | $0.10 \pm 0.07$                            | $0.09 \pm 0.08$                             | $-0.03 \pm 0.13$                             | $0.05 \pm 0.18$                              |
|        | b    | $0.10 \pm 0.02$                        | $0.07 \pm 0.06$                            | $0.05 \pm 0.07$                             | $0.02 \pm 0.12$                              | $0.15 \pm 0.16$                              |
|        | ba   | $0.09 \pm 0.02$                        | $-0.10 \pm 0.05$                           | $-0.10 \pm 0.06$                            | $0.02 \pm 0.09$                              | $-0.21 \pm 0.12$                             |
|        | bad  | $0.14 \pm 0.02$                        | $-0.10 \pm 0.06$                           | $-0.07 \pm 0.08$                            | $-0.04 \pm 0.10$                             | $-0.22 \pm 0.12$                             |
|        | badq | $0.06 \pm 0.02$                        | $0.08 \pm 0.06$                            | $0.00 \pm 0.08$                             | $0.00 \pm 0.15$                              | $0.05 \pm 0.21$                              |
| PXY    |      | $0.46 \pm 0.04$                        | $0.03 \pm 0.09$                            | $-0.03 \pm 0.11$                            | $0.90 \pm 0.45$                              | $0.47 \pm 0.35$                              |
|        | b    | $0.43 \pm 0.04$                        | $0.00 \pm 0.09$                            | $-0.10 \pm 0.12$                            | $0.78 \pm 0.54$                              | $-0.12 \pm 0.28$                             |
|        | ba   | $0.36 \pm 0.03$                        | $0.02 \pm 0.08$                            | $-0.03 \pm 0.09$                            | $0.08 \pm 0.22$                              | $-0.06 \pm 0.12$                             |
|        | bad  | $0.46 \pm 0.04$                        | $0.05 \pm 0.08$                            | $0.00 \pm 0.09$                             | $-0.02 \pm 0.23$                             | $-0.06 \pm 0.11$                             |
|        | badq | $0.38 \pm 0.06$                        | $0.16 \pm 0.14$                            | $-0.26 \pm 0.30$                            | $1.05 \pm 0.47$                              | $-1.54 \pm 0.36$                             |
| I4B    |      | $0.06 \pm 0.04$                        | $-0.03 \pm 0.13$                           | $0.11 \pm 0.15$                             | $0.34 \pm 0.34$                              | $-0.02 \pm 0.40$                             |
|        | b    | $0.00 \pm 0.04$                        | $0.11 \pm 0.12$                            | $0.19 \pm 0.12$                             | $0.62 \pm 0.27$                              | $0.27 \pm 0.24$                              |
|        | ba   | $0.12 \pm 0.04$                        | $0.12 \pm 0.11$                            | $0.13 \pm 0.11$                             | $0.48 \pm 0.18$                              | $0.29 \pm 0.36$                              |
|        | bad  | $-0.01 \pm 0.04$                       | $0.02 \pm 0.11$                            | $0.08 \pm 0.11$                             | $0.38 \pm 0.17$                              | $-0.55 \pm 0.30$                             |
|        | badq | $0.11 \pm 0.06$                        | $0.26 \pm 0.15$                            | $0.17 \pm 0.21$                             | $1.11 \pm 0.47$                              | $-0.86 \pm 0.20$                             |
| BZF    |      | $-0.69 \pm 0.07$                       | $-0.26 \pm 0.18$                           | $-0.59 \pm 0.29$                            | $-1.60 \pm 0.67$                             | $-2.18 \pm 0.51$                             |
|        | b    | $-0.70 \pm 0.08$                       | $-0.23 \pm 0.18$                           | $0.03 \pm 0.28$                             | $0.09 \pm 0.43$                              | $-0.43 \pm 0.32$                             |
|        | ba   | $-0.46 \pm 0.05$                       | $-0.15 \pm 0.10$                           | $-0.17 \pm 0.13$                            | $0.29 \pm 0.29$                              | $0.36 \pm 0.22$                              |
|        | bad  | $-0.53 \pm 0.05$                       | $0.07 \pm 0.10$                            | $0.03 \pm 0.13$                             | $0.40 \pm 0.21$                              | $0.11 \pm 0.32$                              |
|        | badq | $-0.42 \pm 0.05$                       | $0.53 \pm 0.13$                            | $0.04 \pm 0.19$                             | $-0.17 \pm 0.31$                             | $-0.62 \pm 0.45$                             |
| DEN    |      | $-0.21 \pm 0.06$                       | $0.17 \pm 0.13$                            | $0.24 \pm 0.22$                             | $0.12 \pm 0.37$                              | $0.82 \pm 0.51$                              |
|        | b    | $-0.18 \pm 0.06$                       | $-0.14 \pm 0.15$                           | $-0.41 \pm 0.18$                            | $-1.28 \pm 0.43$                             | $-1.35 \pm 0.26$                             |
|        | ba   | $-0.25 \pm 0.04$                       | $0.32 \pm 0.09$                            | $0.27 \pm 0.14$                             | $0.02 \pm 0.20$                              | $0.70 \pm 0.23$                              |

*Continued on next page*

Table 37 – Continued from previous page

| Molec. | MM'  | $\Delta G_{\text{TI3}}^{N_i=11}$ | $\Delta\Delta G_{\text{TI}}^{N_i=2}$ | $\Delta\Delta G_{\text{BAR}}^{N_i=2}$ | $\Delta\Delta G_{\text{IEXP}}^{N_i=1}$ | $\Delta\Delta G_{\text{DEXP}}^{N_i=1}$ |
|--------|------|----------------------------------|--------------------------------------|---------------------------------------|----------------------------------------|----------------------------------------|
|        | bad  | $-0.26 \pm 0.04$                 | $0.26 \pm 0.09$                      | $0.12 \pm 0.11$                       | $0.11 \pm 0.18$                        | $0.02 \pm 0.32$                        |
|        | badq | $-0.11 \pm 0.04$                 | $0.24 \pm 0.10$                      | $0.01 \pm 0.13$                       | $-0.18 \pm 0.24$                       | $0.57 \pm 0.58$                        |
| IND    |      | $0.64 \pm 0.08$                  | $1.60 \pm 0.21$                      | $0.00 \pm 0.55$                       | $2.00 \pm 0.65$                        | $-2.18 \pm 0.59$                       |
|        | b    | $0.04 \pm 0.08$                  | $0.18 \pm 0.21$                      | $-0.07 \pm 0.42$                      | $0.91 \pm 0.37$                        | $0.83 \pm 0.61$                        |
|        | ba   | $0.24 \pm 0.07$                  | $0.09 \pm 0.19$                      | $-0.06 \pm 0.26$                      | $0.62 \pm 0.31$                        | $-1.06 \pm 0.29$                       |
|        | bad  | $0.11 \pm 0.05$                  | $0.29 \pm 0.14$                      | $-0.00 \pm 0.19$                      | $0.76 \pm 0.25$                        | $-0.70 \pm 0.30$                       |
|        | badq | $-0.33 \pm 0.12$                 | $2.92 \pm 0.29$                      | $0.79 \pm 0.74$                       | $7.93 \pm 0.62$                        | $-7.10 \pm 0.68$                       |
| OXE    |      | $0.47 \pm 0.04$                  | $0.18 \pm 0.11$                      | $0.05 \pm 0.13$                       | $-0.34 \pm 0.41$                       | $-0.12 \pm 0.21$                       |
|        | b    | $0.59 \pm 0.04$                  | $0.08 \pm 0.09$                      | $0.01 \pm 0.12$                       | $0.19 \pm 0.18$                        | $-0.20 \pm 0.31$                       |
|        | ba   | $0.49 \pm 0.04$                  | $-0.01 \pm 0.09$                     | $0.05 \pm 0.12$                       | $-0.19 \pm 0.37$                       | $-0.03 \pm 0.26$                       |
|        | bad  | $0.64 \pm 0.04$                  | $-0.02 \pm 0.09$                     | $-0.04 \pm 0.10$                      | $-0.32 \pm 0.38$                       | $-0.20 \pm 0.20$                       |
|        | badq | $0.88 \pm 0.05$                  | $0.55 \pm 0.12$                      | $0.12 \pm 0.17$                       | $-0.91 \pm 0.40$                       | $-0.86 \pm 0.23$                       |
| N4B    |      | $0.11 \pm 0.06$                  | $-0.23 \pm 0.14$                     | $-0.11 \pm 0.19$                      | $-0.21 \pm 0.29$                       | $-0.13 \pm 0.43$                       |
|        | b    | $0.03 \pm 0.04$                  | $0.31 \pm 0.10$                      | $0.22 \pm 0.16$                       | $0.45 \pm 0.22$                        | $0.37 \pm 0.33$                        |
|        | ba   | $0.15 \pm 0.04$                  | $0.03 \pm 0.09$                      | $0.05 \pm 0.13$                       | $0.16 \pm 0.23$                        | $0.09 \pm 0.35$                        |
|        | bad  | $0.20 \pm 0.04$                  | $0.00 \pm 0.10$                      | $0.03 \pm 0.14$                       | $0.12 \pm 0.44$                        | $-0.36 \pm 0.22$                       |
|        | badq | $-0.07 \pm 0.05$                 | $0.53 \pm 0.12$                      | $0.31 \pm 0.23$                       | $1.70 \pm 0.31$                        | $-1.36 \pm 0.21$                       |

Table 38: MM-to-QM net ligand binding free energy correction values 3- $\lambda$  states simulated for 200 ps

| Molec. | MM'  | $\Delta G_{\text{TI}3}^{N_\lambda=11}$ | $\Delta\Delta G_{\text{TI}}^{N_\lambda=3}$ | $\Delta\Delta G_{\text{BAR}}^{N_\lambda=3}$ | $\Delta\Delta G_{\text{IEXP}}^{N_\lambda=2}$ | $\Delta\Delta G_{\text{DEXP}}^{N_\lambda=2}$ |
|--------|------|----------------------------------------|--------------------------------------------|---------------------------------------------|----------------------------------------------|----------------------------------------------|
| BNZ    |      | $0.05 \pm 0.03$                        | $0.05 \pm 0.06$                            | $0.05 \pm 0.06$                             | $0.01 \pm 0.10$                              | $0.06 \pm 0.09$                              |
|        | b    | $0.10 \pm 0.02$                        | $0.04 \pm 0.06$                            | $0.05 \pm 0.05$                             | $-0.02 \pm 0.09$                             | $0.11 \pm 0.08$                              |
|        | ba   | $0.09 \pm 0.02$                        | $-0.12 \pm 0.04$                           | $-0.12 \pm 0.04$                            | $-0.05 \pm 0.06$                             | $-0.19 \pm 0.07$                             |
|        | bad  | $0.14 \pm 0.02$                        | $-0.02 \pm 0.05$                           | $-0.03 \pm 0.05$                            | $0.01 \pm 0.07$                              | $-0.09 \pm 0.07$                             |
|        | badq | $0.06 \pm 0.02$                        | $0.00 \pm 0.05$                            | $-0.01 \pm 0.05$                            | $0.02 \pm 0.09$                              | $-0.02 \pm 0.09$                             |
| PXY    |      | $0.46 \pm 0.04$                        | $0.08 \pm 0.09$                            | $0.05 \pm 0.06$                             | $0.11 \pm 0.15$                              | $0.14 \pm 0.14$                              |
|        | b    | $0.43 \pm 0.04$                        | $0.03 \pm 0.09$                            | $0.01 \pm 0.08$                             | $0.06 \pm 0.20$                              | $0.05 \pm 0.14$                              |
|        | ba   | $0.36 \pm 0.03$                        | $-0.03 \pm 0.07$                           | $-0.04 \pm 0.06$                            | $0.10 \pm 0.10$                              | $-0.10 \pm 0.10$                             |
|        | bad  | $0.46 \pm 0.04$                        | $-0.05 \pm 0.07$                           | $-0.05 \pm 0.07$                            | $-0.02 \pm 0.11$                             | $-0.09 \pm 0.09$                             |
|        | badq | $0.38 \pm 0.06$                        | $-0.03 \pm 0.12$                           | $-0.11 \pm 0.13$                            | $0.16 \pm 0.26$                              | $-0.26 \pm 0.30$                             |
| I4B    |      | $0.06 \pm 0.04$                        | $0.03 \pm 0.11$                            | $0.08 \pm 0.09$                             | $0.07 \pm 0.19$                              | $0.13 \pm 0.16$                              |
|        | b    | $0.00 \pm 0.04$                        | $0.19 \pm 0.10$                            | $0.21 \pm 0.08$                             | $0.42 \pm 0.12$                              | $0.11 \pm 0.11$                              |
|        | ba   | $0.12 \pm 0.04$                        | $0.07 \pm 0.10$                            | $0.11 \pm 0.09$                             | $0.04 \pm 0.16$                              | $0.01 \pm 0.18$                              |
|        | bad  | $-0.01 \pm 0.04$                       | $0.15 \pm 0.09$                            | $0.16 \pm 0.07$                             | $0.23 \pm 0.11$                              | $0.02 \pm 0.12$                              |
|        | badq | $0.11 \pm 0.06$                        | $0.02 \pm 0.12$                            | $0.06 \pm 0.11$                             | $0.46 \pm 0.22$                              | $-0.42 \pm 0.22$                             |
| BZF    |      | $-0.69 \pm 0.07$                       | $0.19 \pm 0.15$                            | $0.03 \pm 0.13$                             | $-0.25 \pm 0.47$                             | $-0.56 \pm 0.37$                             |
|        | b    | $-0.70 \pm 0.08$                       | $0.20 \pm 0.16$                            | $0.16 \pm 0.16$                             | $0.08 \pm 0.29$                              | $0.44 \pm 0.38$                              |
|        | ba   | $-0.46 \pm 0.05$                       | $-0.10 \pm 0.10$                           | $-0.12 \pm 0.10$                            | $-0.19 \pm 0.18$                             | $0.00 \pm 0.16$                              |
|        | bad  | $-0.53 \pm 0.05$                       | $-0.09 \pm 0.10$                           | $-0.07 \pm 0.08$                            | $-0.11 \pm 0.15$                             | $-0.10 \pm 0.16$                             |
|        | badq | $-0.42 \pm 0.05$                       | $-0.01 \pm 0.11$                           | $-0.05 \pm 0.09$                            | $-0.24 \pm 0.22$                             | $0.13 \pm 0.27$                              |
| DEN    |      | $-0.21 \pm 0.06$                       | $-0.03 \pm 0.12$                           | $0.03 \pm 0.10$                             | $0.02 \pm 0.21$                              | $0.01 \pm 0.27$                              |
|        | b    | $-0.18 \pm 0.06$                       | $0.00 \pm 0.13$                            | $-0.02 \pm 0.10$                            | $-0.70 \pm 0.34$                             | $-0.38 \pm 0.16$                             |
|        | ba   | $-0.25 \pm 0.04$                       | $0.18 \pm 0.08$                            | $0.17 \pm 0.09$                             | $0.16 \pm 0.11$                              | $0.37 \pm 0.18$                              |

*Continued on next page*

Table 38 – Continued from previous page

| Molec. | MM'  | $\Delta G_{\text{TI3}}^{N_i=11}$ | $\Delta\Delta G_{\text{TI}}^{N_i=3}$ | $\Delta\Delta G_{\text{BAR}}^{N_i=3}$ | $\Delta\Delta G_{\text{IEXP}}^{N_i=2}$ | $\Delta\Delta G_{\text{DEXP}}^{N_i=2}$ |
|--------|------|----------------------------------|--------------------------------------|---------------------------------------|----------------------------------------|----------------------------------------|
|        | bad  | $-0.26 \pm 0.04$                 | $0.02 \pm 0.08$                      | $0.06 \pm 0.08$                       | $-0.00 \pm 0.13$                       | $-0.05 \pm 0.14$                       |
|        | badq | $-0.11 \pm 0.04$                 | $-0.04 \pm 0.08$                     | $-0.04 \pm 0.08$                      | $-0.14 \pm 0.14$                       | $0.13 \pm 0.27$                        |
| IND    |      | $0.64 \pm 0.08$                  | $0.57 \pm 0.18$                      | $0.47 \pm 0.20$                       | $0.65 \pm 0.40$                        | $-0.94 \pm 0.30$                       |
|        | b    | $0.04 \pm 0.08$                  | $0.26 \pm 0.18$                      | $0.19 \pm 0.18$                       | $0.44 \pm 0.27$                        | $0.52 \pm 0.44$                        |
|        | ba   | $0.24 \pm 0.07$                  | $-0.12 \pm 0.13$                     | $-0.12 \pm 0.12$                      | $-0.42 \pm 0.20$                       | $-0.06 \pm 0.23$                       |
|        | bad  | $0.11 \pm 0.05$                  | $0.01 \pm 0.11$                      | $0.01 \pm 0.10$                       | $-0.34 \pm 0.19$                       | $-0.23 \pm 0.15$                       |
|        | badq | $-0.33 \pm 0.12$                 | $0.36 \pm 0.26$                      | $0.03 \pm 0.43$                       | $0.85 \pm 0.78$                        | $-0.75 \pm 0.65$                       |
| OXE    |      | $0.47 \pm 0.04$                  | $0.02 \pm 0.10$                      | $0.04 \pm 0.08$                       | $0.00 \pm 0.17$                        | $-0.13 \pm 0.13$                       |
|        | b    | $0.59 \pm 0.04$                  | $-0.06 \pm 0.08$                     | $-0.04 \pm 0.07$                      | $0.01 \pm 0.10$                        | $-0.09 \pm 0.13$                       |
|        | ba   | $0.49 \pm 0.04$                  | $-0.02 \pm 0.08$                     | $0.01 \pm 0.07$                       | $0.03 \pm 0.13$                        | $-0.11 \pm 0.11$                       |
|        | bad  | $0.64 \pm 0.04$                  | $-0.03 \pm 0.09$                     | $-0.02 \pm 0.07$                      | $-0.17 \pm 0.13$                       | $0.06 \pm 0.13$                        |
|        | badq | $0.88 \pm 0.05$                  | $-0.14 \pm 0.10$                     | $-0.11 \pm 0.10$                      | $-0.45 \pm 0.27$                       | $-0.25 \pm 0.21$                       |
| N4B    |      | $0.11 \pm 0.06$                  | $-0.14 \pm 0.12$                     | $-0.14 \pm 0.11$                      | $-0.01 \pm 0.16$                       | $-0.13 \pm 0.20$                       |
|        | b    | $0.03 \pm 0.04$                  | $-0.00 \pm 0.09$                     | $0.05 \pm 0.09$                       | $-0.02 \pm 0.15$                       | $0.08 \pm 0.16$                        |
|        | ba   | $0.15 \pm 0.04$                  | $-0.10 \pm 0.08$                     | $-0.08 \pm 0.07$                      | $-0.04 \pm 0.12$                       | $-0.12 \pm 0.13$                       |
|        | bad  | $0.20 \pm 0.04$                  | $0.04 \pm 0.08$                      | $0.04 \pm 0.08$                       | $0.14 \pm 0.16$                        | $-0.09 \pm 0.13$                       |
|        | badq | $-0.07 \pm 0.05$                 | $0.41 \pm 0.11$                      | $0.38 \pm 0.12$                       | $0.93 \pm 0.21$                        | $-0.07 \pm 0.30$                       |

Table 39: MM-to-QM net ligand binding free energy correction values 6- $\lambda$  states simulated for 200 ps

| Molec. | MM'  | $\Delta G_{\text{TI3}}^{N_\lambda=11}$ | $\Delta\Delta G_{\text{TI}}^{N_\lambda=6}$ | $\Delta\Delta G_{\text{BAR}}^{N_\lambda=6}$ | $\Delta\Delta G_{\text{IEXP}}^{N_\lambda=5}$ | $\Delta\Delta G_{\text{DEXP}}^{N_\lambda=5}$ |
|--------|------|----------------------------------------|--------------------------------------------|---------------------------------------------|----------------------------------------------|----------------------------------------------|
| BNZ    |      | $0.05 \pm 0.03$                        | $0.05 \pm 0.04$                            | $0.05 \pm 0.04$                             | $0.03 \pm 0.05$                              | $0.07 \pm 0.05$                              |
|        | b    | $0.10 \pm 0.02$                        | $0.01 \pm 0.04$                            | $0.01 \pm 0.03$                             | $-0.01 \pm 0.04$                             | $0.05 \pm 0.04$                              |
|        | ba   | $0.09 \pm 0.02$                        | $0.00 \pm 0.04$                            | $0.00 \pm 0.02$                             | $0.02 \pm 0.04$                              | $-0.02 \pm 0.04$                             |
|        | bad  | $0.14 \pm 0.02$                        | $-0.06 \pm 0.04$                           | $-0.05 \pm 0.02$                            | $-0.05 \pm 0.04$                             | $-0.07 \pm 0.04$                             |
|        | badq | $0.06 \pm 0.02$                        | $-0.01 \pm 0.04$                           | $0.00 \pm 0.03$                             | $-0.01 \pm 0.05$                             | $0.00 \pm 0.05$                              |
| PXY    |      | $0.46 \pm 0.04$                        | $-0.01 \pm 0.06$                           | $-0.01 \pm 0.04$                            | $-0.05 \pm 0.06$                             | $0.05 \pm 0.07$                              |
|        | b    | $0.43 \pm 0.04$                        | $-0.08 \pm 0.06$                           | $-0.08 \pm 0.05$                            | $-0.07 \pm 0.08$                             | $-0.10 \pm 0.08$                             |
|        | ba   | $0.36 \pm 0.03$                        | $0.02 \pm 0.04$                            | $0.01 \pm 0.04$                             | $0.05 \pm 0.07$                              | $-0.02 \pm 0.05$                             |
|        | bad  | $0.46 \pm 0.04$                        | $0.04 \pm 0.05$                            | $0.04 \pm 0.04$                             | $0.03 \pm 0.06$                              | $0.04 \pm 0.05$                              |
|        | badq | $0.38 \pm 0.06$                        | $0.09 \pm 0.08$                            | $0.06 \pm 0.08$                             | $0.18 \pm 0.11$                              | $-0.05 \pm 0.12$                             |
| I4B    |      | $0.06 \pm 0.04$                        | $-0.11 \pm 0.07$                           | $-0.10 \pm 0.06$                            | $-0.06 \pm 0.08$                             | $-0.11 \pm 0.09$                             |
|        | b    | $0.00 \pm 0.04$                        | $-0.00 \pm 0.07$                           | $0.01 \pm 0.06$                             | $0.06 \pm 0.09$                              | $-0.02 \pm 0.09$                             |
|        | ba   | $0.12 \pm 0.04$                        | $-0.03 \pm 0.06$                           | $-0.01 \pm 0.05$                            | $0.02 \pm 0.08$                              | $-0.06 \pm 0.08$                             |
|        | bad  | $-0.01 \pm 0.04$                       | $-0.05 \pm 0.06$                           | $-0.02 \pm 0.04$                            | $0.01 \pm 0.07$                              | $-0.08 \pm 0.07$                             |
|        | badq | $0.11 \pm 0.06$                        | $0.01 \pm 0.08$                            | $0.04 \pm 0.07$                             | $0.12 \pm 0.10$                              | $-0.01 \pm 0.12$                             |
| BZF    |      | $-0.69 \pm 0.07$                       | $-0.07 \pm 0.11$                           | $-0.06 \pm 0.09$                            | $-0.22 \pm 0.16$                             | $-0.15 \pm 0.14$                             |
|        | b    | $-0.70 \pm 0.08$                       | $-0.07 \pm 0.11$                           | $-0.07 \pm 0.08$                            | $-0.08 \pm 0.16$                             | $-0.02 \pm 0.13$                             |
|        | ba   | $-0.46 \pm 0.05$                       | $0.00 \pm 0.06$                            | $-0.02 \pm 0.06$                            | $0.00 \pm 0.08$                              | $0.01 \pm 0.08$                              |
|        | bad  | $-0.53 \pm 0.05$                       | $-0.03 \pm 0.06$                           | $-0.02 \pm 0.05$                            | $-0.03 \pm 0.08$                             | $0.00 \pm 0.08$                              |
|        | badq | $-0.42 \pm 0.05$                       | $0.08 \pm 0.08$                            | $0.05 \pm 0.07$                             | $0.01 \pm 0.10$                              | $0.03 \pm 0.11$                              |
| DEN    |      | $-0.21 \pm 0.06$                       | $0.04 \pm 0.08$                            | $0.04 \pm 0.07$                             | $0.06 \pm 0.10$                              | $0.04 \pm 0.12$                              |
|        | b    | $-0.18 \pm 0.06$                       | $-0.04 \pm 0.08$                           | $-0.03 \pm 0.07$                            | $-0.06 \pm 0.11$                             | $-0.06 \pm 0.10$                             |
|        | ba   | $-0.25 \pm 0.04$                       | $0.13 \pm 0.05$                            | $0.14 \pm 0.05$                             | $0.12 \pm 0.07$                              | $0.16 \pm 0.07$                              |

*Continued on next page*

Table 39 – Continued from previous page

| Molec. | MM'  | $\Delta G_{\text{TI3}}^{N_{\lambda}=11}$ | $\Delta\Delta G_{\text{TI}}^{N_{\lambda}=6}$ | $\Delta\Delta G_{\text{BAR}}^{N_{\lambda}=6}$ | $\Delta\Delta G_{\text{IEXP}}^{N_{\lambda}=5}$ | $\Delta\Delta G_{\text{DEXP}}^{N_{\lambda}=5}$ |
|--------|------|------------------------------------------|----------------------------------------------|-----------------------------------------------|------------------------------------------------|------------------------------------------------|
|        | bad  | $-0.26 \pm 0.04$                         | $-0.03 \pm 0.05$                             | $-0.03 \pm 0.05$                              | $-0.02 \pm 0.07$                               | $-0.05 \pm 0.07$                               |
|        | badq | $-0.11 \pm 0.04$                         | $-0.07 \pm 0.06$                             | $-0.08 \pm 0.06$                              | $-0.11 \pm 0.08$                               | $-0.02 \pm 0.10$                               |
| IND    |      | $0.64 \pm 0.08$                          | $0.15 \pm 0.11$                              | $0.17 \pm 0.10$                               | $0.40 \pm 0.17$                                | $-0.22 \pm 0.18$                               |
|        | b    | $0.04 \pm 0.08$                          | $-0.08 \pm 0.11$                             | $-0.08 \pm 0.09$                              | $0.07 \pm 0.15$                                | $-0.25 \pm 0.15$                               |
|        | ba   | $0.24 \pm 0.07$                          | $-0.01 \pm 0.09$                             | $-0.03 \pm 0.08$                              | $0.08 \pm 0.14$                                | $0.01 \pm 0.11$                                |
|        | bad  | $0.11 \pm 0.05$                          | $0.08 \pm 0.07$                              | $0.09 \pm 0.07$                               | $0.12 \pm 0.10$                                | $-0.00 \pm 0.08$                               |
|        | badq | $-0.33 \pm 0.12$                         | $0.27 \pm 0.17$                              | $0.21 \pm 0.18$                               | $0.34 \pm 0.41$                                | $0.98 \pm 0.33$                                |
| OXE    |      | $0.47 \pm 0.04$                          | $0.01 \pm 0.06$                              | $0.03 \pm 0.05$                               | $0.01 \pm 0.07$                                | $-0.02 \pm 0.08$                               |
|        | b    | $0.59 \pm 0.04$                          | $-0.05 \pm 0.05$                             | $-0.05 \pm 0.05$                              | $-0.06 \pm 0.07$                               | $-0.02 \pm 0.07$                               |
|        | ba   | $0.49 \pm 0.04$                          | $0.00 \pm 0.05$                              | $0.00 \pm 0.04$                               | $0.05 \pm 0.07$                                | $-0.04 \pm 0.07$                               |
|        | bad  | $0.64 \pm 0.04$                          | $0.06 \pm 0.05$                              | $0.06 \pm 0.05$                               | $0.04 \pm 0.07$                                | $0.05 \pm 0.07$                                |
|        | badq | $0.88 \pm 0.05$                          | $0.10 \pm 0.07$                              | $0.11 \pm 0.07$                               | $0.14 \pm 0.10$                                | $0.02 \pm 0.10$                                |
| N4B    |      | $0.11 \pm 0.06$                          | $-0.15 \pm 0.08$                             | $-0.15 \pm 0.07$                              | $-0.12 \pm 0.10$                               | $-0.19 \pm 0.10$                               |
|        | b    | $0.03 \pm 0.04$                          | $0.19 \pm 0.07$                              | $0.18 \pm 0.05$                               | $0.15 \pm 0.10$                                | $0.19 \pm 0.08$                                |
|        | ba   | $0.15 \pm 0.04$                          | $-0.04 \pm 0.05$                             | $-0.02 \pm 0.05$                              | $-0.02 \pm 0.07$                               | $-0.07 \pm 0.07$                               |
|        | bad  | $0.20 \pm 0.04$                          | $-0.04 \pm 0.07$                             | $-0.03 \pm 0.05$                              | $-0.01 \pm 0.09$                               | $-0.02 \pm 0.13$                               |
|        | badq | $-0.07 \pm 0.05$                         | $-0.18 \pm 0.08$                             | $-0.18 \pm 0.07$                              | $-0.04 \pm 0.13$                               | $-0.27 \pm 0.13$                               |



Table 40: MM-to-QM net ligand binding free energy correction values 2- $\lambda$  states simulated for 100 ps

| Molec. | MM'  | $\Delta G_{\text{TI3}}^{N_\lambda=11}$ | $\Delta\Delta G_{\text{TI}}^{N_\lambda=2}$ | $\Delta\Delta G_{\text{BAR}}^{N_\lambda=2}$ | $\Delta\Delta G_{\text{IEXP}}^{N_\lambda=1}$ | $\Delta\Delta G_{\text{DEXP}}^{N_\lambda=1}$ |
|--------|------|----------------------------------------|--------------------------------------------|---------------------------------------------|----------------------------------------------|----------------------------------------------|
| BNZ    |      | $0.05 \pm 0.03$                        | $-0.03 \pm 0.09$                           | $0.08 \pm 0.11$                             | $0.15 \pm 0.16$                              | $-0.00 \pm 0.16$                             |
|        | b    | $0.10 \pm 0.02$                        | $-0.23 \pm 0.08$                           | $-0.15 \pm 0.09$                            | $0.13 \pm 0.12$                              | $-0.36 \pm 0.17$                             |
|        | ba   | $0.09 \pm 0.02$                        | $-0.09 \pm 0.07$                           | $-0.07 \pm 0.08$                            | $0.04 \pm 0.13$                              | $0.26 \pm 0.35$                              |
|        | bad  | $0.14 \pm 0.02$                        | $-0.15 \pm 0.07$                           | $-0.09 \pm 0.08$                            | $-0.05 \pm 0.14$                             | $-0.15 \pm 0.13$                             |
|        | badq | $0.06 \pm 0.02$                        | $0.10 \pm 0.09$                            | $0.06 \pm 0.14$                             | $-0.08 \pm 0.21$                             | $0.05 \pm 0.18$                              |
| PXY    |      | $0.46 \pm 0.04$                        | $0.19 \pm 0.14$                            | $0.22 \pm 0.17$                             | $0.03 \pm 0.33$                              | $1.10 \pm 0.42$                              |
|        | b    | $0.43 \pm 0.04$                        | $0.02 \pm 0.13$                            | $0.07 \pm 0.18$                             | $-0.01 \pm 0.34$                             | $-0.04 \pm 0.21$                             |
|        | ba   | $0.36 \pm 0.03$                        | $0.05 \pm 0.11$                            | $-0.03 \pm 0.13$                            | $0.35 \pm 0.22$                              | $-0.15 \pm 0.33$                             |
|        | bad  | $0.46 \pm 0.04$                        | $0.15 \pm 0.11$                            | $0.07 \pm 0.14$                             | $0.22 \pm 0.24$                              | $-0.02 \pm 0.26$                             |
|        | badq | $0.38 \pm 0.06$                        | $0.01 \pm 0.21$                            | $-0.51 \pm 0.44$                            | $-0.41 \pm 0.55$                             | $-0.30 \pm 0.56$                             |
| I4B    |      | $0.06 \pm 0.04$                        | $0.03 \pm 0.17$                            | $0.09 \pm 0.19$                             | $-0.01 \pm 0.53$                             | $-0.21 \pm 0.22$                             |
|        | b    | $0.00 \pm 0.04$                        | $0.18 \pm 0.17$                            | $0.19 \pm 0.19$                             | $0.02 \pm 0.21$                              | $0.02 \pm 0.50$                              |
|        | ba   | $0.12 \pm 0.04$                        | $-0.15 \pm 0.16$                           | $-0.20 \pm 0.17$                            | $0.08 \pm 0.19$                              | $0.40 \pm 0.40$                              |
|        | bad  | $-0.01 \pm 0.04$                       | $-0.05 \pm 0.16$                           | $-0.09 \pm 0.15$                            | $0.04 \pm 0.18$                              | $0.42 \pm 0.25$                              |
|        | badq | $0.11 \pm 0.06$                        | $0.27 \pm 0.21$                            | $0.07 \pm 0.28$                             | $0.80 \pm 0.39$                              | $-1.09 \pm 0.45$                             |
| BZF    |      | $-0.69 \pm 0.07$                       | $-0.28 \pm 0.24$                           | $-0.23 \pm 0.44$                            | $0.98 \pm 0.61$                              | $-1.66 \pm 0.57$                             |
|        | b    | $-0.70 \pm 0.08$                       | $-0.53 \pm 0.26$                           | $-0.61 \pm 0.40$                            | $-0.16 \pm 0.59$                             | $-1.37 \pm 0.46$                             |
|        | ba   | $-0.46 \pm 0.05$                       | $-0.19 \pm 0.15$                           | $-0.16 \pm 0.19$                            | $-0.33 \pm 0.39$                             | $-0.31 \pm 0.28$                             |
|        | bad  | $-0.53 \pm 0.05$                       | $-0.37 \pm 0.14$                           | $-0.38 \pm 0.21$                            | $-0.16 \pm 0.30$                             | $-0.78 \pm 0.32$                             |
|        | badq | $-0.42 \pm 0.05$                       | $0.73 \pm 0.18$                            | $0.60 \pm 0.29$                             | $1.70 \pm 0.35$                              | $0.67 \pm 0.38$                              |
| DEN    |      | $-0.21 \pm 0.06$                       | $0.10 \pm 0.19$                            | $-0.05 \pm 0.27$                            | $1.00 \pm 0.47$                              | $-1.69 \pm 0.41$                             |
|        | b    | $-0.18 \pm 0.06$                       | $0.14 \pm 0.21$                            | $-0.02 \pm 0.37$                            | $-0.72 \pm 0.54$                             | $-1.90 \pm 0.66$                             |
|        | ba   | $-0.25 \pm 0.04$                       | $0.27 \pm 0.13$                            | $0.14 \pm 0.23$                             | $-0.37 \pm 0.54$                             | $0.15 \pm 0.20$                              |

*Continued on next page*

Table 40 – Continued from previous page

| Molec. | MM'  | $\Delta G_{\text{TI3}}^{N_{\lambda}=11}$ | $\Delta\Delta G_{\text{TI}}^{N_{\lambda}=2}$ | $\Delta\Delta G_{\text{BAR}}^{N_{\lambda}=2}$ | $\Delta\Delta G_{\text{IEXP}}^{N_{\lambda}=1}$ | $\Delta\Delta G_{\text{DEXP}}^{N_{\lambda}=1}$ |
|--------|------|------------------------------------------|----------------------------------------------|-----------------------------------------------|------------------------------------------------|------------------------------------------------|
|        | bad  | $-0.26 \pm 0.04$                         | $0.32 \pm 0.13$                              | $0.09 \pm 0.21$                               | $-0.28 \pm 0.55$                               | $-0.13 \pm 0.30$                               |
|        | badq | $-0.11 \pm 0.04$                         | $0.45 \pm 0.14$                              | $0.12 \pm 0.16$                               | $0.25 \pm 0.37$                                | $-0.05 \pm 0.19$                               |
| IND    |      | $0.64 \pm 0.08$                          | $0.20 \pm 0.27$                              | $-0.01 \pm 0.55$                              | $2.51 \pm 0.55$                                | $-2.96 \pm 0.52$                               |
|        | b    | $0.04 \pm 0.08$                          | $0.89 \pm 0.30$                              | $-0.03 \pm 0.60$                              | $1.31 \pm 0.51$                                | $-1.54 \pm 0.44$                               |
|        | ba   | $0.24 \pm 0.07$                          | $0.09 \pm 0.25$                              | $-0.21 \pm 0.39$                              | $1.09 \pm 0.38$                                | $-1.44 \pm 0.30$                               |
|        | bad  | $0.11 \pm 0.05$                          | $0.64 \pm 0.20$                              | $0.27 \pm 0.35$                               | $1.16 \pm 0.41$                                | $2.15 \pm 0.62$                                |
|        | badq | $-0.33 \pm 0.12$                         | $4.12 \pm 0.40$                              | $1.02 \pm 0.72$                               | $10.57 \pm 0.63$                               | $-8.24 \pm 0.58$                               |
| OXE    |      | $0.47 \pm 0.04$                          | $-0.02 \pm 0.15$                             | $-0.02 \pm 0.19$                              | $-0.05 \pm 0.30$                               | $0.46 \pm 0.34$                                |
|        | b    | $0.59 \pm 0.04$                          | $-0.29 \pm 0.14$                             | $-0.34 \pm 0.14$                              | $-0.01 \pm 0.21$                               | $-0.61 \pm 0.31$                               |
|        | ba   | $0.49 \pm 0.04$                          | $0.05 \pm 0.13$                              | $0.02 \pm 0.14$                               | $-0.40 \pm 0.25$                               | $0.05 \pm 0.26$                                |
|        | bad  | $0.64 \pm 0.04$                          | $-0.23 \pm 0.14$                             | $-0.30 \pm 0.16$                              | $-0.50 \pm 0.25$                               | $-0.05 \pm 0.20$                               |
|        | badq | $0.88 \pm 0.05$                          | $0.16 \pm 0.18$                              | $-0.11 \pm 0.20$                              | $0.47 \pm 0.45$                                | $-0.78 \pm 0.49$                               |
| N4B    |      | $0.11 \pm 0.06$                          | $-0.26 \pm 0.16$                             | $-0.11 \pm 0.21$                              | $-0.70 \pm 0.30$                               | $0.31 \pm 0.43$                                |
|        | b    | $0.03 \pm 0.04$                          | $-0.27 \pm 0.14$                             | $-0.28 \pm 0.19$                              | $-0.26 \pm 0.31$                               | $-0.20 \pm 0.20$                               |
|        | ba   | $0.15 \pm 0.04$                          | $-0.44 \pm 0.14$                             | $-0.40 \pm 0.17$                              | $-0.30 \pm 0.29$                               | $-0.46 \pm 0.30$                               |
|        | bad  | $0.20 \pm 0.04$                          | $-0.14 \pm 0.14$                             | $-0.02 \pm 0.14$                              | $-0.32 \pm 0.27$                               | $0.02 \pm 0.42$                                |
|        | badq | $-0.07 \pm 0.05$                         | $0.23 \pm 0.19$                              | $-0.24 \pm 0.28$                              | $-0.14 \pm 0.37$                               | $-1.53 \pm 0.34$                               |

Table 41: MM-to-QM net ligand binding free energy correction values 3- $\lambda$  states simulated for 100 ps

| Molec. | MM'  | $\Delta G_{\text{TI}3}^{N_\lambda=11}$ | $\Delta\Delta G_{\text{TI}}^{N_\lambda=3}$ | $\Delta\Delta G_{\text{BAR}}^{N_\lambda=3}$ | $\Delta\Delta G_{\text{IEXP}}^{N_\lambda=2}$ | $\Delta\Delta G_{\text{DEXP}}^{N_\lambda=2}$ |
|--------|------|----------------------------------------|--------------------------------------------|---------------------------------------------|----------------------------------------------|----------------------------------------------|
| BNZ    |      | $0.05 \pm 0.03$                        | $0.04 \pm 0.09$                            | $0.04 \pm 0.07$                             | $0.07 \pm 0.12$                              | $0.12 \pm 0.12$                              |
|        | b    | $0.10 \pm 0.02$                        | $-0.05 \pm 0.07$                           | $-0.07 \pm 0.07$                            | $0.04 \pm 0.10$                              | $-0.13 \pm 0.11$                             |
|        | ba   | $0.09 \pm 0.02$                        | $0.06 \pm 0.07$                            | $0.03 \pm 0.06$                             | $0.04 \pm 0.08$                              | $0.13 \pm 0.13$                              |
|        | bad  | $0.14 \pm 0.02$                        | $-0.20 \pm 0.07$                           | $-0.18 \pm 0.06$                            | $-0.15 \pm 0.09$                             | $-0.19 \pm 0.09$                             |
|        | badq | $0.06 \pm 0.02$                        | $0.06 \pm 0.08$                            | $0.06 \pm 0.08$                             | $-0.02 \pm 0.14$                             | $0.12 \pm 0.12$                              |
| PXY    |      | $0.46 \pm 0.04$                        | $0.06 \pm 0.11$                            | $0.05 \pm 0.11$                             | $-0.03 \pm 0.17$                             | $0.35 \pm 0.17$                              |
|        | b    | $0.43 \pm 0.04$                        | $-0.22 \pm 0.14$                           | $-0.16 \pm 0.12$                            | $-0.21 \pm 0.23$                             | $-0.09 \pm 0.25$                             |
|        | ba   | $0.36 \pm 0.03$                        | $-0.18 \pm 0.10$                           | $-0.15 \pm 0.10$                            | $-0.00 \pm 0.14$                             | $-0.26 \pm 0.15$                             |
|        | bad  | $0.46 \pm 0.04$                        | $0.01 \pm 0.10$                            | $0.02 \pm 0.09$                             | $0.06 \pm 0.16$                              | $-0.05 \pm 0.15$                             |
|        | badq | $0.38 \pm 0.06$                        | $-0.47 \pm 0.18$                           | $-0.50 \pm 0.29$                            | $-0.97 \pm 0.45$                             | $-0.53 \pm 0.40$                             |
| I4B    |      | $0.06 \pm 0.04$                        | $0.04 \pm 0.15$                            | $0.11 \pm 0.12$                             | $0.18 \pm 0.26$                              | $-0.39 \pm 0.21$                             |
|        | b    | $0.00 \pm 0.04$                        | $0.01 \pm 0.15$                            | $0.08 \pm 0.11$                             | $-0.09 \pm 0.17$                             | $0.13 \pm 0.26$                              |
|        | ba   | $0.12 \pm 0.04$                        | $-0.09 \pm 0.13$                           | $-0.10 \pm 0.11$                            | $-0.00 \pm 0.15$                             | $-0.04 \pm 0.20$                             |
|        | bad  | $-0.01 \pm 0.04$                       | $0.09 \pm 0.14$                            | $0.06 \pm 0.10$                             | $0.15 \pm 0.14$                              | $-0.01 \pm 0.18$                             |
|        | badq | $0.11 \pm 0.06$                        | $0.06 \pm 0.18$                            | $0.09 \pm 0.18$                             | $0.05 \pm 0.27$                              | $-0.26 \pm 0.29$                             |
| BZF    |      | $-0.69 \pm 0.07$                       | $-0.01 \pm 0.21$                           | $-0.01 \pm 0.18$                            | $0.02 \pm 0.50$                              | $-0.66 \pm 0.38$                             |
|        | b    | $-0.70 \pm 0.08$                       | $-0.08 \pm 0.22$                           | $-0.13 \pm 0.19$                            | $0.19 \pm 0.41$                              | $-0.53 \pm 0.28$                             |
|        | ba   | $-0.46 \pm 0.05$                       | $-0.20 \pm 0.13$                           | $-0.18 \pm 0.12$                            | $-0.22 \pm 0.22$                             | $-0.19 \pm 0.19$                             |
|        | bad  | $-0.53 \pm 0.05$                       | $-0.12 \pm 0.13$                           | $-0.15 \pm 0.12$                            | $-0.10 \pm 0.18$                             | $-0.28 \pm 0.17$                             |
|        | badq | $-0.42 \pm 0.05$                       | $0.23 \pm 0.16$                            | $0.24 \pm 0.14$                             | $0.23 \pm 0.35$                              | $0.53 \pm 0.27$                              |
| DEN    |      | $-0.21 \pm 0.06$                       | $-0.01 \pm 0.17$                           | $-0.03 \pm 0.15$                            | $0.46 \pm 0.32$                              | $-0.42 \pm 0.22$                             |
|        | b    | $-0.18 \pm 0.06$                       | $0.05 \pm 0.18$                            | $0.05 \pm 0.16$                             | $0.09 \pm 0.28$                              | $-0.51 \pm 0.39$                             |
|        | ba   | $-0.25 \pm 0.04$                       | $0.26 \pm 0.13$                            | $0.22 \pm 0.13$                             | $0.08 \pm 0.36$                              | $0.39 \pm 0.17$                              |

*Continued on next page*

Table 41 – *Continued from previous page*

| Molec. | MM'  | $\Delta G_{\text{TI3}}^{N_i=11}$ | $\Delta \Delta G_{\text{TI}}^{N_i=3}$ | $\Delta \Delta G_{\text{BAR}}^{N_i=3}$ | $\Delta \Delta G_{\text{IEXP}}^{N_i=2}$ | $\Delta \Delta G_{\text{DEXP}}^{N_i=2}$ |
|--------|------|----------------------------------|---------------------------------------|----------------------------------------|-----------------------------------------|-----------------------------------------|
|        | bad  | $-0.26 \pm 0.04$                 | $-0.14 \pm 0.11$                      | $-0.11 \pm 0.12$                       | $-0.07 \pm 0.35$                        | $-0.17 \pm 0.26$                        |
|        | badq | $-0.11 \pm 0.04$                 | $-0.26 \pm 0.11$                      | $-0.20 \pm 0.10$                       | $-0.46 \pm 0.29$                        | $-0.34 \pm 0.11$                        |
| IND    |      | $0.64 \pm 0.08$                  | $-0.29 \pm 0.26$                      | $-0.18 \pm 0.26$                       | $0.09 \pm 0.37$                         | $-1.03 \pm 0.57$                        |
|        | b    | $0.04 \pm 0.08$                  | $0.00 \pm 0.24$                       | $-0.04 \pm 0.26$                       | $0.42 \pm 0.48$                         | $-0.78 \pm 0.54$                        |
|        | ba   | $0.24 \pm 0.07$                  | $0.09 \pm 0.18$                       | $-0.03 \pm 0.18$                       | $0.40 \pm 0.37$                         | $-0.39 \pm 0.25$                        |
|        | bad  | $0.11 \pm 0.05$                  | $0.38 \pm 0.17$                       | $0.37 \pm 0.18$                        | $0.49 \pm 0.27$                         | $0.63 \pm 0.47$                         |
|        | badq | $-0.33 \pm 0.12$                 | $0.60 \pm 0.34$                       | $0.28 \pm 0.48$                        | $3.33 \pm 0.57$                         | $-3.10 \pm 0.42$                        |
| OXE    |      | $0.47 \pm 0.04$                  | $0.15 \pm 0.13$                       | $0.12 \pm 0.11$                        | $0.00 \pm 0.19$                         | $0.18 \pm 0.18$                         |
|        | b    | $0.59 \pm 0.04$                  | $-0.35 \pm 0.12$                      | $-0.32 \pm 0.10$                       | $-0.28 \pm 0.16$                        | $-0.55 \pm 0.16$                        |
|        | ba   | $0.49 \pm 0.04$                  | $-0.28 \pm 0.12$                      | $-0.22 \pm 0.09$                       | $-0.31 \pm 0.16$                        | $-0.24 \pm 0.14$                        |
|        | bad  | $0.64 \pm 0.04$                  | $-0.23 \pm 0.13$                      | $-0.23 \pm 0.11$                       | $-0.36 \pm 0.15$                        | $-0.20 \pm 0.18$                        |
|        | badq | $0.88 \pm 0.05$                  | $-0.13 \pm 0.15$                      | $-0.14 \pm 0.14$                       | $0.08 \pm 0.25$                         | $-0.36 \pm 0.29$                        |
| N4B    |      | $0.11 \pm 0.06$                  | $-0.14 \pm 0.13$                      | $-0.15 \pm 0.13$                       | $-0.15 \pm 0.21$                        | $0.06 \pm 0.22$                         |
|        | b    | $0.03 \pm 0.04$                  | $-0.27 \pm 0.13$                      | $-0.27 \pm 0.12$                       | $-0.51 \pm 0.23$                        | $-0.04 \pm 0.29$                        |
|        | ba   | $0.15 \pm 0.04$                  | $-0.46 \pm 0.12$                      | $-0.42 \pm 0.11$                       | $-0.40 \pm 0.18$                        | $-0.49 \pm 0.21$                        |
|        | bad  | $0.20 \pm 0.04$                  | $0.00 \pm 0.13$                       | $-0.01 \pm 0.11$                       | $-0.13 \pm 0.18$                        | $0.31 \pm 0.19$                         |
|        | badq | $-0.07 \pm 0.05$                 | $0.44 \pm 0.17$                       | $0.31 \pm 0.19$                        | $0.37 \pm 0.29$                         | $-0.02 \pm 0.34$                        |

Table 42: MM-to-QM net ligand binding free energy correction values 6- $\lambda$  states simulated for 100 ps

| Molec. | MM'  | $\Delta G_{\text{TI3}}^{N_\lambda=11}$ | $\Delta\Delta G_{\text{TI}}^{N_\lambda=6}$ | $\Delta\Delta G_{\text{BAR}}^{N_\lambda=6}$ | $\Delta\Delta G_{\text{IEXP}}^{N_\lambda=5}$ | $\Delta\Delta G_{\text{DEXP}}^{N_\lambda=5}$ |
|--------|------|----------------------------------------|--------------------------------------------|---------------------------------------------|----------------------------------------------|----------------------------------------------|
| BNZ    |      | $0.05 \pm 0.03$                        | $-0.04 \pm 0.06$                           | $-0.04 \pm 0.05$                            | $-0.07 \pm 0.07$                             | $0.00 \pm 0.07$                              |
|        | b    | $0.10 \pm 0.02$                        | $-0.09 \pm 0.05$                           | $-0.10 \pm 0.04$                            | $-0.09 \pm 0.06$                             | $-0.10 \pm 0.06$                             |
|        | ba   | $0.09 \pm 0.02$                        | $-0.02 \pm 0.04$                           | $-0.02 \pm 0.04$                            | $-0.03 \pm 0.05$                             | $-0.02 \pm 0.05$                             |
|        | bad  | $0.14 \pm 0.02$                        | $-0.06 \pm 0.04$                           | $-0.06 \pm 0.04$                            | $-0.06 \pm 0.05$                             | $-0.05 \pm 0.06$                             |
|        | badq | $0.06 \pm 0.02$                        | $0.07 \pm 0.05$                            | $0.07 \pm 0.05$                             | $0.06 \pm 0.08$                              | $0.08 \pm 0.07$                              |
| PXY    |      | $0.46 \pm 0.04$                        | $0.06 \pm 0.08$                            | $0.05 \pm 0.06$                             | $0.03 \pm 0.09$                              | $0.11 \pm 0.09$                              |
|        | b    | $0.43 \pm 0.04$                        | $-0.20 \pm 0.08$                           | $-0.18 \pm 0.07$                            | $-0.17 \pm 0.10$                             | $-0.19 \pm 0.09$                             |
|        | ba   | $0.36 \pm 0.03$                        | $0.04 \pm 0.07$                            | $0.03 \pm 0.05$                             | $0.08 \pm 0.07$                              | $-0.02 \pm 0.07$                             |
|        | bad  | $0.46 \pm 0.04$                        | $0.05 \pm 0.07$                            | $0.05 \pm 0.05$                             | $0.07 \pm 0.08$                              | $0.05 \pm 0.09$                              |
|        | badq | $0.38 \pm 0.06$                        | $0.12 \pm 0.12$                            | $0.12 \pm 0.14$                             | $-0.01 \pm 0.25$                             | $0.16 \pm 0.23$                              |
| I4B    |      | $0.06 \pm 0.04$                        | $-0.10 \pm 0.10$                           | $-0.09 \pm 0.07$                            | $-0.02 \pm 0.12$                             | $-0.23 \pm 0.11$                             |
|        | b    | $0.00 \pm 0.04$                        | $0.17 \pm 0.09$                            | $0.17 \pm 0.07$                             | $0.15 \pm 0.11$                              | $0.16 \pm 0.11$                              |
|        | ba   | $0.12 \pm 0.04$                        | $-0.14 \pm 0.09$                           | $-0.12 \pm 0.08$                            | $-0.09 \pm 0.11$                             | $-0.19 \pm 0.12$                             |
|        | bad  | $-0.01 \pm 0.04$                       | $-0.09 \pm 0.08$                           | $-0.07 \pm 0.07$                            | $-0.07 \pm 0.10$                             | $-0.05 \pm 0.10$                             |
|        | badq | $0.11 \pm 0.06$                        | $-0.03 \pm 0.11$                           | $-0.01 \pm 0.10$                            | $0.01 \pm 0.16$                              | $-0.06 \pm 0.16$                             |
| BZF    |      | $-0.69 \pm 0.07$                       | $0.00 \pm 0.13$                            | $0.00 \pm 0.11$                             | $0.02 \pm 0.16$                              | $-0.11 \pm 0.18$                             |
|        | b    | $-0.70 \pm 0.08$                       | $-0.18 \pm 0.15$                           | $-0.17 \pm 0.12$                            | $-0.25 \pm 0.21$                             | $-0.16 \pm 0.20$                             |
|        | ba   | $-0.46 \pm 0.05$                       | $-0.09 \pm 0.09$                           | $-0.10 \pm 0.08$                            | $-0.16 \pm 0.12$                             | $-0.07 \pm 0.10$                             |
|        | bad  | $-0.53 \pm 0.05$                       | $0.07 \pm 0.09$                            | $0.04 \pm 0.07$                             | $0.12 \pm 0.10$                              | $-0.02 \pm 0.10$                             |
|        | badq | $-0.42 \pm 0.05$                       | $0.01 \pm 0.11$                            | $0.01 \pm 0.08$                             | $0.10 \pm 0.13$                              | $-0.02 \pm 0.13$                             |
| DEN    |      | $-0.21 \pm 0.06$                       | $-0.03 \pm 0.12$                           | $-0.03 \pm 0.09$                            | $0.06 \pm 0.15$                              | $-0.09 \pm 0.15$                             |
|        | b    | $-0.18 \pm 0.06$                       | $-0.13 \pm 0.11$                           | $-0.10 \pm 0.11$                            | $-0.05 \pm 0.16$                             | $-0.24 \pm 0.15$                             |
|        | ba   | $-0.25 \pm 0.04$                       | $0.09 \pm 0.08$                            | $0.09 \pm 0.10$                             | $0.06 \pm 0.17$                              | $0.16 \pm 0.18$                              |

*Continued on next page*

Table 42 – Continued from previous page

| Molec. | MM'  | $\Delta G_{\text{TI3}}^{N_\lambda=11}$ | $\Delta\Delta G_{\text{TI}}^{N_\lambda=6}$ | $\Delta\Delta G_{\text{BAR}}^{N_\lambda=6}$ | $\Delta\Delta G_{\text{IEXP}}^{N_\lambda=5}$ | $\Delta\Delta G_{\text{DEXP}}^{N_\lambda=5}$ |
|--------|------|----------------------------------------|--------------------------------------------|---------------------------------------------|----------------------------------------------|----------------------------------------------|
|        | bad  | $-0.26 \pm 0.04$                       | $-0.05 \pm 0.07$                           | $-0.03 \pm 0.07$                            | $-0.02 \pm 0.13$                             | $-0.05 \pm 0.10$                             |
|        | badq | $-0.11 \pm 0.04$                       | $-0.08 \pm 0.07$                           | $-0.07 \pm 0.06$                            | $-0.06 \pm 0.10$                             | $-0.10 \pm 0.08$                             |
| IND    |      | $0.64 \pm 0.08$                        | $-0.10 \pm 0.16$                           | $-0.08 \pm 0.14$                            | $-0.06 \pm 0.29$                             | $-0.23 \pm 0.25$                             |
|        | b    | $0.04 \pm 0.08$                        | $0.21 \pm 0.17$                            | $0.22 \pm 0.13$                             | $0.17 \pm 0.23$                              | $0.00 \pm 0.20$                              |
|        | ba   | $0.24 \pm 0.07$                        | $-0.19 \pm 0.13$                           | $-0.19 \pm 0.11$                            | $-0.15 \pm 0.19$                             | $-0.29 \pm 0.16$                             |
|        | bad  | $0.11 \pm 0.05$                        | $0.14 \pm 0.11$                            | $0.15 \pm 0.10$                             | $0.22 \pm 0.16$                              | $0.10 \pm 0.13$                              |
|        | badq | $-0.33 \pm 0.12$                       | $-0.20 \pm 0.23$                           | $-0.12 \pm 0.23$                            | $0.43 \pm 0.38$                              | $-0.90 \pm 0.35$                             |
| OXE    |      | $0.47 \pm 0.04$                        | $0.00 \pm 0.09$                            | $-0.02 \pm 0.07$                            | $-0.04 \pm 0.10$                             | $0.02 \pm 0.11$                              |
|        | b    | $0.59 \pm 0.04$                        | $-0.10 \pm 0.07$                           | $-0.12 \pm 0.06$                            | $-0.09 \pm 0.08$                             | $-0.14 \pm 0.08$                             |
|        | ba   | $0.49 \pm 0.04$                        | $-0.01 \pm 0.08$                           | $-0.01 \pm 0.07$                            | $-0.05 \pm 0.10$                             | $0.04 \pm 0.11$                              |
|        | bad  | $0.64 \pm 0.04$                        | $-0.16 \pm 0.08$                           | $-0.18 \pm 0.07$                            | $-0.18 \pm 0.09$                             | $-0.17 \pm 0.10$                             |
|        | badq | $0.88 \pm 0.05$                        | $-0.20 \pm 0.10$                           | $-0.21 \pm 0.09$                            | $-0.11 \pm 0.14$                             | $-0.33 \pm 0.14$                             |
| N4B    |      | $0.11 \pm 0.06$                        | $-0.16 \pm 0.09$                           | $-0.15 \pm 0.08$                            | $-0.18 \pm 0.12$                             | $-0.10 \pm 0.12$                             |
|        | b    | $0.03 \pm 0.04$                        | $0.07 \pm 0.09$                            | $0.05 \pm 0.07$                             | $0.07 \pm 0.11$                              | $0.03 \pm 0.12$                              |
|        | ba   | $0.15 \pm 0.04$                        | $-0.25 \pm 0.08$                           | $-0.24 \pm 0.07$                            | $-0.25 \pm 0.10$                             | $-0.20 \pm 0.10$                             |
|        | bad  | $0.20 \pm 0.04$                        | $0.25 \pm 0.09$                            | $0.23 \pm 0.07$                             | $0.14 \pm 0.11$                              | $0.35 \pm 0.18$                              |
|        | badq | $-0.07 \pm 0.05$                       | $-0.04 \pm 0.10$                           | $-0.05 \pm 0.09$                            | $-0.01 \pm 0.13$                             | $-0.21 \pm 0.12$                             |

Table 43: MM-to-QM net ligand binding free energy correction values 2- $\lambda$  states simulated for 50 ps

| Molec. | MM'  | $\Delta G_{\text{TI3}}^{N_\lambda=11}$ | $\Delta\Delta G_{\text{TI}}^{N_\lambda=2}$ | $\Delta\Delta G_{\text{BAR}}^{N_\lambda=2}$ | $\Delta\Delta G_{\text{IEXP}}^{N_\lambda=1}$ | $\Delta\Delta G_{\text{DEXP}}^{N_\lambda=1}$ |
|--------|------|----------------------------------------|--------------------------------------------|---------------------------------------------|----------------------------------------------|----------------------------------------------|
| BNZ    |      | $0.05 \pm 0.03$                        | $0.14 \pm 0.16$                            | $0.19 \pm 0.16$                             | $0.37 \pm 0.40$                              | $0.29 \pm 0.28$                              |
|        | b    | $0.10 \pm 0.02$                        | $-0.29 \pm 0.12$                           | $-0.24 \pm 0.13$                            | $0.33 \pm 0.21$                              | $-0.57 \pm 0.19$                             |
|        | ba   | $0.09 \pm 0.02$                        | $-0.08 \pm 0.09$                           | $-0.08 \pm 0.13$                            | $0.23 \pm 0.19$                              | $-0.33 \pm 0.22$                             |
|        | bad  | $0.14 \pm 0.02$                        | $-0.17 \pm 0.11$                           | $-0.12 \pm 0.11$                            | $0.15 \pm 0.16$                              | $-0.16 \pm 0.19$                             |
|        | badq | $0.06 \pm 0.02$                        | $0.11 \pm 0.10$                            | $0.08 \pm 0.13$                             | $0.43 \pm 0.20$                              | $-0.37 \pm 0.16$                             |
| PXY    |      | $0.46 \pm 0.04$                        | $-0.09 \pm 0.20$                           | $0.03 \pm 0.23$                             | $-0.34 \pm 0.41$                             | $1.25 \pm 0.48$                              |
|        | b    | $0.43 \pm 0.04$                        | $-0.21 \pm 0.22$                           | $-0.30 \pm 0.25$                            | $0.12 \pm 0.49$                              | $-0.92 \pm 0.32$                             |
|        | ba   | $0.36 \pm 0.03$                        | $-0.30 \pm 0.16$                           | $-0.24 \pm 0.15$                            | $-0.48 \pm 0.33$                             | $-0.29 \pm 0.20$                             |
|        | bad  | $0.46 \pm 0.04$                        | $-0.54 \pm 0.16$                           | $-0.45 \pm 0.16$                            | $-0.58 \pm 0.34$                             | $-0.43 \pm 0.19$                             |
|        | badq | $0.38 \pm 0.06$                        | $0.05 \pm 0.29$                            | $0.01 \pm 0.52$                             | $1.32 \pm 0.51$                              | $-1.13 \pm 0.45$                             |
| I4B    |      | $0.06 \pm 0.04$                        | $0.29 \pm 0.25$                            | $0.28 \pm 0.25$                             | $-0.02 \pm 0.41$                             | $-0.77 \pm 0.40$                             |
|        | b    | $0.00 \pm 0.04$                        | $0.19 \pm 0.23$                            | $0.27 \pm 0.29$                             | $0.59 \pm 0.41$                              | $-1.31 \pm 0.62$                             |
|        | ba   | $0.12 \pm 0.04$                        | $0.29 \pm 0.20$                            | $0.44 \pm 0.21$                             | $0.37 \pm 0.39$                              | $0.19 \pm 0.24$                              |
|        | bad  | $-0.01 \pm 0.04$                       | $0.21 \pm 0.19$                            | $0.23 \pm 0.24$                             | $0.30 \pm 0.35$                              | $-0.19 \pm 0.30$                             |
|        | badq | $0.11 \pm 0.06$                        | $0.11 \pm 0.26$                            | $-0.52 \pm 0.53$                            | $0.81 \pm 0.52$                              | $-2.36 \pm 0.50$                             |
| BZF    |      | $-0.69 \pm 0.07$                       | $-0.26 \pm 0.39$                           | $-0.51 \pm 0.55$                            | $-0.93 \pm 0.69$                             | $-0.75 \pm 0.66$                             |
|        | b    | $-0.70 \pm 0.08$                       | $0.09 \pm 0.41$                            | $0.24 \pm 0.54$                             | $0.09 \pm 0.62$                              | $0.30 \pm 0.46$                              |
|        | ba   | $-0.46 \pm 0.05$                       | $0.07 \pm 0.20$                            | $-0.03 \pm 0.26$                            | $0.81 \pm 0.30$                              | $-0.67 \pm 0.40$                             |
|        | bad  | $-0.53 \pm 0.05$                       | $0.18 \pm 0.22$                            | $0.20 \pm 0.23$                             | $0.99 \pm 0.27$                              | $-0.64 \pm 0.28$                             |
|        | badq | $-0.42 \pm 0.05$                       | $0.65 \pm 0.32$                            | $0.18 \pm 0.41$                             | $1.29 \pm 0.39$                              | $-0.91 \pm 0.42$                             |
| DEN    |      | $-0.21 \pm 0.06$                       | $-0.26 \pm 0.29$                           | $-0.12 \pm 0.43$                            | $0.44 \pm 0.43$                              | $0.36 \pm 0.35$                              |
|        | b    | $-0.18 \pm 0.06$                       | $-0.57 \pm 0.30$                           | $-0.35 \pm 0.38$                            | $0.66 \pm 0.37$                              | $-1.41 \pm 0.50$                             |
|        | ba   | $-0.25 \pm 0.04$                       | $0.17 \pm 0.18$                            | $0.22 \pm 0.22$                             | $0.44 \pm 0.41$                              | $-0.10 \pm 0.28$                             |

*Continued on next page*

Table 43 – Continued from previous page

| Molec. | MM'  | $\Delta G_{\text{TI3}}^{N_{\lambda}=11}$ | $\Delta\Delta G_{\text{TI}}^{N_{\lambda}=2}$ | $\Delta\Delta G_{\text{BAR}}^{N_{\lambda}=2}$ | $\Delta\Delta G_{\text{IEXP}}^{N_{\lambda}=1}$ | $\Delta\Delta G_{\text{DEXP}}^{N_{\lambda}=1}$ |
|--------|------|------------------------------------------|----------------------------------------------|-----------------------------------------------|------------------------------------------------|------------------------------------------------|
|        | bad  | $-0.26 \pm 0.04$                         | $-0.04 \pm 0.17$                             | $-0.09 \pm 0.26$                              | $0.56 \pm 0.41$                                | $-0.71 \pm 0.30$                               |
|        | badq | $-0.11 \pm 0.04$                         | $0.33 \pm 0.18$                              | $0.11 \pm 0.20$                               | $0.02 \pm 0.29$                                | $0.03 \pm 0.28$                                |
| IND    |      | $0.64 \pm 0.08$                          | $-0.37 \pm 0.40$                             | $-0.88 \pm 0.55$                              | $1.01 \pm 0.37$                                | $-3.21 \pm 0.57$                               |
|        | b    | $0.04 \pm 0.08$                          | $0.75 \pm 0.42$                              | $-0.05 \pm 0.62$                              | $3.31 \pm 0.70$                                | $-2.88 \pm 0.41$                               |
|        | ba   | $0.24 \pm 0.07$                          | $1.05 \pm 0.44$                              | $-0.08 \pm 0.43$                              | $0.35 \pm 0.60$                                | $-1.49 \pm 0.46$                               |
|        | bad  | $0.11 \pm 0.05$                          | $0.60 \pm 0.34$                              | $0.36 \pm 0.35$                               | $0.42 \pm 0.50$                                | $2.04 \pm 0.39$                                |
|        | badq | $-0.33 \pm 0.12$                         | $3.28 \pm 0.59$                              | $1.60 \pm 0.92$                               | $10.20 \pm 0.67$                               | $-7.01 \pm 0.64$                               |
| OXE    |      | $0.47 \pm 0.04$                          | $0.27 \pm 0.22$                              | $0.25 \pm 0.25$                               | $1.31 \pm 0.53$                                | $-0.57 \pm 0.58$                               |
|        | b    | $0.59 \pm 0.04$                          | $0.31 \pm 0.20$                              | $0.25 \pm 0.26$                               | $-0.24 \pm 0.56$                               | $-0.06 \pm 0.23$                               |
|        | ba   | $0.49 \pm 0.04$                          | $0.19 \pm 0.19$                              | $0.14 \pm 0.23$                               | $0.23 \pm 0.28$                                | $-0.20 \pm 0.28$                               |
|        | bad  | $0.64 \pm 0.04$                          | $0.22 \pm 0.18$                              | $-0.02 \pm 0.21$                              | $0.11 \pm 0.46$                                | $-0.69 \pm 0.26$                               |
|        | badq | $0.88 \pm 0.05$                          | $0.87 \pm 0.28$                              | $0.15 \pm 0.49$                               | $0.84 \pm 0.66$                                | $-0.87 \pm 0.53$                               |
| N4B    |      | $0.11 \pm 0.06$                          | $-0.73 \pm 0.28$                             | $-0.77 \pm 0.40$                              | $-1.33 \pm 0.58$                               | $0.83 \pm 0.54$                                |
|        | b    | $0.03 \pm 0.04$                          | $-0.70 \pm 0.27$                             | $-0.46 \pm 0.35$                              | $-1.26 \pm 0.54$                               | $0.87 \pm 0.39$                                |
|        | ba   | $0.15 \pm 0.04$                          | $-1.24 \pm 0.24$                             | $-1.12 \pm 0.30$                              | $-0.72 \pm 0.38$                               | $-1.22 \pm 0.37$                               |
|        | bad  | $0.20 \pm 0.04$                          | $-0.55 \pm 0.23$                             | $-0.58 \pm 0.28$                              | $-0.68 \pm 0.29$                               | $0.56 \pm 0.59$                                |
|        | badq | $-0.07 \pm 0.05$                         | $-0.18 \pm 0.31$                             | $0.04 \pm 0.46$                               | $1.58 \pm 0.33$                                | $-1.98 \pm 0.62$                               |



Table 44: MM-to-QM net ligand binding free energy correction values 3- $\lambda$  states simulated for 50 ps

| Molec. | MM'  | $\Delta G_{\text{TI}3}^{N_\lambda=11}$ | $\Delta\Delta G_{\text{TI}}^{N_\lambda=3}$ | $\Delta\Delta G_{\text{BAR}}^{N_\lambda=3}$ | $\Delta\Delta G_{\text{IEXP}}^{N_\lambda=2}$ | $\Delta\Delta G_{\text{DEXP}}^{N_\lambda=2}$ |
|--------|------|----------------------------------------|--------------------------------------------|---------------------------------------------|----------------------------------------------|----------------------------------------------|
| BNZ    |      | $0.05 \pm 0.03$                        | $0.05 \pm 0.14$                            | $0.08 \pm 0.11$                             | $0.10 \pm 0.17$                              | $0.11 \pm 0.18$                              |
|        | b    | $0.10 \pm 0.02$                        | $0.04 \pm 0.12$                            | $0.00 \pm 0.10$                             | $0.03 \pm 0.21$                              | $-0.13 \pm 0.14$                             |
|        | ba   | $0.09 \pm 0.02$                        | $-0.03 \pm 0.11$                           | $-0.05 \pm 0.10$                            | $0.02 \pm 0.13$                              | $-0.07 \pm 0.16$                             |
|        | bad  | $0.14 \pm 0.02$                        | $-0.10 \pm 0.09$                           | $-0.10 \pm 0.07$                            | $0.07 \pm 0.10$                              | $-0.23 \pm 0.11$                             |
|        | badq | $0.06 \pm 0.02$                        | $-0.02 \pm 0.11$                           | $-0.01 \pm 0.11$                            | $0.14 \pm 0.15$                              | $-0.15 \pm 0.17$                             |
| PXY    |      | $0.46 \pm 0.04$                        | $0.15 \pm 0.21$                            | $0.08 \pm 0.20$                             | $-0.14 \pm 0.30$                             | $0.66 \pm 0.39$                              |
|        | b    | $0.43 \pm 0.04$                        | $-0.28 \pm 0.18$                           | $-0.32 \pm 0.18$                            | $-0.15 \pm 0.28$                             | $-0.36 \pm 0.29$                             |
|        | ba   | $0.36 \pm 0.03$                        | $-0.06 \pm 0.16$                           | $-0.10 \pm 0.11$                            | $-0.25 \pm 0.25$                             | $0.05 \pm 0.17$                              |
|        | bad  | $0.46 \pm 0.04$                        | $0.01 \pm 0.16$                            | $-0.09 \pm 0.12$                            | $0.10 \pm 0.33$                              | $-0.07 \pm 0.20$                             |
|        | badq | $0.38 \pm 0.06$                        | $0.08 \pm 0.28$                            | $-0.07 \pm 0.26$                            | $0.37 \pm 0.39$                              | $0.18 \pm 0.42$                              |
| I4B    |      | $0.06 \pm 0.04$                        | $0.06 \pm 0.26$                            | $0.15 \pm 0.17$                             | $-0.04 \pm 0.27$                             | $-0.01 \pm 0.30$                             |
|        | b    | $0.00 \pm 0.04$                        | $0.18 \pm 0.23$                            | $0.21 \pm 0.18$                             | $0.45 \pm 0.28$                              | $-0.28 \pm 0.37$                             |
|        | ba   | $0.12 \pm 0.04$                        | $-0.13 \pm 0.18$                           | $-0.02 \pm 0.15$                            | $0.06 \pm 0.32$                              | $-0.16 \pm 0.19$                             |
|        | bad  | $-0.01 \pm 0.04$                       | $-0.07 \pm 0.18$                           | $0.01 \pm 0.17$                             | $-0.02 \pm 0.25$                             | $-0.15 \pm 0.22$                             |
|        | badq | $0.11 \pm 0.06$                        | $-0.40 \pm 0.24$                           | $-0.37 \pm 0.24$                            | $0.30 \pm 0.35$                              | $-1.04 \pm 0.47$                             |
| BZF    |      | $-0.69 \pm 0.07$                       | $0.26 \pm 0.32$                            | $0.09 \pm 0.26$                             | $-0.34 \pm 0.53$                             | $0.53 \pm 0.41$                              |
|        | b    | $-0.70 \pm 0.08$                       | $-0.44 \pm 0.33$                           | $-0.25 \pm 0.28$                            | $-0.89 \pm 0.49$                             | $-0.10 \pm 0.39$                             |
|        | ba   | $-0.46 \pm 0.05$                       | $-0.03 \pm 0.20$                           | $-0.03 \pm 0.17$                            | $0.16 \pm 0.22$                              | $-0.27 \pm 0.27$                             |
|        | bad  | $-0.53 \pm 0.05$                       | $0.19 \pm 0.18$                            | $0.22 \pm 0.15$                             | $0.52 \pm 0.21$                              | $-0.08 \pm 0.21$                             |
|        | badq | $-0.42 \pm 0.05$                       | $0.48 \pm 0.22$                            | $0.35 \pm 0.23$                             | $0.78 \pm 0.28$                              | $0.00 \pm 0.36$                              |
| DEN    |      | $-0.21 \pm 0.06$                       | $-0.62 \pm 0.30$                           | $-0.55 \pm 0.26$                            | $-0.66 \pm 0.36$                             | $-0.12 \pm 0.30$                             |
|        | b    | $-0.18 \pm 0.06$                       | $-0.07 \pm 0.28$                           | $-0.15 \pm 0.23$                            | $-0.10 \pm 0.40$                             | $-0.03 \pm 0.45$                             |
|        | ba   | $-0.25 \pm 0.04$                       | $0.18 \pm 0.19$                            | $0.18 \pm 0.15$                             | $0.20 \pm 0.23$                              | $0.25 \pm 0.19$                              |

*Continued on next page*

Table 44 – Continued from previous page

| Molec. | MM'  | $\Delta G_{\text{TI3}}^{N_i=11}$ | $\Delta\Delta G_{\text{TI}}^{N_i=3}$ | $\Delta\Delta G_{\text{BAR}}^{N_i=3}$ | $\Delta\Delta G_{\text{IEXP}}^{N_i=2}$ | $\Delta\Delta G_{\text{DEXP}}^{N_i=2}$ |
|--------|------|----------------------------------|--------------------------------------|---------------------------------------|----------------------------------------|----------------------------------------|
|        | bad  | $-0.26 \pm 0.04$                 | $-0.17 \pm 0.15$                     | $-0.18 \pm 0.15$                      | $0.04 \pm 0.22$                        | $-0.24 \pm 0.19$                       |
|        | badq | $-0.11 \pm 0.04$                 | $-0.16 \pm 0.20$                     | $-0.16 \pm 0.14$                      | $-0.36 \pm 0.20$                       | $1.20 \pm 0.54$                        |
| IND    |      | $0.64 \pm 0.08$                  | $0.01 \pm 0.35$                      | $-0.15 \pm 0.31$                      | $0.10 \pm 0.40$                        | $-1.32 \pm 0.43$                       |
|        | b    | $0.04 \pm 0.08$                  | $-0.30 \pm 0.35$                     | $-0.28 \pm 0.31$                      | $0.38 \pm 0.60$                        | $-1.41 \pm 0.35$                       |
|        | ba   | $0.24 \pm 0.07$                  | $-0.09 \pm 0.29$                     | $-0.18 \pm 0.23$                      | $0.26 \pm 0.38$                        | $-0.85 \pm 0.40$                       |
|        | bad  | $0.11 \pm 0.05$                  | $0.12 \pm 0.26$                      | $0.12 \pm 0.23$                       | $0.13 \pm 0.37$                        | $1.01 \pm 0.32$                        |
|        | badq | $-0.33 \pm 0.12$                 | $0.80 \pm 0.48$                      | $-0.05 \pm 0.82$                      | $3.39 \pm 0.79$                        | $-3.23 \pm 0.52$                       |
| OXE    |      | $0.47 \pm 0.04$                  | $-0.08 \pm 0.19$                     | $-0.02 \pm 0.17$                      | $0.00 \pm 0.28$                        | $-0.06 \pm 0.28$                       |
|        | b    | $0.59 \pm 0.04$                  | $-0.25 \pm 0.19$                     | $-0.14 \pm 0.17$                      | $-0.25 \pm 0.37$                       | $-0.26 \pm 0.22$                       |
|        | ba   | $0.49 \pm 0.04$                  | $0.17 \pm 0.19$                      | $0.15 \pm 0.15$                       | $0.12 \pm 0.21$                        | $0.18 \pm 0.21$                        |
|        | bad  | $0.64 \pm 0.04$                  | $-0.05 \pm 0.19$                     | $-0.05 \pm 0.14$                      | $-0.06 \pm 0.23$                       | $-0.17 \pm 0.18$                       |
|        | badq | $0.88 \pm 0.05$                  | $0.01 \pm 0.24$                      | $0.06 \pm 0.23$                       | $0.10 \pm 0.43$                        | $-0.57 \pm 0.33$                       |
| N4B    |      | $0.11 \pm 0.06$                  | $-0.88 \pm 0.23$                     | $-0.86 \pm 0.19$                      | $-0.89 \pm 0.45$                       | $-0.32 \pm 0.39$                       |
|        | b    | $0.03 \pm 0.04$                  | $-0.31 \pm 0.24$                     | $-0.35 \pm 0.19$                      | $-0.97 \pm 0.34$                       | $0.45 \pm 0.31$                        |
|        | ba   | $0.15 \pm 0.04$                  | $-0.75 \pm 0.18$                     | $-0.79 \pm 0.15$                      | $-0.69 \pm 0.23$                       | $-0.78 \pm 0.25$                       |
|        | bad  | $0.20 \pm 0.04$                  | $-0.35 \pm 0.18$                     | $-0.35 \pm 0.16$                      | $-0.45 \pm 0.24$                       | $-0.17 \pm 0.30$                       |
|        | badq | $-0.07 \pm 0.05$                 | $0.12 \pm 0.24$                      | $0.08 \pm 0.26$                       | $0.37 \pm 0.39$                        | $-0.51 \pm 0.39$                       |

Table 45: MM-to-QM net ligand binding free energy correction values 6- $\lambda$  states simulated for 50 ps

| Molec. | MM'  | $\Delta G_{\text{TI3}}^{N_\lambda=11}$ | $\Delta\Delta G_{\text{TI}}^{N_\lambda=6}$ | $\Delta\Delta G_{\text{BAR}}^{N_\lambda=6}$ | $\Delta\Delta G_{\text{IEXP}}^{N_\lambda=5}$ | $\Delta\Delta G_{\text{DEXP}}^{N_\lambda=5}$ |
|--------|------|----------------------------------------|--------------------------------------------|---------------------------------------------|----------------------------------------------|----------------------------------------------|
| BNZ    |      | $0.05 \pm 0.03$                        | $0.04 \pm 0.09$                            | $0.04 \pm 0.08$                             | $0.03 \pm 0.11$                              | $0.06 \pm 0.10$                              |
|        | b    | $0.10 \pm 0.02$                        | $0.01 \pm 0.08$                            | $-0.01 \pm 0.07$                            | $0.04 \pm 0.10$                              | $-0.06 \pm 0.09$                             |
|        | ba   | $0.09 \pm 0.02$                        | $0.02 \pm 0.07$                            | $0.02 \pm 0.06$                             | $0.06 \pm 0.09$                              | $0.01 \pm 0.08$                              |
|        | bad  | $0.14 \pm 0.02$                        | $-0.12 \pm 0.06$                           | $-0.12 \pm 0.05$                            | $-0.06 \pm 0.07$                             | $-0.17 \pm 0.08$                             |
|        | badq | $0.06 \pm 0.02$                        | $0.13 \pm 0.08$                            | $0.14 \pm 0.08$                             | $0.18 \pm 0.10$                              | $0.09 \pm 0.10$                              |
| PXY    |      | $0.46 \pm 0.04$                        | $0.03 \pm 0.12$                            | $0.04 \pm 0.09$                             | $0.01 \pm 0.13$                              | $0.10 \pm 0.15$                              |
|        | b    | $0.43 \pm 0.04$                        | $0.13 \pm 0.12$                            | $0.08 \pm 0.09$                             | $0.09 \pm 0.16$                              | $0.07 \pm 0.14$                              |
|        | ba   | $0.36 \pm 0.03$                        | $0.03 \pm 0.10$                            | $0.02 \pm 0.07$                             | $-0.05 \pm 0.12$                             | $0.09 \pm 0.12$                              |
|        | bad  | $0.46 \pm 0.04$                        | $-0.16 \pm 0.10$                           | $-0.19 \pm 0.07$                            | $-0.19 \pm 0.11$                             | $-0.15 \pm 0.11$                             |
|        | badq | $0.38 \pm 0.06$                        | $0.23 \pm 0.16$                            | $0.18 \pm 0.14$                             | $0.27 \pm 0.19$                              | $0.14 \pm 0.21$                              |
| I4B    |      | $0.06 \pm 0.04$                        | $-0.10 \pm 0.14$                           | $-0.09 \pm 0.10$                            | $0.00 \pm 0.14$                              | $-0.21 \pm 0.16$                             |
|        | b    | $0.00 \pm 0.04$                        | $0.27 \pm 0.14$                            | $0.27 \pm 0.11$                             | $0.30 \pm 0.17$                              | $0.16 \pm 0.18$                              |
|        | ba   | $0.12 \pm 0.04$                        | $0.00 \pm 0.12$                            | $0.01 \pm 0.09$                             | $0.08 \pm 0.13$                              | $-0.09 \pm 0.14$                             |
|        | bad  | $-0.01 \pm 0.04$                       | $-0.14 \pm 0.12$                           | $-0.13 \pm 0.09$                            | $-0.09 \pm 0.14$                             | $-0.18 \pm 0.15$                             |
|        | badq | $0.11 \pm 0.06$                        | $-0.18 \pm 0.17$                           | $-0.18 \pm 0.14$                            | $0.01 \pm 0.19$                              | $-0.38 \pm 0.23$                             |
| BZF    |      | $-0.69 \pm 0.07$                       | $0.08 \pm 0.19$                            | $0.05 \pm 0.16$                             | $-0.10 \pm 0.26$                             | $0.27 \pm 0.22$                              |
|        | b    | $-0.70 \pm 0.08$                       | $-0.20 \pm 0.20$                           | $-0.16 \pm 0.16$                            | $-0.22 \pm 0.25$                             | $-0.10 \pm 0.24$                             |
|        | ba   | $-0.46 \pm 0.05$                       | $-0.06 \pm 0.12$                           | $-0.03 \pm 0.10$                            | $0.03 \pm 0.17$                              | $-0.12 \pm 0.14$                             |
|        | bad  | $-0.53 \pm 0.05$                       | $0.07 \pm 0.13$                            | $0.10 \pm 0.11$                             | $0.12 \pm 0.18$                              | $0.10 \pm 0.18$                              |
|        | badq | $-0.42 \pm 0.05$                       | $0.23 \pm 0.15$                            | $0.22 \pm 0.14$                             | $0.28 \pm 0.18$                              | $0.12 \pm 0.20$                              |
| DEN    |      | $-0.21 \pm 0.06$                       | $-0.13 \pm 0.19$                           | $-0.17 \pm 0.14$                            | $-0.19 \pm 0.21$                             | $0.20 \pm 0.20$                              |
|        | b    | $-0.18 \pm 0.06$                       | $-0.05 \pm 0.17$                           | $-0.05 \pm 0.14$                            | $-0.02 \pm 0.20$                             | $-0.17 \pm 0.21$                             |
|        | ba   | $-0.25 \pm 0.04$                       | $0.35 \pm 0.11$                            | $0.34 \pm 0.08$                             | $0.32 \pm 0.13$                              | $0.35 \pm 0.12$                              |

*Continued on next page*

Table 45 – Continued from previous page

| Molec. | MM'  | $\Delta G_{\text{TI3}}^{N_{\lambda}=11}$ | $\Delta\Delta G_{\text{TI}}^{N_{\lambda}=6}$ | $\Delta\Delta G_{\text{BAR}}^{N_{\lambda}=6}$ | $\Delta\Delta G_{\text{IEXP}}^{N_{\lambda}=5}$ | $\Delta\Delta G_{\text{DEXP}}^{N_{\lambda}=5}$ |
|--------|------|------------------------------------------|----------------------------------------------|-----------------------------------------------|------------------------------------------------|------------------------------------------------|
|        | bad  | $-0.26 \pm 0.04$                         | $0.41 \pm 0.11$                              | $0.39 \pm 0.10$                               | $0.43 \pm 0.15$                                | $0.36 \pm 0.13$                                |
|        | badq | $-0.11 \pm 0.04$                         | $-0.19 \pm 0.10$                             | $-0.17 \pm 0.09$                              | $-0.22 \pm 0.13$                               | $-0.18 \pm 0.12$                               |
| IND    |      | $0.64 \pm 0.08$                          | $-0.02 \pm 0.24$                             | $-0.03 \pm 0.19$                              | $-0.11 \pm 0.28$                               | $-0.30 \pm 0.28$                               |
|        | b    | $0.04 \pm 0.08$                          | $0.69 \pm 0.23$                              | $0.65 \pm 0.18$                               | $0.87 \pm 0.28$                                | $0.18 \pm 0.24$                                |
|        | ba   | $0.24 \pm 0.07$                          | $-0.17 \pm 0.19$                             | $-0.22 \pm 0.14$                              | $-0.28 \pm 0.27$                               | $-0.20 \pm 0.22$                               |
|        | bad  | $0.11 \pm 0.05$                          | $0.09 \pm 0.17$                              | $0.11 \pm 0.13$                               | $0.10 \pm 0.22$                                | $0.22 \pm 0.18$                                |
|        | badq | $-0.33 \pm 0.12$                         | $-0.19 \pm 0.31$                             | $-0.29 \pm 0.32$                              | $0.87 \pm 0.47$                                | $-1.04 \pm 0.49$                               |
| OXE    |      | $0.47 \pm 0.04$                          | $-0.21 \pm 0.11$                             | $-0.20 \pm 0.10$                              | $-0.18 \pm 0.14$                               | $-0.21 \pm 0.13$                               |
|        | b    | $0.59 \pm 0.04$                          | $-0.04 \pm 0.11$                             | $-0.01 \pm 0.10$                              | $-0.01 \pm 0.17$                               | $-0.03 \pm 0.13$                               |
|        | ba   | $0.49 \pm 0.04$                          | $-0.07 \pm 0.11$                             | $-0.05 \pm 0.09$                              | $0.02 \pm 0.13$                                | $-0.14 \pm 0.14$                               |
|        | bad  | $0.64 \pm 0.04$                          | $-0.11 \pm 0.11$                             | $-0.10 \pm 0.09$                              | $-0.05 \pm 0.12$                               | $-0.17 \pm 0.15$                               |
|        | badq | $0.88 \pm 0.05$                          | $-0.01 \pm 0.18$                             | $0.01 \pm 0.15$                               | $-0.05 \pm 0.25$                               | $-0.09 \pm 0.23$                               |
| N4B    |      | $0.11 \pm 0.06$                          | $-0.43 \pm 0.13$                             | $-0.42 \pm 0.11$                              | $-0.59 \pm 0.17$                               | $-0.21 \pm 0.17$                               |
|        | b    | $0.03 \pm 0.04$                          | $0.04 \pm 0.14$                              | $0.03 \pm 0.12$                               | $-0.12 \pm 0.20$                               | $0.16 \pm 0.17$                                |
|        | ba   | $0.15 \pm 0.04$                          | $-0.41 \pm 0.12$                             | $-0.46 \pm 0.10$                              | $-0.47 \pm 0.15$                               | $-0.43 \pm 0.14$                               |
|        | bad  | $0.20 \pm 0.04$                          | $-0.13 \pm 0.12$                             | $-0.14 \pm 0.10$                              | $-0.20 \pm 0.14$                               | $-0.07 \pm 0.15$                               |
|        | badq | $-0.07 \pm 0.05$                         | $-0.02 \pm 0.14$                             | $-0.04 \pm 0.14$                              | $0.17 \pm 0.19$                                | $-0.25 \pm 0.19$                               |

Table 46: MM-to-QM net ligand binding free energy correction values 2- $\lambda$  states simulated for 20 ps

| Molec. | MM'  | $\Delta G_{\text{TI3}}^{N_\lambda=11}$ | $\Delta\Delta G_{\text{TI}}^{N_\lambda=2}$ | $\Delta\Delta G_{\text{BAR}}^{N_\lambda=2}$ | $\Delta\Delta G_{\text{IEXP}}^{N_\lambda=1}$ | $\Delta\Delta G_{\text{DEXP}}^{N_\lambda=1}$ |
|--------|------|----------------------------------------|--------------------------------------------|---------------------------------------------|----------------------------------------------|----------------------------------------------|
| BNZ    |      | $0.05 \pm 0.03$                        | $0.28 \pm 0.34$                            | $0.46 \pm 0.30$                             | $0.93 \pm 0.43$                              | $0.92 \pm 0.39$                              |
|        | b    | $0.10 \pm 0.02$                        | $0.06 \pm 0.22$                            | $0.19 \pm 0.21$                             | $0.67 \pm 0.23$                              | $-0.26 \pm 0.31$                             |
|        | ba   | $0.09 \pm 0.02$                        | $0.07 \pm 0.22$                            | $0.26 \pm 0.19$                             | $0.55 \pm 0.19$                              | $0.19 \pm 0.21$                              |
|        | bad  | $0.14 \pm 0.02$                        | $-0.03 \pm 0.19$                           | $0.07 \pm 0.20$                             | $0.46 \pm 0.19$                              | $0.22 \pm 0.38$                              |
|        | badq | $0.06 \pm 0.02$                        | $0.59 \pm 0.21$                            | $0.65 \pm 0.23$                             | $0.66 \pm 0.30$                              | $0.54 \pm 0.24$                              |
| PXY    |      | $0.46 \pm 0.04$                        | $0.52 \pm 0.49$                            | $0.45 \pm 0.56$                             | $0.22 \pm 0.65$                              | $-0.62 \pm 0.60$                             |
|        | b    | $0.43 \pm 0.04$                        | $0.12 \pm 0.40$                            | $-0.03 \pm 0.33$                            | $0.40 \pm 0.25$                              | $-0.66 \pm 0.29$                             |
|        | ba   | $0.36 \pm 0.03$                        | $0.92 \pm 0.30$                            | $0.95 \pm 0.35$                             | $2.29 \pm 0.60$                              | $1.76 \pm 0.54$                              |
|        | bad  | $0.46 \pm 0.04$                        | $0.86 \pm 0.26$                            | $0.78 \pm 0.30$                             | $2.18 \pm 0.60$                              | $0.23 \pm 0.34$                              |
|        | badq | $0.38 \pm 0.06$                        | $0.59 \pm 0.62$                            | $-0.78 \pm 0.57$                            | $0.89 \pm 0.64$                              | $-2.17 \pm 0.38$                             |
| I4B    |      | $0.06 \pm 0.04$                        | $-0.66 \pm 0.47$                           | $-0.87 \pm 0.51$                            | $-0.09 \pm 0.67$                             | $-0.54 \pm 0.52$                             |
|        | b    | $0.00 \pm 0.04$                        | $0.13 \pm 0.49$                            | $0.44 \pm 0.54$                             | $0.33 \pm 0.50$                              | $-0.27 \pm 0.47$                             |
|        | ba   | $0.12 \pm 0.04$                        | $0.12 \pm 0.35$                            | $0.06 \pm 0.47$                             | $0.21 \pm 0.43$                              | $-0.02 \pm 0.51$                             |
|        | bad  | $-0.01 \pm 0.04$                       | $-0.11 \pm 0.36$                           | $-0.22 \pm 0.40$                            | $0.33 \pm 0.33$                              | $-0.99 \pm 0.37$                             |
|        | badq | $0.11 \pm 0.06$                        | $-0.01 \pm 0.65$                           | $-1.13 \pm 0.49$                            | $-0.64 \pm 0.41$                             | $-1.99 \pm 0.35$                             |
| BZF    |      | $-0.69 \pm 0.07$                       | $0.26 \pm 0.59$                            | $1.28 \pm 0.69$                             | $0.79 \pm 0.59$                              | $2.44 \pm 0.54$                              |
|        | b    | $-0.70 \pm 0.08$                       | $-1.02 \pm 0.75$                           | $-1.50 \pm 0.84$                            | $-0.16 \pm 0.57$                             | $-2.98 \pm 0.71$                             |
|        | ba   | $-0.46 \pm 0.05$                       | $0.59 \pm 0.40$                            | $0.55 \pm 0.41$                             | $-0.07 \pm 0.41$                             | $2.00 \pm 0.50$                              |
|        | bad  | $-0.53 \pm 0.05$                       | $0.35 \pm 0.41$                            | $0.45 \pm 0.40$                             | $0.19 \pm 0.41$                              | $0.61 \pm 0.37$                              |
|        | badq | $-0.42 \pm 0.05$                       | $1.69 \pm 0.56$                            | $1.45 \pm 0.69$                             | $1.82 \pm 0.60$                              | $0.35 \pm 0.49$                              |
| DEN    |      | $-0.21 \pm 0.06$                       | $-0.27 \pm 0.48$                           | $-0.94 \pm 0.52$                            | $0.05 \pm 0.60$                              | $-1.89 \pm 0.41$                             |
|        | b    | $-0.18 \pm 0.06$                       | $0.32 \pm 0.60$                            | $0.45 \pm 0.59$                             | $-0.01 \pm 0.50$                             | $0.50 \pm 0.49$                              |
|        | ba   | $-0.25 \pm 0.04$                       | $-0.55 \pm 0.30$                           | $-0.55 \pm 0.35$                            | $-0.17 \pm 0.33$                             | $-0.41 \pm 0.46$                             |

*Continued on next page*

Table 46 – Continued from previous page

| Molec. | MM'  | $\Delta G_{\text{TI3}}^{N_{\lambda}=11}$ | $\Delta\Delta G_{\text{TI}}^{N_{\lambda}=2}$ | $\Delta\Delta G_{\text{BAR}}^{N_{\lambda}=2}$ | $\Delta\Delta G_{\text{IEXP}}^{N_{\lambda}=1}$ | $\Delta\Delta G_{\text{DEXP}}^{N_{\lambda}=1}$ |
|--------|------|------------------------------------------|----------------------------------------------|-----------------------------------------------|------------------------------------------------|------------------------------------------------|
|        | bad  | $-0.26 \pm 0.04$                         | $0.07 \pm 0.29$                              | $-0.02 \pm 0.25$                              | $-0.20 \pm 0.26$                               | $0.02 \pm 0.28$                                |
|        | badq | $-0.11 \pm 0.04$                         | $0.18 \pm 0.40$                              | $-0.30 \pm 0.34$                              | $0.80 \pm 0.30$                                | $-1.40 \pm 0.28$                               |
| IND    |      | $0.64 \pm 0.08$                          | $0.58 \pm 0.84$                              | $0.38 \pm 0.89$                               | $2.74 \pm 0.62$                                | $-2.28 \pm 0.70$                               |
|        | b    | $0.04 \pm 0.08$                          | $-0.20 \pm 0.89$                             | $0.26 \pm 0.95$                               | $1.87 \pm 0.64$                                | $-1.37 \pm 0.74$                               |
|        | ba   | $0.24 \pm 0.07$                          | $-0.24 \pm 0.57$                             | $-0.63 \pm 0.51$                              | $4.53 \pm 0.60$                                | $-3.97 \pm 0.51$                               |
|        | bad  | $0.11 \pm 0.05$                          | $0.10 \pm 0.49$                              | $0.62 \pm 0.51$                               | $4.69 \pm 0.62$                                | $-1.45 \pm 0.35$                               |
|        | badq | $-0.33 \pm 0.12$                         | $4.93 \pm 1.27$                              | $1.58 \pm 1.04$                               | $11.33 \pm 0.77$                               | $-8.15 \pm 0.75$                               |
| OXE    |      | $0.47 \pm 0.04$                          | $0.22 \pm 0.44$                              | $0.41 \pm 0.50$                               | $0.17 \pm 0.42$                                | $0.67 \pm 0.41$                                |
|        | b    | $0.59 \pm 0.04$                          | $0.03 \pm 0.39$                              | $-0.02 \pm 0.39$                              | $0.11 \pm 0.30$                                | $-0.09 \pm 0.38$                               |
|        | ba   | $0.49 \pm 0.04$                          | $-0.13 \pm 0.38$                             | $-0.01 \pm 0.38$                              | $0.07 \pm 0.29$                                | $-0.11 \pm 0.35$                               |
|        | bad  | $0.64 \pm 0.04$                          | $0.13 \pm 0.37$                              | $0.33 \pm 0.33$                               | $-0.03 \pm 0.29$                               | $0.68 \pm 0.29$                                |
|        | badq | $0.88 \pm 0.05$                          | $0.92 \pm 0.49$                              | $0.34 \pm 0.48$                               | $1.63 \pm 0.41$                                | $-1.24 \pm 0.38$                               |
| N4B    |      | $0.11 \pm 0.06$                          | $-0.20 \pm 0.37$                             | $-0.27 \pm 0.50$                              | $-1.40 \pm 0.53$                               | $0.20 \pm 0.49$                                |
|        | b    | $0.03 \pm 0.04$                          | $-0.54 \pm 0.40$                             | $-0.59 \pm 0.48$                              | $-1.62 \pm 0.59$                               | $-0.19 \pm 0.41$                               |
|        | ba   | $0.15 \pm 0.04$                          | $-0.56 \pm 0.43$                             | $-0.74 \pm 0.40$                              | $-1.50 \pm 0.50$                               | $0.42 \pm 0.55$                                |
|        | bad  | $0.20 \pm 0.04$                          | $-0.68 \pm 0.38$                             | $-0.93 \pm 0.35$                              | $-1.47 \pm 0.48$                               | $-0.93 \pm 0.30$                               |
|        | badq | $-0.07 \pm 0.05$                         | $0.05 \pm 0.54$                              | $-0.68 \pm 0.57$                              | $-0.40 \pm 0.47$                               | $-1.04 \pm 0.52$                               |

Table 47: MM-to-QM net ligand binding free energy correction values 3- $\lambda$  states simulated for 20 ps

| Molec. | MM'  | $\Delta G_{\text{TI}3}^{N_\lambda=11}$ | $\Delta\Delta G_{\text{TI}}^{N_\lambda=3}$ | $\Delta\Delta G_{\text{BAR}}^{N_\lambda=3}$ | $\Delta\Delta G_{\text{IEXP}}^{N_\lambda=2}$ | $\Delta\Delta G_{\text{DEXP}}^{N_\lambda=2}$ |
|--------|------|----------------------------------------|--------------------------------------------|---------------------------------------------|----------------------------------------------|----------------------------------------------|
| BNZ    |      | $0.05 \pm 0.03$                        | $0.54 \pm 0.26$                            | $0.52 \pm 0.20$                             | $0.68 \pm 0.25$                              | $0.75 \pm 0.31$                              |
|        | b    | $0.10 \pm 0.02$                        | $-0.12 \pm 0.20$                           | $-0.06 \pm 0.15$                            | $0.07 \pm 0.19$                              | $-0.13 \pm 0.21$                             |
|        | ba   | $0.09 \pm 0.02$                        | $-0.21 \pm 0.26$                           | $-0.09 \pm 0.16$                            | $-0.27 \pm 0.29$                             | $0.01 \pm 0.20$                              |
|        | bad  | $0.14 \pm 0.02$                        | $-0.51 \pm 0.13$                           | $-0.41 \pm 0.11$                            | $-0.14 \pm 0.14$                             | $-0.49 \pm 0.19$                             |
|        | badq | $0.06 \pm 0.02$                        | $0.01 \pm 0.24$                            | $0.11 \pm 0.18$                             | $0.15 \pm 0.20$                              | $0.34 \pm 0.34$                              |
| PXY    |      | $0.46 \pm 0.04$                        | $0.26 \pm 0.44$                            | $0.24 \pm 0.34$                             | $0.19 \pm 0.48$                              | $0.30 \pm 0.48$                              |
|        | b    | $0.43 \pm 0.04$                        | $-0.08 \pm 0.32$                           | $-0.09 \pm 0.25$                            | $0.18 \pm 0.29$                              | $-0.36 \pm 0.32$                             |
|        | ba   | $0.36 \pm 0.03$                        | $0.14 \pm 0.21$                            | $0.25 \pm 0.18$                             | $0.80 \pm 0.33$                              | $0.37 \pm 0.37$                              |
|        | bad  | $0.46 \pm 0.04$                        | $0.19 \pm 0.25$                            | $0.30 \pm 0.18$                             | $0.78 \pm 0.37$                              | $0.03 \pm 0.23$                              |
|        | badq | $0.38 \pm 0.06$                        | $0.49 \pm 0.40$                            | $0.47 \pm 0.43$                             | $0.70 \pm 0.44$                              | $-0.57 \pm 0.42$                             |
| I4B    |      | $0.06 \pm 0.04$                        | $-0.71 \pm 0.43$                           | $-0.81 \pm 0.32$                            | $-0.10 \pm 0.58$                             | $-1.21 \pm 0.34$                             |
|        | b    | $0.00 \pm 0.04$                        | $-0.17 \pm 0.31$                           | $-0.10 \pm 0.31$                            | $-0.12 \pm 0.43$                             | $-0.17 \pm 0.35$                             |
|        | ba   | $0.12 \pm 0.04$                        | $-0.54 \pm 0.34$                           | $-0.40 \pm 0.33$                            | $-0.52 \pm 0.44$                             | $-0.38 \pm 0.38$                             |
|        | bad  | $-0.01 \pm 0.04$                       | $0.02 \pm 0.26$                            | $-0.04 \pm 0.26$                            | $0.15 \pm 0.28$                              | $-0.32 \pm 0.26$                             |
|        | badq | $0.11 \pm 0.06$                        | $0.40 \pm 0.62$                            | $0.06 \pm 0.45$                             | $-1.08 \pm 0.59$                             | $0.20 \pm 0.45$                              |
| BZF    |      | $-0.69 \pm 0.07$                       | $-0.25 \pm 0.53$                           | $-0.18 \pm 0.44$                            | $0.11 \pm 0.54$                              | $0.43 \pm 0.59$                              |
|        | b    | $-0.70 \pm 0.08$                       | $0.05 \pm 0.64$                            | $-0.07 \pm 0.62$                            | $0.15 \pm 0.72$                              | $-0.76 \pm 0.67$                             |
|        | ba   | $-0.46 \pm 0.05$                       | $0.66 \pm 0.27$                            | $0.63 \pm 0.22$                             | $0.36 \pm 0.32$                              | $1.13 \pm 0.38$                              |
|        | bad  | $-0.53 \pm 0.05$                       | $-0.12 \pm 0.45$                           | $-0.07 \pm 0.33$                            | $-0.25 \pm 0.40$                             | $0.55 \pm 0.42$                              |
|        | badq | $-0.42 \pm 0.05$                       | $0.28 \pm 0.45$                            | $0.46 \pm 0.41$                             | $0.43 \pm 0.61$                              | $0.13 \pm 0.39$                              |
| DEN    |      | $-0.21 \pm 0.06$                       | $0.21 \pm 0.47$                            | $0.01 \pm 0.35$                             | $0.63 \pm 0.50$                              | $-0.76 \pm 0.47$                             |
|        | b    | $-0.18 \pm 0.06$                       | $-0.17 \pm 0.50$                           | $0.01 \pm 0.40$                             | $-0.02 \pm 0.48$                             | $-0.03 \pm 0.50$                             |
|        | ba   | $-0.25 \pm 0.04$                       | $-0.35 \pm 0.29$                           | $-0.38 \pm 0.23$                            | $-0.31 \pm 0.30$                             | $-0.44 \pm 0.28$                             |

*Continued on next page*

Table 47 – Continued from previous page

| Molec. | MM'  | $\Delta G_{\text{TI3}}^{N_i=11}$ | $\Delta\Delta G_{\text{TI}}^{N_i=3}$ | $\Delta\Delta G_{\text{BAR}}^{N_i=3}$ | $\Delta\Delta G_{\text{IEXP}}^{N_i=2}$ | $\Delta\Delta G_{\text{DEXP}}^{N_i=2}$ |
|--------|------|----------------------------------|--------------------------------------|---------------------------------------|----------------------------------------|----------------------------------------|
|        | bad  | $-0.26 \pm 0.04$                 | $0.12 \pm 0.35$                      | $0.15 \pm 0.21$                       | $-0.39 \pm 0.40$                       | $0.27 \pm 0.23$                        |
|        | badq | $-0.11 \pm 0.04$                 | $0.45 \pm 0.35$                      | $0.25 \pm 0.30$                       | $0.49 \pm 0.34$                        | $-0.18 \pm 0.32$                       |
| IND    |      | $0.64 \pm 0.08$                  | $0.89 \pm 0.64$                      | $0.94 \pm 0.63$                       | $1.40 \pm 0.60$                        | $0.49 \pm 0.79$                        |
|        | b    | $0.04 \pm 0.08$                  | $-0.72 \pm 0.68$                     | $-0.48 \pm 0.65$                      | $-0.56 \pm 0.67$                       | $-0.05 \pm 0.75$                       |
|        | ba   | $0.24 \pm 0.07$                  | $-0.90 \pm 0.45$                     | $-0.89 \pm 0.42$                      | $1.23 \pm 0.60$                        | $-2.18 \pm 0.49$                       |
|        | bad  | $0.11 \pm 0.05$                  | $0.59 \pm 0.31$                      | $0.68 \pm 0.31$                       | $2.39 \pm 0.52$                        | $-0.42 \pm 0.31$                       |
|        | badq | $-0.33 \pm 0.12$                 | $1.56 \pm 1.12$                      | $0.85 \pm 0.96$                       | $4.29 \pm 0.97$                        | $-1.57 \pm 0.73$                       |
| OXE    |      | $0.47 \pm 0.04$                  | $0.15 \pm 0.43$                      | $0.21 \pm 0.34$                       | $0.09 \pm 0.45$                        | $0.56 \pm 0.46$                        |
|        | b    | $0.59 \pm 0.04$                  | $0.07 \pm 0.36$                      | $0.10 \pm 0.28$                       | $-0.05 \pm 0.36$                       | $0.06 \pm 0.32$                        |
|        | ba   | $0.49 \pm 0.04$                  | $-0.41 \pm 0.33$                     | $-0.30 \pm 0.29$                      | $-0.35 \pm 0.31$                       | $-0.25 \pm 0.31$                       |
|        | bad  | $0.64 \pm 0.04$                  | $0.62 \pm 0.32$                      | $0.52 \pm 0.23$                       | $0.35 \pm 0.25$                        | $1.12 \pm 0.39$                        |
|        | badq | $0.88 \pm 0.05$                  | $0.39 \pm 0.37$                      | $0.45 \pm 0.31$                       | $1.03 \pm 0.39$                        | $-0.79 \pm 0.39$                       |
| N4B    |      | $0.11 \pm 0.06$                  | $0.27 \pm 0.35$                      | $0.18 \pm 0.28$                       | $-0.12 \pm 0.37$                       | $0.33 \pm 0.42$                        |
|        | b    | $0.03 \pm 0.04$                  | $0.43 \pm 0.38$                      | $0.26 \pm 0.28$                       | $-0.46 \pm 0.43$                       | $0.59 \pm 0.47$                        |
|        | ba   | $0.15 \pm 0.04$                  | $-1.11 \pm 0.38$                     | $-0.99 \pm 0.28$                      | $-1.45 \pm 0.46$                       | $-0.74 \pm 0.40$                       |
|        | bad  | $0.20 \pm 0.04$                  | $-0.16 \pm 0.37$                     | $-0.32 \pm 0.29$                      | $-0.60 \pm 0.39$                       | $-0.19 \pm 0.39$                       |
|        | badq | $-0.07 \pm 0.05$                 | $-0.07 \pm 0.51$                     | $-0.18 \pm 0.37$                      | $-0.69 \pm 0.51$                       | $-0.11 \pm 0.47$                       |



Table 48: MM-to-QM net ligand binding free energy correction values 6- $\lambda$  states simulated for 20 ps

| Molec. | MM'  | $\Delta G_{\text{TI3}}^{N_\lambda=11}$ | $\Delta\Delta G_{\text{TI}}^{N_\lambda=6}$ | $\Delta\Delta G_{\text{BAR}}^{N_\lambda=6}$ | $\Delta\Delta G_{\text{IEXP}}^{N_\lambda=5}$ | $\Delta\Delta G_{\text{DEXP}}^{N_\lambda=5}$ |
|--------|------|----------------------------------------|--------------------------------------------|---------------------------------------------|----------------------------------------------|----------------------------------------------|
| BNZ    |      | $0.05 \pm 0.03$                        | $0.13 \pm 0.21$                            | $0.14 \pm 0.15$                             | $0.19 \pm 0.21$                              | $0.17 \pm 0.23$                              |
|        | b    | $0.10 \pm 0.02$                        | $-0.14 \pm 0.14$                           | $-0.14 \pm 0.11$                            | $-0.13 \pm 0.15$                             | $-0.14 \pm 0.15$                             |
|        | ba   | $0.09 \pm 0.02$                        | $0.30 \pm 0.10$                            | $0.29 \pm 0.09$                             | $0.35 \pm 0.11$                              | $0.27 \pm 0.11$                              |
|        | bad  | $0.14 \pm 0.02$                        | $0.07 \pm 0.14$                            | $0.06 \pm 0.09$                             | $0.07 \pm 0.14$                              | $0.06 \pm 0.14$                              |
|        | badq | $0.06 \pm 0.02$                        | $0.63 \pm 0.13$                            | $0.63 \pm 0.10$                             | $0.59 \pm 0.16$                              | $0.66 \pm 0.14$                              |
| PXY    |      | $0.46 \pm 0.04$                        | $0.17 \pm 0.26$                            | $0.15 \pm 0.19$                             | $0.19 \pm 0.26$                              | $0.09 \pm 0.30$                              |
|        | b    | $0.43 \pm 0.04$                        | $0.16 \pm 0.22$                            | $0.16 \pm 0.17$                             | $0.16 \pm 0.23$                              | $0.13 \pm 0.22$                              |
|        | ba   | $0.36 \pm 0.03$                        | $0.34 \pm 0.18$                            | $0.37 \pm 0.14$                             | $0.43 \pm 0.21$                              | $0.38 \pm 0.22$                              |
|        | bad  | $0.46 \pm 0.04$                        | $0.00 \pm 0.18$                            | $0.08 \pm 0.12$                             | $0.10 \pm 0.19$                              | $0.03 \pm 0.17$                              |
|        | badq | $0.38 \pm 0.06$                        | $0.20 \pm 0.32$                            | $0.25 \pm 0.24$                             | $0.16 \pm 0.33$                              | $0.02 \pm 0.34$                              |
| I4B    |      | $0.06 \pm 0.04$                        | $0.00 \pm 0.32$                            | $-0.05 \pm 0.21$                            | $-0.22 \pm 0.37$                             | $0.03 \pm 0.29$                              |
|        | b    | $0.00 \pm 0.04$                        | $0.25 \pm 0.22$                            | $0.21 \pm 0.20$                             | $0.32 \pm 0.27$                              | $0.15 \pm 0.25$                              |
|        | ba   | $0.12 \pm 0.04$                        | $0.25 \pm 0.24$                            | $0.27 \pm 0.18$                             | $0.22 \pm 0.27$                              | $0.31 \pm 0.23$                              |
|        | bad  | $-0.01 \pm 0.04$                       | $-0.16 \pm 0.21$                           | $-0.16 \pm 0.16$                            | $-0.13 \pm 0.21$                             | $-0.20 \pm 0.21$                             |
|        | badq | $0.11 \pm 0.06$                        | $0.01 \pm 0.28$                            | $0.00 \pm 0.23$                             | $-0.05 \pm 0.33$                             | $-0.27 \pm 0.29$                             |
| BZF    |      | $-0.69 \pm 0.07$                       | $-0.12 \pm 0.39$                           | $-0.13 \pm 0.26$                            | $-0.52 \pm 0.41$                             | $0.11 \pm 0.36$                              |
|        | b    | $-0.70 \pm 0.08$                       | $0.43 \pm 0.48$                            | $0.40 \pm 0.35$                             | $0.22 \pm 0.53$                              | $0.46 \pm 0.49$                              |
|        | ba   | $-0.46 \pm 0.05$                       | $0.62 \pm 0.25$                            | $0.59 \pm 0.16$                             | $0.31 \pm 0.19$                              | $0.91 \pm 0.27$                              |
|        | bad  | $-0.53 \pm 0.05$                       | $-0.21 \pm 0.23$                           | $-0.17 \pm 0.17$                            | $-0.25 \pm 0.23$                             | $-0.11 \pm 0.23$                             |
|        | badq | $-0.42 \pm 0.05$                       | $0.13 \pm 0.32$                            | $0.19 \pm 0.23$                             | $0.23 \pm 0.34$                              | $0.06 \pm 0.30$                              |
| DEN    |      | $-0.21 \pm 0.06$                       | $0.20 \pm 0.32$                            | $0.19 \pm 0.23$                             | $0.56 \pm 0.34$                              | $-0.13 \pm 0.33$                             |
|        | b    | $-0.18 \pm 0.06$                       | $0.30 \pm 0.31$                            | $0.34 \pm 0.23$                             | $0.27 \pm 0.33$                              | $0.46 \pm 0.31$                              |
|        | ba   | $-0.25 \pm 0.04$                       | $-0.63 \pm 0.18$                           | $-0.59 \pm 0.13$                            | $-0.55 \pm 0.18$                             | $-0.61 \pm 0.19$                             |

*Continued on next page*

Table 48 – Continued from previous page

| Molec. | MM'  | $\Delta G_{\text{TI3}}^{N_{\lambda}=11}$ | $\Delta\Delta G_{\text{TI}}^{N_{\lambda}=6}$ | $\Delta\Delta G_{\text{BAR}}^{N_{\lambda}=6}$ | $\Delta\Delta G_{\text{IEXP}}^{N_{\lambda}=5}$ | $\Delta\Delta G_{\text{DEXP}}^{N_{\lambda}=5}$ |
|--------|------|------------------------------------------|----------------------------------------------|-----------------------------------------------|------------------------------------------------|------------------------------------------------|
|        | bad  | $-0.26 \pm 0.04$                         | $-0.48 \pm 0.21$                             | $-0.49 \pm 0.14$                              | $-0.61 \pm 0.20$                               | $-0.35 \pm 0.21$                               |
|        | badq | $-0.11 \pm 0.04$                         | $-0.39 \pm 0.21$                             | $-0.38 \pm 0.16$                              | $-0.24 \pm 0.24$                               | $-0.61 \pm 0.19$                               |
| IND    |      | $0.64 \pm 0.08$                          | $0.46 \pm 0.43$                              | $0.52 \pm 0.35$                               | $0.71 \pm 0.45$                                | $0.17 \pm 0.49$                                |
|        | b    | $0.04 \pm 0.08$                          | $0.63 \pm 0.43$                              | $0.65 \pm 0.38$                               | $0.48 \pm 0.44$                                | $0.83 \pm 0.51$                                |
|        | ba   | $0.24 \pm 0.07$                          | $-0.29 \pm 0.31$                             | $-0.30 \pm 0.24$                              | $0.19 \pm 0.35$                                | $-0.79 \pm 0.31$                               |
|        | bad  | $0.11 \pm 0.05$                          | $0.44 \pm 0.32$                              | $0.51 \pm 0.23$                               | $0.74 \pm 0.39$                                | $0.28 \pm 0.29$                                |
|        | badq | $-0.33 \pm 0.12$                         | $1.09 \pm 0.58$                              | $0.96 \pm 0.52$                               | $2.02 \pm 0.60$                                | $-0.04 \pm 0.63$                               |
| OXE    |      | $0.47 \pm 0.04$                          | $0.50 \pm 0.23$                              | $0.49 \pm 0.19$                               | $0.47 \pm 0.26$                                | $0.56 \pm 0.27$                                |
|        | b    | $0.59 \pm 0.04$                          | $0.25 \pm 0.23$                              | $0.22 \pm 0.16$                               | $0.24 \pm 0.20$                                | $0.17 \pm 0.30$                                |
|        | ba   | $0.49 \pm 0.04$                          | $0.53 \pm 0.23$                              | $0.51 \pm 0.17$                               | $0.47 \pm 0.23$                                | $0.56 \pm 0.26$                                |
|        | bad  | $0.64 \pm 0.04$                          | $0.25 \pm 0.20$                              | $0.27 \pm 0.14$                               | $0.26 \pm 0.19$                                | $0.33 \pm 0.19$                                |
|        | badq | $0.88 \pm 0.05$                          | $0.44 \pm 0.29$                              | $0.46 \pm 0.22$                               | $0.42 \pm 0.29$                                | $0.44 \pm 0.31$                                |
| N4B    |      | $0.11 \pm 0.06$                          | $0.18 \pm 0.25$                              | $0.16 \pm 0.18$                               | $0.08 \pm 0.25$                                | $0.17 \pm 0.26$                                |
|        | b    | $0.03 \pm 0.04$                          | $0.24 \pm 0.24$                              | $0.19 \pm 0.17$                               | $-0.03 \pm 0.26$                               | $0.39 \pm 0.24$                                |
|        | ba   | $0.15 \pm 0.04$                          | $-0.52 \pm 0.23$                             | $-0.53 \pm 0.17$                              | $-0.69 \pm 0.26$                               | $-0.41 \pm 0.25$                               |
|        | bad  | $0.20 \pm 0.04$                          | $-0.80 \pm 0.22$                             | $-0.82 \pm 0.16$                              | $-0.86 \pm 0.21$                               | $-0.86 \pm 0.22$                               |
|        | badq | $-0.07 \pm 0.05$                         | $0.82 \pm 0.28$                              | $0.75 \pm 0.24$                               | $0.71 \pm 0.30$                                | $0.73 \pm 0.32$                                |

Table 49: MM-to-QM bound-state ligand binding free energy correction values 2- $\lambda$  states simulated for 200 ps

| Molec. | MM'  | $\Delta G_{\text{TI3}}^{N_\lambda=11}$ | $\Delta \Delta G_{\text{TI}}^{N_\lambda=2}$ | $\Delta \Delta G_{\text{BAR}}^{N_\lambda=2}$ | $\Delta \Delta G_{\text{IEXP}}^{N_\lambda=1}$ | $\Delta \Delta G_{\text{DEXP}}^{N_\lambda=1}$ |
|--------|------|----------------------------------------|---------------------------------------------|----------------------------------------------|-----------------------------------------------|-----------------------------------------------|
| BNZ    |      | -145560.83 $\pm$ 0.02                  | 0.02 $\pm$ 0.04                             | 0.00 $\pm$ 0.04                              | -0.13 $\pm$ 0.07                              | 0.01 $\pm$ 0.13                               |
|        | b    | -145561.25 $\pm$ 0.01                  | 0.02 $\pm$ 0.03                             | 0.02 $\pm$ 0.03                              | -0.03 $\pm$ 0.04                              | 0.03 $\pm$ 0.05                               |
|        | ba   | -145565.40 $\pm$ 0.01                  | 0.00 $\pm$ 0.02                             | -0.01 $\pm$ 0.02                             | -0.03 $\pm$ 0.03                              | -0.01 $\pm$ 0.04                              |
|        | bad  | -145565.73 $\pm$ 0.01                  | -0.01 $\pm$ 0.03                            | -0.01 $\pm$ 0.03                             | -0.03 $\pm$ 0.03                              | -0.13 $\pm$ 0.08                              |
|        | badq | -145566.51 $\pm$ 0.01                  | 0.05 $\pm$ 0.03                             | 0.04 $\pm$ 0.03                              | 0.00 $\pm$ 0.04                               | 0.06 $\pm$ 0.04                               |
| PXY    |      | -194835.81 $\pm$ 0.03                  | -0.09 $\pm$ 0.07                            | -0.04 $\pm$ 0.08                             | 0.58 $\pm$ 0.43                               | 0.26 $\pm$ 0.12                               |
|        | b    | -194836.45 $\pm$ 0.03                  | 0.00 $\pm$ 0.07                             | -0.07 $\pm$ 0.08                             | 0.84 $\pm$ 0.50                               | -0.04 $\pm$ 0.18                              |
|        | ba   | -194843.36 $\pm$ 0.02                  | -0.02 $\pm$ 0.05                            | -0.01 $\pm$ 0.05                             | 0.12 $\pm$ 0.12                               | 0.08 $\pm$ 0.06                               |
|        | bad  | -194843.43 $\pm$ 0.02                  | -0.01 $\pm$ 0.05                            | -0.01 $\pm$ 0.05                             | 0.02 $\pm$ 0.12                               | 0.09 $\pm$ 0.07                               |
|        | badq | -194848.27 $\pm$ 0.02                  | -0.04 $\pm$ 0.05                            | -0.04 $\pm$ 0.05                             | 0.14 $\pm$ 0.10                               | -0.27 $\pm$ 0.10                              |
| I4B    |      | -244115.72 $\pm$ 0.03                  | -0.15 $\pm$ 0.10                            | 0.01 $\pm$ 0.10                              | 0.21 $\pm$ 0.20                               | 0.01 $\pm$ 0.35                               |
|        | b    | -244116.40 $\pm$ 0.03                  | -0.06 $\pm$ 0.09                            | 0.11 $\pm$ 0.09                              | 0.12 $\pm$ 0.25                               | 0.52 $\pm$ 0.14                               |
|        | ba   | -244120.30 $\pm$ 0.03                  | -0.06 $\pm$ 0.09                            | 0.04 $\pm$ 0.08                              | -0.15 $\pm$ 0.14                              | 0.31 $\pm$ 0.11                               |
|        | bad  | -244120.62 $\pm$ 0.03                  | -0.13 $\pm$ 0.09                            | -0.02 $\pm$ 0.08                             | -0.18 $\pm$ 0.12                              | -0.27 $\pm$ 0.27                              |
|        | badq | -244120.29 $\pm$ 0.03                  | -0.18 $\pm$ 0.09                            | -0.09 $\pm$ 0.08                             | -0.23 $\pm$ 0.13                              | 0.00 $\pm$ 0.14                               |
| BZF    |      | -240489.62 $\pm$ 0.05                  | -0.25 $\pm$ 0.13                            | 0.01 $\pm$ 0.19                              | -0.07 $\pm$ 0.31                              | 0.03 $\pm$ 0.47                               |
|        | b    | -240489.38 $\pm$ 0.05                  | 0.04 $\pm$ 0.13                             | -0.19 $\pm$ 0.17                             | -1.01 $\pm$ 0.22                              | 0.62 $\pm$ 0.20                               |
|        | ba   | -240530.92 $\pm$ 0.02                  | -0.06 $\pm$ 0.06                            | -0.14 $\pm$ 0.06                             | -0.14 $\pm$ 0.09                              | -0.33 $\pm$ 0.10                              |
|        | bad  | -240530.51 $\pm$ 0.02                  | 0.03 $\pm$ 0.06                             | -0.05 $\pm$ 0.06                             | -0.05 $\pm$ 0.08                              | -0.07 $\pm$ 0.11                              |
|        | badq | -240531.52 $\pm$ 0.03                  | 0.44 $\pm$ 0.08                             | 0.36 $\pm$ 0.08                              | 0.15 $\pm$ 0.11                               | 0.09 $\pm$ 0.36                               |
| DEN    |      | -217978.77 $\pm$ 0.04                  | -0.04 $\pm$ 0.09                            | 0.03 $\pm$ 0.11                              | -0.59 $\pm$ 0.13                              | 0.66 $\pm$ 0.12                               |
|        | b    | -217978.52 $\pm$ 0.04                  | -0.01 $\pm$ 0.11                            | -0.31 $\pm$ 0.11                             | -0.57 $\pm$ 0.17                              | -0.33 $\pm$ 0.21                              |
|        | ba   | -218030.92 $\pm$ 0.02                  | 0.06 $\pm$ 0.05                             | 0.06 $\pm$ 0.04                              | -0.10 $\pm$ 0.05                              | 0.09 $\pm$ 0.08                               |

*Continued on next page*

Table 49 – Continued from previous page

| Molec. | MM'  | $\Delta G_{\text{TI3}}^{N_\lambda=11}$ | $\Delta\Delta G_{\text{TI}}^{N_\lambda=2}$ | $\Delta\Delta G_{\text{BAR}}^{N_\lambda=2}$ | $\Delta\Delta G_{\text{IEXP}}^{N_\lambda=1}$ | $\Delta\Delta G_{\text{DEXP}}^{N_\lambda=1}$ |
|--------|------|----------------------------------------|--------------------------------------------|---------------------------------------------|----------------------------------------------|----------------------------------------------|
|        | bad  | -218028.84 ± 0.02                      | 0.15 ± 0.05                                | 0.11 ± 0.05                                 | -0.05 ± 0.05                                 | 0.05 ± 0.10                                  |
|        | badq | -218028.61 ± 0.02                      | 0.10 ± 0.05                                | 0.06 ± 0.05                                 | -0.23 ± 0.06                                 | 0.04 ± 0.21                                  |
| IND    |      | -228035.12 ± 0.05                      | -0.12 ± 0.14                               | -0.03 ± 0.20                                | -0.27 ± 0.42                                 | 0.07 ± 0.42                                  |
|        | b    | -228035.94 ± 0.05                      | 0.56 ± 0.15                                | -0.08 ± 0.18                                | -1.16 ± 0.23                                 | 1.00 ± 0.19                                  |
|        | ba   | -228074.91 ± 0.04                      | 0.72 ± 0.13                                | 0.14 ± 0.10                                 | -0.39 ± 0.13                                 | 0.21 ± 0.18                                  |
|        | bad  | -228077.33 ± 0.03                      | 0.48 ± 0.09                                | 0.14 ± 0.08                                 | -0.23 ± 0.10                                 | 0.43 ± 0.10                                  |
|        | badq | -228072.52 ± 0.05                      | 0.61 ± 0.13                                | 0.48 ± 0.25                                 | -0.71 ± 0.24                                 | 0.92 ± 0.54                                  |
| OXE    |      | -194837.98 ± 0.03                      | -0.06 ± 0.08                               | 0.01 ± 0.09                                 | -0.14 ± 0.19                                 | 0.23 ± 0.14                                  |
|        | b    | -194838.48 ± 0.02                      | -0.10 ± 0.06                               | -0.04 ± 0.06                                | -0.05 ± 0.12                                 | -0.14 ± 0.16                                 |
|        | ba   | -194846.17 ± 0.02                      | -0.06 ± 0.06                               | 0.05 ± 0.06                                 | 0.03 ± 0.11                                  | 0.12 ± 0.11                                  |
|        | bad  | -194846.38 ± 0.02                      | -0.12 ± 0.06                               | -0.02 ± 0.06                                | -0.05 ± 0.11                                 | 0.19 ± 0.09                                  |
|        | badq | -194844.03 ± 0.03                      | -0.15 ± 0.07                               | -0.08 ± 0.07                                | -0.15 ± 0.10                                 | -0.17 ± 0.13                                 |
| N4B    |      | -244115.50 ± 0.03                      | -0.29 ± 0.09                               | -0.23 ± 0.10                                | -0.01 ± 0.24                                 | -0.13 ± 0.21                                 |
|        | b    | -244116.16 ± 0.03                      | 0.03 ± 0.08                                | 0.04 ± 0.11                                 | -0.39 ± 0.18                                 | 0.49 ± 0.16                                  |
|        | ba   | -244122.56 ± 0.02                      | -0.07 ± 0.06                               | -0.02 ± 0.06                                | -0.13 ± 0.16                                 | 0.19 ± 0.14                                  |
|        | bad  | -244123.06 ± 0.02                      | 0.06 ± 0.06                                | 0.09 ± 0.07                                 | 0.01 ± 0.17                                  | 0.12 ± 0.16                                  |
|        | badq | -244116.03 ± 0.03                      | -0.08 ± 0.08                               | 0.02 ± 0.09                                 | 0.31 ± 0.22                                  | -0.21 ± 0.14                                 |

Table 50: MM-to-QM bound-state ligand binding free energy correction values 3- $\lambda$  states simulated for 200 ps

| Molec. | MM'  | $\Delta G_{\text{TI3}}^{N_\lambda=11}$ | $\Delta\Delta G_{\text{TI}}^{N_\lambda=3}$ | $\Delta\Delta G_{\text{BAR}}^{N_\lambda=3}$ | $\Delta\Delta G_{\text{IEXP}}^{N_\lambda=2}$ | $\Delta\Delta G_{\text{DEXP}}^{N_\lambda=2}$ |
|--------|------|----------------------------------------|--------------------------------------------|---------------------------------------------|----------------------------------------------|----------------------------------------------|
| BNZ    |      | -145560.83 $\pm$ 0.02                  | 0.02 $\pm$ 0.04                            | 0.01 $\pm$ 0.04                             | -0.03 $\pm$ 0.06                             | 0.05 $\pm$ 0.05                              |
|        | b    | -145561.25 $\pm$ 0.01                  | 0.05 $\pm$ 0.03                            | 0.05 $\pm$ 0.02                             | 0.03 $\pm$ 0.03                              | 0.06 $\pm$ 0.03                              |
|        | ba   | -145565.40 $\pm$ 0.01                  | -0.02 $\pm$ 0.02                           | -0.02 $\pm$ 0.02                            | -0.02 $\pm$ 0.02                             | -0.03 $\pm$ 0.03                             |
|        | bad  | -145565.73 $\pm$ 0.01                  | 0.00 $\pm$ 0.03                            | 0.00 $\pm$ 0.02                             | 0.00 $\pm$ 0.02                              | -0.04 $\pm$ 0.04                             |
|        | badq | -145566.51 $\pm$ 0.01                  | 0.01 $\pm$ 0.02                            | 0.01 $\pm$ 0.02                             | 0.00 $\pm$ 0.03                              | 0.03 $\pm$ 0.02                              |
| PXY    |      | -194835.81 $\pm$ 0.03                  | 0.06 $\pm$ 0.07                            | 0.04 $\pm$ 0.05                             | 0.10 $\pm$ 0.12                              | 0.10 $\pm$ 0.08                              |
|        | b    | -194836.45 $\pm$ 0.03                  | -0.01 $\pm$ 0.07                           | -0.02 $\pm$ 0.06                            | 0.08 $\pm$ 0.17                              | -0.01 $\pm$ 0.09                             |
|        | ba   | -194843.36 $\pm$ 0.02                  | -0.08 $\pm$ 0.05                           | -0.07 $\pm$ 0.04                            | 0.03 $\pm$ 0.07                              | -0.10 $\pm$ 0.06                             |
|        | bad  | -194843.43 $\pm$ 0.02                  | 0.00 $\pm$ 0.04                            | -0.01 $\pm$ 0.04                            | 0.01 $\pm$ 0.07                              | -0.01 $\pm$ 0.06                             |
|        | badq | -194848.27 $\pm$ 0.02                  | -0.18 $\pm$ 0.04                           | -0.15 $\pm$ 0.04                            | -0.06 $\pm$ 0.06                             | -0.24 $\pm$ 0.07                             |
| I4B    |      | -244115.72 $\pm$ 0.03                  | -0.02 $\pm$ 0.08                           | 0.02 $\pm$ 0.07                             | 0.07 $\pm$ 0.11                              | 0.05 $\pm$ 0.12                              |
|        | b    | -244116.40 $\pm$ 0.03                  | 0.15 $\pm$ 0.08                            | 0.17 $\pm$ 0.06                             | 0.18 $\pm$ 0.09                              | 0.28 $\pm$ 0.08                              |
|        | ba   | -244120.30 $\pm$ 0.03                  | 0.06 $\pm$ 0.08                            | 0.08 $\pm$ 0.06                             | 0.12 $\pm$ 0.13                              | 0.10 $\pm$ 0.09                              |
|        | bad  | -244120.62 $\pm$ 0.03                  | 0.15 $\pm$ 0.07                            | 0.15 $\pm$ 0.06                             | 0.12 $\pm$ 0.08                              | 0.12 $\pm$ 0.09                              |
|        | badq | -244120.29 $\pm$ 0.03                  | -0.12 $\pm$ 0.08                           | -0.07 $\pm$ 0.06                            | 0.04 $\pm$ 0.12                              | -0.39 $\pm$ 0.18                             |
| BZF    |      | -240489.62 $\pm$ 0.05                  | -0.03 $\pm$ 0.11                           | -0.05 $\pm$ 0.10                            | -0.05 $\pm$ 0.18                             | -0.20 $\pm$ 0.28                             |
|        | b    | -240489.38 $\pm$ 0.05                  | 0.11 $\pm$ 0.11                            | 0.05 $\pm$ 0.11                             | -0.16 $\pm$ 0.18                             | 0.23 $\pm$ 0.15                              |
|        | ba   | -240530.92 $\pm$ 0.02                  | -0.01 $\pm$ 0.05                           | -0.05 $\pm$ 0.04                            | -0.01 $\pm$ 0.07                             | -0.14 $\pm$ 0.06                             |
|        | bad  | -240530.51 $\pm$ 0.02                  | -0.04 $\pm$ 0.05                           | -0.05 $\pm$ 0.04                            | 0.03 $\pm$ 0.09                              | -0.08 $\pm$ 0.06                             |
|        | badq | -240531.52 $\pm$ 0.03                  | 0.19 $\pm$ 0.06                            | 0.21 $\pm$ 0.05                             | 0.12 $\pm$ 0.07                              | 0.18 $\pm$ 0.10                              |
| DEN    |      | -217978.77 $\pm$ 0.04                  | -0.14 $\pm$ 0.09                           | -0.09 $\pm$ 0.07                            | -0.17 $\pm$ 0.09                             | -0.11 $\pm$ 0.12                             |
|        | b    | -217978.52 $\pm$ 0.04                  | 0.00 $\pm$ 0.09                            | -0.06 $\pm$ 0.07                            | -0.10 $\pm$ 0.11                             | -0.17 $\pm$ 0.12                             |
|        | ba   | -218030.92 $\pm$ 0.02                  | 0.07 $\pm$ 0.04                            | 0.06 $\pm$ 0.04                             | 0.05 $\pm$ 0.05                              | 0.09 $\pm$ 0.04                              |

*Continued on next page*

Table 50 – *Continued from previous page*

| Molec. | MM'  | $\Delta G_{\text{TI}3}^{N_{\lambda}=11}$ | $\Delta\Delta G_{\text{TI}}^{N_{\lambda}=3}$ | $\Delta\Delta G_{\text{BAR}}^{N_{\lambda}=3}$ | $\Delta\Delta G_{\text{IEXP}}^{N_{\lambda}=2}$ | $\Delta\Delta G_{\text{DEXP}}^{N_{\lambda}=2}$ |
|--------|------|------------------------------------------|----------------------------------------------|-----------------------------------------------|------------------------------------------------|------------------------------------------------|
|        | bad  | -218028.84 ± 0.02                        | 0.08 ± 0.04                                  | 0.09 ± 0.04                                   | 0.08 ± 0.05                                    | 0.05 ± 0.06                                    |
|        | badq | -218028.61 ± 0.02                        | -0.01 ± 0.04                                 | 0.00 ± 0.04                                   | -0.06 ± 0.08                                   | 0.02 ± 0.07                                    |
| IND    |      | -228035.12 ± 0.05                        | 0.07 ± 0.12                                  | 0.07 ± 0.11                                   | 0.10 ± 0.19                                    | -0.12 ± 0.23                                   |
|        | b    | -228035.94 ± 0.05                        | 0.06 ± 0.12                                  | 0.01 ± 0.10                                   | -0.27 ± 0.14                                   | 0.12 ± 0.15                                    |
|        | ba   | -228074.91 ± 0.04                        | 0.13 ± 0.08                                  | 0.04 ± 0.07                                   | -0.24 ± 0.09                                   | 0.16 ± 0.10                                    |
|        | bad  | -228077.33 ± 0.03                        | 0.14 ± 0.07                                  | 0.09 ± 0.06                                   | -0.02 ± 0.09                                   | 0.21 ± 0.08                                    |
|        | badq | -228072.52 ± 0.05                        | 0.11 ± 0.12                                  | 0.09 ± 0.12                                   | -0.11 ± 0.32                                   | 0.37 ± 0.28                                    |
| OXE    |      | -194837.98 ± 0.03                        | 0.01 ± 0.08                                  | 0.01 ± 0.06                                   | 0.07 ± 0.10                                    | 0.01 ± 0.09                                    |
|        | b    | -194838.48 ± 0.02                        | -0.06 ± 0.05                                 | -0.05 ± 0.04                                  | -0.03 ± 0.06                                   | -0.07 ± 0.07                                   |
|        | ba   | -194846.17 ± 0.02                        | 0.03 ± 0.05                                  | 0.04 ± 0.04                                   | 0.05 ± 0.06                                    | 0.06 ± 0.06                                    |
|        | bad  | -194846.38 ± 0.02                        | -0.08 ± 0.05                                 | -0.06 ± 0.04                                  | -0.06 ± 0.06                                   | -0.02 ± 0.07                                   |
|        | badq | -194844.03 ± 0.03                        | -0.12 ± 0.06                                 | -0.11 ± 0.06                                  | -0.08 ± 0.09                                   | -0.12 ± 0.08                                   |
| N4B    |      | -244115.50 ± 0.03                        | -0.16 ± 0.07                                 | -0.16 ± 0.07                                  | -0.18 ± 0.10                                   | -0.11 ± 0.10                                   |
|        | b    | -244116.16 ± 0.03                        | -0.04 ± 0.07                                 | -0.02 ± 0.07                                  | -0.18 ± 0.09                                   | 0.13 ± 0.09                                    |
|        | ba   | -244122.56 ± 0.02                        | -0.13 ± 0.05                                 | -0.11 ± 0.04                                  | -0.21 ± 0.06                                   | 0.03 ± 0.06                                    |
|        | bad  | -244123.06 ± 0.02                        | 0.03 ± 0.05                                  | 0.04 ± 0.05                                   | -0.01 ± 0.09                                   | 0.12 ± 0.09                                    |
|        | badq | -244116.03 ± 0.03                        | 0.07 ± 0.07                                  | 0.07 ± 0.08                                   | 0.25 ± 0.13                                    | -0.12 ± 0.11                                   |

Table 51: MM-to-QM bound-state ligand binding free energy correction values 6- $\lambda$  states simulated for 200 ps

| Molec. | MM'  | $\Delta G_{\text{TI3}}^{N_\lambda=11}$ | $\Delta\Delta G_{\text{TI}}^{N_\lambda=6}$ | $\Delta\Delta G_{\text{BAR}}^{N_\lambda=6}$ | $\Delta\Delta G_{\text{IEXP}}^{N_\lambda=5}$ | $\Delta\Delta G_{\text{DEXP}}^{N_\lambda=5}$ |
|--------|------|----------------------------------------|--------------------------------------------|---------------------------------------------|----------------------------------------------|----------------------------------------------|
| BNZ    |      | -145560.83 $\pm$ 0.02                  | -0.01 $\pm$ 0.04                           | -0.01 $\pm$ 0.03                            | -0.01 $\pm$ 0.04                             | 0.00 $\pm$ 0.04                              |
|        | b    | -145561.25 $\pm$ 0.01                  | 0.01 $\pm$ 0.02                            | 0.01 $\pm$ 0.01                             | 0.01 $\pm$ 0.02                              | 0.02 $\pm$ 0.02                              |
|        | ba   | -145565.40 $\pm$ 0.01                  | 0.00 $\pm$ 0.02                            | 0.00 $\pm$ 0.01                             | 0.01 $\pm$ 0.02                              | 0.00 $\pm$ 0.02                              |
|        | bad  | -145565.73 $\pm$ 0.01                  | 0.00 $\pm$ 0.02                            | 0.00 $\pm$ 0.01                             | 0.00 $\pm$ 0.02                              | -0.01 $\pm$ 0.02                             |
|        | badq | -145566.51 $\pm$ 0.01                  | 0.02 $\pm$ 0.02                            | 0.03 $\pm$ 0.01                             | 0.02 $\pm$ 0.02                              | 0.03 $\pm$ 0.02                              |
| PXY    |      | -194835.81 $\pm$ 0.03                  | -0.03 $\pm$ 0.05                           | -0.03 $\pm$ 0.04                            | -0.05 $\pm$ 0.05                             | 0.01 $\pm$ 0.05                              |
|        | b    | -194836.45 $\pm$ 0.03                  | -0.02 $\pm$ 0.05                           | -0.02 $\pm$ 0.04                            | 0.00 $\pm$ 0.06                              | -0.05 $\pm$ 0.06                             |
|        | ba   | -194843.36 $\pm$ 0.02                  | 0.00 $\pm$ 0.04                            | -0.01 $\pm$ 0.03                            | 0.01 $\pm$ 0.04                              | -0.02 $\pm$ 0.04                             |
|        | bad  | -194843.43 $\pm$ 0.02                  | -0.01 $\pm$ 0.04                           | -0.01 $\pm$ 0.03                            | -0.02 $\pm$ 0.04                             | 0.00 $\pm$ 0.04                              |
|        | badq | -194848.27 $\pm$ 0.02                  | 0.13 $\pm$ 0.04                            | 0.12 $\pm$ 0.04                             | 0.18 $\pm$ 0.05                              | 0.06 $\pm$ 0.04                              |
| I4B    |      | -244115.72 $\pm$ 0.03                  | -0.10 $\pm$ 0.06                           | -0.09 $\pm$ 0.05                            | -0.05 $\pm$ 0.07                             | -0.12 $\pm$ 0.08                             |
|        | b    | -244116.40 $\pm$ 0.03                  | 0.02 $\pm$ 0.05                            | 0.03 $\pm$ 0.05                             | 0.05 $\pm$ 0.07                              | 0.03 $\pm$ 0.07                              |
|        | ba   | -244120.30 $\pm$ 0.03                  | -0.08 $\pm$ 0.05                           | -0.06 $\pm$ 0.04                            | -0.06 $\pm$ 0.06                             | -0.07 $\pm$ 0.06                             |
|        | bad  | -244120.62 $\pm$ 0.03                  | -0.02 $\pm$ 0.05                           | 0.00 $\pm$ 0.04                             | 0.00 $\pm$ 0.05                              | -0.02 $\pm$ 0.06                             |
|        | badq | -244120.29 $\pm$ 0.03                  | -0.05 $\pm$ 0.05                           | -0.04 $\pm$ 0.04                            | -0.01 $\pm$ 0.06                             | -0.07 $\pm$ 0.08                             |
| BZF    |      | -240489.62 $\pm$ 0.05                  | -0.06 $\pm$ 0.09                           | -0.06 $\pm$ 0.07                            | -0.07 $\pm$ 0.09                             | -0.10 $\pm$ 0.11                             |
|        | b    | -240489.38 $\pm$ 0.05                  | -0.06 $\pm$ 0.09                           | -0.06 $\pm$ 0.07                            | -0.05 $\pm$ 0.11                             | -0.06 $\pm$ 0.09                             |
|        | ba   | -240530.92 $\pm$ 0.02                  | -0.02 $\pm$ 0.04                           | -0.03 $\pm$ 0.03                            | -0.01 $\pm$ 0.04                             | -0.06 $\pm$ 0.04                             |
|        | bad  | -240530.51 $\pm$ 0.02                  | -0.01 $\pm$ 0.04                           | -0.01 $\pm$ 0.03                            | 0.01 $\pm$ 0.04                              | -0.02 $\pm$ 0.04                             |
|        | badq | -240531.52 $\pm$ 0.03                  | 0.00 $\pm$ 0.05                            | 0.01 $\pm$ 0.04                             | 0.01 $\pm$ 0.05                              | -0.01 $\pm$ 0.06                             |
| DEN    |      | -217978.77 $\pm$ 0.04                  | -0.03 $\pm$ 0.06                           | -0.03 $\pm$ 0.06                            | -0.03 $\pm$ 0.06                             | -0.04 $\pm$ 0.07                             |
|        | b    | -217978.52 $\pm$ 0.04                  | -0.09 $\pm$ 0.06                           | -0.09 $\pm$ 0.06                            | -0.10 $\pm$ 0.07                             | -0.12 $\pm$ 0.07                             |
|        | ba   | -218030.92 $\pm$ 0.02                  | 0.01 $\pm$ 0.04                            | 0.02 $\pm$ 0.03                             | 0.02 $\pm$ 0.04                              | 0.02 $\pm$ 0.04                              |

*Continued on next page*

Table 51 – *Continued from previous page*

| Molec. | MM'  | $\Delta G_{\text{TI3}}^{N_\lambda=11}$ | $\Delta\Delta G_{\text{TI}}^{N_\lambda=6}$ | $\Delta\Delta G_{\text{BAR}}^{N_\lambda=6}$ | $\Delta\Delta G_{\text{IEXP}}^{N_\lambda=5}$ | $\Delta\Delta G_{\text{DEXP}}^{N_\lambda=5}$ |
|--------|------|----------------------------------------|--------------------------------------------|---------------------------------------------|----------------------------------------------|----------------------------------------------|
|        | bad  | -218028.84 ± 0.02                      | 0.00 ± 0.04                                | 0.01 ± 0.03                                 | 0.01 ± 0.04                                  | 0.00 ± 0.04                                  |
|        | badq | -218028.61 ± 0.02                      | -0.06 ± 0.04                               | -0.06 ± 0.03                                | -0.07 ± 0.04                                 | -0.04 ± 0.04                                 |
| IND    |      | -228035.12 ± 0.05                      | -0.05 ± 0.09                               | -0.05 ± 0.08                                | 0.09 ± 0.10                                  | -0.18 ± 0.11                                 |
|        | b    | -228035.94 ± 0.05                      | -0.01 ± 0.09                               | -0.01 ± 0.08                                | -0.02 ± 0.10                                 | -0.08 ± 0.10                                 |
|        | ba   | -228074.91 ± 0.04                      | -0.02 ± 0.06                               | -0.04 ± 0.06                                | 0.03 ± 0.11                                  | -0.03 ± 0.06                                 |
|        | bad  | -228077.33 ± 0.03                      | 0.04 ± 0.05                                | 0.04 ± 0.04                                 | 0.00 ± 0.06                                  | 0.07 ± 0.05                                  |
|        | badq | -228072.52 ± 0.05                      | 0.06 ± 0.09                                | 0.04 ± 0.09                                 | -0.04 ± 0.13                                 | 0.12 ± 0.12                                  |
| OXE    |      | -194837.98 ± 0.03                      | -0.04 ± 0.05                               | -0.03 ± 0.04                                | -0.05 ± 0.05                                 | -0.04 ± 0.06                                 |
|        | b    | -194838.48 ± 0.02                      | -0.07 ± 0.04                               | -0.07 ± 0.04                                | -0.07 ± 0.04                                 | -0.07 ± 0.04                                 |
|        | ba   | -194846.17 ± 0.02                      | -0.03 ± 0.04                               | -0.03 ± 0.04                                | -0.01 ± 0.04                                 | -0.04 ± 0.04                                 |
|        | bad  | -194846.38 ± 0.02                      | 0.03 ± 0.04                                | 0.03 ± 0.04                                 | 0.03 ± 0.04                                  | 0.03 ± 0.04                                  |
|        | badq | -194844.03 ± 0.03                      | 0.01 ± 0.05                                | 0.01 ± 0.04                                 | 0.04 ± 0.06                                  | -0.03 ± 0.06                                 |
| N4B    |      | -244115.50 ± 0.03                      | 0.02 ± 0.05                                | 0.01 ± 0.04                                 | 0.00 ± 0.06                                  | 0.01 ± 0.06                                  |
|        | b    | -244116.16 ± 0.03                      | 0.12 ± 0.05                                | 0.11 ± 0.04                                 | 0.06 ± 0.06                                  | 0.16 ± 0.06                                  |
|        | ba   | -244122.56 ± 0.02                      | 0.01 ± 0.04                                | 0.02 ± 0.04                                 | -0.02 ± 0.04                                 | 0.03 ± 0.04                                  |
|        | bad  | -244123.06 ± 0.02                      | 0.02 ± 0.04                                | 0.03 ± 0.04                                 | 0.01 ± 0.04                                  | 0.03 ± 0.05                                  |
|        | badq | -244116.03 ± 0.03                      | -0.07 ± 0.05                               | -0.06 ± 0.05                                | 0.03 ± 0.09                                  | -0.15 ± 0.09                                 |



Table 52: MM-to-QM bound-state ligand binding free energy correction values 2- $\lambda$  states simulated for 100 ps

| Molec. | MM'  | $\Delta G_{\text{TI3}}^{N_\lambda=11}$ | $\Delta \Delta G_{\text{TI}}^{N_\lambda=2}$ | $\Delta \Delta G_{\text{BAR}}^{N_\lambda=2}$ | $\Delta \Delta G_{\text{IEXP}}^{N_\lambda=1}$ | $\Delta \Delta G_{\text{DEXP}}^{N_\lambda=1}$ |
|--------|------|----------------------------------------|---------------------------------------------|----------------------------------------------|-----------------------------------------------|-----------------------------------------------|
| BNZ    |      | -145560.83 $\pm$ 0.02                  | 0.04 $\pm$ 0.06                             | 0.06 $\pm$ 0.06                              | -0.02 $\pm$ 0.10                              | 0.16 $\pm$ 0.11                               |
|        | b    | -145561.25 $\pm$ 0.01                  | -0.06 $\pm$ 0.05                            | -0.04 $\pm$ 0.04                             | 0.08 $\pm$ 0.06                               | -0.11 $\pm$ 0.06                              |
|        | ba   | -145565.40 $\pm$ 0.01                  | -0.02 $\pm$ 0.04                            | -0.02 $\pm$ 0.04                             | 0.05 $\pm$ 0.05                               | -0.11 $\pm$ 0.08                              |
|        | bad  | -145565.73 $\pm$ 0.01                  | -0.01 $\pm$ 0.04                            | 0.00 $\pm$ 0.04                              | 0.03 $\pm$ 0.05                               | -0.06 $\pm$ 0.07                              |
|        | badq | -145566.51 $\pm$ 0.01                  | 0.05 $\pm$ 0.04                             | 0.05 $\pm$ 0.04                              | 0.05 $\pm$ 0.05                               | 0.05 $\pm$ 0.05                               |
| PXY    |      | -194835.81 $\pm$ 0.03                  | -0.08 $\pm$ 0.09                            | 0.05 $\pm$ 0.11                              | -0.18 $\pm$ 0.21                              | 0.46 $\pm$ 0.16                               |
|        | b    | -194836.45 $\pm$ 0.03                  | 0.01 $\pm$ 0.09                             | 0.02 $\pm$ 0.10                              | -0.08 $\pm$ 0.23                              | 0.34 $\pm$ 0.14                               |
|        | ba   | -194843.36 $\pm$ 0.02                  | -0.10 $\pm$ 0.06                            | -0.11 $\pm$ 0.06                             | 0.03 $\pm$ 0.12                               | -0.25 $\pm$ 0.21                              |
|        | bad  | -194843.43 $\pm$ 0.02                  | 0.00 $\pm$ 0.07                             | -0.03 $\pm$ 0.07                             | -0.09 $\pm$ 0.12                              | 0.13 $\pm$ 0.10                               |
|        | badq | -194848.27 $\pm$ 0.02                  | -0.12 $\pm$ 0.07                            | -0.11 $\pm$ 0.09                             | -0.29 $\pm$ 0.15                              | 0.10 $\pm$ 0.10                               |
| I4B    |      | -244115.72 $\pm$ 0.03                  | 0.05 $\pm$ 0.13                             | 0.16 $\pm$ 0.11                              | 0.03 $\pm$ 0.21                               | 0.53 $\pm$ 0.15                               |
|        | b    | -244116.40 $\pm$ 0.03                  | 0.18 $\pm$ 0.12                             | 0.27 $\pm$ 0.11                              | -0.20 $\pm$ 0.13                              | 0.05 $\pm$ 0.40                               |
|        | ba   | -244120.30 $\pm$ 0.03                  | -0.08 $\pm$ 0.11                            | -0.01 $\pm$ 0.11                             | -0.19 $\pm$ 0.13                              | 0.25 $\pm$ 0.15                               |
|        | bad  | -244120.62 $\pm$ 0.03                  | 0.04 $\pm$ 0.11                             | 0.10 $\pm$ 0.09                              | -0.20 $\pm$ 0.13                              | 0.51 $\pm$ 0.10                               |
|        | badq | -244120.29 $\pm$ 0.03                  | -0.14 $\pm$ 0.13                            | -0.09 $\pm$ 0.10                             | -0.25 $\pm$ 0.15                              | -0.27 $\pm$ 0.37                              |
| BZF    |      | -240489.62 $\pm$ 0.05                  | -0.27 $\pm$ 0.17                            | 0.05 $\pm$ 0.28                              | 0.05 $\pm$ 0.46                               | 0.35 $\pm$ 0.53                               |
|        | b    | -240489.38 $\pm$ 0.05                  | 0.10 $\pm$ 0.19                             | -0.37 $\pm$ 0.24                             | -1.05 $\pm$ 0.30                              | 0.46 $\pm$ 0.23                               |
|        | ba   | -240530.92 $\pm$ 0.02                  | -0.02 $\pm$ 0.09                            | -0.10 $\pm$ 0.08                             | -0.08 $\pm$ 0.13                              | -0.20 $\pm$ 0.12                              |
|        | bad  | -240530.51 $\pm$ 0.02                  | 0.07 $\pm$ 0.08                             | 0.01 $\pm$ 0.08                              | 0.02 $\pm$ 0.14                               | 0.09 $\pm$ 0.11                               |
|        | badq | -240531.52 $\pm$ 0.03                  | 0.14 $\pm$ 0.09                             | 0.08 $\pm$ 0.10                              | 0.08 $\pm$ 0.15                               | 0.22 $\pm$ 0.17                               |
| DEN    |      | -217978.77 $\pm$ 0.04                  | -0.27 $\pm$ 0.14                            | -0.18 $\pm$ 0.14                             | 0.14 $\pm$ 0.33                               | -0.49 $\pm$ 0.32                              |
|        | b    | -217978.52 $\pm$ 0.04                  | 0.17 $\pm$ 0.15                             | 0.01 $\pm$ 0.16                              | -0.27 $\pm$ 0.28                              | -1.32 $\pm$ 0.57                              |
|        | ba   | -218030.92 $\pm$ 0.02                  | 0.07 $\pm$ 0.07                             | 0.08 $\pm$ 0.06                              | 0.00 $\pm$ 0.11                               | 0.23 $\pm$ 0.08                               |

*Continued on next page*

Table 52 – Continued from previous page

| Molec. | MM'  | $\Delta G_{\text{TI3}}^{N_{\lambda}=11}$ | $\Delta\Delta G_{\text{TI}}^{N_{\lambda}=2}$ | $\Delta\Delta G_{\text{BAR}}^{N_{\lambda}=2}$ | $\Delta\Delta G_{\text{IEXP}}^{N_{\lambda}=1}$ | $\Delta\Delta G_{\text{DEXP}}^{N_{\lambda}=1}$ |
|--------|------|------------------------------------------|----------------------------------------------|-----------------------------------------------|------------------------------------------------|------------------------------------------------|
|        | bad  | -218028.84 ± 0.02                        | 0.19 ± 0.07                                  | 0.14 ± 0.07                                   | 0.05 ± 0.11                                    | 0.24 ± 0.10                                    |
|        | badq | -218028.61 ± 0.02                        | 0.18 ± 0.07                                  | 0.11 ± 0.07                                   | 0.04 ± 0.14                                    | 0.22 ± 0.11                                    |
| IND    |      | -228035.12 ± 0.05                        | -0.13 ± 0.20                                 | -0.24 ± 0.26                                  | -0.54 ± 0.42                                   | -0.38 ± 0.30                                   |
|        | b    | -228035.94 ± 0.05                        | 0.63 ± 0.22                                  | 0.18 ± 0.25                                   | -0.95 ± 0.22                                   | 1.13 ± 0.24                                    |
|        | ba   | -228074.91 ± 0.04                        | 0.42 ± 0.16                                  | -0.14 ± 0.13                                  | -0.44 ± 0.16                                   | 0.15 ± 0.16                                    |
|        | bad  | -228077.33 ± 0.03                        | 0.39 ± 0.11                                  | 0.14 ± 0.11                                   | -0.30 ± 0.14                                   | 0.36 ± 0.18                                    |
|        | badq | -228072.52 ± 0.05                        | 0.66 ± 0.19                                  | 0.02 ± 0.31                                   | -0.41 ± 0.30                                   | 0.73 ± 0.47                                    |
| OXE    |      | -194837.98 ± 0.03                        | -0.14 ± 0.09                                 | -0.04 ± 0.11                                  | -0.20 ± 0.17                                   | 0.12 ± 0.18                                    |
|        | b    | -194838.48 ± 0.02                        | -0.22 ± 0.09                                 | -0.17 ± 0.09                                  | -0.19 ± 0.14                                   | -0.16 ± 0.21                                   |
|        | ba   | -194846.17 ± 0.02                        | -0.05 ± 0.08                                 | 0.03 ± 0.08                                   | -0.18 ± 0.11                                   | 0.22 ± 0.11                                    |
|        | bad  | -194846.38 ± 0.02                        | -0.17 ± 0.09                                 | -0.13 ± 0.09                                  | -0.25 ± 0.11                                   | 0.05 ± 0.15                                    |
|        | badq | -194844.03 ± 0.03                        | -0.24 ± 0.09                                 | -0.17 ± 0.09                                  | -0.03 ± 0.21                                   | -0.73 ± 0.31                                   |
| N4B    |      | -244115.50 ± 0.03                        | -0.32 ± 0.11                                 | -0.23 ± 0.14                                  | -0.50 ± 0.25                                   | 0.31 ± 0.22                                    |
|        | b    | -244116.16 ± 0.03                        | -0.20 ± 0.10                                 | -0.15 ± 0.14                                  | -0.72 ± 0.20                                   | 0.62 ± 0.15                                    |
|        | ba   | -244122.56 ± 0.02                        | -0.24 ± 0.10                                 | -0.19 ± 0.11                                  | -0.39 ± 0.16                                   | 0.00 ± 0.20                                    |
|        | bad  | -244123.06 ± 0.02                        | -0.15 ± 0.10                                 | -0.07 ± 0.10                                  | -0.30 ± 0.15                                   | -0.20 ± 0.28                                   |
|        | badq | -244116.03 ± 0.03                        | -0.13 ± 0.11                                 | -0.04 ± 0.12                                  | -0.10 ± 0.18                                   | -0.08 ± 0.28                                   |

Table 53: MM-to-QM bound-state ligand binding free energy correction values 3- $\lambda$  states simulated for 100 ps

| Molec. | MM'  | $\Delta G_{\text{TI}3}^{N_\lambda=11}$ | $\Delta\Delta G_{\text{TI}}^{N_\lambda=3}$ | $\Delta\Delta G_{\text{BAR}}^{N_\lambda=3}$ | $\Delta\Delta G_{\text{IEXP}}^{N_\lambda=2}$ | $\Delta\Delta G_{\text{DEXP}}^{N_\lambda=2}$ |
|--------|------|----------------------------------------|--------------------------------------------|---------------------------------------------|----------------------------------------------|----------------------------------------------|
| BNZ    |      | -145560.83 $\pm$ 0.02                  | -0.01 $\pm$ 0.06                           | 0.00 $\pm$ 0.04                             | 0.00 $\pm$ 0.08                              | 0.05 $\pm$ 0.06                              |
|        | b    | -145561.25 $\pm$ 0.01                  | -0.05 $\pm$ 0.04                           | -0.05 $\pm$ 0.03                            | 0.02 $\pm$ 0.05                              | -0.10 $\pm$ 0.05                             |
|        | ba   | -145565.40 $\pm$ 0.01                  | 0.01 $\pm$ 0.04                            | 0.00 $\pm$ 0.03                             | 0.03 $\pm$ 0.04                              | -0.03 $\pm$ 0.05                             |
|        | bad  | -145565.73 $\pm$ 0.01                  | 0.04 $\pm$ 0.03                            | 0.03 $\pm$ 0.03                             | 0.04 $\pm$ 0.04                              | 0.01 $\pm$ 0.04                              |
|        | badq | -145566.51 $\pm$ 0.01                  | 0.05 $\pm$ 0.04                            | 0.05 $\pm$ 0.03                             | 0.05 $\pm$ 0.04                              | 0.05 $\pm$ 0.04                              |
| PXY    |      | -194835.81 $\pm$ 0.03                  | 0.04 $\pm$ 0.08                            | 0.03 $\pm$ 0.07                             | -0.09 $\pm$ 0.10                             | 0.24 $\pm$ 0.09                              |
|        | b    | -194836.45 $\pm$ 0.03                  | -0.03 $\pm$ 0.09                           | -0.02 $\pm$ 0.08                            | -0.05 $\pm$ 0.12                             | 0.01 $\pm$ 0.15                              |
|        | ba   | -194843.36 $\pm$ 0.02                  | -0.02 $\pm$ 0.06                           | -0.04 $\pm$ 0.05                            | 0.02 $\pm$ 0.08                              | -0.08 $\pm$ 0.09                             |
|        | bad  | -194843.43 $\pm$ 0.02                  | -0.02 $\pm$ 0.06                           | -0.03 $\pm$ 0.06                            | -0.06 $\pm$ 0.11                             | 0.02 $\pm$ 0.11                              |
|        | badq | -194848.27 $\pm$ 0.02                  | -0.10 $\pm$ 0.07                           | -0.10 $\pm$ 0.06                            | -0.17 $\pm$ 0.10                             | -0.02 $\pm$ 0.09                             |
| I4B    |      | -244115.72 $\pm$ 0.03                  | 0.09 $\pm$ 0.11                            | 0.15 $\pm$ 0.09                             | 0.18 $\pm$ 0.13                              | -0.02 $\pm$ 0.17                             |
|        | b    | -244116.40 $\pm$ 0.03                  | 0.09 $\pm$ 0.10                            | 0.16 $\pm$ 0.08                             | 0.06 $\pm$ 0.10                              | 0.07 $\pm$ 0.16                              |
|        | ba   | -244120.30 $\pm$ 0.03                  | -0.03 $\pm$ 0.09                           | -0.01 $\pm$ 0.09                            | 0.01 $\pm$ 0.10                              | -0.01 $\pm$ 0.11                             |
|        | bad  | -244120.62 $\pm$ 0.03                  | 0.17 $\pm$ 0.10                            | 0.18 $\pm$ 0.07                             | 0.17 $\pm$ 0.09                              | 0.10 $\pm$ 0.12                              |
|        | badq | -244120.29 $\pm$ 0.03                  | -0.03 $\pm$ 0.10                           | -0.02 $\pm$ 0.08                            | 0.04 $\pm$ 0.11                              | -0.13 $\pm$ 0.15                             |
| BZF    |      | -240489.62 $\pm$ 0.05                  | -0.08 $\pm$ 0.15                           | -0.08 $\pm$ 0.13                            | -0.03 $\pm$ 0.28                             | -0.04 $\pm$ 0.34                             |
|        | b    | -240489.38 $\pm$ 0.05                  | -0.02 $\pm$ 0.16                           | -0.07 $\pm$ 0.14                            | -0.14 $\pm$ 0.28                             | 0.10 $\pm$ 0.20                              |
|        | ba   | -240530.92 $\pm$ 0.02                  | 0.01 $\pm$ 0.07                            | -0.01 $\pm$ 0.05                            | -0.01 $\pm$ 0.08                             | -0.10 $\pm$ 0.08                             |
|        | bad  | -240530.51 $\pm$ 0.02                  | 0.01 $\pm$ 0.07                            | 0.01 $\pm$ 0.05                             | 0.01 $\pm$ 0.08                              | 0.03 $\pm$ 0.07                              |
|        | badq | -240531.52 $\pm$ 0.03                  | 0.12 $\pm$ 0.08                            | 0.11 $\pm$ 0.07                             | 0.04 $\pm$ 0.09                              | 0.16 $\pm$ 0.10                              |
| DEN    |      | -217978.77 $\pm$ 0.04                  | -0.21 $\pm$ 0.13                           | -0.22 $\pm$ 0.10                            | 0.10 $\pm$ 0.17                              | -0.36 $\pm$ 0.16                             |
|        | b    | -217978.52 $\pm$ 0.04                  | 0.13 $\pm$ 0.13                            | 0.10 $\pm$ 0.11                             | 0.10 $\pm$ 0.16                              | -0.21 $\pm$ 0.34                             |
|        | ba   | -218030.92 $\pm$ 0.02                  | 0.11 $\pm$ 0.06                            | 0.10 $\pm$ 0.04                             | 0.10 $\pm$ 0.07                              | 0.15 $\pm$ 0.06                              |

*Continued on next page*

Table 53 – Continued from previous page

| Molec. | MM'  | $\Delta G_{\text{TI3}}^{N_{\lambda}=11}$ | $\Delta\Delta G_{\text{TI}}^{N_{\lambda}=3}$ | $\Delta\Delta G_{\text{BAR}}^{N_{\lambda}=3}$ | $\Delta\Delta G_{\text{IEXP}}^{N_{\lambda}=2}$ | $\Delta\Delta G_{\text{DEXP}}^{N_{\lambda}=2}$ |
|--------|------|------------------------------------------|----------------------------------------------|-----------------------------------------------|------------------------------------------------|------------------------------------------------|
|        | bad  | -218028.84 ± 0.02                        | 0.03 ± 0.06                                  | 0.05 ± 0.05                                   | 0.04 ± 0.08                                    | 0.06 ± 0.07                                    |
|        | badq | -218028.61 ± 0.02                        | 0.01 ± 0.06                                  | 0.03 ± 0.05                                   | -0.05 ± 0.07                                   | 0.09 ± 0.06                                    |
| IND    |      | -228035.12 ± 0.05                        | 0.04 ± 0.17                                  | 0.07 ± 0.16                                   | 0.02 ± 0.26                                    | -0.33 ± 0.28                                   |
|        | b    | -228035.94 ± 0.05                        | 0.03 ± 0.17                                  | 0.03 ± 0.18                                   | -0.11 ± 0.32                                   | -0.13 ± 0.32                                   |
|        | ba   | -228074.91 ± 0.04                        | 0.05 ± 0.11                                  | -0.08 ± 0.09                                  | -0.06 ± 0.19                                   | 0.03 ± 0.11                                    |
|        | bad  | -228077.33 ± 0.03                        | 0.17 ± 0.09                                  | 0.14 ± 0.09                                   | 0.04 ± 0.12                                    | 0.18 ± 0.11                                    |
|        | badq | -228072.52 ± 0.05                        | 0.01 ± 0.17                                  | -0.01 ± 0.15                                  | -0.11 ± 0.25                                   | 0.06 ± 0.28                                    |
| OXE    |      | -194837.98 ± 0.03                        | -0.01 ± 0.09                                 | -0.02 ± 0.08                                  | -0.05 ± 0.10                                   | 0.03 ± 0.11                                    |
|        | b    | -194838.48 ± 0.02                        | -0.20 ± 0.08                                 | -0.18 ± 0.07                                  | -0.17 ± 0.10                                   | -0.25 ± 0.12                                   |
|        | ba   | -194846.17 ± 0.02                        | -0.11 ± 0.08                                 | -0.08 ± 0.06                                  | -0.07 ± 0.09                                   | -0.03 ± 0.08                                   |
|        | bad  | -194846.38 ± 0.02                        | -0.15 ± 0.08                                 | -0.12 ± 0.07                                  | -0.16 ± 0.08                                   | -0.21 ± 0.11                                   |
|        | badq | -194844.03 ± 0.03                        | -0.02 ± 0.09                                 | -0.04 ± 0.08                                  | 0.06 ± 0.10                                    | -0.23 ± 0.18                                   |
| N4B    |      | -244115.50 ± 0.03                        | -0.16 ± 0.09                                 | -0.17 ± 0.09                                  | -0.32 ± 0.17                                   | 0.08 ± 0.14                                    |
|        | b    | -244116.16 ± 0.03                        | -0.13 ± 0.09                                 | -0.12 ± 0.08                                  | -0.49 ± 0.10                                   | 0.27 ± 0.10                                    |
|        | ba   | -244122.56 ± 0.02                        | -0.04 ± 0.08                                 | -0.04 ± 0.07                                  | -0.18 ± 0.09                                   | 0.03 ± 0.12                                    |
|        | bad  | -244123.06 ± 0.02                        | -0.08 ± 0.08                                 | -0.08 ± 0.07                                  | -0.06 ± 0.12                                   | -0.03 ± 0.11                                   |
|        | badq | -244116.03 ± 0.03                        | 0.18 ± 0.09                                  | 0.16 ± 0.09                                   | 0.22 ± 0.14                                    | 0.01 ± 0.19                                    |

Table 54: MM-to-QM bound-state ligand binding free energy correction values 6- $\lambda$  states simulated for 100 ps

| Molec. | MM'  | $\Delta G_{\text{TI3}}^{N_\lambda=11}$ | $\Delta \Delta G_{\text{TI}}^{N_\lambda=6}$ | $\Delta \Delta G_{\text{BAR}}^{N_\lambda=6}$ | $\Delta \Delta G_{\text{IEXP}}^{N_\lambda=5}$ | $\Delta \Delta G_{\text{DEXP}}^{N_\lambda=5}$ |
|--------|------|----------------------------------------|---------------------------------------------|----------------------------------------------|-----------------------------------------------|-----------------------------------------------|
| BNZ    |      | -145560.83 $\pm$ 0.02                  | -0.02 $\pm$ 0.04                            | -0.02 $\pm$ 0.04                             | -0.03 $\pm$ 0.04                              | -0.01 $\pm$ 0.04                              |
|        | b    | -145561.25 $\pm$ 0.01                  | 0.02 $\pm$ 0.03                             | 0.01 $\pm$ 0.02                              | 0.03 $\pm$ 0.03                               | 0.00 $\pm$ 0.03                               |
|        | ba   | -145565.40 $\pm$ 0.01                  | 0.01 $\pm$ 0.02                             | 0.01 $\pm$ 0.02                              | 0.01 $\pm$ 0.02                               | 0.00 $\pm$ 0.02                               |
|        | bad  | -145565.73 $\pm$ 0.01                  | 0.03 $\pm$ 0.02                             | 0.03 $\pm$ 0.02                              | 0.03 $\pm$ 0.02                               | 0.02 $\pm$ 0.03                               |
|        | badq | -145566.51 $\pm$ 0.01                  | 0.05 $\pm$ 0.02                             | 0.05 $\pm$ 0.02                              | 0.05 $\pm$ 0.02                               | 0.05 $\pm$ 0.02                               |
| PXY    |      | -194835.81 $\pm$ 0.03                  | 0.00 $\pm$ 0.06                             | -0.01 $\pm$ 0.05                             | -0.04 $\pm$ 0.07                              | 0.05 $\pm$ 0.07                               |
|        | b    | -194836.45 $\pm$ 0.03                  | -0.09 $\pm$ 0.06                            | -0.09 $\pm$ 0.05                             | -0.12 $\pm$ 0.07                              | -0.05 $\pm$ 0.07                              |
|        | ba   | -194843.36 $\pm$ 0.02                  | 0.04 $\pm$ 0.04                             | 0.03 $\pm$ 0.04                              | 0.05 $\pm$ 0.04                               | 0.02 $\pm$ 0.04                               |
|        | bad  | -194843.43 $\pm$ 0.02                  | -0.04 $\pm$ 0.04                            | -0.04 $\pm$ 0.04                             | -0.06 $\pm$ 0.05                              | -0.01 $\pm$ 0.05                              |
|        | badq | -194848.27 $\pm$ 0.02                  | 0.13 $\pm$ 0.05                             | 0.12 $\pm$ 0.04                              | 0.13 $\pm$ 0.06                               | 0.13 $\pm$ 0.05                               |
| I4B    |      | -244115.72 $\pm$ 0.03                  | -0.03 $\pm$ 0.08                            | -0.01 $\pm$ 0.06                             | 0.03 $\pm$ 0.09                               | -0.08 $\pm$ 0.09                              |
|        | b    | -244116.40 $\pm$ 0.03                  | 0.05 $\pm$ 0.07                             | 0.07 $\pm$ 0.06                              | 0.04 $\pm$ 0.08                               | 0.08 $\pm$ 0.08                               |
|        | ba   | -244120.30 $\pm$ 0.03                  | -0.10 $\pm$ 0.07                            | -0.08 $\pm$ 0.06                             | -0.02 $\pm$ 0.07                              | -0.16 $\pm$ 0.09                              |
|        | bad  | -244120.62 $\pm$ 0.03                  | 0.11 $\pm$ 0.06                             | 0.12 $\pm$ 0.05                              | 0.12 $\pm$ 0.07                               | 0.14 $\pm$ 0.06                               |
|        | badq | -244120.29 $\pm$ 0.03                  | -0.02 $\pm$ 0.07                            | -0.01 $\pm$ 0.06                             | 0.02 $\pm$ 0.08                               | -0.04 $\pm$ 0.08                              |
| BZF    |      | -240489.62 $\pm$ 0.05                  | -0.04 $\pm$ 0.10                            | -0.04 $\pm$ 0.09                             | -0.08 $\pm$ 0.11                              | -0.04 $\pm$ 0.14                              |
|        | b    | -240489.38 $\pm$ 0.05                  | -0.01 $\pm$ 0.11                            | -0.01 $\pm$ 0.09                             | -0.03 $\pm$ 0.14                              | -0.01 $\pm$ 0.14                              |
|        | ba   | -240530.92 $\pm$ 0.02                  | 0.02 $\pm$ 0.05                             | 0.01 $\pm$ 0.04                              | 0.03 $\pm$ 0.05                               | -0.02 $\pm$ 0.05                              |
|        | bad  | -240530.51 $\pm$ 0.02                  | -0.01 $\pm$ 0.05                            | -0.01 $\pm$ 0.04                             | 0.01 $\pm$ 0.05                               | -0.02 $\pm$ 0.05                              |
|        | badq | -240531.52 $\pm$ 0.03                  | -0.04 $\pm$ 0.06                            | -0.04 $\pm$ 0.05                             | -0.05 $\pm$ 0.07                              | -0.03 $\pm$ 0.07                              |
| DEN    |      | -217978.77 $\pm$ 0.04                  | -0.08 $\pm$ 0.09                            | -0.09 $\pm$ 0.06                             | 0.02 $\pm$ 0.09                               | -0.19 $\pm$ 0.10                              |
|        | b    | -217978.52 $\pm$ 0.04                  | -0.12 $\pm$ 0.09                            | -0.10 $\pm$ 0.08                             | -0.11 $\pm$ 0.11                              | -0.14 $\pm$ 0.11                              |
|        | ba   | -218030.92 $\pm$ 0.02                  | -0.05 $\pm$ 0.04                            | -0.04 $\pm$ 0.04                             | -0.04 $\pm$ 0.05                              | -0.03 $\pm$ 0.05                              |

*Continued on next page*

Table 54 – *Continued from previous page*

| Molec. | MM'  | $\Delta G_{\text{TI3}}^{N_\lambda=11}$ | $\Delta\Delta G_{\text{TI}}^{N_\lambda=6}$ | $\Delta\Delta G_{\text{BAR}}^{N_\lambda=6}$ | $\Delta\Delta G_{\text{IEXP}}^{N_\lambda=5}$ | $\Delta\Delta G_{\text{DEXP}}^{N_\lambda=5}$ |
|--------|------|----------------------------------------|--------------------------------------------|---------------------------------------------|----------------------------------------------|----------------------------------------------|
|        | bad  | -218028.84 ± 0.02                      | 0.01 ± 0.04                                | 0.02 ± 0.04                                 | 0.02 ± 0.05                                  | 0.02 ± 0.05                                  |
|        | badq | -218028.61 ± 0.02                      | 0.01 ± 0.04                                | 0.02 ± 0.04                                 | 0.01 ± 0.05                                  | 0.03 ± 0.04                                  |
| IND    |      | -228035.12 ± 0.05                      | -0.06 ± 0.11                               | -0.05 ± 0.09                                | 0.01 ± 0.14                                  | -0.11 ± 0.14                                 |
|        | b    | -228035.94 ± 0.05                      | 0.02 ± 0.12                                | 0.02 ± 0.09                                 | 0.06 ± 0.14                                  | -0.03 ± 0.14                                 |
|        | ba   | -228074.91 ± 0.04                      | -0.11 ± 0.08                               | -0.13 ± 0.07                                | -0.11 ± 0.11                                 | -0.13 ± 0.08                                 |
|        | bad  | -228077.33 ± 0.03                      | 0.03 ± 0.07                                | 0.03 ± 0.06                                 | 0.01 ± 0.09                                  | 0.08 ± 0.07                                  |
|        | badq | -228072.52 ± 0.05                      | 0.04 ± 0.12                                | 0.04 ± 0.10                                 | 0.09 ± 0.16                                  | 0.00 ± 0.16                                  |
| OXE    |      | -194837.98 ± 0.03                      | -0.06 ± 0.07                               | -0.06 ± 0.05                                | -0.08 ± 0.07                                 | -0.05 ± 0.08                                 |
|        | b    | -194838.48 ± 0.02                      | -0.10 ± 0.04                               | -0.11 ± 0.04                                | -0.13 ± 0.05                                 | -0.08 ± 0.05                                 |
|        | ba   | -194846.17 ± 0.02                      | 0.04 ± 0.05                                | 0.04 ± 0.04                                 | 0.03 ± 0.05                                  | 0.04 ± 0.06                                  |
|        | bad  | -194846.38 ± 0.02                      | -0.04 ± 0.05                               | -0.05 ± 0.04                                | -0.05 ± 0.06                                 | -0.05 ± 0.06                                 |
|        | badq | -194844.03 ± 0.03                      | -0.05 ± 0.06                               | -0.05 ± 0.05                                | -0.01 ± 0.07                                 | -0.10 ± 0.08                                 |
| N4B    |      | -244115.50 ± 0.03                      | 0.01 ± 0.07                                | 0.01 ± 0.06                                 | -0.06 ± 0.09                                 | 0.10 ± 0.09                                  |
|        | b    | -244116.16 ± 0.03                      | 0.07 ± 0.07                                | 0.07 ± 0.06                                 | 0.00 ± 0.08                                  | 0.13 ± 0.08                                  |
|        | ba   | -244122.56 ± 0.02                      | -0.03 ± 0.05                               | -0.03 ± 0.04                                | -0.08 ± 0.06                                 | 0.02 ± 0.06                                  |
|        | bad  | -244123.06 ± 0.02                      | 0.11 ± 0.05                                | 0.11 ± 0.05                                 | 0.07 ± 0.07                                  | 0.12 ± 0.07                                  |
|        | badq | -244116.03 ± 0.03                      | 0.06 ± 0.07                                | 0.07 ± 0.06                                 | 0.07 ± 0.08                                  | 0.06 ± 0.08                                  |

Table 55: MM-to-QM bound-state ligand binding free energy correction values 2- $\lambda$  states simulated for 50 ps

| Molec. | MM'  | $\Delta G_{\text{TI3}}^{N_\lambda=11}$ | $\Delta \Delta G_{\text{TI}}^{N_\lambda=2}$ | $\Delta \Delta G_{\text{BAR}}^{N_\lambda=2}$ | $\Delta \Delta G_{\text{IEXP}}^{N_\lambda=1}$ | $\Delta \Delta G_{\text{DEXP}}^{N_\lambda=1}$ |
|--------|------|----------------------------------------|---------------------------------------------|----------------------------------------------|-----------------------------------------------|-----------------------------------------------|
| BNZ    |      | -145560.83 $\pm$ 0.02                  | 0.11 $\pm$ 0.10                             | 0.11 $\pm$ 0.09                              | 0.34 $\pm$ 0.26                               | 0.00 $\pm$ 0.16                               |
|        | b    | -145561.25 $\pm$ 0.01                  | 0.03 $\pm$ 0.06                             | 0.03 $\pm$ 0.06                              | 0.16 $\pm$ 0.14                               | -0.13 $\pm$ 0.15                              |
|        | ba   | -145565.40 $\pm$ 0.01                  | 0.09 $\pm$ 0.04                             | 0.09 $\pm$ 0.05                              | 0.10 $\pm$ 0.11                               | 0.13 $\pm$ 0.08                               |
|        | bad  | -145565.73 $\pm$ 0.01                  | 0.01 $\pm$ 0.05                             | 0.00 $\pm$ 0.05                              | 0.09 $\pm$ 0.10                               | -0.12 $\pm$ 0.09                              |
|        | badq | -145566.51 $\pm$ 0.01                  | 0.03 $\pm$ 0.05                             | 0.03 $\pm$ 0.05                              | 0.08 $\pm$ 0.08                               | -0.07 $\pm$ 0.08                              |
| PXY    |      | -194835.81 $\pm$ 0.03                  | -0.15 $\pm$ 0.13                            | -0.04 $\pm$ 0.15                             | -0.17 $\pm$ 0.20                              | 0.54 $\pm$ 0.12                               |
|        | b    | -194836.45 $\pm$ 0.03                  | -0.07 $\pm$ 0.16                            | -0.12 $\pm$ 0.17                             | 0.38 $\pm$ 0.38                               | -0.60 $\pm$ 0.18                              |
|        | ba   | -194843.36 $\pm$ 0.02                  | -0.03 $\pm$ 0.10                            | 0.01 $\pm$ 0.09                              | -0.14 $\pm$ 0.13                              | 0.17 $\pm$ 0.13                               |
|        | bad  | -194843.43 $\pm$ 0.02                  | -0.23 $\pm$ 0.10                            | -0.21 $\pm$ 0.09                             | -0.24 $\pm$ 0.13                              | -0.17 $\pm$ 0.12                              |
|        | badq | -194848.27 $\pm$ 0.02                  | -0.05 $\pm$ 0.12                            | -0.05 $\pm$ 0.13                             | -0.25 $\pm$ 0.17                              | -0.05 $\pm$ 0.20                              |
| I4B    |      | -244115.72 $\pm$ 0.03                  | 0.05 $\pm$ 0.17                             | 0.12 $\pm$ 0.15                              | -0.08 $\pm$ 0.16                              | -0.24 $\pm$ 0.35                              |
|        | b    | -244116.40 $\pm$ 0.03                  | 0.04 $\pm$ 0.18                             | 0.12 $\pm$ 0.18                              | 0.35 $\pm$ 0.19                               | -1.28 $\pm$ 0.54                              |
|        | ba   | -244120.30 $\pm$ 0.03                  | 0.00 $\pm$ 0.13                             | 0.09 $\pm$ 0.12                              | 0.06 $\pm$ 0.16                               | 0.23 $\pm$ 0.16                               |
|        | bad  | -244120.62 $\pm$ 0.03                  | 0.11 $\pm$ 0.13                             | 0.17 $\pm$ 0.13                              | 0.03 $\pm$ 0.15                               | 0.32 $\pm$ 0.16                               |
|        | badq | -244120.29 $\pm$ 0.03                  | 0.02 $\pm$ 0.13                             | 0.13 $\pm$ 0.16                              | 0.11 $\pm$ 0.20                               | 0.17 $\pm$ 0.38                               |
| BZF    |      | -240489.62 $\pm$ 0.05                  | -0.35 $\pm$ 0.25                            | -0.03 $\pm$ 0.37                             | -0.29 $\pm$ 0.49                              | 0.59 $\pm$ 0.47                               |
|        | b    | -240489.38 $\pm$ 0.05                  | -0.10 $\pm$ 0.25                            | -0.33 $\pm$ 0.38                             | -0.97 $\pm$ 0.41                              | 0.61 $\pm$ 0.30                               |
|        | ba   | -240530.92 $\pm$ 0.02                  | -0.03 $\pm$ 0.12                            | -0.05 $\pm$ 0.11                             | 0.11 $\pm$ 0.19                               | -0.43 $\pm$ 0.23                              |
|        | bad  | -240530.51 $\pm$ 0.02                  | 0.18 $\pm$ 0.11                             | 0.17 $\pm$ 0.11                              | 0.22 $\pm$ 0.17                               | 0.18 $\pm$ 0.17                               |
|        | badq | -240531.52 $\pm$ 0.03                  | 0.33 $\pm$ 0.13                             | 0.35 $\pm$ 0.13                              | 0.19 $\pm$ 0.20                               | 0.54 $\pm$ 0.18                               |
| DEN    |      | -217978.77 $\pm$ 0.04                  | -0.14 $\pm$ 0.21                            | -0.07 $\pm$ 0.20                             | -0.38 $\pm$ 0.22                              | 0.15 $\pm$ 0.26                               |
|        | b    | -217978.52 $\pm$ 0.04                  | 0.00 $\pm$ 0.20                             | -0.09 $\pm$ 0.22                             | -0.52 $\pm$ 0.28                              | 0.07 $\pm$ 0.41                               |
|        | ba   | -218030.92 $\pm$ 0.02                  | 0.12 $\pm$ 0.11                             | 0.13 $\pm$ 0.10                              | 0.02 $\pm$ 0.13                               | 0.18 $\pm$ 0.18                               |

*Continued on next page*

Table 55 – Continued from previous page

| Molec. | MM'  | $\Delta G_{\text{TI3}}^{N_{\lambda}=11}$ | $\Delta\Delta G_{\text{TI}}^{N_{\lambda}=2}$ | $\Delta\Delta G_{\text{BAR}}^{N_{\lambda}=2}$ | $\Delta\Delta G_{\text{IEXP}}^{N_{\lambda}=1}$ | $\Delta\Delta G_{\text{DEXP}}^{N_{\lambda}=1}$ |
|--------|------|------------------------------------------|----------------------------------------------|-----------------------------------------------|------------------------------------------------|------------------------------------------------|
|        | bad  | -218028.84 ± 0.02                        | 0.25 ± 0.11                                  | 0.21 ± 0.11                                   | 0.14 ± 0.18                                    | 0.24 ± 0.14                                    |
|        | badq | -218028.61 ± 0.02                        | 0.33 ± 0.11                                  | 0.28 ± 0.12                                   | 0.18 ± 0.18                                    | 0.47 ± 0.19                                    |
| IND    |      | -228035.12 ± 0.05                        | 0.13 ± 0.26                                  | 0.02 ± 0.39                                   | -1.13 ± 0.25                                   | 0.73 ± 0.49                                    |
|        | b    | -228035.94 ± 0.05                        | 0.81 ± 0.32                                  | 0.24 ± 0.33                                   | 0.27 ± 0.54                                    | 0.76 ± 0.28                                    |
|        | ba   | -228074.91 ± 0.04                        | 1.17 ± 0.36                                  | 0.25 ± 0.20                                   | 0.09 ± 0.25                                    | 0.07 ± 0.26                                    |
|        | bad  | -228077.33 ± 0.03                        | 0.62 ± 0.20                                  | 0.35 ± 0.17                                   | 0.24 ± 0.21                                    | 0.24 ± 0.30                                    |
|        | badq | -228072.52 ± 0.05                        | 0.35 ± 0.22                                  | 0.40 ± 0.45                                   | -1.92 ± 0.35                                   | 2.71 ± 0.33                                    |
| OXE    |      | -194837.98 ± 0.03                        | -0.23 ± 0.14                                 | -0.18 ± 0.15                                  | 0.34 ± 0.49                                    | -0.78 ± 0.49                                   |
|        | b    | -194838.48 ± 0.02                        | -0.12 ± 0.12                                 | -0.06 ± 0.11                                  | -0.21 ± 0.22                                   | 0.12 ± 0.17                                    |
|        | ba   | -194846.17 ± 0.02                        | -0.08 ± 0.11                                 | -0.06 ± 0.14                                  | -0.28 ± 0.18                                   | 0.16 ± 0.21                                    |
|        | bad  | -194846.38 ± 0.02                        | -0.05 ± 0.12                                 | -0.09 ± 0.12                                  | -0.37 ± 0.18                                   | 0.04 ± 0.20                                    |
|        | badq | -194844.03 ± 0.03                        | -0.05 ± 0.14                                 | -0.13 ± 0.12                                  | -0.02 ± 0.38                                   | -0.20 ± 0.19                                   |
| N4B    |      | -244115.50 ± 0.03                        | -0.46 ± 0.20                                 | -0.41 ± 0.21                                  | -0.84 ± 0.27                                   | 0.23 ± 0.20                                    |
|        | b    | -244116.16 ± 0.03                        | -0.20 ± 0.20                                 | 0.02 ± 0.19                                   | -0.53 ± 0.39                                   | 1.05 ± 0.19                                    |
|        | ba   | -244122.56 ± 0.02                        | -0.41 ± 0.18                                 | -0.31 ± 0.14                                  | -0.61 ± 0.17                                   | 0.07 ± 0.17                                    |
|        | bad  | -244123.06 ± 0.02                        | -0.31 ± 0.18                                 | -0.25 ± 0.19                                  | -0.49 ± 0.17                                   | -0.06 ± 0.28                                   |
|        | badq | -244116.03 ± 0.03                        | -0.49 ± 0.20                                 | -0.33 ± 0.14                                  | -0.39 ± 0.22                                   | -1.16 ± 0.48                                   |



Table 56: MM-to-QM bound-state ligand binding free energy correction values 3- $\lambda$  states simulated for 50 ps

| Molec. | MM'  | $\Delta G_{\text{TI3}}^{N_\lambda=11}$ | $\Delta\Delta G_{\text{TI}}^{N_\lambda=3}$ | $\Delta\Delta G_{\text{BAR}}^{N_\lambda=3}$ | $\Delta\Delta G_{\text{IEXP}}^{N_\lambda=2}$ | $\Delta\Delta G_{\text{DEXP}}^{N_\lambda=2}$ |
|--------|------|----------------------------------------|--------------------------------------------|---------------------------------------------|----------------------------------------------|----------------------------------------------|
| BNZ    |      | -145560.83 $\pm$ 0.02                  | -0.03 $\pm$ 0.08                           | 0.00 $\pm$ 0.06                             | 0.03 $\pm$ 0.10                              | -0.05 $\pm$ 0.11                             |
|        | b    | -145561.25 $\pm$ 0.01                  | 0.11 $\pm$ 0.05                            | 0.10 $\pm$ 0.05                             | 0.12 $\pm$ 0.07                              | 0.04 $\pm$ 0.08                              |
|        | ba   | -145565.40 $\pm$ 0.01                  | 0.09 $\pm$ 0.05                            | 0.09 $\pm$ 0.04                             | 0.09 $\pm$ 0.06                              | 0.10 $\pm$ 0.06                              |
|        | bad  | -145565.73 $\pm$ 0.01                  | 0.07 $\pm$ 0.05                            | 0.06 $\pm$ 0.04                             | 0.10 $\pm$ 0.06                              | 0.00 $\pm$ 0.06                              |
|        | badq | -145566.51 $\pm$ 0.01                  | 0.08 $\pm$ 0.05                            | 0.06 $\pm$ 0.04                             | 0.11 $\pm$ 0.06                              | 0.02 $\pm$ 0.06                              |
| PXY    |      | -194835.81 $\pm$ 0.03                  | -0.06 $\pm$ 0.12                           | -0.06 $\pm$ 0.10                            | -0.12 $\pm$ 0.13                             | 0.06 $\pm$ 0.12                              |
|        | b    | -194836.45 $\pm$ 0.03                  | -0.19 $\pm$ 0.12                           | -0.19 $\pm$ 0.09                            | -0.08 $\pm$ 0.19                             | -0.23 $\pm$ 0.12                             |
|        | ba   | -194843.36 $\pm$ 0.02                  | 0.03 $\pm$ 0.09                            | 0.01 $\pm$ 0.07                             | 0.05 $\pm$ 0.12                              | 0.11 $\pm$ 0.08                              |
|        | bad  | -194843.43 $\pm$ 0.02                  | 0.00 $\pm$ 0.11                            | -0.05 $\pm$ 0.08                            | 0.15 $\pm$ 0.30                              | -0.10 $\pm$ 0.13                             |
|        | badq | -194848.27 $\pm$ 0.02                  | 0.00 $\pm$ 0.12                            | 0.00 $\pm$ 0.11                             | 0.01 $\pm$ 0.19                              | -0.03 $\pm$ 0.14                             |
| I4B    |      | -244115.72 $\pm$ 0.03                  | -0.12 $\pm$ 0.16                           | -0.03 $\pm$ 0.11                            | 0.00 $\pm$ 0.15                              | -0.36 $\pm$ 0.21                             |
|        | b    | -244116.40 $\pm$ 0.03                  | 0.07 $\pm$ 0.16                            | 0.08 $\pm$ 0.13                             | 0.40 $\pm$ 0.20                              | -0.37 $\pm$ 0.32                             |
|        | ba   | -244120.30 $\pm$ 0.03                  | -0.05 $\pm$ 0.12                           | -0.04 $\pm$ 0.09                            | 0.08 $\pm$ 0.13                              | -0.01 $\pm$ 0.10                             |
|        | bad  | -244120.62 $\pm$ 0.03                  | -0.06 $\pm$ 0.11                           | -0.02 $\pm$ 0.10                            | -0.06 $\pm$ 0.15                             | 0.06 $\pm$ 0.12                              |
|        | badq | -244120.29 $\pm$ 0.03                  | -0.04 $\pm$ 0.14                           | -0.02 $\pm$ 0.10                            | 0.13 $\pm$ 0.15                              | -0.03 $\pm$ 0.17                             |
| BZF    |      | -240489.62 $\pm$ 0.05                  | -0.03 $\pm$ 0.19                           | -0.07 $\pm$ 0.18                            | -0.23 $\pm$ 0.34                             | 0.39 $\pm$ 0.29                              |
|        | b    | -240489.38 $\pm$ 0.05                  | -0.27 $\pm$ 0.21                           | -0.24 $\pm$ 0.20                            | -0.72 $\pm$ 0.28                             | 0.00 $\pm$ 0.26                              |
|        | ba   | -240530.92 $\pm$ 0.02                  | 0.00 $\pm$ 0.11                            | -0.01 $\pm$ 0.08                            | 0.11 $\pm$ 0.11                              | -0.21 $\pm$ 0.14                             |
|        | bad  | -240530.51 $\pm$ 0.02                  | 0.14 $\pm$ 0.09                            | 0.14 $\pm$ 0.07                             | 0.13 $\pm$ 0.11                              | 0.19 $\pm$ 0.10                              |
|        | badq | -240531.52 $\pm$ 0.03                  | 0.15 $\pm$ 0.10                            | 0.18 $\pm$ 0.10                             | 0.10 $\pm$ 0.17                              | 0.33 $\pm$ 0.13                              |
| DEN    |      | -217978.77 $\pm$ 0.04                  | -0.23 $\pm$ 0.18                           | -0.21 $\pm$ 0.14                            | -0.14 $\pm$ 0.18                             | -0.17 $\pm$ 0.17                             |
|        | b    | -217978.52 $\pm$ 0.04                  | 0.03 $\pm$ 0.18                            | 0.02 $\pm$ 0.15                             | -0.07 $\pm$ 0.20                             | -0.01 $\pm$ 0.23                             |
|        | ba   | -218030.92 $\pm$ 0.02                  | 0.07 $\pm$ 0.10                            | 0.08 $\pm$ 0.07                             | 0.08 $\pm$ 0.10                              | 0.07 $\pm$ 0.10                              |

*Continued on next page*

Table 56 – *Continued from previous page*

| Molec. | MM'  | $\Delta G_{\text{TI3}}^{N_{\lambda}=11}$ | $\Delta\Delta G_{\text{TI}}^{N_{\lambda}=3}$ | $\Delta\Delta G_{\text{BAR}}^{N_{\lambda}=3}$ | $\Delta\Delta G_{\text{IEXP}}^{N_{\lambda}=2}$ | $\Delta\Delta G_{\text{DEXP}}^{N_{\lambda}=2}$ |
|--------|------|------------------------------------------|----------------------------------------------|-----------------------------------------------|------------------------------------------------|------------------------------------------------|
|        | bad  | -218028.84 ± 0.02                        | 0.07 ± 0.08                                  | 0.09 ± 0.07                                   | 0.01 ± 0.10                                    | 0.16 ± 0.09                                    |
|        | badq | -218028.61 ± 0.02                        | 0.06 ± 0.09                                  | 0.10 ± 0.08                                   | 0.00 ± 0.11                                    | 0.21 ± 0.11                                    |
| IND    |      | -228035.12 ± 0.05                        | 0.09 ± 0.24                                  | 0.13 ± 0.20                                   | -0.27 ± 0.21                                   | 0.05 ± 0.32                                    |
|        | b    | -228035.94 ± 0.05                        | -0.03 ± 0.24                                 | -0.06 ± 0.20                                  | -0.03 ± 0.33                                   | -0.01 ± 0.25                                   |
|        | ba   | -228074.91 ± 0.04                        | 0.19 ± 0.21                                  | 0.02 ± 0.16                                   | 0.34 ± 0.19                                    | -0.27 ± 0.28                                   |
|        | bad  | -228077.33 ± 0.03                        | 0.11 ± 0.14                                  | 0.10 ± 0.12                                   | 0.07 ± 0.19                                    | 0.09 ± 0.20                                    |
|        | badq | -228072.52 ± 0.05                        | 0.17 ± 0.21                                  | 0.15 ± 0.20                                   | -0.65 ± 0.28                                   | 1.15 ± 0.21                                    |
| OXE    |      | -194837.98 ± 0.03                        | -0.22 ± 0.11                                 | -0.20 ± 0.09                                  | -0.21 ± 0.21                                   | -0.21 ± 0.21                                   |
|        | b    | -194838.48 ± 0.02                        | -0.11 ± 0.12                                 | -0.08 ± 0.09                                  | -0.07 ± 0.12                                   | -0.15 ± 0.16                                   |
|        | ba   | -194846.17 ± 0.02                        | 0.04 ± 0.10                                  | 0.02 ± 0.09                                   | -0.04 ± 0.12                                   | 0.11 ± 0.13                                    |
|        | bad  | -194846.38 ± 0.02                        | -0.10 ± 0.11                                 | -0.09 ± 0.08                                  | -0.16 ± 0.12                                   | -0.05 ± 0.12                                   |
|        | badq | -194844.03 ± 0.03                        | -0.01 ± 0.12                                 | 0.00 ± 0.10                                   | -0.02 ± 0.16                                   | -0.18 ± 0.17                                   |
| N4B    |      | -244115.50 ± 0.03                        | -0.51 ± 0.16                                 | -0.47 ± 0.11                                  | -0.38 ± 0.32                                   | -0.27 ± 0.18                                   |
|        | b    | -244116.16 ± 0.03                        | -0.07 ± 0.14                                 | -0.06 ± 0.11                                  | -0.24 ± 0.20                                   | 0.42 ± 0.11                                    |
|        | ba   | -244122.56 ± 0.02                        | -0.24 ± 0.12                                 | -0.22 ± 0.08                                  | -0.35 ± 0.12                                   | -0.09 ± 0.13                                   |
|        | bad  | -244123.06 ± 0.02                        | -0.17 ± 0.13                                 | -0.15 ± 0.11                                  | -0.20 ± 0.14                                   | -0.11 ± 0.18                                   |
|        | badq | -244116.03 ± 0.03                        | -0.13 ± 0.13                                 | -0.13 ± 0.11                                  | -0.14 ± 0.17                                   | -0.31 ± 0.26                                   |

Table 57: MM-to-QM bound-state ligand binding free energy correction values 6- $\lambda$  states simulated for 50 ps

| Molec. | MM'  | $\Delta G_{\text{TI3}}^{N_\lambda=11}$ | $\Delta\Delta G_{\text{TI}}^{N_\lambda=6}$ | $\Delta\Delta G_{\text{BAR}}^{N_\lambda=6}$ | $\Delta\Delta G_{\text{IEXP}}^{N_\lambda=5}$ | $\Delta\Delta G_{\text{DEXP}}^{N_\lambda=5}$ |
|--------|------|----------------------------------------|--------------------------------------------|---------------------------------------------|----------------------------------------------|----------------------------------------------|
| BNZ    |      | -145560.83 $\pm$ 0.02                  | 0.02 $\pm$ 0.06                            | 0.02 $\pm$ 0.05                             | 0.04 $\pm$ 0.07                              | 0.00 $\pm$ 0.06                              |
|        | b    | -145561.25 $\pm$ 0.01                  | 0.03 $\pm$ 0.04                            | 0.03 $\pm$ 0.03                             | 0.04 $\pm$ 0.04                              | 0.01 $\pm$ 0.04                              |
|        | ba   | -145565.40 $\pm$ 0.01                  | 0.04 $\pm$ 0.04                            | 0.04 $\pm$ 0.03                             | 0.05 $\pm$ 0.04                              | 0.04 $\pm$ 0.04                              |
|        | bad  | -145565.73 $\pm$ 0.01                  | 0.01 $\pm$ 0.03                            | 0.01 $\pm$ 0.02                             | 0.03 $\pm$ 0.04                              | -0.02 $\pm$ 0.04                             |
|        | badq | -145566.51 $\pm$ 0.01                  | 0.14 $\pm$ 0.03                            | 0.14 $\pm$ 0.03                             | 0.16 $\pm$ 0.04                              | 0.12 $\pm$ 0.04                              |
| PXY    |      | -194835.81 $\pm$ 0.03                  | 0.04 $\pm$ 0.09                            | 0.04 $\pm$ 0.07                             | 0.01 $\pm$ 0.09                              | 0.07 $\pm$ 0.09                              |
|        | b    | -194836.45 $\pm$ 0.03                  | -0.02 $\pm$ 0.09                           | -0.04 $\pm$ 0.07                            | -0.05 $\pm$ 0.09                             | -0.02 $\pm$ 0.09                             |
|        | ba   | -194843.36 $\pm$ 0.02                  | 0.08 $\pm$ 0.06                            | 0.08 $\pm$ 0.04                             | 0.06 $\pm$ 0.06                              | 0.10 $\pm$ 0.06                              |
|        | bad  | -194843.43 $\pm$ 0.02                  | -0.04 $\pm$ 0.06                           | -0.05 $\pm$ 0.04                            | -0.03 $\pm$ 0.07                             | -0.06 $\pm$ 0.06                             |
|        | badq | -194848.27 $\pm$ 0.02                  | 0.04 $\pm$ 0.07                            | 0.03 $\pm$ 0.06                             | 0.02 $\pm$ 0.08                              | 0.04 $\pm$ 0.08                              |
| I4B    |      | -244115.72 $\pm$ 0.03                  | -0.09 $\pm$ 0.10                           | -0.08 $\pm$ 0.08                            | -0.01 $\pm$ 0.10                             | -0.16 $\pm$ 0.11                             |
|        | b    | -244116.40 $\pm$ 0.03                  | -0.02 $\pm$ 0.09                           | -0.01 $\pm$ 0.08                            | 0.04 $\pm$ 0.10                              | -0.11 $\pm$ 0.12                             |
|        | ba   | -244120.30 $\pm$ 0.03                  | -0.06 $\pm$ 0.09                           | -0.05 $\pm$ 0.07                            | 0.00 $\pm$ 0.09                              | -0.13 $\pm$ 0.10                             |
|        | bad  | -244120.62 $\pm$ 0.03                  | -0.05 $\pm$ 0.09                           | -0.05 $\pm$ 0.07                            | -0.03 $\pm$ 0.09                             | -0.07 $\pm$ 0.10                             |
|        | badq | -244120.29 $\pm$ 0.03                  | -0.04 $\pm$ 0.09                           | -0.02 $\pm$ 0.08                            | 0.03 $\pm$ 0.10                              | -0.07 $\pm$ 0.11                             |
| BZF    |      | -240489.62 $\pm$ 0.05                  | -0.11 $\pm$ 0.13                           | -0.12 $\pm$ 0.11                            | -0.24 $\pm$ 0.17                             | 0.11 $\pm$ 0.14                              |
|        | b    | -240489.38 $\pm$ 0.05                  | -0.28 $\pm$ 0.14                           | -0.27 $\pm$ 0.11                            | -0.41 $\pm$ 0.17                             | -0.17 $\pm$ 0.16                             |
|        | ba   | -240530.92 $\pm$ 0.02                  | 0.05 $\pm$ 0.07                            | 0.05 $\pm$ 0.05                             | 0.08 $\pm$ 0.07                              | 0.00 $\pm$ 0.07                              |
|        | bad  | -240530.51 $\pm$ 0.02                  | 0.15 $\pm$ 0.07                            | 0.15 $\pm$ 0.05                             | 0.18 $\pm$ 0.07                              | 0.14 $\pm$ 0.07                              |
|        | badq | -240531.52 $\pm$ 0.03                  | 0.28 $\pm$ 0.09                            | 0.28 $\pm$ 0.07                             | 0.29 $\pm$ 0.09                              | 0.28 $\pm$ 0.09                              |
| DEN    |      | -217978.77 $\pm$ 0.04                  | 0.02 $\pm$ 0.13                            | 0.02 $\pm$ 0.10                             | 0.10 $\pm$ 0.13                              | -0.07 $\pm$ 0.13                             |
|        | b    | -217978.52 $\pm$ 0.04                  | -0.08 $\pm$ 0.12                           | -0.08 $\pm$ 0.09                            | -0.11 $\pm$ 0.12                             | -0.15 $\pm$ 0.15                             |
|        | ba   | -218030.92 $\pm$ 0.02                  | 0.10 $\pm$ 0.06                            | 0.10 $\pm$ 0.04                             | 0.08 $\pm$ 0.06                              | 0.11 $\pm$ 0.06                              |

*Continued on next page*

Table 57 – Continued from previous page

| Molec. | MM'  | $\Delta G_{\text{TI3}}^{N_{\lambda}=11}$ | $\Delta\Delta G_{\text{TI}}^{N_{\lambda}=6}$ | $\Delta\Delta G_{\text{BAR}}^{N_{\lambda}=6}$ | $\Delta\Delta G_{\text{IEXP}}^{N_{\lambda}=5}$ | $\Delta\Delta G_{\text{DEXP}}^{N_{\lambda}=5}$ |
|--------|------|------------------------------------------|----------------------------------------------|-----------------------------------------------|------------------------------------------------|------------------------------------------------|
|        | bad  | -218028.84 ± 0.02                        | 0.14 ± 0.06                                  | 0.14 ± 0.05                                   | 0.13 ± 0.07                                    | 0.16 ± 0.06                                    |
|        | badq | -218028.61 ± 0.02                        | 0.11 ± 0.06                                  | 0.12 ± 0.05                                   | 0.09 ± 0.07                                    | 0.14 ± 0.07                                    |
| IND    |      | -228035.12 ± 0.05                        | 0.10 ± 0.16                                  | 0.10 ± 0.13                                   | 0.16 ± 0.19                                    | -0.04 ± 0.18                                   |
|        | b    | -228035.94 ± 0.05                        | 0.31 ± 0.17                                  | 0.30 ± 0.13                                   | 0.35 ± 0.18                                    | 0.16 ± 0.18                                    |
|        | ba   | -228074.91 ± 0.04                        | -0.01 ± 0.13                                 | -0.06 ± 0.10                                  | 0.01 ± 0.16                                    | -0.10 ± 0.12                                   |
|        | bad  | -228077.33 ± 0.03                        | 0.17 ± 0.09                                  | 0.16 ± 0.08                                   | 0.22 ± 0.14                                    | 0.16 ± 0.10                                    |
|        | badq | -228072.52 ± 0.05                        | -0.07 ± 0.16                                 | -0.06 ± 0.12                                  | -0.16 ± 0.19                                   | 0.12 ± 0.16                                    |
| OXE    |      | -194837.98 ± 0.03                        | -0.15 ± 0.08                                 | -0.16 ± 0.07                                  | -0.19 ± 0.09                                   | -0.12 ± 0.09                                   |
|        | b    | -194838.48 ± 0.02                        | -0.16 ± 0.07                                 | -0.16 ± 0.05                                  | -0.16 ± 0.07                                   | -0.15 ± 0.07                                   |
|        | ba   | -194846.17 ± 0.02                        | 0.03 ± 0.07                                  | 0.03 ± 0.05                                   | 0.02 ± 0.07                                    | 0.03 ± 0.08                                    |
|        | bad  | -194846.38 ± 0.02                        | -0.04 ± 0.07                                 | -0.04 ± 0.05                                  | -0.07 ± 0.07                                   | -0.02 ± 0.08                                   |
|        | badq | -194844.03 ± 0.03                        | -0.12 ± 0.09                                 | -0.11 ± 0.08                                  | -0.06 ± 0.12                                   | -0.24 ± 0.12                                   |
| N4B    |      | -244115.50 ± 0.03                        | -0.19 ± 0.09                                 | -0.19 ± 0.07                                  | -0.34 ± 0.09                                   | -0.03 ± 0.09                                   |
|        | b    | -244116.16 ± 0.03                        | 0.13 ± 0.10                                  | 0.14 ± 0.09                                   | 0.07 ± 0.11                                    | 0.21 ± 0.11                                    |
|        | ba   | -244122.56 ± 0.02                        | -0.21 ± 0.07                                 | -0.21 ± 0.05                                  | -0.28 ± 0.07                                   | -0.16 ± 0.08                                   |
|        | bad  | -244123.06 ± 0.02                        | -0.01 ± 0.08                                 | -0.01 ± 0.06                                  | -0.03 ± 0.08                                   | 0.01 ± 0.10                                    |
|        | badq | -244116.03 ± 0.03                        | 0.01 ± 0.09                                  | 0.01 ± 0.07                                   | 0.03 ± 0.09                                    | 0.00 ± 0.09                                    |

Table 58: MM-to-QM bound-state ligand binding free energy correction values 2- $\lambda$  states simulated for 20 ps

| Molec. | MM'  | $\Delta G_{\text{TI3}}^{N_\lambda=11}$ | $\Delta\Delta G_{\text{TI}}^{N_\lambda=2}$ | $\Delta\Delta G_{\text{BAR}}^{N_\lambda=2}$ | $\Delta\Delta G_{\text{IEXP}}^{N_\lambda=1}$ | $\Delta\Delta G_{\text{DEXP}}^{N_\lambda=1}$ |
|--------|------|----------------------------------------|--------------------------------------------|---------------------------------------------|----------------------------------------------|----------------------------------------------|
| BNZ    |      | -145560.83 $\pm$ 0.02                  | -0.03 $\pm$ 0.21                           | -0.02 $\pm$ 0.18                            | 0.17 $\pm$ 0.37                              | 0.01 $\pm$ 0.25                              |
|        | b    | -145561.25 $\pm$ 0.01                  | -0.10 $\pm$ 0.17                           | -0.03 $\pm$ 0.13                            | 0.10 $\pm$ 0.19                              | -0.25 $\pm$ 0.24                             |
|        | ba   | -145565.40 $\pm$ 0.01                  | 0.01 $\pm$ 0.13                            | 0.06 $\pm$ 0.11                             | 0.00 $\pm$ 0.14                              | 0.19 $\pm$ 0.10                              |
|        | bad  | -145565.73 $\pm$ 0.01                  | -0.02 $\pm$ 0.11                           | 0.02 $\pm$ 0.10                             | -0.02 $\pm$ 0.13                             | 0.18 $\pm$ 0.07                              |
|        | badq | -145566.51 $\pm$ 0.01                  | 0.10 $\pm$ 0.13                            | 0.13 $\pm$ 0.12                             | 0.04 $\pm$ 0.12                              | 0.23 $\pm$ 0.14                              |
| PXY    |      | -194835.81 $\pm$ 0.03                  | 0.47 $\pm$ 0.27                            | 0.58 $\pm$ 0.34                             | 0.42 $\pm$ 0.36                              | 0.11 $\pm$ 0.52                              |
|        | b    | -194836.45 $\pm$ 0.03                  | 0.33 $\pm$ 0.23                            | 0.43 $\pm$ 0.23                             | -0.07 $\pm$ 0.18                             | 0.81 $\pm$ 0.24                              |
|        | ba   | -194843.36 $\pm$ 0.02                  | 0.47 $\pm$ 0.18                            | 0.43 $\pm$ 0.16                             | 1.37 $\pm$ 0.51                              | 0.67 $\pm$ 0.14                              |
|        | bad  | -194843.43 $\pm$ 0.02                  | 0.29 $\pm$ 0.19                            | 0.23 $\pm$ 0.16                             | 1.25 $\pm$ 0.51                              | 0.23 $\pm$ 0.23                              |
|        | badq | -194848.27 $\pm$ 0.02                  | 0.22 $\pm$ 0.23                            | 0.14 $\pm$ 0.22                             | 0.79 $\pm$ 0.46                              | 0.27 $\pm$ 0.26                              |
| I4B    |      | -244115.72 $\pm$ 0.03                  | -0.50 $\pm$ 0.32                           | -0.29 $\pm$ 0.34                            | 0.45 $\pm$ 0.53                              | 0.09 $\pm$ 0.28                              |
|        | b    | -244116.40 $\pm$ 0.03                  | -0.09 $\pm$ 0.32                           | 0.10 $\pm$ 0.46                             | -0.35 $\pm$ 0.43                             | -0.58 $\pm$ 0.39                             |
|        | ba   | -244120.30 $\pm$ 0.03                  | -0.15 $\pm$ 0.24                           | -0.11 $\pm$ 0.31                            | -0.53 $\pm$ 0.33                             | 0.08 $\pm$ 0.29                              |
|        | bad  | -244120.62 $\pm$ 0.03                  | 0.06 $\pm$ 0.27                            | 0.01 $\pm$ 0.28                             | -0.46 $\pm$ 0.24                             | 0.29 $\pm$ 0.30                              |
|        | badq | -244120.29 $\pm$ 0.03                  | 0.20 $\pm$ 0.28                            | -0.03 $\pm$ 0.31                            | -0.70 $\pm$ 0.21                             | 0.35 $\pm$ 0.27                              |
| BZF    |      | -240489.62 $\pm$ 0.05                  | -0.46 $\pm$ 0.37                           | 0.25 $\pm$ 0.48                             | -1.18 $\pm$ 0.47                             | 1.90 $\pm$ 0.23                              |
|        | b    | -240489.38 $\pm$ 0.05                  | -0.07 $\pm$ 0.48                           | -0.89 $\pm$ 0.56                            | -1.86 $\pm$ 0.43                             | -0.13 $\pm$ 0.50                             |
|        | ba   | -240530.92 $\pm$ 0.02                  | -0.02 $\pm$ 0.20                           | -0.06 $\pm$ 0.24                            | -0.66 $\pm$ 0.20                             | 0.46 $\pm$ 0.23                              |
|        | bad  | -240530.51 $\pm$ 0.02                  | 0.13 $\pm$ 0.22                            | 0.01 $\pm$ 0.24                             | -0.52 $\pm$ 0.22                             | 0.48 $\pm$ 0.22                              |
|        | badq | -240531.52 $\pm$ 0.03                  | 0.37 $\pm$ 0.28                            | 0.30 $\pm$ 0.33                             | -0.38 $\pm$ 0.26                             | 0.58 $\pm$ 0.39                              |
| DEN    |      | -217978.77 $\pm$ 0.04                  | -0.02 $\pm$ 0.32                           | 0.04 $\pm$ 0.31                             | 0.27 $\pm$ 0.44                              | 0.19 $\pm$ 0.32                              |
|        | b    | -217978.52 $\pm$ 0.04                  | 0.57 $\pm$ 0.39                            | 0.37 $\pm$ 0.37                             | -0.67 $\pm$ 0.26                             | 1.22 $\pm$ 0.34                              |
|        | ba   | -218030.92 $\pm$ 0.02                  | -0.18 $\pm$ 0.15                           | -0.12 $\pm$ 0.20                            | -0.30 $\pm$ 0.23                             | 0.18 $\pm$ 0.19                              |

*Continued on next page*

Table 58 – *Continued from previous page*

| Molec. | MM'  | $\Delta G_{\text{TI3}}^{N_{\lambda}=11}$ | $\Delta\Delta G_{\text{TI}}^{N_{\lambda}=2}$ | $\Delta\Delta G_{\text{BAR}}^{N_{\lambda}=2}$ | $\Delta\Delta G_{\text{IEXP}}^{N_{\lambda}=1}$ | $\Delta\Delta G_{\text{DEXP}}^{N_{\lambda}=1}$ |
|--------|------|------------------------------------------|----------------------------------------------|-----------------------------------------------|------------------------------------------------|------------------------------------------------|
|        | bad  | -218028.84 ± 0.02                        | -0.27 ± 0.18                                 | -0.29 ± 0.17                                  | -0.35 ± 0.17                                   | -0.28 ± 0.21                                   |
|        | badq | -218028.61 ± 0.02                        | -0.28 ± 0.16                                 | -0.28 ± 0.15                                  | -0.27 ± 0.16                                   | -0.31 ± 0.15                                   |
| IND    |      | -228035.12 ± 0.05                        | 0.45 ± 0.58                                  | 0.54 ± 0.70                                   | -0.51 ± 0.51                                   | 1.29 ± 0.55                                    |
|        | b    | -228035.94 ± 0.05                        | 0.52 ± 0.54                                  | 0.59 ± 0.68                                   | -1.27 ± 0.50                                   | 2.43 ± 0.51                                    |
|        | ba   | -228074.91 ± 0.04                        | 0.44 ± 0.47                                  | -0.23 ± 0.31                                  | 1.82 ± 0.54                                    | -0.46 ± 0.39                                   |
|        | bad  | -228077.33 ± 0.03                        | 0.56 ± 0.29                                  | 0.41 ± 0.30                                   | 1.92 ± 0.54                                    | 0.90 ± 0.22                                    |
|        | badq | -228072.52 ± 0.05                        | 0.40 ± 0.47                                  | 0.37 ± 0.71                                   | -0.73 ± 0.54                                   | 1.48 ± 0.54                                    |
| OXE    |      | -194837.98 ± 0.03                        | -0.28 ± 0.28                                 | -0.30 ± 0.37                                  | -1.28 ± 0.29                                   | 0.61 ± 0.35                                    |
|        | b    | -194838.48 ± 0.02                        | -0.23 ± 0.27                                 | 0.01 ± 0.23                                   | -0.76 ± 0.20                                   | 0.73 ± 0.24                                    |
|        | ba   | -194846.17 ± 0.02                        | -0.15 ± 0.25                                 | 0.05 ± 0.24                                   | -0.89 ± 0.17                                   | 0.87 ± 0.27                                    |
|        | bad  | -194846.38 ± 0.02                        | -0.22 ± 0.24                                 | 0.03 ± 0.20                                   | -0.96 ± 0.17                                   | 1.03 ± 0.16                                    |
|        | badq | -194844.03 ± 0.03                        | -0.03 ± 0.32                                 | 0.05 ± 0.23                                   | -0.83 ± 0.13                                   | 0.69 ± 0.32                                    |
| N4B    |      | -244115.50 ± 0.03                        | -0.28 ± 0.23                                 | -0.48 ± 0.31                                  | -1.49 ± 0.18                                   | 0.28 ± 0.32                                    |
|        | b    | -244116.16 ± 0.03                        | -0.19 ± 0.24                                 | -0.20 ± 0.35                                  | -0.74 ± 0.43                                   | 0.57 ± 0.34                                    |
|        | ba   | -244122.56 ± 0.02                        | -0.20 ± 0.21                                 | -0.31 ± 0.22                                  | -0.98 ± 0.19                                   | 0.33 ± 0.19                                    |
|        | bad  | -244123.06 ± 0.02                        | -0.34 ± 0.20                                 | -0.42 ± 0.19                                  | -0.89 ± 0.19                                   | 0.06 ± 0.18                                    |
|        | badq | -244116.03 ± 0.03                        | -0.46 ± 0.26                                 | -0.54 ± 0.26                                  | -1.37 ± 0.19                                   | 0.19 ± 0.27                                    |

Table 59: MM-to-QM bound-state ligand binding free energy correction values 3- $\lambda$  states simulated for 20 ps

| Molec. | MM'  | $\Delta G_{\text{TI}3}^{N_\lambda=11}$ | $\Delta\Delta G_{\text{TI}}^{N_\lambda=3}$ | $\Delta\Delta G_{\text{BAR}}^{N_\lambda=3}$ | $\Delta\Delta G_{\text{IEXP}}^{N_\lambda=2}$ | $\Delta\Delta G_{\text{DEXP}}^{N_\lambda=2}$ |
|--------|------|----------------------------------------|--------------------------------------------|---------------------------------------------|----------------------------------------------|----------------------------------------------|
| BNZ    |      | -145560.83 $\pm$ 0.02                  | 0.17 $\pm$ 0.16                            | 0.14 $\pm$ 0.13                             | 0.15 $\pm$ 0.20                              | 0.17 $\pm$ 0.17                              |
|        | b    | -145561.25 $\pm$ 0.01                  | -0.09 $\pm$ 0.10                           | -0.08 $\pm$ 0.09                            | -0.04 $\pm$ 0.12                             | -0.11 $\pm$ 0.13                             |
|        | ba   | -145565.40 $\pm$ 0.01                  | -0.02 $\pm$ 0.09                           | -0.01 $\pm$ 0.08                            | -0.04 $\pm$ 0.10                             | 0.07 $\pm$ 0.08                              |
|        | bad  | -145565.73 $\pm$ 0.01                  | -0.08 $\pm$ 0.10                           | -0.06 $\pm$ 0.08                            | -0.06 $\pm$ 0.11                             | 0.00 $\pm$ 0.08                              |
|        | badq | -145566.51 $\pm$ 0.01                  | 0.08 $\pm$ 0.12                            | 0.09 $\pm$ 0.09                             | 0.06 $\pm$ 0.11                              | 0.13 $\pm$ 0.12                              |
| PXY    |      | -194835.81 $\pm$ 0.03                  | 0.28 $\pm$ 0.26                            | 0.33 $\pm$ 0.19                             | 0.32 $\pm$ 0.27                              | 0.26 $\pm$ 0.34                              |
|        | b    | -194836.45 $\pm$ 0.03                  | 0.13 $\pm$ 0.21                            | 0.19 $\pm$ 0.15                             | 0.05 $\pm$ 0.22                              | 0.35 $\pm$ 0.25                              |
|        | ba   | -194843.36 $\pm$ 0.02                  | 0.16 $\pm$ 0.14                            | 0.21 $\pm$ 0.10                             | 0.39 $\pm$ 0.28                              | 0.29 $\pm$ 0.13                              |
|        | bad  | -194843.43 $\pm$ 0.02                  | -0.05 $\pm$ 0.17                           | -0.01 $\pm$ 0.12                            | 0.28 $\pm$ 0.30                              | -0.02 $\pm$ 0.15                             |
|        | badq | -194848.27 $\pm$ 0.02                  | -0.13 $\pm$ 0.15                           | -0.09 $\pm$ 0.13                            | -0.01 $\pm$ 0.26                             | 0.01 $\pm$ 0.17                              |
| I4B    |      | -244115.72 $\pm$ 0.03                  | -0.19 $\pm$ 0.37                           | -0.28 $\pm$ 0.25                            | 0.37 $\pm$ 0.48                              | -0.34 $\pm$ 0.22                             |
|        | b    | -244116.40 $\pm$ 0.03                  | -0.07 $\pm$ 0.21                           | -0.02 $\pm$ 0.23                            | -0.24 $\pm$ 0.34                             | -0.09 $\pm$ 0.25                             |
|        | ba   | -244120.30 $\pm$ 0.03                  | -0.14 $\pm$ 0.19                           | -0.13 $\pm$ 0.19                            | -0.27 $\pm$ 0.27                             | 0.01 $\pm$ 0.19                              |
|        | bad  | -244120.62 $\pm$ 0.03                  | -0.10 $\pm$ 0.17                           | -0.08 $\pm$ 0.17                            | -0.36 $\pm$ 0.19                             | 0.13 $\pm$ 0.20                              |
|        | badq | -244120.29 $\pm$ 0.03                  | 0.09 $\pm$ 0.21                            | 0.07 $\pm$ 0.19                             | -0.23 $\pm$ 0.20                             | 0.23 $\pm$ 0.23                              |
| BZF    |      | -240489.62 $\pm$ 0.05                  | -0.31 $\pm$ 0.38                           | -0.30 $\pm$ 0.31                            | -0.56 $\pm$ 0.44                             | 0.26 $\pm$ 0.40                              |
|        | b    | -240489.38 $\pm$ 0.05                  | 0.58 $\pm$ 0.41                            | 0.45 $\pm$ 0.42                             | 0.03 $\pm$ 0.56                              | 0.45 $\pm$ 0.49                              |
|        | ba   | -240530.92 $\pm$ 0.02                  | 0.11 $\pm$ 0.16                            | 0.07 $\pm$ 0.13                             | -0.23 $\pm$ 0.16                             | 0.36 $\pm$ 0.16                              |
|        | bad  | -240530.51 $\pm$ 0.02                  | 0.21 $\pm$ 0.22                            | 0.16 $\pm$ 0.16                             | 0.02 $\pm$ 0.23                              | 0.32 $\pm$ 0.19                              |
|        | badq | -240531.52 $\pm$ 0.03                  | 0.26 $\pm$ 0.22                            | 0.27 $\pm$ 0.18                             | 0.01 $\pm$ 0.23                              | 0.47 $\pm$ 0.24                              |
| DEN    |      | -217978.77 $\pm$ 0.04                  | 0.16 $\pm$ 0.36                            | 0.10 $\pm$ 0.23                             | 0.53 $\pm$ 0.36                              | -0.10 $\pm$ 0.35                             |
|        | b    | -217978.52 $\pm$ 0.04                  | 0.27 $\pm$ 0.35                            | 0.31 $\pm$ 0.28                             | 0.03 $\pm$ 0.31                              | 0.41 $\pm$ 0.35                              |
|        | ba   | -218030.92 $\pm$ 0.02                  | -0.06 $\pm$ 0.16                           | -0.07 $\pm$ 0.13                            | -0.12 $\pm$ 0.18                             | 0.03 $\pm$ 0.15                              |

*Continued on next page*

Table 59 – Continued from previous page

| Molec. | MM'  | $\Delta G_{\text{TI3}}^{N_i=11}$ | $\Delta\Delta G_{\text{TI}}^{N_i=3}$ | $\Delta\Delta G_{\text{BAR}}^{N_i=3}$ | $\Delta\Delta G_{\text{IEXP}}^{N_i=2}$ | $\Delta\Delta G_{\text{DEXP}}^{N_i=2}$ |
|--------|------|----------------------------------|--------------------------------------|---------------------------------------|----------------------------------------|----------------------------------------|
|        | bad  | -218028.84 ± 0.02                | -0.22 ± 0.17                         | -0.24 ± 0.13                          | -0.20 ± 0.20                           | -0.24 ± 0.15                           |
|        | badq | -218028.61 ± 0.02                | -0.15 ± 0.14                         | -0.17 ± 0.11                          | -0.16 ± 0.14                           | -0.21 ± 0.14                           |
| IND    |      | -228035.12 ± 0.05                | 0.40 ± 0.36                          | 0.60 ± 0.46                           | -0.13 ± 0.45                           | 0.91 ± 0.64                            |
|        | b    | -228035.94 ± 0.05                | 0.04 ± 0.33                          | 0.12 ± 0.36                           | -0.87 ± 0.39                           | 1.16 ± 0.43                            |
|        | ba   | -228074.91 ± 0.04                | 0.13 ± 0.30                          | -0.02 ± 0.23                          | 0.70 ± 0.54                            | -0.20 ± 0.28                           |
|        | bad  | -228077.33 ± 0.03                | 0.28 ± 0.21                          | 0.28 ± 0.17                           | 0.65 ± 0.47                            | 0.49 ± 0.19                            |
|        | badq | -228072.52 ± 0.05                | 0.17 ± 0.46                          | 0.15 ± 0.35                           | 0.67 ± 0.64                            | 0.72 ± 0.45                            |
| OXE    |      | -194837.98 ± 0.03                | -0.14 ± 0.28                         | -0.16 ± 0.23                          | -0.47 ± 0.31                           | 0.16 ± 0.28                            |
|        | b    | -194838.48 ± 0.02                | 0.20 ± 0.22                          | 0.18 ± 0.16                           | -0.08 ± 0.19                           | 0.52 ± 0.18                            |
|        | ba   | -194846.17 ± 0.02                | 0.17 ± 0.19                          | 0.16 ± 0.16                           | -0.21 ± 0.18                           | 0.60 ± 0.20                            |
|        | bad  | -194846.38 ± 0.02                | 0.31 ± 0.15                          | 0.27 ± 0.12                           | -0.17 ± 0.15                           | 0.80 ± 0.11                            |
|        | badq | -194844.03 ± 0.03                | 0.26 ± 0.27                          | 0.30 ± 0.18                           | -0.04 ± 0.17                           | 0.30 ± 0.35                            |
| N4B    |      | -244115.50 ± 0.03                | -0.14 ± 0.25                         | -0.16 ± 0.19                          | -0.61 ± 0.18                           | 0.06 ± 0.27                            |
|        | b    | -244116.16 ± 0.03                | 0.27 ± 0.22                          | 0.19 ± 0.19                           | -0.20 ± 0.24                           | 0.43 ± 0.32                            |
|        | ba   | -244122.56 ± 0.02                | -0.46 ± 0.23                         | -0.43 ± 0.18                          | -0.62 ± 0.26                           | -0.23 ± 0.19                           |
|        | bad  | -244123.06 ± 0.02                | -0.22 ± 0.20                         | -0.25 ± 0.14                          | -0.44 ± 0.16                           | -0.17 ± 0.22                           |
|        | badq | -244116.03 ± 0.03                | -0.22 ± 0.23                         | -0.28 ± 0.18                          | -0.64 ± 0.17                           | -0.02 ± 0.23                           |



Table 60: MM-to-QM bound-state ligand binding free energy correction values 6- $\lambda$  states simulated for 20 ps

| Molec. | MM'  | $\Delta G_{\text{TI3}}^{N_\lambda=11}$ | $\Delta \Delta G_{\text{TI}}^{N_\lambda=6}$ | $\Delta \Delta G_{\text{BAR}}^{N_\lambda=6}$ | $\Delta \Delta G_{\text{IEXP}}^{N_\lambda=5}$ | $\Delta \Delta G_{\text{DEXP}}^{N_\lambda=5}$ |
|--------|------|----------------------------------------|---------------------------------------------|----------------------------------------------|-----------------------------------------------|-----------------------------------------------|
| BNZ    |      | -145560.83 $\pm$ 0.02                  | -0.05 $\pm$ 0.14                            | -0.05 $\pm$ 0.10                             | 0.00 $\pm$ 0.15                               | -0.09 $\pm$ 0.15                              |
|        | b    | -145561.25 $\pm$ 0.01                  | -0.12 $\pm$ 0.08                            | -0.12 $\pm$ 0.06                             | -0.10 $\pm$ 0.08                              | -0.13 $\pm$ 0.08                              |
|        | ba   | -145565.40 $\pm$ 0.01                  | 0.06 $\pm$ 0.06                             | 0.05 $\pm$ 0.05                              | 0.04 $\pm$ 0.08                               | 0.08 $\pm$ 0.06                               |
|        | bad  | -145565.73 $\pm$ 0.01                  | 0.00 $\pm$ 0.07                             | 0.00 $\pm$ 0.05                              | 0.00 $\pm$ 0.07                               | 0.01 $\pm$ 0.07                               |
|        | badq | -145566.51 $\pm$ 0.01                  | 0.12 $\pm$ 0.06                             | 0.11 $\pm$ 0.05                              | 0.09 $\pm$ 0.07                               | 0.14 $\pm$ 0.07                               |
| PXY    |      | -194835.81 $\pm$ 0.03                  | 0.24 $\pm$ 0.18                             | 0.26 $\pm$ 0.12                              | 0.26 $\pm$ 0.16                               | 0.19 $\pm$ 0.20                               |
|        | b    | -194836.45 $\pm$ 0.03                  | 0.19 $\pm$ 0.13                             | 0.20 $\pm$ 0.09                              | 0.13 $\pm$ 0.12                               | 0.27 $\pm$ 0.13                               |
|        | ba   | -194843.36 $\pm$ 0.02                  | 0.19 $\pm$ 0.09                             | 0.19 $\pm$ 0.07                              | 0.20 $\pm$ 0.11                               | 0.19 $\pm$ 0.09                               |
|        | bad  | -194843.43 $\pm$ 0.02                  | -0.03 $\pm$ 0.09                            | -0.01 $\pm$ 0.07                             | 0.02 $\pm$ 0.11                               | -0.02 $\pm$ 0.10                              |
|        | badq | -194848.27 $\pm$ 0.02                  | -0.03 $\pm$ 0.11                            | -0.02 $\pm$ 0.08                             | -0.04 $\pm$ 0.12                              | 0.00 $\pm$ 0.11                               |
| I4B    |      | -244115.72 $\pm$ 0.03                  | -0.01 $\pm$ 0.19                            | -0.02 $\pm$ 0.13                             | 0.09 $\pm$ 0.24                               | -0.08 $\pm$ 0.16                              |
|        | b    | -244116.40 $\pm$ 0.03                  | 0.04 $\pm$ 0.17                             | 0.02 $\pm$ 0.15                              | 0.02 $\pm$ 0.23                               | 0.02 $\pm$ 0.18                               |
|        | ba   | -244120.30 $\pm$ 0.03                  | -0.03 $\pm$ 0.15                            | -0.03 $\pm$ 0.12                             | -0.04 $\pm$ 0.18                              | -0.01 $\pm$ 0.15                              |
|        | bad  | -244120.62 $\pm$ 0.03                  | -0.05 $\pm$ 0.13                            | -0.05 $\pm$ 0.10                             | -0.14 $\pm$ 0.13                              | 0.03 $\pm$ 0.13                               |
|        | badq | -244120.29 $\pm$ 0.03                  | 0.09 $\pm$ 0.16                             | 0.11 $\pm$ 0.12                              | 0.01 $\pm$ 0.14                               | 0.12 $\pm$ 0.20                               |
| BZF    |      | -240489.62 $\pm$ 0.05                  | -0.08 $\pm$ 0.24                            | -0.11 $\pm$ 0.17                             | -0.31 $\pm$ 0.23                              | 0.07 $\pm$ 0.25                               |
|        | b    | -240489.38 $\pm$ 0.05                  | 0.58 $\pm$ 0.30                             | 0.54 $\pm$ 0.24                              | 0.54 $\pm$ 0.35                               | 0.57 $\pm$ 0.34                               |
|        | ba   | -240530.92 $\pm$ 0.02                  | 0.00 $\pm$ 0.11                             | 0.00 $\pm$ 0.08                              | -0.11 $\pm$ 0.11                              | 0.11 $\pm$ 0.11                               |
|        | bad  | -240530.51 $\pm$ 0.02                  | -0.05 $\pm$ 0.13                            | -0.03 $\pm$ 0.09                             | -0.12 $\pm$ 0.13                              | 0.03 $\pm$ 0.12                               |
|        | badq | -240531.52 $\pm$ 0.03                  | 0.25 $\pm$ 0.18                             | 0.26 $\pm$ 0.12                              | 0.22 $\pm$ 0.16                               | 0.26 $\pm$ 0.17                               |
| DEN    |      | -217978.77 $\pm$ 0.04                  | 0.06 $\pm$ 0.24                             | 0.06 $\pm$ 0.16                              | 0.34 $\pm$ 0.25                               | -0.12 $\pm$ 0.22                              |
|        | b    | -217978.52 $\pm$ 0.04                  | 0.04 $\pm$ 0.20                             | 0.07 $\pm$ 0.16                              | -0.04 $\pm$ 0.22                              | 0.21 $\pm$ 0.20                               |
|        | ba   | -218030.92 $\pm$ 0.02                  | -0.24 $\pm$ 0.10                            | -0.23 $\pm$ 0.07                             | -0.25 $\pm$ 0.11                              | -0.21 $\pm$ 0.10                              |

*Continued on next page*

Table 60 – Continued from previous page

| Molec. | MM'  | $\Delta G_{\text{TI3}}^{N_{\lambda}=11}$ | $\Delta\Delta G_{\text{TI}}^{N_{\lambda}=6}$ | $\Delta\Delta G_{\text{BAR}}^{N_{\lambda}=6}$ | $\Delta\Delta G_{\text{IEXP}}^{N_{\lambda}=5}$ | $\Delta\Delta G_{\text{DEXP}}^{N_{\lambda}=5}$ |
|--------|------|------------------------------------------|----------------------------------------------|-----------------------------------------------|------------------------------------------------|------------------------------------------------|
|        | bad  | -218028.84 ± 0.02                        | -0.20 ± 0.11                                 | -0.20 ± 0.08                                  | -0.18 ± 0.11                                   | -0.22 ± 0.10                                   |
|        | badq | -218028.61 ± 0.02                        | -0.21 ± 0.11                                 | -0.23 ± 0.08                                  | -0.19 ± 0.12                                   | -0.26 ± 0.10                                   |
| IND    |      | -228035.12 ± 0.05                        | 0.32 ± 0.30                                  | 0.36 ± 0.27                                   | 0.28 ± 0.33                                    | 0.43 ± 0.41                                    |
|        | b    | -228035.94 ± 0.05                        | 0.10 ± 0.25                                  | 0.13 ± 0.21                                   | -0.29 ± 0.25                                   | 0.53 ± 0.27                                    |
|        | ba   | -228074.91 ± 0.04                        | -0.05 ± 0.19                                 | -0.05 ± 0.16                                  | 0.05 ± 0.24                                    | -0.14 ± 0.20                                   |
|        | bad  | -228077.33 ± 0.03                        | 0.24 ± 0.18                                  | 0.25 ± 0.13                                   | 0.36 ± 0.24                                    | 0.23 ± 0.17                                    |
|        | badq | -228072.52 ± 0.05                        | -0.19 ± 0.26                                 | -0.20 ± 0.20                                  | -0.30 ± 0.30                                   | -0.04 ± 0.26                                   |
| OXE    |      | -194837.98 ± 0.03                        | 0.35 ± 0.15                                  | 0.31 ± 0.11                                   | 0.15 ± 0.16                                    | 0.49 ± 0.15                                    |
|        | b    | -194838.48 ± 0.02                        | 0.24 ± 0.16                                  | 0.24 ± 0.11                                   | 0.14 ± 0.13                                    | 0.25 ± 0.22                                    |
|        | ba   | -194846.17 ± 0.02                        | 0.29 ± 0.15                                  | 0.28 ± 0.11                                   | 0.17 ± 0.15                                    | 0.40 ± 0.16                                    |
|        | bad  | -194846.38 ± 0.02                        | 0.22 ± 0.13                                  | 0.22 ± 0.09                                   | 0.10 ± 0.13                                    | 0.38 ± 0.12                                    |
|        | badq | -194844.03 ± 0.03                        | 0.38 ± 0.13                                  | 0.38 ± 0.10                                   | 0.24 ± 0.12                                    | 0.53 ± 0.13                                    |
| N4B    |      | -244115.50 ± 0.03                        | -0.12 ± 0.18                                 | -0.13 ± 0.13                                  | -0.22 ± 0.17                                   | -0.09 ± 0.19                                   |
|        | b    | -244116.16 ± 0.03                        | 0.22 ± 0.14                                  | 0.19 ± 0.10                                   | 0.07 ± 0.15                                    | 0.31 ± 0.14                                    |
|        | ba   | -244122.56 ± 0.02                        | -0.22 ± 0.12                                 | -0.23 ± 0.08                                  | -0.35 ± 0.11                                   | -0.13 ± 0.12                                   |
|        | bad  | -244123.06 ± 0.02                        | -0.26 ± 0.14                                 | -0.28 ± 0.10                                  | -0.32 ± 0.13                                   | -0.27 ± 0.15                                   |
|        | badq | -244116.03 ± 0.03                        | 0.28 ± 0.14                                  | 0.25 ± 0.10                                   | 0.11 ± 0.14                                    | 0.36 ± 0.15                                    |

Table 61: MM-to-QM unbound-state ligand binding free energy correction values 2- $\lambda$  states simulated for 200 ps

| Molec. | MM'  | $\Delta G_{\text{TI3}}^{N_\lambda=11}$ | $\Delta \Delta G_{\text{TI}}^{N_\lambda=2}$ | $\Delta \Delta G_{\text{BAR}}^{N_\lambda=2}$ | $\Delta \Delta G_{\text{IEXP}}^{N_\lambda=1}$ | $\Delta \Delta G_{\text{DEXP}}^{N_\lambda=1}$ |
|--------|------|----------------------------------------|---------------------------------------------|----------------------------------------------|-----------------------------------------------|-----------------------------------------------|
| BNZ    |      | -145560.88 $\pm$ 0.02                  | -0.08 $\pm$ 0.06                            | -0.09 $\pm$ 0.07                             | -0.10 $\pm$ 0.11                              | -0.04 $\pm$ 0.12                              |
|        | b    | -145561.34 $\pm$ 0.02                  | -0.05 $\pm$ 0.05                            | -0.03 $\pm$ 0.06                             | -0.05 $\pm$ 0.11                              | -0.12 $\pm$ 0.15                              |
|        | ba   | -145565.50 $\pm$ 0.02                  | 0.10 $\pm$ 0.05                             | 0.09 $\pm$ 0.06                              | -0.05 $\pm$ 0.09                              | 0.20 $\pm$ 0.11                               |
|        | bad  | -145565.89 $\pm$ 0.02                  | 0.09 $\pm$ 0.05                             | 0.06 $\pm$ 0.07                              | 0.01 $\pm$ 0.10                               | 0.09 $\pm$ 0.09                               |
|        | badq | -145567.87 $\pm$ 0.02                  | -0.03 $\pm$ 0.05                            | 0.04 $\pm$ 0.07                              | 0.00 $\pm$ 0.14                               | 0.01 $\pm$ 0.21                               |
| PXY    |      | -194836.27 $\pm$ 0.03                  | -0.12 $\pm$ 0.08                            | -0.01 $\pm$ 0.09                             | -0.32 $\pm$ 0.12                              | -0.21 $\pm$ 0.33                              |
|        | b    | -194836.91 $\pm$ 0.03                  | 0.00 $\pm$ 0.08                             | 0.03 $\pm$ 0.10                              | 0.06 $\pm$ 0.19                               | 0.08 $\pm$ 0.21                               |
|        | ba   | -194843.73 $\pm$ 0.02                  | -0.04 $\pm$ 0.06                            | 0.02 $\pm$ 0.07                              | 0.04 $\pm$ 0.18                               | 0.14 $\pm$ 0.10                               |
|        | bad  | -194843.91 $\pm$ 0.03                  | -0.06 $\pm$ 0.07                            | -0.01 $\pm$ 0.08                             | 0.04 $\pm$ 0.19                               | 0.15 $\pm$ 0.09                               |
|        | badq | -194849.04 $\pm$ 0.05                  | -0.20 $\pm$ 0.14                            | 0.22 $\pm$ 0.29                              | -0.91 $\pm$ 0.46                              | 1.27 $\pm$ 0.34                               |
| I4B    |      | -244115.78 $\pm$ 0.03                  | -0.12 $\pm$ 0.09                            | -0.10 $\pm$ 0.11                             | -0.13 $\pm$ 0.27                              | 0.03 $\pm$ 0.20                               |
|        | b    | -244116.51 $\pm$ 0.03                  | -0.17 $\pm$ 0.09                            | -0.08 $\pm$ 0.09                             | -0.50 $\pm$ 0.10                              | 0.25 $\pm$ 0.20                               |
|        | ba   | -244120.47 $\pm$ 0.03                  | -0.18 $\pm$ 0.08                            | -0.09 $\pm$ 0.09                             | -0.63 $\pm$ 0.12                              | 0.02 $\pm$ 0.34                               |
|        | bad  | -244120.69 $\pm$ 0.03                  | -0.15 $\pm$ 0.08                            | -0.10 $\pm$ 0.09                             | -0.56 $\pm$ 0.12                              | 0.28 $\pm$ 0.13                               |
|        | badq | -244118.97 $\pm$ 0.05                  | -0.44 $\pm$ 0.13                            | -0.26 $\pm$ 0.21                             | -1.34 $\pm$ 0.45                              | 0.86 $\pm$ 0.15                               |
| BZF    |      | -240488.93 $\pm$ 0.05                  | 0.01 $\pm$ 0.14                             | 0.60 $\pm$ 0.24                              | 1.53 $\pm$ 0.59                               | 2.21 $\pm$ 0.22                               |
|        | b    | -240488.68 $\pm$ 0.06                  | 0.27 $\pm$ 0.14                             | -0.22 $\pm$ 0.24                             | -1.10 $\pm$ 0.38                              | 1.05 $\pm$ 0.27                               |
|        | ba   | -240530.60 $\pm$ 0.04                  | 0.09 $\pm$ 0.09                             | 0.03 $\pm$ 0.13                              | -0.43 $\pm$ 0.28                              | -0.69 $\pm$ 0.19                              |
|        | bad  | -240530.12 $\pm$ 0.04                  | -0.04 $\pm$ 0.09                            | -0.08 $\pm$ 0.13                             | -0.45 $\pm$ 0.19                              | -0.18 $\pm$ 0.30                              |
|        | badq | -240532.72 $\pm$ 0.04                  | -0.09 $\pm$ 0.12                            | 0.32 $\pm$ 0.18                              | 0.32 $\pm$ 0.29                               | 0.71 $\pm$ 0.27                               |
| DEN    |      | -217978.56 $\pm$ 0.04                  | -0.21 $\pm$ 0.11                            | -0.21 $\pm$ 0.20                             | -0.71 $\pm$ 0.35                              | -0.16 $\pm$ 0.50                              |
|        | b    | -217978.34 $\pm$ 0.04                  | 0.13 $\pm$ 0.12                             | 0.10 $\pm$ 0.16                              | 0.71 $\pm$ 0.39                               | 1.02 $\pm$ 0.16                               |
|        | ba   | -218030.69 $\pm$ 0.03                  | -0.26 $\pm$ 0.08                            | -0.21 $\pm$ 0.13                             | -0.12 $\pm$ 0.19                              | -0.61 $\pm$ 0.21                              |

*Continued on next page*

Table 61 – Continued from previous page

| Molec. | MM'  | $\Delta G_{\text{TI3}}^{N_{\lambda}=11}$ | $\Delta\Delta G_{\text{TI}}^{N_{\lambda}=2}$ | $\Delta\Delta G_{\text{BAR}}^{N_{\lambda}=2}$ | $\Delta\Delta G_{\text{IEXP}}^{N_{\lambda}=1}$ | $\Delta\Delta G_{\text{DEXP}}^{N_{\lambda}=1}$ |
|--------|------|------------------------------------------|----------------------------------------------|-----------------------------------------------|------------------------------------------------|------------------------------------------------|
|        | bad  | -218028.60 ± 0.03                        | -0.11 ± 0.08                                 | -0.01 ± 0.10                                  | -0.16 ± 0.17                                   | 0.03 ± 0.30                                    |
|        | badq | -218029.62 ± 0.03                        | -0.14 ± 0.09                                 | 0.05 ± 0.12                                   | -0.05 ± 0.23                                   | -0.53 ± 0.54                                   |
| IND    |      | -228035.76 ± 0.06                        | -1.72 ± 0.18                                 | -0.03 ± 0.52                                  | -2.27 ± 0.49                                   | 2.25 ± 0.41                                    |
|        | b    | -228035.97 ± 0.06                        | 0.38 ± 0.16                                  | -0.01 ± 0.38                                  | -2.07 ± 0.31                                   | 0.17 ± 0.58                                    |
|        | ba   | -228075.42 ± 0.05                        | 0.63 ± 0.15                                  | 0.20 ± 0.25                                   | -1.01 ± 0.28                                   | 1.27 ± 0.23                                    |
|        | bad  | -228077.63 ± 0.04                        | 0.19 ± 0.12                                  | 0.14 ± 0.18                                   | -0.99 ± 0.23                                   | 1.13 ± 0.28                                    |
|        | badq | -228062.14 ± 0.10                        | -2.31 ± 0.28                                 | -0.31 ± 0.71                                  | -8.64 ± 0.58                                   | 8.02 ± 0.42                                    |
| OXE    |      | -194838.45 ± 0.03                        | -0.24 ± 0.09                                 | -0.04 ± 0.10                                  | 0.20 ± 0.36                                    | 0.35 ± 0.15                                    |
|        | b    | -194839.14 ± 0.03                        | -0.18 ± 0.08                                 | -0.05 ± 0.10                                  | -0.24 ± 0.13                                   | 0.06 ± 0.26                                    |
|        | ba   | -194846.72 ± 0.03                        | -0.05 ± 0.08                                 | 0.00 ± 0.10                                   | 0.22 ± 0.35                                    | 0.15 ± 0.23                                    |
|        | bad  | -194847.04 ± 0.03                        | -0.10 ± 0.08                                 | 0.02 ± 0.09                                   | 0.27 ± 0.36                                    | 0.39 ± 0.18                                    |
|        | badq | -194845.65 ± 0.04                        | -0.70 ± 0.11                                 | -0.20 ± 0.16                                  | 0.76 ± 0.39                                    | 0.69 ± 0.19                                    |
| N4B    |      | -244115.61 ± 0.05                        | -0.06 ± 0.13                                 | -0.12 ± 0.17                                  | 0.20 ± 0.18                                    | 0.00 ± 0.37                                    |
|        | b    | -244116.29 ± 0.03                        | -0.28 ± 0.08                                 | -0.18 ± 0.11                                  | -0.84 ± 0.13                                   | 0.12 ± 0.29                                    |
|        | ba   | -244122.82 ± 0.03                        | -0.10 ± 0.08                                 | -0.07 ± 0.11                                  | -0.29 ± 0.17                                   | 0.10 ± 0.32                                    |
|        | bad  | -244123.36 ± 0.03                        | 0.06 ± 0.09                                  | 0.06 ± 0.12                                   | -0.11 ± 0.41                                   | 0.48 ± 0.15                                    |
|        | badq | -244115.45 ± 0.04                        | -0.61 ± 0.11                                 | -0.29 ± 0.21                                  | -1.39 ± 0.22                                   | 1.15 ± 0.16                                    |

Table 62: MM-to-QM unbound-state ligand binding free energy correction values 3- $\lambda$  states simulated for 200 ps

| Molec. | MM'  | $\Delta G_{\text{TI}3}^{N_\lambda=11}$ | $\Delta\Delta G_{\text{TI}}^{N_\lambda=3}$ | $\Delta\Delta G_{\text{BAR}}^{N_\lambda=3}$ | $\Delta\Delta G_{\text{IEXP}}^{N_\lambda=2}$ | $\Delta\Delta G_{\text{DEXP}}^{N_\lambda=2}$ |
|--------|------|----------------------------------------|--------------------------------------------|---------------------------------------------|----------------------------------------------|----------------------------------------------|
| BNZ    |      | -145560.88 $\pm$ 0.02                  | -0.03 $\pm$ 0.05                           | -0.04 $\pm$ 0.05                            | -0.04 $\pm$ 0.08                             | -0.01 $\pm$ 0.08                             |
|        | b    | -145561.34 $\pm$ 0.02                  | 0.01 $\pm$ 0.05                            | 0.00 $\pm$ 0.05                             | 0.05 $\pm$ 0.08                              | -0.05 $\pm$ 0.07                             |
|        | ba   | -145565.50 $\pm$ 0.02                  | 0.10 $\pm$ 0.04                            | 0.10 $\pm$ 0.04                             | 0.03 $\pm$ 0.06                              | 0.16 $\pm$ 0.06                              |
|        | bad  | -145565.89 $\pm$ 0.02                  | 0.02 $\pm$ 0.04                            | 0.03 $\pm$ 0.05                             | -0.01 $\pm$ 0.07                             | 0.05 $\pm$ 0.06                              |
|        | badq | -145567.87 $\pm$ 0.02                  | 0.01 $\pm$ 0.05                            | 0.02 $\pm$ 0.05                             | -0.02 $\pm$ 0.08                             | 0.05 $\pm$ 0.09                              |
| PXY    |      | -194836.27 $\pm$ 0.03                  | -0.02 $\pm$ 0.08                           | -0.01 $\pm$ 0.06                            | -0.01 $\pm$ 0.09                             | -0.04 $\pm$ 0.12                             |
|        | b    | -194836.91 $\pm$ 0.03                  | -0.04 $\pm$ 0.08                           | -0.03 $\pm$ 0.07                            | 0.02 $\pm$ 0.11                              | -0.06 $\pm$ 0.11                             |
|        | ba   | -194843.73 $\pm$ 0.02                  | -0.05 $\pm$ 0.05                           | -0.03 $\pm$ 0.04                            | -0.07 $\pm$ 0.07                             | 0.00 $\pm$ 0.08                              |
|        | bad  | -194843.91 $\pm$ 0.03                  | 0.05 $\pm$ 0.06                            | 0.04 $\pm$ 0.06                             | 0.03 $\pm$ 0.09                              | 0.08 $\pm$ 0.08                              |
|        | badq | -194849.04 $\pm$ 0.05                  | -0.15 $\pm$ 0.12                           | -0.04 $\pm$ 0.13                            | -0.22 $\pm$ 0.25                             | 0.02 $\pm$ 0.29                              |
| I4B    |      | -244115.78 $\pm$ 0.03                  | -0.05 $\pm$ 0.09                           | -0.06 $\pm$ 0.08                            | 0.00 $\pm$ 0.15                              | -0.08 $\pm$ 0.11                             |
|        | b    | -244116.51 $\pm$ 0.03                  | -0.04 $\pm$ 0.08                           | -0.04 $\pm$ 0.07                            | -0.24 $\pm$ 0.09                             | 0.17 $\pm$ 0.09                              |
|        | ba   | -244120.47 $\pm$ 0.03                  | -0.01 $\pm$ 0.08                           | -0.03 $\pm$ 0.08                            | 0.08 $\pm$ 0.10                              | 0.09 $\pm$ 0.15                              |
|        | bad  | -244120.69 $\pm$ 0.03                  | 0.00 $\pm$ 0.08                            | -0.01 $\pm$ 0.06                            | -0.11 $\pm$ 0.09                             | 0.10 $\pm$ 0.09                              |
|        | badq | -244118.97 $\pm$ 0.05                  | -0.14 $\pm$ 0.11                           | -0.13 $\pm$ 0.11                            | -0.42 $\pm$ 0.19                             | 0.03 $\pm$ 0.14                              |
| BZF    |      | -240488.93 $\pm$ 0.05                  | -0.22 $\pm$ 0.12                           | -0.08 $\pm$ 0.11                            | 0.20 $\pm$ 0.44                              | 0.36 $\pm$ 0.25                              |
|        | b    | -240488.68 $\pm$ 0.06                  | -0.09 $\pm$ 0.13                           | -0.11 $\pm$ 0.13                            | -0.24 $\pm$ 0.24                             | -0.21 $\pm$ 0.36                             |
|        | ba   | -240530.60 $\pm$ 0.04                  | 0.09 $\pm$ 0.09                            | 0.07 $\pm$ 0.10                             | 0.18 $\pm$ 0.17                              | -0.14 $\pm$ 0.16                             |
|        | bad  | -240530.12 $\pm$ 0.04                  | 0.05 $\pm$ 0.09                            | 0.02 $\pm$ 0.08                             | 0.14 $\pm$ 0.13                              | 0.02 $\pm$ 0.16                              |
|        | badq | -240532.72 $\pm$ 0.04                  | 0.20 $\pm$ 0.11                            | 0.26 $\pm$ 0.09                             | 0.36 $\pm$ 0.21                              | 0.05 $\pm$ 0.25                              |
| DEN    |      | -217978.56 $\pm$ 0.04                  | -0.11 $\pm$ 0.10                           | -0.12 $\pm$ 0.09                            | -0.19 $\pm$ 0.19                             | -0.12 $\pm$ 0.25                             |
|        | b    | -217978.34 $\pm$ 0.04                  | 0.00 $\pm$ 0.11                            | -0.04 $\pm$ 0.09                            | 0.60 $\pm$ 0.32                              | 0.21 $\pm$ 0.13                              |
|        | ba   | -218030.69 $\pm$ 0.03                  | -0.11 $\pm$ 0.08                           | -0.11 $\pm$ 0.09                            | -0.11 $\pm$ 0.10                             | -0.28 $\pm$ 0.18                             |

*Continued on next page*

Table 62 – Continued from previous page

| Molec. | MM'  | $\Delta G_{\text{TI3}}^{N_i=11}$ | $\Delta\Delta G_{\text{TI}}^{N_i=3}$ | $\Delta\Delta G_{\text{BAR}}^{N_i=3}$ | $\Delta\Delta G_{\text{IEXP}}^{N_i=2}$ | $\Delta\Delta G_{\text{DEXP}}^{N_i=2}$ |
|--------|------|----------------------------------|--------------------------------------|---------------------------------------|----------------------------------------|----------------------------------------|
|        | bad  | -218028.60 ± 0.03                | 0.06 ± 0.08                          | 0.03 ± 0.08                           | 0.08 ± 0.12                            | 0.10 ± 0.13                            |
|        | badq | -218029.62 ± 0.03                | 0.03 ± 0.08                          | 0.04 ± 0.08                           | 0.08 ± 0.12                            | -0.11 ± 0.26                           |
| IND    |      | -228035.76 ± 0.06                | -0.50 ± 0.15                         | -0.40 ± 0.18                          | -0.55 ± 0.36                           | 0.82 ± 0.21                            |
|        | b    | -228035.97 ± 0.06                | -0.20 ± 0.15                         | -0.18 ± 0.16                          | -0.71 ± 0.25                           | -0.40 ± 0.42                           |
|        | ba   | -228075.42 ± 0.05                | 0.25 ± 0.12                          | 0.16 ± 0.11                           | 0.18 ± 0.19                            | 0.22 ± 0.22                            |
|        | bad  | -228077.63 ± 0.04                | 0.13 ± 0.10                          | 0.08 ± 0.10                           | 0.32 ± 0.17                            | 0.44 ± 0.14                            |
|        | badq | -228062.14 ± 0.10                | -0.25 ± 0.25                         | 0.06 ± 0.42                           | -0.96 ± 0.72                           | 1.12 ± 0.59                            |
| OXE    |      | -194838.45 ± 0.03                | -0.01 ± 0.08                         | -0.03 ± 0.07                          | 0.07 ± 0.14                            | 0.14 ± 0.09                            |
|        | b    | -194839.14 ± 0.03                | 0.00 ± 0.07                          | -0.01 ± 0.07                          | -0.04 ± 0.09                           | 0.02 ± 0.11                            |
|        | ba   | -194846.72 ± 0.03                | 0.05 ± 0.07                          | 0.03 ± 0.06                           | 0.02 ± 0.12                            | 0.17 ± 0.09                            |
|        | bad  | -194847.04 ± 0.03                | -0.05 ± 0.08                         | -0.04 ± 0.07                          | 0.11 ± 0.12                            | -0.08 ± 0.11                           |
|        | badq | -194845.65 ± 0.04                | 0.02 ± 0.10                          | 0.00 ± 0.09                           | 0.37 ± 0.26                            | 0.13 ± 0.20                            |
| N4B    |      | -244115.61 ± 0.05                | -0.02 ± 0.11                         | -0.02 ± 0.10                          | -0.17 ± 0.13                           | 0.02 ± 0.18                            |
|        | b    | -244116.29 ± 0.03                | -0.04 ± 0.08                         | -0.07 ± 0.08                          | -0.16 ± 0.12                           | 0.05 ± 0.13                            |
|        | ba   | -244122.82 ± 0.03                | -0.03 ± 0.07                         | -0.03 ± 0.07                          | -0.17 ± 0.10                           | 0.15 ± 0.12                            |
|        | bad  | -244123.36 ± 0.03                | -0.01 ± 0.07                         | 0.00 ± 0.07                           | -0.15 ± 0.13                           | 0.21 ± 0.09                            |
|        | badq | -244115.45 ± 0.04                | -0.34 ± 0.10                         | -0.31 ± 0.11                          | -0.68 ± 0.16                           | -0.05 ± 0.28                           |

Table 63: MM-to-QM unbound-state ligand binding free energy correction values 6- $\lambda$  states simulated for 200 ps

| Molec. | MM'  | $\Delta G_{\text{TI}3}^{N_\lambda=11}$ | $\Delta\Delta G_{\text{TI}}^{N_\lambda=6}$ | $\Delta\Delta G_{\text{BAR}}^{N_\lambda=6}$ | $\Delta\Delta G_{\text{IEXP}}^{N_\lambda=5}$ | $\Delta\Delta G_{\text{DEXP}}^{N_\lambda=5}$ |
|--------|------|----------------------------------------|--------------------------------------------|---------------------------------------------|----------------------------------------------|----------------------------------------------|
| BNZ    |      | -145560.88 $\pm$ 0.02                  | -0.06 $\pm$ 0.04                           | -0.06 $\pm$ 0.04                            | -0.04 $\pm$ 0.04                             | -0.07 $\pm$ 0.04                             |
|        | b    | -145561.34 $\pm$ 0.02                  | 0.00 $\pm$ 0.04                            | 0.00 $\pm$ 0.04                             | 0.02 $\pm$ 0.04                              | -0.03 $\pm$ 0.04                             |
|        | ba   | -145565.50 $\pm$ 0.02                  | 0.00 $\pm$ 0.04                            | 0.00 $\pm$ 0.03                             | -0.01 $\pm$ 0.04                             | 0.02 $\pm$ 0.04                              |
|        | bad  | -145565.89 $\pm$ 0.02                  | 0.06 $\pm$ 0.04                            | 0.05 $\pm$ 0.03                             | 0.05 $\pm$ 0.04                              | 0.06 $\pm$ 0.04                              |
|        | badq | -145567.87 $\pm$ 0.02                  | 0.03 $\pm$ 0.04                            | 0.03 $\pm$ 0.04                             | 0.03 $\pm$ 0.05                              | 0.03 $\pm$ 0.05                              |
| PXY    |      | -194836.27 $\pm$ 0.03                  | -0.02 $\pm$ 0.05                           | -0.02 $\pm$ 0.04                            | 0.00 $\pm$ 0.06                              | -0.04 $\pm$ 0.07                             |
|        | b    | -194836.91 $\pm$ 0.03                  | 0.06 $\pm$ 0.05                            | 0.06 $\pm$ 0.05                             | 0.07 $\pm$ 0.07                              | 0.05 $\pm$ 0.07                              |
|        | ba   | -194843.73 $\pm$ 0.02                  | -0.02 $\pm$ 0.04                           | -0.02 $\pm$ 0.04                            | -0.04 $\pm$ 0.05                             | 0.00 $\pm$ 0.04                              |
|        | bad  | -194843.91 $\pm$ 0.03                  | -0.05 $\pm$ 0.05                           | -0.05 $\pm$ 0.04                            | -0.05 $\pm$ 0.05                             | -0.04 $\pm$ 0.05                             |
|        | badq | -194849.04 $\pm$ 0.05                  | 0.04 $\pm$ 0.09                            | 0.06 $\pm$ 0.09                             | 0.00 $\pm$ 0.11                              | 0.11 $\pm$ 0.12                              |
| I4B    |      | -244115.78 $\pm$ 0.03                  | 0.01 $\pm$ 0.06                            | 0.01 $\pm$ 0.05                             | 0.01 $\pm$ 0.07                              | -0.01 $\pm$ 0.07                             |
|        | b    | -244116.51 $\pm$ 0.03                  | 0.02 $\pm$ 0.06                            | 0.02 $\pm$ 0.05                             | -0.01 $\pm$ 0.07                             | 0.05 $\pm$ 0.07                              |
|        | ba   | -244120.47 $\pm$ 0.03                  | -0.05 $\pm$ 0.05                           | -0.05 $\pm$ 0.05                            | -0.08 $\pm$ 0.07                             | -0.01 $\pm$ 0.07                             |
|        | bad  | -244120.69 $\pm$ 0.03                  | 0.03 $\pm$ 0.05                            | 0.02 $\pm$ 0.04                             | -0.01 $\pm$ 0.06                             | 0.06 $\pm$ 0.06                              |
|        | badq | -244118.97 $\pm$ 0.05                  | -0.06 $\pm$ 0.09                           | -0.08 $\pm$ 0.08                            | -0.13 $\pm$ 0.09                             | -0.06 $\pm$ 0.11                             |
| BZF    |      | -240488.93 $\pm$ 0.05                  | 0.01 $\pm$ 0.09                            | 0.00 $\pm$ 0.09                             | 0.15 $\pm$ 0.15                              | 0.05 $\pm$ 0.11                              |
|        | b    | -240488.68 $\pm$ 0.06                  | 0.01 $\pm$ 0.10                            | 0.01 $\pm$ 0.08                             | 0.03 $\pm$ 0.13                              | -0.04 $\pm$ 0.12                             |
|        | ba   | -240530.60 $\pm$ 0.04                  | -0.02 $\pm$ 0.06                           | -0.01 $\pm$ 0.06                            | -0.01 $\pm$ 0.08                             | -0.07 $\pm$ 0.08                             |
|        | bad  | -240530.12 $\pm$ 0.04                  | 0.02 $\pm$ 0.06                            | 0.01 $\pm$ 0.06                             | 0.04 $\pm$ 0.08                              | -0.02 $\pm$ 0.08                             |
|        | badq | -240532.72 $\pm$ 0.04                  | -0.08 $\pm$ 0.07                           | -0.04 $\pm$ 0.07                            | 0.00 $\pm$ 0.10                              | -0.04 $\pm$ 0.11                             |
| DEN    |      | -217978.56 $\pm$ 0.04                  | -0.07 $\pm$ 0.07                           | -0.07 $\pm$ 0.07                            | -0.09 $\pm$ 0.10                             | -0.08 $\pm$ 0.11                             |
|        | b    | -217978.34 $\pm$ 0.04                  | -0.05 $\pm$ 0.07                           | -0.06 $\pm$ 0.06                            | -0.04 $\pm$ 0.10                             | -0.06 $\pm$ 0.09                             |
|        | ba   | -218030.69 $\pm$ 0.03                  | -0.12 $\pm$ 0.05                           | -0.12 $\pm$ 0.05                            | -0.10 $\pm$ 0.07                             | -0.14 $\pm$ 0.07                             |

*Continued on next page*

Table 63 – *Continued from previous page*

| Molec. | MM'  | $\Delta G_{\text{TI3}}^{N_{\lambda}=11}$ | $\Delta\Delta G_{\text{TI}}^{N_{\lambda}=6}$ | $\Delta\Delta G_{\text{BAR}}^{N_{\lambda}=6}$ | $\Delta\Delta G_{\text{IEXP}}^{N_{\lambda}=5}$ | $\Delta\Delta G_{\text{DEXP}}^{N_{\lambda}=5}$ |
|--------|------|------------------------------------------|----------------------------------------------|-----------------------------------------------|------------------------------------------------|------------------------------------------------|
|        | bad  | -218028.60 ± 0.03                        | 0.03 ± 0.05                                  | 0.04 ± 0.05                                   | 0.03 ± 0.07                                    | 0.05 ± 0.07                                    |
|        | badq | -218029.62 ± 0.03                        | 0.01 ± 0.06                                  | 0.02 ± 0.06                                   | 0.04 ± 0.08                                    | -0.02 ± 0.09                                   |
| IND    |      | -228035.76 ± 0.06                        | -0.20 ± 0.11                                 | -0.22 ± 0.10                                  | -0.31 ± 0.16                                   | 0.04 ± 0.16                                    |
|        | b    | -228035.97 ± 0.06                        | 0.07 ± 0.10                                  | 0.07 ± 0.09                                   | -0.09 ± 0.13                                   | 0.17 ± 0.13                                    |
|        | ba   | -228075.42 ± 0.05                        | -0.01 ± 0.09                                 | -0.01 ± 0.08                                  | -0.05 ± 0.11                                   | -0.04 ± 0.10                                   |
|        | bad  | -228077.63 ± 0.04                        | -0.04 ± 0.07                                 | -0.05 ± 0.07                                  | -0.12 ± 0.10                                   | 0.07 ± 0.08                                    |
|        | badq | -228062.14 ± 0.10                        | -0.21 ± 0.18                                 | -0.17 ± 0.19                                  | -0.38 ± 0.40                                   | -0.86 ± 0.33                                   |
| OXE    |      | -194838.45 ± 0.03                        | -0.05 ± 0.06                                 | -0.06 ± 0.05                                  | -0.06 ± 0.07                                   | -0.02 ± 0.07                                   |
|        | b    | -194839.14 ± 0.03                        | -0.02 ± 0.05                                 | -0.02 ± 0.05                                  | -0.01 ± 0.06                                   | -0.05 ± 0.07                                   |
|        | ba   | -194846.72 ± 0.03                        | -0.03 ± 0.05                                 | -0.03 ± 0.04                                  | -0.06 ± 0.06                                   | 0.00 ± 0.06                                    |
|        | bad  | -194847.04 ± 0.03                        | -0.03 ± 0.05                                 | -0.03 ± 0.05                                  | -0.01 ± 0.06                                   | -0.02 ± 0.06                                   |
|        | badq | -194845.65 ± 0.04                        | -0.09 ± 0.07                                 | -0.10 ± 0.07                                  | -0.10 ± 0.10                                   | -0.05 ± 0.10                                   |
| N4B    |      | -244115.61 ± 0.05                        | 0.17 ± 0.09                                  | 0.16 ± 0.08                                   | 0.12 ± 0.10                                    | 0.20 ± 0.10                                    |
|        | b    | -244116.29 ± 0.03                        | -0.07 ± 0.06                                 | -0.07 ± 0.05                                  | -0.09 ± 0.09                                   | -0.03 ± 0.07                                   |
|        | ba   | -244122.82 ± 0.03                        | 0.05 ± 0.05                                  | 0.04 ± 0.05                                   | 0.00 ± 0.07                                    | 0.10 ± 0.07                                    |
|        | bad  | -244123.36 ± 0.03                        | 0.06 ± 0.06                                  | 0.06 ± 0.05                                   | 0.02 ± 0.09                                    | 0.05 ± 0.12                                    |
|        | badq | -244115.45 ± 0.04                        | 0.11 ± 0.08                                  | 0.12 ± 0.07                                   | 0.07 ± 0.11                                    | 0.12 ± 0.11                                    |



Table 64: MM-to-QM unbound-state ligand binding free energy correction values 2- $\lambda$  states simulated for 100 ps

| Molec. | MM'  | $\Delta G_{\text{TI3}}^{N_\lambda=11}$ | $\Delta \Delta G_{\text{TI}}^{N_\lambda=2}$ | $\Delta \Delta G_{\text{BAR}}^{N_\lambda=2}$ | $\Delta \Delta G_{\text{IEXP}}^{N_\lambda=1}$ | $\Delta \Delta G_{\text{DEXP}}^{N_\lambda=1}$ |
|--------|------|----------------------------------------|---------------------------------------------|----------------------------------------------|-----------------------------------------------|-----------------------------------------------|
| BNZ    |      | -145560.88 $\pm$ 0.02                  | 0.07 $\pm$ 0.07                             | -0.02 $\pm$ 0.09                             | -0.17 $\pm$ 0.12                              | 0.16 $\pm$ 0.11                               |
|        | b    | -145561.34 $\pm$ 0.02                  | 0.17 $\pm$ 0.06                             | 0.11 $\pm$ 0.08                              | -0.05 $\pm$ 0.10                              | 0.25 $\pm$ 0.16                               |
|        | ba   | -145565.50 $\pm$ 0.02                  | 0.07 $\pm$ 0.06                             | 0.05 $\pm$ 0.07                              | 0.01 $\pm$ 0.12                               | -0.37 $\pm$ 0.34                              |
|        | bad  | -145565.89 $\pm$ 0.02                  | 0.14 $\pm$ 0.06                             | 0.09 $\pm$ 0.07                              | 0.08 $\pm$ 0.13                               | 0.09 $\pm$ 0.11                               |
|        | badq | -145567.87 $\pm$ 0.02                  | -0.05 $\pm$ 0.08                            | -0.01 $\pm$ 0.13                             | 0.13 $\pm$ 0.20                               | 0.00 $\pm$ 0.17                               |
| PXY    |      | -194836.27 $\pm$ 0.03                  | -0.27 $\pm$ 0.12                            | -0.17 $\pm$ 0.13                             | -0.21 $\pm$ 0.25                              | -0.64 $\pm$ 0.39                              |
|        | b    | -194836.91 $\pm$ 0.03                  | -0.01 $\pm$ 0.10                            | -0.05 $\pm$ 0.15                             | -0.07 $\pm$ 0.25                              | 0.38 $\pm$ 0.15                               |
|        | ba   | -194843.73 $\pm$ 0.02                  | -0.15 $\pm$ 0.09                            | -0.08 $\pm$ 0.11                             | -0.32 $\pm$ 0.18                              | -0.10 $\pm$ 0.26                              |
|        | bad  | -194843.91 $\pm$ 0.03                  | -0.15 $\pm$ 0.09                            | -0.10 $\pm$ 0.12                             | -0.31 $\pm$ 0.21                              | 0.15 $\pm$ 0.24                               |
|        | badq | -194849.04 $\pm$ 0.05                  | -0.13 $\pm$ 0.21                            | 0.40 $\pm$ 0.43                              | 0.12 $\pm$ 0.53                               | 0.40 $\pm$ 0.55                               |
| I4B    |      | -244115.78 $\pm$ 0.03                  | 0.02 $\pm$ 0.11                             | 0.07 $\pm$ 0.16                              | 0.04 $\pm$ 0.49                               | 0.74 $\pm$ 0.16                               |
|        | b    | -244116.51 $\pm$ 0.03                  | 0.00 $\pm$ 0.12                             | 0.08 $\pm$ 0.16                              | -0.22 $\pm$ 0.16                              | 0.03 $\pm$ 0.30                               |
|        | ba   | -244120.47 $\pm$ 0.03                  | 0.07 $\pm$ 0.11                             | 0.19 $\pm$ 0.13                              | -0.27 $\pm$ 0.14                              | -0.15 $\pm$ 0.37                              |
|        | bad  | -244120.69 $\pm$ 0.03                  | 0.09 $\pm$ 0.11                             | 0.19 $\pm$ 0.13                              | -0.24 $\pm$ 0.13                              | 0.09 $\pm$ 0.23                               |
|        | badq | -244118.97 $\pm$ 0.05                  | -0.41 $\pm$ 0.18                            | -0.16 $\pm$ 0.26                             | -1.05 $\pm$ 0.36                              | 0.82 $\pm$ 0.25                               |
| BZF    |      | -240488.93 $\pm$ 0.05                  | 0.01 $\pm$ 0.19                             | 0.28 $\pm$ 0.34                              | -0.93 $\pm$ 0.40                              | 2.01 $\pm$ 0.23                               |
|        | b    | -240488.68 $\pm$ 0.06                  | 0.63 $\pm$ 0.20                             | 0.24 $\pm$ 0.34                              | -0.89 $\pm$ 0.51                              | 1.83 $\pm$ 0.40                               |
|        | ba   | -240530.60 $\pm$ 0.04                  | 0.17 $\pm$ 0.13                             | 0.06 $\pm$ 0.17                              | 0.25 $\pm$ 0.37                               | 0.11 $\pm$ 0.25                               |
|        | bad  | -240530.12 $\pm$ 0.04                  | 0.44 $\pm$ 0.12                             | 0.39 $\pm$ 0.19                              | 0.18 $\pm$ 0.27                               | 0.87 $\pm$ 0.30                               |
|        | badq | -240532.72 $\pm$ 0.04                  | -0.59 $\pm$ 0.16                            | -0.52 $\pm$ 0.27                             | -1.62 $\pm$ 0.32                              | -0.45 $\pm$ 0.34                              |
| DEN    |      | -217978.56 $\pm$ 0.04                  | -0.37 $\pm$ 0.15                            | -0.13 $\pm$ 0.24                             | -0.86 $\pm$ 0.34                              | 1.20 $\pm$ 0.25                               |
|        | b    | -217978.34 $\pm$ 0.04                  | 0.03 $\pm$ 0.16                             | 0.03 $\pm$ 0.33                              | 0.45 $\pm$ 0.46                               | 0.58 $\pm$ 0.34                               |
|        | ba   | -218030.69 $\pm$ 0.03                  | -0.20 $\pm$ 0.11                            | -0.06 $\pm$ 0.22                             | 0.37 $\pm$ 0.53                               | 0.08 $\pm$ 0.18                               |

*Continued on next page*

Table 64 – Continued from previous page

| Molec. | MM'  | $\Delta G_{\text{TI3}}^{N_{\lambda}=11}$ | $\Delta\Delta G_{\text{TI}}^{N_{\lambda}=2}$ | $\Delta\Delta G_{\text{BAR}}^{N_{\lambda}=2}$ | $\Delta\Delta G_{\text{IEXP}}^{N_{\lambda}=1}$ | $\Delta\Delta G_{\text{DEXP}}^{N_{\lambda}=1}$ |
|--------|------|------------------------------------------|----------------------------------------------|-----------------------------------------------|------------------------------------------------|------------------------------------------------|
|        | bad  | -218028.60 ± 0.03                        | -0.13 ± 0.11                                 | 0.05 ± 0.20                                   | 0.33 ± 0.54                                    | 0.37 ± 0.28                                    |
|        | badq | -218029.62 ± 0.03                        | -0.27 ± 0.12                                 | -0.01 ± 0.14                                  | -0.21 ± 0.34                                   | 0.27 ± 0.16                                    |
| IND    |      | -228035.76 ± 0.06                        | -0.33 ± 0.20                                 | -0.23 ± 0.49                                  | -3.05 ± 0.36                                   | 2.58 ± 0.42                                    |
|        | b    | -228035.97 ± 0.06                        | -0.26 ± 0.23                                 | 0.21 ± 0.55                                   | -2.26 ± 0.46                                   | 2.67 ± 0.38                                    |
|        | ba   | -228075.42 ± 0.05                        | 0.33 ± 0.20                                  | 0.07 ± 0.37                                   | -1.53 ± 0.34                                   | 1.59 ± 0.25                                    |
|        | bad  | -228077.63 ± 0.04                        | -0.25 ± 0.17                                 | -0.13 ± 0.33                                  | -1.46 ± 0.38                                   | -1.79 ± 0.59                                   |
|        | badq | -228062.14 ± 0.10                        | -3.46 ± 0.36                                 | -1.00 ± 0.66                                  | -10.98 ± 0.56                                  | 8.97 ± 0.35                                    |
| OXE    |      | -194838.45 ± 0.03                        | -0.12 ± 0.12                                 | -0.02 ± 0.15                                  | -0.15 ± 0.25                                   | -0.34 ± 0.29                                   |
|        | b    | -194839.14 ± 0.03                        | 0.07 ± 0.10                                  | 0.17 ± 0.11                                   | -0.18 ± 0.15                                   | 0.45 ± 0.23                                    |
|        | ba   | -194846.72 ± 0.03                        | -0.10 ± 0.10                                 | 0.01 ± 0.12                                   | 0.22 ± 0.22                                    | 0.17 ± 0.23                                    |
|        | bad  | -194847.04 ± 0.03                        | 0.06 ± 0.10                                  | 0.17 ± 0.13                                   | 0.25 ± 0.22                                    | 0.10 ± 0.13                                    |
|        | badq | -194845.65 ± 0.04                        | -0.40 ± 0.16                                 | -0.06 ± 0.18                                  | -0.50 ± 0.40                                   | 0.05 ± 0.38                                    |
| N4B    |      | -244115.61 ± 0.05                        | -0.06 ± 0.13                                 | -0.12 ± 0.17                                  | 0.20 ± 0.18                                    | 0.00 ± 0.37                                    |
|        | b    | -244116.29 ± 0.03                        | 0.07 ± 0.10                                  | 0.13 ± 0.13                                   | -0.46 ± 0.23                                   | 0.82 ± 0.13                                    |
|        | ba   | -244122.82 ± 0.03                        | 0.20 ± 0.10                                  | 0.21 ± 0.13                                   | -0.09 ± 0.24                                   | 0.46 ± 0.22                                    |
|        | bad  | -244123.36 ± 0.03                        | -0.01 ± 0.10                                 | -0.05 ± 0.10                                  | 0.02 ± 0.22                                    | -0.22 ± 0.31                                   |
|        | badq | -244115.45 ± 0.04                        | -0.36 ± 0.16                                 | 0.20 ± 0.25                                   | 0.04 ± 0.32                                    | 1.45 ± 0.19                                    |

Table 65: MM-to-QM unbound-state ligand binding free energy correction values 3- $\lambda$  states simulated for 100 ps

| Molec. | MM'  | $\Delta G_{\text{TI}3}^{N_\lambda=11}$ | $\Delta\Delta G_{\text{TI}}^{N_\lambda=3}$ | $\Delta\Delta G_{\text{BAR}}^{N_\lambda=3}$ | $\Delta\Delta G_{\text{IEXP}}^{N_\lambda=2}$ | $\Delta\Delta G_{\text{DEXP}}^{N_\lambda=2}$ |
|--------|------|----------------------------------------|--------------------------------------------|---------------------------------------------|----------------------------------------------|----------------------------------------------|
| BNZ    |      | -145560.88 $\pm$ 0.02                  | -0.05 $\pm$ 0.07                           | -0.04 $\pm$ 0.06                            | -0.07 $\pm$ 0.09                             | -0.07 $\pm$ 0.10                             |
|        | b    | -145561.34 $\pm$ 0.02                  | 0.00 $\pm$ 0.06                            | 0.02 $\pm$ 0.06                             | -0.02 $\pm$ 0.09                             | 0.03 $\pm$ 0.10                              |
|        | ba   | -145565.50 $\pm$ 0.02                  | -0.05 $\pm$ 0.06                           | -0.03 $\pm$ 0.05                            | -0.01 $\pm$ 0.07                             | -0.16 $\pm$ 0.12                             |
|        | bad  | -145565.89 $\pm$ 0.02                  | 0.24 $\pm$ 0.06                            | 0.21 $\pm$ 0.05                             | 0.19 $\pm$ 0.08                              | 0.20 $\pm$ 0.08                              |
|        | badq | -145567.87 $\pm$ 0.02                  | -0.01 $\pm$ 0.07                           | -0.01 $\pm$ 0.07                            | 0.07 $\pm$ 0.13                              | -0.07 $\pm$ 0.11                             |
| PXY    |      | -194836.27 $\pm$ 0.03                  | -0.02 $\pm$ 0.09                           | -0.02 $\pm$ 0.09                            | -0.06 $\pm$ 0.14                             | -0.11 $\pm$ 0.15                             |
|        | b    | -194836.91 $\pm$ 0.03                  | 0.19 $\pm$ 0.10                            | 0.14 $\pm$ 0.10                             | 0.16 $\pm$ 0.20                              | 0.10 $\pm$ 0.20                              |
|        | ba   | -194843.73 $\pm$ 0.02                  | 0.16 $\pm$ 0.08                            | 0.11 $\pm$ 0.08                             | 0.02 $\pm$ 0.11                              | 0.18 $\pm$ 0.12                              |
|        | bad  | -194843.91 $\pm$ 0.03                  | -0.03 $\pm$ 0.09                           | -0.05 $\pm$ 0.08                            | -0.12 $\pm$ 0.11                             | 0.07 $\pm$ 0.10                              |
|        | badq | -194849.04 $\pm$ 0.05                  | 0.37 $\pm$ 0.17                            | 0.40 $\pm$ 0.28                             | 0.80 $\pm$ 0.44                              | 0.51 $\pm$ 0.39                              |
| I4B    |      | -244115.78 $\pm$ 0.03                  | 0.05 $\pm$ 0.10                            | 0.04 $\pm$ 0.09                             | 0.00 $\pm$ 0.23                              | 0.37 $\pm$ 0.12                              |
|        | b    | -244116.51 $\pm$ 0.03                  | 0.08 $\pm$ 0.11                            | 0.08 $\pm$ 0.09                             | 0.15 $\pm$ 0.14                              | -0.06 $\pm$ 0.21                             |
|        | ba   | -244120.47 $\pm$ 0.03                  | 0.06 $\pm$ 0.09                            | 0.09 $\pm$ 0.09                             | 0.01 $\pm$ 0.11                              | 0.03 $\pm$ 0.17                              |
|        | bad  | -244120.69 $\pm$ 0.03                  | 0.08 $\pm$ 0.09                            | 0.12 $\pm$ 0.09                             | 0.02 $\pm$ 0.11                              | 0.11 $\pm$ 0.14                              |
|        | badq | -244118.97 $\pm$ 0.05                  | -0.09 $\pm$ 0.16                           | -0.11 $\pm$ 0.18                            | -0.01 $\pm$ 0.25                             | 0.13 $\pm$ 0.25                              |
| BZF    |      | -240488.93 $\pm$ 0.05                  | -0.07 $\pm$ 0.16                           | -0.07 $\pm$ 0.15                            | -0.05 $\pm$ 0.41                             | 0.62 $\pm$ 0.17                              |
|        | b    | -240488.68 $\pm$ 0.06                  | 0.06 $\pm$ 0.17                            | 0.06 $\pm$ 0.15                             | -0.33 $\pm$ 0.31                             | 0.63 $\pm$ 0.21                              |
|        | ba   | -240530.60 $\pm$ 0.04                  | 0.21 $\pm$ 0.12                            | 0.17 $\pm$ 0.12                             | 0.21 $\pm$ 0.20                              | 0.09 $\pm$ 0.17                              |
|        | bad  | -240530.12 $\pm$ 0.04                  | 0.13 $\pm$ 0.12                            | 0.16 $\pm$ 0.12                             | 0.11 $\pm$ 0.16                              | 0.31 $\pm$ 0.16                              |
|        | badq | -240532.72 $\pm$ 0.04                  | -0.11 $\pm$ 0.15                           | -0.13 $\pm$ 0.14                            | -0.19 $\pm$ 0.34                             | -0.37 $\pm$ 0.25                             |
| DEN    |      | -217978.56 $\pm$ 0.04                  | -0.20 $\pm$ 0.13                           | -0.19 $\pm$ 0.13                            | -0.36 $\pm$ 0.27                             | 0.06 $\pm$ 0.16                              |
|        | b    | -217978.34 $\pm$ 0.04                  | 0.08 $\pm$ 0.14                            | 0.05 $\pm$ 0.14                             | 0.01 $\pm$ 0.24                              | 0.30 $\pm$ 0.19                              |
|        | ba   | -218030.69 $\pm$ 0.03                  | -0.15 $\pm$ 0.11                           | -0.12 $\pm$ 0.12                            | 0.02 $\pm$ 0.35                              | -0.24 $\pm$ 0.16                             |

*Continued on next page*

Table 65 – Continued from previous page

| Molec. | MM'  | $\Delta G_{\text{TI3}}^{N_\lambda=11}$ | $\Delta\Delta G_{\text{TI}}^{N_\lambda=3}$ | $\Delta\Delta G_{\text{BAR}}^{N_\lambda=3}$ | $\Delta\Delta G_{\text{IEXP}}^{N_\lambda=2}$ | $\Delta\Delta G_{\text{DEXP}}^{N_\lambda=2}$ |
|--------|------|----------------------------------------|--------------------------------------------|---------------------------------------------|----------------------------------------------|----------------------------------------------|
|        | bad  | -218028.60 ± 0.03                      | 0.17 ± 0.09                                | 0.16 ± 0.11                                 | 0.11 ± 0.34                                  | 0.23 ± 0.25                                  |
|        | badq | -218029.62 ± 0.03                      | 0.27 ± 0.09                                | 0.23 ± 0.09                                 | 0.41 ± 0.28                                  | 0.43 ± 0.09                                  |
| IND    |      | -228035.76 ± 0.06                      | 0.33 ± 0.21                                | 0.25 ± 0.22                                 | -0.07 ± 0.28                                 | 0.70 ± 0.50                                  |
|        | b    | -228035.97 ± 0.06                      | 0.03 ± 0.19                                | 0.07 ± 0.21                                 | -0.53 ± 0.36                                 | 0.65 ± 0.44                                  |
|        | ba   | -228075.42 ± 0.05                      | -0.04 ± 0.16                               | -0.05 ± 0.17                                | -0.46 ± 0.32                                 | 0.42 ± 0.24                                  |
|        | bad  | -228077.63 ± 0.04                      | -0.21 ± 0.15                               | -0.23 ± 0.16                                | -0.45 ± 0.24                                 | -0.45 ± 0.46                                 |
|        | badq | -228062.14 ± 0.10                      | -0.59 ± 0.32                               | -0.29 ± 0.47                                | -3.44 ± 0.52                                 | 3.16 ± 0.33                                  |
| OXE    |      | -194838.45 ± 0.03                      | -0.16 ± 0.10                               | -0.14 ± 0.09                                | -0.05 ± 0.16                                 | -0.15 ± 0.14                                 |
|        | b    | -194839.14 ± 0.03                      | 0.15 ± 0.09                                | 0.14 ± 0.08                                 | 0.11 ± 0.12                                  | 0.30 ± 0.11                                  |
|        | ba   | -194846.72 ± 0.03                      | 0.17 ± 0.09                                | 0.14 ± 0.08                                 | 0.24 ± 0.13                                  | 0.21 ± 0.12                                  |
|        | bad  | -194847.04 ± 0.03                      | 0.08 ± 0.10                                | 0.11 ± 0.09                                 | 0.20 ± 0.13                                  | -0.01 ± 0.14                                 |
|        | badq | -194845.65 ± 0.04                      | 0.11 ± 0.14                                | 0.10 ± 0.13                                 | -0.02 ± 0.23                                 | 0.13 ± 0.23                                  |
| N4B    |      | -244115.61 ± 0.05                      | -0.02 ± 0.11                               | -0.02 ± 0.10                                | -0.17 ± 0.13                                 | 0.02 ± 0.18                                  |
|        | b    | -244116.29 ± 0.03                      | 0.14 ± 0.10                                | 0.15 ± 0.10                                 | 0.02 ± 0.21                                  | 0.31 ± 0.27                                  |
|        | ba   | -244122.82 ± 0.03                      | 0.42 ± 0.09                                | 0.38 ± 0.09                                 | 0.22 ± 0.15                                  | 0.52 ± 0.17                                  |
|        | bad  | -244123.36 ± 0.03                      | -0.08 ± 0.10                               | -0.07 ± 0.09                                | 0.07 ± 0.14                                  | -0.34 ± 0.15                                 |
|        | badq | -244115.45 ± 0.04                      | -0.26 ± 0.15                               | -0.15 ± 0.17                                | -0.15 ± 0.25                                 | 0.03 ± 0.28                                  |

Table 66: MM-to-QM unbound-state ligand binding free energy correction values 6- $\lambda$  states simulated for 100 ps

| Molec. | MM'  | $\Delta G_{\text{TI3}}^{N_\lambda=11}$ | $\Delta \Delta G_{\text{TI}}^{N_\lambda=6}$ | $\Delta \Delta G_{\text{BAR}}^{N_\lambda=6}$ | $\Delta \Delta G_{\text{IEXP}}^{N_\lambda=5}$ | $\Delta \Delta G_{\text{DEXP}}^{N_\lambda=5}$ |
|--------|------|----------------------------------------|---------------------------------------------|----------------------------------------------|-----------------------------------------------|-----------------------------------------------|
| BNZ    |      | -145560.88 $\pm$ 0.02                  | 0.02 $\pm$ 0.05                             | 0.02 $\pm$ 0.04                              | 0.04 $\pm$ 0.06                               | -0.01 $\pm$ 0.06                              |
|        | b    | -145561.34 $\pm$ 0.02                  | 0.11 $\pm$ 0.04                             | 0.11 $\pm$ 0.04                              | 0.12 $\pm$ 0.05                               | 0.10 $\pm$ 0.05                               |
|        | ba   | -145565.50 $\pm$ 0.02                  | 0.03 $\pm$ 0.04                             | 0.03 $\pm$ 0.04                              | 0.04 $\pm$ 0.05                               | 0.02 $\pm$ 0.05                               |
|        | bad  | -145565.89 $\pm$ 0.02                  | 0.09 $\pm$ 0.04                             | 0.09 $\pm$ 0.04                              | 0.09 $\pm$ 0.05                               | 0.07 $\pm$ 0.05                               |
|        | badq | -145567.87 $\pm$ 0.02                  | -0.02 $\pm$ 0.04                            | -0.02 $\pm$ 0.05                             | -0.01 $\pm$ 0.08                              | -0.03 $\pm$ 0.07                              |
| PXY    |      | -194836.27 $\pm$ 0.03                  | -0.06 $\pm$ 0.07                            | -0.06 $\pm$ 0.06                             | -0.07 $\pm$ 0.08                              | -0.06 $\pm$ 0.08                              |
|        | b    | -194836.91 $\pm$ 0.03                  | 0.11 $\pm$ 0.07                             | 0.09 $\pm$ 0.06                              | 0.05 $\pm$ 0.09                               | 0.14 $\pm$ 0.08                               |
|        | ba   | -194843.73 $\pm$ 0.02                  | 0.00 $\pm$ 0.05                             | 0.00 $\pm$ 0.04                              | -0.03 $\pm$ 0.06                              | 0.04 $\pm$ 0.06                               |
|        | bad  | -194843.91 $\pm$ 0.03                  | -0.09 $\pm$ 0.06                            | -0.09 $\pm$ 0.05                             | -0.13 $\pm$ 0.07                              | -0.06 $\pm$ 0.08                              |
|        | badq | -194849.04 $\pm$ 0.05                  | 0.01 $\pm$ 0.12                             | 0.00 $\pm$ 0.14                              | 0.14 $\pm$ 0.25                               | -0.03 $\pm$ 0.23                              |
| I4B    |      | -244115.78 $\pm$ 0.03                  | 0.07 $\pm$ 0.08                             | 0.08 $\pm$ 0.06                              | 0.05 $\pm$ 0.09                               | 0.15 $\pm$ 0.08                               |
|        | b    | -244116.51 $\pm$ 0.03                  | -0.12 $\pm$ 0.07                            | -0.10 $\pm$ 0.06                             | -0.11 $\pm$ 0.09                              | -0.08 $\pm$ 0.09                              |
|        | ba   | -244120.47 $\pm$ 0.03                  | 0.04 $\pm$ 0.07                             | 0.04 $\pm$ 0.07                              | 0.07 $\pm$ 0.09                               | 0.03 $\pm$ 0.09                               |
|        | bad  | -244120.69 $\pm$ 0.03                  | 0.20 $\pm$ 0.07                             | 0.19 $\pm$ 0.06                              | 0.19 $\pm$ 0.09                               | 0.19 $\pm$ 0.09                               |
|        | badq | -244118.97 $\pm$ 0.05                  | 0.01 $\pm$ 0.10                             | 0.00 $\pm$ 0.10                              | 0.01 $\pm$ 0.15                               | 0.02 $\pm$ 0.15                               |
| BZF    |      | -240488.93 $\pm$ 0.05                  | -0.04 $\pm$ 0.11                            | -0.04 $\pm$ 0.09                             | -0.10 $\pm$ 0.14                              | 0.07 $\pm$ 0.13                               |
|        | b    | -240488.68 $\pm$ 0.06                  | 0.17 $\pm$ 0.13                             | 0.16 $\pm$ 0.11                              | 0.22 $\pm$ 0.17                               | 0.15 $\pm$ 0.16                               |
|        | ba   | -240530.60 $\pm$ 0.04                  | 0.11 $\pm$ 0.08                             | 0.11 $\pm$ 0.08                              | 0.19 $\pm$ 0.12                               | 0.05 $\pm$ 0.10                               |
|        | bad  | -240530.12 $\pm$ 0.04                  | -0.08 $\pm$ 0.08                            | -0.05 $\pm$ 0.07                             | -0.11 $\pm$ 0.10                              | 0.00 $\pm$ 0.09                               |
|        | badq | -240532.72 $\pm$ 0.04                  | -0.05 $\pm$ 0.10                            | -0.05 $\pm$ 0.08                             | -0.15 $\pm$ 0.12                              | -0.01 $\pm$ 0.12                              |
| DEN    |      | -217978.56 $\pm$ 0.04                  | -0.05 $\pm$ 0.10                            | -0.06 $\pm$ 0.09                             | -0.04 $\pm$ 0.14                              | -0.10 $\pm$ 0.13                              |
|        | b    | -217978.34 $\pm$ 0.04                  | 0.01 $\pm$ 0.09                             | 0.00 $\pm$ 0.09                              | -0.06 $\pm$ 0.14                              | 0.10 $\pm$ 0.12                               |
|        | ba   | -218030.69 $\pm$ 0.03                  | -0.14 $\pm$ 0.08                            | -0.13 $\pm$ 0.09                             | -0.10 $\pm$ 0.16                              | -0.19 $\pm$ 0.17                              |

*Continued on next page*

Table 66 – Continued from previous page

| Molec. | MM'  | $\Delta G_{\text{TI3}}^{N_{\lambda}=11}$ | $\Delta\Delta G_{\text{TI}}^{N_{\lambda}=6}$ | $\Delta\Delta G_{\text{BAR}}^{N_{\lambda}=6}$ | $\Delta\Delta G_{\text{IEXP}}^{N_{\lambda}=5}$ | $\Delta\Delta G_{\text{DEXP}}^{N_{\lambda}=5}$ |
|--------|------|------------------------------------------|----------------------------------------------|-----------------------------------------------|------------------------------------------------|------------------------------------------------|
|        | bad  | -218028.60 ± 0.03                        | 0.06 ± 0.07                                  | 0.05 ± 0.07                                   | 0.04 ± 0.12                                    | 0.07 ± 0.09                                    |
|        | badq | -218029.62 ± 0.03                        | 0.09 ± 0.07                                  | 0.09 ± 0.06                                   | 0.07 ± 0.09                                    | 0.13 ± 0.08                                    |
| IND    |      | -228035.76 ± 0.06                        | 0.04 ± 0.13                                  | 0.03 ± 0.13                                   | 0.07 ± 0.27                                    | 0.12 ± 0.22                                    |
|        | b    | -228035.97 ± 0.06                        | -0.19 ± 0.14                                 | -0.20 ± 0.12                                  | -0.11 ± 0.20                                   | -0.03 ± 0.16                                   |
|        | ba   | -228075.42 ± 0.05                        | 0.08 ± 0.11                                  | 0.06 ± 0.10                                   | 0.04 ± 0.17                                    | 0.16 ± 0.15                                    |
|        | bad  | -228077.63 ± 0.04                        | -0.11 ± 0.10                                 | -0.12 ± 0.09                                  | -0.21 ± 0.14                                   | -0.02 ± 0.13                                   |
|        | badq | -228062.14 ± 0.10                        | 0.24 ± 0.22                                  | 0.16 ± 0.23                                   | -0.34 ± 0.36                                   | 0.90 ± 0.33                                    |
| OXE    |      | -194838.45 ± 0.03                        | -0.06 ± 0.08                                 | -0.04 ± 0.07                                  | -0.04 ± 0.09                                   | -0.07 ± 0.09                                   |
|        | b    | -194839.14 ± 0.03                        | 0.00 ± 0.07                                  | 0.01 ± 0.05                                   | -0.04 ± 0.07                                   | 0.06 ± 0.07                                    |
|        | ba   | -194846.72 ± 0.03                        | 0.05 ± 0.07                                  | 0.05 ± 0.06                                   | 0.08 ± 0.09                                    | 0.00 ± 0.09                                    |
|        | bad  | -194847.04 ± 0.03                        | 0.12 ± 0.07                                  | 0.13 ± 0.06                                   | 0.13 ± 0.07                                    | 0.12 ± 0.09                                    |
|        | badq | -194845.65 ± 0.04                        | 0.15 ± 0.09                                  | 0.16 ± 0.09                                   | 0.10 ± 0.14                                    | 0.23 ± 0.13                                    |
| N4B    |      | -244115.61 ± 0.05                        | 0.17 ± 0.09                                  | 0.16 ± 0.08                                   | 0.12 ± 0.10                                    | 0.20 ± 0.10                                    |
|        | b    | -244116.29 ± 0.03                        | 0.00 ± 0.07                                  | 0.02 ± 0.06                                   | -0.07 ± 0.09                                   | 0.10 ± 0.10                                    |
|        | ba   | -244122.82 ± 0.03                        | 0.22 ± 0.07                                  | 0.21 ± 0.06                                   | 0.17 ± 0.09                                    | 0.22 ± 0.09                                    |
|        | bad  | -244123.36 ± 0.03                        | -0.14 ± 0.08                                 | -0.12 ± 0.06                                  | -0.07 ± 0.09                                   | -0.23 ± 0.16                                   |
|        | badq | -244115.45 ± 0.04                        | 0.10 ± 0.09                                  | 0.12 ± 0.08                                   | 0.08 ± 0.12                                    | 0.27 ± 0.11                                    |

Table 67: MM-to-QM unbound-state ligand binding free energy correction values 2- $\lambda$  states simulated for 50 ps

| Molec. | MM'  | $\Delta G_{\text{TI3}}^{N_\lambda=11}$ | $\Delta\Delta G_{\text{TI}}^{N_\lambda=2}$ | $\Delta\Delta G_{\text{BAR}}^{N_\lambda=2}$ | $\Delta\Delta G_{\text{IEXP}}^{N_\lambda=1}$ | $\Delta\Delta G_{\text{DEXP}}^{N_\lambda=1}$ |
|--------|------|----------------------------------------|--------------------------------------------|---------------------------------------------|----------------------------------------------|----------------------------------------------|
| BNZ    |      | -145560.88 $\pm$ 0.02                  | -0.03 $\pm$ 0.12                           | -0.08 $\pm$ 0.13                            | -0.03 $\pm$ 0.31                             | -0.29 $\pm$ 0.23                             |
|        | b    | -145561.34 $\pm$ 0.02                  | 0.32 $\pm$ 0.10                            | 0.27 $\pm$ 0.12                             | -0.17 $\pm$ 0.16                             | 0.44 $\pm$ 0.12                              |
|        | ba   | -145565.50 $\pm$ 0.02                  | 0.17 $\pm$ 0.08                            | 0.17 $\pm$ 0.12                             | -0.13 $\pm$ 0.16                             | 0.46 $\pm$ 0.20                              |
|        | bad  | -145565.89 $\pm$ 0.02                  | 0.18 $\pm$ 0.10                            | 0.12 $\pm$ 0.10                             | -0.06 $\pm$ 0.13                             | 0.04 $\pm$ 0.17                              |
|        | badq | -145567.87 $\pm$ 0.02                  | -0.08 $\pm$ 0.09                           | -0.05 $\pm$ 0.12                            | -0.35 $\pm$ 0.18                             | 0.30 $\pm$ 0.14                              |
| PXY    |      | -194836.27 $\pm$ 0.03                  | -0.06 $\pm$ 0.15                           | -0.07 $\pm$ 0.18                            | 0.17 $\pm$ 0.36                              | -0.71 $\pm$ 0.46                             |
|        | b    | -194836.91 $\pm$ 0.03                  | 0.14 $\pm$ 0.15                            | 0.18 $\pm$ 0.18                             | 0.26 $\pm$ 0.31                              | 0.32 $\pm$ 0.27                              |
|        | ba   | -194843.73 $\pm$ 0.02                  | 0.27 $\pm$ 0.12                            | 0.25 $\pm$ 0.12                             | 0.34 $\pm$ 0.30                              | 0.46 $\pm$ 0.15                              |
|        | bad  | -194843.91 $\pm$ 0.03                  | 0.31 $\pm$ 0.13                            | 0.24 $\pm$ 0.13                             | 0.34 $\pm$ 0.31                              | 0.26 $\pm$ 0.15                              |
|        | badq | -194849.04 $\pm$ 0.05                  | -0.10 $\pm$ 0.26                           | -0.06 $\pm$ 0.50                            | -1.57 $\pm$ 0.48                             | 1.08 $\pm$ 0.40                              |
| I4B    |      | -244115.78 $\pm$ 0.03                  | -0.24 $\pm$ 0.18                           | -0.16 $\pm$ 0.20                            | -0.06 $\pm$ 0.38                             | 0.53 $\pm$ 0.19                              |
|        | b    | -244116.51 $\pm$ 0.03                  | -0.15 $\pm$ 0.15                           | -0.15 $\pm$ 0.23                            | -0.24 $\pm$ 0.36                             | 0.03 $\pm$ 0.31                              |
|        | ba   | -244120.47 $\pm$ 0.03                  | -0.29 $\pm$ 0.15                           | -0.35 $\pm$ 0.17                            | -0.31 $\pm$ 0.35                             | 0.04 $\pm$ 0.18                              |
|        | bad  | -244120.69 $\pm$ 0.03                  | -0.10 $\pm$ 0.14                           | -0.06 $\pm$ 0.20                            | -0.27 $\pm$ 0.32                             | 0.51 $\pm$ 0.25                              |
|        | badq | -244118.97 $\pm$ 0.05                  | -0.09 $\pm$ 0.23                           | 0.65 $\pm$ 0.50                             | -0.70 $\pm$ 0.48                             | 2.53 $\pm$ 0.33                              |
| BZF    |      | -240488.93 $\pm$ 0.05                  | -0.09 $\pm$ 0.31                           | 0.48 $\pm$ 0.41                             | 0.64 $\pm$ 0.49                              | 1.34 $\pm$ 0.47                              |
|        | b    | -240488.68 $\pm$ 0.06                  | -0.19 $\pm$ 0.34                           | -0.57 $\pm$ 0.39                            | -1.06 $\pm$ 0.46                             | 0.31 $\pm$ 0.36                              |
|        | ba   | -240530.60 $\pm$ 0.04                  | -0.10 $\pm$ 0.16                           | -0.02 $\pm$ 0.23                            | -0.70 $\pm$ 0.23                             | 0.24 $\pm$ 0.33                              |
|        | bad  | -240530.12 $\pm$ 0.04                  | 0.00 $\pm$ 0.19                            | -0.03 $\pm$ 0.20                            | -0.77 $\pm$ 0.21                             | 0.82 $\pm$ 0.22                              |
|        | badq | -240532.72 $\pm$ 0.04                  | -0.32 $\pm$ 0.29                           | 0.17 $\pm$ 0.39                             | -1.10 $\pm$ 0.33                             | 1.45 $\pm$ 0.38                              |
| DEN    |      | -217978.56 $\pm$ 0.04                  | 0.12 $\pm$ 0.20                            | 0.05 $\pm$ 0.38                             | -0.82 $\pm$ 0.37                             | -0.21 $\pm$ 0.24                             |
|        | b    | -217978.34 $\pm$ 0.04                  | 0.57 $\pm$ 0.22                            | 0.26 $\pm$ 0.31                             | -1.18 $\pm$ 0.24                             | 1.48 $\pm$ 0.28                              |
|        | ba   | -218030.69 $\pm$ 0.03                  | -0.05 $\pm$ 0.14                           | -0.09 $\pm$ 0.19                            | -0.42 $\pm$ 0.39                             | 0.28 $\pm$ 0.21                              |

*Continued on next page*

Table 67 – Continued from previous page

| Molec. | MM'  | $\Delta G_{\text{TI3}}^{N_i=11}$ | $\Delta\Delta G_{\text{TI}}^{N_i=2}$ | $\Delta\Delta G_{\text{BAR}}^{N_i=2}$ | $\Delta\Delta G_{\text{IEXP}}^{N_i=1}$ | $\Delta\Delta G_{\text{DEXP}}^{N_i=1}$ |
|--------|------|----------------------------------|--------------------------------------|---------------------------------------|----------------------------------------|----------------------------------------|
|        | bad  | -218028.60 ± 0.03                | 0.29 ± 0.13                          | 0.30 ± 0.24                           | -0.42 ± 0.37                           | 0.95 ± 0.26                            |
|        | badq | -218029.62 ± 0.03                | 0.00 ± 0.14                          | 0.17 ± 0.16                           | 0.16 ± 0.23                            | 0.44 ± 0.21                            |
| IND    |      | -228035.76 ± 0.06                | 0.50 ± 0.31                          | 0.90 ± 0.39                           | -2.14 ± 0.28                           | 3.94 ± 0.30                            |
|        | b    | -228035.97 ± 0.06                | 0.06 ± 0.28                          | 0.29 ± 0.53                           | -3.04 ± 0.45                           | 3.64 ± 0.31                            |
|        | ba   | -228075.42 ± 0.05                | 0.12 ± 0.26                          | 0.33 ± 0.38                           | -0.26 ± 0.54                           | 1.56 ± 0.38                            |
|        | bad  | -228077.63 ± 0.04                | 0.02 ± 0.28                          | -0.01 ± 0.30                          | -0.18 ± 0.45                           | -1.80 ± 0.25                           |
|        | badq | -228062.14 ± 0.10                | -2.93 ± 0.56                         | -1.20 ± 0.81                          | -12.12 ± 0.58                          | 9.72 ± 0.56                            |
| OXE    |      | -194838.45 ± 0.03                | -0.50 ± 0.17                         | -0.43 ± 0.20                          | -0.97 ± 0.19                           | -0.21 ± 0.31                           |
|        | b    | -194839.14 ± 0.03                | -0.43 ± 0.16                         | -0.31 ± 0.23                          | 0.03 ± 0.51                            | 0.18 ± 0.16                            |
|        | ba   | -194846.72 ± 0.03                | -0.27 ± 0.16                         | -0.20 ± 0.18                          | -0.51 ± 0.21                           | 0.36 ± 0.19                            |
|        | bad  | -194847.04 ± 0.03                | -0.27 ± 0.14                         | -0.07 ± 0.17                          | -0.48 ± 0.42                           | 0.73 ± 0.16                            |
|        | badq | -194845.65 ± 0.04                | -0.92 ± 0.24                         | -0.28 ± 0.48                          | -0.86 ± 0.54                           | 0.67 ± 0.49                            |
| N4B    |      | -244115.61 ± 0.05                | 0.27 ± 0.20                          | 0.36 ± 0.34                           | 0.49 ± 0.51                            | -0.60 ± 0.50                           |
|        | b    | -244116.29 ± 0.03                | 0.50 ± 0.18                          | 0.48 ± 0.29                           | 0.73 ± 0.38                            | 0.18 ± 0.34                            |
|        | ba   | -244122.82 ± 0.03                | 0.83 ± 0.16                          | 0.81 ± 0.26                           | 0.11 ± 0.34                            | 1.29 ± 0.33                            |
|        | bad  | -244123.36 ± 0.03                | 0.24 ± 0.14                          | 0.33 ± 0.20                           | 0.19 ± 0.24                            | -0.62 ± 0.52                           |
|        | badq | -244115.45 ± 0.04                | -0.31 ± 0.23                         | -0.37 ± 0.44                          | -1.97 ± 0.24                           | 0.82 ± 0.39                            |



Table 68: MM-to-QM unbound-state ligand binding free energy correction values 3- $\lambda$  states simulated for 50 ps

| Molec. | MM'  | $\Delta G_{\text{TI3}}^{N_\lambda=11}$ | $\Delta\Delta G_{\text{TI}}^{N_\lambda=3}$ | $\Delta\Delta G_{\text{BAR}}^{N_\lambda=3}$ | $\Delta\Delta G_{\text{IEXP}}^{N_\lambda=2}$ | $\Delta\Delta G_{\text{DEXP}}^{N_\lambda=2}$ |
|--------|------|----------------------------------------|--------------------------------------------|---------------------------------------------|----------------------------------------------|----------------------------------------------|
| BNZ    |      | -145560.88 $\pm$ 0.02                  | -0.08 $\pm$ 0.11                           | -0.08 $\pm$ 0.09                            | -0.07 $\pm$ 0.14                             | -0.16 $\pm$ 0.14                             |
|        | b    | -145561.34 $\pm$ 0.02                  | 0.07 $\pm$ 0.11                            | 0.10 $\pm$ 0.09                             | 0.09 $\pm$ 0.20                              | 0.17 $\pm$ 0.11                              |
|        | ba   | -145565.50 $\pm$ 0.02                  | 0.12 $\pm$ 0.10                            | 0.14 $\pm$ 0.09                             | 0.07 $\pm$ 0.11                              | 0.17 $\pm$ 0.15                              |
|        | bad  | -145565.89 $\pm$ 0.02                  | 0.17 $\pm$ 0.07                            | 0.16 $\pm$ 0.06                             | 0.03 $\pm$ 0.08                              | 0.23 $\pm$ 0.09                              |
|        | badq | -145567.87 $\pm$ 0.02                  | 0.10 $\pm$ 0.10                            | 0.07 $\pm$ 0.10                             | -0.03 $\pm$ 0.14                             | 0.17 $\pm$ 0.16                              |
| PXY    |      | -194836.27 $\pm$ 0.03                  | -0.21 $\pm$ 0.17                           | -0.14 $\pm$ 0.17                            | 0.02 $\pm$ 0.27                              | -0.60 $\pm$ 0.37                             |
|        | b    | -194836.91 $\pm$ 0.03                  | 0.09 $\pm$ 0.14                            | 0.13 $\pm$ 0.15                             | 0.07 $\pm$ 0.20                              | 0.13 $\pm$ 0.26                              |
|        | ba   | -194843.73 $\pm$ 0.02                  | 0.09 $\pm$ 0.13                            | 0.11 $\pm$ 0.09                             | 0.30 $\pm$ 0.22                              | 0.06 $\pm$ 0.15                              |
|        | bad  | -194843.91 $\pm$ 0.03                  | -0.01 $\pm$ 0.11                           | 0.04 $\pm$ 0.09                             | 0.05 $\pm$ 0.14                              | -0.03 $\pm$ 0.15                             |
|        | badq | -194849.04 $\pm$ 0.05                  | -0.08 $\pm$ 0.25                           | 0.07 $\pm$ 0.24                             | -0.36 $\pm$ 0.34                             | -0.21 $\pm$ 0.40                             |
| I4B    |      | -244115.78 $\pm$ 0.03                  | -0.18 $\pm$ 0.20                           | -0.18 $\pm$ 0.13                            | 0.04 $\pm$ 0.23                              | -0.35 $\pm$ 0.22                             |
|        | b    | -244116.51 $\pm$ 0.03                  | -0.11 $\pm$ 0.16                           | -0.13 $\pm$ 0.13                            | -0.05 $\pm$ 0.20                             | -0.09 $\pm$ 0.19                             |
|        | ba   | -244120.47 $\pm$ 0.03                  | 0.08 $\pm$ 0.13                            | -0.02 $\pm$ 0.12                            | 0.02 $\pm$ 0.29                              | 0.15 $\pm$ 0.16                              |
|        | bad  | -244120.69 $\pm$ 0.03                  | 0.01 $\pm$ 0.14                            | -0.03 $\pm$ 0.14                            | -0.04 $\pm$ 0.20                             | 0.21 $\pm$ 0.18                              |
|        | badq | -244118.97 $\pm$ 0.05                  | 0.36 $\pm$ 0.20                            | 0.35 $\pm$ 0.23                             | -0.17 $\pm$ 0.32                             | 1.01 $\pm$ 0.44                              |
| BZF    |      | -240488.93 $\pm$ 0.05                  | -0.29 $\pm$ 0.26                           | -0.16 $\pm$ 0.21                            | 0.11 $\pm$ 0.41                              | -0.14 $\pm$ 0.29                             |
|        | b    | -240488.68 $\pm$ 0.06                  | 0.17 $\pm$ 0.27                            | 0.01 $\pm$ 0.22                             | 0.17 $\pm$ 0.40                              | 0.10 $\pm$ 0.30                              |
|        | ba   | -240530.60 $\pm$ 0.04                  | 0.03 $\pm$ 0.17                            | 0.02 $\pm$ 0.16                             | -0.05 $\pm$ 0.19                             | 0.06 $\pm$ 0.23                              |
|        | bad  | -240530.12 $\pm$ 0.04                  | -0.05 $\pm$ 0.16                           | -0.08 $\pm$ 0.14                            | -0.39 $\pm$ 0.18                             | 0.27 $\pm$ 0.18                              |
|        | badq | -240532.72 $\pm$ 0.04                  | -0.33 $\pm$ 0.19                           | -0.17 $\pm$ 0.21                            | -0.68 $\pm$ 0.22                             | 0.33 $\pm$ 0.33                              |
| DEN    |      | -217978.56 $\pm$ 0.04                  | 0.39 $\pm$ 0.24                            | 0.34 $\pm$ 0.23                             | 0.52 $\pm$ 0.31                              | -0.05 $\pm$ 0.25                             |
|        | b    | -217978.34 $\pm$ 0.04                  | 0.10 $\pm$ 0.22                            | 0.17 $\pm$ 0.18                             | 0.03 $\pm$ 0.35                              | 0.02 $\pm$ 0.39                              |
|        | ba   | -218030.69 $\pm$ 0.03                  | -0.11 $\pm$ 0.16                           | -0.10 $\pm$ 0.13                            | -0.12 $\pm$ 0.21                             | -0.18 $\pm$ 0.16                             |

*Continued on next page*

Table 68 – Continued from previous page

| Molec. | MM'  | $\Delta G_{\text{TI3}}^{N_i=11}$ | $\Delta\Delta G_{\text{TI}}^{N_i=3}$ | $\Delta\Delta G_{\text{BAR}}^{N_i=3}$ | $\Delta\Delta G_{\text{IEXP}}^{N_i=2}$ | $\Delta\Delta G_{\text{DEXP}}^{N_i=2}$ |
|--------|------|----------------------------------|--------------------------------------|---------------------------------------|----------------------------------------|----------------------------------------|
|        | bad  | -218028.60 ± 0.03                | 0.24 ± 0.13                          | 0.27 ± 0.13                           | -0.03 ± 0.20                           | 0.40 ± 0.17                            |
|        | badq | -218029.62 ± 0.03                | 0.22 ± 0.18                          | 0.26 ± 0.11                           | 0.36 ± 0.17                            | -0.99 ± 0.53                           |
| IND    |      | -228035.76 ± 0.06                | 0.08 ± 0.27                          | 0.28 ± 0.26                           | -0.37 ± 0.36                           | 1.37 ± 0.29                            |
|        | b    | -228035.97 ± 0.06                | 0.27 ± 0.27                          | 0.22 ± 0.26                           | -0.41 ± 0.50                           | 1.40 ± 0.26                            |
|        | ba   | -228075.42 ± 0.05                | 0.28 ± 0.21                          | 0.20 ± 0.18                           | 0.08 ± 0.33                            | 0.58 ± 0.29                            |
|        | bad  | -228077.63 ± 0.04                | -0.01 ± 0.22                         | -0.02 ± 0.20                          | -0.06 ± 0.32                           | -0.92 ± 0.25                           |
|        | badq | -228062.14 ± 0.10                | -0.63 ± 0.44                         | 0.20 ± 0.81                           | -4.04 ± 0.75                           | 4.38 ± 0.49                            |
| OXE    |      | -194838.45 ± 0.03                | -0.14 ± 0.16                         | -0.18 ± 0.15                          | -0.21 ± 0.19                           | -0.15 ± 0.19                           |
|        | b    | -194839.14 ± 0.03                | 0.14 ± 0.15                          | 0.06 ± 0.14                           | 0.18 ± 0.35                            | 0.11 ± 0.15                            |
|        | ba   | -194846.72 ± 0.03                | -0.13 ± 0.16                         | -0.13 ± 0.12                          | -0.16 ± 0.17                           | -0.07 ± 0.17                           |
|        | bad  | -194847.04 ± 0.03                | -0.05 ± 0.15                         | -0.04 ± 0.12                          | -0.10 ± 0.20                           | 0.12 ± 0.14                            |
|        | badq | -194845.65 ± 0.04                | -0.02 ± 0.21                         | -0.06 ± 0.21                          | -0.12 ± 0.40                           | 0.39 ± 0.28                            |
| N4B    |      | -244115.61 ± 0.05                | 0.37 ± 0.17                          | 0.39 ± 0.16                           | 0.51 ± 0.32                            | 0.05 ± 0.35                            |
|        | b    | -244116.29 ± 0.03                | 0.24 ± 0.19                          | 0.29 ± 0.16                           | 0.73 ± 0.27                            | -0.03 ± 0.29                           |
|        | ba   | -244122.82 ± 0.03                | 0.51 ± 0.14                          | 0.57 ± 0.13                           | 0.34 ± 0.19                            | 0.69 ± 0.21                            |
|        | bad  | -244123.36 ± 0.03                | 0.18 ± 0.13                          | 0.20 ± 0.12                           | 0.25 ± 0.19                            | 0.06 ± 0.24                            |
|        | badq | -244115.45 ± 0.04                | -0.25 ± 0.20                         | -0.21 ± 0.23                          | -0.51 ± 0.35                           | 0.20 ± 0.29                            |

Table 69: MM-to-QM unbound-state ligand binding free energy correction values 6- $\lambda$  states simulated for 50 ps

| Molec. | MM'  | $\Delta G_{\text{TI3}}^{N_\lambda=11}$ | $\Delta \Delta G_{\text{TI}}^{N_\lambda=6}$ | $\Delta \Delta G_{\text{BAR}}^{N_\lambda=6}$ | $\Delta \Delta G_{\text{IEXP}}^{N_\lambda=5}$ | $\Delta \Delta G_{\text{DEXP}}^{N_\lambda=5}$ |
|--------|------|----------------------------------------|---------------------------------------------|----------------------------------------------|-----------------------------------------------|-----------------------------------------------|
| BNZ    |      | -145560.88 $\pm$ 0.02                  | -0.02 $\pm$ 0.07                            | -0.02 $\pm$ 0.06                             | 0.01 $\pm$ 0.08                               | -0.06 $\pm$ 0.08                              |
|        | b    | -145561.34 $\pm$ 0.02                  | 0.02 $\pm$ 0.07                             | 0.04 $\pm$ 0.06                              | 0.00 $\pm$ 0.09                               | 0.07 $\pm$ 0.08                               |
|        | ba   | -145565.50 $\pm$ 0.02                  | 0.02 $\pm$ 0.06                             | 0.02 $\pm$ 0.05                              | -0.01 $\pm$ 0.08                              | 0.03 $\pm$ 0.07                               |
|        | bad  | -145565.89 $\pm$ 0.02                  | 0.13 $\pm$ 0.05                             | 0.13 $\pm$ 0.05                              | 0.09 $\pm$ 0.06                               | 0.15 $\pm$ 0.07                               |
|        | badq | -145567.87 $\pm$ 0.02                  | 0.01 $\pm$ 0.07                             | 0.00 $\pm$ 0.07                              | -0.02 $\pm$ 0.09                              | 0.03 $\pm$ 0.09                               |
| PXY    |      | -194836.27 $\pm$ 0.03                  | 0.01 $\pm$ 0.09                             | 0.00 $\pm$ 0.08                              | 0.00 $\pm$ 0.09                               | -0.03 $\pm$ 0.12                              |
|        | b    | -194836.91 $\pm$ 0.03                  | -0.15 $\pm$ 0.09                            | -0.12 $\pm$ 0.08                             | -0.14 $\pm$ 0.13                              | -0.09 $\pm$ 0.11                              |
|        | ba   | -194843.73 $\pm$ 0.02                  | 0.05 $\pm$ 0.08                             | 0.06 $\pm$ 0.06                              | 0.11 $\pm$ 0.10                               | 0.01 $\pm$ 0.10                               |
|        | bad  | -194843.91 $\pm$ 0.03                  | 0.12 $\pm$ 0.09                             | 0.14 $\pm$ 0.07                              | 0.16 $\pm$ 0.09                               | 0.09 $\pm$ 0.09                               |
|        | badq | -194849.04 $\pm$ 0.05                  | -0.19 $\pm$ 0.15                            | -0.15 $\pm$ 0.13                             | -0.25 $\pm$ 0.18                              | -0.10 $\pm$ 0.20                              |
| I4B    |      | -244115.78 $\pm$ 0.03                  | 0.01 $\pm$ 0.10                             | 0.01 $\pm$ 0.08                              | -0.01 $\pm$ 0.10                              | 0.05 $\pm$ 0.11                               |
|        | b    | -244116.51 $\pm$ 0.03                  | -0.29 $\pm$ 0.10                            | -0.28 $\pm$ 0.09                             | -0.26 $\pm$ 0.14                              | -0.27 $\pm$ 0.13                              |
|        | ba   | -244120.47 $\pm$ 0.03                  | -0.06 $\pm$ 0.09                            | -0.06 $\pm$ 0.07                             | -0.08 $\pm$ 0.09                              | -0.04 $\pm$ 0.09                              |
|        | bad  | -244120.69 $\pm$ 0.03                  | 0.09 $\pm$ 0.09                             | 0.08 $\pm$ 0.08                              | 0.06 $\pm$ 0.10                               | 0.11 $\pm$ 0.11                               |
|        | badq | -244118.97 $\pm$ 0.05                  | 0.14 $\pm$ 0.15                             | 0.16 $\pm$ 0.13                              | 0.02 $\pm$ 0.17                               | 0.31 $\pm$ 0.21                               |
| BZF    |      | -240488.93 $\pm$ 0.05                  | -0.19 $\pm$ 0.16                            | -0.17 $\pm$ 0.13                             | -0.14 $\pm$ 0.21                              | -0.16 $\pm$ 0.19                              |
|        | b    | -240488.68 $\pm$ 0.06                  | -0.08 $\pm$ 0.16                            | -0.11 $\pm$ 0.14                             | -0.19 $\pm$ 0.20                              | -0.07 $\pm$ 0.20                              |
|        | ba   | -240530.60 $\pm$ 0.04                  | 0.11 $\pm$ 0.11                             | 0.08 $\pm$ 0.10                              | 0.05 $\pm$ 0.16                               | 0.12 $\pm$ 0.13                               |
|        | bad  | -240530.12 $\pm$ 0.04                  | 0.08 $\pm$ 0.12                             | 0.05 $\pm$ 0.11                              | 0.06 $\pm$ 0.16                               | 0.04 $\pm$ 0.17                               |
|        | badq | -240532.72 $\pm$ 0.04                  | 0.05 $\pm$ 0.14                             | 0.06 $\pm$ 0.13                              | 0.01 $\pm$ 0.16                               | 0.16 $\pm$ 0.18                               |
| DEN    |      | -217978.56 $\pm$ 0.04                  | 0.15 $\pm$ 0.16                             | 0.19 $\pm$ 0.12                              | 0.29 $\pm$ 0.17                               | -0.27 $\pm$ 0.16                              |
|        | b    | -217978.34 $\pm$ 0.04                  | -0.03 $\pm$ 0.14                            | -0.03 $\pm$ 0.12                             | -0.09 $\pm$ 0.17                              | 0.02 $\pm$ 0.16                               |
|        | ba   | -218030.69 $\pm$ 0.03                  | -0.25 $\pm$ 0.09                            | -0.24 $\pm$ 0.08                             | -0.24 $\pm$ 0.12                              | -0.24 $\pm$ 0.10                              |

*Continued on next page*

Table 69 – Continued from previous page

| Molec. | MM'  | $\Delta G_{\text{TI3}}^{N_{\lambda}=11}$ | $\Delta\Delta G_{\text{TI}}^{N_{\lambda}=6}$ | $\Delta\Delta G_{\text{BAR}}^{N_{\lambda}=6}$ | $\Delta\Delta G_{\text{IEXP}}^{N_{\lambda}=5}$ | $\Delta\Delta G_{\text{DEXP}}^{N_{\lambda}=5}$ |
|--------|------|------------------------------------------|----------------------------------------------|-----------------------------------------------|------------------------------------------------|------------------------------------------------|
|        | bad  | -218028.60 ± 0.03                        | -0.27 ± 0.09                                 | -0.25 ± 0.09                                  | -0.30 ± 0.13                                   | -0.20 ± 0.12                                   |
|        | badq | -218029.62 ± 0.03                        | 0.30 ± 0.09                                  | 0.29 ± 0.08                                   | 0.31 ± 0.11                                    | 0.32 ± 0.10                                    |
| IND    |      | -228035.76 ± 0.06                        | 0.12 ± 0.20                                  | 0.13 ± 0.16                                   | 0.27 ± 0.23                                    | 0.26 ± 0.23                                    |
|        | b    | -228035.97 ± 0.06                        | -0.38 ± 0.18                                 | -0.35 ± 0.14                                  | -0.52 ± 0.23                                   | -0.02 ± 0.18                                   |
|        | ba   | -228075.42 ± 0.05                        | 0.16 ± 0.16                                  | 0.16 ± 0.12                                   | 0.29 ± 0.22                                    | 0.10 ± 0.20                                    |
|        | bad  | -228077.63 ± 0.04                        | 0.08 ± 0.15                                  | 0.05 ± 0.12                                   | 0.12 ± 0.17                                    | -0.06 ± 0.16                                   |
|        | badq | -228062.14 ± 0.10                        | 0.12 ± 0.29                                  | 0.23 ± 0.32                                   | -1.03 ± 0.44                                   | 1.16 ± 0.47                                    |
| OXE    |      | -194838.45 ± 0.03                        | 0.06 ± 0.09                                  | 0.04 ± 0.09                                   | -0.01 ± 0.11                                   | 0.09 ± 0.10                                    |
|        | b    | -194839.14 ± 0.03                        | -0.12 ± 0.09                                 | -0.15 ± 0.09                                  | -0.15 ± 0.15                                   | -0.12 ± 0.11                                   |
|        | ba   | -194846.72 ± 0.03                        | 0.10 ± 0.09                                  | 0.08 ± 0.08                                   | 0.00 ± 0.11                                    | 0.17 ± 0.11                                    |
|        | bad  | -194847.04 ± 0.03                        | 0.07 ± 0.09                                  | 0.06 ± 0.08                                   | -0.02 ± 0.10                                   | 0.15 ± 0.13                                    |
|        | badq | -194845.65 ± 0.04                        | -0.11 ± 0.16                                 | -0.12 ± 0.14                                  | -0.01 ± 0.22                                   | -0.15 ± 0.20                                   |
| N4B    |      | -244115.61 ± 0.05                        | 0.24 ± 0.11                                  | 0.23 ± 0.10                                   | 0.25 ± 0.15                                    | 0.18 ± 0.16                                    |
|        | b    | -244116.29 ± 0.03                        | 0.09 ± 0.10                                  | 0.11 ± 0.09                                   | 0.19 ± 0.17                                    | 0.05 ± 0.13                                    |
|        | ba   | -244122.82 ± 0.03                        | 0.20 ± 0.10                                  | 0.25 ± 0.09                                   | 0.19 ± 0.13                                    | 0.27 ± 0.12                                    |
|        | bad  | -244123.36 ± 0.03                        | 0.12 ± 0.09                                  | 0.13 ± 0.09                                   | 0.17 ± 0.12                                    | 0.08 ± 0.11                                    |
|        | badq | -244115.45 ± 0.04                        | 0.03 ± 0.13                                  | 0.05 ± 0.14                                   | -0.14 ± 0.17                                   | 0.25 ± 0.17                                    |

Table 70: MM-to-QM unbound-state ligand binding free energy correction values 2- $\lambda$  states simulated for 20 ps

| Molec. | MM'  | $\Delta G_{\text{TI3}}^{N_\lambda=11}$ | $\Delta\Delta G_{\text{TI}}^{N_\lambda=2}$ | $\Delta\Delta G_{\text{BAR}}^{N_\lambda=2}$ | $\Delta\Delta G_{\text{IEXP}}^{N_\lambda=1}$ | $\Delta\Delta G_{\text{DEXP}}^{N_\lambda=1}$ |
|--------|------|----------------------------------------|--------------------------------------------|---------------------------------------------|----------------------------------------------|----------------------------------------------|
| BNZ    |      | -145560.88 $\pm$ 0.02                  | -0.31 $\pm$ 0.27                           | -0.48 $\pm$ 0.24                            | -0.76 $\pm$ 0.21                             | -0.91 $\pm$ 0.30                             |
|        | b    | -145561.34 $\pm$ 0.02                  | -0.16 $\pm$ 0.14                           | -0.22 $\pm$ 0.16                            | -0.57 $\pm$ 0.13                             | 0.01 $\pm$ 0.19                              |
|        | ba   | -145565.50 $\pm$ 0.02                  | -0.06 $\pm$ 0.18                           | -0.20 $\pm$ 0.16                            | -0.55 $\pm$ 0.13                             | 0.00 $\pm$ 0.18                              |
|        | bad  | -145565.89 $\pm$ 0.02                  | 0.01 $\pm$ 0.16                            | -0.05 $\pm$ 0.17                            | -0.48 $\pm$ 0.14                             | -0.04 $\pm$ 0.37                             |
|        | badq | -145567.87 $\pm$ 0.02                  | -0.49 $\pm$ 0.16                           | -0.52 $\pm$ 0.20                            | -0.62 $\pm$ 0.28                             | -0.31 $\pm$ 0.19                             |
| PXY    |      | -194836.27 $\pm$ 0.03                  | -0.05 $\pm$ 0.41                           | 0.13 $\pm$ 0.45                             | 0.20 $\pm$ 0.54                              | 0.73 $\pm$ 0.29                              |
|        | b    | -194836.91 $\pm$ 0.03                  | 0.21 $\pm$ 0.33                            | 0.46 $\pm$ 0.23                             | -0.47 $\pm$ 0.18                             | 1.47 $\pm$ 0.16                              |
|        | ba   | -194843.73 $\pm$ 0.02                  | -0.45 $\pm$ 0.24                           | -0.52 $\pm$ 0.31                            | -0.92 $\pm$ 0.32                             | -1.09 $\pm$ 0.52                             |
|        | bad  | -194843.91 $\pm$ 0.03                  | -0.57 $\pm$ 0.18                           | -0.55 $\pm$ 0.25                            | -0.93 $\pm$ 0.32                             | 0.00 $\pm$ 0.25                              |
|        | badq | -194849.04 $\pm$ 0.05                  | -0.37 $\pm$ 0.58                           | 0.92 $\pm$ 0.52                             | -0.10 $\pm$ 0.44                             | 2.44 $\pm$ 0.28                              |
| I4B    |      | -244115.78 $\pm$ 0.03                  | 0.16 $\pm$ 0.34                            | 0.58 $\pm$ 0.38                             | 0.54 $\pm$ 0.41                              | 0.63 $\pm$ 0.44                              |
|        | b    | -244116.51 $\pm$ 0.03                  | -0.22 $\pm$ 0.37                           | -0.34 $\pm$ 0.29                            | -0.68 $\pm$ 0.25                             | -0.31 $\pm$ 0.27                             |
|        | ba   | -244120.47 $\pm$ 0.03                  | -0.27 $\pm$ 0.25                           | -0.17 $\pm$ 0.35                            | -0.74 $\pm$ 0.27                             | 0.10 $\pm$ 0.42                              |
|        | bad  | -244120.69 $\pm$ 0.03                  | 0.17 $\pm$ 0.24                            | 0.23 $\pm$ 0.29                             | -0.79 $\pm$ 0.23                             | 1.28 $\pm$ 0.22                              |
|        | badq | -244118.97 $\pm$ 0.05                  | 0.21 $\pm$ 0.59                            | 1.10 $\pm$ 0.38                             | -0.06 $\pm$ 0.35                             | 2.34 $\pm$ 0.24                              |
| BZF    |      | -240488.93 $\pm$ 0.05                  | -0.72 $\pm$ 0.46                           | -1.03 $\pm$ 0.49                            | -1.97 $\pm$ 0.36                             | -0.54 $\pm$ 0.49                             |
|        | b    | -240488.68 $\pm$ 0.06                  | 0.95 $\pm$ 0.57                            | 0.61 $\pm$ 0.62                             | -1.70 $\pm$ 0.37                             | 2.85 $\pm$ 0.51                              |
|        | ba   | -240530.60 $\pm$ 0.04                  | -0.61 $\pm$ 0.35                           | -0.61 $\pm$ 0.33                            | -0.59 $\pm$ 0.36                             | -1.54 $\pm$ 0.44                             |
|        | bad  | -240530.12 $\pm$ 0.04                  | -0.22 $\pm$ 0.34                           | -0.44 $\pm$ 0.32                            | -0.71 $\pm$ 0.34                             | -0.13 $\pm$ 0.30                             |
|        | badq | -240532.72 $\pm$ 0.04                  | -1.32 $\pm$ 0.49                           | -1.15 $\pm$ 0.60                            | -2.20 $\pm$ 0.54                             | 0.23 $\pm$ 0.29                              |
| DEN    |      | -217978.56 $\pm$ 0.04                  | 0.25 $\pm$ 0.36                            | 0.98 $\pm$ 0.42                             | 0.22 $\pm$ 0.41                              | 2.08 $\pm$ 0.26                              |
|        | b    | -217978.34 $\pm$ 0.04                  | 0.25 $\pm$ 0.45                            | -0.08 $\pm$ 0.46                            | -0.66 $\pm$ 0.43                             | 0.72 $\pm$ 0.35                              |
|        | ba   | -218030.69 $\pm$ 0.03                  | 0.37 $\pm$ 0.26                            | 0.43 $\pm$ 0.29                             | -0.13 $\pm$ 0.23                             | 0.59 $\pm$ 0.42                              |

*Continued on next page*

Table 70 – Continued from previous page

| Molec. | MM'  | $\Delta G_{\text{TI3}}^{N_i=11}$ | $\Delta\Delta G_{\text{TI}}^{N_i=2}$ | $\Delta\Delta G_{\text{BAR}}^{N_i=2}$ | $\Delta\Delta G_{\text{IEXP}}^{N_i=1}$ | $\Delta\Delta G_{\text{DEXP}}^{N_i=1}$ |
|--------|------|----------------------------------|--------------------------------------|---------------------------------------|----------------------------------------|----------------------------------------|
|        | bad  | -218028.60 ± 0.03                | -0.34 ± 0.23                         | -0.27 ± 0.18                          | -0.15 ± 0.20                           | -0.30 ± 0.19                           |
|        | badq | -218029.62 ± 0.03                | -0.46 ± 0.37                         | 0.02 ± 0.30                           | -1.07 ± 0.25                           | 1.09 ± 0.24                            |
| IND    |      | -228035.76 ± 0.06                | -0.13 ± 0.61                         | 0.16 ± 0.55                           | -3.25 ± 0.36                           | 3.57 ± 0.44                            |
|        | b    | -228035.97 ± 0.06                | 0.72 ± 0.71                          | 0.33 ± 0.66                           | -3.14 ± 0.40                           | 3.80 ± 0.53                            |
|        | ba   | -228075.42 ± 0.05                | 0.68 ± 0.32                          | 0.40 ± 0.41                           | -2.71 ± 0.25                           | 3.51 ± 0.32                            |
|        | bad  | -228077.63 ± 0.04                | 0.46 ± 0.40                          | -0.21 ± 0.41                          | -2.77 ± 0.31                           | 2.35 ± 0.27                            |
|        | badq | -228062.14 ± 0.10                | -4.53 ± 1.18                         | -1.21 ± 0.77                          | -12.06 ± 0.56                          | 9.63 ± 0.53                            |
| OXE    |      | -194838.45 ± 0.03                | -0.50 ± 0.34                         | -0.71 ± 0.33                          | -1.45 ± 0.30                           | -0.06 ± 0.22                           |
|        | b    | -194839.14 ± 0.03                | -0.26 ± 0.28                         | 0.03 ± 0.31                           | -0.87 ± 0.22                           | 0.82 ± 0.29                            |
|        | ba   | -194846.72 ± 0.03                | -0.02 ± 0.29                         | 0.06 ± 0.30                           | -0.96 ± 0.23                           | 0.98 ± 0.22                            |
|        | bad  | -194847.04 ± 0.03                | -0.35 ± 0.28                         | -0.30 ± 0.26                          | -0.93 ± 0.23                           | 0.35 ± 0.24                            |
|        | badq | -194845.65 ± 0.04                | -0.95 ± 0.37                         | -0.29 ± 0.42                          | -2.46 ± 0.39                           | 1.93 ± 0.20                            |
| N4B    |      | -244115.61 ± 0.05                | -0.08 ± 0.29                         | -0.21 ± 0.39                          | -0.09 ± 0.50                           | 0.08 ± 0.37                            |
|        | b    | -244116.29 ± 0.03                | 0.35 ± 0.32                          | 0.39 ± 0.33                           | 0.88 ± 0.41                            | 0.76 ± 0.23                            |
|        | ba   | -244122.82 ± 0.03                | 0.36 ± 0.37                          | 0.43 ± 0.33                           | 0.52 ± 0.46                            | -0.09 ± 0.52                           |
|        | bad  | -244123.36 ± 0.03                | 0.34 ± 0.32                          | 0.51 ± 0.29                           | 0.58 ± 0.44                            | 0.99 ± 0.24                            |
|        | badq | -244115.45 ± 0.04                | -0.51 ± 0.47                         | 0.14 ± 0.51                           | -0.97 ± 0.43                           | 1.23 ± 0.45                            |

Table 71: MM-to-QM unbound-state ligand binding free energy correction values 3- $\lambda$  states simulated for 20 ps

| Molec. | MM'  | $\Delta G_{\text{TI}3}^{N_\lambda=11}$ | $\Delta\Delta G_{\text{TI}}^{N_\lambda=3}$ | $\Delta\Delta G_{\text{BAR}}^{N_\lambda=3}$ | $\Delta\Delta G_{\text{IEXP}}^{N_\lambda=2}$ | $\Delta\Delta G_{\text{DEXP}}^{N_\lambda=2}$ |
|--------|------|----------------------------------------|--------------------------------------------|---------------------------------------------|----------------------------------------------|----------------------------------------------|
| BNZ    |      | -145560.88 $\pm$ 0.02                  | -0.37 $\pm$ 0.20                           | -0.38 $\pm$ 0.15                            | -0.53 $\pm$ 0.15                             | -0.58 $\pm$ 0.26                             |
|        | b    | -145561.34 $\pm$ 0.02                  | 0.03 $\pm$ 0.17                            | -0.02 $\pm$ 0.12                            | -0.11 $\pm$ 0.15                             | 0.02 $\pm$ 0.16                              |
|        | ba   | -145565.50 $\pm$ 0.02                  | 0.19 $\pm$ 0.24                            | 0.08 $\pm$ 0.14                             | 0.23 $\pm$ 0.27                              | 0.06 $\pm$ 0.18                              |
|        | bad  | -145565.89 $\pm$ 0.02                  | 0.43 $\pm$ 0.08                            | 0.35 $\pm$ 0.08                             | 0.08 $\pm$ 0.08                              | 0.49 $\pm$ 0.17                              |
|        | badq | -145567.87 $\pm$ 0.02                  | 0.07 $\pm$ 0.21                            | -0.02 $\pm$ 0.15                            | -0.09 $\pm$ 0.17                             | -0.21 $\pm$ 0.32                             |
| PXY    |      | -194836.27 $\pm$ 0.03                  | 0.02 $\pm$ 0.35                            | 0.09 $\pm$ 0.28                             | 0.13 $\pm$ 0.40                              | -0.04 $\pm$ 0.34                             |
|        | b    | -194836.91 $\pm$ 0.03                  | 0.21 $\pm$ 0.24                            | 0.28 $\pm$ 0.20                             | -0.13 $\pm$ 0.19                             | 0.71 $\pm$ 0.20                              |
|        | ba   | -194843.73 $\pm$ 0.02                  | 0.02 $\pm$ 0.16                            | -0.04 $\pm$ 0.15                            | -0.41 $\pm$ 0.18                             | -0.08 $\pm$ 0.35                             |
|        | bad  | -194843.91 $\pm$ 0.03                  | -0.24 $\pm$ 0.18                           | -0.31 $\pm$ 0.14                            | -0.50 $\pm$ 0.21                             | -0.05 $\pm$ 0.17                             |
|        | badq | -194849.04 $\pm$ 0.05                  | -0.62 $\pm$ 0.37                           | -0.56 $\pm$ 0.41                            | -0.71 $\pm$ 0.35                             | 0.58 $\pm$ 0.38                              |
| I4B    |      | -244115.78 $\pm$ 0.03                  | 0.52 $\pm$ 0.21                            | 0.53 $\pm$ 0.20                             | 0.47 $\pm$ 0.32                              | 0.87 $\pm$ 0.26                              |
|        | b    | -244116.51 $\pm$ 0.03                  | 0.10 $\pm$ 0.23                            | 0.08 $\pm$ 0.20                             | -0.12 $\pm$ 0.26                             | 0.08 $\pm$ 0.25                              |
|        | ba   | -244120.47 $\pm$ 0.03                  | 0.40 $\pm$ 0.28                            | 0.27 $\pm$ 0.27                             | 0.25 $\pm$ 0.35                              | 0.39 $\pm$ 0.33                              |
|        | bad  | -244120.69 $\pm$ 0.03                  | -0.12 $\pm$ 0.20                           | -0.04 $\pm$ 0.19                            | -0.51 $\pm$ 0.21                             | 0.45 $\pm$ 0.17                              |
|        | badq | -244118.97 $\pm$ 0.05                  | -0.31 $\pm$ 0.58                           | 0.01 $\pm$ 0.41                             | 0.85 $\pm$ 0.55                              | 0.03 $\pm$ 0.39                              |
| BZF    |      | -240488.93 $\pm$ 0.05                  | -0.06 $\pm$ 0.37                           | -0.12 $\pm$ 0.31                            | -0.67 $\pm$ 0.31                             | -0.17 $\pm$ 0.44                             |
|        | b    | -240488.68 $\pm$ 0.06                  | 0.53 $\pm$ 0.49                            | 0.52 $\pm$ 0.46                             | -0.12 $\pm$ 0.45                             | 1.21 $\pm$ 0.46                              |
|        | ba   | -240530.60 $\pm$ 0.04                  | -0.55 $\pm$ 0.22                           | -0.56 $\pm$ 0.18                            | -0.59 $\pm$ 0.28                             | -0.77 $\pm$ 0.34                             |
|        | bad  | -240530.12 $\pm$ 0.04                  | 0.33 $\pm$ 0.39                            | 0.23 $\pm$ 0.29                             | 0.27 $\pm$ 0.33                              | -0.23 $\pm$ 0.37                             |
|        | badq | -240532.72 $\pm$ 0.04                  | -0.02 $\pm$ 0.39                           | -0.19 $\pm$ 0.37                            | -0.42 $\pm$ 0.56                             | 0.34 $\pm$ 0.31                              |
| DEN    |      | -217978.56 $\pm$ 0.04                  | -0.05 $\pm$ 0.30                           | 0.09 $\pm$ 0.27                             | -0.10 $\pm$ 0.35                             | 0.66 $\pm$ 0.31                              |
|        | b    | -217978.34 $\pm$ 0.04                  | 0.44 $\pm$ 0.36                            | 0.30 $\pm$ 0.29                             | 0.05 $\pm$ 0.36                              | 0.44 $\pm$ 0.36                              |
|        | ba   | -218030.69 $\pm$ 0.03                  | 0.29 $\pm$ 0.24                            | 0.31 $\pm$ 0.19                             | 0.19 $\pm$ 0.24                              | 0.47 $\pm$ 0.24                              |

*Continued on next page*

Table 71 – Continued from previous page

| Molec. | MM'  | $\Delta G_{\text{TI3}}^{N_{\lambda}=11}$ | $\Delta\Delta G_{\text{TI}}^{N_{\lambda}=3}$ | $\Delta\Delta G_{\text{BAR}}^{N_{\lambda}=3}$ | $\Delta\Delta G_{\text{IEXP}}^{N_{\lambda}=2}$ | $\Delta\Delta G_{\text{DEXP}}^{N_{\lambda}=2}$ |
|--------|------|------------------------------------------|----------------------------------------------|-----------------------------------------------|------------------------------------------------|------------------------------------------------|
|        | bad  | -218028.60 ± 0.03                        | -0.34 ± 0.30                                 | -0.39 ± 0.17                                  | 0.19 ± 0.35                                    | -0.51 ± 0.18                                   |
|        | badq | -218029.62 ± 0.03                        | -0.60 ± 0.32                                 | -0.42 ± 0.28                                  | -0.65 ± 0.31                                   | -0.03 ± 0.29                                   |
| IND    |      | -228035.76 ± 0.06                        | -0.49 ± 0.53                                 | -0.34 ± 0.43                                  | -1.53 ± 0.40                                   | 0.42 ± 0.47                                    |
|        | b    | -228035.97 ± 0.06                        | 0.76 ± 0.60                                  | 0.60 ± 0.54                                   | -0.31 ± 0.54                                   | 1.21 ± 0.62                                    |
|        | ba   | -228075.42 ± 0.05                        | 1.03 ± 0.34                                  | 0.87 ± 0.35                                   | -0.53 ± 0.26                                   | 1.98 ± 0.40                                    |
|        | bad  | -228077.63 ± 0.04                        | -0.31 ± 0.23                                 | -0.40 ± 0.26                                  | -1.74 ± 0.23                                   | 0.91 ± 0.24                                    |
|        | badq | -228062.14 ± 0.10                        | -1.39 ± 1.02                                 | -0.70 ± 0.90                                  | -3.62 ± 0.74                                   | 2.29 ± 0.58                                    |
| OXE    |      | -194838.45 ± 0.03                        | -0.29 ± 0.33                                 | -0.37 ± 0.25                                  | -0.56 ± 0.32                                   | -0.40 ± 0.36                                   |
|        | b    | -194839.14 ± 0.03                        | 0.13 ± 0.29                                  | 0.08 ± 0.23                                   | -0.03 ± 0.30                                   | 0.46 ± 0.26                                    |
|        | ba   | -194846.72 ± 0.03                        | 0.58 ± 0.27                                  | 0.46 ± 0.24                                   | 0.14 ± 0.25                                    | 0.85 ± 0.24                                    |
|        | bad  | -194847.04 ± 0.03                        | -0.31 ± 0.28                                 | -0.25 ± 0.19                                  | -0.52 ± 0.20                                   | -0.32 ± 0.37                                   |
|        | badq | -194845.65 ± 0.04                        | -0.13 ± 0.25                                 | -0.15 ± 0.25                                  | -1.07 ± 0.35                                   | 1.09 ± 0.17                                    |
| N4B    |      | -244115.61 ± 0.05                        | -0.41 ± 0.25                                 | -0.34 ± 0.22                                  | -0.49 ± 0.32                                   | -0.27 ± 0.32                                   |
|        | b    | -244116.29 ± 0.03                        | -0.16 ± 0.31                                 | -0.07 ± 0.21                                  | 0.26 ± 0.36                                    | -0.16 ± 0.34                                   |
|        | ba   | -244122.82 ± 0.03                        | 0.65 ± 0.30                                  | 0.56 ± 0.22                                   | 0.83 ± 0.38                                    | 0.51 ± 0.35                                    |
|        | bad  | -244123.36 ± 0.03                        | -0.06 ± 0.31                                 | 0.07 ± 0.25                                   | 0.16 ± 0.36                                    | 0.02 ± 0.32                                    |
|        | badq | -244115.45 ± 0.04                        | -0.15 ± 0.46                                 | -0.10 ± 0.32                                  | 0.05 ± 0.48                                    | 0.09 ± 0.41                                    |



Table 72: MM-to-QM unbound-state ligand binding free energy correction values 6- $\lambda$  states simulated for 20 ps

| Molec. | MM'  | $\Delta G_{\text{TI}3}^{N_\lambda=11}$ | $\Delta \Delta G_{\text{TI}}^{N_\lambda=6}$ | $\Delta \Delta G_{\text{BAR}}^{N_\lambda=6}$ | $\Delta \Delta G_{\text{IEXP}}^{N_\lambda=5}$ | $\Delta \Delta G_{\text{DEXP}}^{N_\lambda=5}$ |
|--------|------|----------------------------------------|---------------------------------------------|----------------------------------------------|-----------------------------------------------|-----------------------------------------------|
| BNZ    |      | -145560.88 $\pm$ 0.02                  | -0.18 $\pm$ 0.15                            | -0.19 $\pm$ 0.11                             | -0.19 $\pm$ 0.14                              | -0.26 $\pm$ 0.17                              |
|        | b    | -145561.34 $\pm$ 0.02                  | 0.02 $\pm$ 0.12                             | 0.02 $\pm$ 0.09                              | 0.03 $\pm$ 0.13                               | 0.01 $\pm$ 0.13                               |
|        | ba   | -145565.50 $\pm$ 0.02                  | -0.24 $\pm$ 0.08                            | -0.24 $\pm$ 0.07                             | -0.31 $\pm$ 0.08                              | -0.19 $\pm$ 0.09                              |
|        | bad  | -145565.89 $\pm$ 0.02                  | -0.07 $\pm$ 0.12                            | -0.06 $\pm$ 0.08                             | -0.07 $\pm$ 0.12                              | -0.05 $\pm$ 0.12                              |
|        | badq | -145567.87 $\pm$ 0.02                  | -0.51 $\pm$ 0.12                            | -0.52 $\pm$ 0.09                             | -0.50 $\pm$ 0.14                              | -0.52 $\pm$ 0.12                              |
| PXY    |      | -194836.27 $\pm$ 0.03                  | 0.07 $\pm$ 0.19                             | 0.11 $\pm$ 0.15                              | 0.07 $\pm$ 0.20                               | 0.10 $\pm$ 0.23                               |
|        | b    | -194836.91 $\pm$ 0.03                  | 0.03 $\pm$ 0.18                             | 0.04 $\pm$ 0.14                              | -0.03 $\pm$ 0.19                              | 0.14 $\pm$ 0.18                               |
|        | ba   | -194843.73 $\pm$ 0.02                  | -0.15 $\pm$ 0.15                            | -0.18 $\pm$ 0.12                             | -0.23 $\pm$ 0.18                              | -0.19 $\pm$ 0.20                              |
|        | bad  | -194843.91 $\pm$ 0.03                  | -0.03 $\pm$ 0.16                            | -0.09 $\pm$ 0.10                             | -0.08 $\pm$ 0.16                              | -0.05 $\pm$ 0.14                              |
|        | badq | -194849.04 $\pm$ 0.05                  | -0.23 $\pm$ 0.30                            | -0.27 $\pm$ 0.24                             | -0.20 $\pm$ 0.31                              | -0.02 $\pm$ 0.32                              |
| I4B    |      | -244115.78 $\pm$ 0.03                  | -0.01 $\pm$ 0.26                            | 0.03 $\pm$ 0.17                              | 0.31 $\pm$ 0.28                               | -0.11 $\pm$ 0.24                              |
|        | b    | -244116.51 $\pm$ 0.03                  | -0.21 $\pm$ 0.14                            | -0.19 $\pm$ 0.13                             | -0.30 $\pm$ 0.15                              | -0.13 $\pm$ 0.18                              |
|        | ba   | -244120.47 $\pm$ 0.03                  | -0.28 $\pm$ 0.19                            | -0.30 $\pm$ 0.13                             | -0.26 $\pm$ 0.20                              | -0.32 $\pm$ 0.17                              |
|        | bad  | -244120.69 $\pm$ 0.03                  | 0.11 $\pm$ 0.16                             | 0.11 $\pm$ 0.13                              | -0.01 $\pm$ 0.17                              | 0.23 $\pm$ 0.16                               |
|        | badq | -244118.97 $\pm$ 0.05                  | 0.08 $\pm$ 0.24                             | 0.11 $\pm$ 0.20                              | 0.06 $\pm$ 0.30                               | 0.39 $\pm$ 0.22                               |
| BZF    |      | -240488.93 $\pm$ 0.05                  | 0.04 $\pm$ 0.31                             | 0.02 $\pm$ 0.21                              | 0.21 $\pm$ 0.35                               | -0.04 $\pm$ 0.27                              |
|        | b    | -240488.68 $\pm$ 0.06                  | 0.15 $\pm$ 0.37                             | 0.14 $\pm$ 0.28                              | 0.32 $\pm$ 0.40                               | 0.11 $\pm$ 0.36                               |
|        | ba   | -240530.60 $\pm$ 0.04                  | -0.62 $\pm$ 0.22                            | -0.59 $\pm$ 0.15                             | -0.42 $\pm$ 0.16                              | -0.80 $\pm$ 0.25                              |
|        | bad  | -240530.12 $\pm$ 0.04                  | 0.16 $\pm$ 0.19                             | 0.14 $\pm$ 0.15                              | 0.13 $\pm$ 0.19                               | 0.14 $\pm$ 0.19                               |
|        | badq | -240532.72 $\pm$ 0.04                  | 0.12 $\pm$ 0.26                             | 0.07 $\pm$ 0.20                              | -0.01 $\pm$ 0.30                              | 0.20 $\pm$ 0.25                               |
| DEN    |      | -217978.56 $\pm$ 0.04                  | -0.14 $\pm$ 0.21                            | -0.13 $\pm$ 0.16                             | -0.22 $\pm$ 0.23                              | 0.01 $\pm$ 0.24                               |
|        | b    | -217978.34 $\pm$ 0.04                  | -0.26 $\pm$ 0.24                            | -0.27 $\pm$ 0.17                             | -0.31 $\pm$ 0.25                              | -0.25 $\pm$ 0.24                              |
|        | ba   | -218030.69 $\pm$ 0.03                  | 0.39 $\pm$ 0.15                             | 0.36 $\pm$ 0.11                              | 0.30 $\pm$ 0.14                               | 0.40 $\pm$ 0.16                               |

*Continued on next page*

Table 72 – Continued from previous page

| Molec. | MM'  | $\Delta G_{\text{TI3}}^{N_{\lambda}=11}$ | $\Delta\Delta G_{\text{TI}}^{N_{\lambda}=6}$ | $\Delta\Delta G_{\text{BAR}}^{N_{\lambda}=6}$ | $\Delta\Delta G_{\text{IEXP}}^{N_{\lambda}=5}$ | $\Delta\Delta G_{\text{DEXP}}^{N_{\lambda}=5}$ |
|--------|------|------------------------------------------|----------------------------------------------|-----------------------------------------------|------------------------------------------------|------------------------------------------------|
|        | bad  | -218028.60 ± 0.03                        | 0.28 ± 0.18                                  | 0.29 ± 0.12                                   | 0.43 ± 0.17                                    | 0.13 ± 0.18                                    |
|        | badq | -218029.62 ± 0.03                        | 0.18 ± 0.18                                  | 0.15 ± 0.14                                   | 0.05 ± 0.21                                    | 0.35 ± 0.16                                    |
| IND    |      | -228035.76 ± 0.06                        | -0.14 ± 0.32                                 | -0.16 ± 0.24                                  | -0.43 ± 0.31                                   | 0.26 ± 0.27                                    |
|        | b    | -228035.97 ± 0.06                        | -0.53 ± 0.36                                 | -0.52 ± 0.33                                  | -0.77 ± 0.37                                   | -0.30 ± 0.43                                   |
|        | ba   | -228075.42 ± 0.05                        | 0.24 ± 0.25                                  | 0.25 ± 0.19                                   | -0.14 ± 0.26                                   | 0.65 ± 0.24                                    |
|        | bad  | -228077.63 ± 0.04                        | -0.20 ± 0.27                                 | -0.26 ± 0.19                                  | -0.38 ± 0.31                                   | -0.05 ± 0.24                                   |
|        | badq | -228062.14 ± 0.10                        | -1.28 ± 0.53                                 | -1.16 ± 0.49                                  | -2.32 ± 0.53                                   | 0.00 ± 0.58                                    |
| OXE    |      | -194838.45 ± 0.03                        | -0.15 ± 0.17                                 | -0.18 ± 0.15                                  | -0.32 ± 0.21                                   | -0.07 ± 0.22                                   |
|        | b    | -194839.14 ± 0.03                        | -0.01 ± 0.17                                 | 0.02 ± 0.12                                   | -0.10 ± 0.15                                   | 0.08 ± 0.21                                    |
|        | ba   | -194846.72 ± 0.03                        | -0.24 ± 0.18                                 | -0.23 ± 0.13                                  | -0.30 ± 0.18                                   | -0.16 ± 0.20                                   |
|        | bad  | -194847.04 ± 0.03                        | -0.03 ± 0.15                                 | -0.05 ± 0.10                                  | -0.16 ± 0.14                                   | 0.05 ± 0.15                                    |
|        | badq | -194845.65 ± 0.04                        | -0.06 ± 0.26                                 | -0.08 ± 0.20                                  | -0.18 ± 0.26                                   | 0.09 ± 0.28                                    |
| N4B    |      | -244115.61 ± 0.05                        | -0.30 ± 0.19                                 | -0.29 ± 0.14                                  | -0.30 ± 0.19                                   | -0.26 ± 0.19                                   |
|        | b    | -244116.29 ± 0.03                        | -0.02 ± 0.20                                 | 0.00 ± 0.14                                   | 0.10 ± 0.21                                    | -0.08 ± 0.20                                   |
|        | ba   | -244122.82 ± 0.03                        | 0.30 ± 0.20                                  | 0.30 ± 0.15                                   | 0.34 ± 0.24                                    | 0.28 ± 0.22                                    |
|        | bad  | -244123.36 ± 0.03                        | 0.54 ± 0.17                                  | 0.54 ± 0.12                                   | 0.54 ± 0.17                                    | 0.59 ± 0.16                                    |
|        | badq | -244115.45 ± 0.04                        | -0.54 ± 0.24                                 | -0.50 ± 0.22                                  | -0.60 ± 0.27                                   | -0.37 ± 0.28                                   |
